# Supplementary material for: Translocation, genetic structure and homing ability confirm geographic barriers disrupt saltwater crocodile movement and dispersal
Source: PLoS One. 2019 Aug 28;14(8):e0205862. doi: 10.1371/journal.pone.0205862 (PMC6713319; doi:10.1371/journal.pone.0205862)
Supplement: S1 File — (ZIP) [file pone.0205862.s001.zip]

Archive with 13 entries (12 files):
- Cobourg croc paper genetic analyses/
- Cobourg croc paper genetic analyses/IBS vs Cost Distance.pdf
- Cobourg croc paper genetic analyses/IBS vs Distance.pdf
- Cobourg croc paper genetic analyses/idpop_file_regions.csv
- Cobourg croc paper genetic analyses/kinship_MLPE.xlsx
- Cobourg croc paper genetic analyses/popdist.csv
- Cobourg croc paper genetic analyses/R SCRIPT - corMLPE_unsupp.R
- Cobourg croc paper genetic analyses/R SCRIPT - Create cost distance matrix.R
- Cobourg croc paper genetic analyses/R SCRIPT - DArTseq croc filtring and analysis for Cobourg paper.R
- Cobourg croc paper genetic analyses/R SCRIPT - IBD + Cobourg MLPE model fitting.txt
- Cobourg croc paper genetic analyses/Report_DCroc17-2955_1_moreOrders_SNP_singlerow_1_Cob_paper.csv
- Cobourg croc paper genetic analyses/resistance100.asc
- Cobourg croc paper genetic analyses/Sampling locations for Cobourg paper genetics.xlsx
