# Supplementary material for: Translocation, genetic structure and homing ability confirm geographic barriers disrupt saltwater crocodile movement and dispersal
Source: PLoS One. 2019 Aug 28;14(8):e0205862. doi: 10.1371/journal.pone.0205862 (PMC6713319; doi:10.1371/journal.pone.0205862)
Supplement: S1 File — (ZIP) [file pone.0205862.s001.zip › Cobourg croc paper genetic analyses/idpop_file_regions.csv]

id	pop	smallpop
CP0001	Adelaide River	Janamba Donalds Lagoon Station
CP0007	Adelaide River	Janamba Donalds Lagoon Station
CP0206	Adelaide River	Walker Beatrice Hill Station
CP0398	Adelaide River	Walker Beatrice Hill Station
CP0177	Adelaide River	WHNT Adelaide River Station
CP0296	Adelaide River	WHNT Adelaide River Station
CP0204	Adelaide River	WMI Djukbinj National Park
CP0399	Adelaide River	WMI Djukbinj National Park
CP0199	Adelaide River	WMI Djukbinj National Park
CP0207	Adelaide River	WMI Djukbinj National Park
CP0200	Adelaide River	WMI Djukbinj National Park
CP0208	Adelaide River	WMI Djukbinj National Park
CP0201	Adelaide River	WMI Djukbinj National Park
CP0202	Adelaide River	WMI Djukbinj National Park
CP0397	Adelaide River	WMI Djukbinj National Park
CP0203	Adelaide River	WMI Djukbinj National Park
CP0205	Adelaide River	WMI Harrison Dam
CP0400	Adelaide River	WMI Harrison Dam
CP0401	Adelaide River	WMI Koolpinyah Station
CP0042	Arafura Swamp	WHNT Arafura Swamp Darbilla Creek
CP0072	Arafura Swamp	WHNT Arafura Swamp Darbilla Creek
CP0173	Arafura Swamp	WHNT Arafura Swamp Darbilla Creek
CP0187	Arafura Swamp	WHNT Arafura Swamp Darbilla Creek
CP0286	Arafura Swamp	WHNT Arafura Swamp Darbilla Creek
CP0045	Arafura Swamp	WHNT Arafura Swamp Darbilla Creek
CP0075	Arafura Swamp	WHNT Arafura Swamp Darbilla Creek
CP0174	Arafura Swamp	WHNT Arafura Swamp Darbilla Creek
CP0267	Arafura Swamp	WHNT Arafura Swamp Darbilla Creek
CP0288	Arafura Swamp	WHNT Arafura Swamp Darbilla Creek
CP0047	Arafura Swamp	WHNT Arafura Swamp Darbilla Creek
CP0076	Arafura Swamp	WHNT Arafura Swamp Darbilla Creek
CP0175	Arafura Swamp	WHNT Arafura Swamp Darbilla Creek
CP0271	Arafura Swamp	WHNT Arafura Swamp Darbilla Creek
CP0291	Arafura Swamp	WHNT Arafura Swamp Darbilla Creek
CP0026	Arafura Swamp	WHNT Arafura Swamp Darbilla Creek
CP0051	Arafura Swamp	WHNT Arafura Swamp Darbilla Creek
CP0077	Arafura Swamp	WHNT Arafura Swamp Darbilla Creek
CP0180	Arafura Swamp	WHNT Arafura Swamp Darbilla Creek
CP0273	Arafura Swamp	WHNT Arafura Swamp Darbilla Creek
CP0027	Arafura Swamp	WHNT Arafura Swamp Darbilla Creek
CP0055	Arafura Swamp	WHNT Arafura Swamp Darbilla Creek
CP0163	Arafura Swamp	WHNT Arafura Swamp Darbilla Creek
CP0181	Arafura Swamp	WHNT Arafura Swamp Darbilla Creek
CP0275	Arafura Swamp	WHNT Arafura Swamp Darbilla Creek
CP0028	Arafura Swamp	WHNT Arafura Swamp Darbilla Creek
CP0063	Arafura Swamp	WHNT Arafura Swamp Darbilla Creek
CP0166	Arafura Swamp	WHNT Arafura Swamp Darbilla Creek
CP0182	Arafura Swamp	WHNT Arafura Swamp Darbilla Creek
CP0278	Arafura Swamp	WHNT Arafura Swamp Darbilla Creek
CP0031	Arafura Swamp	WHNT Arafura Swamp Darbilla Creek
CP0065	Arafura Swamp	WHNT Arafura Swamp Darbilla Creek
CP0168	Arafura Swamp	WHNT Arafura Swamp Darbilla Creek
CP0183	Arafura Swamp	WHNT Arafura Swamp Darbilla Creek
CP0281	Arafura Swamp	WHNT Arafura Swamp Darbilla Creek
CP0040	Arafura Swamp	WHNT Arafura Swamp Darbilla Creek
CP0070	Arafura Swamp	WHNT Arafura Swamp Darbilla Creek
CP0172	Arafura Swamp	WHNT Arafura Swamp Darbilla Creek
CP0184	Arafura Swamp	WHNT Arafura Swamp Darbilla Creek
CP0285	Arafura Swamp	WHNT Arafura Swamp Darbilla Creek
CP0218	Cobourg Murganella Creek	DEMED East Alligator River (Janamba)
CP0219	Cobourg Murganella Creek	DEMED East Alligator River (Janamba)
CP0003	Cobourg Murganella Creek	DEMED East Alligator River (Janamba)
CP0004	Cobourg Murganella Creek	DEMED East Alligator River (Janamba)
CP0229	Cobourg Murganella Creek	DEMED East Alligator River (Janamba)
CP0230	Cobourg Murganella Creek	DEMED East Alligator River (Janamba)
CP0217	Cobourg Murganella Creek	DEMED East Alligator River (Janamba)
CP0232	Cobourg Murganella Creek	Janamba Coburg Peninsula
CP0234	Cobourg Murganella Creek	Janamba Coburg Peninsula
CP0235	Cobourg Murganella Creek	Janamba Coburg Peninsula
CP0221	Cobourg Murganella Creek	Janamba Coburg Peninsula
CP0002	Cobourg Murganella Creek	Janamba Coburg Peninsula
CP0222	Cobourg Murganella Creek	Janamba Coburg Peninsula
CP0223	Cobourg Murganella Creek	Janamba Coburg Peninsula
CP0008	Cobourg Murganella Creek	Janamba Coburg Peninsula
CP0231	Cobourg Murganella Creek	Janamba Coburg Peninsula
CP0239	Finniss River	Janamba Muk Muk Mugalimba
CP0220	Finniss River	Janamba Muk Muk Mugalimba
CP0225	Finniss River	Janamba Muk Muk Mugalimba
CP0233	Finniss River	Janamba Muk Muk Mugalimba
CP0236	Finniss River	Janamba Muk Muk Mugalimba
CP0237	Finniss River	Janamba Muk Muk Mugalimba
CP0238	Finniss River	Janamba Muk Muk Mugalimba
CP0179	Finniss River	WHNT Elizabeth Downs Station
CP0252	Finniss River	WHNT Elizabeth Downs Station
CP0193	Finniss River	WHNT Labelle Downs Station
CP0257	Finniss River	WHNT Labelle Downs Station
CP0053	Finniss River	WHNT Labelle Downs Station
CP0259	Finniss River	WHNT Labelle Downs Station
CP0262	Finniss River	WHNT Labelle Downs Station
CP0268	Finniss River	WHNT Labelle Downs Station
CP0250	Finniss River	WHNT Labelle Downs Station
CP0176	Finniss River	WHNT Labelle Downs Station
CP0272	Finniss River	WHNT Labelle Downs Station
CP0044	Finniss River	WHNT Labelle Downs Station
CP0255	Finniss River	WHNT Labelle Downs Station
CP0025	Finniss River	WHNT Litchfield Station
CP0046	Finniss River	WHNT Litchfield Station
CP0196	Finniss River	WHNT Litchfield Station
CP0244	Finniss River	WHNT Litchfield Station
CP0030	Finniss River	WHNT Litchfield Station
CP0071	Finniss River	WHNT Litchfield Station
CP0246	Finniss River	WHNT Litchfield Station
CP0247	Finniss River	WHNT Litchfield Station
CP0035	Finniss River	WHNT Litchfield Station
CP0269	Finniss River	WHNT Litchfield Station
CP0036	Finniss River	WHNT Litchfield Station
CP0251	Finniss River	WHNT Litchfield Station
CP0270	Finniss River	WHNT Litchfield Station
CP0043	Finniss River	WHNT Litchfield Station
CP0019	Finniss River	WHNT Litchfield Station
CP0190	Finniss River	WHNT Litchfield Station
CP0032	Finniss River	WHNT Wagait Finniss River
CP0074	Finniss River	WHNT Wagait Finniss River
CP0164	Finniss River	WHNT Wagait Finniss River
CP0029	Finniss River	WHNT Welltree Station
CP0300	Maningrida King River	WHNT King River Goomadeer River
CP0170	Maningrida King River	WHNT King River Goomadeer River
CP0301	Maningrida King River	WHNT King River Goomadeer River
CP0360	Maningrida King River	WHNT King River Goomadeer River
CP0308	Maningrida King River	WHNT King River Goomadeer River
CP0380	Maningrida King River	WHNT King River Goomadeer River
CP0034	Maningrida King River	WHNT King River Goomadeer River
CP0331	Maningrida King River	WHNT King River Goomadeer River
CP0057	Maningrida King River	WHNT King River Goomadeer River
CP0066	Maningrida King River	WHNT King River Goomadeer River
CP0263	Maningrida King River	WHNT King River Goomadeer River
CP0297	Maningrida King River	WHNT Maningrida Bawinanga Liverpool Rv Blyth Rv
CP0340	Maningrida King River	WHNT Maningrida Bawinanga Liverpool Rv Blyth Rv
CP0165	Maningrida King River	WHNT Maningrida Bawinanga Liverpool Rv Blyth Rv
CP0342	Maningrida King River	WHNT Maningrida Bawinanga Liverpool Rv Blyth Rv
CP0020	Maningrida King River	WHNT Maningrida Bawinanga Liverpool Rv Blyth Rv
CP0023	Maningrida King River	WHNT Maningrida Bawinanga Liverpool Rv Blyth Rv
CP0171	Maningrida King River	WHNT Maningrida Bawinanga Liverpool Rv Blyth Rv
CP0374	Maningrida King River	WHNT Maningrida Bawinanga Liverpool Rv Blyth Rv
CP0033	Maningrida King River	WHNT Maningrida Bawinanga Liverpool Rv Blyth Rv
CP0186	Maningrida King River	WHNT Maningrida Bawinanga Liverpool Rv Blyth Rv
CP0329	Maningrida King River	WHNT Maningrida Bawinanga Liverpool Rv Blyth Rv
CP0191	Maningrida King River	WHNT Maningrida Bawinanga Liverpool Rv Blyth Rv
CP0037	Maningrida King River	WHNT Maningrida Bawinanga Liverpool Rv Blyth Rv
CP0245	Maningrida King River	WHNT Maningrida Bawinanga Liverpool Rv Blyth Rv
CP0337	Maningrida King River	WHNT Maningrida Bawinanga Liverpool Rv Blyth Rv
CP0253	Maningrida King River	WHNT Maningrida Bawinanga Liverpool Rv Blyth Rv
CP0338	Maningrida King River	WHNT Maningrida Bawinanga Liverpool Rv Blyth Rv
CP0010	Mary River	Janamba Swim Creek Station
CP0224	Mary River	Janamba Swim Creek Station
CP0226	Mary River	Janamba Swim Creek Station
CP0227	Mary River	Janamba Swim Creek Station
CP0228	Mary River	Janamba Swim Creek Station
CP0005	Mary River	Janamba Swim Creek Station
CP0240	Mary River	Janamba Swim Creek Station
CP0006	Mary River	Janamba Swim Creek Station
CP0009	Mary River	Janamba Swim Creek Station
CP0022	Tiwi Islands	WHNT Tiwi Islands
CP0052	Tiwi Islands	WHNT Tiwi Islands
CP0078	Tiwi Islands	WHNT Tiwi Islands
CP0024	Tiwi Islands	WHNT Tiwi Islands
CP0054	Tiwi Islands	WHNT Tiwi Islands
CP0167	Tiwi Islands	WHNT Tiwi Islands
CP0038	Tiwi Islands	WHNT Tiwi Islands
CP0056	Tiwi Islands	WHNT Tiwi Islands
CP0169	Tiwi Islands	WHNT Tiwi Islands
CP0039	Tiwi Islands	WHNT Tiwi Islands
CP0064	Tiwi Islands	WHNT Tiwi Islands
CP0178	Tiwi Islands	WHNT Tiwi Islands
CP0041	Tiwi Islands	WHNT Tiwi Islands
CP0067	Tiwi Islands	WHNT Tiwi Islands
CP0185	Tiwi Islands	WHNT Tiwi Islands
CP0048	Tiwi Islands	WHNT Tiwi Islands
CP0068	Tiwi Islands	WHNT Tiwi Islands
CP0188	Tiwi Islands	WHNT Tiwi Islands
CP0049	Tiwi Islands	WHNT Tiwi Islands
CP0069	Tiwi Islands	WHNT Tiwi Islands
CP0050	Tiwi Islands	WHNT Tiwi Islands
CP0073	Tiwi Islands	WHNT Tiwi Islands
CP0021	Tiwi Islands	WHNT Tiwi Islands
CP0189	Tiwi Islands	WHNT Tiwi Islands
CP0258	Tiwi Islands	WHNT Tiwi Islands
CP0287	Tiwi Islands	WHNT Tiwi Islands
CP0192	Tiwi Islands	WHNT Tiwi Islands
CP0260	Tiwi Islands	WHNT Tiwi Islands
CP0194	Tiwi Islands	WHNT Tiwi Islands
CP0261	Tiwi Islands	WHNT Tiwi Islands
CP0195	Tiwi Islands	WHNT Tiwi Islands
CP0264	Tiwi Islands	WHNT Tiwi Islands
CP0248	Tiwi Islands	WHNT Tiwi Islands
CP0265	Tiwi Islands	WHNT Tiwi Islands
CP0249	Tiwi Islands	WHNT Tiwi Islands
CP0266	Tiwi Islands	WHNT Tiwi Islands
CP0254	Tiwi Islands	WHNT Tiwi Islands
CP0279	Tiwi Islands	WHNT Tiwi Islands
CP0256	Tiwi Islands	WHNT Tiwi Islands
CP0282	Tiwi Islands	WHNT Tiwi Islands
