# Supplementary material for: Translocation, genetic structure and homing ability confirm geographic barriers disrupt saltwater crocodile movement and dispersal
Source: PLoS One. 2019 Aug 28;14(8):e0205862. doi: 10.1371/journal.pone.0205862 (PMC6713319; doi:10.1371/journal.pone.0205862)
Supplement: S1 File — (ZIP) [file pone.0205862.s001.zip › Cobourg croc paper genetic analyses/kinship_MLPE.xlsx]

## Sheet: kinship_MLPE
Order	ID1	ID2	IBS0	kinship	Pop1	Pop2	Pop_comp	IBS	Cob_span	Dist
33437	CP0218	CP0007	0.0784632	-0.134004	DEMED East Alligator River	Janamba Donalds Lagoon Station	DEMED East Alligator River_Janamba Donalds Lagoon Station	0.7546	0	193.589
50072	CP0230	CP0239	0.0778421	-0.147321	DEMED East Alligator River	Janamba Muk Muk Mugalimba	DEMED East Alligator River_Janamba Muk Muk Mugalimba	0.749728	0	296.04
47630	CP0004	CP0239	0.0779009	-0.139964	DEMED East Alligator River	Janamba Muk Muk Mugalimba	DEMED East Alligator River_Janamba Muk Muk Mugalimba	0.753677	0	296.04
45044	CP0003	CP0239	0.0759884	-0.13594	DEMED East Alligator River	Janamba Muk Muk Mugalimba	DEMED East Alligator River_Janamba Muk Muk Mugalimba	0.754443	0	296.04
47653	CP0004	CP0220	0.0691653	-0.134151	DEMED East Alligator River	Janamba Muk Muk Mugalimba	DEMED East Alligator River_Janamba Muk Muk Mugalimba	0.755477	0	296.04
50095	CP0230	CP0220	0.0691336	-0.134053	DEMED East Alligator River	Janamba Muk Muk Mugalimba	DEMED East Alligator River_Janamba Muk Muk Mugalimba	0.756227	0	296.04
47862	CP0229	CP0220	0.0707436	-0.133248	DEMED East Alligator River	Janamba Muk Muk Mugalimba	DEMED East Alligator River_Janamba Muk Muk Mugalimba	0.758187	0	296.04
45067	CP0003	CP0220	0.0685353	-0.133053	DEMED East Alligator River	Janamba Muk Muk Mugalimba	DEMED East Alligator River_Janamba Muk Muk Mugalimba	0.755787	0	296.04
47839	CP0229	CP0239	0.074941	-0.130466	DEMED East Alligator River	Janamba Muk Muk Mugalimba	DEMED East Alligator River_Janamba Muk Muk Mugalimba	0.755761	0	296.04
33564	CP0218	CP0225	0.0697085	-0.0995483	DEMED East Alligator River	Janamba Muk Muk Mugalimba	DEMED East Alligator River_Janamba Muk Muk Mugalimba	0.757288	0	296.04
47886	CP0229	CP0233	0.0676067	-0.095839	DEMED East Alligator River	Janamba Muk Muk Mugalimba	DEMED East Alligator River_Janamba Muk Muk Mugalimba	0.751808	0	296.04
47898	CP0229	CP0236	0.070674	-0.0956237	DEMED East Alligator River	Janamba Muk Muk Mugalimba	DEMED East Alligator River_Janamba Muk Muk Mugalimba	0.755829	0	296.04
47909	CP0229	CP0237	0.0668385	-0.0920778	DEMED East Alligator River	Janamba Muk Muk Mugalimba	DEMED East Alligator River_Janamba Muk Muk Mugalimba	0.753084	0	296.04
47920	CP0229	CP0238	0.067028	-0.0890061	DEMED East Alligator River	Janamba Muk Muk Mugalimba	DEMED East Alligator River_Janamba Muk Muk Mugalimba	0.754381	0	296.04
36702	CP0219	CP0220	0.0609888	-0.0841258	DEMED East Alligator River	Janamba Muk Muk Mugalimba	DEMED East Alligator River_Janamba Muk Muk Mugalimba	0.772826	0	296.04
45103	CP0003	CP0236	0.0666545	-0.0806396	DEMED East Alligator River	Janamba Muk Muk Mugalimba	DEMED East Alligator River_Janamba Muk Muk Mugalimba	0.759151	0	296.04
47689	CP0004	CP0236	0.0679913	-0.0790378	DEMED East Alligator River	Janamba Muk Muk Mugalimba	DEMED East Alligator River_Janamba Muk Muk Mugalimba	0.760846	0	296.04
47874	CP0229	CP0225	0.0655797	-0.0683527	DEMED East Alligator River	Janamba Muk Muk Mugalimba	DEMED East Alligator River_Janamba Muk Muk Mugalimba	0.764312	0	296.04
47677	CP0004	CP0233	0.0647729	-0.0647423	DEMED East Alligator River	Janamba Muk Muk Mugalimba	DEMED East Alligator River_Janamba Muk Muk Mugalimba	0.751493	0	296.04
33576	CP0218	CP0233	0.0598121	-0.0621086	DEMED East Alligator River	Janamba Muk Muk Mugalimba	DEMED East Alligator River_Janamba Muk Muk Mugalimba	0.767889	0	296.04
33529	CP0218	CP0239	0.0616389	-0.059065	DEMED East Alligator River	Janamba Muk Muk Mugalimba	DEMED East Alligator River_Janamba Muk Muk Mugalimba	0.777647	0	296.04
36679	CP0219	CP0239	0.0591641	-0.0586552	DEMED East Alligator River	Janamba Muk Muk Mugalimba	DEMED East Alligator River_Janamba Muk Muk Mugalimba	0.776551	0	296.04
33610	CP0218	CP0238	0.0608523	-0.0550936	DEMED East Alligator River	Janamba Muk Muk Mugalimba	DEMED East Alligator River_Janamba Muk Muk Mugalimba	0.771578	0	296.04
52032	CP0217	CP0225	0.0652647	-0.0543997	DEMED East Alligator River	Janamba Muk Muk Mugalimba	DEMED East Alligator River_Janamba Muk Muk Mugalimba	0.770577	0	296.04
52078	CP0217	CP0238	0.0611543	-0.0524523	DEMED East Alligator River	Janamba Muk Muk Mugalimba	DEMED East Alligator River_Janamba Muk Muk Mugalimba	0.767686	0	296.04
47665	CP0004	CP0225	0.0649021	-0.0476501	DEMED East Alligator River	Janamba Muk Muk Mugalimba	DEMED East Alligator River_Janamba Muk Muk Mugalimba	0.760696	0	296.04
50131	CP0230	CP0236	0.058877	-0.0476272	DEMED East Alligator River	Janamba Muk Muk Mugalimba	DEMED East Alligator River_Janamba Muk Muk Mugalimba	0.769489	0	296.04
45079	CP0003	CP0225	0.0651938	-0.0476114	DEMED East Alligator River	Janamba Muk Muk Mugalimba	DEMED East Alligator River_Janamba Muk Muk Mugalimba	0.757968	0	296.04
47700	CP0004	CP0237	0.0620855	-0.04701	DEMED East Alligator River	Janamba Muk Muk Mugalimba	DEMED East Alligator River_Janamba Muk Muk Mugalimba	0.758751	0	296.04
47711	CP0004	CP0238	0.0638221	-0.0468445	DEMED East Alligator River	Janamba Muk Muk Mugalimba	DEMED East Alligator River_Janamba Muk Muk Mugalimba	0.759899	0	296.04
51997	CP0217	CP0239	0.0580868	-0.0448856	DEMED East Alligator River	Janamba Muk Muk Mugalimba	DEMED East Alligator River_Janamba Muk Muk Mugalimba	0.781539	0	296.04
36714	CP0219	CP0225	0.0650524	-0.0393638	DEMED East Alligator River	Janamba Muk Muk Mugalimba	DEMED East Alligator River_Janamba Muk Muk Mugalimba	0.761746	0	296.04
45091	CP0003	CP0233	0.0620029	-0.0381703	DEMED East Alligator River	Janamba Muk Muk Mugalimba	DEMED East Alligator River_Janamba Muk Muk Mugalimba	0.753615	0	296.04
50107	CP0230	CP0225	0.0614495	-0.0368879	DEMED East Alligator River	Janamba Muk Muk Mugalimba	DEMED East Alligator River_Janamba Muk Muk Mugalimba	0.760257	0	296.04
33588	CP0218	CP0236	0.057304	-0.0356145	DEMED East Alligator River	Janamba Muk Muk Mugalimba	DEMED East Alligator River_Janamba Muk Muk Mugalimba	0.778243	0	296.04
50142	CP0230	CP0237	0.0626378	-0.0309295	DEMED East Alligator River	Janamba Muk Muk Mugalimba	DEMED East Alligator River_Janamba Muk Muk Mugalimba	0.758358	0	296.04
36760	CP0219	CP0238	0.0618241	-0.029599	DEMED East Alligator River	Janamba Muk Muk Mugalimba	DEMED East Alligator River_Janamba Muk Muk Mugalimba	0.761896	0	296.04
50119	CP0230	CP0233	0.0620491	-0.0269376	DEMED East Alligator River	Janamba Muk Muk Mugalimba	DEMED East Alligator River_Janamba Muk Muk Mugalimba	0.760372	0	296.04
45125	CP0003	CP0238	0.060513	-0.0248438	DEMED East Alligator River	Janamba Muk Muk Mugalimba	DEMED East Alligator River_Janamba Muk Muk Mugalimba	0.757135	0	296.04
36738	CP0219	CP0236	0.0524977	-0.0239325	DEMED East Alligator River	Janamba Muk Muk Mugalimba	DEMED East Alligator River_Janamba Muk Muk Mugalimba	0.776113	0	296.04
45114	CP0003	CP0237	0.0590616	-0.0231452	DEMED East Alligator River	Janamba Muk Muk Mugalimba	DEMED East Alligator River_Janamba Muk Muk Mugalimba	0.755474	0	296.04
50153	CP0230	CP0238	0.0562466	-0.0159077	DEMED East Alligator River	Janamba Muk Muk Mugalimba	DEMED East Alligator River_Janamba Muk Muk Mugalimba	0.758067	0	296.04
36749	CP0219	CP0237	0.056382	-0.0124021	DEMED East Alligator River	Janamba Muk Muk Mugalimba	DEMED East Alligator River_Janamba Muk Muk Mugalimba	0.768044	0	296.04
52044	CP0217	CP0233	0.0468863	-0.00817996	DEMED East Alligator River	Janamba Muk Muk Mugalimba	DEMED East Alligator River_Janamba Muk Muk Mugalimba	0.776973	0	296.04
33599	CP0218	CP0237	0.0470935	-0.00668543	DEMED East Alligator River	Janamba Muk Muk Mugalimba	DEMED East Alligator River_Janamba Muk Muk Mugalimba	0.782193	0	296.04
52067	CP0217	CP0237	0.0515654	0.00810904	DEMED East Alligator River	Janamba Muk Muk Mugalimba	DEMED East Alligator River_Janamba Muk Muk Mugalimba	0.789042	0	296.04
36726	CP0219	CP0233	0.052119	0.011806	DEMED East Alligator River	Janamba Muk Muk Mugalimba	DEMED East Alligator River_Janamba Muk Muk Mugalimba	0.776195	0	296.04
52020	CP0217	CP0220	0.0447383	0.0156021	DEMED East Alligator River	Janamba Muk Muk Mugalimba	DEMED East Alligator River_Janamba Muk Muk Mugalimba	0.805742	0	296.04
52056	CP0217	CP0236	0.0464904	0.0174018	DEMED East Alligator River	Janamba Muk Muk Mugalimba	DEMED East Alligator River_Janamba Muk Muk Mugalimba	0.791158	0	296.04
33552	CP0218	CP0220	0.0329054	0.0765568	DEMED East Alligator River	Janamba Muk Muk Mugalimba	DEMED East Alligator River_Janamba Muk Muk Mugalimba	0.823902	0	296.04
33675	CP0218	CP0240	0.103124	-0.346263	DEMED East Alligator River	Janamba Swim Creek Station	DEMED East Alligator River_Janamba Swim Creek Station	0.726838	0	119.373
36825	CP0219	CP0240	0.101515	-0.322731	DEMED East Alligator River	Janamba Swim Creek Station	DEMED East Alligator River_Janamba Swim Creek Station	0.735395	0	119.373
52143	CP0217	CP0240	0.0966516	-0.312805	DEMED East Alligator River	Janamba Swim Creek Station	DEMED East Alligator River_Janamba Swim Creek Station	0.734751	0	119.373
47776	CP0004	CP0240	0.0909913	-0.284553	DEMED East Alligator River	Janamba Swim Creek Station	DEMED East Alligator River_Janamba Swim Creek Station	0.74186	0	119.373
47985	CP0229	CP0240	0.0842372	-0.267437	DEMED East Alligator River	Janamba Swim Creek Station	DEMED East Alligator River_Janamba Swim Creek Station	0.742137	0	119.373
45190	CP0003	CP0240	0.0844027	-0.260958	DEMED East Alligator River	Janamba Swim Creek Station	DEMED East Alligator River_Janamba Swim Creek Station	0.745527	0	119.373
50218	CP0230	CP0240	0.0762849	-0.206037	DEMED East Alligator River	Janamba Swim Creek Station	DEMED East Alligator River_Janamba Swim Creek Station	0.762038	0	119.373
33640	CP0218	CP0226	0.0827548	-0.17942	DEMED East Alligator River	Janamba Swim Creek Station	DEMED East Alligator River_Janamba Swim Creek Station	0.72753	0	119.373
47950	CP0229	CP0226	0.0869724	-0.17808	DEMED East Alligator River	Janamba Swim Creek Station	DEMED East Alligator River_Janamba Swim Creek Station	0.726932	0	119.373
33697	CP0218	CP0009	0.0796236	-0.148958	DEMED East Alligator River	Janamba Swim Creek Station	DEMED East Alligator River_Janamba Swim Creek Station	0.741404	0	119.373
52108	CP0217	CP0226	0.0794435	-0.140528	DEMED East Alligator River	Janamba Swim Creek Station	DEMED East Alligator River_Janamba Swim Creek Station	0.737781	0	119.373
47741	CP0004	CP0226	0.0848263	-0.133671	DEMED East Alligator River	Janamba Swim Creek Station	DEMED East Alligator River_Janamba Swim Creek Station	0.730804	0	119.373
36790	CP0219	CP0226	0.0845943	-0.125561	DEMED East Alligator River	Janamba Swim Creek Station	DEMED East Alligator River_Janamba Swim Creek Station	0.728988	0	119.373
48007	CP0229	CP0009	0.0753487	-0.12405	DEMED East Alligator River	Janamba Swim Creek Station	DEMED East Alligator River_Janamba Swim Creek Station	0.748234	0	119.373
47798	CP0004	CP0009	0.0741345	-0.120779	DEMED East Alligator River	Janamba Swim Creek Station	DEMED East Alligator River_Janamba Swim Creek Station	0.747598	0	119.373
52165	CP0217	CP0009	0.0785274	-0.118982	DEMED East Alligator River	Janamba Swim Creek Station	DEMED East Alligator River_Janamba Swim Creek Station	0.752086	0	119.373
50240	CP0230	CP0009	0.074991	-0.11487	DEMED East Alligator River	Janamba Swim Creek Station	DEMED East Alligator River_Janamba Swim Creek Station	0.751446	0	119.373
33628	CP0218	CP0224	0.0731222	-0.114245	DEMED East Alligator River	Janamba Swim Creek Station	DEMED East Alligator River_Janamba Swim Creek Station	0.757828	0	119.373
36847	CP0219	CP0009	0.0729769	-0.114104	DEMED East Alligator River	Janamba Swim Creek Station	DEMED East Alligator River_Janamba Swim Creek Station	0.749729	0	119.373
33651	CP0218	CP0227	0.0742413	-0.113289	DEMED East Alligator River	Janamba Swim Creek Station	DEMED East Alligator River_Janamba Swim Creek Station	0.754967	0	119.373
33616	CP0218	CP0010	0.0715321	-0.113021	DEMED East Alligator River	Janamba Swim Creek Station	DEMED East Alligator River_Janamba Swim Creek Station	0.751811	0	119.373
45212	CP0003	CP0009	0.0700579	-0.107634	DEMED East Alligator River	Janamba Swim Creek Station	DEMED East Alligator River_Janamba Swim Creek Station	0.750181	0	119.373
33686	CP0218	CP0006	0.0700199	-0.105602	DEMED East Alligator River	Janamba Swim Creek Station	DEMED East Alligator River_Janamba Swim Creek Station	0.755111	0	119.373
52096	CP0217	CP0224	0.0696409	-0.0973592	DEMED East Alligator River	Janamba Swim Creek Station	DEMED East Alligator River_Janamba Swim Creek Station	0.76197	0	119.373
47926	CP0229	CP0010	0.0686719	-0.0953274	DEMED East Alligator River	Janamba Swim Creek Station	DEMED East Alligator River_Janamba Swim Creek Station	0.752401	0	119.373
45155	CP0003	CP0226	0.0719898	-0.0936498	DEMED East Alligator River	Janamba Swim Creek Station	DEMED East Alligator River_Janamba Swim Creek Station	0.733784	0	119.373
50171	CP0230	CP0224	0.0666546	-0.0924754	DEMED East Alligator River	Janamba Swim Creek Station	DEMED East Alligator River_Janamba Swim Creek Station	0.762283	0	119.373
50183	CP0230	CP0226	0.0760394	-0.0923669	DEMED East Alligator River	Janamba Swim Creek Station	DEMED East Alligator River_Janamba Swim Creek Station	0.739241	0	119.373
47938	CP0229	CP0224	0.0691403	-0.0896624	DEMED East Alligator River	Janamba Swim Creek Station	DEMED East Alligator River_Janamba Swim Creek Station	0.765611	0	119.373
33674	CP0218	CP0005	0.066498	-0.0881944	DEMED East Alligator River	Janamba Swim Creek Station	DEMED East Alligator River_Janamba Swim Creek Station	0.76039	0	119.373
33663	CP0218	CP0228	0.0654375	-0.0868585	DEMED East Alligator River	Janamba Swim Creek Station	DEMED East Alligator River_Janamba Swim Creek Station	0.75949	0	119.373
36778	CP0219	CP0224	0.0661008	-0.0828662	DEMED East Alligator River	Janamba Swim Creek Station	DEMED East Alligator River_Janamba Swim Creek Station	0.765667	0	119.373
47996	CP0229	CP0006	0.0676923	-0.082367	DEMED East Alligator River	Janamba Swim Creek Station	DEMED East Alligator River_Janamba Swim Creek Station	0.758643	0	119.373
52084	CP0217	CP0010	0.0698603	-0.0822503	DEMED East Alligator River	Janamba Swim Creek Station	DEMED East Alligator River_Janamba Swim Creek Station	0.760933	0	119.373
52131	CP0217	CP0228	0.0639377	-0.0757679	DEMED East Alligator River	Janamba Swim Creek Station	DEMED East Alligator River_Janamba Swim Creek Station	0.758377	0	119.373
47717	CP0004	CP0010	0.0685403	-0.0749337	DEMED East Alligator River	Janamba Swim Creek Station	DEMED East Alligator River_Janamba Swim Creek Station	0.754125	0	119.373
47729	CP0004	CP0224	0.0628737	-0.0733945	DEMED East Alligator River	Janamba Swim Creek Station	DEMED East Alligator River_Janamba Swim Creek Station	0.768436	0	119.373
47984	CP0229	CP0005	0.0640145	-0.0720137	DEMED East Alligator River	Janamba Swim Creek Station	DEMED East Alligator River_Janamba Swim Creek Station	0.76094	0	119.373
52154	CP0217	CP0006	0.0658086	-0.0719904	DEMED East Alligator River	Janamba Swim Creek Station	DEMED East Alligator River_Janamba Swim Creek Station	0.7626	0	119.373
47961	CP0229	CP0227	0.0617998	-0.0658611	DEMED East Alligator River	Janamba Swim Creek Station	DEMED East Alligator River_Janamba Swim Creek Station	0.761384	0	119.373
47973	CP0229	CP0228	0.0623983	-0.0653138	DEMED East Alligator River	Janamba Swim Creek Station	DEMED East Alligator River_Janamba Swim Creek Station	0.762615	0	119.373
50159	CP0230	CP0010	0.0656182	-0.0651455	DEMED East Alligator River	Janamba Swim Creek Station	DEMED East Alligator River_Janamba Swim Creek Station	0.756688	0	119.373
36766	CP0219	CP0010	0.0670522	-0.0645641	DEMED East Alligator River	Janamba Swim Creek Station	DEMED East Alligator River_Janamba Swim Creek Station	0.758088	0	119.373
45131	CP0003	CP0010	0.0619565	-0.0625414	DEMED East Alligator River	Janamba Swim Creek Station	DEMED East Alligator River_Janamba Swim Creek Station	0.753986	0	119.373
52142	CP0217	CP0005	0.0611986	-0.058663	DEMED East Alligator River	Janamba Swim Creek Station	DEMED East Alligator River_Janamba Swim Creek Station	0.764621	0	119.373
45143	CP0003	CP0224	0.0561188	-0.0564346	DEMED East Alligator River	Janamba Swim Creek Station	DEMED East Alligator River_Janamba Swim Creek Station	0.769642	0	119.373
52119	CP0217	CP0227	0.0613464	-0.0517065	DEMED East Alligator River	Janamba Swim Creek Station	DEMED East Alligator River_Janamba Swim Creek Station	0.76882	0	119.373
36813	CP0219	CP0228	0.0624211	-0.0463376	DEMED East Alligator River	Janamba Swim Creek Station	DEMED East Alligator River_Janamba Swim Creek Station	0.752932	0	119.373
47764	CP0004	CP0228	0.063337	-0.0375572	DEMED East Alligator River	Janamba Swim Creek Station	DEMED East Alligator River_Janamba Swim Creek Station	0.765472	0	119.373
47752	CP0004	CP0227	0.0611433	-0.0361328	DEMED East Alligator River	Janamba Swim Creek Station	DEMED East Alligator River_Janamba Swim Creek Station	0.763205	0	119.373
36801	CP0219	CP0227	0.0663422	-0.0357827	DEMED East Alligator River	Janamba Swim Creek Station	DEMED East Alligator River_Janamba Swim Creek Station	0.764017	0	119.373
47787	CP0004	CP0006	0.0576087	-0.0322686	DEMED East Alligator River	Janamba Swim Creek Station	DEMED East Alligator River_Janamba Swim Creek Station	0.761775	0	119.373
36836	CP0219	CP0006	0.0630191	-0.0282748	DEMED East Alligator River	Janamba Swim Creek Station	DEMED East Alligator River_Janamba Swim Creek Station	0.764446	0	119.373
36824	CP0219	CP0005	0.0611472	-0.027707	DEMED East Alligator River	Janamba Swim Creek Station	DEMED East Alligator River_Janamba Swim Creek Station	0.762266	0	119.373
50206	CP0230	CP0228	0.0602562	-0.0235759	DEMED East Alligator River	Janamba Swim Creek Station	DEMED East Alligator River_Janamba Swim Creek Station	0.761772	0	119.373
50229	CP0230	CP0006	0.0576124	-0.0173546	DEMED East Alligator River	Janamba Swim Creek Station	DEMED East Alligator River_Janamba Swim Creek Station	0.758804	0	119.373
47775	CP0004	CP0005	0.0570033	-0.0167643	DEMED East Alligator River	Janamba Swim Creek Station	DEMED East Alligator River_Janamba Swim Creek Station	0.769725	0	119.373
50194	CP0230	CP0227	0.058431	-0.0166028	DEMED East Alligator River	Janamba Swim Creek Station	DEMED East Alligator River_Janamba Swim Creek Station	0.766637	0	119.373
50217	CP0230	CP0005	0.0593541	-0.0137672	DEMED East Alligator River	Janamba Swim Creek Station	DEMED East Alligator River_Janamba Swim Creek Station	0.763125	0	119.373
45166	CP0003	CP0227	0.0522321	-0.00160154	DEMED East Alligator River	Janamba Swim Creek Station	DEMED East Alligator River_Janamba Swim Creek Station	0.769203	0	119.373
45178	CP0003	CP0228	0.0549729	0.00300823	DEMED East Alligator River	Janamba Swim Creek Station	DEMED East Alligator River_Janamba Swim Creek Station	0.771157	0	119.373
45201	CP0003	CP0006	0.0506696	0.00439147	DEMED East Alligator River	Janamba Swim Creek Station	DEMED East Alligator River_Janamba Swim Creek Station	0.764748	0	119.373
45189	CP0003	CP0005	0.0473694	0.0399186	DEMED East Alligator River	Janamba Swim Creek Station	DEMED East Alligator River_Janamba Swim Creek Station	0.781685	0	119.373
33511	CP0218	CP0398	0.0743146	-0.116065	DEMED East Alligator River	Walker Beatrice Hill Station	DEMED East Alligator River_Walker Beatrice Hill Station	0.754058	0	187.499
47821	CP0229	CP0398	0.0693141	-0.0879346	DEMED East Alligator River	Walker Beatrice Hill Station	DEMED East Alligator River_Walker Beatrice Hill Station	0.757942	0	187.499
36661	CP0219	CP0398	0.0691394	-0.0628255	DEMED East Alligator River	Walker Beatrice Hill Station	DEMED East Alligator River_Walker Beatrice Hill Station	0.757832	0	187.499
33453	CP0218	CP0206	0.0571789	-0.0605062	DEMED East Alligator River	Walker Beatrice Hill Station	DEMED East Alligator River_Walker Beatrice Hill Station	0.765602	0	187.499
47612	CP0004	CP0398	0.0634032	-0.0502291	DEMED East Alligator River	Walker Beatrice Hill Station	DEMED East Alligator River_Walker Beatrice Hill Station	0.759664	0	187.499
50054	CP0230	CP0398	0.0612282	-0.0381107	DEMED East Alligator River	Walker Beatrice Hill Station	DEMED East Alligator River_Walker Beatrice Hill Station	0.763731	0	187.499
45026	CP0003	CP0398	0.0590146	-0.0323318	DEMED East Alligator River	Walker Beatrice Hill Station	DEMED East Alligator River_Walker Beatrice Hill Station	0.764844	0	187.499
36603	CP0219	CP0206	0.0592259	-0.0181529	DEMED East Alligator River	Walker Beatrice Hill Station	DEMED East Alligator River_Walker Beatrice Hill Station	0.766337	0	187.499
33489	CP0218	CP0296	0.0613165	-0.0856449	DEMED East Alligator River	WHNT Adelaide River Station	DEMED East Alligator River_WHNT Adelaide River Station	0.756718	0	190.512
33449	CP0218	CP0177	0.0582507	-0.0837379	DEMED East Alligator River	WHNT Adelaide River Station	DEMED East Alligator River_WHNT Adelaide River Station	0.754644	0	190.512
36639	CP0219	CP0296	0.0622862	-0.0427799	DEMED East Alligator River	WHNT Adelaide River Station	DEMED East Alligator River_WHNT Adelaide River Station	0.755086	0	190.512
36599	CP0219	CP0177	0.0613751	-0.037349	DEMED East Alligator River	WHNT Adelaide River Station	DEMED East Alligator River_WHNT Adelaide River Station	0.757109	0	190.512
45004	CP0003	CP0296	0.0534103	-0.005	DEMED East Alligator River	WHNT Adelaide River Station	DEMED East Alligator River_WHNT Adelaide River Station	0.761819	0	190.512
33481	CP0218	CP0181	0.171062	-8.40753	DEMED East Alligator River	WHNT Arafura Swamp Darbilla Creek	DEMED East Alligator River_WHNT Arafura Swamp Darbilla Creek	0.694689	1	243.967
36631	CP0219	CP0181	0.16365	-8.28912	DEMED East Alligator River	WHNT Arafura Swamp Darbilla Creek	DEMED East Alligator River_WHNT Arafura Swamp Darbilla Creek	0.691168	1	243.967
47603	CP0004	CP0065	0.0960162	-0.289328	DEMED East Alligator River	WHNT Arafura Swamp Darbilla Creek	DEMED East Alligator River_WHNT Arafura Swamp Darbilla Creek	0.729392	1	243.967
45017	CP0003	CP0065	0.0933774	-0.288462	DEMED East Alligator River	WHNT Arafura Swamp Darbilla Creek	DEMED East Alligator River_WHNT Arafura Swamp Darbilla Creek	0.728582	1	243.967
33466	CP0218	CP0026	0.103342	-0.287879	DEMED East Alligator River	WHNT Arafura Swamp Darbilla Creek	DEMED East Alligator River_WHNT Arafura Swamp Darbilla Creek	0.718157	1	243.967
47812	CP0229	CP0065	0.0955437	-0.286986	DEMED East Alligator River	WHNT Arafura Swamp Darbilla Creek	DEMED East Alligator River_WHNT Arafura Swamp Darbilla Creek	0.730699	1	243.967
33502	CP0218	CP0065	0.0970286	-0.285742	DEMED East Alligator River	WHNT Arafura Swamp Darbilla Creek	DEMED East Alligator River_WHNT Arafura Swamp Darbilla Creek	0.732117	1	243.967
36616	CP0219	CP0026	0.0939416	-0.263459	DEMED East Alligator River	WHNT Arafura Swamp Darbilla Creek	DEMED East Alligator River_WHNT Arafura Swamp Darbilla Creek	0.720609	1	243.967
36652	CP0219	CP0065	0.088413	-0.258689	DEMED East Alligator River	WHNT Arafura Swamp Darbilla Creek	DEMED East Alligator River_WHNT Arafura Swamp Darbilla Creek	0.736775	1	243.967
33512	CP0218	CP0040	0.101305	-0.24819	DEMED East Alligator River	WHNT Arafura Swamp Darbilla Creek	DEMED East Alligator River_WHNT Arafura Swamp Darbilla Creek	0.726803	1	243.967
33480	CP0218	CP0163	0.103948	-0.243989	DEMED East Alligator River	WHNT Arafura Swamp Darbilla Creek	DEMED East Alligator River_WHNT Arafura Swamp Darbilla Creek	0.722926	1	243.967
47613	CP0004	CP0040	0.0945039	-0.242935	DEMED East Alligator River	WHNT Arafura Swamp Darbilla Creek	DEMED East Alligator River_WHNT Arafura Swamp Darbilla Creek	0.722565	1	243.967
33468	CP0218	CP0077	0.0994215	-0.232456	DEMED East Alligator River	WHNT Arafura Swamp Darbilla Creek	DEMED East Alligator River_WHNT Arafura Swamp Darbilla Creek	0.722072	1	243.967
47822	CP0229	CP0040	0.0942883	-0.232415	DEMED East Alligator River	WHNT Arafura Swamp Darbilla Creek	DEMED East Alligator River_WHNT Arafura Swamp Darbilla Creek	0.728015	1	243.967
33445	CP0218	CP0174	0.0976186	-0.231651	DEMED East Alligator River	WHNT Arafura Swamp Darbilla Creek	DEMED East Alligator River_WHNT Arafura Swamp Darbilla Creek	0.720687	1	243.967
50055	CP0230	CP0040	0.0882779	-0.22377	DEMED East Alligator River	WHNT Arafura Swamp Darbilla Creek	DEMED East Alligator River_WHNT Arafura Swamp Darbilla Creek	0.726393	1	243.967
33444	CP0218	CP0075	0.0947464	-0.223435	DEMED East Alligator River	WHNT Arafura Swamp Darbilla Creek	DEMED East Alligator River_WHNT Arafura Swamp Darbilla Creek	0.734601	1	243.967
45027	CP0003	CP0040	0.0852067	-0.214597	DEMED East Alligator River	WHNT Arafura Swamp Darbilla Creek	DEMED East Alligator River_WHNT Arafura Swamp Darbilla Creek	0.728426	1	243.967
47617	CP0004	CP0285	0.0953156	-0.213123	DEMED East Alligator River	WHNT Arafura Swamp Darbilla Creek	DEMED East Alligator River_WHNT Arafura Swamp Darbilla Creek	0.722825	1	243.967
33479	CP0218	CP0055	0.0987699	-0.209245	DEMED East Alligator River	WHNT Arafura Swamp Darbilla Creek	DEMED East Alligator River_WHNT Arafura Swamp Darbilla Creek	0.735166	1	243.967
33503	CP0218	CP0168	0.0953156	-0.208921	DEMED East Alligator River	WHNT Arafura Swamp Darbilla Creek	DEMED East Alligator River_WHNT Arafura Swamp Darbilla Creek	0.731687	1	243.967
36662	CP0219	CP0040	0.088081	-0.208545	DEMED East Alligator River	WHNT Arafura Swamp Darbilla Creek	DEMED East Alligator River_WHNT Arafura Swamp Darbilla Creek	0.734129	1	243.967
36629	CP0219	CP0055	0.0951607	-0.207746	DEMED East Alligator River	WHNT Arafura Swamp Darbilla Creek	DEMED East Alligator River_WHNT Arafura Swamp Darbilla Creek	0.732214	1	243.967
33491	CP0218	CP0063	0.0908927	-0.200704	DEMED East Alligator River	WHNT Arafura Swamp Darbilla Creek	DEMED East Alligator River_WHNT Arafura Swamp Darbilla Creek	0.731297	1	243.967
36618	CP0219	CP0077	0.0869565	-0.197507	DEMED East Alligator River	WHNT Arafura Swamp Darbilla Creek	DEMED East Alligator River_WHNT Arafura Swamp Darbilla Creek	0.728577	1	243.967
33447	CP0218	CP0288	0.0893986	-0.193963	DEMED East Alligator River	WHNT Arafura Swamp Darbilla Creek	DEMED East Alligator River_WHNT Arafura Swamp Darbilla Creek	0.728192	1	243.967
36630	CP0219	CP0163	0.0901862	-0.193816	DEMED East Alligator River	WHNT Arafura Swamp Darbilla Creek	DEMED East Alligator River_WHNT Arafura Swamp Darbilla Creek	0.735315	1	243.967
33494	CP0218	CP0278	0.0923383	-0.193001	DEMED East Alligator River	WHNT Arafura Swamp Darbilla Creek	DEMED East Alligator River_WHNT Arafura Swamp Darbilla Creek	0.730936	1	243.967
47604	CP0004	CP0168	0.0867125	-0.189844	DEMED East Alligator River	WHNT Arafura Swamp Darbilla Creek	DEMED East Alligator River_WHNT Arafura Swamp Darbilla Creek	0.733798	1	243.967
45031	CP0003	CP0285	0.0863751	-0.188578	DEMED East Alligator River	WHNT Arafura Swamp Darbilla Creek	DEMED East Alligator River_WHNT Arafura Swamp Darbilla Creek	0.725786	1	243.967
33455	CP0218	CP0047	0.0858175	-0.187326	DEMED East Alligator River	WHNT Arafura Swamp Darbilla Creek	DEMED East Alligator River_WHNT Arafura Swamp Darbilla Creek	0.728184	1	243.967
33493	CP0218	CP0182	0.0896602	-0.183472	DEMED East Alligator River	WHNT Arafura Swamp Darbilla Creek	DEMED East Alligator River_WHNT Arafura Swamp Darbilla Creek	0.733098	1	243.967
33516	CP0218	CP0285	0.0926494	-0.182986	DEMED East Alligator River	WHNT Arafura Swamp Darbilla Creek	DEMED East Alligator River_WHNT Arafura Swamp Darbilla Creek	0.737403	1	243.967
47811	CP0229	CP0031	0.0841915	-0.179326	DEMED East Alligator River	WHNT Arafura Swamp Darbilla Creek	DEMED East Alligator River_WHNT Arafura Swamp Darbilla Creek	0.723848	1	243.967
33470	CP0218	CP0273	0.0862788	-0.173211	DEMED East Alligator River	WHNT Arafura Swamp Darbilla Creek	DEMED East Alligator River_WHNT Arafura Swamp Darbilla Creek	0.735092	1	243.967
45018	CP0003	CP0168	0.0812229	-0.172669	DEMED East Alligator River	WHNT Arafura Swamp Darbilla Creek	DEMED East Alligator River_WHNT Arafura Swamp Darbilla Creek	0.736614	1	243.967
45008	CP0003	CP0182	0.0844485	-0.172272	DEMED East Alligator River	WHNT Arafura Swamp Darbilla Creek	DEMED East Alligator River_WHNT Arafura Swamp Darbilla Creek	0.730199	1	243.967
33490	CP0218	CP0028	0.082837	-0.170478	DEMED East Alligator River	WHNT Arafura Swamp Darbilla Creek	DEMED East Alligator River_WHNT Arafura Swamp Darbilla Creek	0.733622	1	243.967
47813	CP0229	CP0168	0.0837857	-0.170028	DEMED East Alligator River	WHNT Arafura Swamp Darbilla Creek	DEMED East Alligator River_WHNT Arafura Swamp Darbilla Creek	0.741133	1	243.967
47826	CP0229	CP0285	0.0827761	-0.169316	DEMED East Alligator River	WHNT Arafura Swamp Darbilla Creek	DEMED East Alligator River_WHNT Arafura Swamp Darbilla Creek	0.732695	1	243.967
36643	CP0219	CP0182	0.0848069	-0.169057	DEMED East Alligator River	WHNT Arafura Swamp Darbilla Creek	DEMED East Alligator River_WHNT Arafura Swamp Darbilla Creek	0.731324	1	243.967
33467	CP0218	CP0051	0.0818428	-0.167592	DEMED East Alligator River	WHNT Arafura Swamp Darbilla Creek	DEMED East Alligator River_WHNT Arafura Swamp Darbilla Creek	0.734237	1	243.967
33446	CP0218	CP0267	0.0830318	-0.167189	DEMED East Alligator River	WHNT Arafura Swamp Darbilla Creek	DEMED East Alligator River_WHNT Arafura Swamp Darbilla Creek	0.736161	1	243.967
45006	CP0003	CP0063	0.0818872	-0.166432	DEMED East Alligator River	WHNT Arafura Swamp Darbilla Creek	DEMED East Alligator River_WHNT Arafura Swamp Darbilla Creek	0.740239	1	243.967
50059	CP0230	CP0285	0.0827624	-0.166322	DEMED East Alligator River	WHNT Arafura Swamp Darbilla Creek	DEMED East Alligator River_WHNT Arafura Swamp Darbilla Creek	0.734583	1	243.967
33513	CP0218	CP0070	0.076034	-0.159674	DEMED East Alligator River	WHNT Arafura Swamp Darbilla Creek	DEMED East Alligator River_WHNT Arafura Swamp Darbilla Creek	0.732436	1	243.967
45009	CP0003	CP0278	0.0849602	-0.158798	DEMED East Alligator River	WHNT Arafura Swamp Darbilla Creek	DEMED East Alligator River_WHNT Arafura Swamp Darbilla Creek	0.734364	1	243.967
33456	CP0218	CP0076	0.08	-0.158426	DEMED East Alligator River	WHNT Arafura Swamp Darbilla Creek	DEMED East Alligator River_WHNT Arafura Swamp Darbilla Creek	0.737738	1	243.967
33501	CP0218	CP0031	0.0803539	-0.157876	DEMED East Alligator River	WHNT Arafura Swamp Darbilla Creek	DEMED East Alligator River_WHNT Arafura Swamp Darbilla Creek	0.737992	1	243.967
33458	CP0218	CP0271	0.0833032	-0.157703	DEMED East Alligator River	WHNT Arafura Swamp Darbilla Creek	DEMED East Alligator River_WHNT Arafura Swamp Darbilla Creek	0.74004	1	243.967
33469	CP0218	CP0180	0.0810713	-0.156142	DEMED East Alligator River	WHNT Arafura Swamp Darbilla Creek	DEMED East Alligator River_WHNT Arafura Swamp Darbilla Creek	0.738871	1	243.967
36641	CP0219	CP0063	0.0752029	-0.155876	DEMED East Alligator River	WHNT Arafura Swamp Darbilla Creek	DEMED East Alligator River_WHNT Arafura Swamp Darbilla Creek	0.739044	1	243.967
33482	CP0218	CP0275	0.0758684	-0.155571	DEMED East Alligator River	WHNT Arafura Swamp Darbilla Creek	DEMED East Alligator River_WHNT Arafura Swamp Darbilla Creek	0.733821	1	243.967
36666	CP0219	CP0285	0.0813052	-0.152759	DEMED East Alligator River	WHNT Arafura Swamp Darbilla Creek	DEMED East Alligator River_WHNT Arafura Swamp Darbilla Creek	0.74004	1	243.967
33459	CP0218	CP0291	0.0829118	-0.148405	DEMED East Alligator River	WHNT Arafura Swamp Darbilla Creek	DEMED East Alligator River_WHNT Arafura Swamp Darbilla Creek	0.745123	1	243.967
33457	CP0218	CP0175	0.0786761	-0.144325	DEMED East Alligator River	WHNT Arafura Swamp Darbilla Creek	DEMED East Alligator River_WHNT Arafura Swamp Darbilla Creek	0.743986	1	243.967
47824	CP0229	CP0172	0.0748508	-0.14215	DEMED East Alligator River	WHNT Arafura Swamp Darbilla Creek	DEMED East Alligator River_WHNT Arafura Swamp Darbilla Creek	0.734677	1	243.967
36644	CP0219	CP0278	0.0798918	-0.141497	DEMED East Alligator River	WHNT Arafura Swamp Darbilla Creek	DEMED East Alligator River_WHNT Arafura Swamp Darbilla Creek	0.739766	1	243.967
33505	CP0218	CP0281	0.0777577	-0.141319	DEMED East Alligator River	WHNT Arafura Swamp Darbilla Creek	DEMED East Alligator River_WHNT Arafura Swamp Darbilla Creek	0.743761	1	243.967
33492	CP0218	CP0166	0.0763814	-0.137596	DEMED East Alligator River	WHNT Arafura Swamp Darbilla Creek	DEMED East Alligator River_WHNT Arafura Swamp Darbilla Creek	0.745034	1	243.967
47602	CP0004	CP0031	0.0844332	-0.132812	DEMED East Alligator River	WHNT Arafura Swamp Darbilla Creek	DEMED East Alligator River_WHNT Arafura Swamp Darbilla Creek	0.73296	1	243.967
33514	CP0218	CP0172	0.0715576	-0.12665	DEMED East Alligator River	WHNT Arafura Swamp Darbilla Creek	DEMED East Alligator River_WHNT Arafura Swamp Darbilla Creek	0.745663	1	243.967
36608	CP0219	CP0271	0.0779103	-0.126157	DEMED East Alligator River	WHNT Arafura Swamp Darbilla Creek	DEMED East Alligator River_WHNT Arafura Swamp Darbilla Creek	0.735629	1	243.967
36653	CP0219	CP0168	0.0738267	-0.126145	DEMED East Alligator River	WHNT Arafura Swamp Darbilla Creek	DEMED East Alligator River_WHNT Arafura Swamp Darbilla Creek	0.753069	1	243.967
33515	CP0218	CP0184	0.0723851	-0.125954	DEMED East Alligator River	WHNT Arafura Swamp Darbilla Creek	DEMED East Alligator River_WHNT Arafura Swamp Darbilla Creek	0.745928	1	243.967
33504	CP0218	CP0183	0.0751174	-0.123266	DEMED East Alligator River	WHNT Arafura Swamp Darbilla Creek	DEMED East Alligator River_WHNT Arafura Swamp Darbilla Creek	0.750542	1	243.967
47814	CP0229	CP0183	0.0731707	-0.122442	DEMED East Alligator River	WHNT Arafura Swamp Darbilla Creek	DEMED East Alligator River_WHNT Arafura Swamp Darbilla Creek	0.743451	1	243.967
33443	CP0218	CP0045	0.0709258	-0.120755	DEMED East Alligator River	WHNT Arafura Swamp Darbilla Creek	DEMED East Alligator River_WHNT Arafura Swamp Darbilla Creek	0.747609	1	243.967
36609	CP0219	CP0291	0.0757303	-0.119725	DEMED East Alligator River	WHNT Arafura Swamp Darbilla Creek	DEMED East Alligator River_WHNT Arafura Swamp Darbilla Creek	0.742066	1	243.967
47825	CP0229	CP0184	0.0717002	-0.11895	DEMED East Alligator River	WHNT Arafura Swamp Darbilla Creek	DEMED East Alligator River_WHNT Arafura Swamp Darbilla Creek	0.742893	1	243.967
36619	CP0219	CP0180	0.0780206	-0.111967	DEMED East Alligator River	WHNT Arafura Swamp Darbilla Creek	DEMED East Alligator River_WHNT Arafura Swamp Darbilla Creek	0.740925	1	243.967
36606	CP0219	CP0076	0.0793135	-0.110721	DEMED East Alligator River	WHNT Arafura Swamp Darbilla Creek	DEMED East Alligator River_WHNT Arafura Swamp Darbilla Creek	0.733514	1	243.967
36605	CP0219	CP0047	0.0780743	-0.109283	DEMED East Alligator River	WHNT Arafura Swamp Darbilla Creek	DEMED East Alligator River_WHNT Arafura Swamp Darbilla Creek	0.740804	1	243.967
36651	CP0219	CP0031	0.0787529	-0.10621	DEMED East Alligator River	WHNT Arafura Swamp Darbilla Creek	DEMED East Alligator River_WHNT Arafura Swamp Darbilla Creek	0.735718	1	243.967
47815	CP0229	CP0281	0.0667511	-0.104707	DEMED East Alligator River	WHNT Arafura Swamp Darbilla Creek	DEMED East Alligator River_WHNT Arafura Swamp Darbilla Creek	0.74602	1	243.967
36620	CP0219	CP0273	0.081267	-0.103129	DEMED East Alligator River	WHNT Arafura Swamp Darbilla Creek	DEMED East Alligator River_WHNT Arafura Swamp Darbilla Creek	0.739367	1	243.967
47823	CP0229	CP0070	0.064691	-0.0995228	DEMED East Alligator River	WHNT Arafura Swamp Darbilla Creek	DEMED East Alligator River_WHNT Arafura Swamp Darbilla Creek	0.746838	1	243.967
36617	CP0219	CP0051	0.0787955	-0.0960064	DEMED East Alligator River	WHNT Arafura Swamp Darbilla Creek	DEMED East Alligator River_WHNT Arafura Swamp Darbilla Creek	0.742427	1	243.967
47606	CP0004	CP0281	0.070601	-0.0956026	DEMED East Alligator River	WHNT Arafura Swamp Darbilla Creek	DEMED East Alligator River_WHNT Arafura Swamp Darbilla Creek	0.739591	1	243.967
47614	CP0004	CP0070	0.0707052	-0.0945023	DEMED East Alligator River	WHNT Arafura Swamp Darbilla Creek	DEMED East Alligator River_WHNT Arafura Swamp Darbilla Creek	0.740235	1	243.967
45016	CP0003	CP0031	0.0765896	-0.0938086	DEMED East Alligator River	WHNT Arafura Swamp Darbilla Creek	DEMED East Alligator River_WHNT Arafura Swamp Darbilla Creek	0.733562	1	243.967
33478	CP0218	CP0027	0.0573697	-0.0932732	DEMED East Alligator River	WHNT Arafura Swamp Darbilla Creek	DEMED East Alligator River_WHNT Arafura Swamp Darbilla Creek	0.748692	1	243.967
47615	CP0004	CP0172	0.0716353	-0.0885993	DEMED East Alligator River	WHNT Arafura Swamp Darbilla Creek	DEMED East Alligator River_WHNT Arafura Swamp Darbilla Creek	0.744754	1	243.967
36632	CP0219	CP0275	0.0695509	-0.0874273	DEMED East Alligator River	WHNT Arafura Swamp Darbilla Creek	DEMED East Alligator River_WHNT Arafura Swamp Darbilla Creek	0.737769	1	243.967
45005	CP0003	CP0028	0.0790756	-0.0848968	DEMED East Alligator River	WHNT Arafura Swamp Darbilla Creek	DEMED East Alligator River_WHNT Arafura Swamp Darbilla Creek	0.741379	1	243.967
47616	CP0004	CP0184	0.0713897	-0.0838773	DEMED East Alligator River	WHNT Arafura Swamp Darbilla Creek	DEMED East Alligator River_WHNT Arafura Swamp Darbilla Creek	0.747237	1	243.967
47605	CP0004	CP0183	0.0732104	-0.0830624	DEMED East Alligator River	WHNT Arafura Swamp Darbilla Creek	DEMED East Alligator River_WHNT Arafura Swamp Darbilla Creek	0.749006	1	243.967
36607	CP0219	CP0175	0.0758123	-0.0830084	DEMED East Alligator River	WHNT Arafura Swamp Darbilla Creek	DEMED East Alligator River_WHNT Arafura Swamp Darbilla Creek	0.751895	1	243.967
36642	CP0219	CP0166	0.0702829	-0.0813138	DEMED East Alligator River	WHNT Arafura Swamp Darbilla Creek	DEMED East Alligator River_WHNT Arafura Swamp Darbilla Creek	0.741755	1	243.967
36654	CP0219	CP0183	0.0708236	-0.0732484	DEMED East Alligator River	WHNT Arafura Swamp Darbilla Creek	DEMED East Alligator River_WHNT Arafura Swamp Darbilla Creek	0.746441	1	243.967
45029	CP0003	CP0172	0.0710541	-0.0619912	DEMED East Alligator River	WHNT Arafura Swamp Darbilla Creek	DEMED East Alligator River_WHNT Arafura Swamp Darbilla Creek	0.74652	1	243.967
36665	CP0219	CP0184	0.067365	-0.0618228	DEMED East Alligator River	WHNT Arafura Swamp Darbilla Creek	DEMED East Alligator River_WHNT Arafura Swamp Darbilla Creek	0.748962	1	243.967
50056	CP0230	CP0070	0.0670633	-0.0610175	DEMED East Alligator River	WHNT Arafura Swamp Darbilla Creek	DEMED East Alligator River_WHNT Arafura Swamp Darbilla Creek	0.743014	1	243.967
36664	CP0219	CP0172	0.0701533	-0.0609056	DEMED East Alligator River	WHNT Arafura Swamp Darbilla Creek	DEMED East Alligator River_WHNT Arafura Swamp Darbilla Creek	0.752931	1	243.967
36663	CP0219	CP0070	0.0650685	-0.0574475	DEMED East Alligator River	WHNT Arafura Swamp Darbilla Creek	DEMED East Alligator River_WHNT Arafura Swamp Darbilla Creek	0.749369	1	243.967
45028	CP0003	CP0070	0.0652213	-0.0562149	DEMED East Alligator River	WHNT Arafura Swamp Darbilla Creek	DEMED East Alligator River_WHNT Arafura Swamp Darbilla Creek	0.743451	1	243.967
36655	CP0219	CP0281	0.0671359	-0.056051	DEMED East Alligator River	WHNT Arafura Swamp Darbilla Creek	DEMED East Alligator River_WHNT Arafura Swamp Darbilla Creek	0.75203	1	243.967
50057	CP0230	CP0172	0.0689157	-0.0553125	DEMED East Alligator River	WHNT Arafura Swamp Darbilla Creek	DEMED East Alligator River_WHNT Arafura Swamp Darbilla Creek	0.748331	1	243.967
36640	CP0219	CP0028	0.065562	-0.0535601	DEMED East Alligator River	WHNT Arafura Swamp Darbilla Creek	DEMED East Alligator River_WHNT Arafura Swamp Darbilla Creek	0.751891	1	243.967
50058	CP0230	CP0184	0.0662934	-0.0520638	DEMED East Alligator River	WHNT Arafura Swamp Darbilla Creek	DEMED East Alligator River_WHNT Arafura Swamp Darbilla Creek	0.747381	1	243.967
45019	CP0003	CP0183	0.0650289	-0.0462789	DEMED East Alligator River	WHNT Arafura Swamp Darbilla Creek	DEMED East Alligator River_WHNT Arafura Swamp Darbilla Creek	0.749458	1	243.967
45007	CP0003	CP0166	0.0646676	-0.0440901	DEMED East Alligator River	WHNT Arafura Swamp Darbilla Creek	DEMED East Alligator River_WHNT Arafura Swamp Darbilla Creek	0.750361	1	243.967
45020	CP0003	CP0281	0.0653039	-0.0438322	DEMED East Alligator River	WHNT Arafura Swamp Darbilla Creek	DEMED East Alligator River_WHNT Arafura Swamp Darbilla Creek	0.751085	1	243.967
45030	CP0003	CP0184	0.0629978	-0.0378217	DEMED East Alligator River	WHNT Arafura Swamp Darbilla Creek	DEMED East Alligator River_WHNT Arafura Swamp Darbilla Creek	0.752806	1	243.967
36628	CP0219	CP0027	0.0523947	-0.0337365	DEMED East Alligator River	WHNT Arafura Swamp Darbilla Creek	DEMED East Alligator River_WHNT Arafura Swamp Darbilla Creek	0.75045	1	243.967
47910	CP0229	CP0252	0.0689094	-0.0912347	DEMED East Alligator River	WHNT Elizabeth Downs Station	DEMED East Alligator River_WHNT Elizabeth Downs Station	0.755381	0	328.43
47908	CP0229	CP0179	0.068149	-0.0888965	DEMED East Alligator River	WHNT Elizabeth Downs Station	DEMED East Alligator River_WHNT Elizabeth Downs Station	0.755604	0	328.43
47699	CP0004	CP0179	0.0654967	-0.0637483	DEMED East Alligator River	WHNT Elizabeth Downs Station	DEMED East Alligator River_WHNT Elizabeth Downs Station	0.759092	0	328.43
50143	CP0230	CP0252	0.0626128	-0.0609915	DEMED East Alligator River	WHNT Elizabeth Downs Station	DEMED East Alligator River_WHNT Elizabeth Downs Station	0.752256	0	328.43
36748	CP0219	CP0179	0.0622182	-0.060259	DEMED East Alligator River	WHNT Elizabeth Downs Station	DEMED East Alligator River_WHNT Elizabeth Downs Station	0.75789	0	328.43
45113	CP0003	CP0179	0.0616414	-0.0597537	DEMED East Alligator River	WHNT Elizabeth Downs Station	DEMED East Alligator River_WHNT Elizabeth Downs Station	0.757683	0	328.43
33598	CP0218	CP0179	0.0589086	-0.0583853	DEMED East Alligator River	WHNT Elizabeth Downs Station	DEMED East Alligator River_WHNT Elizabeth Downs Station	0.767709	0	328.43
45115	CP0003	CP0252	0.0660036	-0.0511811	DEMED East Alligator River	WHNT Elizabeth Downs Station	DEMED East Alligator River_WHNT Elizabeth Downs Station	0.762206	0	328.43
47701	CP0004	CP0252	0.0640608	-0.0501634	DEMED East Alligator River	WHNT Elizabeth Downs Station	DEMED East Alligator River_WHNT Elizabeth Downs Station	0.75941	0	328.43
50141	CP0230	CP0179	0.058972	-0.0418605	DEMED East Alligator River	WHNT Elizabeth Downs Station	DEMED East Alligator River_WHNT Elizabeth Downs Station	0.764833	0	328.43
52066	CP0217	CP0179	0.0581206	-0.040559	DEMED East Alligator River	WHNT Elizabeth Downs Station	DEMED East Alligator River_WHNT Elizabeth Downs Station	0.770958	0	328.43
36750	CP0219	CP0252	0.0570088	-0.0231875	DEMED East Alligator River	WHNT Elizabeth Downs Station	DEMED East Alligator River_WHNT Elizabeth Downs Station	0.767996	0	328.43
33600	CP0218	CP0252	0.0493492	-0.00138696	DEMED East Alligator River	WHNT Elizabeth Downs Station	DEMED East Alligator River_WHNT Elizabeth Downs Station	0.787961	0	328.43
52068	CP0217	CP0252	0.0449194	0.0308663	DEMED East Alligator River	WHNT Elizabeth Downs Station	DEMED East Alligator River_WHNT Elizabeth Downs Station	0.79578	0	328.43
47771	CP0004	CP0034	0.0956175	-0.240336	DEMED East Alligator River	WHNT King River Goomadeer River	DEMED East Alligator River_WHNT King River Goomadeer River	0.727997	1	100.787
45185	CP0003	CP0034	0.0906951	-0.235584	DEMED East Alligator River	WHNT King River Goomadeer River	DEMED East Alligator River_WHNT King River Goomadeer River	0.725833	1	100.787
47980	CP0229	CP0034	0.0925222	-0.235187	DEMED East Alligator River	WHNT King River Goomadeer River	DEMED East Alligator River_WHNT King River Goomadeer River	0.72859	1	100.787
33670	CP0218	CP0034	0.092291	-0.223032	DEMED East Alligator River	WHNT King River Goomadeer River	DEMED East Alligator River_WHNT King River Goomadeer River	0.733261	1	100.787
52138	CP0217	CP0034	0.0908432	-0.217677	DEMED East Alligator River	WHNT King River Goomadeer River	DEMED East Alligator River_WHNT King River Goomadeer River	0.734542	1	100.787
36820	CP0219	CP0034	0.0890374	-0.21353	DEMED East Alligator River	WHNT King River Goomadeer River	DEMED East Alligator River_WHNT King River Goomadeer River	0.735687	1	100.787
50213	CP0230	CP0034	0.0861633	-0.19708	DEMED East Alligator River	WHNT King River Goomadeer River	DEMED East Alligator River_WHNT King River Goomadeer River	0.741149	1	100.787
47774	CP0004	CP0331	0.0935513	-0.173344	DEMED East Alligator River	WHNT King River Goomadeer River	DEMED East Alligator River_WHNT King River Goomadeer River	0.72416	1	100.787
47983	CP0229	CP0331	0.0880058	-0.169747	DEMED East Alligator River	WHNT King River Goomadeer River	DEMED East Alligator River_WHNT King River Goomadeer River	0.732898	1	100.787
33673	CP0218	CP0331	0.0842105	-0.157143	DEMED East Alligator River	WHNT King River Goomadeer River	DEMED East Alligator River_WHNT King River Goomadeer River	0.741924	1	100.787
33649	CP0218	CP0308	0.078672	-0.151042	DEMED East Alligator River	WHNT King River Goomadeer River	DEMED East Alligator River_WHNT King River Goomadeer River	0.740346	1	100.787
36823	CP0219	CP0331	0.0840275	-0.148876	DEMED East Alligator River	WHNT King River Goomadeer River	DEMED East Alligator River_WHNT King River Goomadeer River	0.72845	1	100.787
33705	CP0218	CP0263	0.0709002	-0.142337	DEMED East Alligator River	WHNT King River Goomadeer River	DEMED East Alligator River_WHNT King River Goomadeer River	0.736695	1	100.787
45188	CP0003	CP0331	0.0818809	-0.141268	DEMED East Alligator River	WHNT King River Goomadeer River	DEMED East Alligator River_WHNT King River Goomadeer River	0.731209	1	100.787
50216	CP0230	CP0331	0.0844203	-0.14078	DEMED East Alligator River	WHNT King River Goomadeer River	DEMED East Alligator River_WHNT King River Goomadeer River	0.733152	1	100.787
47948	CP0229	CP0301	0.0743084	-0.139515	DEMED East Alligator River	WHNT King River Goomadeer River	DEMED East Alligator River_WHNT King River Goomadeer River	0.735762	1	100.787
33693	CP0218	CP0057	0.0761595	-0.139293	DEMED East Alligator River	WHNT King River Goomadeer River	DEMED East Alligator River_WHNT King River Goomadeer River	0.743187	1	100.787
52141	CP0217	CP0331	0.0811057	-0.137825	DEMED East Alligator River	WHNT King River Goomadeer River	DEMED East Alligator River_WHNT King River Goomadeer River	0.741953	1	100.787
33638	CP0218	CP0301	0.0708348	-0.123352	DEMED East Alligator River	WHNT King River Goomadeer River	DEMED East Alligator River_WHNT King River Goomadeer River	0.746205	1	100.787
52117	CP0217	CP0308	0.0734044	-0.118529	DEMED East Alligator River	WHNT King River Goomadeer River	DEMED East Alligator River_WHNT King River Goomadeer River	0.745073	1	100.787
47959	CP0229	CP0308	0.0725763	-0.118018	DEMED East Alligator River	WHNT King River Goomadeer River	DEMED East Alligator River_WHNT King River Goomadeer River	0.74499	1	100.787
33626	CP0218	CP0300	0.070822	-0.117627	DEMED East Alligator River	WHNT King River Goomadeer River	DEMED East Alligator River_WHNT King River Goomadeer River	0.749232	1	100.787
33662	CP0218	CP0380	0.0703481	-0.117544	DEMED East Alligator River	WHNT King River Goomadeer River	DEMED East Alligator River_WHNT King River Goomadeer River	0.74959	1	100.787
33636	CP0218	CP0170	0.071932	-0.113178	DEMED East Alligator River	WHNT King River Goomadeer River	DEMED East Alligator River_WHNT King River Goomadeer River	0.753208	1	100.787
48015	CP0229	CP0263	0.0647897	-0.113079	DEMED East Alligator River	WHNT King River Goomadeer River	DEMED East Alligator River_WHNT King River Goomadeer River	0.739939	1	100.787
47946	CP0229	CP0170	0.0719711	-0.107873	DEMED East Alligator River	WHNT King River Goomadeer River	DEMED East Alligator River_WHNT King River Goomadeer River	0.749458	1	100.787
52161	CP0217	CP0057	0.0719711	-0.105756	DEMED East Alligator River	WHNT King River Goomadeer River	DEMED East Alligator River_WHNT King River Goomadeer River	0.750362	1	100.787
47949	CP0229	CP0360	0.0688465	-0.105605	DEMED East Alligator River	WHNT King River Goomadeer River	DEMED East Alligator River_WHNT King River Goomadeer River	0.746957	1	100.787
52106	CP0217	CP0301	0.0713251	-0.101195	DEMED East Alligator River	WHNT King River Goomadeer River	DEMED East Alligator River_WHNT King River Goomadeer River	0.752444	1	100.787
47972	CP0229	CP0380	0.0681735	-0.100652	DEMED East Alligator River	WHNT King River Goomadeer River	DEMED East Alligator River_WHNT King River Goomadeer River	0.748906	1	100.787
33639	CP0218	CP0360	0.0659041	-0.100209	DEMED East Alligator River	WHNT King River Goomadeer River	DEMED East Alligator River_WHNT King River Goomadeer River	0.752723	1	100.787
33704	CP0218	CP0066	0.0629396	-0.0913028	DEMED East Alligator River	WHNT King River Goomadeer River	DEMED East Alligator River_WHNT King River Goomadeer River	0.755185	1	100.787
52173	CP0217	CP0263	0.0620029	-0.0896999	DEMED East Alligator River	WHNT King River Goomadeer River	DEMED East Alligator River_WHNT King River Goomadeer River	0.749458	1	100.787
52107	CP0217	CP0360	0.0676733	-0.0892491	DEMED East Alligator River	WHNT King River Goomadeer River	DEMED East Alligator River_WHNT King River Goomadeer River	0.753593	1	100.787
52104	CP0217	CP0170	0.0653749	-0.0872609	DEMED East Alligator River	WHNT King River Goomadeer River	DEMED East Alligator River_WHNT King River Goomadeer River	0.753984	1	100.787
36843	CP0219	CP0057	0.0706052	-0.0798077	DEMED East Alligator River	WHNT King River Goomadeer River	DEMED East Alligator River_WHNT King River Goomadeer River	0.744777	1	100.787
47740	CP0004	CP0360	0.0687148	-0.0792484	DEMED East Alligator River	WHNT King River Goomadeer River	DEMED East Alligator River_WHNT King River Goomadeer River	0.746501	1	100.787
47763	CP0004	CP0380	0.0682233	-0.0791202	DEMED East Alligator River	WHNT King River Goomadeer River	DEMED East Alligator River_WHNT King River Goomadeer River	0.746443	1	100.787
47739	CP0004	CP0301	0.0681983	-0.0774625	DEMED East Alligator River	WHNT King River Goomadeer River	DEMED East Alligator River_WHNT King River Goomadeer River	0.74792	1	100.787
48014	CP0229	CP0066	0.0593649	-0.0760055	DEMED East Alligator River	WHNT King River Goomadeer River	DEMED East Alligator River_WHNT King River Goomadeer River	0.754421	1	100.787
36855	CP0219	CP0263	0.067699	-0.0746815	DEMED East Alligator River	WHNT King River Goomadeer River	DEMED East Alligator River_WHNT King River Goomadeer River	0.742798	1	100.787
52130	CP0217	CP0380	0.0626484	-0.0741758	DEMED East Alligator River	WHNT King River Goomadeer River	DEMED East Alligator River_WHNT King River Goomadeer River	0.75726	1	100.787
47806	CP0004	CP0263	0.0624887	-0.0740078	DEMED East Alligator River	WHNT King River Goomadeer River	DEMED East Alligator River_WHNT King River Goomadeer River	0.743814	1	100.787
45151	CP0003	CP0170	0.0688845	-0.071382	DEMED East Alligator River	WHNT King River Goomadeer River	DEMED East Alligator River_WHNT King River Goomadeer River	0.751944	1	100.787
45208	CP0003	CP0057	0.0666185	-0.0706697	DEMED East Alligator River	WHNT King River Goomadeer River	DEMED East Alligator River_WHNT King River Goomadeer River	0.746615	1	100.787
52094	CP0217	CP0300	0.0613686	-0.0701365	DEMED East Alligator River	WHNT King River Goomadeer River	DEMED East Alligator River_WHNT King River Goomadeer River	0.758961	1	100.787
36799	CP0219	CP0308	0.0664506	-0.0682686	DEMED East Alligator River	WHNT King River Goomadeer River	DEMED East Alligator River_WHNT King River Goomadeer River	0.744913	1	100.787
50192	CP0230	CP0308	0.068804	-0.06804	DEMED East Alligator River	WHNT King River Goomadeer River	DEMED East Alligator River_WHNT King River Goomadeer River	0.740994	1	100.787
36776	CP0219	CP0300	0.0683375	-0.0677912	DEMED East Alligator River	WHNT King River Goomadeer River	DEMED East Alligator River_WHNT King River Goomadeer River	0.746664	1	100.787
47750	CP0004	CP0308	0.0668473	-0.066851	DEMED East Alligator River	WHNT King River Goomadeer River	DEMED East Alligator River_WHNT King River Goomadeer River	0.752033	1	100.787
47936	CP0229	CP0300	0.0585683	-0.0664169	DEMED East Alligator River	WHNT King River Goomadeer River	DEMED East Alligator River_WHNT King River Goomadeer River	0.757954	1	100.787
47794	CP0004	CP0057	0.0679436	-0.065918	DEMED East Alligator River	WHNT King River Goomadeer River	DEMED East Alligator River_WHNT King River Goomadeer River	0.753795	1	100.787
36786	CP0219	CP0170	0.0685426	-0.063961	DEMED East Alligator River	WHNT King River Goomadeer River	DEMED East Alligator River_WHNT King River Goomadeer River	0.755231	1	100.787
48003	CP0229	CP0057	0.0628272	-0.0639456	DEMED East Alligator River	WHNT King River Goomadeer River	DEMED East Alligator River_WHNT King River Goomadeer River	0.763495	1	100.787
50181	CP0230	CP0301	0.0659935	-0.062461	DEMED East Alligator River	WHNT King River Goomadeer River	DEMED East Alligator River_WHNT King River Goomadeer River	0.741255	1	100.787
47737	CP0004	CP0170	0.0696706	-0.0616841	DEMED East Alligator River	WHNT King River Goomadeer River	DEMED East Alligator River_WHNT King River Goomadeer River	0.758234	1	100.787
52172	CP0217	CP0066	0.0585472	-0.0609673	DEMED East Alligator River	WHNT King River Goomadeer River	DEMED East Alligator River_WHNT King River Goomadeer River	0.760932	1	100.787
36788	CP0219	CP0301	0.0674482	-0.0605867	DEMED East Alligator River	WHNT King River Goomadeer River	DEMED East Alligator River_WHNT King River Goomadeer River	0.750406	1	100.787
45153	CP0003	CP0301	0.0670644	-0.0585106	DEMED East Alligator River	WHNT King River Goomadeer River	DEMED East Alligator River_WHNT King River Goomadeer River	0.744396	1	100.787
50179	CP0230	CP0170	0.0636724	-0.0572917	DEMED East Alligator River	WHNT King River Goomadeer River	DEMED East Alligator River_WHNT King River Goomadeer River	0.75487	1	100.787
47727	CP0004	CP0300	0.0638452	-0.0568774	DEMED East Alligator River	WHNT King River Goomadeer River	DEMED East Alligator River_WHNT King River Goomadeer River	0.754838	1	100.787
36812	CP0219	CP0380	0.0645689	-0.0553777	DEMED East Alligator River	WHNT King River Goomadeer River	DEMED East Alligator River_WHNT King River Goomadeer River	0.749	1	100.787
36789	CP0219	CP0360	0.0625113	-0.0507663	DEMED East Alligator River	WHNT King River Goomadeer River	DEMED East Alligator River_WHNT King River Goomadeer River	0.749955	1	100.787
50236	CP0230	CP0057	0.0648532	-0.0504484	DEMED East Alligator River	WHNT King River Goomadeer River	DEMED East Alligator River_WHNT King River Goomadeer River	0.755269	1	100.787
47805	CP0004	CP0066	0.0608523	-0.0491217	DEMED East Alligator River	WHNT King River Goomadeer River	DEMED East Alligator River_WHNT King River Goomadeer River	0.756049	1	100.787
45164	CP0003	CP0308	0.067148	-0.0437774	DEMED East Alligator River	WHNT King River Goomadeer River	DEMED East Alligator River_WHNT King River Goomadeer River	0.753249	1	100.787
45220	CP0003	CP0263	0.0588341	-0.0392678	DEMED East Alligator River	WHNT King River Goomadeer River	DEMED East Alligator River_WHNT King River Goomadeer River	0.747789	1	100.787
36854	CP0219	CP0066	0.0581353	-0.0370547	DEMED East Alligator River	WHNT King River Goomadeer River	DEMED East Alligator River_WHNT King River Goomadeer River	0.75423	1	100.787
45177	CP0003	CP0380	0.0603574	-0.0369962	DEMED East Alligator River	WHNT King River Goomadeer River	DEMED East Alligator River_WHNT King River Goomadeer River	0.749362	1	100.787
50247	CP0230	CP0066	0.0586859	-0.0346442	DEMED East Alligator River	WHNT King River Goomadeer River	DEMED East Alligator River_WHNT King River Goomadeer River	0.750315	1	100.787
50182	CP0230	CP0360	0.0610618	-0.0322682	DEMED East Alligator River	WHNT King River Goomadeer River	DEMED East Alligator River_WHNT King River Goomadeer River	0.753216	1	100.787
50248	CP0230	CP0263	0.0572663	-0.0321473	DEMED East Alligator River	WHNT King River Goomadeer River	DEMED East Alligator River_WHNT King River Goomadeer River	0.750225	1	100.787
50169	CP0230	CP0300	0.0593327	-0.026808	DEMED East Alligator River	WHNT King River Goomadeer River	DEMED East Alligator River_WHNT King River Goomadeer River	0.754554	1	100.787
45154	CP0003	CP0360	0.0586633	-0.0224279	DEMED East Alligator River	WHNT King River Goomadeer River	DEMED East Alligator River_WHNT King River Goomadeer River	0.756175	1	100.787
45141	CP0003	CP0300	0.0563889	-0.0162602	DEMED East Alligator River	WHNT King River Goomadeer River	DEMED East Alligator River_WHNT King River Goomadeer River	0.757997	1	100.787
50205	CP0230	CP0380	0.0492996	-0.000942211	DEMED East Alligator River	WHNT King River Goomadeer River	DEMED East Alligator River_WHNT King River Goomadeer River	0.759141	1	100.787
45219	CP0003	CP0066	0.0535811	0.0125	DEMED East Alligator River	WHNT King River Goomadeer River	DEMED East Alligator River_WHNT King River Goomadeer River	0.772145	1	100.787
47849	CP0229	CP0053	0.0846265	-0.211813	DEMED East Alligator River	WHNT Labelle Downs Station	DEMED East Alligator River_WHNT Labelle Downs Station	0.743233	0	306.871
47640	CP0004	CP0053	0.0814373	-0.200866	DEMED East Alligator River	WHNT Labelle Downs Station	DEMED East Alligator River_WHNT Labelle Downs Station	0.745305	0	306.871
45054	CP0003	CP0053	0.0790186	-0.197596	DEMED East Alligator River	WHNT Labelle Downs Station	DEMED East Alligator River_WHNT Labelle Downs Station	0.744001	0	306.871
33539	CP0218	CP0053	0.0820559	-0.182757	DEMED East Alligator River	WHNT Labelle Downs Station	DEMED East Alligator River_WHNT Labelle Downs Station	0.754283	0	306.871
50082	CP0230	CP0053	0.0757876	-0.178652	DEMED East Alligator River	WHNT Labelle Downs Station	DEMED East Alligator River_WHNT Labelle Downs Station	0.749595	0	306.871
47897	CP0229	CP0176	0.0792562	-0.167775	DEMED East Alligator River	WHNT Labelle Downs Station	DEMED East Alligator River_WHNT Labelle Downs Station	0.753024	0	306.871
36689	CP0219	CP0053	0.0723542	-0.157914	DEMED East Alligator River	WHNT Labelle Downs Station	DEMED East Alligator River_WHNT Labelle Downs Station	0.756659	0	306.871
47702	CP0004	CP0272	0.0745375	-0.153267	DEMED East Alligator River	WHNT Labelle Downs Station	DEMED East Alligator River_WHNT Labelle Downs Station	0.751814	0	306.871
50130	CP0230	CP0176	0.0733069	-0.145465	DEMED East Alligator River	WHNT Labelle Downs Station	DEMED East Alligator River_WHNT Labelle Downs Station	0.758015	0	306.871
47911	CP0229	CP0272	0.0732149	-0.143934	DEMED East Alligator River	WHNT Labelle Downs Station	DEMED East Alligator River_WHNT Labelle Downs Station	0.755799	0	306.871
52007	CP0217	CP0053	0.0690278	-0.139495	DEMED East Alligator River	WHNT Labelle Downs Station	DEMED East Alligator River_WHNT Labelle Downs Station	0.762107	0	306.871
33587	CP0218	CP0176	0.0705521	-0.132604	DEMED East Alligator River	WHNT Labelle Downs Station	DEMED East Alligator River_WHNT Labelle Downs Station	0.762811	0	306.871
47864	CP0229	CP0262	0.0768674	-0.13166	DEMED East Alligator River	WHNT Labelle Downs Station	DEMED East Alligator River_WHNT Labelle Downs Station	0.742358	0	306.871
45116	CP0003	CP0272	0.0699402	-0.129399	DEMED East Alligator River	WHNT Labelle Downs Station	DEMED East Alligator River_WHNT Labelle Downs Station	0.758833	0	306.871
47688	CP0004	CP0176	0.0668473	-0.128782	DEMED East Alligator River	WHNT Labelle Downs Station	DEMED East Alligator River_WHNT Labelle Downs Station	0.758988	0	306.871
45102	CP0003	CP0176	0.0676895	-0.121313	DEMED East Alligator River	WHNT Labelle Downs Station	DEMED East Alligator River_WHNT Labelle Downs Station	0.763538	0	306.871
47876	CP0229	CP0268	0.0750045	-0.11921	DEMED East Alligator River	WHNT Labelle Downs Station	DEMED East Alligator River_WHNT Labelle Downs Station	0.746431	0	306.871
47840	CP0229	CP0257	0.0728226	-0.114349	DEMED East Alligator River	WHNT Labelle Downs Station	DEMED East Alligator River_WHNT Labelle Downs Station	0.747109	0	306.871
36737	CP0219	CP0176	0.0657302	-0.109571	DEMED East Alligator River	WHNT Labelle Downs Station	DEMED East Alligator River_WHNT Labelle Downs Station	0.768684	0	306.871
36751	CP0219	CP0272	0.0648834	-0.108291	DEMED East Alligator River	WHNT Labelle Downs Station	DEMED East Alligator River_WHNT Labelle Downs Station	0.763871	0	306.871
47838	CP0229	CP0193	0.0669683	-0.102459	DEMED East Alligator River	WHNT Labelle Downs Station	DEMED East Alligator River_WHNT Labelle Downs Station	0.747692	0	306.871
50144	CP0230	CP0272	0.0621837	-0.102123	DEMED East Alligator River	WHNT Labelle Downs Station	DEMED East Alligator River_WHNT Labelle Downs Station	0.764823	0	306.871
47655	CP0004	CP0262	0.0736785	-0.100756	DEMED East Alligator River	WHNT Labelle Downs Station	DEMED East Alligator River_WHNT Labelle Downs Station	0.742849	0	306.871
33554	CP0218	CP0262	0.0723197	-0.0995483	DEMED East Alligator River	WHNT Labelle Downs Station	DEMED East Alligator River_WHNT Labelle Downs Station	0.760351	0	306.871
52055	CP0217	CP0176	0.0650642	-0.0979305	DEMED East Alligator River	WHNT Labelle Downs Station	DEMED East Alligator River_WHNT Labelle Downs Station	0.772637	0	306.871
33601	CP0218	CP0272	0.0639261	-0.0964784	DEMED East Alligator River	WHNT Labelle Downs Station	DEMED East Alligator River_WHNT Labelle Downs Station	0.769468	0	306.871
47667	CP0004	CP0268	0.0736252	-0.0887467	DEMED East Alligator River	WHNT Labelle Downs Station	DEMED East Alligator River_WHNT Labelle Downs Station	0.749005	0	306.871
47887	CP0229	CP0250	0.0683297	-0.0850955	DEMED East Alligator River	WHNT Labelle Downs Station	DEMED East Alligator River_WHNT Labelle Downs Station	0.758225	0	306.871
47921	CP0229	CP0255	0.0597916	-0.0809738	DEMED East Alligator River	WHNT Labelle Downs Station	DEMED East Alligator River_WHNT Labelle Downs Station	0.752148	0	306.871
47678	CP0004	CP0250	0.0709117	-0.0760512	DEMED East Alligator River	WHNT Labelle Downs Station	DEMED East Alligator River_WHNT Labelle Downs Station	0.753708	0	306.871
47918	CP0229	CP0044	0.0618798	-0.0755102	DEMED East Alligator River	WHNT Labelle Downs Station	DEMED East Alligator River_WHNT Labelle Downs Station	0.75663	0	306.871
33530	CP0218	CP0257	0.0662814	-0.0752949	DEMED East Alligator River	WHNT Labelle Downs Station	DEMED East Alligator River_WHNT Labelle Downs Station	0.766841	0	306.871
47852	CP0229	CP0259	0.0616748	-0.0728669	DEMED East Alligator River	WHNT Labelle Downs Station	DEMED East Alligator River_WHNT Labelle Downs Station	0.758094	0	306.871
52069	CP0217	CP0272	0.0593036	-0.070301	DEMED East Alligator River	WHNT Labelle Downs Station	DEMED East Alligator River_WHNT Labelle Downs Station	0.777566	0	306.871
45069	CP0003	CP0262	0.0652803	-0.0689429	DEMED East Alligator River	WHNT Labelle Downs Station	DEMED East Alligator River_WHNT Labelle Downs Station	0.751899	0	306.871
45081	CP0003	CP0268	0.0655827	-0.0681074	DEMED East Alligator River	WHNT Labelle Downs Station	DEMED East Alligator River_WHNT Labelle Downs Station	0.752123	0	306.871
50097	CP0230	CP0262	0.0673042	-0.0673329	DEMED East Alligator River	WHNT Labelle Downs Station	DEMED East Alligator River_WHNT Labelle Downs Station	0.754872	0	306.871
47631	CP0004	CP0257	0.0672694	-0.0640065	DEMED East Alligator River	WHNT Labelle Downs Station	DEMED East Alligator River_WHNT Labelle Downs Station	0.754159	0	306.871
47629	CP0004	CP0193	0.0646739	-0.0604971	DEMED East Alligator River	WHNT Labelle Downs Station	DEMED East Alligator River_WHNT Labelle Downs Station	0.754167	0	306.871
33542	CP0218	CP0259	0.0614495	-0.0575989	DEMED East Alligator River	WHNT Labelle Downs Station	DEMED East Alligator River_WHNT Labelle Downs Station	0.77101	0	306.871
50109	CP0230	CP0268	0.0625789	-0.0571008	DEMED East Alligator River	WHNT Labelle Downs Station	DEMED East Alligator River_WHNT Labelle Downs Station	0.755546	0	306.871
36704	CP0219	CP0262	0.0640332	-0.0565359	DEMED East Alligator River	WHNT Labelle Downs Station	DEMED East Alligator River_WHNT Labelle Downs Station	0.756854	0	306.871
33566	CP0218	CP0268	0.0572719	-0.0497228	DEMED East Alligator River	WHNT Labelle Downs Station	DEMED East Alligator River_WHNT Labelle Downs Station	0.770641	0	306.871
33528	CP0218	CP0193	0.0577167	-0.0490947	DEMED East Alligator River	WHNT Labelle Downs Station	DEMED East Alligator River_WHNT Labelle Downs Station	0.77239	0	306.871
50120	CP0230	CP0250	0.0620379	-0.0487845	DEMED East Alligator River	WHNT Labelle Downs Station	DEMED East Alligator River_WHNT Labelle Downs Station	0.760775	0	306.871
52045	CP0217	CP0250	0.0590152	-0.0385666	DEMED East Alligator River	WHNT Labelle Downs Station	DEMED East Alligator River_WHNT Labelle Downs Station	0.773353	0	306.871
50085	CP0230	CP0259	0.0638759	-0.0384615	DEMED East Alligator River	WHNT Labelle Downs Station	DEMED East Alligator River_WHNT Labelle Downs Station	0.755684	0	306.871
51998	CP0217	CP0257	0.0557365	-0.0381731	DEMED East Alligator River	WHNT Labelle Downs Station	DEMED East Alligator River_WHNT Labelle Downs Station	0.769996	0	306.871
45045	CP0003	CP0257	0.062692	-0.0377506	DEMED East Alligator River	WHNT Labelle Downs Station	DEMED East Alligator River_WHNT Labelle Downs Station	0.752575	0	306.871
47712	CP0004	CP0255	0.0565313	-0.0373847	DEMED East Alligator River	WHNT Labelle Downs Station	DEMED East Alligator River_WHNT Labelle Downs Station	0.75805	0	306.871
47643	CP0004	CP0259	0.0593558	-0.036645	DEMED East Alligator River	WHNT Labelle Downs Station	DEMED East Alligator River_WHNT Labelle Downs Station	0.76122	0	306.871
52010	CP0217	CP0259	0.054147	-0.0356412	DEMED East Alligator River	WHNT Labelle Downs Station	DEMED East Alligator River_WHNT Labelle Downs Station	0.769739	0	306.871
33577	CP0218	CP0250	0.0594399	-0.0350694	DEMED East Alligator River	WHNT Labelle Downs Station	DEMED East Alligator River_WHNT Labelle Downs Station	0.78103	0	306.871
36680	CP0219	CP0257	0.0609229	-0.0329408	DEMED East Alligator River	WHNT Labelle Downs Station	DEMED East Alligator River_WHNT Labelle Downs Station	0.759102	0	306.871
50071	CP0230	CP0193	0.058696	-0.0328315	DEMED East Alligator River	WHNT Labelle Downs Station	DEMED East Alligator River_WHNT Labelle Downs Station	0.758263	0	306.871
45043	CP0003	CP0193	0.0591855	-0.0319149	DEMED East Alligator River	WHNT Labelle Downs Station	DEMED East Alligator River_WHNT Labelle Downs Station	0.760543	0	306.871
36678	CP0219	CP0193	0.0635609	-0.0311297	DEMED East Alligator River	WHNT Labelle Downs Station	DEMED East Alligator River_WHNT Labelle Downs Station	0.764717	0	306.871
33611	CP0218	CP0255	0.0520548	-0.0300489	DEMED East Alligator River	WHNT Labelle Downs Station	DEMED East Alligator River_WHNT Labelle Downs Station	0.774977	0	306.871
51996	CP0217	CP0193	0.056744	-0.0280438	DEMED East Alligator River	WHNT Labelle Downs Station	DEMED East Alligator River_WHNT Labelle Downs Station	0.776831	0	306.871
50073	CP0230	CP0257	0.0611141	-0.0278822	DEMED East Alligator River	WHNT Labelle Downs Station	DEMED East Alligator River_WHNT Labelle Downs Station	0.757346	0	306.871
50151	CP0230	CP0044	0.0615551	-0.0250935	DEMED East Alligator River	WHNT Labelle Downs Station	DEMED East Alligator River_WHNT Labelle Downs Station	0.758369	0	306.871
45126	CP0003	CP0255	0.0566624	-0.021109	DEMED East Alligator River	WHNT Labelle Downs Station	DEMED East Alligator River_WHNT Labelle Downs Station	0.754341	0	306.871
45092	CP0003	CP0250	0.0565697	-0.0205322	DEMED East Alligator River	WHNT Labelle Downs Station	DEMED East Alligator River_WHNT Labelle Downs Station	0.770197	0	306.871
45057	CP0003	CP0259	0.0584087	-0.0194374	DEMED East Alligator River	WHNT Labelle Downs Station	DEMED East Alligator River_WHNT Labelle Downs Station	0.761212	0	306.871
36716	CP0219	CP0268	0.0562568	-0.0183126	DEMED East Alligator River	WHNT Labelle Downs Station	DEMED East Alligator River_WHNT Labelle Downs Station	0.770465	0	306.871
33608	CP0218	CP0044	0.0524608	-0.0148892	DEMED East Alligator River	WHNT Labelle Downs Station	DEMED East Alligator River_WHNT Labelle Downs Station	0.784388	0	306.871
52022	CP0217	CP0262	0.0534323	-0.0128161	DEMED East Alligator River	WHNT Labelle Downs Station	DEMED East Alligator River_WHNT Labelle Downs Station	0.781652	0	306.871
36761	CP0219	CP0255	0.0530828	-0.0104636	DEMED East Alligator River	WHNT Labelle Downs Station	DEMED East Alligator River_WHNT Labelle Downs Station	0.763864	0	306.871
47709	CP0004	CP0044	0.0548836	-0.00959038	DEMED East Alligator River	WHNT Labelle Downs Station	DEMED East Alligator River_WHNT Labelle Downs Station	0.77189	0	306.871
36727	CP0219	CP0250	0.0515687	-0.000491481	DEMED East Alligator River	WHNT Labelle Downs Station	DEMED East Alligator River_WHNT Labelle Downs Station	0.776145	0	306.871
45123	CP0003	CP0044	0.0560967	0.000312305	DEMED East Alligator River	WHNT Labelle Downs Station	DEMED East Alligator River_WHNT Labelle Downs Station	0.767496	0	306.871
50154	CP0230	CP0255	0.0512587	0.000629723	DEMED East Alligator River	WHNT Labelle Downs Station	DEMED East Alligator River_WHNT Labelle Downs Station	0.761948	0	306.871
52076	CP0217	CP0044	0.0480491	0.00119129	DEMED East Alligator River	WHNT Labelle Downs Station	DEMED East Alligator River_WHNT Labelle Downs Station	0.783327	0	306.871
52034	CP0217	CP0268	0.0443439	0.00392224	DEMED East Alligator River	WHNT Labelle Downs Station	DEMED East Alligator River_WHNT Labelle Downs Station	0.781086	0	306.871
52079	CP0217	CP0255	0.0442737	0.0161401	DEMED East Alligator River	WHNT Labelle Downs Station	DEMED East Alligator River_WHNT Labelle Downs Station	0.786498	0	306.871
36692	CP0219	CP0259	0.0512266	0.0209924	DEMED East Alligator River	WHNT Labelle Downs Station	DEMED East Alligator River_WHNT Labelle Downs Station	0.779582	0	306.871
36758	CP0219	CP0044	0.0305865	0.104577	DEMED East Alligator River	WHNT Labelle Downs Station	DEMED East Alligator River_WHNT Labelle Downs Station	0.806765	0	306.871
47875	CP0229	CP0247	0.102299	-0.497532	DEMED East Alligator River	WHNT Litchfield Station	DEMED East Alligator River_WHNT Litchfield Station	0.736375	0	295.214
47666	CP0004	CP0247	0.100236	-0.494318	DEMED East Alligator River	WHNT Litchfield Station	DEMED East Alligator River_WHNT Litchfield Station	0.735454	0	295.214
36715	CP0219	CP0247	0.097019	-0.484452	DEMED East Alligator River	WHNT Litchfield Station	DEMED East Alligator River_WHNT Litchfield Station	0.736676	0	295.214
45080	CP0003	CP0247	0.0943499	-0.472799	DEMED East Alligator River	WHNT Litchfield Station	DEMED East Alligator River_WHNT Litchfield Station	0.738138	0	295.214
50108	CP0230	CP0247	0.0921409	-0.468164	DEMED East Alligator River	WHNT Litchfield Station	DEMED East Alligator River_WHNT Litchfield Station	0.73776	0	295.214
33565	CP0218	CP0247	0.095945	-0.421457	DEMED East Alligator River	WHNT Litchfield Station	DEMED East Alligator River_WHNT Litchfield Station	0.759323	0	295.214
52033	CP0217	CP0247	0.0902992	-0.410644	DEMED East Alligator River	WHNT Litchfield Station	DEMED East Alligator River_WHNT Litchfield Station	0.756754	0	295.214
47863	CP0229	CP0246	0.0876812	-0.262132	DEMED East Alligator River	WHNT Litchfield Station	DEMED East Alligator River_WHNT Litchfield Station	0.74058	0	295.214
47654	CP0004	CP0246	0.0819286	-0.241249	DEMED East Alligator River	WHNT Litchfield Station	DEMED East Alligator River_WHNT Litchfield Station	0.744154	0	295.214
45068	CP0003	CP0246	0.0789569	-0.238086	DEMED East Alligator River	WHNT Litchfield Station	DEMED East Alligator River_WHNT Litchfield Station	0.742394	0	295.214
50096	CP0230	CP0246	0.0721128	-0.212272	DEMED East Alligator River	WHNT Litchfield Station	DEMED East Alligator River_WHNT Litchfield Station	0.747967	0	295.214
36703	CP0219	CP0246	0.0737261	-0.198646	DEMED East Alligator River	WHNT Litchfield Station	DEMED East Alligator River_WHNT Litchfield Station	0.756596	0	295.214
33553	CP0218	CP0246	0.0769231	-0.193471	DEMED East Alligator River	WHNT Litchfield Station	DEMED East Alligator River_WHNT Litchfield Station	0.761629	0	295.214
33526	CP0218	CP0025	0.0891536	-0.18672	DEMED East Alligator River	WHNT Litchfield Station	DEMED East Alligator River_WHNT Litchfield Station	0.731727	0	295.214
52021	CP0217	CP0246	0.0694722	-0.166733	DEMED East Alligator River	WHNT Litchfield Station	DEMED East Alligator River_WHNT Litchfield Station	0.765917	0	295.214
47642	CP0004	CP0244	0.0782153	-0.164594	DEMED East Alligator River	WHNT Litchfield Station	DEMED East Alligator River_WHNT Litchfield Station	0.75	0	295.214
47836	CP0229	CP0025	0.0816179	-0.149081	DEMED East Alligator River	WHNT Litchfield Station	DEMED East Alligator River_WHNT Litchfield Station	0.73727	0	295.214
45056	CP0003	CP0244	0.072911	-0.147727	DEMED East Alligator River	WHNT Litchfield Station	DEMED East Alligator River_WHNT Litchfield Station	0.754016	0	295.214
50084	CP0230	CP0244	0.0736539	-0.143275	DEMED East Alligator River	WHNT Litchfield Station	DEMED East Alligator River_WHNT Litchfield Station	0.756708	0	295.214
47851	CP0229	CP0244	0.0736329	-0.141161	DEMED East Alligator River	WHNT Litchfield Station	DEMED East Alligator River_WHNT Litchfield Station	0.756813	0	295.214
51994	CP0217	CP0025	0.080651	-0.139741	DEMED East Alligator River	WHNT Litchfield Station	DEMED East Alligator River_WHNT Litchfield Station	0.74123	0	295.214
36691	CP0219	CP0244	0.0707598	-0.135219	DEMED East Alligator River	WHNT Litchfield Station	DEMED East Alligator River_WHNT Litchfield Station	0.757382	0	295.214
45065	CP0003	CP0030	0.0714543	-0.133948	DEMED East Alligator River	WHNT Litchfield Station	DEMED East Alligator River_WHNT Litchfield Station	0.748647	0	295.214
47860	CP0229	CP0030	0.0720087	-0.128364	DEMED East Alligator River	WHNT Litchfield Station	DEMED East Alligator River_WHNT Litchfield Station	0.75176	0	295.214
47651	CP0004	CP0030	0.0718801	-0.120922	DEMED East Alligator River	WHNT Litchfield Station	DEMED East Alligator River_WHNT Litchfield Station	0.755644	0	295.214
47627	CP0004	CP0025	0.0818576	-0.115485	DEMED East Alligator River	WHNT Litchfield Station	DEMED East Alligator River_WHNT Litchfield Station	0.739971	0	295.214
36700	CP0219	CP0030	0.070027	-0.108934	DEMED East Alligator River	WHNT Litchfield Station	DEMED East Alligator River_WHNT Litchfield Station	0.759586	0	295.214
45041	CP0003	CP0025	0.0769092	-0.108675	DEMED East Alligator River	WHNT Litchfield Station	DEMED East Alligator River_WHNT Litchfield Station	0.733616	0	295.214
50093	CP0230	CP0030	0.0621174	-0.103931	DEMED East Alligator River	WHNT Litchfield Station	DEMED East Alligator River_WHNT Litchfield Station	0.755041	0	295.214
33590	CP0218	CP0270	0.0683388	-0.101045	DEMED East Alligator River	WHNT Litchfield Station	DEMED East Alligator River_WHNT Litchfield Station	0.754816	0	295.214
47900	CP0229	CP0270	0.0698436	-0.0979753	DEMED East Alligator River	WHNT Litchfield Station	DEMED East Alligator River_WHNT Litchfield Station	0.75291	0	295.214
33541	CP0218	CP0244	0.0643939	-0.0939327	DEMED East Alligator River	WHNT Litchfield Station	DEMED East Alligator River_WHNT Litchfield Station	0.771284	0	295.214
47888	CP0229	CP0269	0.0706159	-0.0934309	DEMED East Alligator River	WHNT Litchfield Station	DEMED East Alligator River_WHNT Litchfield Station	0.755734	0	295.214
50069	CP0230	CP0025	0.0720591	-0.0896287	DEMED East Alligator River	WHNT Litchfield Station	DEMED East Alligator River_WHNT Litchfield Station	0.740227	0	295.214
36676	CP0219	CP0025	0.0733069	-0.0892514	DEMED East Alligator River	WHNT Litchfield Station	DEMED East Alligator River_WHNT Litchfield Station	0.741535	0	295.214
47896	CP0229	CP0036	0.0693016	-0.0884956	DEMED East Alligator River	WHNT Litchfield Station	DEMED East Alligator River_WHNT Litchfield Station	0.757264	0	295.214
47861	CP0229	CP0071	0.0648248	-0.0882253	DEMED East Alligator River	WHNT Litchfield Station	DEMED East Alligator River_WHNT Litchfield Station	0.753611	0	295.214
47850	CP0229	CP0196	0.0684981	-0.0854905	DEMED East Alligator River	WHNT Litchfield Station	DEMED East Alligator River_WHNT Litchfield Station	0.757817	0	295.214
47917	CP0229	CP0019	0.0656566	-0.0843537	DEMED East Alligator River	WHNT Litchfield Station	DEMED East Alligator River_WHNT Litchfield Station	0.755772	0	295.214
47884	CP0229	CP0035	0.064743	-0.0833901	DEMED East Alligator River	WHNT Litchfield Station	DEMED East Alligator River_WHNT Litchfield Station	0.755636	0	295.214
52058	CP0217	CP0270	0.0640699	-0.0759602	DEMED East Alligator River	WHNT Litchfield Station	DEMED East Alligator River_WHNT Litchfield Station	0.758373	0	295.214
47837	CP0229	CP0046	0.0612577	-0.0730586	DEMED East Alligator River	WHNT Litchfield Station	DEMED East Alligator River_WHNT Litchfield Station	0.757228	0	295.214
47919	CP0229	CP0190	0.0629623	-0.0726685	DEMED East Alligator River	WHNT Litchfield Station	DEMED East Alligator River_WHNT Litchfield Station	0.759426	0	295.214
33607	CP0218	CP0019	0.0645394	-0.0718988	DEMED East Alligator River	WHNT Litchfield Station	DEMED East Alligator River_WHNT Litchfield Station	0.766991	0	295.214
33609	CP0218	CP0190	0.0623873	-0.0690789	DEMED East Alligator River	WHNT Litchfield Station	DEMED East Alligator River_WHNT Litchfield Station	0.766048	0	295.214
47899	CP0229	CP0251	0.0599095	-0.0676551	DEMED East Alligator River	WHNT Litchfield Station	DEMED East Alligator River_WHNT Litchfield Station	0.758462	0	295.214
52018	CP0217	CP0030	0.0619917	-0.065687	DEMED East Alligator River	WHNT Litchfield Station	DEMED East Alligator River_WHNT Litchfield Station	0.773269	0	295.214
50129	CP0230	CP0036	0.0660785	-0.0656516	DEMED East Alligator River	WHNT Litchfield Station	DEMED East Alligator River_WHNT Litchfield Station	0.755041	0	295.214
47907	CP0229	CP0043	0.0586537	-0.0605854	DEMED East Alligator River	WHNT Litchfield Station	DEMED East Alligator River_WHNT Litchfield Station	0.761415	0	295.214
52042	CP0217	CP0035	0.0610439	-0.0585432	DEMED East Alligator River	WHNT Litchfield Station	DEMED East Alligator River_WHNT Litchfield Station	0.764674	0	295.214
47641	CP0004	CP0196	0.0658347	-0.0580092	DEMED East Alligator River	WHNT Litchfield Station	DEMED East Alligator River_WHNT Litchfield Station	0.759631	0	295.214
52009	CP0217	CP0244	0.0547722	-0.0572112	DEMED East Alligator River	WHNT Litchfield Station	DEMED East Alligator River_WHNT Litchfield Station	0.781001	0	295.214
50083	CP0230	CP0196	0.0623873	-0.0557199	DEMED East Alligator River	WHNT Litchfield Station	DEMED East Alligator River_WHNT Litchfield Station	0.757573	0	295.214
33574	CP0218	CP0035	0.0607426	-0.0547091	DEMED East Alligator River	WHNT Litchfield Station	DEMED East Alligator River_WHNT Litchfield Station	0.77199	0	295.214
47710	CP0004	CP0190	0.0619245	-0.0538386	DEMED East Alligator River	WHNT Litchfield Station	DEMED East Alligator River_WHNT Litchfield Station	0.754559	0	295.214
47690	CP0004	CP0251	0.067198	-0.0521924	DEMED East Alligator River	WHNT Litchfield Station	DEMED East Alligator River_WHNT Litchfield Station	0.761547	0	295.214
47691	CP0004	CP0270	0.0613396	-0.0484928	DEMED East Alligator River	WHNT Litchfield Station	DEMED East Alligator River_WHNT Litchfield Station	0.756644	0	295.214
45055	CP0003	CP0196	0.0594507	-0.0475561	DEMED East Alligator River	WHNT Litchfield Station	DEMED East Alligator River_WHNT Litchfield Station	0.759848	0	295.214
47679	CP0004	CP0269	0.0654256	-0.0472621	DEMED East Alligator River	WHNT Litchfield Station	DEMED East Alligator River_WHNT Litchfield Station	0.761974	0	295.214
45104	CP0003	CP0251	0.0622399	-0.0459883	DEMED East Alligator River	WHNT Litchfield Station	DEMED East Alligator River_WHNT Litchfield Station	0.759363	0	295.214
45093	CP0003	CP0269	0.0673528	-0.0456425	DEMED East Alligator River	WHNT Litchfield Station	DEMED East Alligator River_WHNT Litchfield Station	0.757584	0	295.214
47708	CP0004	CP0019	0.0624661	-0.045499	DEMED East Alligator River	WHNT Litchfield Station	DEMED East Alligator River_WHNT Litchfield Station	0.760516	0	295.214
33550	CP0218	CP0030	0.0559163	-0.0453258	DEMED East Alligator River	WHNT Litchfield Station	DEMED East Alligator River_WHNT Litchfield Station	0.778139	0	295.214
33578	CP0218	CP0269	0.0593863	-0.0449653	DEMED East Alligator River	WHNT Litchfield Station	DEMED East Alligator River_WHNT Litchfield Station	0.776083	0	295.214
47675	CP0004	CP0035	0.0609998	-0.0440507	DEMED East Alligator River	WHNT Litchfield Station	DEMED East Alligator River_WHNT Litchfield Station	0.758979	0	295.214
33597	CP0218	CP0043	0.0598954	-0.043659	DEMED East Alligator River	WHNT Litchfield Station	DEMED East Alligator River_WHNT Litchfield Station	0.776836	0	295.214
33586	CP0218	CP0036	0.0532107	-0.0416378	DEMED East Alligator River	WHNT Litchfield Station	DEMED East Alligator River_WHNT Litchfield Station	0.771645	0	295.214
47687	CP0004	CP0036	0.0617663	-0.0413657	DEMED East Alligator River	WHNT Litchfield Station	DEMED East Alligator River_WHNT Litchfield Station	0.763952	0	295.214
50132	CP0230	CP0251	0.0603106	-0.0410691	DEMED East Alligator River	WHNT Litchfield Station	DEMED East Alligator River_WHNT Litchfield Station	0.760563	0	295.214
52077	CP0217	CP0190	0.0561879	-0.0396528	DEMED East Alligator River	WHNT Litchfield Station	DEMED East Alligator River_WHNT Litchfield Station	0.769738	0	295.214
33551	CP0218	CP0071	0.0557661	-0.0395284	DEMED East Alligator River	WHNT Litchfield Station	DEMED East Alligator River_WHNT Litchfield Station	0.77495	0	295.214
50121	CP0230	CP0269	0.061982	-0.0371193	DEMED East Alligator River	WHNT Litchfield Station	DEMED East Alligator River_WHNT Litchfield Station	0.756937	0	295.214
47698	CP0004	CP0043	0.060513	-0.0357607	DEMED East Alligator River	WHNT Litchfield Station	DEMED East Alligator River_WHNT Litchfield Station	0.762825	0	295.214
36759	CP0219	CP0190	0.0620839	-0.0357597	DEMED East Alligator River	WHNT Litchfield Station	DEMED East Alligator River_WHNT Litchfield Station	0.758773	0	295.214
50094	CP0230	CP0071	0.0610701	-0.0354024	DEMED East Alligator River	WHNT Litchfield Station	DEMED East Alligator River_WHNT Litchfield Station	0.751847	0	295.214
45122	CP0003	CP0019	0.0588023	-0.0330189	DEMED East Alligator River	WHNT Litchfield Station	DEMED East Alligator River_WHNT Litchfield Station	0.763258	0	295.214
52054	CP0217	CP0036	0.0542201	-0.0327198	DEMED East Alligator River	WHNT Litchfield Station	DEMED East Alligator River_WHNT Litchfield Station	0.771733	0	295.214
36690	CP0219	CP0196	0.0627253	-0.0311265	DEMED East Alligator River	WHNT Litchfield Station	DEMED East Alligator River_WHNT Litchfield Station	0.77208	0	295.214
52019	CP0217	CP0071	0.0546013	-0.0289707	DEMED East Alligator River	WHNT Litchfield Station	DEMED East Alligator River_WHNT Litchfield Station	0.774001	0	295.214
36740	CP0219	CP0270	0.0634978	-0.0267457	DEMED East Alligator River	WHNT Litchfield Station	DEMED East Alligator River_WHNT Litchfield Station	0.765149	0	295.214
33589	CP0218	CP0251	0.0533454	-0.0229167	DEMED East Alligator River	WHNT Litchfield Station	DEMED East Alligator River_WHNT Litchfield Station	0.781013	0	295.214
52065	CP0217	CP0043	0.0507862	-0.0211316	DEMED East Alligator River	WHNT Litchfield Station	DEMED East Alligator River_WHNT Litchfield Station	0.774444	0	295.214
45124	CP0003	CP0190	0.0577201	-0.0202998	DEMED East Alligator River	WHNT Litchfield Station	DEMED East Alligator River_WHNT Litchfield Station	0.757215	0	295.214
45101	CP0003	CP0036	0.0552147	-0.0198361	DEMED East Alligator River	WHNT Litchfield Station	DEMED East Alligator River_WHNT Litchfield Station	0.769127	0	295.214
47652	CP0004	CP0071	0.0563787	-0.01809	DEMED East Alligator River	WHNT Litchfield Station	DEMED East Alligator River_WHNT Litchfield Station	0.769154	0	295.214
50070	CP0230	CP0046	0.0566174	-0.0174891	DEMED East Alligator River	WHNT Litchfield Station	DEMED East Alligator River_WHNT Litchfield Station	0.757843	0	295.214
47628	CP0004	CP0046	0.0522698	-0.0174154	DEMED East Alligator River	WHNT Litchfield Station	DEMED East Alligator River_WHNT Litchfield Station	0.764786	0	295.214
45089	CP0003	CP0035	0.0576992	-0.0173329	DEMED East Alligator River	WHNT Litchfield Station	DEMED East Alligator River_WHNT Litchfield Station	0.759016	0	295.214
50133	CP0230	CP0270	0.0600617	-0.0169705	DEMED East Alligator River	WHNT Litchfield Station	DEMED East Alligator River_WHNT Litchfield Station	0.761568	0	295.214
36728	CP0219	CP0269	0.0547649	-0.0160931	DEMED East Alligator River	WHNT Litchfield Station	DEMED East Alligator River_WHNT Litchfield Station	0.763016	0	295.214
36701	CP0219	CP0071	0.0588977	-0.0135264	DEMED East Alligator River	WHNT Litchfield Station	DEMED East Alligator River_WHNT Litchfield Station	0.768282	0	295.214
36736	CP0219	CP0036	0.0516559	-0.013244	DEMED East Alligator River	WHNT Litchfield Station	DEMED East Alligator River_WHNT Litchfield Station	0.769168	0	295.214
50117	CP0230	CP0035	0.0600936	-0.0121571	DEMED East Alligator River	WHNT Litchfield Station	DEMED East Alligator River_WHNT Litchfield Station	0.764484	0	295.214
45112	CP0003	CP0043	0.056488	-0.0110868	DEMED East Alligator River	WHNT Litchfield Station	DEMED East Alligator River_WHNT Litchfield Station	0.761144	0	295.214
36739	CP0219	CP0251	0.0552347	-0.00977836	DEMED East Alligator River	WHNT Litchfield Station	DEMED East Alligator River_WHNT Litchfield Station	0.772924	0	295.214
36724	CP0219	CP0035	0.056485	-0.00540369	DEMED East Alligator River	WHNT Litchfield Station	DEMED East Alligator River_WHNT Litchfield Station	0.770462	0	295.214
50150	CP0230	CP0019	0.0538157	-0.00518807	DEMED East Alligator River	WHNT Litchfield Station	DEMED East Alligator River_WHNT Litchfield Station	0.773398	0	295.214
50152	CP0230	CP0190	0.0548956	-0.00420823	DEMED East Alligator River	WHNT Litchfield Station	DEMED East Alligator River_WHNT Litchfield Station	0.763769	0	295.214
36757	CP0219	CP0019	0.0536261	-0.00307642	DEMED East Alligator River	WHNT Litchfield Station	DEMED East Alligator River_WHNT Litchfield Station	0.774069	0	295.214
52075	CP0217	CP0019	0.0471545	-0.00238582	DEMED East Alligator River	WHNT Litchfield Station	DEMED East Alligator River_WHNT Litchfield Station	0.780849	0	295.214
33527	CP0218	CP0046	0.0442558	-0.0017325	DEMED East Alligator River	WHNT Litchfield Station	DEMED East Alligator River_WHNT Litchfield Station	0.782695	0	295.214
45105	CP0003	CP0270	0.0552627	-0.00157233	DEMED East Alligator River	WHNT Litchfield Station	DEMED East Alligator River_WHNT Litchfield Station	0.765315	0	295.214
33540	CP0218	CP0196	0.0525555	0.00121359	DEMED East Alligator River	WHNT Litchfield Station	DEMED East Alligator River_WHNT Litchfield Station	0.792758	0	295.214
36677	CP0219	CP0046	0.0483144	0.0012747	DEMED East Alligator River	WHNT Litchfield Station	DEMED East Alligator River_WHNT Litchfield Station	0.76618	0	295.214
50140	CP0230	CP0043	0.0552854	0.00499064	DEMED East Alligator River	WHNT Litchfield Station	DEMED East Alligator River_WHNT Litchfield Station	0.769494	0	295.214
36747	CP0219	CP0043	0.0527548	0.00700191	DEMED East Alligator River	WHNT Litchfield Station	DEMED East Alligator River_WHNT Litchfield Station	0.773857	0	295.214
45066	CP0003	CP0071	0.0545225	0.00704005	DEMED East Alligator River	WHNT Litchfield Station	DEMED East Alligator River_WHNT Litchfield Station	0.770085	0	295.214
51995	CP0217	CP0046	0.04181	0.00936649	DEMED East Alligator River	WHNT Litchfield Station	DEMED East Alligator River_WHNT Litchfield Station	0.781086	0	295.214
52008	CP0217	CP0196	0.0479464	0.00953029	DEMED East Alligator River	WHNT Litchfield Station	DEMED East Alligator River_WHNT Litchfield Station	0.787226	0	295.214
52057	CP0217	CP0251	0.0472997	0.01603	DEMED East Alligator River	WHNT Litchfield Station	DEMED East Alligator River_WHNT Litchfield Station	0.790141	0	295.214
45042	CP0003	CP0046	0.0469823	0.0231106	DEMED East Alligator River	WHNT Litchfield Station	DEMED East Alligator River_WHNT Litchfield Station	0.771052	0	295.214
52046	CP0217	CP0269	0.0415913	0.0432856	DEMED East Alligator River	WHNT Litchfield Station	DEMED East Alligator River_WHNT Litchfield Station	0.799277	0	295.214
52092	CP0217	CP0165	0.0980286	-0.25163	DEMED East Alligator River	WHNT Maningrida Bawinanga Liverpool Rv Blyth Rv	DEMED East Alligator River_WHNT Maningrida Bawinanga Liverpool Rv Blyth Rv	0.722825	1	161.73
33624	CP0218	CP0165	0.0980144	-0.239508	DEMED East Alligator River	WHNT Maningrida Bawinanga Liverpool Rv Blyth Rv	DEMED East Alligator River_WHNT Maningrida Bawinanga Liverpool Rv Blyth Rv	0.729061	1	161.73
47934	CP0229	CP0165	0.0933719	-0.232752	DEMED East Alligator River	WHNT Maningrida Bawinanga Liverpool Rv Blyth Rv	DEMED East Alligator River_WHNT Maningrida Bawinanga Liverpool Rv Blyth Rv	0.728915	1	161.73
36774	CP0219	CP0165	0.0911547	-0.231729	DEMED East Alligator River	WHNT Maningrida Bawinanga Liverpool Rv Blyth Rv	DEMED East Alligator River_WHNT Maningrida Bawinanga Liverpool Rv Blyth Rv	0.726806	1	161.73
33650	CP0218	CP0374	0.0977252	-0.223601	DEMED East Alligator River	WHNT Maningrida Bawinanga Liverpool Rv Blyth Rv	DEMED East Alligator River_WHNT Maningrida Bawinanga Liverpool Rv Blyth Rv	0.72111	1	161.73
47725	CP0004	CP0165	0.0905476	-0.219203	DEMED East Alligator River	WHNT Maningrida Bawinanga Liverpool Rv Blyth Rv	DEMED East Alligator River_WHNT Maningrida Bawinanga Liverpool Rv Blyth Rv	0.731791	1	161.73
45139	CP0003	CP0165	0.0866739	-0.213949	DEMED East Alligator River	WHNT Maningrida Bawinanga Liverpool Rv Blyth Rv	DEMED East Alligator River_WHNT Maningrida Bawinanga Liverpool Rv Blyth Rv	0.73086	1	161.73
52118	CP0217	CP0374	0.0966448	-0.205357	DEMED East Alligator River	WHNT Maningrida Bawinanga Liverpool Rv Blyth Rv	DEMED East Alligator River_WHNT Maningrida Bawinanga Liverpool Rv Blyth Rv	0.722101	1	161.73
50167	CP0230	CP0165	0.0836036	-0.19754	DEMED East Alligator River	WHNT Maningrida Bawinanga Liverpool Rv Blyth Rv	DEMED East Alligator River_WHNT Maningrida Bawinanga Liverpool Rv Blyth Rv	0.736216	1	161.73
33659	CP0218	CP0186	0.0828819	-0.180825	DEMED East Alligator River	WHNT Maningrida Bawinanga Liverpool Rv Blyth Rv	DEMED East Alligator River_WHNT Maningrida Bawinanga Liverpool Rv Blyth Rv	0.728332	1	161.73
47960	CP0229	CP0374	0.0881121	-0.177055	DEMED East Alligator River	WHNT Maningrida Bawinanga Liverpool Rv Blyth Rv	DEMED East Alligator River_WHNT Maningrida Bawinanga Liverpool Rv Blyth Rv	0.7282	1	161.73
33646	CP0218	CP0023	0.0843134	-0.175521	DEMED East Alligator River	WHNT Maningrida Bawinanga Liverpool Rv Blyth Rv	DEMED East Alligator River_WHNT Maningrida Bawinanga Liverpool Rv Blyth Rv	0.732314	1	161.73
47995	CP0229	CP0337	0.0881481	-0.174688	DEMED East Alligator River	WHNT Maningrida Bawinanga Liverpool Rv Blyth Rv	DEMED East Alligator River_WHNT Maningrida Bawinanga Liverpool Rv Blyth Rv	0.727315	1	161.73
33685	CP0218	CP0337	0.0866667	-0.173444	DEMED East Alligator River	WHNT Maningrida Bawinanga Liverpool Rv Blyth Rv	DEMED East Alligator River_WHNT Maningrida Bawinanga Liverpool Rv Blyth Rv	0.733981	1	161.73
33696	CP0218	CP0338	0.080654	-0.169462	DEMED East Alligator River	WHNT Maningrida Bawinanga Liverpool Rv Blyth Rv	DEMED East Alligator River_WHNT Maningrida Bawinanga Liverpool Rv Blyth Rv	0.732607	1	161.73
33614	CP0218	CP0297	0.0834236	-0.16898	DEMED East Alligator River	WHNT Maningrida Bawinanga Liverpool Rv Blyth Rv	DEMED East Alligator River_WHNT Maningrida Bawinanga Liverpool Rv Blyth Rv	0.735283	1	161.73
36800	CP0219	CP0374	0.0889777	-0.165941	DEMED East Alligator River	WHNT Maningrida Bawinanga Liverpool Rv Blyth Rv	DEMED East Alligator River_WHNT Maningrida Bawinanga Liverpool Rv Blyth Rv	0.727892	1	161.73
52082	CP0217	CP0297	0.0855644	-0.161845	DEMED East Alligator River	WHNT Maningrida Bawinanga Liverpool Rv Blyth Rv	DEMED East Alligator River_WHNT Maningrida Bawinanga Liverpool Rv Blyth Rv	0.73381	1	161.73
47937	CP0229	CP0342	0.0799637	-0.15948	DEMED East Alligator River	WHNT Maningrida Bawinanga Liverpool Rv Blyth Rv	DEMED East Alligator River_WHNT Maningrida Bawinanga Liverpool Rv Blyth Rv	0.730553	1	161.73
33661	CP0218	CP0329	0.0787071	-0.158772	DEMED East Alligator River	WHNT Maningrida Bawinanga Liverpool Rv Blyth Rv	DEMED East Alligator River_WHNT Maningrida Bawinanga Liverpool Rv Blyth Rv	0.735847	1	161.73
47751	CP0004	CP0374	0.0892532	-0.158418	DEMED East Alligator River	WHNT Maningrida Bawinanga Liverpool Rv Blyth Rv	DEMED East Alligator River_WHNT Maningrida Bawinanga Liverpool Rv Blyth Rv	0.73306	1	161.73
47969	CP0229	CP0186	0.0775068	-0.157143	DEMED East Alligator River	WHNT Maningrida Bawinanga Liverpool Rv Blyth Rv	DEMED East Alligator River_WHNT Maningrida Bawinanga Liverpool Rv Blyth Rv	0.728455	1	161.73
47924	CP0229	CP0297	0.0825655	-0.156676	DEMED East Alligator River	WHNT Maningrida Bawinanga Liverpool Rv Blyth Rv	DEMED East Alligator River_WHNT Maningrida Bawinanga Liverpool Rv Blyth Rv	0.734237	1	161.73
50193	CP0230	CP0374	0.0859219	-0.152145	DEMED East Alligator River	WHNT Maningrida Bawinanga Liverpool Rv Blyth Rv	DEMED East Alligator River_WHNT Maningrida Bawinanga Liverpool Rv Blyth Rv	0.732425	1	161.73
47747	CP0004	CP0023	0.0869565	-0.150859	DEMED East Alligator River	WHNT Maningrida Bawinanga Liverpool Rv Blyth Rv	DEMED East Alligator River_WHNT Maningrida Bawinanga Liverpool Rv Blyth Rv	0.730163	1	161.73
45165	CP0003	CP0374	0.0821045	-0.14879	DEMED East Alligator River	WHNT Maningrida Bawinanga Liverpool Rv Blyth Rv	DEMED East Alligator River_WHNT Maningrida Bawinanga Liverpool Rv Blyth Rv	0.730839	1	161.73
33627	CP0218	CP0342	0.0732415	-0.145094	DEMED East Alligator River	WHNT Maningrida Bawinanga Liverpool Rv Blyth Rv	DEMED East Alligator River_WHNT Maningrida Bawinanga Liverpool Rv Blyth Rv	0.737128	1	161.73
47956	CP0229	CP0023	0.0807386	-0.14427	DEMED East Alligator River	WHNT Maningrida Bawinanga Liverpool Rv Blyth Rv	DEMED East Alligator River_WHNT Maningrida Bawinanga Liverpool Rv Blyth Rv	0.738776	1	161.73
52127	CP0217	CP0186	0.0765334	-0.142833	DEMED East Alligator River	WHNT Maningrida Bawinanga Liverpool Rv Blyth Rv	DEMED East Alligator River_WHNT Maningrida Bawinanga Liverpool Rv Blyth Rv	0.735752	1	161.73
47981	CP0229	CP0191	0.0778421	-0.142784	DEMED East Alligator River	WHNT Maningrida Bawinanga Liverpool Rv Blyth Rv	DEMED East Alligator River_WHNT Maningrida Bawinanga Liverpool Rv Blyth Rv	0.73597	1	161.73
33671	CP0218	CP0191	0.0748915	-0.141864	DEMED East Alligator River	WHNT Maningrida Bawinanga Liverpool Rv Blyth Rv	DEMED East Alligator River_WHNT Maningrida Bawinanga Liverpool Rv Blyth Rv	0.740955	1	161.73
52114	CP0217	CP0023	0.0792241	-0.141445	DEMED East Alligator River	WHNT Maningrida Bawinanga Liverpool Rv Blyth Rv	DEMED East Alligator River_WHNT Maningrida Bawinanga Liverpool Rv Blyth Rv	0.738035	1	161.73
52153	CP0217	CP0337	0.0812616	-0.140494	DEMED East Alligator River	WHNT Maningrida Bawinanga Liverpool Rv Blyth Rv	DEMED East Alligator River_WHNT Maningrida Bawinanga Liverpool Rv Blyth Rv	0.739981	1	161.73
47971	CP0229	CP0329	0.0759817	-0.136504	DEMED East Alligator River	WHNT Maningrida Bawinanga Liverpool Rv Blyth Rv	DEMED East Alligator River_WHNT Maningrida Bawinanga Liverpool Rv Blyth Rv	0.737443	1	161.73
33683	CP0218	CP0245	0.0746484	-0.133657	DEMED East Alligator River	WHNT Maningrida Bawinanga Liverpool Rv Blyth Rv	DEMED East Alligator River_WHNT Maningrida Bawinanga Liverpool Rv Blyth Rv	0.744681	1	161.73
47728	CP0004	CP0342	0.0782072	-0.131854	DEMED East Alligator River	WHNT Maningrida Bawinanga Liverpool Rv Blyth Rv	DEMED East Alligator River_WHNT Maningrida Bawinanga Liverpool Rv Blyth Rv	0.72691	1	161.73
52095	CP0217	CP0342	0.0715713	-0.130732	DEMED East Alligator River	WHNT Maningrida Bawinanga Liverpool Rv Blyth Rv	DEMED East Alligator River_WHNT Maningrida Bawinanga Liverpool Rv Blyth Rv	0.736785	1	161.73
45161	CP0003	CP0023	0.078009	-0.129293	DEMED East Alligator River	WHNT Maningrida Bawinanga Liverpool Rv Blyth Rv	DEMED East Alligator River_WHNT Maningrida Bawinanga Liverpool Rv Blyth Rv	0.733122	1	161.73
47760	CP0004	CP0186	0.0824295	-0.127279	DEMED East Alligator River	WHNT Maningrida Bawinanga Liverpool Rv Blyth Rv	DEMED East Alligator River_WHNT Maningrida Bawinanga Liverpool Rv Blyth Rv	0.734093	1	161.73
52164	CP0217	CP0338	0.0711685	-0.126115	DEMED East Alligator River	WHNT Maningrida Bawinanga Liverpool Rv Blyth Rv	DEMED East Alligator River_WHNT Maningrida Bawinanga Liverpool Rv Blyth Rv	0.739079	1	161.73
36796	CP0219	CP0023	0.0787288	-0.12467	DEMED East Alligator River	WHNT Maningrida Bawinanga Liverpool Rv Blyth Rv	DEMED East Alligator River_WHNT Maningrida Bawinanga Liverpool Rv Blyth Rv	0.736728	1	161.73
47786	CP0004	CP0337	0.0849092	-0.124418	DEMED East Alligator River	WHNT Maningrida Bawinanga Liverpool Rv Blyth Rv	DEMED East Alligator River_WHNT Maningrida Bawinanga Liverpool Rv Blyth Rv	0.73693	1	161.73
36835	CP0219	CP0337	0.084442	-0.122848	DEMED East Alligator River	WHNT Maningrida Bawinanga Liverpool Rv Blyth Rv	DEMED East Alligator River_WHNT Maningrida Bawinanga Liverpool Rv Blyth Rv	0.736881	1	161.73
47715	CP0004	CP0297	0.0827761	-0.121015	DEMED East Alligator River	WHNT Maningrida Bawinanga Liverpool Rv Blyth Rv	DEMED East Alligator River_WHNT Maningrida Bawinanga Liverpool Rv Blyth Rv	0.737755	1	161.73
50189	CP0230	CP0023	0.0756727	-0.119716	DEMED East Alligator River	WHNT Maningrida Bawinanga Liverpool Rv Blyth Rv	DEMED East Alligator River_WHNT Maningrida Bawinanga Liverpool Rv Blyth Rv	0.736771	1	161.73
47957	CP0229	CP0171	0.0726976	-0.119194	DEMED East Alligator River	WHNT Maningrida Bawinanga Liverpool Rv Blyth Rv	DEMED East Alligator River_WHNT Maningrida Bawinanga Liverpool Rv Blyth Rv	0.744017	1	161.73
33615	CP0218	CP0340	0.0697885	-0.118056	DEMED East Alligator River	WHNT Maningrida Bawinanga Liverpool Rv Blyth Rv	DEMED East Alligator River_WHNT Maningrida Bawinanga Liverpool Rv Blyth Rv	0.747966	1	161.73
52129	CP0217	CP0329	0.073193	-0.117333	DEMED East Alligator River	WHNT Maningrida Bawinanga Liverpool Rv Blyth Rv	DEMED East Alligator River_WHNT Maningrida Bawinanga Liverpool Rv Blyth Rv	0.74538	1	161.73
33694	CP0218	CP0253	0.0632889	-0.114518	DEMED East Alligator River	WHNT Maningrida Bawinanga Liverpool Rv Blyth Rv	DEMED East Alligator River_WHNT Maningrida Bawinanga Liverpool Rv Blyth Rv	0.743509	1	161.73
47797	CP0004	CP0338	0.0739865	-0.113072	DEMED East Alligator River	WHNT Maningrida Bawinanga Liverpool Rv Blyth Rv	DEMED East Alligator River_WHNT Maningrida Bawinanga Liverpool Rv Blyth Rv	0.732958	1	161.73
33682	CP0218	CP0037	0.0661619	-0.11192	DEMED East Alligator River	WHNT Maningrida Bawinanga Liverpool Rv Blyth Rv	DEMED East Alligator River_WHNT Maningrida Bawinanga Liverpool Rv Blyth Rv	0.747792	1	161.73
45200	CP0003	CP0337	0.0766951	-0.111702	DEMED East Alligator River	WHNT Maningrida Bawinanga Liverpool Rv Blyth Rv	DEMED East Alligator River_WHNT Maningrida Bawinanga Liverpool Rv Blyth Rv	0.735828	1	161.73
36846	CP0219	CP0338	0.0788615	-0.110172	DEMED East Alligator River	WHNT Maningrida Bawinanga Liverpool Rv Blyth Rv	DEMED East Alligator River_WHNT Maningrida Bawinanga Liverpool Rv Blyth Rv	0.731962	1	161.73
47968	CP0229	CP0033	0.0696751	-0.110109	DEMED East Alligator River	WHNT Maningrida Bawinanga Liverpool Rv Blyth Rv	DEMED East Alligator River_WHNT Maningrida Bawinanga Liverpool Rv Blyth Rv	0.746119	1	161.73
50204	CP0230	CP0329	0.079825	-0.108805	DEMED East Alligator River	WHNT Maningrida Bawinanga Liverpool Rv Blyth Rv	DEMED East Alligator River_WHNT Maningrida Bawinanga Liverpool Rv Blyth Rv	0.726991	1	161.73
33647	CP0218	CP0171	0.0699529	-0.108235	DEMED East Alligator River	WHNT Maningrida Bawinanga Liverpool Rv Blyth Rv	DEMED East Alligator River_WHNT Maningrida Bawinanga Liverpool Rv Blyth Rv	0.752718	1	161.73
47762	CP0004	CP0329	0.0752511	-0.108081	DEMED East Alligator River	WHNT Maningrida Bawinanga Liverpool Rv Blyth Rv	DEMED East Alligator River_WHNT Maningrida Bawinanga Liverpool Rv Blyth Rv	0.737169	1	161.73
36764	CP0219	CP0297	0.0791134	-0.106938	DEMED East Alligator River	WHNT Maningrida Bawinanga Liverpool Rv Blyth Rv	DEMED East Alligator River_WHNT Maningrida Bawinanga Liverpool Rv Blyth Rv	0.735448	1	161.73
48006	CP0229	CP0338	0.0657823	-0.103354	DEMED East Alligator River	WHNT Maningrida Bawinanga Liverpool Rv Blyth Rv	DEMED East Alligator River_WHNT Maningrida Bawinanga Liverpool Rv Blyth Rv	0.745412	1	161.73
33658	CP0218	CP0033	0.0662096	-0.102462	DEMED East Alligator River	WHNT Maningrida Bawinanga Liverpool Rv Blyth Rv	DEMED East Alligator River_WHNT Maningrida Bawinanga Liverpool Rv Blyth Rv	0.752751	1	161.73
50228	CP0230	CP0337	0.0762978	-0.0990066	DEMED East Alligator River	WHNT Maningrida Bawinanga Liverpool Rv Blyth Rv	DEMED East Alligator River_WHNT Maningrida Bawinanga Liverpool Rv Blyth Rv	0.742102	1	161.73
47925	CP0229	CP0340	0.0634949	-0.0982265	DEMED East Alligator River	WHNT Maningrida Bawinanga Liverpool Rv Blyth Rv	DEMED East Alligator River_WHNT Maningrida Bawinanga Liverpool Rv Blyth Rv	0.746201	1	161.73
47992	CP0229	CP0037	0.0656684	-0.0972789	DEMED East Alligator River	WHNT Maningrida Bawinanga Liverpool Rv Blyth Rv	DEMED East Alligator River_WHNT Maningrida Bawinanga Liverpool Rv Blyth Rv	0.748872	1	161.73
45129	CP0003	CP0297	0.0782012	-0.096214	DEMED East Alligator River	WHNT Maningrida Bawinanga Liverpool Rv Blyth Rv	DEMED East Alligator River_WHNT Maningrida Bawinanga Liverpool Rv Blyth Rv	0.734062	1	161.73
47993	CP0229	CP0245	0.0644056	-0.0946866	DEMED East Alligator River	WHNT Maningrida Bawinanga Liverpool Rv Blyth Rv	DEMED East Alligator River_WHNT Maningrida Bawinanga Liverpool Rv Blyth Rv	0.749414	1	161.73
52139	CP0217	CP0191	0.0658086	-0.0946453	DEMED East Alligator River	WHNT Maningrida Bawinanga Liverpool Rv Blyth Rv	DEMED East Alligator River_WHNT Maningrida Bawinanga Liverpool Rv Blyth Rv	0.749728	1	161.73
47716	CP0004	CP0340	0.0695274	-0.0941982	DEMED East Alligator River	WHNT Maningrida Bawinanga Liverpool Rv Blyth Rv	DEMED East Alligator River_WHNT Maningrida Bawinanga Liverpool Rv Blyth Rv	0.739453	1	161.73
33635	CP0218	CP0020	0.065284	-0.0937283	DEMED East Alligator River	WHNT Maningrida Bawinanga Liverpool Rv Blyth Rv	DEMED East Alligator River_WHNT Maningrida Bawinanga Liverpool Rv Blyth Rv	0.756267	1	161.73
45174	CP0003	CP0186	0.074422	-0.0937109	DEMED East Alligator River	WHNT Maningrida Bawinanga Liverpool Rv Blyth Rv	DEMED East Alligator River_WHNT Maningrida Bawinanga Liverpool Rv Blyth Rv	0.731665	1	161.73
36811	CP0219	CP0329	0.0752551	-0.0881029	DEMED East Alligator River	WHNT Maningrida Bawinanga Liverpool Rv Blyth Rv	DEMED East Alligator River_WHNT Maningrida Bawinanga Liverpool Rv Blyth Rv	0.741983	1	161.73
50157	CP0230	CP0297	0.0751622	-0.0873984	DEMED East Alligator River	WHNT Maningrida Bawinanga Liverpool Rv Blyth Rv	DEMED East Alligator River_WHNT Maningrida Bawinanga Liverpool Rv Blyth Rv	0.736572	1	161.73
52115	CP0217	CP0171	0.0664609	-0.0865319	DEMED East Alligator River	WHNT Maningrida Bawinanga Liverpool Rv Blyth Rv	DEMED East Alligator River_WHNT Maningrida Bawinanga Liverpool Rv Blyth Rv	0.755675	1	161.73
47772	CP0004	CP0191	0.0671736	-0.0845828	DEMED East Alligator River	WHNT Maningrida Bawinanga Liverpool Rv Blyth Rv	DEMED East Alligator River_WHNT Maningrida Bawinanga Liverpool Rv Blyth Rv	0.742441	1	161.73
50202	CP0230	CP0186	0.0744412	-0.0844785	DEMED East Alligator River	WHNT Maningrida Bawinanga Liverpool Rv Blyth Rv	DEMED East Alligator River_WHNT Maningrida Bawinanga Liverpool Rv Blyth Rv	0.737112	1	161.73
50239	CP0230	CP0338	0.0708976	-0.0843829	DEMED East Alligator River	WHNT Maningrida Bawinanga Liverpool Rv Blyth Rv	DEMED East Alligator River_WHNT Maningrida Bawinanga Liverpool Rv Blyth Rv	0.734361	1	161.73
52150	CP0217	CP0037	0.0625113	-0.0829925	DEMED East Alligator River	WHNT Maningrida Bawinanga Liverpool Rv Blyth Rv	DEMED East Alligator River_WHNT Maningrida Bawinanga Liverpool Rv Blyth Rv	0.753478	1	161.73
36777	CP0219	CP0342	0.0683915	-0.0816816	DEMED East Alligator River	WHNT Maningrida Bawinanga Liverpool Rv Blyth Rv	DEMED East Alligator River_WHNT Maningrida Bawinanga Liverpool Rv Blyth Rv	0.739189	1	161.73
50170	CP0230	CP0342	0.0732899	-0.08005	DEMED East Alligator River	WHNT Maningrida Bawinanga Liverpool Rv Blyth Rv	DEMED East Alligator River_WHNT Maningrida Bawinanga Liverpool Rv Blyth Rv	0.737604	1	161.73
52126	CP0217	CP0033	0.0619917	-0.0786249	DEMED East Alligator River	WHNT Maningrida Bawinanga Liverpool Rv Blyth Rv	DEMED East Alligator River_WHNT Maningrida Bawinanga Liverpool Rv Blyth Rv	0.754744	1	161.73
36808	CP0219	CP0033	0.0713	-0.077131	DEMED East Alligator River	WHNT Maningrida Bawinanga Liverpool Rv Blyth Rv	DEMED East Alligator River_WHNT Maningrida Bawinanga Liverpool Rv Blyth Rv	0.744598	1	161.73
36809	CP0219	CP0186	0.0708236	-0.0751748	DEMED East Alligator River	WHNT Maningrida Bawinanga Liverpool Rv Blyth Rv	DEMED East Alligator River_WHNT Maningrida Bawinanga Liverpool Rv Blyth Rv	0.744729	1	161.73
36821	CP0219	CP0191	0.0691585	-0.0751114	DEMED East Alligator River	WHNT Maningrida Bawinanga Liverpool Rv Blyth Rv	DEMED East Alligator River_WHNT Maningrida Bawinanga Liverpool Rv Blyth Rv	0.742867	1	161.73
45211	CP0003	CP0338	0.0719607	-0.074937	DEMED East Alligator River	WHNT Maningrida Bawinanga Liverpool Rv Blyth Rv	DEMED East Alligator River_WHNT Maningrida Bawinanga Liverpool Rv Blyth Rv	0.740142	1	161.73
52151	CP0217	CP0245	0.0628726	-0.0743703	DEMED East Alligator River	WHNT Maningrida Bawinanga Liverpool Rv Blyth Rv	DEMED East Alligator River_WHNT Maningrida Bawinanga Liverpool Rv Blyth Rv	0.757995	1	161.73
48004	CP0229	CP0253	0.0595131	-0.0739796	DEMED East Alligator River	WHNT Maningrida Bawinanga Liverpool Rv Blyth Rv	DEMED East Alligator River_WHNT Maningrida Bawinanga Liverpool Rv Blyth Rv	0.755185	1	161.73
50214	CP0230	CP0191	0.0707965	-0.0729493	DEMED East Alligator River	WHNT Maningrida Bawinanga Liverpool Rv Blyth Rv	DEMED East Alligator River_WHNT Maningrida Bawinanga Liverpool Rv Blyth Rv	0.740293	1	161.73
47783	CP0004	CP0037	0.0662574	-0.0721717	DEMED East Alligator River	WHNT Maningrida Bawinanga Liverpool Rv Blyth Rv	DEMED East Alligator River_WHNT Maningrida Bawinanga Liverpool Rv Blyth Rv	0.748511	1	161.73
52162	CP0217	CP0253	0.0554652	-0.071015	DEMED East Alligator River	WHNT Maningrida Bawinanga Liverpool Rv Blyth Rv	DEMED East Alligator River_WHNT Maningrida Bawinanga Liverpool Rv Blyth Rv	0.752575	1	161.73
52103	CP0217	CP0020	0.0601735	-0.0705041	DEMED East Alligator River	WHNT Maningrida Bawinanga Liverpool Rv Blyth Rv	DEMED East Alligator River_WHNT Maningrida Bawinanga Liverpool Rv Blyth Rv	0.757499	1	161.73
47795	CP0004	CP0253	0.064091	-0.068433	DEMED East Alligator River	WHNT Maningrida Bawinanga Liverpool Rv Blyth Rv	DEMED East Alligator River_WHNT Maningrida Bawinanga Liverpool Rv Blyth Rv	0.74842	1	161.73
47945	CP0229	CP0020	0.0609888	-0.0676871	DEMED East Alligator River	WHNT Maningrida Bawinanga Liverpool Rv Blyth Rv	DEMED East Alligator River_WHNT Maningrida Bawinanga Liverpool Rv Blyth Rv	0.759834	1	161.73
36765	CP0219	CP0340	0.0673164	-0.0667197	DEMED East Alligator River	WHNT Maningrida Bawinanga Liverpool Rv Blyth Rv	DEMED East Alligator River_WHNT Maningrida Bawinanga Liverpool Rv Blyth Rv	0.746165	1	161.73
45130	CP0003	CP0340	0.0663893	-0.0621079	DEMED East Alligator River	WHNT Maningrida Bawinanga Liverpool Rv Blyth Rv	DEMED East Alligator River_WHNT Maningrida Bawinanga Liverpool Rv Blyth Rv	0.742221	1	161.73
47759	CP0004	CP0033	0.0655708	-0.0619311	DEMED East Alligator River	WHNT Maningrida Bawinanga Liverpool Rv Blyth Rv	DEMED East Alligator River_WHNT Maningrida Bawinanga Liverpool Rv Blyth Rv	0.753342	1	161.73
45186	CP0003	CP0191	0.0684163	-0.0614035	DEMED East Alligator River	WHNT Maningrida Bawinanga Liverpool Rv Blyth Rv	DEMED East Alligator River_WHNT Maningrida Bawinanga Liverpool Rv Blyth Rv	0.744072	1	161.73
52083	CP0217	CP0340	0.0581627	-0.059296	DEMED East Alligator River	WHNT Maningrida Bawinanga Liverpool Rv Blyth Rv	DEMED East Alligator River_WHNT Maningrida Bawinanga Liverpool Rv Blyth Rv	0.761642	1	161.73
36797	CP0219	CP0171	0.0669199	-0.0581952	DEMED East Alligator River	WHNT Maningrida Bawinanga Liverpool Rv Blyth Rv	DEMED East Alligator River_WHNT Maningrida Bawinanga Liverpool Rv Blyth Rv	0.750317	1	161.73
45142	CP0003	CP0342	0.0647443	-0.0529781	DEMED East Alligator River	WHNT Maningrida Bawinanga Liverpool Rv Blyth Rv	DEMED East Alligator River_WHNT Maningrida Bawinanga Liverpool Rv Blyth Rv	0.744831	1	161.73
45176	CP0003	CP0329	0.066484	-0.0515171	DEMED East Alligator River	WHNT Maningrida Bawinanga Liverpool Rv Blyth Rv	DEMED East Alligator River_WHNT Maningrida Bawinanga Liverpool Rv Blyth Rv	0.747763	1	161.73
36833	CP0219	CP0245	0.0620839	-0.051494	DEMED East Alligator River	WHNT Maningrida Bawinanga Liverpool Rv Blyth Rv	DEMED East Alligator River_WHNT Maningrida Bawinanga Liverpool Rv Blyth Rv	0.749865	1	161.73
36844	CP0219	CP0253	0.0608242	-0.0512087	DEMED East Alligator River	WHNT Maningrida Bawinanga Liverpool Rv Blyth Rv	DEMED East Alligator River_WHNT Maningrida Bawinanga Liverpool Rv Blyth Rv	0.748965	1	161.73
45173	CP0003	CP0033	0.0649702	-0.0497186	DEMED East Alligator River	WHNT Maningrida Bawinanga Liverpool Rv Blyth Rv	DEMED East Alligator River_WHNT Maningrida Bawinanga Liverpool Rv Blyth Rv	0.747699	1	161.73
36832	CP0219	CP0037	0.0608132	-0.0484743	DEMED East Alligator River	WHNT Maningrida Bawinanga Liverpool Rv Blyth Rv	DEMED East Alligator River_WHNT Maningrida Bawinanga Liverpool Rv Blyth Rv	0.75036	1	161.73
47748	CP0004	CP0171	0.0636792	-0.0482026	DEMED East Alligator River	WHNT Maningrida Bawinanga Liverpool Rv Blyth Rv	DEMED East Alligator River_WHNT Maningrida Bawinanga Liverpool Rv Blyth Rv	0.759343	1	161.73
47784	CP0004	CP0245	0.0621051	-0.0474642	DEMED East Alligator River	WHNT Maningrida Bawinanga Liverpool Rv Blyth Rv	DEMED East Alligator River_WHNT Maningrida Bawinanga Liverpool Rv Blyth Rv	0.758079	1	161.73
47736	CP0004	CP0020	0.0574215	-0.0380859	DEMED East Alligator River	WHNT Maningrida Bawinanga Liverpool Rv Blyth Rv	DEMED East Alligator River_WHNT Maningrida Bawinanga Liverpool Rv Blyth Rv	0.758938	1	161.73
45209	CP0003	CP0253	0.0564574	-0.0367188	DEMED East Alligator River	WHNT Maningrida Bawinanga Liverpool Rv Blyth Rv	DEMED East Alligator River_WHNT Maningrida Bawinanga Liverpool Rv Blyth Rv	0.746663	1	161.73
50225	CP0230	CP0037	0.062095	-0.03665	DEMED East Alligator River	WHNT Maningrida Bawinanga Liverpool Rv Blyth Rv	DEMED East Alligator River_WHNT Maningrida Bawinanga Liverpool Rv Blyth Rv	0.75243	1	161.73
50201	CP0230	CP0033	0.0619485	-0.0350686	DEMED East Alligator River	WHNT Maningrida Bawinanga Liverpool Rv Blyth Rv	DEMED East Alligator River_WHNT Maningrida Bawinanga Liverpool Rv Blyth Rv	0.752836	1	161.73
50237	CP0230	CP0253	0.0541757	-0.033063	DEMED East Alligator River	WHNT Maningrida Bawinanga Liverpool Rv Blyth Rv	DEMED East Alligator River_WHNT Maningrida Bawinanga Liverpool Rv Blyth Rv	0.74658	1	161.73
45162	CP0003	CP0171	0.062364	-0.0300752	DEMED East Alligator River	WHNT Maningrida Bawinanga Liverpool Rv Blyth Rv	DEMED East Alligator River_WHNT Maningrida Bawinanga Liverpool Rv Blyth Rv	0.75562	1	161.73
36785	CP0219	CP0020	0.0595752	-0.0300573	DEMED East Alligator River	WHNT Maningrida Bawinanga Liverpool Rv Blyth Rv	DEMED East Alligator River_WHNT Maningrida Bawinanga Liverpool Rv Blyth Rv	0.759629	1	161.73
50190	CP0230	CP0171	0.0625904	-0.029237	DEMED East Alligator River	WHNT Maningrida Bawinanga Liverpool Rv Blyth Rv	DEMED East Alligator River_WHNT Maningrida Bawinanga Liverpool Rv Blyth Rv	0.756422	1	161.73
50226	CP0230	CP0245	0.0575954	-0.0252651	DEMED East Alligator River	WHNT Maningrida Bawinanga Liverpool Rv Blyth Rv	DEMED East Alligator River_WHNT Maningrida Bawinanga Liverpool Rv Blyth Rv	0.7545	1	161.73
45197	CP0003	CP0037	0.0546537	-0.0221736	DEMED East Alligator River	WHNT Maningrida Bawinanga Liverpool Rv Blyth Rv	DEMED East Alligator River_WHNT Maningrida Bawinanga Liverpool Rv Blyth Rv	0.753066	1	161.73
50178	CP0230	CP0020	0.0556256	-0.0193387	DEMED East Alligator River	WHNT Maningrida Bawinanga Liverpool Rv Blyth Rv	DEMED East Alligator River_WHNT Maningrida Bawinanga Liverpool Rv Blyth Rv	0.755896	1	161.73
45198	CP0003	CP0245	0.0546537	-0.009375	DEMED East Alligator River	WHNT Maningrida Bawinanga Liverpool Rv Blyth Rv	DEMED East Alligator River_WHNT Maningrida Bawinanga Liverpool Rv Blyth Rv	0.760642	1	161.73
50158	CP0230	CP0340	0.0570294	-0.00733458	DEMED East Alligator River	WHNT Maningrida Bawinanga Liverpool Rv Blyth Rv	DEMED East Alligator River_WHNT Maningrida Bawinanga Liverpool Rv Blyth Rv	0.763671	1	161.73
45150	CP0003	CP0020	0.051777	-0.00515303	DEMED East Alligator River	WHNT Maningrida Bawinanga Liverpool Rv Blyth Rv	DEMED East Alligator River_WHNT Maningrida Bawinanga Liverpool Rv Blyth Rv	0.759968	1	161.73
47796	CP0004	CP0256	0.0779127	-0.206284	DEMED East Alligator River	WHNT Tiwi Islands	DEMED East Alligator River_WHNT Tiwi Islands	0.750045	0	234.84
45210	CP0003	CP0256	0.077132	-0.205455	DEMED East Alligator River	WHNT Tiwi Islands	DEMED East Alligator River_WHNT Tiwi Islands	0.751675	0	234.84
48005	CP0229	CP0256	0.077118	-0.203516	DEMED East Alligator River	WHNT Tiwi Islands	DEMED East Alligator River_WHNT Tiwi Islands	0.751086	0	234.84
50238	CP0230	CP0256	0.0762421	-0.191602	DEMED East Alligator River	WHNT Tiwi Islands	DEMED East Alligator River_WHNT Tiwi Islands	0.756369	0	234.84
33522	CP0218	CP0078	0.0865871	-0.189241	DEMED East Alligator River	WHNT Tiwi Islands	DEMED East Alligator River_WHNT Tiwi Islands	0.72876	0	234.84
33533	CP0218	CP0054	0.0905804	-0.186414	DEMED East Alligator River	WHNT Tiwi Islands	DEMED East Alligator River_WHNT Tiwi Islands	0.733412	0	234.84
36845	CP0219	CP0256	0.0758397	-0.183502	DEMED East Alligator River	WHNT Tiwi Islands	DEMED East Alligator River_WHNT Tiwi Islands	0.75939	0	234.84
47843	CP0229	CP0054	0.0868464	-0.174351	DEMED East Alligator River	WHNT Tiwi Islands	DEMED East Alligator River_WHNT Tiwi Islands	0.7296	0	234.84
33534	CP0218	CP0167	0.0787004	-0.154126	DEMED East Alligator River	WHNT Tiwi Islands	DEMED East Alligator River_WHNT Tiwi Islands	0.738177	0	234.84
52001	CP0217	CP0054	0.084798	-0.153413	DEMED East Alligator River	WHNT Tiwi Islands	DEMED East Alligator River_WHNT Tiwi Islands	0.737905	0	234.84
47922	CP0229	CP0021	0.0836805	-0.151706	DEMED East Alligator River	WHNT Tiwi Islands	DEMED East Alligator River_WHNT Tiwi Islands	0.737819	0	234.84
33544	CP0218	CP0038	0.0789094	-0.151594	DEMED East Alligator River	WHNT Tiwi Islands	DEMED East Alligator River_WHNT Tiwi Islands	0.739346	0	234.84
52080	CP0217	CP0021	0.0815956	-0.150786	DEMED East Alligator River	WHNT Tiwi Islands	DEMED East Alligator River_WHNT Tiwi Islands	0.736083	0	234.84
33687	CP0218	CP0279	0.0777436	-0.149062	DEMED East Alligator River	WHNT Tiwi Islands	DEMED East Alligator River_WHNT Tiwi Islands	0.740011	0	234.84
47951	CP0229	CP0261	0.0766866	-0.141593	DEMED East Alligator River	WHNT Tiwi Islands	DEMED East Alligator River_WHNT Tiwi Islands	0.735757	0	234.84
51990	CP0217	CP0078	0.0786089	-0.141201	DEMED East Alligator River	WHNT Tiwi Islands	DEMED East Alligator River_WHNT Tiwi Islands	0.738091	0	234.84
33629	CP0218	CP0260	0.077368	-0.139931	DEMED East Alligator River	WHNT Tiwi Islands	DEMED East Alligator River_WHNT Tiwi Islands	0.744215	0	234.84
33660	CP0218	CP0248	0.076965	-0.137937	DEMED East Alligator River	WHNT Tiwi Islands	DEMED East Alligator River_WHNT Tiwi Islands	0.74578	0	234.84
33545	CP0218	CP0056	0.0768814	-0.136348	DEMED East Alligator River	WHNT Tiwi Islands	DEMED East Alligator River_WHNT Tiwi Islands	0.745443	0	234.84
33593	CP0218	CP0069	0.0755194	-0.13499	DEMED East Alligator River	WHNT Tiwi Islands	DEMED East Alligator River_WHNT Tiwi Islands	0.745348	0	234.84
47832	CP0229	CP0078	0.0750316	-0.133356	DEMED East Alligator River	WHNT Tiwi Islands	DEMED East Alligator River_WHNT Tiwi Islands	0.739288	0	234.84
33641	CP0218	CP0261	0.0768257	-0.132812	DEMED East Alligator River	WHNT Tiwi Islands	DEMED East Alligator River_WHNT Tiwi Islands	0.747379	0	234.84
33648	CP0218	CP0195	0.0732149	-0.131093	DEMED East Alligator River	WHNT Tiwi Islands	DEMED East Alligator River_WHNT Tiwi Islands	0.744744	0	234.84
47939	CP0229	CP0260	0.0736252	-0.129005	DEMED East Alligator River	WHNT Tiwi Islands	DEMED East Alligator River_WHNT Tiwi Islands	0.739779	0	234.84
33592	CP0218	CP0049	0.0722413	-0.127608	DEMED East Alligator River	WHNT Tiwi Islands	DEMED East Alligator River_WHNT Tiwi Islands	0.746252	0	234.84
33568	CP0218	CP0041	0.072537	-0.127601	DEMED East Alligator River	WHNT Tiwi Islands	DEMED East Alligator River_WHNT Tiwi Islands	0.74594	0	234.84
33613	CP0218	CP0189	0.0683174	-0.127178	DEMED East Alligator River	WHNT Tiwi Islands	DEMED East Alligator River_WHNT Tiwi Islands	0.742997	0	234.84
33569	CP0218	CP0067	0.0707308	-0.126042	DEMED East Alligator River	WHNT Tiwi Islands	DEMED East Alligator River_WHNT Tiwi Islands	0.744573	0	234.84
33618	CP0218	CP0287	0.0735641	-0.125522	DEMED East Alligator River	WHNT Tiwi Islands	DEMED East Alligator River_WHNT Tiwi Islands	0.748052	0	234.84
33612	CP0218	CP0021	0.0752941	-0.125261	DEMED East Alligator River	WHNT Tiwi Islands	DEMED East Alligator River_WHNT Tiwi Islands	0.749593	0	234.84
33695	CP0218	CP0256	0.0658585	-0.124511	DEMED East Alligator River	WHNT Tiwi Islands	DEMED East Alligator River_WHNT Tiwi Islands	0.776823	0	234.84
36683	CP0219	CP0054	0.0841003	-0.124118	DEMED East Alligator River	WHNT Tiwi Islands	DEMED East Alligator River_WHNT Tiwi Islands	0.7329	0	234.84
52013	CP0217	CP0056	0.0779526	-0.123892	DEMED East Alligator River	WHNT Tiwi Islands	DEMED East Alligator River_WHNT Tiwi Islands	0.74688	0	234.84
52163	CP0217	CP0256	0.0641886	-0.122738	DEMED East Alligator River	WHNT Tiwi Islands	DEMED East Alligator River_WHNT Tiwi Islands	0.777153	0	234.84
47879	CP0229	CP0067	0.0729544	-0.122609	DEMED East Alligator River	WHNT Tiwi Islands	DEMED East Alligator River_WHNT Tiwi Islands	0.74294	0	234.84
47634	CP0004	CP0054	0.0803911	-0.12182	DEMED East Alligator River	WHNT Tiwi Islands	DEMED East Alligator River_WHNT Tiwi Islands	0.735198	0	234.84
47713	CP0004	CP0021	0.0824724	-0.121252	DEMED East Alligator River	WHNT Tiwi Islands	DEMED East Alligator River_WHNT Tiwi Islands	0.736995	0	234.84
33664	CP0218	CP0265	0.0712996	-0.120146	DEMED East Alligator River	WHNT Tiwi Islands	DEMED East Alligator River_WHNT Tiwi Islands	0.748466	0	234.84
47855	CP0229	CP0056	0.0765758	-0.119898	DEMED East Alligator River	WHNT Tiwi Islands	DEMED East Alligator River_WHNT Tiwi Islands	0.747426	0	234.84
47761	CP0004	CP0248	0.0755814	-0.118553	DEMED East Alligator River	WHNT Tiwi Islands	DEMED East Alligator River_WHNT Tiwi Islands	0.740007	0	234.84
33625	CP0218	CP0192	0.0712987	-0.118449	DEMED East Alligator River	WHNT Tiwi Islands	DEMED East Alligator River_WHNT Tiwi Islands	0.749363	0	234.84
36672	CP0219	CP0078	0.0846112	-0.118312	DEMED East Alligator River	WHNT Tiwi Islands	DEMED East Alligator River_WHNT Tiwi Islands	0.73435	0	234.84
33557	CP0218	CP0064	0.0694946	-0.117718	DEMED East Alligator River	WHNT Tiwi Islands	DEMED East Alligator River_WHNT Tiwi Islands	0.747924	0	234.84
47623	CP0004	CP0078	0.080905	-0.11659	DEMED East Alligator River	WHNT Tiwi Islands	DEMED East Alligator River_WHNT Tiwi Islands	0.739186	0	234.84
47868	CP0229	CP0178	0.0686913	-0.116564	DEMED East Alligator River	WHNT Tiwi Islands	DEMED East Alligator River_WHNT Tiwi Islands	0.741685	0	234.84
33520	CP0218	CP0022	0.0700072	-0.116319	DEMED East Alligator River	WHNT Tiwi Islands	DEMED East Alligator River_WHNT Tiwi Islands	0.748915	0	234.84
47974	CP0229	CP0265	0.0709514	-0.115306	DEMED East Alligator River	WHNT Tiwi Islands	DEMED East Alligator River_WHNT Tiwi Islands	0.744358	0	234.84
33521	CP0218	CP0052	0.0730164	-0.114598	DEMED East Alligator River	WHNT Tiwi Islands	DEMED East Alligator River_WHNT Tiwi Islands	0.752666	0	234.84
47970	CP0229	CP0248	0.0748275	-0.114555	DEMED East Alligator River	WHNT Tiwi Islands	DEMED East Alligator River_WHNT Tiwi Islands	0.74891	0	234.84
52128	CP0217	CP0248	0.073845	-0.114384	DEMED East Alligator River	WHNT Tiwi Islands	DEMED East Alligator River_WHNT Tiwi Islands	0.747545	0	234.84
52061	CP0217	CP0069	0.0714932	-0.113559	DEMED East Alligator River	WHNT Tiwi Islands	DEMED East Alligator River_WHNT Tiwi Islands	0.746335	0	234.84
33532	CP0218	CP0024	0.0712477	-0.113021	DEMED East Alligator River	WHNT Tiwi Islands	DEMED East Alligator River_WHNT Tiwi Islands	0.751989	0	234.84
47856	CP0229	CP0169	0.0706778	-0.112876	DEMED East Alligator River	WHNT Tiwi Islands	DEMED East Alligator River_WHNT Tiwi Islands	0.745469	0	234.84
33684	CP0218	CP0254	0.0688347	-0.112561	DEMED East Alligator River	WHNT Tiwi Islands	DEMED East Alligator River_WHNT Tiwi Islands	0.750768	0	234.84
52037	CP0217	CP0067	0.0683342	-0.111149	DEMED East Alligator River	WHNT Tiwi Islands	DEMED East Alligator River_WHNT Tiwi Islands	0.744426	0	234.84
36810	CP0219	CP0248	0.0748053	-0.110147	DEMED East Alligator River	WHNT Tiwi Islands	DEMED East Alligator River_WHNT Tiwi Islands	0.743706	0	234.84
52012	CP0217	CP0038	0.0700072	-0.110014	DEMED East Alligator River	WHNT Tiwi Islands	DEMED East Alligator River_WHNT Tiwi Islands	0.74602	0	234.84
33546	CP0218	CP0169	0.0738997	-0.10993	DEMED East Alligator River	WHNT Tiwi Islands	DEMED East Alligator River_WHNT Tiwi Islands	0.756838	0	234.84
33581	CP0218	CP0068	0.0726419	-0.109896	DEMED East Alligator River	WHNT Tiwi Islands	DEMED East Alligator River_WHNT Tiwi Islands	0.75524	0	234.84
33603	CP0218	CP0050	0.0683668	-0.10982	DEMED East Alligator River	WHNT Tiwi Islands	DEMED East Alligator River_WHNT Tiwi Islands	0.750497	0	234.84
47923	CP0229	CP0189	0.0708733	-0.10946	DEMED East Alligator River	WHNT Tiwi Islands	DEMED East Alligator River_WHNT Tiwi Islands	0.748237	0	234.84
45048	CP0003	CP0054	0.0793995	-0.109044	DEMED East Alligator River	WHNT Tiwi Islands	DEMED East Alligator River_WHNT Tiwi Islands	0.735938	0	234.84
47986	CP0229	CP0266	0.0732766	-0.108747	DEMED East Alligator River	WHNT Tiwi Islands	DEMED East Alligator River_WHNT Tiwi Islands	0.749683	0	234.84
47958	CP0229	CP0195	0.0698096	-0.107947	DEMED East Alligator River	WHNT Tiwi Islands	DEMED East Alligator River_WHNT Tiwi Islands	0.7466	0	234.84
52109	CP0217	CP0261	0.0706394	-0.107776	DEMED East Alligator River	WHNT Tiwi Islands	DEMED East Alligator River_WHNT Tiwi Islands	0.747872	0	234.84
47902	CP0229	CP0049	0.0693642	-0.107679	DEMED East Alligator River	WHNT Tiwi Islands	DEMED East Alligator River_WHNT Tiwi Islands	0.747742	0	234.84
47913	CP0229	CP0050	0.0713251	-0.106216	DEMED East Alligator River	WHNT Tiwi Islands	DEMED East Alligator River_WHNT Tiwi Islands	0.75	0	234.84
50076	CP0230	CP0054	0.0792419	-0.105677	DEMED East Alligator River	WHNT Tiwi Islands	DEMED East Alligator River_WHNT Tiwi Islands	0.738357	0	234.84
47878	CP0229	CP0041	0.067714	-0.105586	DEMED East Alligator River	WHNT Tiwi Islands	DEMED East Alligator River_WHNT Tiwi Islands	0.746659	0	234.84
47982	CP0229	CP0249	0.0708576	-0.105479	DEMED East Alligator River	WHNT Tiwi Islands	DEMED East Alligator River_WHNT Tiwi Islands	0.749637	0	234.84
47844	CP0229	CP0167	0.0666185	-0.105416	DEMED East Alligator River	WHNT Tiwi Islands	DEMED East Alligator River_WHNT Tiwi Islands	0.745712	0	234.84
33580	CP0218	CP0048	0.0672938	-0.105108	DEMED East Alligator River	WHNT Tiwi Islands	DEMED East Alligator River_WHNT Tiwi Islands	0.752261	0	234.84
50155	CP0230	CP0021	0.081828	-0.103659	DEMED East Alligator River	WHNT Tiwi Islands	DEMED East Alligator River_WHNT Tiwi Islands	0.733111	0	234.84
33676	CP0218	CP0266	0.0683544	-0.103646	DEMED East Alligator River	WHNT Tiwi Islands	DEMED East Alligator River_WHNT Tiwi Islands	0.753978	0	234.84
33672	CP0218	CP0249	0.0713249	-0.102756	DEMED East Alligator River	WHNT Tiwi Islands	DEMED East Alligator River_WHNT Tiwi Islands	0.757804	0	234.84
52097	CP0217	CP0260	0.0682847	-0.102389	DEMED East Alligator River	WHNT Tiwi Islands	DEMED East Alligator River_WHNT Tiwi Islands	0.748596	0	234.84
33698	CP0218	CP0282	0.0669327	-0.102051	DEMED East Alligator River	WHNT Tiwi Islands	DEMED East Alligator River_WHNT Tiwi Islands	0.752857	0	234.84
47742	CP0004	CP0261	0.0758234	-0.101761	DEMED East Alligator River	WHNT Tiwi Islands	DEMED East Alligator River_WHNT Tiwi Islands	0.741947	0	234.84
47903	CP0229	CP0069	0.0683297	-0.101402	DEMED East Alligator River	WHNT Tiwi Islands	DEMED East Alligator River_WHNT Tiwi Islands	0.750452	0	234.84
48008	CP0229	CP0282	0.0697041	-0.0998632	DEMED East Alligator River	WHNT Tiwi Islands	DEMED East Alligator River_WHNT Tiwi Islands	0.751316	0	234.84
36762	CP0219	CP0021	0.0776874	-0.0998087	DEMED East Alligator River	WHNT Tiwi Islands	DEMED East Alligator River_WHNT Tiwi Islands	0.73785	0	234.84
33652	CP0218	CP0264	0.0684363	-0.0980222	DEMED East Alligator River	WHNT Tiwi Islands	DEMED East Alligator River_WHNT Tiwi Islands	0.757223	0	234.84
47854	CP0229	CP0038	0.064318	-0.097752	DEMED East Alligator River	WHNT Tiwi Islands	DEMED East Alligator River_WHNT Tiwi Islands	0.747245	0	234.84
52132	CP0217	CP0265	0.0680051	-0.0970327	DEMED East Alligator River	WHNT Tiwi Islands	DEMED East Alligator River_WHNT Tiwi Islands	0.751402	0	234.84
47935	CP0229	CP0192	0.0720524	-0.0967577	DEMED East Alligator River	WHNT Tiwi Islands	DEMED East Alligator River_WHNT Tiwi Islands	0.753912	0	234.84
33556	CP0218	CP0039	0.0690403	-0.0964608	DEMED East Alligator River	WHNT Tiwi Islands	DEMED East Alligator River_WHNT Tiwi Islands	0.758359	0	234.84
52036	CP0217	CP0041	0.0676311	-0.0963896	DEMED East Alligator River	WHNT Tiwi Islands	DEMED East Alligator River_WHNT Tiwi Islands	0.750995	0	234.84
52116	CP0217	CP0195	0.0657345	-0.0956134	DEMED East Alligator River	WHNT Tiwi Islands	DEMED East Alligator River_WHNT Tiwi Islands	0.750136	0	234.84
33604	CP0218	CP0073	0.0678823	-0.0951803	DEMED East Alligator River	WHNT Tiwi Islands	DEMED East Alligator River_WHNT Tiwi Islands	0.757989	0	234.84
52086	CP0217	CP0287	0.0708061	-0.094863	DEMED East Alligator River	WHNT Tiwi Islands	DEMED East Alligator River_WHNT Tiwi Islands	0.755447	0	234.84
52140	CP0217	CP0249	0.0711426	-0.0947387	DEMED East Alligator River	WHNT Tiwi Islands	DEMED East Alligator River_WHNT Tiwi Islands	0.756459	0	234.84
52155	CP0217	CP0279	0.0675725	-0.0946685	DEMED East Alligator River	WHNT Tiwi Islands	DEMED East Alligator River_WHNT Tiwi Islands	0.752355	0	234.84
47997	CP0229	CP0279	0.0681859	-0.0944104	DEMED East Alligator River	WHNT Tiwi Islands	DEMED East Alligator River_WHNT Tiwi Islands	0.752758	0	234.84
52081	CP0217	CP0189	0.067548	-0.0935792	DEMED East Alligator River	WHNT Tiwi Islands	DEMED East Alligator River_WHNT Tiwi Islands	0.752807	0	234.84
47890	CP0229	CP0048	0.0662563	-0.0934946	DEMED East Alligator River	WHNT Tiwi Islands	DEMED East Alligator River_WHNT Tiwi Islands	0.750815	0	234.84
33558	CP0218	CP0178	0.0662814	-0.0923611	DEMED East Alligator River	WHNT Tiwi Islands	DEMED East Alligator River_WHNT Tiwi Islands	0.758172	0	234.84
33617	CP0218	CP0258	0.0651112	-0.0921875	DEMED East Alligator River	WHNT Tiwi Islands	DEMED East Alligator River_WHNT Tiwi Islands	0.756647	0	234.84
52000	CP0217	CP0024	0.0663284	-0.0915301	DEMED East Alligator River	WHNT Tiwi Islands	DEMED East Alligator River_WHNT Tiwi Islands	0.752447	0	234.84
47659	CP0004	CP0178	0.0737927	-0.0909239	DEMED East Alligator River	WHNT Tiwi Islands	DEMED East Alligator River_WHNT Tiwi Islands	0.745252	0	234.84
47622	CP0004	CP0052	0.072372	-0.0905088	DEMED East Alligator River	WHNT Tiwi Islands	DEMED East Alligator River_WHNT Tiwi Islands	0.744798	0	234.84
51989	CP0217	CP0052	0.0664494	-0.0899317	DEMED East Alligator River	WHNT Tiwi Islands	DEMED East Alligator River_WHNT Tiwi Islands	0.753485	0	234.84
47705	CP0004	CP0073	0.0742682	-0.0897394	DEMED East Alligator River	WHNT Tiwi Islands	DEMED East Alligator River_WHNT Tiwi Islands	0.747109	0	234.84
45127	CP0003	CP0021	0.0773131	-0.0887147	DEMED East Alligator River	WHNT Tiwi Islands	DEMED East Alligator River_WHNT Tiwi Islands	0.73728	0	234.84
52060	CP0217	CP0049	0.0647964	-0.0881148	DEMED East Alligator River	WHNT Tiwi Islands	DEMED East Alligator River_WHNT Tiwi Islands	0.753122	0	234.84
45037	CP0003	CP0078	0.0788427	-0.0880788	DEMED East Alligator River	WHNT Tiwi Islands	DEMED East Alligator River_WHNT Tiwi Islands	0.738969	0	234.84
33570	CP0218	CP0185	0.0624549	-0.0870923	DEMED East Alligator River	WHNT Tiwi Islands	DEMED East Alligator River_WHNT Tiwi Islands	0.75704	0	234.84
47831	CP0229	CP0052	0.0656182	-0.0860014	DEMED East Alligator River	WHNT Tiwi Islands	DEMED East Alligator River_WHNT Tiwi Islands	0.75461	0	234.84
47928	CP0229	CP0287	0.0648903	-0.0858465	DEMED East Alligator River	WHNT Tiwi Islands	DEMED East Alligator River_WHNT Tiwi Islands	0.75503	0	234.84
52026	CP0217	CP0178	0.0651584	-0.0853825	DEMED East Alligator River	WHNT Tiwi Islands	DEMED East Alligator River_WHNT Tiwi Islands	0.754932	0	234.84
47880	CP0229	CP0185	0.0659321	-0.0850919	DEMED East Alligator River	WHNT Tiwi Islands	DEMED East Alligator River_WHNT Tiwi Islands	0.755419	0	234.84
47914	CP0229	CP0073	0.0666546	-0.0849217	DEMED East Alligator River	WHNT Tiwi Islands	DEMED East Alligator River_WHNT Tiwi Islands	0.756232	0	234.84
52002	CP0217	CP0167	0.0652921	-0.0846967	DEMED East Alligator River	WHNT Tiwi Islands	DEMED East Alligator River_WHNT Tiwi Islands	0.755019	0	234.84
47927	CP0229	CP0258	0.0627941	-0.0845839	DEMED East Alligator River	WHNT Tiwi Islands	DEMED East Alligator River_WHNT Tiwi Islands	0.752624	0	234.84
47765	CP0004	CP0265	0.0694018	-0.0843099	DEMED East Alligator River	WHNT Tiwi Islands	DEMED East Alligator River_WHNT Tiwi Islands	0.744985	0	234.84
47830	CP0229	CP0022	0.0617195	-0.0837884	DEMED East Alligator River	WHNT Tiwi Islands	DEMED East Alligator River_WHNT Tiwi Islands	0.752127	0	234.84
47994	CP0229	CP0254	0.063449	-0.0832199	DEMED East Alligator River	WHNT Tiwi Islands	DEMED East Alligator River_WHNT Tiwi Islands	0.753706	0	234.84
52071	CP0217	CP0050	0.0641769	-0.0832196	DEMED East Alligator River	WHNT Tiwi Islands	DEMED East Alligator River_WHNT Tiwi Islands	0.75417	0	234.84
47867	CP0229	CP0064	0.0653784	-0.0828795	DEMED East Alligator River	WHNT Tiwi Islands	DEMED East Alligator River_WHNT Tiwi Islands	0.756095	0	234.84
47749	CP0004	CP0195	0.0702232	-0.082789	DEMED East Alligator River	WHNT Tiwi Islands	DEMED East Alligator River_WHNT Tiwi Islands	0.746416	0	234.84
52093	CP0217	CP0192	0.0668854	-0.0825309	DEMED East Alligator River	WHNT Tiwi Islands	DEMED East Alligator River_WHNT Tiwi Islands	0.758156	0	234.84
36684	CP0219	CP0167	0.0716988	-0.0814768	DEMED East Alligator River	WHNT Tiwi Islands	DEMED East Alligator River_WHNT Tiwi Islands	0.742569	0	234.84
52152	CP0217	CP0254	0.0602824	-0.0814549	DEMED East Alligator River	WHNT Tiwi Islands	DEMED East Alligator River_WHNT Tiwi Islands	0.752082	0	234.84
47947	CP0229	CP0194	0.0638683	-0.0809426	DEMED East Alligator River	WHNT Tiwi Islands	DEMED East Alligator River_WHNT Tiwi Islands	0.756106	0	234.84
47669	CP0004	CP0041	0.0692085	-0.0808344	DEMED East Alligator River	WHNT Tiwi Islands	DEMED East Alligator River_WHNT Tiwi Islands	0.747199	0	234.84
36743	CP0219	CP0069	0.0706688	-0.0803059	DEMED East Alligator River	WHNT Tiwi Islands	DEMED East Alligator River_WHNT Tiwi Islands	0.742383	0	234.84
47842	CP0229	CP0024	0.0611543	-0.0798706	DEMED East Alligator River	WHNT Tiwi Islands	DEMED East Alligator River_WHNT Tiwi Islands	0.753121	0	234.84
52072	CP0217	CP0073	0.0649539	-0.0797546	DEMED East Alligator River	WHNT Tiwi Islands	DEMED East Alligator River_WHNT Tiwi Islands	0.757192	0	234.84
45175	CP0003	CP0248	0.0671872	-0.0796519	DEMED East Alligator River	WHNT Tiwi Islands	DEMED East Alligator River_WHNT Tiwi Islands	0.752678	0	234.84
36822	CP0219	CP0249	0.0717651	-0.0791202	DEMED East Alligator River	WHNT Tiwi Islands	DEMED East Alligator River_WHNT Tiwi Islands	0.752084	0	234.84
33582	CP0218	CP0188	0.0618893	-0.0787456	DEMED East Alligator River	WHNT Tiwi Islands	DEMED East Alligator River_WHNT Tiwi Islands	0.76131	0	234.84
47694	CP0004	CP0069	0.0687285	-0.078604	DEMED East Alligator River	WHNT Tiwi Islands	DEMED East Alligator River_WHNT Tiwi Islands	0.747875	0	234.84
52048	CP0217	CP0048	0.0637912	-0.0785519	DEMED East Alligator River	WHNT Tiwi Islands	DEMED East Alligator River_WHNT Tiwi Islands	0.756796	0	234.84
52166	CP0217	CP0282	0.0646685	-0.0784983	DEMED East Alligator River	WHNT Tiwi Islands	DEMED East Alligator River_WHNT Tiwi Islands	0.756767	0	234.84
36775	CP0219	CP0192	0.069873	-0.0780432	DEMED East Alligator River	WHNT Tiwi Islands	DEMED East Alligator River_WHNT Tiwi Islands	0.749274	0	234.84
36791	CP0219	CP0261	0.071261	-0.0780356	DEMED East Alligator River	WHNT Tiwi Islands	DEMED East Alligator River_WHNT Tiwi Islands	0.74319	0	234.84
47785	CP0004	CP0254	0.0678242	-0.078013	DEMED East Alligator River	WHNT Tiwi Islands	DEMED East Alligator River_WHNT Tiwi Islands	0.74688	0	234.84
45140	CP0003	CP0192	0.0684009	-0.0763798	DEMED East Alligator River	WHNT Tiwi Islands	DEMED East Alligator River_WHNT Tiwi Islands	0.749227	0	234.84
45199	CP0003	CP0254	0.0699313	-0.0761413	DEMED East Alligator River	WHNT Tiwi Islands	DEMED East Alligator River_WHNT Tiwi Islands	0.73699	0	234.84
50146	CP0230	CP0050	0.0724219	-0.0761413	DEMED East Alligator River	WHNT Tiwi Islands	DEMED East Alligator River_WHNT Tiwi Islands	0.73966	0	234.84
47773	CP0004	CP0249	0.0703508	-0.0758075	DEMED East Alligator River	WHNT Tiwi Islands	DEMED East Alligator River_WHNT Tiwi Islands	0.752772	0	234.84
52024	CP0217	CP0039	0.065556	-0.0756849	DEMED East Alligator River	WHNT Tiwi Islands	DEMED East Alligator River_WHNT Tiwi Islands	0.761137	0	234.84
50065	CP0230	CP0078	0.0748827	-0.0752351	DEMED East Alligator River	WHNT Tiwi Islands	DEMED East Alligator River_WHNT Tiwi Islands	0.743775	0	234.84
36708	CP0219	CP0178	0.0681449	-0.0751592	DEMED East Alligator River	WHNT Tiwi Islands	DEMED East Alligator River_WHNT Tiwi Islands	0.742564	0	234.84
47891	CP0229	CP0068	0.0650877	-0.0744717	DEMED East Alligator River	WHNT Tiwi Islands	DEMED East Alligator River_WHNT Tiwi Islands	0.760351	0	234.84
36826	CP0219	CP0266	0.0676773	-0.0742985	DEMED East Alligator River	WHNT Tiwi Islands	DEMED East Alligator River_WHNT Tiwi Islands	0.742646	0	234.84
36814	CP0219	CP0265	0.0718789	-0.0740446	DEMED East Alligator River	WHNT Tiwi Islands	DEMED East Alligator River_WHNT Tiwi Islands	0.747163	0	234.84
52014	CP0217	CP0169	0.0649728	-0.0728454	DEMED East Alligator River	WHNT Tiwi Islands	DEMED East Alligator River_WHNT Tiwi Islands	0.76098	0	234.84
33637	CP0218	CP0194	0.060217	-0.0726704	DEMED East Alligator River	WHNT Tiwi Islands	DEMED East Alligator River_WHNT Tiwi Islands	0.762387	0	234.84
36719	CP0219	CP0067	0.0678945	-0.0725909	DEMED East Alligator River	WHNT Tiwi Islands	DEMED East Alligator River_WHNT Tiwi Islands	0.743861	0	234.84
51988	CP0217	CP0022	0.0625453	-0.0724761	DEMED East Alligator River	WHNT Tiwi Islands	DEMED East Alligator River_WHNT Tiwi Islands	0.758249	0	234.84
50184	CP0230	CP0261	0.0734392	-0.0724547	DEMED East Alligator River	WHNT Tiwi Islands	DEMED East Alligator River_WHNT Tiwi Islands	0.742692	0	234.84
36670	CP0219	CP0022	0.0698808	-0.0721123	DEMED East Alligator River	WHNT Tiwi Islands	DEMED East Alligator River_WHNT Tiwi Islands	0.746118	0	234.84
36694	CP0219	CP0038	0.0668589	-0.0711783	DEMED East Alligator River	WHNT Tiwi Islands	DEMED East Alligator River_WHNT Tiwi Islands	0.743648	0	234.84
47681	CP0004	CP0048	0.0668478	-0.0705421	DEMED East Alligator River	WHNT Tiwi Islands	DEMED East Alligator River_WHNT Tiwi Islands	0.750362	0	234.84
47718	CP0004	CP0258	0.0670168	-0.070517	DEMED East Alligator River	WHNT Tiwi Islands	DEMED East Alligator River_WHNT Tiwi Islands	0.751223	0	234.84
47866	CP0229	CP0039	0.0654611	-0.0703285	DEMED East Alligator River	WHNT Tiwi Islands	DEMED East Alligator River_WHNT Tiwi Islands	0.764105	0	234.84
50203	CP0230	CP0248	0.0657728	-0.0701403	DEMED East Alligator River	WHNT Tiwi Islands	DEMED East Alligator River_WHNT Tiwi Islands	0.756478	0	234.84
47738	CP0004	CP0194	0.0691653	-0.0689542	DEMED East Alligator River	WHNT Tiwi Islands	DEMED East Alligator River_WHNT Tiwi Islands	0.753938	0	234.84
47635	CP0004	CP0167	0.0674015	-0.0684776	DEMED East Alligator River	WHNT Tiwi Islands	DEMED East Alligator River_WHNT Tiwi Islands	0.751626	0	234.84
47726	CP0004	CP0192	0.0680991	-0.0683159	DEMED East Alligator River	WHNT Tiwi Islands	DEMED East Alligator River_WHNT Tiwi Islands	0.752276	0	234.84
47753	CP0004	CP0264	0.064557	-0.0681969	DEMED East Alligator River	WHNT Tiwi Islands	DEMED East Alligator River_WHNT Tiwi Islands	0.755696	0	234.84
50168	CP0230	CP0192	0.0664367	-0.0678689	DEMED East Alligator River	WHNT Tiwi Islands	DEMED East Alligator River_WHNT Tiwi Islands	0.752042	0	234.84
47777	CP0004	CP0266	0.0678979	-0.0675896	DEMED East Alligator River	WHNT Tiwi Islands	DEMED East Alligator River_WHNT Tiwi Islands	0.752399	0	234.84
52144	CP0217	CP0266	0.0617642	-0.0675307	DEMED East Alligator River	WHNT Tiwi Islands	DEMED East Alligator River_WHNT Tiwi Islands	0.760369	0	234.84
47892	CP0229	CP0188	0.0595691	-0.0674061	DEMED East Alligator River	WHNT Tiwi Islands	DEMED East Alligator River_WHNT Tiwi Islands	0.758555	0	234.84
52085	CP0217	CP0258	0.0627152	-0.0674061	DEMED East Alligator River	WHNT Tiwi Islands	DEMED East Alligator River_WHNT Tiwi Islands	0.761374	0	234.84
36798	CP0219	CP0195	0.0703563	-0.0670498	DEMED East Alligator River	WHNT Tiwi Islands	DEMED East Alligator River_WHNT Tiwi Islands	0.749141	0	234.84
50215	CP0230	CP0249	0.0656035	-0.0666886	DEMED East Alligator River	WHNT Tiwi Islands	DEMED East Alligator River_WHNT Tiwi Islands	0.75299	0	234.84
47683	CP0004	CP0188	0.0683095	-0.06621	DEMED East Alligator River	WHNT Tiwi Islands	DEMED East Alligator River_WHNT Tiwi Islands	0.75376	0	234.84
47693	CP0004	CP0049	0.0645686	-0.065918	DEMED East Alligator River	WHNT Tiwi Islands	DEMED East Alligator River_WHNT Tiwi Islands	0.750136	0	234.84
47646	CP0004	CP0056	0.0686788	-0.0658322	DEMED East Alligator River	WHNT Tiwi Islands	DEMED East Alligator River_WHNT Tiwi Islands	0.754112	0	234.84
45167	CP0003	CP0264	0.0655827	-0.0657895	DEMED East Alligator River	WHNT Tiwi Islands	DEMED East Alligator River_WHNT Tiwi Islands	0.758717	0	234.84
47719	CP0004	CP0287	0.0698476	-0.0655229	DEMED East Alligator River	WHNT Tiwi Islands	DEMED East Alligator River_WHNT Tiwi Islands	0.755896	0	234.84
36742	CP0219	CP0049	0.065429	-0.0650859	DEMED East Alligator River	WHNT Tiwi Islands	DEMED East Alligator River_WHNT Tiwi Islands	0.745404	0	234.84
45133	CP0003	CP0287	0.0679717	-0.0648992	DEMED East Alligator River	WHNT Tiwi Islands	DEMED East Alligator River_WHNT Tiwi Islands	0.753217	0	234.84
47730	CP0004	CP0260	0.0658943	-0.0647846	DEMED East Alligator River	WHNT Tiwi Islands	DEMED East Alligator River_WHNT Tiwi Islands	0.752625	0	234.84
47799	CP0004	CP0282	0.0648501	-0.0639307	DEMED East Alligator River	WHNT Tiwi Islands	DEMED East Alligator River_WHNT Tiwi Islands	0.751589	0	234.84
36695	CP0219	CP0056	0.0686363	-0.0637349	DEMED East Alligator River	WHNT Tiwi Islands	DEMED East Alligator River_WHNT Tiwi Islands	0.749955	0	234.84
50195	CP0230	CP0264	0.0612833	-0.0633311	DEMED East Alligator River	WHNT Tiwi Islands	DEMED East Alligator River_WHNT Tiwi Islands	0.755858	0	234.84
50147	CP0230	CP0073	0.0702956	-0.0630915	DEMED East Alligator River	WHNT Tiwi Islands	DEMED East Alligator River_WHNT Tiwi Islands	0.748558	0	234.84
36834	CP0219	CP0254	0.0668951	-0.0630172	DEMED East Alligator River	WHNT Tiwi Islands	DEMED East Alligator River_WHNT Tiwi Islands	0.747926	0	234.84
36732	CP0219	CP0188	0.0670038	-0.06238	DEMED East Alligator River	WHNT Tiwi Islands	DEMED East Alligator River_WHNT Tiwi Islands	0.749503	0	234.84
36731	CP0219	CP0068	0.0696123	-0.0606688	DEMED East Alligator River	WHNT Tiwi Islands	DEMED East Alligator River_WHNT Tiwi Islands	0.752119	0	234.84
45071	CP0003	CP0039	0.0602061	-0.0601915	DEMED East Alligator River	WHNT Tiwi Islands	DEMED East Alligator River_WHNT Tiwi Islands	0.764057	0	234.84
36763	CP0219	CP0189	0.0672678	-0.0598277	DEMED East Alligator River	WHNT Tiwi Islands	DEMED East Alligator River_WHNT Tiwi Islands	0.750857	0	234.84
47788	CP0004	CP0279	0.0613575	-0.0596091	DEMED East Alligator River	WHNT Tiwi Islands	DEMED East Alligator River_WHNT Tiwi Islands	0.750407	0	234.84
52049	CP0217	CP0068	0.0622737	-0.0595157	DEMED East Alligator River	WHNT Tiwi Islands	DEMED East Alligator River_WHNT Tiwi Islands	0.765297	0	234.84
47621	CP0004	CP0022	0.065942	-0.0587467	DEMED East Alligator River	WHNT Tiwi Islands	DEMED East Alligator River_WHNT Tiwi Islands	0.755797	0	234.84
50161	CP0230	CP0287	0.0658347	-0.0587084	DEMED East Alligator River	WHNT Tiwi Islands	DEMED East Alligator River_WHNT Tiwi Islands	0.756014	0	234.84
45187	CP0003	CP0249	0.0650082	-0.0583882	DEMED East Alligator River	WHNT Tiwi Islands	DEMED East Alligator River_WHNT Tiwi Islands	0.756764	0	234.84
52025	CP0217	CP0064	0.0575149	-0.0582425	DEMED East Alligator River	WHNT Tiwi Islands	DEMED East Alligator River_WHNT Tiwi Islands	0.761078	0	234.84
47714	CP0004	CP0189	0.0669562	-0.057893	DEMED East Alligator River	WHNT Tiwi Islands	DEMED East Alligator River_WHNT Tiwi Islands	0.757419	0	234.84
45036	CP0003	CP0052	0.0685105	-0.0576923	DEMED East Alligator River	WHNT Tiwi Islands	DEMED East Alligator River_WHNT Tiwi Islands	0.746114	0	234.84
45049	CP0003	CP0167	0.0658964	-0.0576562	DEMED East Alligator River	WHNT Tiwi Islands	DEMED East Alligator River_WHNT Tiwi Islands	0.743726	0	234.84
50089	CP0230	CP0169	0.0659917	-0.057398	DEMED East Alligator River	WHNT Tiwi Islands	DEMED East Alligator River_WHNT Tiwi Islands	0.749955	0	234.84
36682	CP0219	CP0024	0.0674968	-0.0569054	DEMED East Alligator River	WHNT Tiwi Islands	DEMED East Alligator River_WHNT Tiwi Islands	0.753113	0	234.84
52038	CP0217	CP0185	0.0555355	-0.0565781	DEMED East Alligator River	WHNT Tiwi Islands	DEMED East Alligator River_WHNT Tiwi Islands	0.76013	0	234.84
47670	CP0004	CP0067	0.0632132	-0.0565203	DEMED East Alligator River	WHNT Tiwi Islands	DEMED East Alligator River_WHNT Tiwi Islands	0.75557	0	234.84
52105	CP0217	CP0194	0.0585145	-0.0563525	DEMED East Alligator River	WHNT Tiwi Islands	DEMED East Alligator River_WHNT Tiwi Islands	0.763406	0	234.84
36718	CP0219	CP0041	0.0648415	-0.0562977	DEMED East Alligator River	WHNT Tiwi Islands	DEMED East Alligator River_WHNT Tiwi Islands	0.74982	0	234.84
50172	CP0230	CP0260	0.0660531	-0.0557295	DEMED East Alligator River	WHNT Tiwi Islands	DEMED East Alligator River_WHNT Tiwi Islands	0.745714	0	234.84
52120	CP0217	CP0264	0.0611654	-0.0554229	DEMED East Alligator River	WHNT Tiwi Islands	DEMED East Alligator River_WHNT Tiwi Islands	0.766468	0	234.84
50207	CP0230	CP0265	0.0663063	-0.0549656	DEMED East Alligator River	WHNT Tiwi Islands	DEMED East Alligator River_WHNT Tiwi Islands	0.746126	0	234.84
45152	CP0003	CP0194	0.0674747	-0.054334	DEMED East Alligator River	WHNT Tiwi Islands	DEMED East Alligator River_WHNT Tiwi Islands	0.752804	0	234.84
36767	CP0219	CP0258	0.0671601	-0.0541746	DEMED East Alligator River	WHNT Tiwi Islands	DEMED East Alligator River_WHNT Tiwi Islands	0.753205	0	234.84
36730	CP0219	CP0048	0.065186	-0.0537652	DEMED East Alligator River	WHNT Tiwi Islands	DEMED East Alligator River_WHNT Tiwi Islands	0.751806	0	234.84
47645	CP0004	CP0038	0.0621837	-0.053618	DEMED East Alligator River	WHNT Tiwi Islands	DEMED East Alligator River_WHNT Tiwi Islands	0.755152	0	234.84
45119	CP0003	CP0073	0.0648483	-0.0536053	DEMED East Alligator River	WHNT Tiwi Islands	DEMED East Alligator River_WHNT Tiwi Islands	0.748645	0	234.84
36671	CP0219	CP0052	0.0643939	-0.0533779	DEMED East Alligator River	WHNT Tiwi Islands	DEMED East Alligator River_WHNT Tiwi Islands	0.751172	0	234.84
47962	CP0229	CP0264	0.0616079	-0.0531697	DEMED East Alligator River	WHNT Tiwi Islands	DEMED East Alligator River_WHNT Tiwi Islands	0.768383	0	234.84
47704	CP0004	CP0050	0.0639493	-0.0530254	DEMED East Alligator River	WHNT Tiwi Islands	DEMED East Alligator River_WHNT Tiwi Islands	0.755978	0	234.84
36706	CP0219	CP0039	0.0624098	-0.0526944	DEMED East Alligator River	WHNT Tiwi Islands	DEMED East Alligator River_WHNT Tiwi Islands	0.770112	0	234.84
50112	CP0230	CP0067	0.064656	-0.0520313	DEMED East Alligator River	WHNT Tiwi Islands	DEMED East Alligator River_WHNT Tiwi Islands	0.74562	0	234.84
50077	CP0230	CP0167	0.0664865	-0.0509981	DEMED East Alligator River	WHNT Tiwi Islands	DEMED East Alligator River_WHNT Tiwi Islands	0.748198	0	234.84
47647	CP0004	CP0169	0.0643816	-0.0509138	DEMED East Alligator River	WHNT Tiwi Islands	DEMED East Alligator River_WHNT Tiwi Islands	0.758252	0	234.84
45035	CP0003	CP0022	0.0662324	-0.0508475	DEMED East Alligator River	WHNT Tiwi Islands	DEMED East Alligator River_WHNT Tiwi Islands	0.748643	0	234.84
47633	CP0004	CP0024	0.0660992	-0.0501956	DEMED East Alligator River	WHNT Tiwi Islands	DEMED East Alligator River_WHNT Tiwi Islands	0.760413	0	234.84
52050	CP0217	CP0188	0.057117	-0.0501026	DEMED East Alligator River	WHNT Tiwi Islands	DEMED East Alligator River_WHNT Tiwi Islands	0.765458	0	234.84
36837	CP0219	CP0279	0.0660411	-0.0495855	DEMED East Alligator River	WHNT Tiwi Islands	DEMED East Alligator River_WHNT Tiwi Islands	0.755052	0	234.84
36768	CP0219	CP0287	0.0669078	-0.0492523	DEMED East Alligator River	WHNT Tiwi Islands	DEMED East Alligator River_WHNT Tiwi Islands	0.761392	0	234.84
36779	CP0219	CP0260	0.0665825	-0.0492352	DEMED East Alligator River	WHNT Tiwi Islands	DEMED East Alligator River_WHNT Tiwi Islands	0.755594	0	234.84
45073	CP0003	CP0178	0.0657871	-0.0481551	DEMED East Alligator River	WHNT Tiwi Islands	DEMED East Alligator River_WHNT Tiwi Islands	0.748961	0	234.84
36754	CP0219	CP0073	0.0650568	-0.0479299	DEMED East Alligator River	WHNT Tiwi Islands	DEMED East Alligator River_WHNT Tiwi Islands	0.755001	0	234.84
50088	CP0230	CP0056	0.0672072	-0.0475968	DEMED East Alligator River	WHNT Tiwi Islands	DEMED East Alligator River_WHNT Tiwi Islands	0.751081	0	234.84
45060	CP0003	CP0056	0.0669917	-0.0473734	DEMED East Alligator River	WHNT Tiwi Islands	DEMED East Alligator River_WHNT Tiwi Islands	0.750903	0	234.84
47671	CP0004	CP0185	0.0600145	-0.0467427	DEMED East Alligator River	WHNT Tiwi Islands	DEMED East Alligator River_WHNT Tiwi Islands	0.756598	0	234.84
45061	CP0003	CP0169	0.0637797	-0.0466454	DEMED East Alligator River	WHNT Tiwi Islands	DEMED East Alligator River_WHNT Tiwi Islands	0.75376	0	234.84
45144	CP0003	CP0260	0.065473	-0.0461104	DEMED East Alligator River	WHNT Tiwi Islands	DEMED East Alligator River_WHNT Tiwi Islands	0.750588	0	234.84
50099	CP0230	CP0039	0.0570088	-0.0461066	DEMED East Alligator River	WHNT Tiwi Islands	DEMED East Alligator River_WHNT Tiwi Islands	0.768537	0	234.84
45202	CP0003	CP0279	0.0620478	-0.0453692	DEMED East Alligator River	WHNT Tiwi Islands	DEMED East Alligator River_WHNT Tiwi Islands	0.746744	0	234.84
50087	CP0230	CP0038	0.0641557	-0.0449719	DEMED East Alligator River	WHNT Tiwi Islands	DEMED East Alligator River_WHNT Tiwi Islands	0.749685	0	234.84
45179	CP0003	CP0265	0.0660888	-0.0448438	DEMED East Alligator River	WHNT Tiwi Islands	DEMED East Alligator River_WHNT Tiwi Islands	0.751264	0	234.84
45156	CP0003	CP0261	0.0639913	-0.0443296	DEMED East Alligator River	WHNT Tiwi Islands	DEMED East Alligator River_WHNT Tiwi Islands	0.74991	0	234.84
50101	CP0230	CP0178	0.0620379	-0.0438514	DEMED East Alligator River	WHNT Tiwi Islands	DEMED East Alligator River_WHNT Tiwi Islands	0.747791	0	234.84
36802	CP0219	CP0264	0.0582192	-0.0438247	DEMED East Alligator River	WHNT Tiwi Islands	DEMED East Alligator River_WHNT Tiwi Islands	0.762978	0	234.84
36753	CP0219	CP0050	0.063922	-0.0437619	DEMED East Alligator River	WHNT Tiwi Islands	DEMED East Alligator River_WHNT Tiwi Islands	0.755417	0	234.84
45097	CP0003	CP0188	0.0646154	-0.0436102	DEMED East Alligator River	WHNT Tiwi Islands	DEMED East Alligator River_WHNT Tiwi Islands	0.756652	0	234.84
45191	CP0003	CP0266	0.0696454	-0.0430495	DEMED East Alligator River	WHNT Tiwi Islands	DEMED East Alligator River_WHNT Tiwi Islands	0.755879	0	234.84
45084	CP0003	CP0067	0.0618781	-0.0430006	DEMED East Alligator River	WHNT Tiwi Islands	DEMED East Alligator River_WHNT Tiwi Islands	0.748869	0	234.84
45059	CP0003	CP0038	0.0621387	-0.0427096	DEMED East Alligator River	WHNT Tiwi Islands	DEMED East Alligator River_WHNT Tiwi Islands	0.748826	0	234.84
47658	CP0004	CP0064	0.0605458	-0.0400651	DEMED East Alligator River	WHNT Tiwi Islands	DEMED East Alligator River_WHNT Tiwi Islands	0.760889	0	234.84
50124	CP0230	CP0068	0.0649351	-0.0397123	DEMED East Alligator River	WHNT Tiwi Islands	DEMED East Alligator River_WHNT Tiwi Islands	0.753608	0	234.84
47657	CP0004	CP0039	0.0571739	-0.0395634	DEMED East Alligator River	WHNT Tiwi Islands	DEMED East Alligator River_WHNT Tiwi Islands	0.770943	0	234.84
50064	CP0230	CP0052	0.0635035	-0.0393258	DEMED East Alligator River	WHNT Tiwi Islands	DEMED East Alligator River_WHNT Tiwi Islands	0.751759	0	234.84
45083	CP0003	CP0041	0.0684239	-0.0392433	DEMED East Alligator River	WHNT Tiwi Islands	DEMED East Alligator River_WHNT Tiwi Islands	0.757086	0	234.84
45047	CP0003	CP0024	0.0642301	-0.038681	DEMED East Alligator River	WHNT Tiwi Islands	DEMED East Alligator River_WHNT Tiwi Islands	0.75683	0	234.84
36696	CP0219	CP0169	0.0625452	-0.0383142	DEMED East Alligator River	WHNT Tiwi Islands	DEMED East Alligator River_WHNT Tiwi Islands	0.757773	0	234.84
50136	CP0230	CP0069	0.064743	-0.0382206	DEMED East Alligator River	WHNT Tiwi Islands	DEMED East Alligator River_WHNT Tiwi Islands	0.754914	0	234.84
36848	CP0219	CP0282	0.0611986	-0.0376361	DEMED East Alligator River	WHNT Tiwi Islands	DEMED East Alligator River_WHNT Tiwi Islands	0.757288	0	234.84
50227	CP0230	CP0254	0.0618575	-0.0365397	DEMED East Alligator River	WHNT Tiwi Islands	DEMED East Alligator River_WHNT Tiwi Islands	0.752029	0	234.84
45163	CP0003	CP0195	0.0641769	-0.036478	DEMED East Alligator River	WHNT Tiwi Islands	DEMED East Alligator River_WHNT Tiwi Islands	0.754895	0	234.84
45128	CP0003	CP0189	0.0654493	-0.0363636	DEMED East Alligator River	WHNT Tiwi Islands	DEMED East Alligator River_WHNT Tiwi Islands	0.756102	0	234.84
50063	CP0230	CP0022	0.0631997	-0.0362524	DEMED East Alligator River	WHNT Tiwi Islands	DEMED East Alligator River_WHNT Tiwi Islands	0.754695	0	234.84
50191	CP0230	CP0195	0.0643878	-0.0361389	DEMED East Alligator River	WHNT Tiwi Islands	DEMED East Alligator River_WHNT Tiwi Islands	0.754476	0	234.84
50135	CP0230	CP0049	0.0625676	-0.0354909	DEMED East Alligator River	WHNT Tiwi Islands	DEMED East Alligator River_WHNT Tiwi Islands	0.753787	0	234.84
36720	CP0219	CP0185	0.06	-0.0346692	DEMED East Alligator River	WHNT Tiwi Islands	DEMED East Alligator River_WHNT Tiwi Islands	0.757117	0	234.84
50219	CP0230	CP0266	0.0638989	-0.0331665	DEMED East Alligator River	WHNT Tiwi Islands	DEMED East Alligator River_WHNT Tiwi Islands	0.756318	0	234.84
50230	CP0230	CP0279	0.0606498	-0.0329276	DEMED East Alligator River	WHNT Tiwi Islands	DEMED East Alligator River_WHNT Tiwi Islands	0.752437	0	234.84
45095	CP0003	CP0048	0.0628054	-0.0326971	DEMED East Alligator River	WHNT Tiwi Islands	DEMED East Alligator River_WHNT Tiwi Islands	0.754661	0	234.84
50156	CP0230	CP0189	0.0618687	-0.0325407	DEMED East Alligator River	WHNT Tiwi Islands	DEMED East Alligator River_WHNT Tiwi Islands	0.75487	0	234.84
45132	CP0003	CP0258	0.0640608	-0.0320914	DEMED East Alligator River	WHNT Tiwi Islands	DEMED East Alligator River_WHNT Tiwi Islands	0.756515	0	234.84
45108	CP0003	CP0069	0.0621724	-0.0311125	DEMED East Alligator River	WHNT Tiwi Islands	DEMED East Alligator River_WHNT Tiwi Islands	0.756732	0	234.84
45118	CP0003	CP0050	0.0627941	-0.0310345	DEMED East Alligator River	WHNT Tiwi Islands	DEMED East Alligator River_WHNT Tiwi Islands	0.756243	0	234.84
45085	CP0003	CP0185	0.0606827	-0.0306825	DEMED East Alligator River	WHNT Tiwi Islands	DEMED East Alligator River_WHNT Tiwi Islands	0.75456	0	234.84
50125	CP0230	CP0188	0.0612355	-0.0304528	DEMED East Alligator River	WHNT Tiwi Islands	DEMED East Alligator River_WHNT Tiwi Islands	0.760748	0	234.84
36707	CP0219	CP0064	0.0603495	-0.0281847	DEMED East Alligator River	WHNT Tiwi Islands	DEMED East Alligator River_WHNT Tiwi Islands	0.761574	0	234.84
50123	CP0230	CP0048	0.0586854	-0.0279862	DEMED East Alligator River	WHNT Tiwi Islands	DEMED East Alligator River_WHNT Tiwi Islands	0.753792	0	234.84
47682	CP0004	CP0068	0.0597069	-0.0273438	DEMED East Alligator River	WHNT Tiwi Islands	DEMED East Alligator River_WHNT Tiwi Islands	0.7666	0	234.84
36787	CP0219	CP0194	0.0591844	-0.0266263	DEMED East Alligator River	WHNT Tiwi Islands	DEMED East Alligator River_WHNT Tiwi Islands	0.761187	0	234.84
45107	CP0003	CP0049	0.0603542	-0.02625	DEMED East Alligator River	WHNT Tiwi Islands	DEMED East Alligator River_WHNT Tiwi Islands	0.756053	0	234.84
50100	CP0230	CP0064	0.0621622	-0.0260937	DEMED East Alligator River	WHNT Tiwi Islands	DEMED East Alligator River_WHNT Tiwi Islands	0.758829	0	234.84
50075	CP0230	CP0024	0.0602997	-0.025933	DEMED East Alligator River	WHNT Tiwi Islands	DEMED East Alligator River_WHNT Tiwi Islands	0.760065	0	234.84
45072	CP0003	CP0064	0.0568797	-0.025172	DEMED East Alligator River	WHNT Tiwi Islands	DEMED East Alligator River_WHNT Tiwi Islands	0.753611	0	234.84
50111	CP0230	CP0041	0.0583679	-0.0171768	DEMED East Alligator River	WHNT Tiwi Islands	DEMED East Alligator River_WHNT Tiwi Islands	0.760043	0	234.84
50160	CP0230	CP0258	0.0577826	-0.0164371	DEMED East Alligator River	WHNT Tiwi Islands	DEMED East Alligator River_WHNT Tiwi Islands	0.759931	0	234.84
50113	CP0230	CP0185	0.057668	-0.0159375	DEMED East Alligator River	WHNT Tiwi Islands	DEMED East Alligator River_WHNT Tiwi Islands	0.760137	0	234.84
45096	CP0003	CP0068	0.0585683	-0.0117555	DEMED East Alligator River	WHNT Tiwi Islands	DEMED East Alligator River_WHNT Tiwi Islands	0.763467	0	234.84
45213	CP0003	CP0282	0.0600726	-0.00988701	DEMED East Alligator River	WHNT Tiwi Islands	DEMED East Alligator River_WHNT Tiwi Islands	0.765245	0	234.84
50180	CP0230	CP0194	0.0548736	-0.00764818	DEMED East Alligator River	WHNT Tiwi Islands	DEMED East Alligator River_WHNT Tiwi Islands	0.767329	0	234.84
50241	CP0230	CP0282	0.0537849	0.00782718	DEMED East Alligator River	WHNT Tiwi Islands	DEMED East Alligator River_WHNT Tiwi Islands	0.769105	0	234.84
47873	CP0229	CP0074	0.0761733	-0.145018	DEMED East Alligator River	WHNT Wagait Finniss River	DEMED East Alligator River_WHNT Wagait Finniss River	0.749007	0	282.896
50106	CP0230	CP0074	0.0714929	-0.133878	DEMED East Alligator River	WHNT Wagait Finniss River	DEMED East Alligator River_WHNT Wagait Finniss River	0.750045	0	282.896
47664	CP0004	CP0074	0.0690029	-0.118224	DEMED East Alligator River	WHNT Wagait Finniss River	DEMED East Alligator River_WHNT Wagait Finniss River	0.755871	0	282.896
45078	CP0003	CP0074	0.0644288	-0.0974787	DEMED East Alligator River	WHNT Wagait Finniss River	DEMED East Alligator River_WHNT Wagait Finniss River	0.760783	0	282.896
47872	CP0229	CP0032	0.0644056	-0.0959837	DEMED East Alligator River	WHNT Wagait Finniss River	DEMED East Alligator River_WHNT Wagait Finniss River	0.748512	0	282.896
33563	CP0218	CP0074	0.0674725	-0.0953058	DEMED East Alligator River	WHNT Wagait Finniss River	DEMED East Alligator River_WHNT Wagait Finniss River	0.76547	0	282.896
47885	CP0229	CP0164	0.0692891	-0.0879252	DEMED East Alligator River	WHNT Wagait Finniss River	DEMED East Alligator River_WHNT Wagait Finniss River	0.757398	0	282.896
33562	CP0218	CP0032	0.0631085	-0.0732848	DEMED East Alligator River	WHNT Wagait Finniss River	DEMED East Alligator River_WHNT Wagait Finniss River	0.764785	0	282.896
52043	CP0217	CP0164	0.0628726	-0.0672226	DEMED East Alligator River	WHNT Wagait Finniss River	DEMED East Alligator River_WHNT Wagait Finniss River	0.761789	0	282.896
33575	CP0218	CP0164	0.0595131	-0.0616343	DEMED East Alligator River	WHNT Wagait Finniss River	DEMED East Alligator River_WHNT Wagait Finniss River	0.766997	0	282.896
47663	CP0004	CP0032	0.0648131	-0.0561158	DEMED East Alligator River	WHNT Wagait Finniss River	DEMED East Alligator River_WHNT Wagait Finniss River	0.756183	0	282.896
52031	CP0217	CP0074	0.0601952	-0.0558719	DEMED East Alligator River	WHNT Wagait Finniss River	DEMED East Alligator River_WHNT Wagait Finniss River	0.777838	0	282.896
47676	CP0004	CP0164	0.0617551	-0.0483084	DEMED East Alligator River	WHNT Wagait Finniss River	DEMED East Alligator River_WHNT Wagait Finniss River	0.757403	0	282.896
50105	CP0230	CP0032	0.0640749	-0.039924	DEMED East Alligator River	WHNT Wagait Finniss River	DEMED East Alligator River_WHNT Wagait Finniss River	0.757379	0	282.896
50118	CP0230	CP0164	0.0644464	-0.0394573	DEMED East Alligator River	WHNT Wagait Finniss River	DEMED East Alligator River_WHNT Wagait Finniss River	0.753105	0	282.896
45077	CP0003	CP0032	0.0593434	-0.0320839	DEMED East Alligator River	WHNT Wagait Finniss River	DEMED East Alligator River_WHNT Wagait Finniss River	0.757215	0	282.896
36712	CP0219	CP0032	0.0599244	-0.0206743	DEMED East Alligator River	WHNT Wagait Finniss River	DEMED East Alligator River_WHNT Wagait Finniss River	0.765341	0	282.896
36713	CP0219	CP0074	0.049676	-0.0140469	DEMED East Alligator River	WHNT Wagait Finniss River	DEMED East Alligator River_WHNT Wagait Finniss River	0.789507	0	282.896
36725	CP0219	CP0164	0.0527358	-0.00747455	DEMED East Alligator River	WHNT Wagait Finniss River	DEMED East Alligator River_WHNT Wagait Finniss River	0.765569	0	282.896
45090	CP0003	CP0164	0.0532203	0.00375	DEMED East Alligator River	WHNT Wagait Finniss River	DEMED East Alligator River_WHNT Wagait Finniss River	0.766733	0	282.896
52030	CP0217	CP0032	0.0467931	0.0129516	DEMED East Alligator River	WHNT Wagait Finniss River	DEMED East Alligator River_WHNT Wagait Finniss River	0.788618	0	282.896
33538	CP0218	CP0029	0.0924991	-0.196429	DEMED East Alligator River	WHNT Welltree Station	DEMED East Alligator River_WHNT Welltree Station	0.730346	0	285.035
47848	CP0229	CP0029	0.0827922	-0.164738	DEMED East Alligator River	WHNT Welltree Station	DEMED East Alligator River_WHNT Welltree Station	0.730519	0	285.035
52006	CP0217	CP0029	0.0820235	-0.156612	DEMED East Alligator River	WHNT Welltree Station	DEMED East Alligator River_WHNT Welltree Station	0.733966	0	285.035
47639	CP0004	CP0029	0.0882831	-0.149217	DEMED East Alligator River	WHNT Welltree Station	DEMED East Alligator River_WHNT Welltree Station	0.728922	0	285.035
45053	CP0003	CP0029	0.0849567	-0.136897	DEMED East Alligator River	WHNT Welltree Station	DEMED East Alligator River_WHNT Welltree Station	0.732504	0	285.035
36688	CP0219	CP0029	0.0800792	-0.123379	DEMED East Alligator River	WHNT Welltree Station	DEMED East Alligator River_WHNT Welltree Station	0.734119	0	285.035
50081	CP0230	CP0029	0.0779338	-0.114698	DEMED East Alligator River	WHNT Welltree Station	DEMED East Alligator River_WHNT Welltree Station	0.736951	0	285.035
36647	CP0219	CP0202	0.0891892	-0.413023	DEMED East Alligator River	WMI Djukbinj National Park	DEMED East Alligator River_WMI Djukbinj National Park	0.743063	0	168.681
33497	CP0218	CP0202	0.0922549	-0.407204	DEMED East Alligator River	WMI Djukbinj National Park	DEMED East Alligator River_WMI Djukbinj National Park	0.748962	0	168.681
47598	CP0004	CP0202	0.0898247	-0.406011	DEMED East Alligator River	WMI Djukbinj National Park	DEMED East Alligator River_WMI Djukbinj National Park	0.746611	0	168.681
47807	CP0229	CP0202	0.0881344	-0.390774	DEMED East Alligator River	WMI Djukbinj National Park	DEMED East Alligator River_WMI Djukbinj National Park	0.75158	0	168.681
45012	CP0003	CP0202	0.0825208	-0.378095	DEMED East Alligator River	WMI Djukbinj National Park	DEMED East Alligator River_WMI Djukbinj National Park	0.749549	0	168.681
33485	CP0218	CP0201	0.0875926	-0.321802	DEMED East Alligator River	WMI Djukbinj National Park	DEMED East Alligator River_WMI Djukbinj National Park	0.746523	0	168.681
36635	CP0219	CP0201	0.0854362	-0.309028	DEMED East Alligator River	WMI Djukbinj National Park	DEMED East Alligator River_WMI Djukbinj National Park	0.749459	0	168.681
45000	CP0003	CP0201	0.0805636	-0.279757	DEMED East Alligator River	WMI Djukbinj National Park	DEMED East Alligator River_WMI Djukbinj National Park	0.756322	0	168.681
36623	CP0219	CP0200	0.0765766	-0.22494	DEMED East Alligator River	WMI Djukbinj National Park	DEMED East Alligator River_WMI Djukbinj National Park	0.748198	0	168.681
33473	CP0218	CP0200	0.078534	-0.209228	DEMED East Alligator River	WMI Djukbinj National Park	DEMED East Alligator River_WMI Djukbinj National Park	0.756635	0	168.681
36611	CP0219	CP0199	0.0729335	-0.170395	DEMED East Alligator River	WMI Djukbinj National Park	DEMED East Alligator River_WMI Djukbinj National Park	0.749145	0	168.681
33461	CP0218	CP0199	0.0694695	-0.137061	DEMED East Alligator River	WMI Djukbinj National Park	DEMED East Alligator River_WMI Djukbinj National Park	0.762089	0	168.681
47810	CP0229	CP0397	0.0643939	-0.0884354	DEMED East Alligator River	WMI Djukbinj National Park	DEMED East Alligator River_WMI Djukbinj National Park	0.752345	0	168.681
33500	CP0218	CP0397	0.0621958	-0.087552	DEMED East Alligator River	WMI Djukbinj National Park	DEMED East Alligator River_WMI Djukbinj National Park	0.756715	0	168.681
33477	CP0218	CP0208	0.0647313	-0.0861053	DEMED East Alligator River	WMI Djukbinj National Park	DEMED East Alligator River_WMI Djukbinj National Park	0.759737	0	168.681
33465	CP0218	CP0207	0.0605951	-0.0788835	DEMED East Alligator River	WMI Djukbinj National Park	DEMED East Alligator River_WMI Djukbinj National Park	0.759513	0	168.681
33508	CP0218	CP0203	0.0613386	-0.0761624	DEMED East Alligator River	WMI Djukbinj National Park	DEMED East Alligator River_WMI Djukbinj National Park	0.761772	0	168.681
47818	CP0229	CP0203	0.0619022	-0.0753914	DEMED East Alligator River	WMI Djukbinj National Park	DEMED East Alligator River_WMI Djukbinj National Park	0.756813	0	168.681
36650	CP0219	CP0397	0.0638719	-0.0483461	DEMED East Alligator River	WMI Djukbinj National Park	DEMED East Alligator River_WMI Djukbinj National Park	0.753688	0	168.681
47609	CP0004	CP0203	0.0572616	-0.0483084	DEMED East Alligator River	WMI Djukbinj National Park	DEMED East Alligator River_WMI Djukbinj National Park	0.7528	0	168.681
47601	CP0004	CP0397	0.0597473	-0.0444047	DEMED East Alligator River	WMI Djukbinj National Park	DEMED East Alligator River_WMI Djukbinj National Park	0.757671	0	168.681
45015	CP0003	CP0397	0.0559062	-0.022045	DEMED East Alligator River	WMI Djukbinj National Park	DEMED East Alligator River_WMI Djukbinj National Park	0.754824	0	168.681
36658	CP0219	CP0203	0.0568959	-0.0214968	DEMED East Alligator River	WMI Djukbinj National Park	DEMED East Alligator River_WMI Djukbinj National Park	0.762063	0	168.681
36615	CP0219	CP0207	0.0568857	-0.0139949	DEMED East Alligator River	WMI Djukbinj National Park	DEMED East Alligator River_WMI Djukbinj National Park	0.765977	0	168.681
36627	CP0219	CP0208	0.0566853	-0.0131914	DEMED East Alligator River	WMI Djukbinj National Park	DEMED East Alligator River_WMI Djukbinj National Park	0.766151	0	168.681
50051	CP0230	CP0203	0.0574464	-0.00842697	DEMED East Alligator River	WMI Djukbinj National Park	DEMED East Alligator River_WMI Djukbinj National Park	0.764091	0	168.681
45023	CP0003	CP0203	0.0523371	-0.00125235	DEMED East Alligator River	WMI Djukbinj National Park	DEMED East Alligator River_WMI Djukbinj National Park	0.7634	0	168.681
33441	CP0218	CP0205	0.064708	-0.0858726	DEMED East Alligator River	WMI Harrison Dam	DEMED East Alligator River_WMI Harrison Dam	0.759733	0	176.49
33442	CP0218	CP0400	0.0562669	-0.0595568	DEMED East Alligator River	WMI Harrison Dam	DEMED East Alligator River_WMI Harrison Dam	0.764833	0	176.49
33454	CP0218	CP0401	0.0591737	-0.0750693	DEMED East Alligator River	WMI Koolpinyah Station	DEMED East Alligator River_WMI Koolpinyah Station	0.759968	0	184.223
36604	CP0219	CP0401	0.0558156	-0.0146404	DEMED East Alligator River	WMI Koolpinyah Station	DEMED East Alligator River_WMI Koolpinyah Station	0.764674	0	184.223
30422	CP0001	CP0218	0.0793651	-0.15354	Janamba Donalds Lagoon Station	DEMED East Alligator River	Janamba Donalds Lagoon Station_DEMED East Alligator River	0.753066	0	193.589
33716	CP0007	CP0219	0.0775878	-0.143336	Janamba Donalds Lagoon Station	DEMED East Alligator River	Janamba Donalds Lagoon Station_DEMED East Alligator River	0.749145	0	193.589
30434	CP0001	CP0219	0.0727273	-0.142677	Janamba Donalds Lagoon Station	DEMED East Alligator River	Janamba Donalds Lagoon Station_DEMED East Alligator River	0.752025	0	193.589
30503	CP0001	CP0217	0.0759082	-0.133974	Janamba Donalds Lagoon Station	DEMED East Alligator River	Janamba Donalds Lagoon Station_DEMED East Alligator River	0.759895	0	193.589
30482	CP0001	CP0229	0.0728979	-0.131168	Janamba Donalds Lagoon Station	DEMED East Alligator River	Janamba Donalds Lagoon Station_DEMED East Alligator River	0.759022	0	193.589
33785	CP0007	CP0217	0.0748238	-0.114215	Janamba Donalds Lagoon Station	DEMED East Alligator River	Janamba Donalds Lagoon Station_DEMED East Alligator River	0.760889	0	193.589
30493	CP0001	CP0230	0.067879	-0.113883	Janamba Donalds Lagoon Station	DEMED East Alligator River	Janamba Donalds Lagoon Station_DEMED East Alligator River	0.762153	0	193.589
33764	CP0007	CP0229	0.0705521	-0.0996813	Janamba Donalds Lagoon Station	DEMED East Alligator River	Janamba Donalds Lagoon Station_DEMED East Alligator River	0.764977	0	193.589
33775	CP0007	CP0230	0.0651782	-0.0935734	Janamba Donalds Lagoon Station	DEMED East Alligator River	Janamba Donalds Lagoon Station_DEMED East Alligator River	0.762514	0	193.589
30469	CP0001	CP0003	0.0598954	-0.0780232	Janamba Donalds Lagoon Station	DEMED East Alligator River	Janamba Donalds Lagoon Station_DEMED East Alligator River	0.771874	0	193.589
33751	CP0007	CP0003	0.0562974	-0.0521862	Janamba Donalds Lagoon Station	DEMED East Alligator River	Janamba Donalds Lagoon Station_DEMED East Alligator River	0.773728	0	193.589
30481	CP0001	CP0004	0.05381	-0.0426343	Janamba Donalds Lagoon Station	DEMED East Alligator River	Janamba Donalds Lagoon Station_DEMED East Alligator River	0.783767	0	193.589
33763	CP0007	CP0004	0.0536392	-0.0376591	Janamba Donalds Lagoon Station	DEMED East Alligator River	Janamba Donalds Lagoon Station_DEMED East Alligator River	0.779032	0	193.589
30515	CP0001	CP0239	0.0895954	-0.193478	Janamba Donalds Lagoon Station	Janamba Muk Muk Mugalimba	Janamba Donalds Lagoon Station_Janamba Muk Muk Mugalimba	0.743858	0	102.757
33820	CP0007	CP0220	0.0801369	-0.173119	Janamba Donalds Lagoon Station	Janamba Muk Muk Mugalimba	Janamba Donalds Lagoon Station_Janamba Muk Muk Mugalimba	0.748244	0	102.757
30574	CP0001	CP0236	0.080689	-0.16527	Janamba Donalds Lagoon Station	Janamba Muk Muk Mugalimba	Janamba Donalds Lagoon Station_Janamba Muk Muk Mugalimba	0.749683	0	102.757
33797	CP0007	CP0239	0.0841611	-0.161912	Janamba Donalds Lagoon Station	Janamba Muk Muk Mugalimba	Janamba Donalds Lagoon Station_Janamba Muk Muk Mugalimba	0.748962	0	102.757
30538	CP0001	CP0220	0.0774496	-0.158327	Janamba Donalds Lagoon Station	Janamba Muk Muk Mugalimba	Janamba Donalds Lagoon Station_Janamba Muk Muk Mugalimba	0.752792	0	102.757
30562	CP0001	CP0233	0.075234	-0.157581	Janamba Donalds Lagoon Station	Janamba Muk Muk Mugalimba	Janamba Donalds Lagoon Station_Janamba Muk Muk Mugalimba	0.74739	0	102.757
30550	CP0001	CP0225	0.0775473	-0.154486	Janamba Donalds Lagoon Station	Janamba Muk Muk Mugalimba	Janamba Donalds Lagoon Station_Janamba Muk Muk Mugalimba	0.751307	0	102.757
33844	CP0007	CP0233	0.075414	-0.151553	Janamba Donalds Lagoon Station	Janamba Muk Muk Mugalimba	Janamba Donalds Lagoon Station_Janamba Muk Muk Mugalimba	0.743071	0	102.757
30596	CP0001	CP0238	0.0676381	-0.139812	Janamba Donalds Lagoon Station	Janamba Muk Muk Mugalimba	Janamba Donalds Lagoon Station_Janamba Muk Muk Mugalimba	0.749056	0	102.757
33856	CP0007	CP0236	0.076686	-0.138275	Janamba Donalds Lagoon Station	Janamba Muk Muk Mugalimba	Janamba Donalds Lagoon Station_Janamba Muk Muk Mugalimba	0.751994	0	102.757
30585	CP0001	CP0237	0.0698314	-0.134757	Janamba Donalds Lagoon Station	Janamba Muk Muk Mugalimba	Janamba Donalds Lagoon Station_Janamba Muk Muk Mugalimba	0.753849	0	102.757
33878	CP0007	CP0238	0.0726749	-0.128884	Janamba Donalds Lagoon Station	Janamba Muk Muk Mugalimba	Janamba Donalds Lagoon Station_Janamba Muk Muk Mugalimba	0.752294	0	102.757
33867	CP0007	CP0237	0.0711144	-0.124283	Janamba Donalds Lagoon Station	Janamba Muk Muk Mugalimba	Janamba Donalds Lagoon Station_Janamba Muk Muk Mugalimba	0.752108	0	102.757
33832	CP0007	CP0225	0.0683499	-0.110856	Janamba Donalds Lagoon Station	Janamba Muk Muk Mugalimba	Janamba Donalds Lagoon Station_Janamba Muk Muk Mugalimba	0.756808	0	102.757
30661	CP0001	CP0240	0.102213	-0.312955	Janamba Donalds Lagoon Station	Janamba Swim Creek Station	Janamba Donalds Lagoon Station_Janamba Swim Creek Station	0.740867	0	77.8857
33943	CP0007	CP0240	0.0959151	-0.291667	Janamba Donalds Lagoon Station	Janamba Swim Creek Station	Janamba Donalds Lagoon Station_Janamba Swim Creek Station	0.743747	0	77.8857
30626	CP0001	CP0226	0.0913392	-0.229212	Janamba Donalds Lagoon Station	Janamba Swim Creek Station	Janamba Donalds Lagoon Station_Janamba Swim Creek Station	0.727529	0	77.8857
33908	CP0007	CP0226	0.0927948	-0.223132	Janamba Donalds Lagoon Station	Janamba Swim Creek Station	Janamba Donalds Lagoon Station_Janamba Swim Creek Station	0.723071	0	77.8857
30683	CP0001	CP0009	0.0834836	-0.172158	Janamba Donalds Lagoon Station	Janamba Swim Creek Station	Janamba Donalds Lagoon Station_Janamba Swim Creek Station	0.748738	0	77.8857
33965	CP0007	CP0009	0.0798774	-0.148338	Janamba Donalds Lagoon Station	Janamba Swim Creek Station	Janamba Donalds Lagoon Station_Janamba Swim Creek Station	0.749279	0	77.8857
30672	CP0001	CP0006	0.0704631	-0.143945	Janamba Donalds Lagoon Station	Janamba Swim Creek Station	Janamba Donalds Lagoon Station_Janamba Swim Creek Station	0.750405	0	77.8857
33884	CP0007	CP0010	0.0755772	-0.134901	Janamba Donalds Lagoon Station	Janamba Swim Creek Station	Janamba Donalds Lagoon Station_Janamba Swim Creek Station	0.751714	0	77.8857
30602	CP0001	CP0010	0.0753968	-0.131884	Janamba Donalds Lagoon Station	Janamba Swim Creek Station	Janamba Donalds Lagoon Station_Janamba Swim Creek Station	0.760823	0	77.8857
30614	CP0001	CP0224	0.0713899	-0.130065	Janamba Donalds Lagoon Station	Janamba Swim Creek Station	Janamba Donalds Lagoon Station_Janamba Swim Creek Station	0.757436	0	77.8857
30637	CP0001	CP0227	0.069282	-0.125181	Janamba Donalds Lagoon Station	Janamba Swim Creek Station	Janamba Donalds Lagoon Station_Janamba Swim Creek Station	0.757873	0	77.8857
33919	CP0007	CP0227	0.0698218	-0.10868	Janamba Donalds Lagoon Station	Janamba Swim Creek Station	Janamba Donalds Lagoon Station_Janamba Swim Creek Station	0.759403	0	77.8857
33896	CP0007	CP0224	0.0708491	-0.10318	Janamba Donalds Lagoon Station	Janamba Swim Creek Station	Janamba Donalds Lagoon Station_Janamba Swim Creek Station	0.763115	0	77.8857
30660	CP0001	CP0005	0.0646265	-0.098556	Janamba Donalds Lagoon Station	Janamba Swim Creek Station	Janamba Donalds Lagoon Station_Janamba Swim Creek Station	0.766157	0	77.8857
33954	CP0007	CP0006	0.0637953	-0.0891596	Janamba Donalds Lagoon Station	Janamba Swim Creek Station	Janamba Donalds Lagoon Station_Janamba Swim Creek Station	0.76311	0	77.8857
33942	CP0007	CP0005	0.0631863	-0.0747532	Janamba Donalds Lagoon Station	Janamba Swim Creek Station	Janamba Donalds Lagoon Station_Janamba Swim Creek Station	0.769757	0	77.8857
30649	CP0001	CP0228	0.060677	-0.0738801	Janamba Donalds Lagoon Station	Janamba Swim Creek Station	Janamba Donalds Lagoon Station_Janamba Swim Creek Station	0.774667	0	77.8857
33931	CP0007	CP0228	0.0586964	-0.0598095	Janamba Donalds Lagoon Station	Janamba Swim Creek Station	Janamba Donalds Lagoon Station_Janamba Swim Creek Station	0.773046	0	77.8857
30439	CP0001	CP0206	0.0776141	-0.16065	Janamba Donalds Lagoon Station	Walker Beatrice Hill Station	Janamba Donalds Lagoon Station_Walker Beatrice Hill Station	0.748832	0	8.7624
30497	CP0001	CP0398	0.0704403	-0.135116	Janamba Donalds Lagoon Station	Walker Beatrice Hill Station	Janamba Donalds Lagoon Station_Walker Beatrice Hill Station	0.754537	0	8.7624
33721	CP0007	CP0206	0.0727632	-0.12359	Janamba Donalds Lagoon Station	Walker Beatrice Hill Station	Janamba Donalds Lagoon Station_Walker Beatrice Hill Station	0.755031	0	8.7624
33779	CP0007	CP0398	0.0681042	-0.112465	Janamba Donalds Lagoon Station	Walker Beatrice Hill Station	Janamba Donalds Lagoon Station_Walker Beatrice Hill Station	0.756424	0	8.7624
30435	CP0001	CP0177	0.0729298	-0.158616	Janamba Donalds Lagoon Station	WHNT Adelaide River Station	Janamba Donalds Lagoon Station_WHNT Adelaide River Station	0.744746	0	9.85283
33717	CP0007	CP0177	0.068439	-0.126408	Janamba Donalds Lagoon Station	WHNT Adelaide River Station	Janamba Donalds Lagoon Station_WHNT Adelaide River Station	0.748877	0	9.85283
30475	CP0001	CP0296	0.0655767	-0.121934	Janamba Donalds Lagoon Station	WHNT Adelaide River Station	Janamba Donalds Lagoon Station_WHNT Adelaide River Station	0.755839	0	9.85283
33757	CP0007	CP0296	0.0653971	-0.10747	Janamba Donalds Lagoon Station	WHNT Adelaide River Station	Janamba Donalds Lagoon Station_WHNT Adelaide River Station	0.755659	0	9.85283
30467	CP0001	CP0181	0.188139	-8.87925	Janamba Donalds Lagoon Station	WHNT Arafura Swamp Darbilla Creek	Janamba Donalds Lagoon Station_WHNT Arafura Swamp Darbilla Creek	0.684945	1	418.829
33749	CP0007	CP0181	0.181387	-8.63776	Janamba Donalds Lagoon Station	WHNT Arafura Swamp Darbilla Creek	Janamba Donalds Lagoon Station_WHNT Arafura Swamp Darbilla Creek	0.69115	1	418.829
33734	CP0007	CP0026	0.11517	-0.334315	Janamba Donalds Lagoon Station	WHNT Arafura Swamp Darbilla Creek	Janamba Donalds Lagoon Station_WHNT Arafura Swamp Darbilla Creek	0.707396	1	418.829
30452	CP0001	CP0026	0.11481	-0.327872	Janamba Donalds Lagoon Station	WHNT Arafura Swamp Darbilla Creek	Janamba Donalds Lagoon Station_WHNT Arafura Swamp Darbilla Creek	0.710185	1	418.829
33770	CP0007	CP0065	0.101388	-0.308557	Janamba Donalds Lagoon Station	WHNT Arafura Swamp Darbilla Creek	Janamba Donalds Lagoon Station_WHNT Arafura Swamp Darbilla Creek	0.726799	1	418.829
30488	CP0001	CP0065	0.100658	-0.297675	Janamba Donalds Lagoon Station	WHNT Arafura Swamp Darbilla Creek	Janamba Donalds Lagoon Station_WHNT Arafura Swamp Darbilla Creek	0.730818	1	418.829
33748	CP0007	CP0163	0.111111	-0.278329	Janamba Donalds Lagoon Station	WHNT Arafura Swamp Darbilla Creek	Janamba Donalds Lagoon Station_WHNT Arafura Swamp Darbilla Creek	0.714646	1	418.829
30465	CP0001	CP0055	0.103262	-0.270682	Janamba Donalds Lagoon Station	WHNT Arafura Swamp Darbilla Creek	Janamba Donalds Lagoon Station_WHNT Arafura Swamp Darbilla Creek	0.72049	1	418.829
30498	CP0001	CP0040	0.101444	-0.265738	Janamba Donalds Lagoon Station	WHNT Arafura Swamp Darbilla Creek	Janamba Donalds Lagoon Station_WHNT Arafura Swamp Darbilla Creek	0.719404	1	418.829
30444	CP0001	CP0271	0.098683	-0.265399	Janamba Donalds Lagoon Station	WHNT Arafura Swamp Darbilla Creek	Janamba Donalds Lagoon Station_WHNT Arafura Swamp Darbilla Creek	0.717572	1	418.829
33780	CP0007	CP0040	0.103249	-0.262491	Janamba Donalds Lagoon Station	WHNT Arafura Swamp Darbilla Creek	Janamba Donalds Lagoon Station_WHNT Arafura Swamp Darbilla Creek	0.723105	1	418.829
30454	CP0001	CP0077	0.0981275	-0.261905	Janamba Donalds Lagoon Station	WHNT Arafura Swamp Darbilla Creek	Janamba Donalds Lagoon Station_WHNT Arafura Swamp Darbilla Creek	0.717861	1	418.829
30480	CP0001	CP0278	0.100792	-0.256859	Janamba Donalds Lagoon Station	WHNT Arafura Swamp Darbilla Creek	Janamba Donalds Lagoon Station_WHNT Arafura Swamp Darbilla Creek	0.723452	1	418.829
30466	CP0001	CP0163	0.102633	-0.255596	Janamba Donalds Lagoon Station	WHNT Arafura Swamp Darbilla Creek	Janamba Donalds Lagoon Station_WHNT Arafura Swamp Darbilla Creek	0.725108	1	418.829
33784	CP0007	CP0285	0.101295	-0.253531	Janamba Donalds Lagoon Station	WHNT Arafura Swamp Darbilla Creek	Janamba Donalds Lagoon Station_WHNT Arafura Swamp Darbilla Creek	0.717344	1	418.829
30502	CP0001	CP0285	0.0993163	-0.250181	Janamba Donalds Lagoon Station	WHNT Arafura Swamp Darbilla Creek	Janamba Donalds Lagoon Station_WHNT Arafura Swamp Darbilla Creek	0.72625	1	418.829
33736	CP0007	CP0077	0.103889	-0.248943	Janamba Donalds Lagoon Station	WHNT Arafura Swamp Darbilla Creek	Janamba Donalds Lagoon Station_WHNT Arafura Swamp Darbilla Creek	0.721192	1	418.829
33747	CP0007	CP0055	0.105244	-0.248762	Janamba Donalds Lagoon Station	WHNT Arafura Swamp Darbilla Creek	Janamba Donalds Lagoon Station_WHNT Arafura Swamp Darbilla Creek	0.723644	1	418.829
33712	CP0007	CP0075	0.100343	-0.247823	Janamba Donalds Lagoon Station	WHNT Arafura Swamp Darbilla Creek	Janamba Donalds Lagoon Station_WHNT Arafura Swamp Darbilla Creek	0.728388	1	418.829
30430	CP0001	CP0075	0.099982	-0.241104	Janamba Donalds Lagoon Station	WHNT Arafura Swamp Darbilla Creek	Janamba Donalds Lagoon Station_WHNT Arafura Swamp Darbilla Creek	0.731637	1	418.829
30479	CP0001	CP0182	0.0941833	-0.240781	Janamba Donalds Lagoon Station	WHNT Arafura Swamp Darbilla Creek	Janamba Donalds Lagoon Station_WHNT Arafura Swamp Darbilla Creek	0.725194	1	418.829
33713	CP0007	CP0174	0.0992394	-0.240227	Janamba Donalds Lagoon Station	WHNT Arafura Swamp Darbilla Creek	Janamba Donalds Lagoon Station_WHNT Arafura Swamp Darbilla Creek	0.722021	1	418.829
33762	CP0007	CP0278	0.0989921	-0.237818	Janamba Donalds Lagoon Station	WHNT Arafura Swamp Darbilla Creek	Janamba Donalds Lagoon Station_WHNT Arafura Swamp Darbilla Creek	0.722912	1	418.829
30418	CP0001	CP0072	0.0971573	-0.233923	Janamba Donalds Lagoon Station	WHNT Arafura Swamp Darbilla Creek	Janamba Donalds Lagoon Station_WHNT Arafura Swamp Darbilla Creek	0.731648	1	418.829
30431	CP0001	CP0174	0.0988772	-0.231636	Janamba Donalds Lagoon Station	WHNT Arafura Swamp Darbilla Creek	Janamba Donalds Lagoon Station_WHNT Arafura Swamp Darbilla Creek	0.734516	1	418.829
33771	CP0007	CP0168	0.099982	-0.230932	Janamba Donalds Lagoon Station	WHNT Arafura Swamp Darbilla Creek	Janamba Donalds Lagoon Station_WHNT Arafura Swamp Darbilla Creek	0.727076	1	418.829
30433	CP0001	CP0288	0.0906638	-0.230866	Janamba Donalds Lagoon Station	WHNT Arafura Swamp Darbilla Creek	Janamba Donalds Lagoon Station_WHNT Arafura Swamp Darbilla Creek	0.72648	1	418.829
33715	CP0007	CP0288	0.0913833	-0.22846	Janamba Donalds Lagoon Station	WHNT Arafura Swamp Darbilla Creek	Janamba Donalds Lagoon Station_WHNT Arafura Swamp Darbilla Creek	0.720273	1	418.829
33761	CP0007	CP0182	0.0986854	-0.225159	Janamba Donalds Lagoon Station	WHNT Arafura Swamp Darbilla Creek	Janamba Donalds Lagoon Station_WHNT Arafura Swamp Darbilla Creek	0.728075	1	418.829
30468	CP0001	CP0275	0.0830752	-0.22135	Janamba Donalds Lagoon Station	WHNT Arafura Swamp Darbilla Creek	Janamba Donalds Lagoon Station_WHNT Arafura Swamp Darbilla Creek	0.722991	1	418.829
33726	CP0007	CP0271	0.0930904	-0.220807	Janamba Donalds Lagoon Station	WHNT Arafura Swamp Darbilla Creek	Janamba Donalds Lagoon Station_WHNT Arafura Swamp Darbilla Creek	0.7256	1	418.829
30441	CP0001	CP0047	0.0930526	-0.219134	Janamba Donalds Lagoon Station	WHNT Arafura Swamp Darbilla Creek	Janamba Donalds Lagoon Station_WHNT Arafura Swamp Darbilla Creek	0.734521	1	418.829
30489	CP0001	CP0168	0.0931364	-0.217958	Janamba Donalds Lagoon Station	WHNT Arafura Swamp Darbilla Creek	Janamba Donalds Lagoon Station_WHNT Arafura Swamp Darbilla Creek	0.735903	1	418.829
30420	CP0001	CP0187	0.0865419	-0.21457	Janamba Donalds Lagoon Station	WHNT Arafura Swamp Darbilla Creek	Janamba Donalds Lagoon Station_WHNT Arafura Swamp Darbilla Creek	0.730928	1	418.829
30477	CP0001	CP0063	0.0914327	-0.212843	Janamba Donalds Lagoon Station	WHNT Arafura Swamp Darbilla Creek	Janamba Donalds Lagoon Station_WHNT Arafura Swamp Darbilla Creek	0.735781	1	418.829
30432	CP0001	CP0267	0.0874031	-0.212789	Janamba Donalds Lagoon Station	WHNT Arafura Swamp Darbilla Creek	Janamba Donalds Lagoon Station_WHNT Arafura Swamp Darbilla Creek	0.731844	1	418.829
33723	CP0007	CP0047	0.0937725	-0.21265	Janamba Donalds Lagoon Station	WHNT Arafura Swamp Darbilla Creek	Janamba Donalds Lagoon Station_WHNT Arafura Swamp Darbilla Creek	0.729752	1	418.829
33759	CP0007	CP0063	0.0917927	-0.210247	Janamba Donalds Lagoon Station	WHNT Arafura Swamp Darbilla Creek	Janamba Donalds Lagoon Station_WHNT Arafura Swamp Darbilla Creek	0.730022	1	418.829
30417	CP0001	CP0042	0.087536	-0.206381	Janamba Donalds Lagoon Station	WHNT Arafura Swamp Darbilla Creek	Janamba Donalds Lagoon Station_WHNT Arafura Swamp Darbilla Creek	0.7346	1	418.829
33727	CP0007	CP0291	0.0932158	-0.2061	Janamba Donalds Lagoon Station	WHNT Arafura Swamp Darbilla Creek	Janamba Donalds Lagoon Station_WHNT Arafura Swamp Darbilla Creek	0.732859	1	418.829
30476	CP0001	CP0028	0.0861046	-0.205267	Janamba Donalds Lagoon Station	WHNT Arafura Swamp Darbilla Creek	Janamba Donalds Lagoon Station_WHNT Arafura Swamp Darbilla Creek	0.734676	1	418.829
30490	CP0001	CP0183	0.0875899	-0.203001	Janamba Donalds Lagoon Station	WHNT Arafura Swamp Darbilla Creek	Janamba Donalds Lagoon Station_WHNT Arafura Swamp Darbilla Creek	0.73786	1	418.829
30421	CP0001	CP0286	0.0854624	-0.202854	Janamba Donalds Lagoon Station	WHNT Arafura Swamp Darbilla Creek	Janamba Donalds Lagoon Station_WHNT Arafura Swamp Darbilla Creek	0.735426	1	418.829
33758	CP0007	CP0028	0.0875427	-0.202465	Janamba Donalds Lagoon Station	WHNT Arafura Swamp Darbilla Creek	Janamba Donalds Lagoon Station_WHNT Arafura Swamp Darbilla Creek	0.728923	1	418.829
30445	CP0001	CP0291	0.0896167	-0.201659	Janamba Donalds Lagoon Station	WHNT Arafura Swamp Darbilla Creek	Janamba Donalds Lagoon Station_WHNT Arafura Swamp Darbilla Creek	0.739608	1	418.829
30419	CP0001	CP0173	0.0843525	-0.201374	Janamba Donalds Lagoon Station	WHNT Arafura Swamp Darbilla Creek	Janamba Donalds Lagoon Station_WHNT Arafura Swamp Darbilla Creek	0.735432	1	418.829
30487	CP0001	CP0031	0.0841727	-0.200577	Janamba Donalds Lagoon Station	WHNT Arafura Swamp Darbilla Creek	Janamba Donalds Lagoon Station_WHNT Arafura Swamp Darbilla Creek	0.734892	1	418.829
33735	CP0007	CP0051	0.0879971	-0.199823	Janamba Donalds Lagoon Station	WHNT Arafura Swamp Darbilla Creek	Janamba Donalds Lagoon Station_WHNT Arafura Swamp Darbilla Creek	0.7316	1	418.829
30442	CP0001	CP0076	0.0856473	-0.198987	Janamba Donalds Lagoon Station	WHNT Arafura Swamp Darbilla Creek	Janamba Donalds Lagoon Station_WHNT Arafura Swamp Darbilla Creek	0.737288	1	418.829
30456	CP0001	CP0273	0.0870665	-0.198407	Janamba Donalds Lagoon Station	WHNT Arafura Swamp Darbilla Creek	Janamba Donalds Lagoon Station_WHNT Arafura Swamp Darbilla Creek	0.73862	1	418.829
30478	CP0001	CP0166	0.0807554	-0.196674	Janamba Donalds Lagoon Station	WHNT Arafura Swamp Darbilla Creek	Janamba Donalds Lagoon Station_WHNT Arafura Swamp Darbilla Creek	0.734173	1	418.829
33737	CP0007	CP0180	0.0886806	-0.195483	Janamba Donalds Lagoon Station	WHNT Arafura Swamp Darbilla Creek	Janamba Donalds Lagoon Station_WHNT Arafura Swamp Darbilla Creek	0.733417	1	418.829
30453	CP0001	CP0051	0.0811589	-0.195087	Janamba Donalds Lagoon Station	WHNT Arafura Swamp Darbilla Creek	Janamba Donalds Lagoon Station_WHNT Arafura Swamp Darbilla Creek	0.734929	1	418.829
33750	CP0007	CP0275	0.078885	-0.192979	Janamba Donalds Lagoon Station	WHNT Arafura Swamp Darbilla Creek	Janamba Donalds Lagoon Station_WHNT Arafura Swamp Darbilla Creek	0.724631	1	418.829
33769	CP0007	CP0031	0.0852518	-0.192308	Janamba Donalds Lagoon Station	WHNT Arafura Swamp Darbilla Creek	Janamba Donalds Lagoon Station_WHNT Arafura Swamp Darbilla Creek	0.732374	1	418.829
33714	CP0007	CP0267	0.0857812	-0.188779	Janamba Donalds Lagoon Station	WHNT Arafura Swamp Darbilla Creek	Janamba Donalds Lagoon Station_WHNT Arafura Swamp Darbilla Creek	0.734006	1	418.829
30499	CP0001	CP0070	0.0791509	-0.186643	Janamba Donalds Lagoon Station	WHNT Arafura Swamp Darbilla Creek	Janamba Donalds Lagoon Station_WHNT Arafura Swamp Darbilla Creek	0.737003	1	418.829
30500	CP0001	CP0172	0.0833483	-0.186597	Janamba Donalds Lagoon Station	WHNT Arafura Swamp Darbilla Creek	Janamba Donalds Lagoon Station_WHNT Arafura Swamp Darbilla Creek	0.741224	1	418.829
33772	CP0007	CP0183	0.0863309	-0.186486	Janamba Donalds Lagoon Station	WHNT Arafura Swamp Darbilla Creek	Janamba Donalds Lagoon Station_WHNT Arafura Swamp Darbilla Creek	0.736421	1	418.829
33781	CP0007	CP0070	0.0809498	-0.182699	Janamba Donalds Lagoon Station	WHNT Arafura Swamp Darbilla Creek	Janamba Donalds Lagoon Station_WHNT Arafura Swamp Darbilla Creek	0.732416	1	418.829
30455	CP0001	CP0180	0.0821918	-0.181128	Janamba Donalds Lagoon Station	WHNT Arafura Swamp Darbilla Creek	Janamba Donalds Lagoon Station_WHNT Arafura Swamp Darbilla Creek	0.74261	1	418.829
33724	CP0007	CP0076	0.0840245	-0.18087	Janamba Donalds Lagoon Station	WHNT Arafura Swamp Darbilla Creek	Janamba Donalds Lagoon Station_WHNT Arafura Swamp Darbilla Creek	0.736837	1	418.829
33738	CP0007	CP0273	0.0854408	-0.177939	Janamba Donalds Lagoon Station	WHNT Arafura Swamp Darbilla Creek	Janamba Donalds Lagoon Station_WHNT Arafura Swamp Darbilla Creek	0.739613	1	418.829
33760	CP0007	CP0166	0.0827338	-0.177385	Janamba Donalds Lagoon Station	WHNT Arafura Swamp Darbilla Creek	Janamba Donalds Lagoon Station_WHNT Arafura Swamp Darbilla Creek	0.73795	1	418.829
30501	CP0001	CP0184	0.0776857	-0.172563	Janamba Donalds Lagoon Station	WHNT Arafura Swamp Darbilla Creek	Janamba Donalds Lagoon Station_WHNT Arafura Swamp Darbilla Creek	0.741889	1	418.829
33782	CP0007	CP0172	0.080468	-0.165194	Janamba Donalds Lagoon Station	WHNT Arafura Swamp Darbilla Creek	Janamba Donalds Lagoon Station_WHNT Arafura Swamp Darbilla Creek	0.741584	1	418.829
30429	CP0001	CP0045	0.0756786	-0.163594	Janamba Donalds Lagoon Station	WHNT Arafura Swamp Darbilla Creek	Janamba Donalds Lagoon Station_WHNT Arafura Swamp Darbilla Creek	0.745731	1	418.829
33783	CP0007	CP0184	0.0737203	-0.151483	Janamba Donalds Lagoon Station	WHNT Arafura Swamp Darbilla Creek	Janamba Donalds Lagoon Station_WHNT Arafura Swamp Darbilla Creek	0.741168	1	418.829
33711	CP0007	CP0045	0.0767571	-0.150247	Janamba Donalds Lagoon Station	WHNT Arafura Swamp Darbilla Creek	Janamba Donalds Lagoon Station_WHNT Arafura Swamp Darbilla Creek	0.745731	1	418.829
30443	CP0001	CP0175	0.0769231	-0.144975	Janamba Donalds Lagoon Station	WHNT Arafura Swamp Darbilla Creek	Janamba Donalds Lagoon Station_WHNT Arafura Swamp Darbilla Creek	0.75554	1	418.829
30491	CP0001	CP0281	0.0711455	-0.140173	Janamba Donalds Lagoon Station	WHNT Arafura Swamp Darbilla Creek	Janamba Donalds Lagoon Station_WHNT Arafura Swamp Darbilla Creek	0.751981	1	418.829
33773	CP0007	CP0281	0.0695245	-0.133922	Janamba Donalds Lagoon Station	WHNT Arafura Swamp Darbilla Creek	Janamba Donalds Lagoon Station_WHNT Arafura Swamp Darbilla Creek	0.746398	1	418.829
33725	CP0007	CP0175	0.0763826	-0.132581	Janamba Donalds Lagoon Station	WHNT Arafura Swamp Darbilla Creek	Janamba Donalds Lagoon Station_WHNT Arafura Swamp Darbilla Creek	0.753198	1	418.829
30464	CP0001	CP0027	0.0578616	-0.121294	Janamba Donalds Lagoon Station	WHNT Arafura Swamp Darbilla Creek	Janamba Donalds Lagoon Station_WHNT Arafura Swamp Darbilla Creek	0.749057	1	418.829
33746	CP0007	CP0027	0.0591195	-0.109309	Janamba Donalds Lagoon Station	WHNT Arafura Swamp Darbilla Creek	Janamba Donalds Lagoon Station_WHNT Arafura Swamp Darbilla Creek	0.748607	1	418.829
30586	CP0001	CP0252	0.0754411	-0.141775	Janamba Donalds Lagoon Station	WHNT Elizabeth Downs Station	Janamba Donalds Lagoon Station_WHNT Elizabeth Downs Station	0.755131	0	151.917
33866	CP0007	CP0179	0.0770338	-0.133746	Janamba Donalds Lagoon Station	WHNT Elizabeth Downs Station	Janamba Donalds Lagoon Station_WHNT Elizabeth Downs Station	0.75423	0	151.917
30584	CP0001	CP0179	0.075054	-0.132683	Janamba Donalds Lagoon Station	WHNT Elizabeth Downs Station	Janamba Donalds Lagoon Station_WHNT Elizabeth Downs Station	0.760079	0	151.917
33868	CP0007	CP0252	0.0693194	-0.113717	Janamba Donalds Lagoon Station	WHNT Elizabeth Downs Station	Janamba Donalds Lagoon Station_WHNT Elizabeth Downs Station	0.755942	0	151.917
33938	CP0007	CP0034	0.103821	-0.268222	Janamba Donalds Lagoon Station	WHNT King River Goomadeer River	Janamba Donalds Lagoon Station_WHNT King River Goomadeer River	0.723864	1	293.436
30659	CP0001	CP0331	0.0952639	-0.249455	Janamba Donalds Lagoon Station	WHNT King River Goomadeer River	Janamba Donalds Lagoon Station_WHNT King River Goomadeer River	0.722162	1	293.436
30656	CP0001	CP0034	0.0982336	-0.240707	Janamba Donalds Lagoon Station	WHNT King River Goomadeer River	Janamba Donalds Lagoon Station_WHNT King River Goomadeer River	0.731885	1	293.436
33941	CP0007	CP0331	0.0977946	-0.238806	Janamba Donalds Lagoon Station	WHNT King River Goomadeer River	Janamba Donalds Lagoon Station_WHNT King River Goomadeer River	0.721981	1	293.436
30624	CP0001	CP0301	0.0795536	-0.179088	Janamba Donalds Lagoon Station	WHNT King River Goomadeer River	Janamba Donalds Lagoon Station_WHNT King River Goomadeer River	0.741721	1	293.436
33906	CP0007	CP0301	0.0820734	-0.178344	Janamba Donalds Lagoon Station	WHNT King River Goomadeer River	Janamba Donalds Lagoon Station_WHNT King River Goomadeer River	0.737041	1	293.436
30635	CP0001	CP0308	0.0760244	-0.172675	Janamba Donalds Lagoon Station	WHNT King River Goomadeer River	Janamba Donalds Lagoon Station_WHNT King River Goomadeer River	0.740654	1	293.436
33973	CP0007	CP0263	0.0758311	-0.170014	Janamba Donalds Lagoon Station	WHNT King River Goomadeer River	Janamba Donalds Lagoon Station_WHNT King River Goomadeer River	0.734142	1	293.436
30679	CP0001	CP0057	0.0767571	-0.163357	Janamba Donalds Lagoon Station	WHNT King River Goomadeer River	Janamba Donalds Lagoon Station_WHNT King River Goomadeer River	0.74645	1	293.436
30691	CP0001	CP0263	0.0731357	-0.162942	Janamba Donalds Lagoon Station	WHNT King River Goomadeer River	Janamba Donalds Lagoon Station_WHNT King River Goomadeer River	0.742677	1	293.436
30690	CP0001	CP0066	0.0727501	-0.156273	Janamba Donalds Lagoon Station	WHNT King River Goomadeer River	Janamba Donalds Lagoon Station_WHNT King River Goomadeer River	0.745734	1	293.436
33917	CP0007	CP0308	0.0749461	-0.155215	Janamba Donalds Lagoon Station	WHNT King River Goomadeer River	Janamba Donalds Lagoon Station_WHNT King River Goomadeer River	0.740744	1	293.436
30622	CP0001	CP0170	0.0752475	-0.15163	Janamba Donalds Lagoon Station	WHNT King River Goomadeer River	Janamba Donalds Lagoon Station_WHNT King River Goomadeer River	0.751485	1	293.436
30648	CP0001	CP0380	0.0718954	-0.147562	Janamba Donalds Lagoon Station	WHNT King River Goomadeer River	Janamba Donalds Lagoon Station_WHNT King River Goomadeer River	0.74882	1	293.436
33961	CP0007	CP0057	0.0751393	-0.146934	Janamba Donalds Lagoon Station	WHNT King River Goomadeer River	Janamba Donalds Lagoon Station_WHNT King River Goomadeer River	0.745102	1	293.436
30625	CP0001	CP0360	0.0714286	-0.138526	Janamba Donalds Lagoon Station	WHNT King River Goomadeer River	Janamba Donalds Lagoon Station_WHNT King River Goomadeer River	0.753436	1	293.436
33904	CP0007	CP0170	0.0729073	-0.134099	Janamba Donalds Lagoon Station	WHNT King River Goomadeer River	Janamba Donalds Lagoon Station_WHNT King River Goomadeer River	0.749865	1	293.436
33894	CP0007	CP0300	0.0718013	-0.13391	Janamba Donalds Lagoon Station	WHNT King River Goomadeer River	Janamba Donalds Lagoon Station_WHNT King River Goomadeer River	0.748515	1	293.436
30612	CP0001	CP0300	0.0651431	-0.133406	Janamba Donalds Lagoon Station	WHNT King River Goomadeer River	Janamba Donalds Lagoon Station_WHNT King River Goomadeer River	0.749865	1	293.436
33972	CP0007	CP0066	0.0698761	-0.122269	Janamba Donalds Lagoon Station	WHNT King River Goomadeer River	Janamba Donalds Lagoon Station_WHNT King River Goomadeer River	0.75265	1	293.436
33930	CP0007	CP0380	0.0684459	-0.119141	Janamba Donalds Lagoon Station	WHNT King River Goomadeer River	Janamba Donalds Lagoon Station_WHNT King River Goomadeer River	0.751906	1	293.436
33907	CP0007	CP0360	0.0688969	-0.116135	Janamba Donalds Lagoon Station	WHNT King River Goomadeer River	Janamba Donalds Lagoon Station_WHNT King River Goomadeer River	0.754702	1	293.436
30525	CP0001	CP0053	0.0952039	-0.237434	Janamba Donalds Lagoon Station	WHNT Labelle Downs Station	Janamba Donalds Lagoon Station_WHNT Labelle Downs Station	0.742051	0	113.364
33807	CP0007	CP0053	0.0959224	-0.233508	Janamba Donalds Lagoon Station	WHNT Labelle Downs Station	Janamba Donalds Lagoon Station_WHNT Labelle Downs Station	0.744387	0	113.364
30552	CP0001	CP0268	0.0831384	-0.194906	Janamba Donalds Lagoon Station	WHNT Labelle Downs Station	Janamba Donalds Lagoon Station_WHNT Labelle Downs Station	0.736998	0	113.364
33855	CP0007	CP0176	0.0799784	-0.17673	Janamba Donalds Lagoon Station	WHNT Labelle Downs Station	Janamba Donalds Lagoon Station_WHNT Labelle Downs Station	0.749641	0	113.364
33834	CP0007	CP0268	0.0827785	-0.175723	Janamba Donalds Lagoon Station	WHNT Labelle Downs Station	Janamba Donalds Lagoon Station_WHNT Labelle Downs Station	0.738168	0	113.364
30573	CP0001	CP0176	0.0794393	-0.168755	Janamba Donalds Lagoon Station	WHNT Labelle Downs Station	Janamba Donalds Lagoon Station_WHNT Labelle Downs Station	0.753235	0	113.364
30516	CP0001	CP0257	0.0768124	-0.166065	Janamba Donalds Lagoon Station	WHNT Labelle Downs Station	Janamba Donalds Lagoon Station_WHNT Labelle Downs Station	0.744918	0	113.364
30563	CP0001	CP0250	0.0773799	-0.157762	Janamba Donalds Lagoon Station	WHNT Labelle Downs Station	Janamba Donalds Lagoon Station_WHNT Labelle Downs Station	0.749505	0	113.364
30514	CP0001	CP0193	0.0756893	-0.157246	Janamba Donalds Lagoon Station	WHNT Labelle Downs Station	Janamba Donalds Lagoon Station_WHNT Labelle Downs Station	0.748784	0	113.364
30587	CP0001	CP0272	0.080101	-0.154423	Janamba Donalds Lagoon Station	WHNT Labelle Downs Station	Janamba Donalds Lagoon Station_WHNT Labelle Downs Station	0.757081	0	113.364
33798	CP0007	CP0257	0.0753733	-0.15367	Janamba Donalds Lagoon Station	WHNT Labelle Downs Station	Janamba Donalds Lagoon Station_WHNT Labelle Downs Station	0.74213	0	113.364
33869	CP0007	CP0272	0.0757712	-0.149123	Janamba Donalds Lagoon Station	WHNT Labelle Downs Station	Janamba Donalds Lagoon Station_WHNT Labelle Downs Station	0.755367	0	113.364
30528	CP0001	CP0259	0.0738207	-0.147038	Janamba Donalds Lagoon Station	WHNT Labelle Downs Station	Janamba Donalds Lagoon Station_WHNT Labelle Downs Station	0.75135	0	113.364
33822	CP0007	CP0262	0.0803025	-0.146789	Janamba Donalds Lagoon Station	WHNT Labelle Downs Station	Janamba Donalds Lagoon Station_WHNT Labelle Downs Station	0.75027	0	113.364
33810	CP0007	CP0259	0.0754411	-0.142555	Janamba Donalds Lagoon Station	WHNT Labelle Downs Station	Janamba Donalds Lagoon Station_WHNT Labelle Downs Station	0.747569	0	113.364
30540	CP0001	CP0262	0.073834	-0.142341	Janamba Donalds Lagoon Station	WHNT Labelle Downs Station	Janamba Donalds Lagoon Station_WHNT Labelle Downs Station	0.753647	0	113.364
33845	CP0007	CP0250	0.0746806	-0.135145	Janamba Donalds Lagoon Station	WHNT Labelle Downs Station	Janamba Donalds Lagoon Station_WHNT Labelle Downs Station	0.750765	0	113.364
33796	CP0007	CP0193	0.0751487	-0.132155	Janamba Donalds Lagoon Station	WHNT Labelle Downs Station	Janamba Donalds Lagoon Station_WHNT Labelle Downs Station	0.752748	0	113.364
30597	CP0001	CP0255	0.0635354	-0.117188	Janamba Donalds Lagoon Station	WHNT Labelle Downs Station	Janamba Donalds Lagoon Station_WHNT Labelle Downs Station	0.754324	0	113.364
30594	CP0001	CP0044	0.0650144	-0.113817	Janamba Donalds Lagoon Station	WHNT Labelle Downs Station	Janamba Donalds Lagoon Station_WHNT Labelle Downs Station	0.759429	0	113.364
33879	CP0007	CP0255	0.06572	-0.113523	Janamba Donalds Lagoon Station	WHNT Labelle Downs Station	Janamba Donalds Lagoon Station_WHNT Labelle Downs Station	0.751866	0	113.364
33876	CP0007	CP0044	0.0678879	-0.105708	Janamba Donalds Lagoon Station	WHNT Labelle Downs Station	Janamba Donalds Lagoon Station_WHNT Labelle Downs Station	0.759159	0	113.364
33833	CP0007	CP0247	0.107626	-0.535398	Janamba Donalds Lagoon Station	WHNT Litchfield Station	Janamba Donalds Lagoon Station_WHNT Litchfield Station	0.727961	0	106.407
30551	CP0001	CP0247	0.106905	-0.514995	Janamba Donalds Lagoon Station	WHNT Litchfield Station	Janamba Donalds Lagoon Station_WHNT Litchfield Station	0.734721	0	106.407
33821	CP0007	CP0246	0.0919582	-0.270602	Janamba Donalds Lagoon Station	WHNT Litchfield Station	Janamba Donalds Lagoon Station_WHNT Litchfield Station	0.741255	0	106.407
30539	CP0001	CP0246	0.0926794	-0.264473	Janamba Donalds Lagoon Station	WHNT Litchfield Station	Janamba Donalds Lagoon Station_WHNT Litchfield Station	0.745041	0	106.407
30512	CP0001	CP0025	0.0859249	-0.203577	Janamba Donalds Lagoon Station	WHNT Litchfield Station	Janamba Donalds Lagoon Station_WHNT Litchfield Station	0.735844	0	106.407
33794	CP0007	CP0025	0.0846665	-0.196504	Janamba Donalds Lagoon Station	WHNT Litchfield Station	Janamba Donalds Lagoon Station_WHNT Litchfield Station	0.730092	0	106.407
30527	CP0001	CP0244	0.0880503	-0.193489	Janamba Donalds Lagoon Station	WHNT Litchfield Station	Janamba Donalds Lagoon Station_WHNT Litchfield Station	0.74735	0	106.407
33809	CP0007	CP0244	0.0823001	-0.166849	Janamba Donalds Lagoon Station	WHNT Litchfield Station	Janamba Donalds Lagoon Station_WHNT Litchfield Station	0.754447	0	106.407
30572	CP0001	CP0036	0.0768954	-0.164198	Janamba Donalds Lagoon Station	WHNT Litchfield Station	Janamba Donalds Lagoon Station_WHNT Litchfield Station	0.746586	0	106.407
30593	CP0001	CP0019	0.0777658	-0.162816	Janamba Donalds Lagoon Station	WHNT Litchfield Station	Janamba Donalds Lagoon Station_WHNT Litchfield Station	0.748024	0	106.407
30595	CP0001	CP0190	0.0718391	-0.156633	Janamba Donalds Lagoon Station	WHNT Litchfield Station	Janamba Donalds Lagoon Station_WHNT Litchfield Station	0.744702	0	106.407
33875	CP0007	CP0019	0.0806394	-0.155634	Janamba Donalds Lagoon Station	WHNT Litchfield Station	Janamba Donalds Lagoon Station_WHNT Litchfield Station	0.746228	0	106.407
30537	CP0001	CP0071	0.0746	-0.152597	Janamba Donalds Lagoon Station	WHNT Litchfield Station	Janamba Donalds Lagoon Station_WHNT Litchfield Station	0.749416	0	106.407
30576	CP0001	CP0270	0.0717002	-0.151708	Janamba Donalds Lagoon Station	WHNT Litchfield Station	Janamba Donalds Lagoon Station_WHNT Litchfield Station	0.746967	0	106.407
30536	CP0001	CP0030	0.0743802	-0.149097	Janamba Donalds Lagoon Station	WHNT Litchfield Station	Janamba Donalds Lagoon Station_WHNT Litchfield Station	0.751347	0	106.407
30560	CP0001	CP0035	0.0716338	-0.144557	Janamba Donalds Lagoon Station	WHNT Litchfield Station	Janamba Donalds Lagoon Station_WHNT Litchfield Station	0.750628	0	106.407
33854	CP0007	CP0036	0.0733022	-0.138752	Janamba Donalds Lagoon Station	WHNT Litchfield Station	Janamba Donalds Lagoon Station_WHNT Litchfield Station	0.747844	0	106.407
30583	CP0001	CP0043	0.0679245	-0.136364	Janamba Donalds Lagoon Station	WHNT Litchfield Station	Janamba Donalds Lagoon Station_WHNT Litchfield Station	0.750943	0	106.407
33818	CP0007	CP0030	0.0754581	-0.136219	Janamba Donalds Lagoon Station	WHNT Litchfield Station	Janamba Donalds Lagoon Station_WHNT Litchfield Station	0.751976	0	106.407
33858	CP0007	CP0270	0.0706138	-0.131831	Janamba Donalds Lagoon Station	WHNT Litchfield Station	Janamba Donalds Lagoon Station_WHNT Litchfield Station	0.748235	0	106.407
33819	CP0007	CP0071	0.0719036	-0.131254	Janamba Donalds Lagoon Station	WHNT Litchfield Station	Janamba Donalds Lagoon Station_WHNT Litchfield Station	0.749865	0	106.407
30513	CP0001	CP0046	0.065851	-0.130411	Janamba Donalds Lagoon Station	WHNT Litchfield Station	Janamba Donalds Lagoon Station_WHNT Litchfield Station	0.751439	0	106.407
33857	CP0007	CP0251	0.0742342	-0.130205	Janamba Donalds Lagoon Station	WHNT Litchfield Station	Janamba Donalds Lagoon Station_WHNT Litchfield Station	0.752432	0	106.407
30526	CP0001	CP0196	0.0707089	-0.129603	Janamba Donalds Lagoon Station	WHNT Litchfield Station	Janamba Donalds Lagoon Station_WHNT Litchfield Station	0.756927	0	106.407
33808	CP0007	CP0196	0.0735876	-0.128879	Janamba Donalds Lagoon Station	WHNT Litchfield Station	Janamba Donalds Lagoon Station_WHNT Litchfield Station	0.752699	0	106.407
33842	CP0007	CP0035	0.0710952	-0.127641	Janamba Donalds Lagoon Station	WHNT Litchfield Station	Janamba Donalds Lagoon Station_WHNT Litchfield Station	0.751077	0	106.407
30564	CP0001	CP0269	0.0688601	-0.124278	Janamba Donalds Lagoon Station	WHNT Litchfield Station	Janamba Donalds Lagoon Station_WHNT Litchfield Station	0.757731	0	106.407
33865	CP0007	CP0043	0.0673854	-0.116279	Janamba Donalds Lagoon Station	WHNT Litchfield Station	Janamba Donalds Lagoon Station_WHNT Litchfield Station	0.7531	0	106.407
33846	CP0007	CP0269	0.0690399	-0.115927	Janamba Donalds Lagoon Station	WHNT Litchfield Station	Janamba Donalds Lagoon Station_WHNT Litchfield Station	0.754764	0	106.407
30575	CP0001	CP0251	0.0679279	-0.115788	Janamba Donalds Lagoon Station	WHNT Litchfield Station	Janamba Donalds Lagoon Station_WHNT Litchfield Station	0.760811	0	106.407
33877	CP0007	CP0190	0.0666307	-0.109331	Janamba Donalds Lagoon Station	WHNT Litchfield Station	Janamba Donalds Lagoon Station_WHNT Litchfield Station	0.755837	0	106.407
33795	CP0007	CP0046	0.0620727	-0.102297	Janamba Donalds Lagoon Station	WHNT Litchfield Station	Janamba Donalds Lagoon Station_WHNT Litchfield Station	0.755398	0	106.407
33892	CP0007	CP0165	0.097447	-0.242227	Janamba Donalds Lagoon Station	WHNT Maningrida Bawinanga Liverpool Rv Blyth Rv	Janamba Donalds Lagoon Station_WHNT Maningrida Bawinanga Liverpool Rv Blyth Rv	0.728335	1	346.642
30610	CP0001	CP0165	0.095649	-0.240968	Janamba Donalds Lagoon Station	WHNT Maningrida Bawinanga Liverpool Rv Blyth Rv	Janamba Donalds Lagoon Station_WHNT Maningrida Bawinanga Liverpool Rv Blyth Rv	0.726897	1	346.642
30645	CP0001	CP0186	0.0919065	-0.237726	Janamba Donalds Lagoon Station	WHNT Maningrida Bawinanga Liverpool Rv Blyth Rv	Janamba Donalds Lagoon Station_WHNT Maningrida Bawinanga Liverpool Rv Blyth Rv	0.724371	1	346.642
30636	CP0001	CP0374	0.0971543	-0.234	Janamba Donalds Lagoon Station	WHNT Maningrida Bawinanga Liverpool Rv Blyth Rv	Janamba Donalds Lagoon Station_WHNT Maningrida Bawinanga Liverpool Rv Blyth Rv	0.731285	1	346.642
30600	CP0001	CP0297	0.0917266	-0.226517	Janamba Donalds Lagoon Station	WHNT Maningrida Bawinanga Liverpool Rv Blyth Rv	Janamba Donalds Lagoon Station_WHNT Maningrida Bawinanga Liverpool Rv Blyth Rv	0.730036	1	346.642
30671	CP0001	CP0337	0.089266	-0.224945	Janamba Donalds Lagoon Station	WHNT Maningrida Bawinanga Liverpool Rv Blyth Rv	Janamba Donalds Lagoon Station_WHNT Maningrida Bawinanga Liverpool Rv Blyth Rv	0.726392	1	346.642
33918	CP0007	CP0374	0.0949792	-0.221079	Janamba Donalds Lagoon Station	WHNT Maningrida Bawinanga Liverpool Rv Blyth Rv	Janamba Donalds Lagoon Station_WHNT Maningrida Bawinanga Liverpool Rv Blyth Rv	0.726663	1	346.642
33927	CP0007	CP0186	0.092446	-0.220423	Janamba Donalds Lagoon Station	WHNT Maningrida Bawinanga Liverpool Rv Blyth Rv	Janamba Donalds Lagoon Station_WHNT Maningrida Bawinanga Liverpool Rv Blyth Rv	0.72446	1	346.642
30632	CP0001	CP0023	0.0888448	-0.216691	Janamba Donalds Lagoon Station	WHNT Maningrida Bawinanga Liverpool Rv Blyth Rv	Janamba Donalds Lagoon Station_WHNT Maningrida Bawinanga Liverpool Rv Blyth Rv	0.732114	1	346.642
33882	CP0007	CP0297	0.0920863	-0.212976	Janamba Donalds Lagoon Station	WHNT Maningrida Bawinanga Liverpool Rv Blyth Rv	Janamba Donalds Lagoon Station_WHNT Maningrida Bawinanga Liverpool Rv Blyth Rv	0.728417	1	346.642
30647	CP0001	CP0329	0.0871226	-0.212673	Janamba Donalds Lagoon Station	WHNT Maningrida Bawinanga Liverpool Rv Blyth Rv	Janamba Donalds Lagoon Station_WHNT Maningrida Bawinanga Liverpool Rv Blyth Rv	0.731175	1	346.642
30613	CP0001	CP0342	0.0816179	-0.20942	Janamba Donalds Lagoon Station	WHNT Maningrida Bawinanga Liverpool Rv Blyth Rv	Janamba Donalds Lagoon Station_WHNT Maningrida Bawinanga Liverpool Rv Blyth Rv	0.728061	1	346.642
33914	CP0007	CP0023	0.0874031	-0.20461	Janamba Donalds Lagoon Station	WHNT Maningrida Bawinanga Liverpool Rv Blyth Rv	Janamba Donalds Lagoon Station_WHNT Maningrida Bawinanga Liverpool Rv Blyth Rv	0.729321	1	346.642
30682	CP0001	CP0338	0.0825041	-0.204512	Janamba Donalds Lagoon Station	WHNT Maningrida Bawinanga Liverpool Rv Blyth Rv	Janamba Donalds Lagoon Station_WHNT Maningrida Bawinanga Liverpool Rv Blyth Rv	0.732224	1	346.642
33895	CP0007	CP0342	0.0868545	-0.202086	Janamba Donalds Lagoon Station	WHNT Maningrida Bawinanga Liverpool Rv Blyth Rv	Janamba Donalds Lagoon Station_WHNT Maningrida Bawinanga Liverpool Rv Blyth Rv	0.728332	1	346.642
33939	CP0007	CP0191	0.0837989	-0.20131	Janamba Donalds Lagoon Station	WHNT Maningrida Bawinanga Liverpool Rv Blyth Rv	Janamba Donalds Lagoon Station_WHNT Maningrida Bawinanga Liverpool Rv Blyth Rv	0.726888	1	346.642
33953	CP0007	CP0337	0.0922169	-0.198782	Janamba Donalds Lagoon Station	WHNT Maningrida Bawinanga Liverpool Rv Blyth Rv	Janamba Donalds Lagoon Station_WHNT Maningrida Bawinanga Liverpool Rv Blyth Rv	0.732387	1	346.642
30657	CP0001	CP0191	0.0774914	-0.181802	Janamba Donalds Lagoon Station	WHNT Maningrida Bawinanga Liverpool Rv Blyth Rv	Janamba Donalds Lagoon Station_WHNT Maningrida Bawinanga Liverpool Rv Blyth Rv	0.737881	1	346.642
33964	CP0007	CP0338	0.0810566	-0.180851	Janamba Donalds Lagoon Station	WHNT Maningrida Bawinanga Liverpool Rv Blyth Rv	Janamba Donalds Lagoon Station_WHNT Maningrida Bawinanga Liverpool Rv Blyth Rv	0.733671	1	346.642
33926	CP0007	CP0033	0.0796047	-0.178999	Janamba Donalds Lagoon Station	WHNT Maningrida Bawinanga Liverpool Rv Blyth Rv	Janamba Donalds Lagoon Station_WHNT Maningrida Bawinanga Liverpool Rv Blyth Rv	0.733333	1	346.642
30680	CP0001	CP0253	0.0711207	-0.172924	Janamba Donalds Lagoon Station	WHNT Maningrida Bawinanga Liverpool Rv Blyth Rv	Janamba Donalds Lagoon Station_WHNT Maningrida Bawinanga Liverpool Rv Blyth Rv	0.736351	1	346.642
33929	CP0007	CP0329	0.0796653	-0.167317	Janamba Donalds Lagoon Station	WHNT Maningrida Bawinanga Liverpool Rv Blyth Rv	Janamba Donalds Lagoon Station_WHNT Maningrida Bawinanga Liverpool Rv Blyth Rv	0.737632	1	346.642
30601	CP0001	CP0340	0.074014	-0.166667	Janamba Donalds Lagoon Station	WHNT Maningrida Bawinanga Liverpool Rv Blyth Rv	Janamba Donalds Lagoon Station_WHNT Maningrida Bawinanga Liverpool Rv Blyth Rv	0.741221	1	346.642
30633	CP0001	CP0171	0.0779783	-0.16546	Janamba Donalds Lagoon Station	WHNT Maningrida Bawinanga Liverpool Rv Blyth Rv	Janamba Donalds Lagoon Station_WHNT Maningrida Bawinanga Liverpool Rv Blyth Rv	0.746209	1	346.642
30644	CP0001	CP0033	0.0734951	-0.165224	Janamba Donalds Lagoon Station	WHNT Maningrida Bawinanga Liverpool Rv Blyth Rv	Janamba Donalds Lagoon Station_WHNT Maningrida Bawinanga Liverpool Rv Blyth Rv	0.742138	1	346.642
33915	CP0007	CP0171	0.0796029	-0.164958	Janamba Donalds Lagoon Station	WHNT Maningrida Bawinanga Liverpool Rv Blyth Rv	Janamba Donalds Lagoon Station_WHNT Maningrida Bawinanga Liverpool Rv Blyth Rv	0.740162	1	346.642
33962	CP0007	CP0253	0.0723779	-0.161029	Janamba Donalds Lagoon Station	WHNT Maningrida Bawinanga Liverpool Rv Blyth Rv	Janamba Donalds Lagoon Station_WHNT Maningrida Bawinanga Liverpool Rv Blyth Rv	0.735453	1	346.642
33883	CP0007	CP0340	0.0729335	-0.156714	Janamba Donalds Lagoon Station	WHNT Maningrida Bawinanga Liverpool Rv Blyth Rv	Janamba Donalds Lagoon Station_WHNT Maningrida Bawinanga Liverpool Rv Blyth Rv	0.73825	1	346.642
30668	CP0001	CP0037	0.0720187	-0.153389	Janamba Donalds Lagoon Station	WHNT Maningrida Bawinanga Liverpool Rv Blyth Rv	Janamba Donalds Lagoon Station_WHNT Maningrida Bawinanga Liverpool Rv Blyth Rv	0.746498	1	346.642
30669	CP0001	CP0245	0.0732759	-0.149964	Janamba Donalds Lagoon Station	WHNT Maningrida Bawinanga Liverpool Rv Blyth Rv	Janamba Donalds Lagoon Station_WHNT Maningrida Bawinanga Liverpool Rv Blyth Rv	0.749461	1	346.642
33951	CP0007	CP0245	0.0729167	-0.148944	Janamba Donalds Lagoon Station	WHNT Maningrida Bawinanga Liverpool Rv Blyth Rv	Janamba Donalds Lagoon Station_WHNT Maningrida Bawinanga Liverpool Rv Blyth Rv	0.741918	1	346.642
33950	CP0007	CP0037	0.0682471	-0.136796	Janamba Donalds Lagoon Station	WHNT Maningrida Bawinanga Liverpool Rv Blyth Rv	Janamba Donalds Lagoon Station_WHNT Maningrida Bawinanga Liverpool Rv Blyth Rv	0.743445	1	346.642
30621	CP0001	CP0020	0.0668223	-0.128793	Janamba Donalds Lagoon Station	WHNT Maningrida Bawinanga Liverpool Rv Blyth Rv	Janamba Donalds Lagoon Station_WHNT Maningrida Bawinanga Liverpool Rv Blyth Rv	0.754176	1	346.642
33903	CP0007	CP0020	0.0648464	-0.10621	Janamba Donalds Lagoon Station	WHNT Maningrida Bawinanga Liverpool Rv Blyth Rv	Janamba Donalds Lagoon Station_WHNT Maningrida Bawinanga Liverpool Rv Blyth Rv	0.756242	1	346.642
33963	CP0007	CP0256	0.0874346	-0.234594	Janamba Donalds Lagoon Station	WHNT Tiwi Islands	Janamba Donalds Lagoon Station_WHNT Tiwi Islands	0.747882	0	140.757
30519	CP0001	CP0054	0.0925793	-0.233526	Janamba Donalds Lagoon Station	WHNT Tiwi Islands	Janamba Donalds Lagoon Station_WHNT Tiwi Islands	0.727666	0	140.757
30681	CP0001	CP0256	0.0888769	-0.228728	Janamba Donalds Lagoon Station	WHNT Tiwi Islands	Janamba Donalds Lagoon Station_WHNT Tiwi Islands	0.752299	0	140.757
33801	CP0007	CP0054	0.092219	-0.214791	Janamba Donalds Lagoon Station	WHNT Tiwi Islands	Janamba Donalds Lagoon Station_WHNT Tiwi Islands	0.728386	0	140.757
30598	CP0001	CP0021	0.0845655	-0.20152	Janamba Donalds Lagoon Station	WHNT Tiwi Islands	Janamba Donalds Lagoon Station_WHNT Tiwi Islands	0.734944	0	140.757
30508	CP0001	CP0078	0.0842636	-0.193881	Janamba Donalds Lagoon Station	WHNT Tiwi Islands	Janamba Donalds Lagoon Station_WHNT Tiwi Islands	0.739197	0	140.757
30520	CP0001	CP0167	0.0783891	-0.184563	Janamba Donalds Lagoon Station	WHNT Tiwi Islands	Janamba Donalds Lagoon Station_WHNT Tiwi Islands	0.737954	0	140.757
30670	CP0001	CP0254	0.0750135	-0.180866	Janamba Donalds Lagoon Station	WHNT Tiwi Islands	Janamba Donalds Lagoon Station_WHNT Tiwi Islands	0.735744	0	140.757
33813	CP0007	CP0056	0.0832434	-0.176305	Janamba Donalds Lagoon Station	WHNT Tiwi Islands	Janamba Donalds Lagoon Station_WHNT Tiwi Islands	0.738403	0	140.757
33790	CP0007	CP0078	0.0839035	-0.175318	Janamba Donalds Lagoon Station	WHNT Tiwi Islands	Janamba Donalds Lagoon Station_WHNT Tiwi Islands	0.739557	0	140.757
30531	CP0001	CP0056	0.079288	-0.174658	Janamba Donalds Lagoon Station	WHNT Tiwi Islands	Janamba Donalds Lagoon Station_WHNT Tiwi Islands	0.742808	0	140.757
30650	CP0001	CP0265	0.074973	-0.173536	Janamba Donalds Lagoon Station	WHNT Tiwi Islands	Janamba Donalds Lagoon Station_WHNT Tiwi Islands	0.740022	0	140.757
30556	CP0001	CP0185	0.0746269	-0.171785	Janamba Donalds Lagoon Station	WHNT Tiwi Islands	Janamba Donalds Lagoon Station_WHNT Tiwi Islands	0.740245	0	140.757
33932	CP0007	CP0265	0.0805466	-0.170551	Janamba Donalds Lagoon Station	WHNT Tiwi Islands	Janamba Donalds Lagoon Station_WHNT Tiwi Islands	0.739123	0	140.757
30662	CP0001	CP0266	0.0767291	-0.169139	Janamba Donalds Lagoon Station	WHNT Tiwi Islands	Janamba Donalds Lagoon Station_WHNT Tiwi Islands	0.743606	0	140.757
33802	CP0007	CP0167	0.0803668	-0.168666	Janamba Donalds Lagoon Station	WHNT Tiwi Islands	Janamba Donalds Lagoon Station_WHNT Tiwi Islands	0.739662	0	140.757
30627	CP0001	CP0261	0.0768815	-0.165523	Janamba Donalds Lagoon Station	WHNT Tiwi Islands	Janamba Donalds Lagoon Station_WHNT Tiwi Islands	0.744959	0	140.757
33880	CP0007	CP0021	0.0805986	-0.164432	Janamba Donalds Lagoon Station	WHNT Tiwi Islands	Janamba Donalds Lagoon Station_WHNT Tiwi Islands	0.741075	0	140.757
30544	CP0001	CP0178	0.0789995	-0.164198	Janamba Donalds Lagoon Station	WHNT Tiwi Islands	Janamba Donalds Lagoon Station_WHNT Tiwi Islands	0.748155	0	140.757
30658	CP0001	CP0249	0.0777717	-0.163949	Janamba Donalds Lagoon Station	WHNT Tiwi Islands	Janamba Donalds Lagoon Station_WHNT Tiwi Islands	0.746337	0	140.757
30566	CP0001	CP0048	0.0758695	-0.163587	Janamba Donalds Lagoon Station	WHNT Tiwi Islands	Janamba Donalds Lagoon Station_WHNT Tiwi Islands	0.74581	0	140.757
30646	CP0001	CP0248	0.0786476	-0.16358	Janamba Donalds Lagoon Station	WHNT Tiwi Islands	Janamba Donalds Lagoon Station_WHNT Tiwi Islands	0.748237	0	140.757
30568	CP0001	CP0188	0.0720981	-0.154891	Janamba Donalds Lagoon Station	WHNT Tiwi Islands	Janamba Donalds Lagoon Station_WHNT Tiwi Islands	0.746305	0	140.757
30579	CP0001	CP0069	0.0755803	-0.154555	Janamba Donalds Lagoon Station	WHNT Tiwi Islands	Janamba Donalds Lagoon Station_WHNT Tiwi Islands	0.749775	0	140.757
33909	CP0007	CP0261	0.0763414	-0.153738	Janamba Donalds Lagoon Station	WHNT Tiwi Islands	Janamba Donalds Lagoon Station_WHNT Tiwi Islands	0.742528	0	140.757
33952	CP0007	CP0254	0.0755668	-0.15367	Janamba Donalds Lagoon Station	WHNT Tiwi Islands	Janamba Donalds Lagoon Station_WHNT Tiwi Islands	0.742263	0	140.757
30603	CP0001	CP0258	0.0724324	-0.152245	Janamba Donalds Lagoon Station	WHNT Tiwi Islands	Janamba Donalds Lagoon Station_WHNT Tiwi Islands	0.747838	0	140.757
30555	CP0001	CP0067	0.0715444	-0.151779	Janamba Donalds Lagoon Station	WHNT Tiwi Islands	Janamba Donalds Lagoon Station_WHNT Tiwi Islands	0.748063	0	140.757
30611	CP0001	CP0192	0.0742754	-0.151163	Janamba Donalds Lagoon Station	WHNT Tiwi Islands	Janamba Donalds Lagoon Station_WHNT Tiwi Islands	0.749638	0	140.757
30578	CP0001	CP0049	0.0707089	-0.148805	Janamba Donalds Lagoon Station	WHNT Tiwi Islands	Janamba Donalds Lagoon Station_WHNT Tiwi Islands	0.748291	0	140.757
30590	CP0001	CP0073	0.0742806	-0.146284	Janamba Donalds Lagoon Station	WHNT Tiwi Islands	Janamba Donalds Lagoon Station_WHNT Tiwi Islands	0.752068	0	140.757
30634	CP0001	CP0195	0.0729242	-0.145577	Janamba Donalds Lagoon Station	WHNT Tiwi Islands	Janamba Donalds Lagoon Station_WHNT Tiwi Islands	0.751534	0	140.757
30507	CP0001	CP0052	0.0705544	-0.144946	Janamba Donalds Lagoon Station	WHNT Tiwi Islands	Janamba Donalds Lagoon Station_WHNT Tiwi Islands	0.74901	0	140.757
33893	CP0007	CP0192	0.0773551	-0.144026	Janamba Donalds Lagoon Station	WHNT Tiwi Islands	Janamba Donalds Lagoon Station_WHNT Tiwi Islands	0.749275	0	140.757
33838	CP0007	CP0185	0.071557	-0.143486	Janamba Donalds Lagoon Station	WHNT Tiwi Islands	Janamba Donalds Lagoon Station_WHNT Tiwi Islands	0.742988	0	140.757
30673	CP0001	CP0279	0.071866	-0.143064	Janamba Donalds Lagoon Station	WHNT Tiwi Islands	Janamba Donalds Lagoon Station_WHNT Tiwi Islands	0.751261	0	140.757
33837	CP0007	CP0067	0.0751487	-0.141868	Janamba Donalds Lagoon Station	WHNT Tiwi Islands	Janamba Donalds Lagoon Station_WHNT Tiwi Islands	0.749414	0	140.757
30604	CP0001	CP0287	0.0750767	-0.141044	Janamba Donalds Lagoon Station	WHNT Tiwi Islands	Janamba Donalds Lagoon Station_WHNT Tiwi Islands	0.756001	0	140.757
33916	CP0007	CP0195	0.0743682	-0.136074	Janamba Donalds Lagoon Station	WHNT Tiwi Islands	Janamba Donalds Lagoon Station_WHNT Tiwi Islands	0.750361	0	140.757
30506	CP0001	CP0022	0.0688412	-0.135688	Janamba Donalds Lagoon Station	WHNT Tiwi Islands	Janamba Donalds Lagoon Station_WHNT Tiwi Islands	0.752658	0	140.757
30530	CP0001	CP0038	0.069964	-0.135658	Janamba Donalds Lagoon Station	WHNT Tiwi Islands	Janamba Donalds Lagoon Station_WHNT Tiwi Islands	0.753507	0	140.757
30554	CP0001	CP0041	0.0681287	-0.134935	Janamba Donalds Lagoon Station	WHNT Tiwi Islands	Janamba Donalds Lagoon Station_WHNT Tiwi Islands	0.752202	0	140.757
33928	CP0007	CP0248	0.0762972	-0.13467	Janamba Donalds Lagoon Station	WHNT Tiwi Islands	Janamba Donalds Lagoon Station_WHNT Tiwi Islands	0.752938	0	140.757
30638	CP0001	CP0264	0.0723152	-0.133117	Janamba Donalds Lagoon Station	WHNT Tiwi Islands	Janamba Donalds Lagoon Station_WHNT Tiwi Islands	0.756611	0	140.757
33860	CP0007	CP0049	0.0764664	-0.132155	Janamba Donalds Lagoon Station	WHNT Tiwi Islands	Janamba Donalds Lagoon Station_WHNT Tiwi Islands	0.754588	0	140.757
30589	CP0001	CP0050	0.0710038	-0.132045	Janamba Donalds Lagoon Station	WHNT Tiwi Islands	Janamba Donalds Lagoon Station_WHNT Tiwi Islands	0.755722	0	140.757
30567	CP0001	CP0068	0.0692945	-0.131693	Janamba Donalds Lagoon Station	WHNT Tiwi Islands	Janamba Donalds Lagoon Station_WHNT Tiwi Islands	0.75504	0	140.757
33850	CP0007	CP0188	0.0726257	-0.131365	Janamba Donalds Lagoon Station	WHNT Tiwi Islands	Janamba Donalds Lagoon Station_WHNT Tiwi Islands	0.750856	0	140.757
30615	CP0001	CP0260	0.0700522	-0.130624	Janamba Donalds Lagoon Station	WHNT Tiwi Islands	Janamba Donalds Lagoon Station_WHNT Tiwi Islands	0.757068	0	140.757
33871	CP0007	CP0050	0.0728059	-0.130473	Janamba Donalds Lagoon Station	WHNT Tiwi Islands	Janamba Donalds Lagoon Station_WHNT Tiwi Islands	0.751036	0	140.757
33800	CP0007	CP0024	0.0722392	-0.129774	Janamba Donalds Lagoon Station	WHNT Tiwi Islands	Janamba Donalds Lagoon Station_WHNT Tiwi Islands	0.751396	0	140.757
33872	CP0007	CP0073	0.0755396	-0.129493	Janamba Donalds Lagoon Station	WHNT Tiwi Islands	Janamba Donalds Lagoon Station_WHNT Tiwi Islands	0.754227	0	140.757
30684	CP0001	CP0282	0.0655945	-0.129254	Janamba Donalds Lagoon Station	WHNT Tiwi Islands	Janamba Donalds Lagoon Station_WHNT Tiwi Islands	0.751536	0	140.757
33940	CP0007	CP0249	0.0723458	-0.12801	Janamba Donalds Lagoon Station	WHNT Tiwi Islands	Janamba Donalds Lagoon Station_WHNT Tiwi Islands	0.751583	0	140.757
33789	CP0007	CP0052	0.0709016	-0.127558	Janamba Donalds Lagoon Station	WHNT Tiwi Islands	Janamba Donalds Lagoon Station_WHNT Tiwi Islands	0.750855	0	140.757
33944	CP0007	CP0266	0.0722262	-0.126942	Janamba Donalds Lagoon Station	WHNT Tiwi Islands	Janamba Donalds Lagoon Station_WHNT Tiwi Islands	0.752432	0	140.757
33812	CP0007	CP0038	0.0676259	-0.126676	Janamba Donalds Lagoon Station	WHNT Tiwi Islands	Janamba Donalds Lagoon Station_WHNT Tiwi Islands	0.748201	0	140.757
30518	CP0001	CP0024	0.0689966	-0.125634	Janamba Donalds Lagoon Station	WHNT Tiwi Islands	Janamba Donalds Lagoon Station_WHNT Tiwi Islands	0.757701	0	140.757
33897	CP0007	CP0260	0.0693319	-0.125177	Janamba Donalds Lagoon Station	WHNT Tiwi Islands	Janamba Donalds Lagoon Station_WHNT Tiwi Islands	0.750945	0	140.757
33848	CP0007	CP0048	0.0717246	-0.124382	Janamba Donalds Lagoon Station	WHNT Tiwi Islands	Janamba Donalds Lagoon Station_WHNT Tiwi Islands	0.752838	0	140.757
33826	CP0007	CP0178	0.0709016	-0.124294	Janamba Donalds Lagoon Station	WHNT Tiwi Islands	Janamba Donalds Lagoon Station_WHNT Tiwi Islands	0.752744	0	140.757
33861	CP0007	CP0069	0.0707216	-0.122705	Janamba Donalds Lagoon Station	WHNT Tiwi Islands	Janamba Donalds Lagoon Station_WHNT Tiwi Islands	0.753374	0	140.757
30599	CP0001	CP0189	0.0667867	-0.122648	Janamba Donalds Lagoon Station	WHNT Tiwi Islands	Janamba Donalds Lagoon Station_WHNT Tiwi Islands	0.756976	0	140.757
30532	CP0001	CP0169	0.0658488	-0.120658	Janamba Donalds Lagoon Station	WHNT Tiwi Islands	Janamba Donalds Lagoon Station_WHNT Tiwi Islands	0.756359	0	140.757
33920	CP0007	CP0264	0.0737543	-0.120507	Janamba Donalds Lagoon Station	WHNT Tiwi Islands	Janamba Donalds Lagoon Station_WHNT Tiwi Islands	0.756971	0	140.757
30543	CP0001	CP0064	0.0643653	-0.120217	Janamba Donalds Lagoon Station	WHNT Tiwi Islands	Janamba Donalds Lagoon Station_WHNT Tiwi Islands	0.755484	0	140.757
33849	CP0007	CP0068	0.0725342	-0.118644	Janamba Donalds Lagoon Station	WHNT Tiwi Islands	Janamba Donalds Lagoon Station_WHNT Tiwi Islands	0.757199	0	140.757
33955	CP0007	CP0279	0.0691643	-0.115303	Janamba Donalds Lagoon Station	WHNT Tiwi Islands	Janamba Donalds Lagoon Station_WHNT Tiwi Islands	0.754863	0	140.757
33788	CP0007	CP0022	0.0697423	-0.114281	Janamba Donalds Lagoon Station	WHNT Tiwi Islands	Janamba Donalds Lagoon Station_WHNT Tiwi Islands	0.757344	0	140.757
33886	CP0007	CP0287	0.0709258	-0.113877	Janamba Donalds Lagoon Station	WHNT Tiwi Islands	Janamba Donalds Lagoon Station_WHNT Tiwi Islands	0.757174	0	140.757
33814	CP0007	CP0169	0.069457	-0.109894	Janamba Donalds Lagoon Station	WHNT Tiwi Islands	Janamba Donalds Lagoon Station_WHNT Tiwi Islands	0.758073	0	140.757
33885	CP0007	CP0258	0.0684685	-0.108711	Janamba Donalds Lagoon Station	WHNT Tiwi Islands	Janamba Donalds Lagoon Station_WHNT Tiwi Islands	0.758739	0	140.757
30623	CP0001	CP0194	0.0659222	-0.108225	Janamba Donalds Lagoon Station	WHNT Tiwi Islands	Janamba Donalds Lagoon Station_WHNT Tiwi Islands	0.762248	0	140.757
33825	CP0007	CP0064	0.0695793	-0.105708	Janamba Donalds Lagoon Station	WHNT Tiwi Islands	Janamba Donalds Lagoon Station_WHNT Tiwi Islands	0.760518	0	140.757
33881	CP0007	CP0189	0.0664266	-0.10477	Janamba Donalds Lagoon Station	WHNT Tiwi Islands	Janamba Donalds Lagoon Station_WHNT Tiwi Islands	0.758326	0	140.757
33836	CP0007	CP0041	0.064893	-0.104549	Janamba Donalds Lagoon Station	WHNT Tiwi Islands	Janamba Donalds Lagoon Station_WHNT Tiwi Islands	0.756696	0	140.757
30542	CP0001	CP0039	0.0666067	-0.1021	Janamba Donalds Lagoon Station	WHNT Tiwi Islands	Janamba Donalds Lagoon Station_WHNT Tiwi Islands	0.767237	0	140.757
33824	CP0007	CP0039	0.0687669	-0.096426	Janamba Donalds Lagoon Station	WHNT Tiwi Islands	Janamba Donalds Lagoon Station_WHNT Tiwi Islands	0.765347	0	140.757
33905	CP0007	CP0194	0.0646614	-0.0957597	Janamba Donalds Lagoon Station	WHNT Tiwi Islands	Janamba Donalds Lagoon Station_WHNT Tiwi Islands	0.760987	0	140.757
33966	CP0007	CP0282	0.0572823	-0.0703402	Janamba Donalds Lagoon Station	WHNT Tiwi Islands	Janamba Donalds Lagoon Station_WHNT Tiwi Islands	0.766444	0	140.757
30548	CP0001	CP0032	0.074533	-0.148629	Janamba Donalds Lagoon Station	WHNT Wagait Finniss River	Janamba Donalds Lagoon Station_WHNT Wagait Finniss River	0.751616	0	89.9359
33830	CP0007	CP0032	0.0718391	-0.131078	Janamba Donalds Lagoon Station	WHNT Wagait Finniss River	Janamba Donalds Lagoon Station_WHNT Wagait Finniss River	0.75018	0	89.9359
30549	CP0001	CP0074	0.0715184	-0.128339	Janamba Donalds Lagoon Station	WHNT Wagait Finniss River	Janamba Donalds Lagoon Station_WHNT Wagait Finniss River	0.75876	0	89.9359
33831	CP0007	CP0074	0.0716981	-0.125	Janamba Donalds Lagoon Station	WHNT Wagait Finniss River	Janamba Donalds Lagoon Station_WHNT Wagait Finniss River	0.754537	0	89.9359
30561	CP0001	CP0164	0.0628705	-0.108327	Janamba Donalds Lagoon Station	WHNT Wagait Finniss River	Janamba Donalds Lagoon Station_WHNT Wagait Finniss River	0.759745	0	89.9359
33843	CP0007	CP0164	0.0628705	-0.0947183	Janamba Donalds Lagoon Station	WHNT Wagait Finniss River	Janamba Donalds Lagoon Station_WHNT Wagait Finniss River	0.759475	0	89.9359
33806	CP0007	CP0029	0.0905172	-0.215821	Janamba Donalds Lagoon Station	WHNT Welltree Station	Janamba Donalds Lagoon Station_WHNT Welltree Station	0.725665	0	92.8101
30524	CP0001	CP0029	0.0876437	-0.213718	Janamba Donalds Lagoon Station	WHNT Welltree Station	Janamba Donalds Lagoon Station_WHNT Welltree Station	0.732579	0	92.8101
33765	CP0007	CP0202	0.0974645	-0.419278	Janamba Donalds Lagoon Station	WMI Djukbinj National Park	Janamba Donalds Lagoon Station_WMI Djukbinj National Park	0.749326	0	37.2436
30483	CP0001	CP0202	0.0935084	-0.396011	Janamba Donalds Lagoon Station	WMI Djukbinj National Park	Janamba Donalds Lagoon Station_WMI Djukbinj National Park	0.754181	0	37.2436
33753	CP0007	CP0201	0.0906475	-0.333478	Janamba Donalds Lagoon Station	WMI Djukbinj National Park	Janamba Donalds Lagoon Station_WMI Djukbinj National Park	0.744964	0	37.2436
30471	CP0001	CP0201	0.0897643	-0.31033	Janamba Donalds Lagoon Station	WMI Djukbinj National Park	Janamba Donalds Lagoon Station_WMI Djukbinj National Park	0.753913	0	37.2436
30459	CP0001	CP0200	0.0805611	-0.211645	Janamba Donalds Lagoon Station	WMI Djukbinj National Park	Janamba Donalds Lagoon Station_WMI Djukbinj National Park	0.758587	0	37.2436
33741	CP0007	CP0200	0.0803812	-0.211279	Janamba Donalds Lagoon Station	WMI Djukbinj National Park	Janamba Donalds Lagoon Station_WMI Djukbinj National Park	0.758317	0	37.2436
30416	CP0001	CP0399	0.0763002	-0.164621	Janamba Donalds Lagoon Station	WMI Djukbinj National Park	Janamba Donalds Lagoon Station_WMI Djukbinj National Park	0.745006	0	37.2436
30486	CP0001	CP0397	0.0720057	-0.155664	Janamba Donalds Lagoon Station	WMI Djukbinj National Park	Janamba Donalds Lagoon Station_WMI Djukbinj National Park	0.745646	0	37.2436
33729	CP0007	CP0199	0.0763702	-0.153946	Janamba Donalds Lagoon Station	WMI Djukbinj National Park	Janamba Donalds Lagoon Station_WMI Djukbinj National Park	0.760737	0	37.2436
30494	CP0001	CP0203	0.0724169	-0.147653	Janamba Donalds Lagoon Station	WMI Djukbinj National Park	Janamba Donalds Lagoon Station_WMI Djukbinj National Park	0.750045	0	37.2436
30447	CP0001	CP0199	0.073688	-0.138496	Janamba Donalds Lagoon Station	WMI Djukbinj National Park	Janamba Donalds Lagoon Station_WMI Djukbinj National Park	0.765457	0	37.2436
33768	CP0007	CP0397	0.0655414	-0.112324	Janamba Donalds Lagoon Station	WMI Djukbinj National Park	Janamba Donalds Lagoon Station_WMI Djukbinj National Park	0.753277	0	37.2436
33776	CP0007	CP0203	0.0666667	-0.111346	Janamba Donalds Lagoon Station	WMI Djukbinj National Park	Janamba Donalds Lagoon Station_WMI Djukbinj National Park	0.754897	0	37.2436
30415	CP0001	CP0204	0.0542288	-0.103641	Janamba Donalds Lagoon Station	WMI Djukbinj National Park	Janamba Donalds Lagoon Station_WMI Djukbinj National Park	0.753546	0	37.2436
30463	CP0001	CP0208	0.0610632	-0.103535	Janamba Donalds Lagoon Station	WMI Djukbinj National Park	Janamba Donalds Lagoon Station_WMI Djukbinj National Park	0.760596	0	37.2436
30451	CP0001	CP0207	0.0546173	-0.0744412	Janamba Donalds Lagoon Station	WMI Djukbinj National Park	Janamba Donalds Lagoon Station_WMI Djukbinj National Park	0.768326	0	37.2436
33745	CP0007	CP0208	0.0569325	-0.0627202	Janamba Donalds Lagoon Station	WMI Djukbinj National Park	Janamba Donalds Lagoon Station_WMI Djukbinj National Park	0.770115	0	37.2436
33733	CP0007	CP0207	0.0574919	-0.062103	Janamba Donalds Lagoon Station	WMI Djukbinj National Park	Janamba Donalds Lagoon Station_WMI Djukbinj National Park	0.77129	0	37.2436
30427	CP0001	CP0205	0.0644524	-0.121846	Janamba Donalds Lagoon Station	WMI Harrison Dam	Janamba Donalds Lagoon Station_WMI Harrison Dam	0.754758	0	21.0984
33710	CP0007	CP0400	0.0630501	-0.0985915	Janamba Donalds Lagoon Station	WMI Harrison Dam	Janamba Donalds Lagoon Station_WMI Harrison Dam	0.757679	0	21.0984
33709	CP0007	CP0205	0.0610413	-0.0869718	Janamba Donalds Lagoon Station	WMI Harrison Dam	Janamba Donalds Lagoon Station_WMI Harrison Dam	0.761759	0	21.0984
30428	CP0001	CP0400	0.0590983	-0.0836337	Janamba Donalds Lagoon Station	WMI Harrison Dam	Janamba Donalds Lagoon Station_WMI Harrison Dam	0.768277	0	21.0984
30440	CP0001	CP0401	0.060018	-0.0922383	Janamba Donalds Lagoon Station	WMI Koolpinyah Station	Janamba Donalds Lagoon Station_WMI Koolpinyah Station	0.765229	0	38.5341
33722	CP0007	CP0401	0.062354	-0.0887949	Janamba Donalds Lagoon Station	WMI Koolpinyah Station	Janamba Donalds Lagoon Station_WMI Koolpinyah Station	0.762084	0	38.5341
54321	CP0239	CP0240	0.102045	-0.323255	Janamba Muk Muk Mugalimba	Janamba Swim Creek Station	Janamba Muk Muk Mugalimba_Janamba Swim Creek Station	0.735028	0	178.16
58093	CP0220	CP0240	0.0965181	-0.305511	Janamba Muk Muk Mugalimba	Janamba Swim Creek Station	Janamba Muk Muk Mugalimba_Janamba Swim Creek Station	0.737868	0	178.16
62935	CP0236	CP0240	0.0931711	-0.30542	Janamba Muk Muk Mugalimba	Janamba Swim Creek Station	Janamba Muk Muk Mugalimba_Janamba Swim Creek Station	0.734199	0	178.16
61465	CP0233	CP0240	0.0901388	-0.299757	Janamba Muk Muk Mugalimba	Janamba Swim Creek Station	Janamba Muk Muk Mugalimba_Janamba Swim Creek Station	0.73373	0	178.16
59851	CP0225	CP0240	0.0953757	-0.297851	Janamba Muk Muk Mugalimba	Janamba Swim Creek Station	Janamba Muk Muk Mugalimba_Janamba Swim Creek Station	0.739975	0	178.16
65256	CP0238	CP0240	0.0897297	-0.293117	Janamba Muk Muk Mugalimba	Janamba Swim Creek Station	Janamba Muk Muk Mugalimba_Janamba Swim Creek Station	0.736757	0	178.16
64156	CP0237	CP0240	0.0849853	-0.285422	Janamba Muk Muk Mugalimba	Janamba Swim Creek Station	Janamba Muk Muk Mugalimba_Janamba Swim Creek Station	0.73293	0	178.16
54286	CP0239	CP0226	0.09367	-0.224225	Janamba Muk Muk Mugalimba	Janamba Swim Creek Station	Janamba Muk Muk Mugalimba_Janamba Swim Creek Station	0.726125	0	178.16
58058	CP0220	CP0226	0.0840934	-0.219652	Janamba Muk Muk Mugalimba	Janamba Swim Creek Station	Janamba Muk Muk Mugalimba_Janamba Swim Creek Station	0.729387	0	178.16
62900	CP0236	CP0226	0.0874036	-0.177531	Janamba Muk Muk Mugalimba	Janamba Swim Creek Station	Janamba Muk Muk Mugalimba_Janamba Swim Creek Station	0.728608	0	178.16
54343	CP0239	CP0009	0.0855693	-0.17229	Janamba Muk Muk Mugalimba	Janamba Swim Creek Station	Janamba Muk Muk Mugalimba_Janamba Swim Creek Station	0.746012	0	178.16
58115	CP0220	CP0009	0.0824295	-0.171554	Janamba Muk Muk Mugalimba	Janamba Swim Creek Station	Janamba Muk Muk Mugalimba_Janamba Swim Creek Station	0.751265	0	178.16
58034	CP0220	CP0010	0.0781193	-0.160073	Janamba Muk Muk Mugalimba	Janamba Swim Creek Station	Janamba Muk Muk Mugalimba_Janamba Swim Creek Station	0.75226	0	178.16
54262	CP0239	CP0010	0.0817918	-0.158441	Janamba Muk Muk Mugalimba	Janamba Swim Creek Station	Janamba Muk Muk Mugalimba_Janamba Swim Creek Station	0.747914	0	178.16
59873	CP0225	CP0009	0.0819613	-0.147352	Janamba Muk Muk Mugalimba	Janamba Swim Creek Station	Janamba Muk Muk Mugalimba_Janamba Swim Creek Station	0.741361	0	178.16
58104	CP0220	CP0006	0.0704607	-0.142857	Janamba Muk Muk Mugalimba	Janamba Swim Creek Station	Janamba Muk Muk Mugalimba_Janamba Swim Creek Station	0.753388	0	178.16
59816	CP0225	CP0226	0.0874886	-0.14223	Janamba Muk Muk Mugalimba	Janamba Swim Creek Station	Janamba Muk Muk Mugalimba_Janamba Swim Creek Station	0.726667	0	178.16
58069	CP0220	CP0227	0.0701533	-0.140716	Janamba Muk Muk Mugalimba	Janamba Swim Creek Station	Janamba Muk Muk Mugalimba_Janamba Swim Creek Station	0.754013	0	178.16
58092	CP0220	CP0005	0.0683869	-0.138259	Janamba Muk Muk Mugalimba	Janamba Swim Creek Station	Janamba Muk Muk Mugalimba_Janamba Swim Creek Station	0.753519	0	178.16
58046	CP0220	CP0224	0.0713769	-0.13653	Janamba Muk Muk Mugalimba	Janamba Swim Creek Station	Janamba Muk Muk Mugalimba_Janamba Swim Creek Station	0.757138	0	178.16
54297	CP0239	CP0227	0.0741679	-0.125179	Janamba Muk Muk Mugalimba	Janamba Swim Creek Station	Janamba Muk Muk Mugalimba_Janamba Swim Creek Station	0.757959	0	178.16
61430	CP0233	CP0226	0.0854903	-0.12348	Janamba Muk Muk Mugalimba	Janamba Swim Creek Station	Janamba Muk Muk Mugalimba_Janamba Swim Creek Station	0.730222	0	178.16
58081	CP0220	CP0228	0.0665945	-0.122076	Janamba Muk Muk Mugalimba	Janamba Swim Creek Station	Janamba Muk Muk Mugalimba_Janamba Swim Creek Station	0.75943	0	178.16
54332	CP0239	CP0006	0.0710274	-0.121326	Janamba Muk Muk Mugalimba	Janamba Swim Creek Station	Janamba Muk Muk Mugalimba_Janamba Swim Creek Station	0.756931	0	178.16
65221	CP0238	CP0226	0.0803425	-0.119238	Janamba Muk Muk Mugalimba	Janamba Swim Creek Station	Janamba Muk Muk Mugalimba_Janamba Swim Creek Station	0.72791	0	178.16
64178	CP0237	CP0009	0.0737268	-0.11691	Janamba Muk Muk Mugalimba	Janamba Swim Creek Station	Janamba Muk Muk Mugalimba_Janamba Swim Creek Station	0.747748	0	178.16
54309	CP0239	CP0228	0.0660753	-0.116404	Janamba Muk Muk Mugalimba	Janamba Swim Creek Station	Janamba Muk Muk Mugalimba_Janamba Swim Creek Station	0.754526	0	178.16
62957	CP0236	CP0009	0.0776929	-0.115345	Janamba Muk Muk Mugalimba	Janamba Swim Creek Station	Janamba Muk Muk Mugalimba_Janamba Swim Creek Station	0.753002	0	178.16
59792	CP0225	CP0010	0.0765888	-0.110596	Janamba Muk Muk Mugalimba	Janamba Swim Creek Station	Janamba Muk Muk Mugalimba_Janamba Swim Creek Station	0.742712	0	178.16
54274	CP0239	CP0224	0.0728657	-0.109543	Janamba Muk Muk Mugalimba	Janamba Swim Creek Station	Janamba Muk Muk Mugalimba_Janamba Swim Creek Station	0.76373	0	178.16
54320	CP0239	CP0005	0.0667873	-0.106017	Janamba Muk Muk Mugalimba	Janamba Swim Creek Station	Janamba Muk Muk Mugalimba_Janamba Swim Creek Station	0.760543	0	178.16
61487	CP0233	CP0009	0.0733382	-0.100206	Janamba Muk Muk Mugalimba	Janamba Swim Creek Station	Janamba Muk Muk Mugalimba_Janamba Swim Creek Station	0.757406	0	178.16
64121	CP0237	CP0226	0.0763089	-0.0971223	Janamba Muk Muk Mugalimba	Janamba Swim Creek Station	Janamba Muk Muk Mugalimba_Janamba Swim Creek Station	0.737282	0	178.16
65209	CP0238	CP0224	0.0658845	-0.0877193	Janamba Muk Muk Mugalimba	Janamba Swim Creek Station	Janamba Muk Muk Mugalimba_Janamba Swim Creek Station	0.763538	0	178.16
65278	CP0238	CP0009	0.0642715	-0.0832189	Janamba Muk Muk Mugalimba	Janamba Swim Creek Station	Janamba Muk Muk Mugalimba_Janamba Swim Creek Station	0.757447	0	178.16
64109	CP0237	CP0224	0.0623391	-0.0805417	Janamba Muk Muk Mugalimba	Janamba Swim Creek Station	Janamba Muk Muk Mugalimba_Janamba Swim Creek Station	0.76278	0	178.16
62888	CP0236	CP0224	0.0629549	-0.0798023	Janamba Muk Muk Mugalimba	Janamba Swim Creek Station	Janamba Muk Muk Mugalimba_Janamba Swim Creek Station	0.764192	0	178.16
62876	CP0236	CP0010	0.0684508	-0.079428	Janamba Muk Muk Mugalimba	Janamba Swim Creek Station	Janamba Muk Muk Mugalimba_Janamba Swim Creek Station	0.762334	0	178.16
61418	CP0233	CP0224	0.057793	-0.0782456	Janamba Muk Muk Mugalimba	Janamba Swim Creek Station	Janamba Muk Muk Mugalimba_Janamba Swim Creek Station	0.760159	0	178.16
62911	CP0236	CP0227	0.0641002	-0.0761692	Janamba Muk Muk Mugalimba	Janamba Swim Creek Station	Janamba Muk Muk Mugalimba_Janamba Swim Creek Station	0.759851	0	178.16
64097	CP0237	CP0010	0.0702852	-0.0734406	Janamba Muk Muk Mugalimba	Janamba Swim Creek Station	Janamba Muk Muk Mugalimba_Janamba Swim Creek Station	0.755658	0	178.16
65197	CP0238	CP0010	0.067365	-0.0681069	Janamba Muk Muk Mugalimba	Janamba Swim Creek Station	Janamba Muk Muk Mugalimba_Janamba Swim Creek Station	0.756276	0	178.16
62946	CP0236	CP0006	0.0618407	-0.0663336	Janamba Muk Muk Mugalimba	Janamba Swim Creek Station	Janamba Muk Muk Mugalimba_Janamba Swim Creek Station	0.762914	0	178.16
62923	CP0236	CP0228	0.0623296	-0.0660248	Janamba Muk Muk Mugalimba	Janamba Swim Creek Station	Janamba Muk Muk Mugalimba_Janamba Swim Creek Station	0.76322	0	178.16
59839	CP0225	CP0228	0.0663293	-0.0562701	Janamba Muk Muk Mugalimba	Janamba Swim Creek Station	Janamba Muk Muk Mugalimba_Janamba Swim Creek Station	0.75366	0	178.16
62934	CP0236	CP0005	0.0563227	-0.0546392	Janamba Muk Muk Mugalimba	Janamba Swim Creek Station	Janamba Muk Muk Mugalimba_Janamba Swim Creek Station	0.763081	0	178.16
61406	CP0233	CP0010	0.0634261	-0.0523102	Janamba Muk Muk Mugalimba	Janamba Swim Creek Station	Janamba Muk Muk Mugalimba_Janamba Swim Creek Station	0.761023	0	178.16
59827	CP0225	CP0227	0.0652095	-0.0509646	Janamba Muk Muk Mugalimba	Janamba Swim Creek Station	Janamba Muk Muk Mugalimba_Janamba Swim Creek Station	0.75569	0	178.16
65232	CP0238	CP0227	0.0645045	-0.0504148	Janamba Muk Muk Mugalimba	Janamba Swim Creek Station	Janamba Muk Muk Mugalimba_Janamba Swim Creek Station	0.753694	0	178.16
59804	CP0225	CP0224	0.0562794	-0.0425194	Janamba Muk Muk Mugalimba	Janamba Swim Creek Station	Janamba Muk Muk Mugalimba_Janamba Swim Creek Station	0.778049	0	178.16
64144	CP0237	CP0228	0.0652094	-0.042283	Janamba Muk Muk Mugalimba	Janamba Swim Creek Station	Janamba Muk Muk Mugalimba_Janamba Swim Creek Station	0.755419	0	178.16
61453	CP0233	CP0228	0.0615079	-0.0405619	Janamba Muk Muk Mugalimba	Janamba Swim Creek Station	Janamba Muk Muk Mugalimba_Janamba Swim Creek Station	0.752615	0	178.16
61441	CP0233	CP0227	0.0643591	-0.0344388	Janamba Muk Muk Mugalimba	Janamba Swim Creek Station	Janamba Muk Muk Mugalimba_Janamba Swim Creek Station	0.762214	0	178.16
64132	CP0237	CP0227	0.0587479	-0.0319805	Janamba Muk Muk Mugalimba	Janamba Swim Creek Station	Janamba Muk Muk Mugalimba_Janamba Swim Creek Station	0.75794	0	178.16
65244	CP0238	CP0228	0.057148	-0.0184893	Janamba Muk Muk Mugalimba	Janamba Swim Creek Station	Janamba Muk Muk Mugalimba_Janamba Swim Creek Station	0.761403	0	178.16
65267	CP0238	CP0006	0.0561169	-0.0164615	Janamba Muk Muk Mugalimba	Janamba Swim Creek Station	Janamba Muk Muk Mugalimba_Janamba Swim Creek Station	0.753248	0	178.16
65255	CP0238	CP0005	0.0576784	-0.0159509	Janamba Muk Muk Mugalimba	Janamba Swim Creek Station	Janamba Muk Muk Mugalimba_Janamba Swim Creek Station	0.754506	0	178.16
61464	CP0233	CP0005	0.0544635	-0.0122487	Janamba Muk Muk Mugalimba	Janamba Swim Creek Station	Janamba Muk Muk Mugalimba_Janamba Swim Creek Station	0.760325	0	178.16
61476	CP0233	CP0006	0.0554152	-0.00913098	Janamba Muk Muk Mugalimba	Janamba Swim Creek Station	Janamba Muk Muk Mugalimba_Janamba Swim Creek Station	0.763538	0	178.16
64167	CP0237	CP0006	0.0566176	0.0040448	Janamba Muk Muk Mugalimba	Janamba Swim Creek Station	Janamba Muk Muk Mugalimba_Janamba Swim Creek Station	0.763603	0	178.16
59862	CP0225	CP0006	0.0530029	0.00548034	Janamba Muk Muk Mugalimba	Janamba Swim Creek Station	Janamba Muk Muk Mugalimba_Janamba Swim Creek Station	0.775507	0	178.16
64155	CP0237	CP0005	0.0560147	0.00904908	Janamba Muk Muk Mugalimba	Janamba Swim Creek Station	Janamba Muk Muk Mugalimba_Janamba Swim Creek Station	0.762075	0	178.16
59850	CP0225	CP0005	0.0457174	0.0301224	Janamba Muk Muk Mugalimba	Janamba Swim Creek Station	Janamba Muk Muk Mugalimba_Janamba Swim Creek Station	0.782165	0	178.16
54244	CP0239	CP0179	0.0749186	-0.114918	Janamba Muk Muk Mugalimba	WHNT Elizabeth Downs Station	Janamba Muk Muk Mugalimba_WHNT Elizabeth Downs Station	0.76312	0	102.014
58018	CP0220	CP0252	0.0628159	-0.0838816	Janamba Muk Muk Mugalimba	WHNT Elizabeth Downs Station	Janamba Muk Muk Mugalimba_WHNT Elizabeth Downs Station	0.774458	0	102.014
59774	CP0225	CP0179	0.0650407	-0.074684	Janamba Muk Muk Mugalimba	WHNT Elizabeth Downs Station	Janamba Muk Muk Mugalimba_WHNT Elizabeth Downs Station	0.752936	0	102.014
58016	CP0220	CP0179	0.0581018	-0.065924	Janamba Muk Muk Mugalimba	WHNT Elizabeth Downs Station	Janamba Muk Muk Mugalimba_WHNT Elizabeth Downs Station	0.77851	0	102.014
59776	CP0225	CP0252	0.0684981	-0.0607843	Janamba Muk Muk Mugalimba	WHNT Elizabeth Downs Station	Janamba Muk Muk Mugalimba_WHNT Elizabeth Downs Station	0.758359	0	102.014
54246	CP0239	CP0252	0.0537459	-0.0335714	Janamba Muk Muk Mugalimba	WHNT Elizabeth Downs Station	Janamba Muk Muk Mugalimba_WHNT Elizabeth Downs Station	0.783388	0	102.014
62858	CP0236	CP0179	0.0574024	-0.0318307	Janamba Muk Muk Mugalimba	WHNT Elizabeth Downs Station	Janamba Muk Muk Mugalimba_WHNT Elizabeth Downs Station	0.776658	0	102.014
62860	CP0236	CP0252	0.0572311	-0.0287534	Janamba Muk Muk Mugalimba	WHNT Elizabeth Downs Station	Janamba Muk Muk Mugalimba_WHNT Elizabeth Downs Station	0.778252	0	102.014
61388	CP0233	CP0179	0.0546143	-0.0199071	Janamba Muk Muk Mugalimba	WHNT Elizabeth Downs Station	Janamba Muk Muk Mugalimba_WHNT Elizabeth Downs Station	0.77217	0	102.014
61390	CP0233	CP0252	0.0501443	-0.00163399	Janamba Muk Muk Mugalimba	WHNT Elizabeth Downs Station	Janamba Muk Muk Mugalimba_WHNT Elizabeth Downs Station	0.773268	0	102.014
64081	CP0237	CP0252	0.0393021	0.0759431	Janamba Muk Muk Mugalimba	WHNT Elizabeth Downs Station	Janamba Muk Muk Mugalimba_WHNT Elizabeth Downs Station	0.803949	0	102.014
54316	CP0239	CP0034	0.100761	-0.2584	Janamba Muk Muk Mugalimba	WHNT King River Goomadeer River	Janamba Muk Muk Mugalimba_WHNT King River Goomadeer River	0.724447	1	396.139
59846	CP0225	CP0034	0.0935408	-0.247805	Janamba Muk Muk Mugalimba	WHNT King River Goomadeer River	Janamba Muk Muk Mugalimba_WHNT King River Goomadeer River	0.723629	1	396.139
58088	CP0220	CP0034	0.0945067	-0.243777	Janamba Muk Muk Mugalimba	WHNT King River Goomadeer River	Janamba Muk Muk Mugalimba_WHNT King River Goomadeer River	0.727322	1	396.139
61460	CP0233	CP0034	0.0917299	-0.233042	Janamba Muk Muk Mugalimba	WHNT King River Goomadeer River	Janamba Muk Muk Mugalimba_WHNT King River Goomadeer River	0.728783	1	396.139
58091	CP0220	CP0331	0.0888003	-0.206618	Janamba Muk Muk Mugalimba	WHNT King River Goomadeer River	Janamba Muk Muk Mugalimba_WHNT King River Goomadeer River	0.740486	1	396.139
62930	CP0236	CP0034	0.088048	-0.203928	Janamba Muk Muk Mugalimba	WHNT King River Goomadeer River	Janamba Muk Muk Mugalimba_WHNT King River Goomadeer River	0.739221	1	396.139
54319	CP0239	CP0331	0.085787	-0.195481	Janamba Muk Muk Mugalimba	WHNT King River Goomadeer River	Janamba Muk Muk Mugalimba_WHNT King River Goomadeer River	0.73337	1	396.139
54295	CP0239	CP0308	0.0833032	-0.195396	Janamba Muk Muk Mugalimba	WHNT King River Goomadeer River	Janamba Muk Muk Mugalimba_WHNT King River Goomadeer River	0.731207	1	396.139
65251	CP0238	CP0034	0.0776033	-0.189234	Janamba Muk Muk Mugalimba	WHNT King River Goomadeer River	Janamba Muk Muk Mugalimba_WHNT King River Goomadeer River	0.73678	1	396.139
54351	CP0239	CP0263	0.0776874	-0.18375	Janamba Muk Muk Mugalimba	WHNT King River Goomadeer River	Janamba Muk Muk Mugalimba_WHNT King River Goomadeer River	0.731798	1	396.139
58067	CP0220	CP0308	0.0789189	-0.177007	Janamba Muk Muk Mugalimba	WHNT King River Goomadeer River	Janamba Muk Muk Mugalimba_WHNT King River Goomadeer River	0.744685	1	396.139
64151	CP0237	CP0034	0.0781537	-0.176124	Janamba Muk Muk Mugalimba	WHNT King River Goomadeer River	Janamba Muk Muk Mugalimba_WHNT King River Goomadeer River	0.740713	1	396.139
54282	CP0239	CP0170	0.081086	-0.173874	Janamba Muk Muk Mugalimba	WHNT King River Goomadeer River	Janamba Muk Muk Mugalimba_WHNT King River Goomadeer River	0.739819	1	396.139
58056	CP0220	CP0301	0.0790328	-0.171669	Janamba Muk Muk Mugalimba	WHNT King River Goomadeer River	Janamba Muk Muk Mugalimba_WHNT King River Goomadeer River	0.747925	1	396.139
54339	CP0239	CP0057	0.0778963	-0.166786	Janamba Muk Muk Mugalimba	WHNT King River Goomadeer River	Janamba Muk Muk Mugalimba_WHNT King River Goomadeer River	0.741189	1	396.139
58044	CP0220	CP0300	0.0685549	-0.162518	Janamba Muk Muk Mugalimba	WHNT King River Goomadeer River	Janamba Muk Muk Mugalimba_WHNT King River Goomadeer River	0.742017	1	396.139
54284	CP0239	CP0301	0.0787045	-0.162259	Janamba Muk Muk Mugalimba	WHNT King River Goomadeer River	Janamba Muk Muk Mugalimba_WHNT King River Goomadeer River	0.743441	1	396.139
58123	CP0220	CP0263	0.0700775	-0.161184	Janamba Muk Muk Mugalimba	WHNT King River Goomadeer River	Janamba Muk Muk Mugalimba_WHNT King River Goomadeer River	0.74419	1	396.139
62933	CP0236	CP0331	0.0857508	-0.159751	Janamba Muk Muk Mugalimba	WHNT King River Goomadeer River	Janamba Muk Muk Mugalimba_WHNT King River Goomadeer River	0.737639	1	396.139
58111	CP0220	CP0057	0.0756893	-0.155405	Janamba Muk Muk Mugalimba	WHNT King River Goomadeer River	Janamba Muk Muk Mugalimba_WHNT King River Goomadeer River	0.752298	1	396.139
54272	CP0239	CP0300	0.0759906	-0.147857	Janamba Muk Muk Mugalimba	WHNT King River Goomadeer River	Janamba Muk Muk Mugalimba_WHNT King River Goomadeer River	0.747784	1	396.139
62909	CP0236	CP0308	0.0770905	-0.142416	Janamba Muk Muk Mugalimba	WHNT King River Goomadeer River	Janamba Muk Muk Mugalimba_WHNT King River Goomadeer River	0.737529	1	396.139
59849	CP0225	CP0331	0.0851025	-0.14165	Janamba Muk Muk Mugalimba	WHNT King River Goomadeer River	Janamba Muk Muk Mugalimba_WHNT King River Goomadeer River	0.733714	1	396.139
58057	CP0220	CP0360	0.0674402	-0.140739	Janamba Muk Muk Mugalimba	WHNT King River Goomadeer River	Janamba Muk Muk Mugalimba_WHNT King River Goomadeer River	0.750091	1	396.139
62898	CP0236	CP0301	0.0746594	-0.13799	Janamba Muk Muk Mugalimba	WHNT King River Goomadeer River	Janamba Muk Muk Mugalimba_WHNT King River Goomadeer River	0.737875	1	396.139
61463	CP0233	CP0331	0.0825788	-0.135506	Janamba Muk Muk Mugalimba	WHNT King River Goomadeer River	Janamba Muk Muk Mugalimba_WHNT King River Goomadeer River	0.734788	1	396.139
54285	CP0239	CP0360	0.0721818	-0.13529	Janamba Muk Muk Mugalimba	WHNT King River Goomadeer River	Janamba Muk Muk Mugalimba_WHNT King River Goomadeer River	0.749455	1	396.139
58080	CP0220	CP0380	0.065526	-0.130699	Janamba Muk Muk Mugalimba	WHNT King River Goomadeer River	Janamba Muk Muk Mugalimba_WHNT King River Goomadeer River	0.753276	1	396.139
58054	CP0220	CP0170	0.0687602	-0.128838	Janamba Muk Muk Mugalimba	WHNT King River Goomadeer River	Janamba Muk Muk Mugalimba_WHNT King River Goomadeer River	0.758257	1	396.139
54350	CP0239	CP0066	0.0724219	-0.127318	Janamba Muk Muk Mugalimba	WHNT King River Goomadeer River	Janamba Muk Muk Mugalimba_WHNT King River Goomadeer River	0.754741	1	396.139
54308	CP0239	CP0380	0.0715459	-0.126532	Janamba Muk Muk Mugalimba	WHNT King River Goomadeer River	Janamba Muk Muk Mugalimba_WHNT King River Goomadeer River	0.754335	1	396.139
64154	CP0237	CP0331	0.079491	-0.123147	Janamba Muk Muk Mugalimba	WHNT King River Goomadeer River	Janamba Muk Muk Mugalimba_WHNT King River Goomadeer River	0.738381	1	396.139
65254	CP0238	CP0331	0.0698643	-0.116314	Janamba Muk Muk Mugalimba	WHNT King River Goomadeer River	Janamba Muk Muk Mugalimba_WHNT King River Goomadeer River	0.73276	1	396.139
58122	CP0220	CP0066	0.0597875	-0.115693	Janamba Muk Muk Mugalimba	WHNT King River Goomadeer River	Janamba Muk Muk Mugalimba_WHNT King River Goomadeer River	0.755988	1	396.139
62886	CP0236	CP0300	0.0679259	-0.108785	Janamba Muk Muk Mugalimba	WHNT King River Goomadeer River	Janamba Muk Muk Mugalimba_WHNT King River Goomadeer River	0.745732	1	396.139
62953	CP0236	CP0057	0.0722061	-0.103537	Janamba Muk Muk Mugalimba	WHNT King River Goomadeer River	Janamba Muk Muk Mugalimba_WHNT King River Goomadeer River	0.753356	1	396.139
61428	CP0233	CP0301	0.0777137	-0.103117	Janamba Muk Muk Mugalimba	WHNT King River Goomadeer River	Janamba Muk Muk Mugalimba_WHNT King River Goomadeer River	0.73233	1	396.139
62965	CP0236	CP0263	0.0645629	-0.0988332	Janamba Muk Muk Mugalimba	WHNT King River Goomadeer River	Janamba Muk Muk Mugalimba_WHNT King River Goomadeer River	0.748096	1	396.139
62896	CP0236	CP0170	0.0679506	-0.0961406	Janamba Muk Muk Mugalimba	WHNT King River Goomadeer River	Janamba Muk Muk Mugalimba_WHNT King River Goomadeer River	0.753634	1	396.139
59825	CP0225	CP0308	0.0728847	-0.0916399	Janamba Muk Muk Mugalimba	WHNT King River Goomadeer River	Janamba Muk Muk Mugalimba_WHNT King River Goomadeer River	0.740935	1	396.139
62899	CP0236	CP0360	0.0614964	-0.0856945	Janamba Muk Muk Mugalimba	WHNT King River Goomadeer River	Janamba Muk Muk Mugalimba_WHNT King River Goomadeer River	0.75219	1	396.139
62922	CP0236	CP0380	0.0639428	-0.084375	Janamba Muk Muk Mugalimba	WHNT King River Goomadeer River	Janamba Muk Muk Mugalimba_WHNT King River Goomadeer River	0.755588	1	396.139
59881	CP0225	CP0263	0.0651154	-0.0838689	Janamba Muk Muk Mugalimba	WHNT King River Goomadeer River	Janamba Muk Muk Mugalimba_WHNT King River Goomadeer River	0.737374	1	396.139
62964	CP0236	CP0066	0.0605511	-0.0830474	Janamba Muk Muk Mugalimba	WHNT King River Goomadeer River	Janamba Muk Muk Mugalimba_WHNT King River Goomadeer River	0.752538	1	396.139
61426	CP0233	CP0170	0.0678088	-0.0745443	Janamba Muk Muk Mugalimba	WHNT King River Goomadeer River	Janamba Muk Muk Mugalimba_WHNT King River Goomadeer River	0.749504	1	396.139
59814	CP0225	CP0301	0.068654	-0.0709003	Janamba Muk Muk Mugalimba	WHNT King River Goomadeer River	Janamba Muk Muk Mugalimba_WHNT King River Goomadeer River	0.747877	1	396.139
61439	CP0233	CP0308	0.070207	-0.0687814	Janamba Muk Muk Mugalimba	WHNT King River Goomadeer River	Janamba Muk Muk Mugalimba_WHNT King River Goomadeer River	0.744194	1	396.139
59815	CP0225	CP0360	0.068252	-0.0625806	Janamba Muk Muk Mugalimba	WHNT King River Goomadeer River	Janamba Muk Muk Mugalimba_WHNT King River Goomadeer River	0.751679	1	396.139
59880	CP0225	CP0066	0.0679769	-0.0618176	Janamba Muk Muk Mugalimba	WHNT King River Goomadeer River	Janamba Muk Muk Mugalimba_WHNT King River Goomadeer River	0.752524	1	396.139
59838	CP0225	CP0380	0.0670676	-0.0618105	Janamba Muk Muk Mugalimba	WHNT King River Goomadeer River	Janamba Muk Muk Mugalimba_WHNT King River Goomadeer River	0.751504	1	396.139
64130	CP0237	CP0308	0.0722406	-0.0574875	Janamba Muk Muk Mugalimba	WHNT King River Goomadeer River	Janamba Muk Muk Mugalimba_WHNT King River Goomadeer River	0.745966	1	396.139
61483	CP0233	CP0057	0.0644697	-0.0573586	Janamba Muk Muk Mugalimba	WHNT King River Goomadeer River	Janamba Muk Muk Mugalimba_WHNT King River Goomadeer River	0.752116	1	396.139
59812	CP0225	CP0170	0.0632454	-0.0563885	Janamba Muk Muk Mugalimba	WHNT King River Goomadeer River	Janamba Muk Muk Mugalimba_WHNT King River Goomadeer River	0.754789	1	396.139
64117	CP0237	CP0170	0.062259	-0.0545213	Janamba Muk Muk Mugalimba	WHNT King River Goomadeer River	Janamba Muk Muk Mugalimba_WHNT King River Goomadeer River	0.755923	1	396.139
64174	CP0237	CP0057	0.0629012	-0.0511772	Janamba Muk Muk Mugalimba	WHNT King River Goomadeer River	Janamba Muk Muk Mugalimba_WHNT King River Goomadeer River	0.753805	1	396.139
61416	CP0233	CP0300	0.060393	-0.046983	Janamba Muk Muk Mugalimba	WHNT King River Goomadeer River	Janamba Muk Muk Mugalimba_WHNT King River Goomadeer River	0.74662	1	396.139
59802	CP0225	CP0300	0.0590679	-0.046332	Janamba Muk Muk Mugalimba	WHNT King River Goomadeer River	Janamba Muk Muk Mugalimba_WHNT King River Goomadeer River	0.752348	1	396.139
59869	CP0225	CP0057	0.0624323	-0.0458199	Janamba Muk Muk Mugalimba	WHNT King River Goomadeer River	Janamba Muk Muk Mugalimba_WHNT King River Goomadeer River	0.756135	1	396.139
65230	CP0238	CP0308	0.0640633	-0.0432099	Janamba Muk Muk Mugalimba	WHNT King River Goomadeer River	Janamba Muk Muk Mugalimba_WHNT King River Goomadeer River	0.747346	1	396.139
61495	CP0233	CP0263	0.0599352	-0.0409605	Janamba Muk Muk Mugalimba	WHNT King River Goomadeer River	Janamba Muk Muk Mugalimba_WHNT King River Goomadeer River	0.74973	1	396.139
65274	CP0238	CP0057	0.0579554	-0.0401929	Janamba Muk Muk Mugalimba	WHNT King River Goomadeer River	Janamba Muk Muk Mugalimba_WHNT King River Goomadeer River	0.75558	1	396.139
65219	CP0238	CP0301	0.0643359	-0.0370541	Janamba Muk Muk Mugalimba	WHNT King River Goomadeer River	Janamba Muk Muk Mugalimba_WHNT King River Goomadeer River	0.749595	1	396.139
64119	CP0237	CP0301	0.0639001	-0.034098	Janamba Muk Muk Mugalimba	WHNT King River Goomadeer River	Janamba Muk Muk Mugalimba_WHNT King River Goomadeer River	0.747521	1	396.139
65286	CP0238	CP0263	0.0606333	-0.0317485	Janamba Muk Muk Mugalimba	WHNT King River Goomadeer River	Janamba Muk Muk Mugalimba_WHNT King River Goomadeer River	0.748741	1	396.139
65285	CP0238	CP0066	0.0598921	-0.0291232	Janamba Muk Muk Mugalimba	WHNT King River Goomadeer River	Janamba Muk Muk Mugalimba_WHNT King River Goomadeer River	0.74946	1	396.139
65220	CP0238	CP0360	0.0608365	-0.0266482	Janamba Muk Muk Mugalimba	WHNT King River Goomadeer River	Janamba Muk Muk Mugalimba_WHNT King River Goomadeer River	0.751313	1	396.139
61494	CP0233	CP0066	0.0552258	-0.024796	Janamba Muk Muk Mugalimba	WHNT King River Goomadeer River	Janamba Muk Muk Mugalimba_WHNT King River Goomadeer River	0.754452	1	396.139
61429	CP0233	CP0360	0.0565217	-0.0230284	Janamba Muk Muk Mugalimba	WHNT King River Goomadeer River	Janamba Muk Muk Mugalimba_WHNT King River Goomadeer River	0.756159	1	396.139
65217	CP0238	CP0170	0.0524513	-0.0225649	Janamba Muk Muk Mugalimba	WHNT King River Goomadeer River	Janamba Muk Muk Mugalimba_WHNT King River Goomadeer River	0.762347	1	396.139
64186	CP0237	CP0263	0.0603116	-0.0195548	Janamba Muk Muk Mugalimba	WHNT King River Goomadeer River	Janamba Muk Muk Mugalimba_WHNT King River Goomadeer River	0.743721	1	396.139
61452	CP0233	CP0380	0.0545455	-0.0161802	Janamba Muk Muk Mugalimba	WHNT King River Goomadeer River	Janamba Muk Muk Mugalimba_WHNT King River Goomadeer River	0.758727	1	396.139
65243	CP0238	CP0380	0.0552627	-0.00741198	Janamba Muk Muk Mugalimba	WHNT King River Goomadeer River	Janamba Muk Muk Mugalimba_WHNT King River Goomadeer River	0.75659	1	396.139
65207	CP0238	CP0300	0.0526126	-0.00398773	Janamba Muk Muk Mugalimba	WHNT King River Goomadeer River	Janamba Muk Muk Mugalimba_WHNT King River Goomadeer River	0.756577	1	396.139
64120	CP0237	CP0360	0.0577491	0.00467431	Janamba Muk Muk Mugalimba	WHNT King River Goomadeer River	Janamba Muk Muk Mugalimba_WHNT King River Goomadeer River	0.754705	1	396.139
64143	CP0237	CP0380	0.0592702	0.00786925	Janamba Muk Muk Mugalimba	WHNT King River Goomadeer River	Janamba Muk Muk Mugalimba_WHNT King River Goomadeer River	0.758103	1	396.139
64107	CP0237	CP0300	0.0554332	0.00917569	Janamba Muk Muk Mugalimba	WHNT King River Goomadeer River	Janamba Muk Muk Mugalimba_WHNT King River Goomadeer River	0.755965	1	396.139
64185	CP0237	CP0066	0.0546088	0.0177284	Janamba Muk Muk Mugalimba	WHNT King River Goomadeer River	Janamba Muk Muk Mugalimba_WHNT King River Goomadeer River	0.760491	1	396.139
59777	CP0225	CP0272	0.0738595	-0.155172	Janamba Muk Muk Mugalimba	WHNT Labelle Downs Station	Janamba Muk Muk Mugalimba_WHNT Labelle Downs Station	0.750543	0	18.7134
59763	CP0225	CP0176	0.0719827	-0.14608	Janamba Muk Muk Mugalimba	WHNT Labelle Downs Station	Janamba Muk Muk Mugalimba_WHNT Labelle Downs Station	0.75681	0	18.7134
54185	CP0239	CP0053	0.0738667	-0.146053	Janamba Muk Muk Mugalimba	WHNT Labelle Downs Station	Janamba Muk Muk Mugalimba_WHNT Labelle Downs Station	0.7635	0	18.7134
54247	CP0239	CP0272	0.071066	-0.111905	Janamba Muk Muk Mugalimba	WHNT Labelle Downs Station	Janamba Muk Muk Mugalimba_WHNT Labelle Downs Station	0.76822	0	18.7134
54188	CP0239	CP0259	0.0691278	-0.111409	Janamba Muk Muk Mugalimba	WHNT Labelle Downs Station	Janamba Muk Muk Mugalimba_WHNT Labelle Downs Station	0.759772	0	18.7134
58005	CP0220	CP0176	0.0702576	-0.10229	Janamba Muk Muk Mugalimba	WHNT Labelle Downs Station	Janamba Muk Muk Mugalimba_WHNT Labelle Downs Station	0.776437	0	18.7134
54176	CP0239	CP0257	0.0643878	-0.095646	Janamba Muk Muk Mugalimba	WHNT Labelle Downs Station	Janamba Muk Muk Mugalimba_WHNT Labelle Downs Station	0.762525	0	18.7134
59742	CP0225	CP0268	0.0735188	-0.0938729	Janamba Muk Muk Mugalimba	WHNT Labelle Downs Station	Janamba Muk Muk Mugalimba_WHNT Labelle Downs Station	0.746116	0	18.7134
61391	CP0233	CP0272	0.0560275	-0.0880952	Janamba Muk Muk Mugalimba	WHNT Labelle Downs Station	Janamba Muk Muk Mugalimba_WHNT Labelle Downs Station	0.765859	0	18.7134
54257	CP0239	CP0255	0.0620084	-0.0875991	Janamba Muk Muk Mugalimba	WHNT Labelle Downs Station	Janamba Muk Muk Mugalimba_WHNT Labelle Downs Station	0.763856	0	18.7134
62861	CP0236	CP0272	0.0640466	-0.087124	Janamba Muk Muk Mugalimba	WHNT Labelle Downs Station	Janamba Muk Muk Mugalimba_WHNT Labelle Downs Station	0.772835	0	18.7134
54223	CP0239	CP0250	0.0651348	-0.0829757	Janamba Muk Muk Mugalimba	WHNT Labelle Downs Station	Janamba Muk Muk Mugalimba_WHNT Labelle Downs Station	0.770219	0	18.7134
57972	CP0220	CP0262	0.0620939	-0.0826613	Janamba Muk Muk Mugalimba	WHNT Labelle Downs Station	Janamba Muk Muk Mugalimba_WHNT Labelle Downs Station	0.775181	0	18.7134
57984	CP0220	CP0268	0.056648	-0.0777249	Janamba Muk Muk Mugalimba	WHNT Labelle Downs Station	Janamba Muk Muk Mugalimba_WHNT Labelle Downs Station	0.771694	0	18.7134
58029	CP0220	CP0255	0.0531022	-0.0690547	Janamba Muk Muk Mugalimba	WHNT Labelle Downs Station	Janamba Muk Muk Mugalimba_WHNT Labelle Downs Station	0.771898	0	18.7134
64082	CP0237	CP0272	0.0557293	-0.0667783	Janamba Muk Muk Mugalimba	WHNT Labelle Downs Station	Janamba Muk Muk Mugalimba_WHNT Labelle Downs Station	0.77552	0	18.7134
59753	CP0225	CP0250	0.0670159	-0.0616393	Janamba Muk Muk Mugalimba	WHNT Labelle Downs Station	Janamba Muk Muk Mugalimba_WHNT Labelle Downs Station	0.757587	0	18.7134
54233	CP0239	CP0176	0.0608853	-0.0574225	Janamba Muk Muk Mugalimba	WHNT Labelle Downs Station	Janamba Muk Muk Mugalimba_WHNT Labelle Downs Station	0.788166	0	18.7134
54200	CP0239	CP0262	0.0577376	-0.0522175	Janamba Muk Muk Mugalimba	WHNT Labelle Downs Station	Janamba Muk Muk Mugalimba_WHNT Labelle Downs Station	0.778281	0	18.7134
61377	CP0233	CP0176	0.0507651	-0.0506632	Janamba Muk Muk Mugalimba	WHNT Labelle Downs Station	Janamba Muk Muk Mugalimba_WHNT Labelle Downs Station	0.781728	0	18.7134
59787	CP0225	CP0255	0.0588235	-0.0476654	Janamba Muk Muk Mugalimba	WHNT Labelle Downs Station	Janamba Muk Muk Mugalimba_WHNT Labelle Downs Station	0.750274	0	18.7134
58019	CP0220	CP0272	0.056962	-0.0460044	Janamba Muk Muk Mugalimba	WHNT Labelle Downs Station	Janamba Muk Muk Mugalimba_WHNT Labelle Downs Station	0.787613	0	18.7134
58026	CP0220	CP0044	0.0478848	-0.0377737	Janamba Muk Muk Mugalimba	WHNT Labelle Downs Station	Janamba Muk Muk Mugalimba_WHNT Labelle Downs Station	0.782628	0	18.7134
57995	CP0220	CP0250	0.0499729	-0.0313187	Janamba Muk Muk Mugalimba	WHNT Labelle Downs Station	Janamba Muk Muk Mugalimba_WHNT Labelle Downs Station	0.788292	0	18.7134
62871	CP0236	CP0255	0.0509811	-0.0246212	Janamba Muk Muk Mugalimba	WHNT Labelle Downs Station	Janamba Muk Muk Mugalimba_WHNT Labelle Downs Station	0.771594	0	18.7134
59784	CP0225	CP0044	0.05841	-0.0228003	Janamba Muk Muk Mugalimba	WHNT Labelle Downs Station	Janamba Muk Muk Mugalimba_WHNT Labelle Downs Station	0.764918	0	18.7134
62868	CP0236	CP0044	0.0496557	-0.00875086	Janamba Muk Muk Mugalimba	WHNT Labelle Downs Station	Janamba Muk Muk Mugalimba_WHNT Labelle Downs Station	0.780989	0	18.7134
54254	CP0239	CP0044	0.0462177	-0.00766762	Janamba Muk Muk Mugalimba	WHNT Labelle Downs Station	Janamba Muk Muk Mugalimba_WHNT Labelle Downs Station	0.789222	0	18.7134
61401	CP0233	CP0255	0.0483312	0.0120177	Janamba Muk Muk Mugalimba	WHNT Labelle Downs Station	Janamba Muk Muk Mugalimba_WHNT Labelle Downs Station	0.766916	0	18.7134
61367	CP0233	CP0250	0.0490355	0.0161976	Janamba Muk Muk Mugalimba	WHNT Labelle Downs Station	Janamba Muk Muk Mugalimba_WHNT Labelle Downs Station	0.782495	0	18.7134
54212	CP0239	CP0268	0.0464654	0.0283929	Janamba Muk Muk Mugalimba	WHNT Labelle Downs Station	Janamba Muk Muk Mugalimba_WHNT Labelle Downs Station	0.80772	0	18.7134
64092	CP0237	CP0255	0.0513724	0.0452756	Janamba Muk Muk Mugalimba	WHNT Labelle Downs Station	Janamba Muk Muk Mugalimba_WHNT Labelle Downs Station	0.772904	0	18.7134
61398	CP0233	CP0044	0.040842	0.0489642	Janamba Muk Muk Mugalimba	WHNT Labelle Downs Station	Janamba Muk Muk Mugalimba_WHNT Labelle Downs Station	0.782296	0	18.7134
65192	CP0238	CP0255	0.0391835	0.0751705	Janamba Muk Muk Mugalimba	WHNT Labelle Downs Station	Janamba Muk Muk Mugalimba_WHNT Labelle Downs Station	0.789411	0	18.7134
64089	CP0237	CP0044	0.0384756	0.095122	Janamba Muk Muk Mugalimba	WHNT Labelle Downs Station	Janamba Muk Muk Mugalimba_WHNT Labelle Downs Station	0.795163	0	18.7134
54211	CP0239	CP0247	0.111836	-0.529586	Janamba Muk Muk Mugalimba	WHNT Litchfield Station	Janamba Muk Muk Mugalimba_WHNT Litchfield Station	0.73337	0	48.7587
59741	CP0225	CP0247	0.0890498	-0.433053	Janamba Muk Muk Mugalimba	WHNT Litchfield Station	Janamba Muk Muk Mugalimba_WHNT Litchfield Station	0.74724	0	48.7587
57983	CP0220	CP0247	0.0938008	-0.425689	Janamba Muk Muk Mugalimba	WHNT Litchfield Station	Janamba Muk Muk Mugalimba_WHNT Litchfield Station	0.753841	0	48.7587
54199	CP0239	CP0246	0.0828499	-0.203349	Janamba Muk Muk Mugalimba	WHNT Litchfield Station	Janamba Muk Muk Mugalimba_WHNT Litchfield Station	0.763053	0	48.7587
57971	CP0220	CP0246	0.0712349	-0.15929	Janamba Muk Muk Mugalimba	WHNT Litchfield Station	Janamba Muk Muk Mugalimba_WHNT Litchfield Station	0.772283	0	48.7587
58008	CP0220	CP0270	0.0665941	-0.127757	Janamba Muk Muk Mugalimba	WHNT Litchfield Station	Janamba Muk Muk Mugalimba_WHNT Litchfield Station	0.756759	0	48.7587
54255	CP0239	CP0190	0.0704225	-0.121077	Janamba Muk Muk Mugalimba	WHNT Litchfield Station	Janamba Muk Muk Mugalimba_WHNT Litchfield Station	0.755959	0	48.7587
54196	CP0239	CP0030	0.0746026	-0.117332	Janamba Muk Muk Mugalimba	WHNT Litchfield Station	Janamba Muk Muk Mugalimba_WHNT Litchfield Station	0.761922	0	48.7587
54236	CP0239	CP0270	0.0700382	-0.111171	Janamba Muk Muk Mugalimba	WHNT Litchfield Station	Janamba Muk Muk Mugalimba_WHNT Litchfield Station	0.762507	0	48.7587
58027	CP0220	CP0190	0.0621174	-0.108394	Janamba Muk Muk Mugalimba	WHNT Litchfield Station	Janamba Muk Muk Mugalimba_WHNT Litchfield Station	0.761973	0	48.7587
54220	CP0239	CP0035	0.06787	-0.100571	Janamba Muk Muk Mugalimba	WHNT Litchfield Station	Janamba Muk Muk Mugalimba_WHNT Litchfield Station	0.763899	0	48.7587
58004	CP0220	CP0036	0.0625	-0.0993426	Janamba Muk Muk Mugalimba	WHNT Litchfield Station	Janamba Muk Muk Mugalimba_WHNT Litchfield Station	0.766931	0	48.7587
54243	CP0239	CP0043	0.06215	-0.0857143	Janamba Muk Muk Mugalimba	WHNT Litchfield Station	Janamba Muk Muk Mugalimba_WHNT Litchfield Station	0.765854	0	48.7587
54187	CP0239	CP0244	0.0646793	-0.0846804	Janamba Muk Muk Mugalimba	WHNT Litchfield Station	Janamba Muk Muk Mugalimba_WHNT Litchfield Station	0.777145	0	48.7587
54253	CP0239	CP0019	0.0626467	-0.0823214	Janamba Muk Muk Mugalimba	WHNT Litchfield Station	Janamba Muk Muk Mugalimba_WHNT Litchfield Station	0.768279	0	48.7587
57996	CP0220	CP0269	0.0593006	-0.0817484	Janamba Muk Muk Mugalimba	WHNT Litchfield Station	Janamba Muk Muk Mugalimba_WHNT Litchfield Station	0.772621	0	48.7587
58015	CP0220	CP0043	0.0592579	-0.0800439	Janamba Muk Muk Mugalimba	WHNT Litchfield Station	Janamba Muk Muk Mugalimba_WHNT Litchfield Station	0.773415	0	48.7587
58025	CP0220	CP0019	0.0581563	-0.0791301	Janamba Muk Muk Mugalimba	WHNT Litchfield Station	Janamba Muk Muk Mugalimba_WHNT Litchfield Station	0.772866	0	48.7587
62869	CP0236	CP0190	0.062534	-0.0760646	Janamba Muk Muk Mugalimba	WHNT Litchfield Station	Janamba Muk Muk Mugalimba_WHNT Litchfield Station	0.758474	0	48.7587
57992	CP0220	CP0035	0.0568754	-0.0724453	Janamba Muk Muk Mugalimba	WHNT Litchfield Station	Janamba Muk Muk Mugalimba_WHNT Litchfield Station	0.774568	0	48.7587
59762	CP0225	CP0036	0.0660054	-0.0650393	Janamba Muk Muk Mugalimba	WHNT Litchfield Station	Janamba Muk Muk Mugalimba_WHNT Litchfield Station	0.755005	0	48.7587
62850	CP0236	CP0270	0.0613699	-0.064266	Janamba Muk Muk Mugalimba	WHNT Litchfield Station	Janamba Muk Muk Mugalimba_WHNT Litchfield Station	0.762283	0	48.7587
58007	CP0220	CP0251	0.0570603	-0.0625915	Janamba Muk Muk Mugalimba	WHNT Litchfield Station	Janamba Muk Muk Mugalimba_WHNT Litchfield Station	0.779523	0	48.7587
59754	CP0225	CP0269	0.0707454	-0.0590412	Janamba Muk Muk Mugalimba	WHNT Litchfield Station	Janamba Muk Muk Mugalimba_WHNT Litchfield Station	0.757174	0	48.7587
59750	CP0225	CP0035	0.0650568	-0.0533076	Janamba Muk Muk Mugalimba	WHNT Litchfield Station	Janamba Muk Muk Mugalimba_WHNT Litchfield Station	0.75455	0	48.7587
54235	CP0239	CP0251	0.0574067	-0.0530357	Janamba Muk Muk Mugalimba	WHNT Litchfield Station	Janamba Muk Muk Mugalimba_WHNT Litchfield Station	0.776983	0	48.7587
59765	CP0225	CP0251	0.0629409	-0.0519608	Janamba Muk Muk Mugalimba	WHNT Litchfield Station	Janamba Muk Muk Mugalimba_WHNT Litchfield Station	0.757461	0	48.7587
54186	CP0239	CP0196	0.0573237	-0.0478571	Janamba Muk Muk Mugalimba	WHNT Litchfield Station	Janamba Muk Muk Mugalimba_WHNT Litchfield Station	0.779928	0	48.7587
54232	CP0239	CP0036	0.0576228	-0.0435714	Janamba Muk Muk Mugalimba	WHNT Litchfield Station	Janamba Muk Muk Mugalimba_WHNT Litchfield Station	0.782695	0	48.7587
59766	CP0225	CP0270	0.0597747	-0.0368693	Janamba Muk Muk Mugalimba	WHNT Litchfield Station	Janamba Muk Muk Mugalimba_WHNT Litchfield Station	0.758176	0	48.7587
59773	CP0225	CP0043	0.0620491	-0.0330764	Janamba Muk Muk Mugalimba	WHNT Litchfield Station	Janamba Muk Muk Mugalimba_WHNT Litchfield Station	0.762626	0	48.7587
54197	CP0239	CP0071	0.055666	-0.0317857	Janamba Muk Muk Mugalimba	WHNT Litchfield Station	Janamba Muk Muk Mugalimba_WHNT Litchfield Station	0.786553	0	48.7587
59783	CP0225	CP0019	0.057148	-0.0308241	Janamba Muk Muk Mugalimba	WHNT Litchfield Station	Janamba Muk Muk Mugalimba_WHNT Litchfield Station	0.762214	0	48.7587
62857	CP0236	CP0043	0.0535002	-0.0276442	Janamba Muk Muk Mugalimba	WHNT Litchfield Station	Janamba Muk Muk Mugalimba_WHNT Litchfield Station	0.774846	0	48.7587
62867	CP0236	CP0019	0.052021	-0.0204327	Janamba Muk Muk Mugalimba	WHNT Litchfield Station	Janamba Muk Muk Mugalimba_WHNT Litchfield Station	0.777325	0	48.7587
59785	CP0225	CP0190	0.0548044	-0.0186256	Janamba Muk Muk Mugalimba	WHNT Litchfield Station	Janamba Muk Muk Mugalimba_WHNT Litchfield Station	0.763656	0	48.7587
61397	CP0233	CP0019	0.0552357	-0.0181582	Janamba Muk Muk Mugalimba	WHNT Litchfield Station	Janamba Muk Muk Mugalimba_WHNT Litchfield Station	0.767722	0	48.7587
61399	CP0233	CP0190	0.0573947	-0.0155465	Janamba Muk Muk Mugalimba	WHNT Litchfield Station	Janamba Muk Muk Mugalimba_WHNT Litchfield Station	0.762055	0	48.7587
61376	CP0233	CP0036	0.0556156	-0.0136155	Janamba Muk Muk Mugalimba	WHNT Litchfield Station	Janamba Muk Muk Mugalimba_WHNT Litchfield Station	0.773848	0	48.7587
54224	CP0239	CP0269	0.0473523	-0.00841088	Janamba Muk Muk Mugalimba	WHNT Litchfield Station	Janamba Muk Muk Mugalimba_WHNT Litchfield Station	0.79062	0	48.7587
61380	CP0233	CP0270	0.0547796	-0.00712025	Janamba Muk Muk Mugalimba	WHNT Litchfield Station	Janamba Muk Muk Mugalimba_WHNT Litchfield Station	0.764103	0	48.7587
62849	CP0236	CP0251	0.0534448	-0.000688231	Janamba Muk Muk Mugalimba	WHNT Litchfield Station	Janamba Muk Muk Mugalimba_WHNT Litchfield Station	0.788947	0	48.7587
64088	CP0237	CP0019	0.0485526	0.00412541	Janamba Muk Muk Mugalimba	WHNT Litchfield Station	Janamba Muk Muk Mugalimba_WHNT Litchfield Station	0.773269	0	48.7587
61368	CP0233	CP0269	0.0489914	0.0104762	Janamba Muk Muk Mugalimba	WHNT Litchfield Station	Janamba Muk Muk Mugalimba_WHNT Litchfield Station	0.771254	0	48.7587
64090	CP0237	CP0190	0.0529498	0.01868	Janamba Muk Muk Mugalimba	WHNT Litchfield Station	Janamba Muk Muk Mugalimba_WHNT Litchfield Station	0.769696	0	48.7587
61387	CP0233	CP0043	0.0491449	0.0202703	Janamba Muk Muk Mugalimba	WHNT Litchfield Station	Janamba Muk Muk Mugalimba_WHNT Litchfield Station	0.774347	0	48.7587
61379	CP0233	CP0251	0.0462094	0.0293542	Janamba Muk Muk Mugalimba	WHNT Litchfield Station	Janamba Muk Muk Mugalimba_WHNT Litchfield Station	0.78574	0	48.7587
58068	CP0220	CP0374	0.102126	-0.266679	Janamba Muk Muk Mugalimba	WHNT Maningrida Bawinanga Liverpool Rv Blyth Rv	Janamba Muk Muk Mugalimba_WHNT Maningrida Bawinanga Liverpool Rv Blyth Rv	0.722061	1	448.948
58042	CP0220	CP0165	0.100757	-0.2626	Janamba Muk Muk Mugalimba	WHNT Maningrida Bawinanga Liverpool Rv Blyth Rv	Janamba Muk Muk Mugalimba_WHNT Maningrida Bawinanga Liverpool Rv Blyth Rv	0.724405	1	448.948
54296	CP0239	CP0374	0.0985967	-0.249459	Janamba Muk Muk Mugalimba	WHNT Maningrida Bawinanga Liverpool Rv Blyth Rv	Janamba Muk Muk Mugalimba_WHNT Maningrida Bawinanga Liverpool Rv Blyth Rv	0.719701	1	448.948
54270	CP0239	CP0165	0.0961678	-0.241866	Janamba Muk Muk Mugalimba	WHNT Maningrida Bawinanga Liverpool Rv Blyth Rv	Janamba Muk Muk Mugalimba_WHNT Maningrida Bawinanga Liverpool Rv Blyth Rv	0.725235	1	448.948
58077	CP0220	CP0186	0.0901388	-0.237947	Janamba Muk Muk Mugalimba	WHNT Maningrida Bawinanga Liverpool Rv Blyth Rv	Janamba Muk Muk Mugalimba_WHNT Maningrida Bawinanga Liverpool Rv Blyth Rv	0.725888	1	448.948
58064	CP0220	CP0023	0.0912376	-0.228587	Janamba Muk Muk Mugalimba	WHNT Maningrida Bawinanga Liverpool Rv Blyth Rv	Janamba Muk Muk Mugalimba_WHNT Maningrida Bawinanga Liverpool Rv Blyth Rv	0.731617	1	448.948
61414	CP0233	CP0165	0.0895173	-0.226302	Janamba Muk Muk Mugalimba	WHNT Maningrida Bawinanga Liverpool Rv Blyth Rv	Janamba Muk Muk Mugalimba_WHNT Maningrida Bawinanga Liverpool Rv Blyth Rv	0.727936	1	448.948
54331	CP0239	CP0337	0.0969955	-0.222424	Janamba Muk Muk Mugalimba	WHNT Maningrida Bawinanga Liverpool Rv Blyth Rv	Janamba Muk Muk Mugalimba_WHNT Maningrida Bawinanga Liverpool Rv Blyth Rv	0.727745	1	448.948
54260	CP0239	CP0297	0.0929476	-0.21569	Janamba Muk Muk Mugalimba	WHNT Maningrida Bawinanga Liverpool Rv Blyth Rv	Janamba Muk Muk Mugalimba_WHNT Maningrida Bawinanga Liverpool Rv Blyth Rv	0.730832	1	448.948
62884	CP0236	CP0165	0.0896389	-0.215455	Janamba Muk Muk Mugalimba	WHNT Maningrida Bawinanga Liverpool Rv Blyth Rv	Janamba Muk Muk Mugalimba_WHNT Maningrida Bawinanga Liverpool Rv Blyth Rv	0.732626	1	448.948
58032	CP0220	CP0297	0.0849261	-0.215303	Janamba Muk Muk Mugalimba	WHNT Maningrida Bawinanga Liverpool Rv Blyth Rv	Janamba Muk Muk Mugalimba_WHNT Maningrida Bawinanga Liverpool Rv Blyth Rv	0.731789	1	448.948
58103	CP0220	CP0337	0.0900518	-0.213383	Janamba Muk Muk Mugalimba	WHNT Maningrida Bawinanga Liverpool Rv Blyth Rv	Janamba Muk Muk Mugalimba_WHNT Maningrida Bawinanga Liverpool Rv Blyth Rv	0.735207	1	448.948
58045	CP0220	CP0342	0.078552	-0.212427	Janamba Muk Muk Mugalimba	WHNT Maningrida Bawinanga Liverpool Rv Blyth Rv	Janamba Muk Muk Mugalimba_WHNT Maningrida Bawinanga Liverpool Rv Blyth Rv	0.726787	1	448.948
54273	CP0239	CP0342	0.0844227	-0.211828	Janamba Muk Muk Mugalimba	WHNT Maningrida Bawinanga Liverpool Rv Blyth Rv	Janamba Muk Muk Mugalimba_WHNT Maningrida Bawinanga Liverpool Rv Blyth Rv	0.723856	1	448.948
54292	CP0239	CP0023	0.0905961	-0.205587	Janamba Muk Muk Mugalimba	WHNT Maningrida Bawinanga Liverpool Rv Blyth Rv	Janamba Muk Muk Mugalimba_WHNT Maningrida Bawinanga Liverpool Rv Blyth Rv	0.733647	1	448.948
59800	CP0225	CP0165	0.0837394	-0.204348	Janamba Muk Muk Mugalimba	WHNT Maningrida Bawinanga Liverpool Rv Blyth Rv	Janamba Muk Muk Mugalimba_WHNT Maningrida Bawinanga Liverpool Rv Blyth Rv	0.7329	1	448.948
62910	CP0236	CP0374	0.0938357	-0.202142	Janamba Muk Muk Mugalimba	WHNT Maningrida Bawinanga Liverpool Rv Blyth Rv	Janamba Muk Muk Mugalimba_WHNT Maningrida Bawinanga Liverpool Rv Blyth Rv	0.722151	1	448.948
65205	CP0238	CP0165	0.0808281	-0.201805	Janamba Muk Muk Mugalimba	WHNT Maningrida Bawinanga Liverpool Rv Blyth Rv	Janamba Muk Muk Mugalimba_WHNT Maningrida Bawinanga Liverpool Rv Blyth Rv	0.730873	1	448.948
58079	CP0220	CP0329	0.0813127	-0.197901	Janamba Muk Muk Mugalimba	WHNT Maningrida Bawinanga Liverpool Rv Blyth Rv	Janamba Muk Muk Mugalimba_WHNT Maningrida Bawinanga Liverpool Rv Blyth Rv	0.735734	1	448.948
58089	CP0220	CP0191	0.0805781	-0.197696	Janamba Muk Muk Mugalimba	WHNT Maningrida Bawinanga Liverpool Rv Blyth Rv	Janamba Muk Muk Mugalimba_WHNT Maningrida Bawinanga Liverpool Rv Blyth Rv	0.735953	1	448.948
54342	CP0239	CP0338	0.0818479	-0.19598	Janamba Muk Muk Mugalimba	WHNT Maningrida Bawinanga Liverpool Rv Blyth Rv	Janamba Muk Muk Mugalimba_WHNT Maningrida Bawinanga Liverpool Rv Blyth Rv	0.729174	1	448.948
61440	CP0233	CP0374	0.0915199	-0.189221	Janamba Muk Muk Mugalimba	WHNT Maningrida Bawinanga Liverpool Rv Blyth Rv	Janamba Muk Muk Mugalimba_WHNT Maningrida Bawinanga Liverpool Rv Blyth Rv	0.718812	1	448.948
64105	CP0237	CP0165	0.077953	-0.188645	Janamba Muk Muk Mugalimba	WHNT Maningrida Bawinanga Liverpool Rv Blyth Rv	Janamba Muk Muk Mugalimba_WHNT Maningrida Bawinanga Liverpool Rv Blyth Rv	0.733125	1	448.948
54307	CP0239	CP0329	0.0830133	-0.186143	Janamba Muk Muk Mugalimba	WHNT Maningrida Bawinanga Liverpool Rv Blyth Rv	Janamba Muk Muk Mugalimba_WHNT Maningrida Bawinanga Liverpool Rv Blyth Rv	0.736241	1	448.948
54305	CP0239	CP0186	0.0831826	-0.1775	Janamba Muk Muk Mugalimba	WHNT Maningrida Bawinanga Liverpool Rv Blyth Rv	Janamba Muk Muk Mugalimba_WHNT Maningrida Bawinanga Liverpool Rv Blyth Rv	0.740145	1	448.948
58114	CP0220	CP0338	0.0741748	-0.173488	Janamba Muk Muk Mugalimba	WHNT Maningrida Bawinanga Liverpool Rv Blyth Rv	Janamba Muk Muk Mugalimba_WHNT Maningrida Bawinanga Liverpool Rv Blyth Rv	0.742927	1	448.948
58065	CP0220	CP0171	0.0756424	-0.167033	Janamba Muk Muk Mugalimba	WHNT Maningrida Bawinanga Liverpool Rv Blyth Rv	Janamba Muk Muk Mugalimba_WHNT Maningrida Bawinanga Liverpool Rv Blyth Rv	0.746109	1	448.948
54304	CP0239	CP0033	0.0764228	-0.166964	Janamba Muk Muk Mugalimba	WHNT Maningrida Bawinanga Liverpool Rv Blyth Rv	Janamba Muk Muk Mugalimba_WHNT Maningrida Bawinanga Liverpool Rv Blyth Rv	0.739024	1	448.948
59826	CP0225	CP0374	0.0833333	-0.165827	Janamba Muk Muk Mugalimba	WHNT Maningrida Bawinanga Liverpool Rv Blyth Rv	Janamba Muk Muk Mugalimba_WHNT Maningrida Bawinanga Liverpool Rv Blyth Rv	0.722798	1	448.948
54317	CP0239	CP0191	0.0737452	-0.164577	Janamba Muk Muk Mugalimba	WHNT Maningrida Bawinanga Liverpool Rv Blyth Rv	Janamba Muk Muk Mugalimba_WHNT Maningrida Bawinanga Liverpool Rv Blyth Rv	0.737543	1	448.948
62919	CP0236	CP0186	0.0825921	-0.164089	Janamba Muk Muk Mugalimba	WHNT Maningrida Bawinanga Liverpool Rv Blyth Rv	Janamba Muk Muk Mugalimba_WHNT Maningrida Bawinanga Liverpool Rv Blyth Rv	0.731803	1	448.948
62874	CP0236	CP0297	0.0822291	-0.162603	Janamba Muk Muk Mugalimba	WHNT Maningrida Bawinanga Liverpool Rv Blyth Rv	Janamba Muk Muk Mugalimba_WHNT Maningrida Bawinanga Liverpool Rv Blyth Rv	0.731984	1	448.948
54340	CP0239	CP0253	0.0731311	-0.161429	Janamba Muk Muk Mugalimba	WHNT Maningrida Bawinanga Liverpool Rv Blyth Rv	Janamba Muk Muk Mugalimba_WHNT Maningrida Bawinanga Liverpool Rv Blyth Rv	0.738714	1	448.948
62906	CP0236	CP0023	0.0822117	-0.157414	Janamba Muk Muk Mugalimba	WHNT Maningrida Bawinanga Liverpool Rv Blyth Rv	Janamba Muk Muk Mugalimba_WHNT Maningrida Bawinanga Liverpool Rv Blyth Rv	0.735449	1	448.948
64131	CP0237	CP0374	0.0808212	-0.153545	Janamba Muk Muk Mugalimba	WHNT Maningrida Bawinanga Liverpool Rv Blyth Rv	Janamba Muk Muk Mugalimba_WHNT Maningrida Bawinanga Liverpool Rv Blyth Rv	0.726188	1	448.948
62945	CP0236	CP0337	0.0817352	-0.152572	Janamba Muk Muk Mugalimba	WHNT Maningrida Bawinanga Liverpool Rv Blyth Rv	Janamba Muk Muk Mugalimba_WHNT Maningrida Bawinanga Liverpool Rv Blyth Rv	0.73692	1	448.948
54293	CP0239	CP0171	0.0742287	-0.15233	Janamba Muk Muk Mugalimba	WHNT Maningrida Bawinanga Liverpool Rv Blyth Rv	Janamba Muk Muk Mugalimba_WHNT Maningrida Bawinanga Liverpool Rv Blyth Rv	0.74392	1	448.948
58112	CP0220	CP0253	0.0660785	-0.152047	Janamba Muk Muk Mugalimba	WHNT Maningrida Bawinanga Liverpool Rv Blyth Rv	Janamba Muk Muk Mugalimba_WHNT Maningrida Bawinanga Liverpool Rv Blyth Rv	0.744869	1	448.948
58076	CP0220	CP0033	0.0664745	-0.149088	Janamba Muk Muk Mugalimba	WHNT Maningrida Bawinanga Liverpool Rv Blyth Rv	Janamba Muk Muk Mugalimba_WHNT Maningrida Bawinanga Liverpool Rv Blyth Rv	0.746082	1	448.948
58100	CP0220	CP0037	0.067699	-0.148649	Janamba Muk Muk Mugalimba	WHNT Maningrida Bawinanga Liverpool Rv Blyth Rv	Janamba Muk Muk Mugalimba_WHNT Maningrida Bawinanga Liverpool Rv Blyth Rv	0.747929	1	448.948
58033	CP0220	CP0340	0.0687726	-0.147944	Janamba Muk Muk Mugalimba	WHNT Maningrida Bawinanga Liverpool Rv Blyth Rv	Janamba Muk Muk Mugalimba_WHNT Maningrida Bawinanga Liverpool Rv Blyth Rv	0.750181	1	448.948
58101	CP0220	CP0245	0.0687793	-0.147263	Janamba Muk Muk Mugalimba	WHNT Maningrida Bawinanga Liverpool Rv Blyth Rv	Janamba Muk Muk Mugalimba_WHNT Maningrida Bawinanga Liverpool Rv Blyth Rv	0.74946	1	448.948
54329	CP0239	CP0245	0.071506	-0.144793	Janamba Muk Muk Mugalimba	WHNT Maningrida Bawinanga Liverpool Rv Blyth Rv	Janamba Muk Muk Mugalimba_WHNT Maningrida Bawinanga Liverpool Rv Blyth Rv	0.745034	1	448.948
59861	CP0225	CP0337	0.0870209	-0.141622	Janamba Muk Muk Mugalimba	WHNT Maningrida Bawinanga Liverpool Rv Blyth Rv	Janamba Muk Muk Mugalimba_WHNT Maningrida Bawinanga Liverpool Rv Blyth Rv	0.72968	1	448.948
62887	CP0236	CP0342	0.0727173	-0.14	Janamba Muk Muk Mugalimba	WHNT Maningrida Bawinanga Liverpool Rv Blyth Rv	Janamba Muk Muk Mugalimba_WHNT Maningrida Bawinanga Liverpool Rv Blyth Rv	0.734463	1	448.948
61436	CP0233	CP0023	0.0843112	-0.138669	Janamba Muk Muk Mugalimba	WHNT Maningrida Bawinanga Liverpool Rv Blyth Rv	Janamba Muk Muk Mugalimba_WHNT Maningrida Bawinanga Liverpool Rv Blyth Rv	0.734248	1	448.948
65231	CP0238	CP0374	0.0802178	-0.137324	Janamba Muk Muk Mugalimba	WHNT Maningrida Bawinanga Liverpool Rv Blyth Rv	Janamba Muk Muk Mugalimba_WHNT Maningrida Bawinanga Liverpool Rv Blyth Rv	0.735299	1	448.948
59822	CP0225	CP0023	0.0806802	-0.13698	Janamba Muk Muk Mugalimba	WHNT Maningrida Bawinanga Liverpool Rv Blyth Rv	Janamba Muk Muk Mugalimba_WHNT Maningrida Bawinanga Liverpool Rv Blyth Rv	0.732001	1	448.948
62931	CP0236	CP0191	0.0751182	-0.13688	Janamba Muk Muk Mugalimba	WHNT Maningrida Bawinanga Liverpool Rv Blyth Rv	Janamba Muk Muk Mugalimba_WHNT Maningrida Bawinanga Liverpool Rv Blyth Rv	0.738723	1	448.948
62956	CP0236	CP0338	0.0763331	-0.134921	Janamba Muk Muk Mugalimba	WHNT Maningrida Bawinanga Liverpool Rv Blyth Rv	Janamba Muk Muk Mugalimba_WHNT Maningrida Bawinanga Liverpool Rv Blyth Rv	0.740321	1	448.948
54328	CP0239	CP0037	0.0725894	-0.134451	Janamba Muk Muk Mugalimba	WHNT Maningrida Bawinanga Liverpool Rv Blyth Rv	Janamba Muk Muk Mugalimba_WHNT Maningrida Bawinanga Liverpool Rv Blyth Rv	0.751354	1	448.948
54261	CP0239	CP0340	0.0702644	-0.134382	Janamba Muk Muk Mugalimba	WHNT Maningrida Bawinanga Liverpool Rv Blyth Rv	Janamba Muk Muk Mugalimba_WHNT Maningrida Bawinanga Liverpool Rv Blyth Rv	0.748823	1	448.948
65227	CP0238	CP0023	0.0777698	-0.13177	Janamba Muk Muk Mugalimba	WHNT Maningrida Bawinanga Liverpool Rv Blyth Rv	Janamba Muk Muk Mugalimba_WHNT Maningrida Bawinanga Liverpool Rv Blyth Rv	0.732588	1	448.948
62921	CP0236	CP0329	0.0741693	-0.131597	Janamba Muk Muk Mugalimba	WHNT Maningrida Bawinanga Liverpool Rv Blyth Rv	Janamba Muk Muk Mugalimba_WHNT Maningrida Bawinanga Liverpool Rv Blyth Rv	0.740224	1	448.948
61404	CP0233	CP0297	0.0848649	-0.128845	Janamba Muk Muk Mugalimba	WHNT Maningrida Bawinanga Liverpool Rv Blyth Rv	Janamba Muk Muk Mugalimba_WHNT Maningrida Bawinanga Liverpool Rv Blyth Rv	0.723874	1	448.948
64127	CP0237	CP0023	0.0753815	-0.127695	Janamba Muk Muk Mugalimba	WHNT Maningrida Bawinanga Liverpool Rv Blyth Rv	Janamba Muk Muk Mugalimba_WHNT Maningrida Bawinanga Liverpool Rv Blyth Rv	0.732855	1	448.948
61475	CP0233	CP0337	0.0820399	-0.126159	Janamba Muk Muk Mugalimba	WHNT Maningrida Bawinanga Liverpool Rv Blyth Rv	Janamba Muk Muk Mugalimba_WHNT Maningrida Bawinanga Liverpool Rv Blyth Rv	0.732631	1	448.948
64166	CP0237	CP0337	0.0817018	-0.12441	Janamba Muk Muk Mugalimba	WHNT Maningrida Bawinanga Liverpool Rv Blyth Rv	Janamba Muk Muk Mugalimba_WHNT Maningrida Bawinanga Liverpool Rv Blyth Rv	0.733057	1	448.948
54281	CP0239	CP0020	0.0677262	-0.124375	Janamba Muk Muk Mugalimba	WHNT Maningrida Bawinanga Liverpool Rv Blyth Rv	Janamba Muk Muk Mugalimba_WHNT Maningrida Bawinanga Liverpool Rv Blyth Rv	0.751761	1	448.948
59790	CP0225	CP0297	0.0835891	-0.122909	Janamba Muk Muk Mugalimba	WHNT Maningrida Bawinanga Liverpool Rv Blyth Rv	Janamba Muk Muk Mugalimba_WHNT Maningrida Bawinanga Liverpool Rv Blyth Rv	0.734068	1	448.948
62907	CP0236	CP0171	0.0715977	-0.120511	Janamba Muk Muk Mugalimba	WHNT Maningrida Bawinanga Liverpool Rv Blyth Rv	Janamba Muk Muk Mugalimba_WHNT Maningrida Bawinanga Liverpool Rv Blyth Rv	0.744216	1	448.948
59835	CP0225	CP0186	0.0792562	-0.116967	Janamba Muk Muk Mugalimba	WHNT Maningrida Bawinanga Liverpool Rv Blyth Rv	Janamba Muk Muk Mugalimba_WHNT Maningrida Bawinanga Liverpool Rv Blyth Rv	0.732623	1	448.948
59837	CP0225	CP0329	0.0766843	-0.112809	Janamba Muk Muk Mugalimba	WHNT Maningrida Bawinanga Liverpool Rv Blyth Rv	Janamba Muk Muk Mugalimba_WHNT Maningrida Bawinanga Liverpool Rv Blyth Rv	0.732518	1	448.948
58053	CP0220	CP0020	0.0624887	-0.111578	Janamba Muk Muk Mugalimba	WHNT Maningrida Bawinanga Liverpool Rv Blyth Rv	Janamba Muk Muk Mugalimba_WHNT Maningrida Bawinanga Liverpool Rv Blyth Rv	0.76094	1	448.948
61449	CP0233	CP0186	0.0798198	-0.109099	Janamba Muk Muk Mugalimba	WHNT Maningrida Bawinanga Liverpool Rv Blyth Rv	Janamba Muk Muk Mugalimba_WHNT Maningrida Bawinanga Liverpool Rv Blyth Rv	0.731261	1	448.948
65266	CP0238	CP0337	0.0759003	-0.103477	Janamba Muk Muk Mugalimba	WHNT Maningrida Bawinanga Liverpool Rv Blyth Rv	Janamba Muk Muk Mugalimba_WHNT Maningrida Bawinanga Liverpool Rv Blyth Rv	0.739335	1	448.948
62875	CP0236	CP0340	0.0668969	-0.101482	Janamba Muk Muk Mugalimba	WHNT Maningrida Bawinanga Liverpool Rv Blyth Rv	Janamba Muk Muk Mugalimba_WHNT Maningrida Bawinanga Liverpool Rv Blyth Rv	0.749591	1	448.948
62918	CP0236	CP0033	0.0667392	-0.0995879	Janamba Muk Muk Mugalimba	WHNT Maningrida Bawinanga Liverpool Rv Blyth Rv	Janamba Muk Muk Mugalimba_WHNT Maningrida Bawinanga Liverpool Rv Blyth Rv	0.750091	1	448.948
59803	CP0225	CP0342	0.0706906	-0.0970342	Janamba Muk Muk Mugalimba	WHNT Maningrida Bawinanga Liverpool Rv Blyth Rv	Janamba Muk Muk Mugalimba_WHNT Maningrida Bawinanga Liverpool Rv Blyth Rv	0.735001	1	448.948
59847	CP0225	CP0191	0.072178	-0.0920374	Janamba Muk Muk Mugalimba	WHNT Maningrida Bawinanga Liverpool Rv Blyth Rv	Janamba Muk Muk Mugalimba_WHNT Maningrida Bawinanga Liverpool Rv Blyth Rv	0.73996	1	448.948
65195	CP0238	CP0297	0.0750945	-0.0910938	Janamba Muk Muk Mugalimba	WHNT Maningrida Bawinanga Liverpool Rv Blyth Rv	Janamba Muk Muk Mugalimba_WHNT Maningrida Bawinanga Liverpool Rv Blyth Rv	0.734468	1	448.948
59872	CP0225	CP0338	0.070819	-0.0850032	Janamba Muk Muk Mugalimba	WHNT Maningrida Bawinanga Liverpool Rv Blyth Rv	Janamba Muk Muk Mugalimba_WHNT Maningrida Bawinanga Liverpool Rv Blyth Rv	0.742146	1	448.948
62942	CP0236	CP0037	0.0603589	-0.0827042	Janamba Muk Muk Mugalimba	WHNT Maningrida Bawinanga Liverpool Rv Blyth Rv	Janamba Muk Muk Mugalimba_WHNT Maningrida Bawinanga Liverpool Rv Blyth Rv	0.752583	1	448.948
59834	CP0225	CP0033	0.0685426	-0.0810289	Janamba Muk Muk Mugalimba	WHNT Maningrida Bawinanga Liverpool Rv Blyth Rv	Janamba Muk Muk Mugalimba_WHNT Maningrida Bawinanga Liverpool Rv Blyth Rv	0.742605	1	448.948
61451	CP0233	CP0329	0.0726908	-0.079222	Janamba Muk Muk Mugalimba	WHNT Maningrida Bawinanga Liverpool Rv Blyth Rv	Janamba Muk Muk Mugalimba_WHNT Maningrida Bawinanga Liverpool Rv Blyth Rv	0.739024	1	448.948
62895	CP0236	CP0020	0.0621827	-0.078125	Janamba Muk Muk Mugalimba	WHNT Maningrida Bawinanga Liverpool Rv Blyth Rv	Janamba Muk Muk Mugalimba_WHNT Maningrida Bawinanga Liverpool Rv Blyth Rv	0.75698	1	448.948
61417	CP0233	CP0342	0.0685601	-0.0772383	Janamba Muk Muk Mugalimba	WHNT Maningrida Bawinanga Liverpool Rv Blyth Rv	Janamba Muk Muk Mugalimba_WHNT Maningrida Bawinanga Liverpool Rv Blyth Rv	0.737337	1	448.948
65240	CP0238	CP0186	0.0720331	-0.0764868	Janamba Muk Muk Mugalimba	WHNT Maningrida Bawinanga Liverpool Rv Blyth Rv	Janamba Muk Muk Mugalimba_WHNT Maningrida Bawinanga Liverpool Rv Blyth Rv	0.733387	1	448.948
59791	CP0225	CP0340	0.0665341	-0.0722329	Janamba Muk Muk Mugalimba	WHNT Maningrida Bawinanga Liverpool Rv Blyth Rv	Janamba Muk Muk Mugalimba_WHNT Maningrida Bawinanga Liverpool Rv Blyth Rv	0.744983	1	448.948
61448	CP0233	CP0033	0.0678668	-0.0692525	Janamba Muk Muk Mugalimba	WHNT Maningrida Bawinanga Liverpool Rv Blyth Rv	Janamba Muk Muk Mugalimba_WHNT Maningrida Bawinanga Liverpool Rv Blyth Rv	0.741584	1	448.948
62943	CP0236	CP0245	0.0616277	-0.0669643	Janamba Muk Muk Mugalimba	WHNT Maningrida Bawinanga Liverpool Rv Blyth Rv	Janamba Muk Muk Mugalimba_WHNT Maningrida Bawinanga Liverpool Rv Blyth Rv	0.762371	1	448.948
61405	CP0233	CP0340	0.0671238	-0.0669081	Janamba Muk Muk Mugalimba	WHNT Maningrida Bawinanga Liverpool Rv Blyth Rv	Janamba Muk Muk Mugalimba_WHNT Maningrida Bawinanga Liverpool Rv Blyth Rv	0.742241	1	448.948
61461	CP0233	CP0191	0.0680628	-0.0666352	Janamba Muk Muk Mugalimba	WHNT Maningrida Bawinanga Liverpool Rv Blyth Rv	Janamba Muk Muk Mugalimba_WHNT Maningrida Bawinanga Liverpool Rv Blyth Rv	0.743365	1	448.948
62954	CP0236	CP0253	0.0549212	-0.0656357	Janamba Muk Muk Mugalimba	WHNT Maningrida Bawinanga Liverpool Rv Blyth Rv	Janamba Muk Muk Mugalimba_WHNT Maningrida Bawinanga Liverpool Rv Blyth Rv	0.756571	1	448.948
64177	CP0237	CP0338	0.0747646	-0.0649547	Janamba Muk Muk Mugalimba	WHNT Maningrida Bawinanga Liverpool Rv Blyth Rv	Janamba Muk Muk Mugalimba_WHNT Maningrida Bawinanga Liverpool Rv Blyth Rv	0.729555	1	448.948
64095	CP0237	CP0297	0.069712	-0.0640903	Janamba Muk Muk Mugalimba	WHNT Maningrida Bawinanga Liverpool Rv Blyth Rv	Janamba Muk Muk Mugalimba_WHNT Maningrida Bawinanga Liverpool Rv Blyth Rv	0.744359	1	448.948
59823	CP0225	CP0171	0.0668599	-0.0596005	Janamba Muk Muk Mugalimba	WHNT Maningrida Bawinanga Liverpool Rv Blyth Rv	Janamba Muk Muk Mugalimba_WHNT Maningrida Bawinanga Liverpool Rv Blyth Rv	0.752129	1	448.948
64140	CP0237	CP0186	0.067156	-0.0574178	Janamba Muk Muk Mugalimba	WHNT Maningrida Bawinanga Liverpool Rv Blyth Rv	Janamba Muk Muk Mugalimba_WHNT Maningrida Bawinanga Liverpool Rv Blyth Rv	0.737615	1	448.948
59870	CP0225	CP0253	0.0585902	-0.0560733	Janamba Muk Muk Mugalimba	WHNT Maningrida Bawinanga Liverpool Rv Blyth Rv	Janamba Muk Muk Mugalimba_WHNT Maningrida Bawinanga Liverpool Rv Blyth Rv	0.74662	1	448.948
59858	CP0225	CP0037	0.0621958	-0.0555556	Janamba Muk Muk Mugalimba	WHNT Maningrida Bawinanga Liverpool Rv Blyth Rv	Janamba Muk Muk Mugalimba_WHNT Maningrida Bawinanga Liverpool Rv Blyth Rv	0.750315	1	448.948
61486	CP0233	CP0338	0.0641537	-0.0552915	Janamba Muk Muk Mugalimba	WHNT Maningrida Bawinanga Liverpool Rv Blyth Rv	Janamba Muk Muk Mugalimba_WHNT Maningrida Bawinanga Liverpool Rv Blyth Rv	0.746557	1	448.948
65242	CP0238	CP0329	0.0682936	-0.0552109	Janamba Muk Muk Mugalimba	WHNT Maningrida Bawinanga Liverpool Rv Blyth Rv	Janamba Muk Muk Mugalimba_WHNT Maningrida Bawinanga Liverpool Rv Blyth Rv	0.742306	1	448.948
65277	CP0238	CP0338	0.065942	-0.0526235	Janamba Muk Muk Mugalimba	WHNT Maningrida Bawinanga Liverpool Rv Blyth Rv	Janamba Muk Muk Mugalimba_WHNT Maningrida Bawinanga Liverpool Rv Blyth Rv	0.741576	1	448.948
59859	CP0225	CP0245	0.0623761	-0.0511254	Janamba Muk Muk Mugalimba	WHNT Maningrida Bawinanga Liverpool Rv Blyth Rv	Janamba Muk Muk Mugalimba_WHNT Maningrida Bawinanga Liverpool Rv Blyth Rv	0.75338	1	448.948
59811	CP0225	CP0020	0.0613054	-0.0508039	Janamba Muk Muk Mugalimba	WHNT Maningrida Bawinanga Liverpool Rv Blyth Rv	Janamba Muk Muk Mugalimba_WHNT Maningrida Bawinanga Liverpool Rv Blyth Rv	0.752434	1	448.948
61437	CP0233	CP0171	0.0650995	-0.0498108	Janamba Muk Muk Mugalimba	WHNT Maningrida Bawinanga Liverpool Rv Blyth Rv	Janamba Muk Muk Mugalimba_WHNT Maningrida Bawinanga Liverpool Rv Blyth Rv	0.749729	1	448.948
65252	CP0238	CP0191	0.0653194	-0.0471437	Janamba Muk Muk Mugalimba	WHNT Maningrida Bawinanga Liverpool Rv Blyth Rv	Janamba Muk Muk Mugalimba_WHNT Maningrida Bawinanga Liverpool Rv Blyth Rv	0.743865	1	448.948
61484	CP0233	CP0253	0.0575747	-0.0423995	Janamba Muk Muk Mugalimba	WHNT Maningrida Bawinanga Liverpool Rv Blyth Rv	Janamba Muk Muk Mugalimba_WHNT Maningrida Bawinanga Liverpool Rv Blyth Rv	0.746851	1	448.948
64108	CP0237	CP0342	0.0663106	-0.0421941	Janamba Muk Muk Mugalimba	WHNT Maningrida Bawinanga Liverpool Rv Blyth Rv	Janamba Muk Muk Mugalimba_WHNT Maningrida Bawinanga Liverpool Rv Blyth Rv	0.734942	1	448.948
65208	CP0238	CP0342	0.0598445	-0.042	Janamba Muk Muk Mugalimba	WHNT Maningrida Bawinanga Liverpool Rv Blyth Rv	Janamba Muk Muk Mugalimba_WHNT Maningrida Bawinanga Liverpool Rv Blyth Rv	0.741367	1	448.948
61425	CP0233	CP0020	0.0604643	-0.0392835	Janamba Muk Muk Mugalimba	WHNT Maningrida Bawinanga Liverpool Rv Blyth Rv	Janamba Muk Muk Mugalimba_WHNT Maningrida Bawinanga Liverpool Rv Blyth Rv	0.751665	1	448.948
65228	CP0238	CP0171	0.0623532	-0.0337131	Janamba Muk Muk Mugalimba	WHNT Maningrida Bawinanga Liverpool Rv Blyth Rv	Janamba Muk Muk Mugalimba_WHNT Maningrida Bawinanga Liverpool Rv Blyth Rv	0.749051	1	448.948
64152	CP0237	CP0191	0.0639823	-0.0325885	Janamba Muk Muk Mugalimba	WHNT Maningrida Bawinanga Liverpool Rv Blyth Rv	Janamba Muk Muk Mugalimba_WHNT Maningrida Bawinanga Liverpool Rv Blyth Rv	0.748483	1	448.948
61473	CP0233	CP0245	0.0600936	-0.0290515	Janamba Muk Muk Mugalimba	WHNT Maningrida Bawinanga Liverpool Rv Blyth Rv	Janamba Muk Muk Mugalimba_WHNT Maningrida Bawinanga Liverpool Rv Blyth Rv	0.757017	1	448.948
64128	CP0237	CP0171	0.0620626	-0.0285759	Janamba Muk Muk Mugalimba	WHNT Maningrida Bawinanga Liverpool Rv Blyth Rv	Janamba Muk Muk Mugalimba_WHNT Maningrida Bawinanga Liverpool Rv Blyth Rv	0.750368	1	448.948
65196	CP0238	CP0340	0.0605951	-0.0285101	Janamba Muk Muk Mugalimba	WHNT Maningrida Bawinanga Liverpool Rv Blyth Rv	Janamba Muk Muk Mugalimba_WHNT Maningrida Bawinanga Liverpool Rv Blyth Rv	0.749684	1	448.948
64142	CP0237	CP0329	0.0621752	-0.0271875	Janamba Muk Muk Mugalimba	WHNT Maningrida Bawinanga Liverpool Rv Blyth Rv	Janamba Muk Muk Mugalimba_WHNT Maningrida Bawinanga Liverpool Rv Blyth Rv	0.749072	1	448.948
64164	CP0237	CP0245	0.0621107	-0.0261934	Janamba Muk Muk Mugalimba	WHNT Maningrida Bawinanga Liverpool Rv Blyth Rv	Janamba Muk Muk Mugalimba_WHNT Maningrida Bawinanga Liverpool Rv Blyth Rv	0.751099	1	448.948
61472	CP0233	CP0037	0.0566751	-0.024796	Janamba Muk Muk Mugalimba	WHNT Maningrida Bawinanga Liverpool Rv Blyth Rv	Janamba Muk Muk Mugalimba_WHNT Maningrida Bawinanga Liverpool Rv Blyth Rv	0.755847	1	448.948
65263	CP0238	CP0037	0.057184	-0.024663	Janamba Muk Muk Mugalimba	WHNT Maningrida Bawinanga Liverpool Rv Blyth Rv	Janamba Muk Muk Mugalimba_WHNT Maningrida Bawinanga Liverpool Rv Blyth Rv	0.749236	1	448.948
64096	CP0237	CP0340	0.0633958	-0.0221119	Janamba Muk Muk Mugalimba	WHNT Maningrida Bawinanga Liverpool Rv Blyth Rv	Janamba Muk Muk Mugalimba_WHNT Maningrida Bawinanga Liverpool Rv Blyth Rv	0.744487	1	448.948
65264	CP0238	CP0245	0.0552059	-0.00842009	Janamba Muk Muk Mugalimba	WHNT Maningrida Bawinanga Liverpool Rv Blyth Rv	Janamba Muk Muk Mugalimba_WHNT Maningrida Bawinanga Liverpool Rv Blyth Rv	0.756609	1	448.948
65216	CP0238	CP0020	0.0570144	-0.00506135	Janamba Muk Muk Mugalimba	WHNT Maningrida Bawinanga Liverpool Rv Blyth Rv	Janamba Muk Muk Mugalimba_WHNT Maningrida Bawinanga Liverpool Rv Blyth Rv	0.760881	1	448.948
64163	CP0237	CP0037	0.057347	-0.00465465	Janamba Muk Muk Mugalimba	WHNT Maningrida Bawinanga Liverpool Rv Blyth Rv	Janamba Muk Muk Mugalimba_WHNT Maningrida Bawinanga Liverpool Rv Blyth Rv	0.74945	1	448.948
65275	CP0238	CP0253	0.0532278	-0.00352113	Janamba Muk Muk Mugalimba	WHNT Maningrida Bawinanga Liverpool Rv Blyth Rv	Janamba Muk Muk Mugalimba_WHNT Maningrida Bawinanga Liverpool Rv Blyth Rv	0.757508	1	448.948
64139	CP0237	CP0033	0.0582845	0.00015024	Janamba Muk Muk Mugalimba	WHNT Maningrida Bawinanga Liverpool Rv Blyth Rv	Janamba Muk Muk Mugalimba_WHNT Maningrida Bawinanga Liverpool Rv Blyth Rv	0.753391	1	448.948
65239	CP0238	CP0033	0.0534365	0.00275904	Janamba Muk Muk Mugalimba	WHNT Maningrida Bawinanga Liverpool Rv Blyth Rv	Janamba Muk Muk Mugalimba_WHNT Maningrida Bawinanga Liverpool Rv Blyth Rv	0.761605	1	448.948
64175	CP0237	CP0253	0.0540491	0.00540541	Janamba Muk Muk Mugalimba	WHNT Maningrida Bawinanga Liverpool Rv Blyth Rv	Janamba Muk Muk Mugalimba_WHNT Maningrida Bawinanga Liverpool Rv Blyth Rv	0.75229	1	448.948
64116	CP0237	CP0020	0.0536728	0.0147147	Janamba Muk Muk Mugalimba	WHNT Maningrida Bawinanga Liverpool Rv Blyth Rv	Janamba Muk Muk Mugalimba_WHNT Maningrida Bawinanga Liverpool Rv Blyth Rv	0.757648	1	448.948
54179	CP0239	CP0054	0.0932633	-0.217719	Janamba Muk Muk Mugalimba	WHNT Tiwi Islands	Janamba Muk Muk Mugalimba_WHNT Tiwi Islands	0.730895	0	169.552
59871	CP0225	CP0256	0.077619	-0.203406	Janamba Muk Muk Mugalimba	WHNT Tiwi Islands	Janamba Muk Muk Mugalimba_WHNT Tiwi Islands	0.752578	0	169.552
58030	CP0220	CP0021	0.082068	-0.199525	Janamba Muk Muk Mugalimba	WHNT Tiwi Islands	Janamba Muk Muk Mugalimba_WHNT Tiwi Islands	0.736352	0	169.552
54341	CP0239	CP0256	0.0811888	-0.195098	Janamba Muk Muk Mugalimba	WHNT Tiwi Islands	Janamba Muk Muk Mugalimba_WHNT Tiwi Islands	0.759967	0	169.552
58078	CP0220	CP0248	0.0824724	-0.189194	Janamba Muk Muk Mugalimba	WHNT Tiwi Islands	Janamba Muk Muk Mugalimba_WHNT Tiwi Islands	0.741436	0	169.552
54258	CP0239	CP0021	0.0839072	-0.187679	Janamba Muk Muk Mugalimba	WHNT Tiwi Islands	Janamba Muk Muk Mugalimba_WHNT Tiwi Islands	0.735955	0	169.552
65276	CP0238	CP0256	0.0703971	-0.181942	Janamba Muk Muk Mugalimba	WHNT Tiwi Islands	Janamba Muk Muk Mugalimba_WHNT Tiwi Islands	0.754783	0	169.552
54180	CP0239	CP0167	0.0809834	-0.178266	Janamba Muk Muk Mugalimba	WHNT Tiwi Islands	Janamba Muk Muk Mugalimba_WHNT Tiwi Islands	0.737437	0	169.552
54191	CP0239	CP0056	0.0825804	-0.177857	Janamba Muk Muk Mugalimba	WHNT Tiwi Islands	Janamba Muk Muk Mugalimba_WHNT Tiwi Islands	0.73961	0	169.552
54239	CP0239	CP0069	0.0819613	-0.175806	Janamba Muk Muk Mugalimba	WHNT Tiwi Islands	Janamba Muk Muk Mugalimba_WHNT Tiwi Islands	0.740818	0	169.552
54310	CP0239	CP0265	0.0804411	-0.170714	Janamba Muk Muk Mugalimba	WHNT Tiwi Islands	Janamba Muk Muk Mugalimba_WHNT Tiwi Islands	0.740962	0	169.552
54190	CP0239	CP0038	0.0804702	-0.170114	Janamba Muk Muk Mugalimba	WHNT Tiwi Islands	Janamba Muk Muk Mugalimba_WHNT Tiwi Islands	0.740687	0	169.552
58105	CP0220	CP0279	0.0724088	-0.169042	Janamba Muk Muk Mugalimba	WHNT Tiwi Islands	Janamba Muk Muk Mugalimba_WHNT Tiwi Islands	0.741874	0	169.552
57976	CP0220	CP0178	0.0746753	-0.167946	Janamba Muk Muk Mugalimba	WHNT Tiwi Islands	Janamba Muk Muk Mugalimba_WHNT Tiwi Islands	0.74504	0	169.552
54249	CP0239	CP0050	0.0795146	-0.167742	Janamba Muk Muk Mugalimba	WHNT Tiwi Islands	Janamba Muk Muk Mugalimba_WHNT Tiwi Islands	0.742076	0	169.552
58043	CP0220	CP0192	0.076462	-0.166911	Janamba Muk Muk Mugalimba	WHNT Tiwi Islands	Janamba Muk Muk Mugalimba_WHNT Tiwi Islands	0.746277	0	169.552
54215	CP0239	CP0067	0.0780939	-0.166307	Janamba Muk Muk Mugalimba	WHNT Tiwi Islands	Janamba Muk Muk Mugalimba_WHNT Tiwi Islands	0.741982	0	169.552
58094	CP0220	CP0266	0.0738534	-0.165996	Janamba Muk Muk Mugalimba	WHNT Tiwi Islands	Janamba Muk Muk Mugalimba_WHNT Tiwi Islands	0.745305	0	169.552
64176	CP0237	CP0256	0.0673165	-0.165741	Janamba Muk Muk Mugalimba	WHNT Tiwi Islands	Janamba Muk Muk Mugalimba_WHNT Tiwi Islands	0.758507	0	169.552
54287	CP0239	CP0261	0.080181	-0.165179	Janamba Muk Muk Mugalimba	WHNT Tiwi Islands	Janamba Muk Muk Mugalimba_WHNT Tiwi Islands	0.743077	0	169.552
58031	CP0220	CP0189	0.0712868	-0.163067	Janamba Muk Muk Mugalimba	WHNT Tiwi Islands	Janamba Muk Muk Mugalimba_WHNT Tiwi Islands	0.74436	0	169.552
58090	CP0220	CP0249	0.0775784	-0.162252	Janamba Muk Muk Mugalimba	WHNT Tiwi Islands	Janamba Muk Muk Mugalimba_WHNT Tiwi Islands	0.751314	0	169.552
58113	CP0220	CP0256	0.0737261	-0.16203	Janamba Muk Muk Mugalimba	WHNT Tiwi Islands	Janamba Muk Muk Mugalimba_WHNT Tiwi Islands	0.768432	0	169.552
58011	CP0220	CP0069	0.0717893	-0.16142	Janamba Muk Muk Mugalimba	WHNT Tiwi Islands	Janamba Muk Muk Mugalimba_WHNT Tiwi Islands	0.745851	0	169.552
58066	CP0220	CP0195	0.0741813	-0.160374	Janamba Muk Muk Mugalimba	WHNT Tiwi Islands	Janamba Muk Muk Mugalimba_WHNT Tiwi Islands	0.748236	0	169.552
58047	CP0220	CP0260	0.0741877	-0.160256	Janamba Muk Muk Mugalimba	WHNT Tiwi Islands	Janamba Muk Muk Mugalimba_WHNT Tiwi Islands	0.748827	0	169.552
54204	CP0239	CP0178	0.0779667	-0.16005	Janamba Muk Muk Mugalimba	WHNT Tiwi Islands	Janamba Muk Muk Mugalimba_WHNT Tiwi Islands	0.744121	0	169.552
54264	CP0239	CP0287	0.0814586	-0.159384	Janamba Muk Muk Mugalimba	WHNT Tiwi Islands	Janamba Muk Muk Mugalimba_WHNT Tiwi Islands	0.74746	0	169.552
54306	CP0239	CP0248	0.0779858	-0.159107	Janamba Muk Muk Mugalimba	WHNT Tiwi Islands	Janamba Muk Muk Mugalimba_WHNT Tiwi Islands	0.745137	0	169.552
58022	CP0220	CP0073	0.0733862	-0.15851	Janamba Muk Muk Mugalimba	WHNT Tiwi Islands	Janamba Muk Muk Mugalimba_WHNT Tiwi Islands	0.748287	0	169.552
58059	CP0220	CP0261	0.0747292	-0.157895	Janamba Muk Muk Mugalimba	WHNT Tiwi Islands	Janamba Muk Muk Mugalimba_WHNT Tiwi Islands	0.749819	0	169.552
57986	CP0220	CP0041	0.0720721	-0.156866	Janamba Muk Muk Mugalimba	WHNT Tiwi Islands	Janamba Muk Muk Mugalimba_WHNT Tiwi Islands	0.748018	0	169.552
58000	CP0220	CP0188	0.0733117	-0.153184	Janamba Muk Muk Mugalimba	WHNT Tiwi Islands	Janamba Muk Muk Mugalimba_WHNT Tiwi Islands	0.751083	0	169.552
54294	CP0239	CP0195	0.077314	-0.153087	Janamba Muk Muk Mugalimba	WHNT Tiwi Islands	Janamba Muk Muk Mugalimba_WHNT Tiwi Islands	0.747096	0	169.552
58036	CP0220	CP0287	0.0709246	-0.152493	Janamba Muk Muk Mugalimba	WHNT Tiwi Islands	Janamba Muk Muk Mugalimba_WHNT Tiwi Islands	0.748869	0	169.552
54333	CP0239	CP0279	0.0751403	-0.151824	Janamba Muk Muk Mugalimba	WHNT Tiwi Islands	Janamba Muk Muk Mugalimba_WHNT Tiwi Islands	0.745157	0	169.552
62853	CP0236	CP0069	0.0806247	-0.151411	Janamba Muk Muk Mugalimba	WHNT Tiwi Islands	Janamba Muk Muk Mugalimba_WHNT Tiwi Islands	0.73688	0	169.552
57987	CP0220	CP0067	0.0715318	-0.150878	Janamba Muk Muk Mugalimba	WHNT Tiwi Islands	Janamba Muk Muk Mugalimba_WHNT Tiwi Islands	0.75009	0	169.552
58082	CP0220	CP0265	0.074261	-0.148757	Janamba Muk Muk Mugalimba	WHNT Tiwi Islands	Janamba Muk Muk Mugalimba_WHNT Tiwi Islands	0.754326	0	169.552
54214	CP0239	CP0041	0.076798	-0.14875	Janamba Muk Muk Mugalimba	WHNT Tiwi Islands	Janamba Muk Muk Mugalimba_WHNT Tiwi Islands	0.748554	0	169.552
54259	CP0239	CP0189	0.0709502	-0.148102	Janamba Muk Muk Mugalimba	WHNT Tiwi Islands	Janamba Muk Muk Mugalimba_WHNT Tiwi Islands	0.743439	0	169.552
54330	CP0239	CP0254	0.0719971	-0.147573	Janamba Muk Muk Mugalimba	WHNT Tiwi Islands	Janamba Muk Muk Mugalimba_WHNT Tiwi Islands	0.743759	0	169.552
57998	CP0220	CP0048	0.0726156	-0.147328	Janamba Muk Muk Mugalimba	WHNT Tiwi Islands	Janamba Muk Muk Mugalimba_WHNT Tiwi Islands	0.753161	0	169.552
54322	CP0239	CP0266	0.0725923	-0.146206	Janamba Muk Muk Mugalimba	WHNT Tiwi Islands	Janamba Muk Muk Mugalimba_WHNT Tiwi Islands	0.745746	0	169.552
62955	CP0236	CP0256	0.0654903	-0.143898	Janamba Muk Muk Mugalimba	WHNT Tiwi Islands	Janamba Muk Muk Mugalimba_WHNT Tiwi Islands	0.767964	0	169.552
62872	CP0236	CP0021	0.0782245	-0.143866	Janamba Muk Muk Mugalimba	WHNT Tiwi Islands	Janamba Muk Muk Mugalimba_WHNT Tiwi Islands	0.738312	0	169.552
57988	CP0220	CP0185	0.0672314	-0.143066	Janamba Muk Muk Mugalimba	WHNT Tiwi Islands	Janamba Muk Muk Mugalimba_WHNT Tiwi Islands	0.74964	0	169.552
54298	CP0239	CP0264	0.076144	-0.142755	Janamba Muk Muk Mugalimba	WHNT Tiwi Islands	Janamba Muk Muk Mugalimba_WHNT Tiwi Islands	0.750407	0	169.552
54271	CP0239	CP0192	0.0764888	-0.141398	Janamba Muk Muk Mugalimba	WHNT Tiwi Islands	Janamba Muk Muk Mugalimba_WHNT Tiwi Islands	0.750592	0	169.552
58010	CP0220	CP0049	0.0676285	-0.140899	Janamba Muk Muk Mugalimba	WHNT Tiwi Islands	Janamba Muk Muk Mugalimba_WHNT Tiwi Islands	0.751398	0	169.552
54275	CP0239	CP0260	0.0724113	-0.139943	Janamba Muk Muk Mugalimba	WHNT Tiwi Islands	Janamba Muk Muk Mugalimba_WHNT Tiwi Islands	0.748733	0	169.552
54238	CP0239	CP0049	0.0719971	-0.139427	Janamba Muk Muk Mugalimba	WHNT Tiwi Islands	Janamba Muk Muk Mugalimba_WHNT Tiwi Islands	0.749276	0	169.552
54226	CP0239	CP0048	0.0732017	-0.139227	Janamba Muk Muk Mugalimba	WHNT Tiwi Islands	Janamba Muk Muk Mugalimba_WHNT Tiwi Islands	0.749592	0	169.552
58021	CP0220	CP0050	0.0672087	-0.139173	Janamba Muk Muk Mugalimba	WHNT Tiwi Islands	Janamba Muk Muk Mugalimba_WHNT Tiwi Islands	0.751491	0	169.552
58035	CP0220	CP0258	0.0675578	-0.138605	Janamba Muk Muk Mugalimba	WHNT Tiwi Islands	Janamba Muk Muk Mugalimba_WHNT Tiwi Islands	0.751716	0	169.552
54216	CP0239	CP0185	0.0714027	-0.138233	Janamba Muk Muk Mugalimba	WHNT Tiwi Islands	Janamba Muk Muk Mugalimba_WHNT Tiwi Islands	0.748825	0	169.552
62920	CP0236	CP0248	0.0764599	-0.137197	Janamba Muk Muk Mugalimba	WHNT Tiwi Islands	Janamba Muk Muk Mugalimba_WHNT Tiwi Islands	0.74042	0	169.552
57974	CP0220	CP0039	0.072911	-0.135432	Janamba Muk Muk Mugalimba	WHNT Tiwi Islands	Janamba Muk Muk Mugalimba_WHNT Tiwi Islands	0.75961	0	169.552
54263	CP0239	CP0258	0.0699022	-0.134918	Janamba Muk Muk Mugalimba	WHNT Tiwi Islands	Janamba Muk Muk Mugalimba_WHNT Tiwi Islands	0.748189	0	169.552
58070	CP0220	CP0264	0.0701533	-0.132955	Janamba Muk Muk Mugalimba	WHNT Tiwi Islands	Janamba Muk Muk Mugalimba_WHNT Tiwi Islands	0.75807	0	169.552
54344	CP0239	CP0282	0.0695352	-0.131919	Janamba Muk Muk Mugalimba	WHNT Tiwi Islands	Janamba Muk Muk Mugalimba_WHNT Tiwi Islands	0.750363	0	169.552
62901	CP0236	CP0261	0.0752317	-0.128866	Janamba Muk Muk Mugalimba	WHNT Tiwi Islands	Janamba Muk Muk Mugalimba_WHNT Tiwi Islands	0.742686	0	169.552
54228	CP0239	CP0188	0.0717521	-0.128772	Janamba Muk Muk Mugalimba	WHNT Tiwi Islands	Janamba Muk Muk Mugalimba_WHNT Tiwi Islands	0.754575	0	169.552
54318	CP0239	CP0249	0.0718051	-0.127511	Janamba Muk Muk Mugalimba	WHNT Tiwi Islands	Janamba Muk Muk Mugalimba_WHNT Tiwi Islands	0.753772	0	169.552
54202	CP0239	CP0039	0.0738328	-0.125446	Janamba Muk Muk Mugalimba	WHNT Tiwi Islands	Janamba Muk Muk Mugalimba_WHNT Tiwi Islands	0.756696	0	169.552
58102	CP0220	CP0254	0.0638528	-0.12436	Janamba Muk Muk Mugalimba	WHNT Tiwi Islands	Janamba Muk Muk Mugalimba_WHNT Tiwi Islands	0.755952	0	169.552
61485	CP0233	CP0256	0.0592379	-0.124219	Janamba Muk Muk Mugalimba	WHNT Tiwi Islands	Janamba Muk Muk Mugalimba_WHNT Tiwi Islands	0.770634	0	169.552
62944	CP0236	CP0254	0.0686524	-0.123281	Janamba Muk Muk Mugalimba	WHNT Tiwi Islands	Janamba Muk Muk Mugalimba_WHNT Tiwi Islands	0.739466	0	169.552
62908	CP0236	CP0195	0.0736017	-0.123186	Janamba Muk Muk Mugalimba	WHNT Tiwi Islands	Janamba Muk Muk Mugalimba_WHNT Tiwi Islands	0.745036	0	169.552
54178	CP0239	CP0024	0.0699149	-0.122854	Janamba Muk Muk Mugalimba	WHNT Tiwi Islands	Janamba Muk Muk Mugalimba_WHNT Tiwi Islands	0.754483	0	169.552
58116	CP0220	CP0282	0.0653986	-0.122161	Janamba Muk Muk Mugalimba	WHNT Tiwi Islands	Janamba Muk Muk Mugalimba_WHNT Tiwi Islands	0.757699	0	169.552
54192	CP0239	CP0169	0.0687466	-0.122035	Janamba Muk Muk Mugalimba	WHNT Tiwi Islands	Janamba Muk Muk Mugalimba_WHNT Tiwi Islands	0.754852	0	169.552
54250	CP0239	CP0073	0.0701501	-0.121342	Janamba Muk Muk Mugalimba	WHNT Tiwi Islands	Janamba Muk Muk Mugalimba_WHNT Tiwi Islands	0.755379	0	169.552
54227	CP0239	CP0068	0.0720232	-0.120609	Janamba Muk Muk Mugalimba	WHNT Tiwi Islands	Janamba Muk Muk Mugalimba_WHNT Tiwi Islands	0.758686	0	169.552
57999	CP0220	CP0068	0.0667388	-0.118508	Janamba Muk Muk Mugalimba	WHNT Tiwi Islands	Janamba Muk Muk Mugalimba_WHNT Tiwi Islands	0.761724	0	169.552
59788	CP0225	CP0021	0.079095	-0.114677	Janamba Muk Muk Mugalimba	WHNT Tiwi Islands	Janamba Muk Muk Mugalimba_WHNT Tiwi Islands	0.734208	0	169.552
61402	CP0233	CP0021	0.079841	-0.113651	Janamba Muk Muk Mugalimba	WHNT Tiwi Islands	Janamba Muk Muk Mugalimba_WHNT Tiwi Islands	0.728233	0	169.552
62924	CP0236	CP0265	0.0696788	-0.113152	Janamba Muk Muk Mugalimba	WHNT Tiwi Islands	Janamba Muk Muk Mugalimba_WHNT Tiwi Islands	0.74569	0	169.552
65241	CP0238	CP0248	0.0718682	-0.111741	Janamba Muk Muk Mugalimba	WHNT Tiwi Islands	Janamba Muk Muk Mugalimba_WHNT Tiwi Islands	0.739862	0	169.552
61450	CP0233	CP0248	0.0682847	-0.111389	Janamba Muk Muk Mugalimba	WHNT Tiwi Islands	Janamba Muk Muk Mugalimba_WHNT Tiwi Islands	0.736732	0	169.552
54203	CP0239	CP0064	0.0655945	-0.109565	Janamba Muk Muk Mugalimba	WHNT Tiwi Islands	Janamba Muk Muk Mugalimba_WHNT Tiwi Islands	0.756957	0	169.552
62947	CP0236	CP0279	0.0728826	-0.108838	Janamba Muk Muk Mugalimba	WHNT Tiwi Islands	Janamba Muk Muk Mugalimba_WHNT Tiwi Islands	0.751091	0	169.552
62885	CP0236	CP0192	0.0756994	-0.108696	Janamba Muk Muk Mugalimba	WHNT Tiwi Islands	Janamba Muk Muk Mugalimba_WHNT Tiwi Islands	0.753154	0	169.552
58055	CP0220	CP0194	0.0635494	-0.108083	Janamba Muk Muk Mugalimba	WHNT Tiwi Islands	Janamba Muk Muk Mugalimba_WHNT Tiwi Islands	0.763405	0	169.552
57975	CP0220	CP0064	0.0602019	-0.107718	Janamba Muk Muk Mugalimba	WHNT Tiwi Islands	Janamba Muk Muk Mugalimba_WHNT Tiwi Islands	0.760725	0	169.552
62889	CP0236	CP0260	0.068884	-0.107708	Janamba Muk Muk Mugalimba	WHNT Tiwi Islands	Janamba Muk Muk Mugalimba_WHNT Tiwi Islands	0.74791	0	169.552
59836	CP0225	CP0248	0.0715064	-0.106187	Janamba Muk Muk Mugalimba	WHNT Tiwi Islands	Janamba Muk Muk Mugalimba_WHNT Tiwi Islands	0.742559	0	169.552
54283	CP0239	CP0194	0.0664614	-0.105225	Janamba Muk Muk Mugalimba	WHNT Tiwi Islands	Janamba Muk Muk Mugalimba_WHNT Tiwi Islands	0.760232	0	169.552
62873	CP0236	CP0189	0.065952	-0.100965	Janamba Muk Muk Mugalimba	WHNT Tiwi Islands	Janamba Muk Muk Mugalimba_WHNT Tiwi Islands	0.749092	0	169.552
62932	CP0236	CP0249	0.0700347	-0.0990696	Janamba Muk Muk Mugalimba	WHNT Tiwi Islands	Janamba Muk Muk Mugalimba_WHNT Tiwi Islands	0.752964	0	169.552
59817	CP0225	CP0261	0.0742816	-0.09868	Janamba Muk Muk Mugalimba	WHNT Tiwi Islands	Janamba Muk Muk Mugalimba_WHNT Tiwi Islands	0.738207	0	169.552
62936	CP0236	CP0266	0.0672605	-0.0968019	Janamba Muk Muk Mugalimba	WHNT Tiwi Islands	Janamba Muk Muk Mugalimba_WHNT Tiwi Islands	0.751772	0	169.552
62878	CP0236	CP0287	0.0702968	-0.0954921	Janamba Muk Muk Mugalimba	WHNT Tiwi Islands	Janamba Muk Muk Mugalimba_WHNT Tiwi Islands	0.755145	0	169.552
62863	CP0236	CP0050	0.0647273	-0.092223	Janamba Muk Muk Mugalimba	WHNT Tiwi Islands	Janamba Muk Muk Mugalimba_WHNT Tiwi Islands	0.751818	0	169.552
64141	CP0237	CP0248	0.0669618	-0.0912807	Janamba Muk Muk Mugalimba	WHNT Tiwi Islands	Janamba Muk Muk Mugalimba_WHNT Tiwi Islands	0.746726	0	169.552
62958	CP0236	CP0282	0.0645044	-0.0901103	Janamba Muk Muk Mugalimba	WHNT Tiwi Islands	Janamba Muk Muk Mugalimba_WHNT Tiwi Islands	0.75246	0	169.552
59768	CP0225	CP0049	0.0693516	-0.0900322	Janamba Muk Muk Mugalimba	WHNT Tiwi Islands	Janamba Muk Muk Mugalimba_WHNT Tiwi Islands	0.737945	0	169.552
61383	CP0233	CP0069	0.0737335	-0.0879484	Janamba Muk Muk Mugalimba	WHNT Tiwi Islands	Janamba Muk Muk Mugalimba_WHNT Tiwi Islands	0.736885	0	169.552
59745	CP0225	CP0067	0.0685601	-0.0879032	Janamba Muk Muk Mugalimba	WHNT Tiwi Islands	Janamba Muk Muk Mugalimba_WHNT Tiwi Islands	0.738875	0	169.552
62864	CP0236	CP0073	0.0655291	-0.0860825	Janamba Muk Muk Mugalimba	WHNT Tiwi Islands	Janamba Muk Muk Mugalimba_WHNT Tiwi Islands	0.755945	0	169.552
59769	CP0225	CP0069	0.0720737	-0.0855305	Janamba Muk Muk Mugalimba	WHNT Tiwi Islands	Janamba Muk Muk Mugalimba_WHNT Tiwi Islands	0.743136	0	169.552
62877	CP0236	CP0258	0.0652727	-0.0854539	Janamba Muk Muk Mugalimba	WHNT Tiwi Islands	Janamba Muk Muk Mugalimba_WHNT Tiwi Islands	0.755727	0	169.552
62852	CP0236	CP0049	0.0660977	-0.0833333	Janamba Muk Muk Mugalimba	WHNT Tiwi Islands	Janamba Muk Muk Mugalimba_WHNT Tiwi Islands	0.758489	0	169.552
61431	CP0233	CP0261	0.0726912	-0.0827032	Janamba Muk Muk Mugalimba	WHNT Tiwi Islands	Janamba Muk Muk Mugalimba_WHNT Tiwi Islands	0.739087	0	169.552
61415	CP0233	CP0192	0.0711434	-0.0826772	Janamba Muk Muk Mugalimba	WHNT Tiwi Islands	Janamba Muk Muk Mugalimba_WHNT Tiwi Islands	0.74882	0	169.552
61477	CP0233	CP0279	0.0707326	-0.0811872	Janamba Muk Muk Mugalimba	WHNT Tiwi Islands	Janamba Muk Muk Mugalimba_WHNT Tiwi Islands	0.736828	0	169.552
59801	CP0225	CP0192	0.0701946	-0.0788348	Janamba Muk Muk Mugalimba	WHNT Tiwi Islands	Janamba Muk Muk Mugalimba_WHNT Tiwi Islands	0.750409	0	169.552
59805	CP0225	CP0260	0.068872	-0.0787781	Janamba Muk Muk Mugalimba	WHNT Tiwi Islands	Janamba Muk Muk Mugalimba_WHNT Tiwi Islands	0.743492	0	169.552
61462	CP0233	CP0249	0.0664855	-0.077807	Janamba Muk Muk Mugalimba	WHNT Tiwi Islands	Janamba Muk Muk Mugalimba_WHNT Tiwi Islands	0.747645	0	169.552
61442	CP0233	CP0264	0.0648766	-0.0755814	Janamba Muk Muk Mugalimba	WHNT Tiwi Islands	Janamba Muk Muk Mugalimba_WHNT Tiwi Islands	0.752658	0	169.552
59824	CP0225	CP0195	0.069759	-0.0751771	Janamba Muk Muk Mugalimba	WHNT Tiwi Islands	Janamba Muk Muk Mugalimba_WHNT Tiwi Islands	0.746059	0	169.552
62912	CP0236	CP0264	0.0640886	-0.0730743	Janamba Muk Muk Mugalimba	WHNT Tiwi Islands	Janamba Muk Muk Mugalimba_WHNT Tiwi Islands	0.761529	0	169.552
64106	CP0237	CP0192	0.0683792	-0.0705214	Janamba Muk Muk Mugalimba	WHNT Tiwi Islands	Janamba Muk Muk Mugalimba_WHNT Tiwi Islands	0.752911	0	169.552
61438	CP0233	CP0195	0.0692586	-0.0704159	Janamba Muk Muk Mugalimba	WHNT Tiwi Islands	Janamba Muk Muk Mugalimba_WHNT Tiwi Islands	0.741863	0	169.552
65193	CP0238	CP0021	0.0707709	-0.0677278	Janamba Muk Muk Mugalimba	WHNT Tiwi Islands	Janamba Muk Muk Mugalimba_WHNT Tiwi Islands	0.742372	0	169.552
61474	CP0233	CP0254	0.0648882	-0.0672111	Janamba Muk Muk Mugalimba	WHNT Tiwi Islands	Janamba Muk Muk Mugalimba_WHNT Tiwi Islands	0.739366	0	169.552
65253	CP0238	CP0249	0.0624774	-0.0666448	Janamba Muk Muk Mugalimba	WHNT Tiwi Islands	Janamba Muk Muk Mugalimba_WHNT Tiwi Islands	0.749909	0	169.552
59840	CP0225	CP0265	0.0678578	-0.064791	Janamba Muk Muk Mugalimba	WHNT Tiwi Islands	Janamba Muk Muk Mugalimba_WHNT Tiwi Islands	0.750857	0	169.552
59863	CP0225	CP0279	0.0699693	-0.0645525	Janamba Muk Muk Mugalimba	WHNT Tiwi Islands	Janamba Muk Muk Mugalimba_WHNT Tiwi Islands	0.752938	0	169.552
61408	CP0233	CP0287	0.0650877	-0.0639648	Janamba Muk Muk Mugalimba	WHNT Tiwi Islands	Janamba Muk Muk Mugalimba_WHNT Tiwi Islands	0.751853	0	169.552
59828	CP0225	CP0264	0.063922	-0.0631649	Janamba Muk Muk Mugalimba	WHNT Tiwi Islands	Janamba Muk Muk Mugalimba_WHNT Tiwi Islands	0.758035	0	169.552
59852	CP0225	CP0266	0.0658109	-0.0630631	Janamba Muk Muk Mugalimba	WHNT Tiwi Islands	Janamba Muk Muk Mugalimba_WHNT Tiwi Islands	0.749412	0	169.552
64099	CP0237	CP0287	0.0642489	-0.0629568	Janamba Muk Muk Mugalimba	WHNT Tiwi Islands	Janamba Muk Muk Mugalimba_WHNT Tiwi Islands	0.752301	0	169.552
59789	CP0225	CP0189	0.066498	-0.0628222	Janamba Muk Muk Mugalimba	WHNT Tiwi Islands	Janamba Muk Muk Mugalimba_WHNT Tiwi Islands	0.750813	0	169.552
61466	CP0233	CP0266	0.0651389	-0.0625393	Janamba Muk Muk Mugalimba	WHNT Tiwi Islands	Janamba Muk Muk Mugalimba_WHNT Tiwi Islands	0.742151	0	169.552
61419	CP0233	CP0260	0.0667509	-0.0623426	Janamba Muk Muk Mugalimba	WHNT Tiwi Islands	Janamba Muk Muk Mugalimba_WHNT Tiwi Islands	0.744543	0	169.552
64133	CP0237	CP0264	0.0622133	-0.0616162	Janamba Muk Muk Mugalimba	WHNT Tiwi Islands	Janamba Muk Muk Mugalimba_WHNT Tiwi Islands	0.756102	0	169.552
64093	CP0237	CP0021	0.0665564	-0.0613088	Janamba Muk Muk Mugalimba	WHNT Tiwi Islands	Janamba Muk Muk Mugalimba_WHNT Tiwi Islands	0.74168	0	169.552
61454	CP0233	CP0265	0.0662824	-0.0612822	Janamba Muk Muk Mugalimba	WHNT Tiwi Islands	Janamba Muk Muk Mugalimba_WHNT Tiwi Islands	0.744597	0	169.552
65206	CP0238	CP0192	0.0651188	-0.0604918	Janamba Muk Muk Mugalimba	WHNT Tiwi Islands	Janamba Muk Muk Mugalimba_WHNT Tiwi Islands	0.755034	0	169.552
59794	CP0225	CP0287	0.0664855	-0.0592363	Janamba Muk Muk Mugalimba	WHNT Tiwi Islands	Janamba Muk Muk Mugalimba_WHNT Tiwi Islands	0.756069	0	169.552
65199	CP0238	CP0287	0.0637875	-0.0564411	Janamba Muk Muk Mugalimba	WHNT Tiwi Islands	Janamba Muk Muk Mugalimba_WHNT Tiwi Islands	0.754698	0	169.552
59780	CP0225	CP0073	0.0651742	-0.0561816	Janamba Muk Muk Mugalimba	WHNT Tiwi Islands	Janamba Muk Muk Mugalimba_WHNT Tiwi Islands	0.753295	0	169.552
65210	CP0238	CP0260	0.0686982	-0.0561538	Janamba Muk Muk Mugalimba	WHNT Tiwi Islands	Janamba Muk Muk Mugalimba_WHNT Tiwi Islands	0.742788	0	169.552
59744	CP0225	CP0041	0.0669433	-0.0549486	Janamba Muk Muk Mugalimba	WHNT Tiwi Islands	Janamba Muk Muk Mugalimba_WHNT Tiwi Islands	0.755323	0	169.552
59848	CP0225	CP0249	0.0649728	-0.0548058	Janamba Muk Muk Mugalimba	WHNT Tiwi Islands	Janamba Muk Muk Mugalimba_WHNT Tiwi Islands	0.759074	0	169.552
62897	CP0236	CP0194	0.0568987	-0.052921	Janamba Muk Muk Mugalimba	WHNT Tiwi Islands	Janamba Muk Muk Mugalimba_WHNT Tiwi Islands	0.764406	0	169.552
61372	CP0233	CP0188	0.0655471	-0.0523885	Janamba Muk Muk Mugalimba	WHNT Tiwi Islands	Janamba Muk Muk Mugalimba_WHNT Tiwi Islands	0.752347	0	169.552
61394	CP0233	CP0073	0.0666667	-0.0515497	Janamba Muk Muk Mugalimba	WHNT Tiwi Islands	Janamba Muk Muk Mugalimba_WHNT Tiwi Islands	0.752432	0	169.552
61371	CP0233	CP0068	0.0658132	-0.0497489	Janamba Muk Muk Mugalimba	WHNT Tiwi Islands	Janamba Muk Muk Mugalimba_WHNT Tiwi Islands	0.75	0	169.552
59758	CP0225	CP0188	0.064592	-0.0494186	Janamba Muk Muk Mugalimba	WHNT Tiwi Islands	Janamba Muk Muk Mugalimba_WHNT Tiwi Islands	0.75683	0	169.552
59860	CP0225	CP0254	0.0643064	-0.0490985	Janamba Muk Muk Mugalimba	WHNT Tiwi Islands	Janamba Muk Muk Mugalimba_WHNT Tiwi Islands	0.756232	0	169.552
59746	CP0225	CP0185	0.0617329	-0.0490354	Janamba Muk Muk Mugalimba	WHNT Tiwi Islands	Janamba Muk Muk Mugalimba_WHNT Tiwi Islands	0.75352	0	169.552
64168	CP0237	CP0279	0.0681609	-0.0475374	Janamba Muk Muk Mugalimba	WHNT Tiwi Islands	Janamba Muk Muk Mugalimba_WHNT Tiwi Islands	0.745453	0	169.552
64129	CP0237	CP0195	0.0655617	-0.0469735	Janamba Muk Muk Mugalimba	WHNT Tiwi Islands	Janamba Muk Muk Mugalimba_WHNT Tiwi Islands	0.746041	0	169.552
61407	CP0233	CP0258	0.0628159	-0.0451826	Janamba Muk Muk Mugalimba	WHNT Tiwi Islands	Janamba Muk Muk Mugalimba_WHNT Tiwi Islands	0.750271	0	169.552
64153	CP0237	CP0249	0.0564159	-0.0446369	Janamba Muk Muk Mugalimba	WHNT Tiwi Islands	Janamba Muk Muk Mugalimba_WHNT Tiwi Islands	0.754978	0	169.552
61403	CP0233	CP0189	0.0631199	-0.0439232	Janamba Muk Muk Mugalimba	WHNT Tiwi Islands	Janamba Muk Muk Mugalimba_WHNT Tiwi Islands	0.751578	0	169.552
65257	CP0238	CP0266	0.064202	-0.0436998	Janamba Muk Muk Mugalimba	WHNT Tiwi Islands	Janamba Muk Muk Mugalimba_WHNT Tiwi Islands	0.746709	0	169.552
65222	CP0238	CP0261	0.0648999	-0.042563	Janamba Muk Muk Mugalimba	WHNT Tiwi Islands	Janamba Muk Muk Mugalimba_WHNT Tiwi Islands	0.74662	0	169.552
59779	CP0225	CP0050	0.0625904	-0.0415325	Janamba Muk Muk Mugalimba	WHNT Tiwi Islands	Janamba Muk Muk Mugalimba_WHNT Tiwi Islands	0.758321	0	169.552
59757	CP0225	CP0068	0.0641373	-0.0414791	Janamba Muk Muk Mugalimba	WHNT Tiwi Islands	Janamba Muk Muk Mugalimba_WHNT Tiwi Islands	0.759892	0	169.552
59756	CP0225	CP0048	0.0600579	-0.0409149	Janamba Muk Muk Mugalimba	WHNT Tiwi Islands	Janamba Muk Muk Mugalimba_WHNT Tiwi Islands	0.756331	0	169.552
61370	CP0233	CP0048	0.0584943	-0.0394654	Janamba Muk Muk Mugalimba	WHNT Tiwi Islands	Janamba Muk Muk Mugalimba_WHNT Tiwi Islands	0.748781	0	169.552
65229	CP0238	CP0195	0.0647027	-0.0392308	Janamba Muk Muk Mugalimba	WHNT Tiwi Islands	Janamba Muk Muk Mugalimba_WHNT Tiwi Islands	0.747967	0	169.552
64084	CP0237	CP0050	0.0652454	-0.0381488	Janamba Muk Muk Mugalimba	WHNT Tiwi Islands	Janamba Muk Muk Mugalimba_WHNT Tiwi Islands	0.748943	0	169.552
61382	CP0233	CP0049	0.0589402	-0.0380743	Janamba Muk Muk Mugalimba	WHNT Tiwi Islands	Janamba Muk Muk Mugalimba_WHNT Tiwi Islands	0.750721	0	169.552
64085	CP0237	CP0073	0.0623739	-0.0376049	Janamba Muk Muk Mugalimba	WHNT Tiwi Islands	Janamba Muk Muk Mugalimba_WHNT Tiwi Islands	0.756834	0	169.552
61488	CP0233	CP0282	0.0608255	-0.0373581	Janamba Muk Muk Mugalimba	WHNT Tiwi Islands	Janamba Muk Muk Mugalimba_WHNT Tiwi Islands	0.752263	0	169.552
65265	CP0238	CP0254	0.0594595	-0.0357143	Janamba Muk Muk Mugalimba	WHNT Tiwi Islands	Janamba Muk Muk Mugalimba_WHNT Tiwi Islands	0.744595	0	169.552
65245	CP0238	CP0265	0.0649865	-0.034488	Janamba Muk Muk Mugalimba	WHNT Tiwi Islands	Janamba Muk Muk Mugalimba_WHNT Tiwi Islands	0.751125	0	169.552
59793	CP0225	CP0258	0.0594937	-0.0343106	Janamba Muk Muk Mugalimba	WHNT Tiwi Islands	Janamba Muk Muk Mugalimba_WHNT Tiwi Islands	0.759584	0	169.552
65233	CP0238	CP0264	0.0585375	-0.0335548	Janamba Muk Muk Mugalimba	WHNT Tiwi Islands	Janamba Muk Muk Mugalimba_WHNT Tiwi Islands	0.769272	0	169.552
61393	CP0233	CP0050	0.0606498	-0.0307183	Janamba Muk Muk Mugalimba	WHNT Tiwi Islands	Janamba Muk Muk Mugalimba_WHNT Tiwi Islands	0.756588	0	169.552
64157	CP0237	CP0266	0.0626608	-0.0287555	Janamba Muk Muk Mugalimba	WHNT Tiwi Islands	Janamba Muk Muk Mugalimba_WHNT Tiwi Islands	0.753491	0	169.552
59874	CP0225	CP0282	0.0585782	-0.0276883	Janamba Muk Muk Mugalimba	WHNT Tiwi Islands	Janamba Muk Muk Mugalimba_WHNT Tiwi Islands	0.761335	0	169.552
59813	CP0225	CP0194	0.058026	-0.0249356	Janamba Muk Muk Mugalimba	WHNT Tiwi Islands	Janamba Muk Muk Mugalimba_WHNT Tiwi Islands	0.763106	0	169.552
65194	CP0238	CP0189	0.0616438	-0.0236196	Janamba Muk Muk Mugalimba	WHNT Tiwi Islands	Janamba Muk Muk Mugalimba_WHNT Tiwi Islands	0.753965	0	169.552
65198	CP0238	CP0258	0.0577305	-0.021639	Janamba Muk Muk Mugalimba	WHNT Tiwi Islands	Janamba Muk Muk Mugalimba_WHNT Tiwi Islands	0.751128	0	169.552
65268	CP0238	CP0279	0.0589614	-0.0210252	Janamba Muk Muk Mugalimba	WHNT Tiwi Islands	Janamba Muk Muk Mugalimba_WHNT Tiwi Islands	0.752885	0	169.552
64122	CP0237	CP0261	0.0591368	-0.0196998	Janamba Muk Muk Mugalimba	WHNT Tiwi Islands	Janamba Muk Muk Mugalimba_WHNT Tiwi Islands	0.753903	0	169.552
61427	CP0233	CP0194	0.0564778	-0.0193897	Janamba Muk Muk Mugalimba	WHNT Tiwi Islands	Janamba Muk Muk Mugalimba_WHNT Tiwi Islands	0.761638	0	169.552
64094	CP0237	CP0189	0.0618803	-0.0159542	Janamba Muk Muk Mugalimba	WHNT Tiwi Islands	Janamba Muk Muk Mugalimba_WHNT Tiwi Islands	0.756059	0	169.552
64098	CP0237	CP0258	0.0586182	-0.0158879	Janamba Muk Muk Mugalimba	WHNT Tiwi Islands	Janamba Muk Muk Mugalimba_WHNT Tiwi Islands	0.754318	0	169.552
64110	CP0237	CP0260	0.0595041	-0.0150902	Janamba Muk Muk Mugalimba	WHNT Tiwi Islands	Janamba Muk Muk Mugalimba_WHNT Tiwi Islands	0.755464	0	169.552
64145	CP0237	CP0265	0.0607117	-0.0139808	Janamba Muk Muk Mugalimba	WHNT Tiwi Islands	Janamba Muk Muk Mugalimba_WHNT Tiwi Islands	0.747157	0	169.552
65218	CP0238	CP0194	0.0530207	-0.0122455	Janamba Muk Muk Mugalimba	WHNT Tiwi Islands	Janamba Muk Muk Mugalimba_WHNT Tiwi Islands	0.762579	0	169.552
64165	CP0237	CP0254	0.0591043	-0.00511432	Janamba Muk Muk Mugalimba	WHNT Tiwi Islands	Janamba Muk Muk Mugalimba_WHNT Tiwi Islands	0.750918	0	169.552
64118	CP0237	CP0194	0.0508911	-0.00275795	Janamba Muk Muk Mugalimba	WHNT Tiwi Islands	Janamba Muk Muk Mugalimba_WHNT Tiwi Islands	0.766213	0	169.552
65279	CP0238	CP0282	0.0508413	0.00661132	Janamba Muk Muk Mugalimba	WHNT Tiwi Islands	Janamba Muk Muk Mugalimba_WHNT Tiwi Islands	0.760539	0	169.552
64179	CP0237	CP0282	0.0571008	0.00668693	Janamba Muk Muk Mugalimba	WHNT Tiwi Islands	Janamba Muk Muk Mugalimba_WHNT Tiwi Islands	0.758151	0	169.552
57980	CP0220	CP0032	0.0664386	-0.119795	Janamba Muk Muk Mugalimba	WHNT Wagait Finniss River	Janamba Muk Muk Mugalimba_WHNT Wagait Finniss River	0.760893	0	13.615
57981	CP0220	CP0074	0.0680958	-0.103436	Janamba Muk Muk Mugalimba	WHNT Wagait Finniss River	Janamba Muk Muk Mugalimba_WHNT Wagait Finniss River	0.770672	0	13.615
54221	CP0239	CP0164	0.0628386	-0.089222	Janamba Muk Muk Mugalimba	WHNT Wagait Finniss River	Janamba Muk Muk Mugalimba_WHNT Wagait Finniss River	0.764717	0	13.615
57993	CP0220	CP0164	0.0579867	-0.0844891	Janamba Muk Muk Mugalimba	WHNT Wagait Finniss River	Janamba Muk Muk Mugalimba_WHNT Wagait Finniss River	0.769584	0	13.615
59751	CP0225	CP0164	0.0632889	-0.0494541	Janamba Muk Muk Mugalimba	WHNT Wagait Finniss River	Janamba Muk Muk Mugalimba_WHNT Wagait Finniss River	0.754778	0	13.615
54209	CP0239	CP0074	0.0567197	-0.0335714	Janamba Muk Muk Mugalimba	WHNT Wagait Finniss River	Janamba Muk Muk Mugalimba_WHNT Wagait Finniss River	0.78685	0	13.615
54208	CP0239	CP0032	0.0489346	-0.028174	Janamba Muk Muk Mugalimba	WHNT Wagait Finniss River	Janamba Muk Muk Mugalimba_WHNT Wagait Finniss River	0.78151	0	13.615
54184	CP0239	CP0029	0.0888407	-0.197321	Janamba Muk Muk Mugalimba	WHNT Welltree Station	Janamba Muk Muk Mugalimba_WHNT Welltree Station	0.736277	0	31.2053
69316	CP0240	CP0263	0.0890768	-0.336772	Janamba Swim Creek Station	WHNT King River Goomadeer River	Janamba Swim Creek Station_WHNT King River Goomadeer River	0.716844	1	220.156
69315	CP0240	CP0066	0.0926426	-0.313309	Janamba Swim Creek Station	WHNT King River Goomadeer River	Janamba Swim Creek Station_WHNT King River Goomadeer River	0.730977	1	220.156
69304	CP0240	CP0057	0.0920058	-0.309418	Janamba Swim Creek Station	WHNT King River Goomadeer River	Janamba Swim Creek Station_WHNT King River Goomadeer River	0.731455	1	220.156
67636	CP0226	CP0034	0.0970626	-0.241581	Janamba Swim Creek Station	WHNT King River Goomadeer River	Janamba Swim Creek Station_WHNT King River Goomadeer River	0.727422	1	220.156
68285	CP0227	CP0034	0.0935187	-0.230124	Janamba Swim Creek Station	WHNT King River Goomadeer River	Janamba Swim Creek Station_WHNT King River Goomadeer River	0.732082	1	220.156
66790	CP0224	CP0034	0.0876876	-0.208515	Janamba Swim Creek Station	WHNT King River Goomadeer River	Janamba Swim Creek Station_WHNT King River Goomadeer River	0.735672	1	220.156
68855	CP0228	CP0034	0.086627	-0.206601	Janamba Swim Creek Station	WHNT King River Goomadeer River	Janamba Swim Creek Station_WHNT King River Goomadeer River	0.736961	1	220.156
66793	CP0224	CP0331	0.0860819	-0.203521	Janamba Swim Creek Station	WHNT King River Goomadeer River	Janamba Swim Creek Station_WHNT King River Goomadeer River	0.723994	1	220.156
65800	CP0010	CP0034	0.0837706	-0.181602	Janamba Swim Creek Station	WHNT King River Goomadeer River	Janamba Swim Creek Station_WHNT King River Goomadeer River	0.746608	1	220.156
68288	CP0227	CP0331	0.0885228	-0.15846	Janamba Swim Creek Station	WHNT King River Goomadeer River	Janamba Swim Creek Station_WHNT King River Goomadeer River	0.727824	1	220.156
66825	CP0224	CP0263	0.0715831	-0.154427	Janamba Swim Creek Station	WHNT King River Goomadeer River	Janamba Swim Creek Station_WHNT King River Goomadeer River	0.735755	1	220.156
67639	CP0226	CP0331	0.0891288	-0.152341	Janamba Swim Creek Station	WHNT King River Goomadeer River	Janamba Swim Creek Station_WHNT King River Goomadeer River	0.732156	1	220.156
68858	CP0228	CP0331	0.0850987	-0.148876	Janamba Swim Creek Station	WHNT King River Goomadeer River	Janamba Swim Creek Station_WHNT King River Goomadeer River	0.729585	1	220.156
65803	CP0010	CP0331	0.0867199	-0.142881	Janamba Swim Creek Station	WHNT King River Goomadeer River	Janamba Swim Creek Station_WHNT King River Goomadeer River	0.734488	1	220.156
69723	CP0009	CP0263	0.0732191	-0.142392	Janamba Swim Creek Station	WHNT King River Goomadeer River	Janamba Swim Creek Station_WHNT King River Goomadeer River	0.735167	1	220.156
66769	CP0224	CP0308	0.071055	-0.136571	Janamba Swim Creek Station	WHNT King River Goomadeer River	Janamba Swim Creek Station_WHNT King River Goomadeer River	0.743643	1	220.156
67615	CP0226	CP0308	0.0848044	-0.133397	Janamba Swim Creek Station	WHNT King River Goomadeer River	Janamba Swim Creek Station_WHNT King River Goomadeer River	0.724477	1	220.156
67670	CP0226	CP0066	0.0773149	-0.124041	Janamba Swim Creek Station	WHNT King River Goomadeer River	Janamba Swim Creek Station_WHNT King River Goomadeer River	0.722212	1	220.156
66758	CP0224	CP0301	0.0688098	-0.123773	Janamba Swim Creek Station	WHNT King River Goomadeer River	Janamba Swim Creek Station_WHNT King River Goomadeer River	0.747517	1	220.156
67628	CP0226	CP0380	0.0812052	-0.11457	Janamba Swim Creek Station	WHNT King River Goomadeer River	Janamba Swim Creek Station_WHNT King River Goomadeer River	0.729377	1	220.156
67659	CP0226	CP0057	0.0799054	-0.110985	Janamba Swim Creek Station	WHNT King River Goomadeer River	Janamba Swim Creek Station_WHNT King River Goomadeer River	0.736713	1	220.156
65779	CP0010	CP0308	0.0777557	-0.108344	Janamba Swim Creek Station	WHNT King River Goomadeer River	Janamba Swim Creek Station_WHNT King River Goomadeer River	0.744994	1	220.156
66782	CP0224	CP0380	0.0642753	-0.106387	Janamba Swim Creek Station	WHNT King River Goomadeer River	Janamba Swim Creek Station_WHNT King River Goomadeer River	0.751366	1	220.156
66759	CP0224	CP0360	0.0664126	-0.0982771	Janamba Swim Creek Station	WHNT King River Goomadeer River	Janamba Swim Creek Station_WHNT King River Goomadeer River	0.757666	1	220.156
69722	CP0009	CP0066	0.0616549	-0.0940713	Janamba Swim Creek Station	WHNT King River Goomadeer River	Janamba Swim Creek Station_WHNT King River Goomadeer River	0.749144	1	220.156
67671	CP0226	CP0263	0.0715196	-0.0915921	Janamba Swim Creek Station	WHNT King River Goomadeer River	Janamba Swim Creek Station_WHNT King River Goomadeer River	0.734759	1	220.156
66756	CP0224	CP0170	0.0659202	-0.0890098	Janamba Swim Creek Station	WHNT King River Goomadeer River	Janamba Swim Creek Station_WHNT King River Goomadeer River	0.762958	1	220.156
66813	CP0224	CP0057	0.065284	-0.0890098	Janamba Swim Creek Station	WHNT King River Goomadeer River	Janamba Swim Creek Station_WHNT King River Goomadeer River	0.762759	1	220.156
65768	CP0010	CP0301	0.0695699	-0.0882353	Janamba Swim Creek Station	WHNT King River Goomadeer River	Janamba Swim Creek Station_WHNT King River Goomadeer River	0.747922	1	220.156
68308	CP0227	CP0057	0.0702197	-0.0792683	Janamba Swim Creek Station	WHNT King River Goomadeer River	Janamba Swim Creek Station_WHNT King River Goomadeer River	0.745229	1	220.156
65766	CP0010	CP0170	0.067028	-0.0788169	Janamba Swim Creek Station	WHNT King River Goomadeer River	Janamba Swim Creek Station_WHNT King River Goomadeer River	0.750587	1	220.156
68320	CP0227	CP0263	0.0683945	-0.0732951	Janamba Swim Creek Station	WHNT King River Goomadeer River	Janamba Swim Creek Station_WHNT King River Goomadeer River	0.7446	1	220.156
65835	CP0010	CP0263	0.0627819	-0.0715699	Janamba Swim Creek Station	WHNT King River Goomadeer River	Janamba Swim Creek Station_WHNT King River Goomadeer River	0.750135	1	220.156
65823	CP0010	CP0057	0.0673042	-0.0700132	Janamba Swim Creek Station	WHNT King River Goomadeer River	Janamba Swim Creek Station_WHNT King River Goomadeer River	0.755864	1	220.156
66824	CP0224	CP0066	0.0538933	-0.0685004	Janamba Swim Creek Station	WHNT King River Goomadeer River	Janamba Swim Creek Station_WHNT King River Goomadeer River	0.761446	1	220.156
65834	CP0010	CP0066	0.0611362	-0.0659631	Janamba Swim Creek Station	WHNT King River Goomadeer River	Janamba Swim Creek Station_WHNT King River Goomadeer River	0.751668	1	220.156
68890	CP0228	CP0263	0.0644697	-0.0632891	Janamba Swim Creek Station	WHNT King River Goomadeer River	Janamba Swim Creek Station_WHNT King River Goomadeer River	0.743112	1	220.156
68878	CP0228	CP0057	0.0639524	-0.0593329	Janamba Swim Creek Station	WHNT King River Goomadeer River	Janamba Swim Creek Station_WHNT King River Goomadeer River	0.749775	1	220.156
65769	CP0010	CP0360	0.0608096	-0.0592715	Janamba Swim Creek Station	WHNT King River Goomadeer River	Janamba Swim Creek Station_WHNT King River Goomadeer River	0.75422	1	220.156
69274	CP0005	CP0057	0.0612392	-0.0519564	Janamba Swim Creek Station	WHNT King River Goomadeer River	Janamba Swim Creek Station_WHNT King River Goomadeer River	0.751261	1	220.156
65792	CP0010	CP0380	0.0610645	-0.0519308	Janamba Swim Creek Station	WHNT King River Goomadeer River	Janamba Swim Creek Station_WHNT King River Goomadeer River	0.758841	1	220.156
65756	CP0010	CP0300	0.0632111	-0.0511889	Janamba Swim Creek Station	WHNT King River Goomadeer River	Janamba Swim Creek Station_WHNT King River Goomadeer River	0.761784	1	220.156
68277	CP0227	CP0380	0.0654426	-0.0511218	Janamba Swim Creek Station	WHNT King River Goomadeer River	Janamba Swim Creek Station_WHNT King River Goomadeer River	0.752863	1	220.156
69580	CP0006	CP0263	0.0645278	-0.0473056	Janamba Swim Creek Station	WHNT King River Goomadeer River	Janamba Swim Creek Station_WHNT King River Goomadeer River	0.74234	1	220.156
68889	CP0228	CP0066	0.0606661	-0.0455836	Janamba Swim Creek Station	WHNT King River Goomadeer River	Janamba Swim Creek Station_WHNT King River Goomadeer River	0.749325	1	220.156
69568	CP0006	CP0057	0.0614747	-0.0419872	Janamba Swim Creek Station	WHNT King River Goomadeer River	Janamba Swim Creek Station_WHNT King River Goomadeer River	0.756625	1	220.156
68319	CP0227	CP0066	0.0606333	-0.041879	Janamba Swim Creek Station	WHNT King River Goomadeer River	Janamba Swim Creek Station_WHNT King River Goomadeer River	0.754498	1	220.156
69286	CP0005	CP0263	0.0608351	-0.0248644	Janamba Swim Creek Station	WHNT King River Goomadeer River	Janamba Swim Creek Station_WHNT King River Goomadeer River	0.74739	1	220.156
69285	CP0005	CP0066	0.0529062	0.0128089	Janamba Swim Creek Station	WHNT King River Goomadeer River	Janamba Swim Creek Station_WHNT King River Goomadeer River	0.762012	1	220.156
69579	CP0006	CP0066	0.0466583	0.0261628	Janamba Swim Creek Station	WHNT King River Goomadeer River	Janamba Swim Creek Station_WHNT King River Goomadeer River	0.7677	1	220.156
69296	CP0240	CP0337	0.111214	-0.394247	Janamba Swim Creek Station	WHNT Maningrida Bawinanga Liverpool Rv Blyth Rv	Janamba Swim Creek Station_WHNT Maningrida Bawinanga Liverpool Rv Blyth Rv	0.712082	1	278.237
69307	CP0240	CP0338	0.0987677	-0.359796	Janamba Swim Creek Station	WHNT Maningrida Bawinanga Liverpool Rv Blyth Rv	Janamba Swim Creek Station_WHNT Maningrida Bawinanga Liverpool Rv Blyth Rv	0.717017	1	278.237
69293	CP0240	CP0037	0.0899281	-0.319725	Janamba Swim Creek Station	WHNT Maningrida Bawinanga Liverpool Rv Blyth Rv	Janamba Swim Creek Station_WHNT Maningrida Bawinanga Liverpool Rv Blyth Rv	0.72518	1	278.237
69305	CP0240	CP0253	0.0852671	-0.305623	Janamba Swim Creek Station	WHNT Maningrida Bawinanga Liverpool Rv Blyth Rv	Janamba Swim Creek Station_WHNT Maningrida Bawinanga Liverpool Rv Blyth Rv	0.727019	1	278.237
69294	CP0240	CP0245	0.0850872	-0.284155	Janamba Swim Creek Station	WHNT Maningrida Bawinanga Liverpool Rv Blyth Rv	Janamba Swim Creek Station_WHNT Maningrida Bawinanga Liverpool Rv Blyth Rv	0.736104	1	278.237
67616	CP0226	CP0374	0.0957271	-0.194838	Janamba Swim Creek Station	WHNT Maningrida Bawinanga Liverpool Rv Blyth Rv	Janamba Swim Creek Station_WHNT Maningrida Bawinanga Liverpool Rv Blyth Rv	0.718045	1	278.237
65754	CP0010	CP0165	0.0848222	-0.189219	Janamba Swim Creek Station	WHNT Maningrida Bawinanga Liverpool Rv Blyth Rv	Janamba Swim Creek Station_WHNT Maningrida Bawinanga Liverpool Rv Blyth Rv	0.741021	1	278.237
66805	CP0224	CP0337	0.0847207	-0.174394	Janamba Swim Creek Station	WHNT Maningrida Bawinanga Liverpool Rv Blyth Rv	Janamba Swim Creek Station_WHNT Maningrida Bawinanga Liverpool Rv Blyth Rv	0.734924	1	278.237
66770	CP0224	CP0374	0.0848937	-0.173729	Janamba Swim Creek Station	WHNT Maningrida Bawinanga Liverpool Rv Blyth Rv	Janamba Swim Creek Station_WHNT Maningrida Bawinanga Liverpool Rv Blyth Rv	0.738048	1	278.237
67612	CP0226	CP0023	0.0901131	-0.161189	Janamba Swim Creek Station	WHNT Maningrida Bawinanga Liverpool Rv Blyth Rv	Janamba Swim Creek Station_WHNT Maningrida Bawinanga Liverpool Rv Blyth Rv	0.726833	1	278.237
66766	CP0224	CP0023	0.0813596	-0.156491	Janamba Swim Creek Station	WHNT Maningrida Bawinanga Liverpool Rv Blyth Rv	Janamba Swim Creek Station_WHNT Maningrida Bawinanga Liverpool Rv Blyth Rv	0.743084	1	278.237
67662	CP0226	CP0338	0.0898938	-0.154808	Janamba Swim Creek Station	WHNT Maningrida Bawinanga Liverpool Rv Blyth Rv	Janamba Swim Creek Station_WHNT Maningrida Bawinanga Liverpool Rv Blyth Rv	0.715855	1	278.237
65780	CP0010	CP0374	0.0865927	-0.15202	Janamba Swim Creek Station	WHNT Maningrida Bawinanga Liverpool Rv Blyth Rv	Janamba Swim Creek Station_WHNT Maningrida Bawinanga Liverpool Rv Blyth Rv	0.73431	1	278.237
66779	CP0224	CP0186	0.0776033	-0.151297	Janamba Swim Creek Station	WHNT Maningrida Bawinanga Liverpool Rv Blyth Rv	Janamba Swim Creek Station_WHNT Maningrida Bawinanga Liverpool Rv Blyth Rv	0.742375	1	278.237
66816	CP0224	CP0338	0.0718563	-0.148977	Janamba Swim Creek Station	WHNT Maningrida Bawinanga Liverpool Rv Blyth Rv	Janamba Swim Creek Station_WHNT Maningrida Bawinanga Liverpool Rv Blyth Rv	0.737888	1	278.237
66781	CP0224	CP0329	0.0733042	-0.146758	Janamba Swim Creek Station	WHNT Maningrida Bawinanga Liverpool Rv Blyth Rv	Janamba Swim Creek Station_WHNT Maningrida Bawinanga Liverpool Rv Blyth Rv	0.738603	1	278.237
67651	CP0226	CP0337	0.0870132	-0.139461	Janamba Swim Creek Station	WHNT Maningrida Bawinanga Liverpool Rv Blyth Rv	Janamba Swim Creek Station_WHNT Maningrida Bawinanga Liverpool Rv Blyth Rv	0.728619	1	278.237
66791	CP0224	CP0191	0.0710669	-0.136875	Janamba Swim Creek Station	WHNT Maningrida Bawinanga Liverpool Rv Blyth Rv	Janamba Swim Creek Station_WHNT Maningrida Bawinanga Liverpool Rv Blyth Rv	0.743761	1	278.237
65776	CP0010	CP0023	0.0825041	-0.136559	Janamba Swim Creek Station	WHNT Maningrida Bawinanga Liverpool Rv Blyth Rv	Janamba Swim Creek Station_WHNT Maningrida Bawinanga Liverpool Rv Blyth Rv	0.733762	1	278.237
65815	CP0010	CP0337	0.0824857	-0.12567	Janamba Swim Creek Station	WHNT Maningrida Bawinanga Liverpool Rv Blyth Rv	Janamba Swim Creek Station_WHNT Maningrida Bawinanga Liverpool Rv Blyth Rv	0.737193	1	278.237
66767	CP0224	CP0171	0.0702517	-0.125	Janamba Swim Creek Station	WHNT Maningrida Bawinanga Liverpool Rv Blyth Rv	Janamba Swim Creek Station_WHNT Maningrida Bawinanga Liverpool Rv Blyth Rv	0.747963	1	278.237
68300	CP0227	CP0337	0.0827179	-0.122351	Janamba Swim Creek Station	WHNT Maningrida Bawinanga Liverpool Rv Blyth Rv	Janamba Swim Creek Station_WHNT Maningrida Bawinanga Liverpool Rv Blyth Rv	0.735691	1	278.237
68870	CP0228	CP0337	0.0791951	-0.121528	Janamba Swim Creek Station	WHNT Maningrida Bawinanga Liverpool Rv Blyth Rv	Janamba Swim Creek Station_WHNT Maningrida Bawinanga Liverpool Rv Blyth Rv	0.732232	1	278.237
67637	CP0226	CP0191	0.0801095	-0.121154	Janamba Swim Creek Station	WHNT Maningrida Bawinanga Liverpool Rv Blyth Rv	Janamba Swim Creek Station_WHNT Maningrida Bawinanga Liverpool Rv Blyth Rv	0.72646	1	278.237
66778	CP0224	CP0033	0.0679769	-0.120877	Janamba Swim Creek Station	WHNT Maningrida Bawinanga Liverpool Rv Blyth Rv	Janamba Swim Creek Station_WHNT Maningrida Bawinanga Liverpool Rv Blyth Rv	0.748918	1	278.237
65789	CP0010	CP0186	0.0783394	-0.118143	Janamba Swim Creek Station	WHNT Maningrida Bawinanga Liverpool Rv Blyth Rv	Janamba Swim Creek Station_WHNT Maningrida Bawinanga Liverpool Rv Blyth Rv	0.740704	1	278.237
67627	CP0226	CP0329	0.0822296	-0.118082	Janamba Swim Creek Station	WHNT Maningrida Bawinanga Liverpool Rv Blyth Rv	Janamba Swim Creek Station_WHNT Maningrida Bawinanga Liverpool Rv Blyth Rv	0.728845	1	278.237
65757	CP0010	CP0342	0.0735907	-0.117803	Janamba Swim Creek Station	WHNT Maningrida Bawinanga Liverpool Rv Blyth Rv	Janamba Swim Creek Station_WHNT Maningrida Bawinanga Liverpool Rv Blyth Rv	0.735182	1	278.237
67625	CP0226	CP0186	0.0786312	-0.115249	Janamba Swim Creek Station	WHNT Maningrida Bawinanga Liverpool Rv Blyth Rv	Janamba Swim Creek Station_WHNT Maningrida Bawinanga Liverpool Rv Blyth Rv	0.72834	1	278.237
65826	CP0010	CP0338	0.0739194	-0.111074	Janamba Swim Creek Station	WHNT Maningrida Bawinanga Liverpool Rv Blyth Rv	Janamba Swim Creek Station_WHNT Maningrida Bawinanga Liverpool Rv Blyth Rv	0.739194	1	278.237
68311	CP0227	CP0338	0.0765888	-0.110987	Janamba Swim Creek Station	WHNT Maningrida Bawinanga Liverpool Rv Blyth Rv	Janamba Swim Creek Station_WHNT Maningrida Bawinanga Liverpool Rv Blyth Rv	0.731215	1	278.237
66802	CP0224	CP0037	0.0630744	-0.110897	Janamba Swim Creek Station	WHNT Maningrida Bawinanga Liverpool Rv Blyth Rv	Janamba Swim Creek Station_WHNT Maningrida Bawinanga Liverpool Rv Blyth Rv	0.748874	1	278.237
65791	CP0010	CP0329	0.0777514	-0.108991	Janamba Swim Creek Station	WHNT Maningrida Bawinanga Liverpool Rv Blyth Rv	Janamba Swim Creek Station_WHNT Maningrida Bawinanga Liverpool Rv Blyth Rv	0.742745	1	278.237
65801	CP0010	CP0191	0.0714544	-0.107025	Janamba Swim Creek Station	WHNT Maningrida Bawinanga Liverpool Rv Blyth Rv	Janamba Swim Creek Station_WHNT Maningrida Bawinanga Liverpool Rv Blyth Rv	0.738513	1	278.237
69266	CP0005	CP0337	0.0752033	-0.106788	Janamba Swim Creek Station	WHNT Maningrida Bawinanga Liverpool Rv Blyth Rv	Janamba Swim Creek Station_WHNT Maningrida Bawinanga Liverpool Rv Blyth Rv	0.736604	1	278.237
68274	CP0227	CP0186	0.0724194	-0.101373	Janamba Swim Creek Station	WHNT Maningrida Bawinanga Liverpool Rv Blyth Rv	Janamba Swim Creek Station_WHNT Maningrida Bawinanga Liverpool Rv Blyth Rv	0.733111	1	278.237
67648	CP0226	CP0037	0.0756639	-0.100703	Janamba Swim Creek Station	WHNT Maningrida Bawinanga Liverpool Rv Blyth Rv	Janamba Swim Creek Station_WHNT Maningrida Bawinanga Liverpool Rv Blyth Rv	0.733903	1	278.237
67649	CP0226	CP0245	0.0747409	-0.0976662	Janamba Swim Creek Station	WHNT Maningrida Bawinanga Liverpool Rv Blyth Rv	Janamba Swim Creek Station_WHNT Maningrida Bawinanga Liverpool Rv Blyth Rv	0.73477	1	278.237
66803	CP0224	CP0245	0.0614525	-0.0976508	Janamba Swim Creek Station	WHNT Maningrida Bawinanga Liverpool Rv Blyth Rv	Janamba Swim Creek Station_WHNT Maningrida Bawinanga Liverpool Rv Blyth Rv	0.75428	1	278.237
68276	CP0227	CP0329	0.0772454	-0.0934894	Janamba Swim Creek Station	WHNT Maningrida Bawinanga Liverpool Rv Blyth Rv	Janamba Swim Creek Station_WHNT Maningrida Bawinanga Liverpool Rv Blyth Rv	0.740117	1	278.237
67624	CP0226	CP0033	0.0704277	-0.0920128	Janamba Swim Creek Station	WHNT Maningrida Bawinanga Liverpool Rv Blyth Rv	Janamba Swim Creek Station_WHNT Maningrida Bawinanga Liverpool Rv Blyth Rv	0.733212	1	278.237
68856	CP0228	CP0191	0.0729505	-0.0844381	Janamba Swim Creek Station	WHNT Maningrida Bawinanga Liverpool Rv Blyth Rv	Janamba Swim Creek Station_WHNT Maningrida Bawinanga Liverpool Rv Blyth Rv	0.738624	1	278.237
67660	CP0226	CP0253	0.0691035	-0.0837596	Janamba Swim Creek Station	WHNT Maningrida Bawinanga Liverpool Rv Blyth Rv	Janamba Swim Creek Station_WHNT Maningrida Bawinanga Liverpool Rv Blyth Rv	0.737043	1	278.237
67613	CP0226	CP0171	0.0708805	-0.0821611	Janamba Swim Creek Station	WHNT Maningrida Bawinanga Liverpool Rv Blyth Rv	Janamba Swim Creek Station_WHNT Maningrida Bawinanga Liverpool Rv Blyth Rv	0.738217	1	278.237
65788	CP0010	CP0033	0.0671117	-0.0814644	Janamba Swim Creek Station	WHNT Maningrida Bawinanga Liverpool Rv Blyth Rv	Janamba Swim Creek Station_WHNT Maningrida Bawinanga Liverpool Rv Blyth Rv	0.749053	1	278.237
68273	CP0227	CP0033	0.0687545	-0.0792411	Janamba Swim Creek Station	WHNT Maningrida Bawinanga Liverpool Rv Blyth Rv	Janamba Swim Creek Station_WHNT Maningrida Bawinanga Liverpool Rv Blyth Rv	0.741811	1	278.237
65812	CP0010	CP0037	0.0663541	-0.0731707	Janamba Swim Creek Station	WHNT Maningrida Bawinanga Liverpool Rv Blyth Rv	Janamba Swim Creek Station_WHNT Maningrida Bawinanga Liverpool Rv Blyth Rv	0.752795	1	278.237
66814	CP0224	CP0253	0.054244	-0.0728802	Janamba Swim Creek Station	WHNT Maningrida Bawinanga Liverpool Rv Blyth Rv	Janamba Swim Creek Station_WHNT Maningrida Bawinanga Liverpool Rv Blyth Rv	0.759596	1	278.237
68881	CP0228	CP0338	0.0668963	-0.0680952	Janamba Swim Creek Station	WHNT Maningrida Bawinanga Liverpool Rv Blyth Rv	Janamba Swim Creek Station_WHNT Maningrida Bawinanga Liverpool Rv Blyth Rv	0.742476	1	278.237
65765	CP0010	CP0020	0.0605951	-0.06147	Janamba Swim Creek Station	WHNT Maningrida Bawinanga Liverpool Rv Blyth Rv	Janamba Swim Creek Station_WHNT Maningrida Bawinanga Liverpool Rv Blyth Rv	0.753381	1	278.237
65824	CP0010	CP0253	0.0602236	-0.060396	Janamba Swim Creek Station	WHNT Maningrida Bawinanga Liverpool Rv Blyth Rv	Janamba Swim Creek Station_WHNT Maningrida Bawinanga Liverpool Rv Blyth Rv	0.754057	1	278.237
65777	CP0010	CP0171	0.0590687	-0.059571	Janamba Swim Creek Station	WHNT Maningrida Bawinanga Liverpool Rv Blyth Rv	Janamba Swim Creek Station_WHNT Maningrida Bawinanga Liverpool Rv Blyth Rv	0.751857	1	278.237
68286	CP0227	CP0191	0.066065	-0.0591432	Janamba Swim Creek Station	WHNT Maningrida Bawinanga Liverpool Rv Blyth Rv	Janamba Swim Creek Station_WHNT Maningrida Bawinanga Liverpool Rv Blyth Rv	0.750361	1	278.237
68297	CP0227	CP0037	0.062961	-0.0587954	Janamba Swim Creek Station	WHNT Maningrida Bawinanga Liverpool Rv Blyth Rv	Janamba Swim Creek Station_WHNT Maningrida Bawinanga Liverpool Rv Blyth Rv	0.747527	1	278.237
65813	CP0010	CP0245	0.0578796	-0.0551519	Janamba Swim Creek Station	WHNT Maningrida Bawinanga Liverpool Rv Blyth Rv	Janamba Swim Creek Station_WHNT Maningrida Bawinanga Liverpool Rv Blyth Rv	0.754778	1	278.237
66755	CP0224	CP0020	0.0540735	-0.0529082	Janamba Swim Creek Station	WHNT Maningrida Bawinanga Liverpool Rv Blyth Rv	Janamba Swim Creek Station_WHNT Maningrida Bawinanga Liverpool Rv Blyth Rv	0.769647	1	278.237
68309	CP0227	CP0253	0.0568345	-0.0528662	Janamba Swim Creek Station	WHNT Maningrida Bawinanga Liverpool Rv Blyth Rv	Janamba Swim Creek Station_WHNT Maningrida Bawinanga Liverpool Rv Blyth Rv	0.744604	1	278.237
68867	CP0228	CP0037	0.0601152	-0.0369085	Janamba Swim Creek Station	WHNT Maningrida Bawinanga Liverpool Rv Blyth Rv	Janamba Swim Creek Station_WHNT Maningrida Bawinanga Liverpool Rv Blyth Rv	0.75378	1	278.237
68879	CP0228	CP0253	0.0554356	-0.0356692	Janamba Swim Creek Station	WHNT Maningrida Bawinanga Liverpool Rv Blyth Rv	Janamba Swim Creek Station_WHNT Maningrida Bawinanga Liverpool Rv Blyth Rv	0.75	1	278.237
69571	CP0006	CP0338	0.0636908	-0.0347478	Janamba Swim Creek Station	WHNT Maningrida Bawinanga Liverpool Rv Blyth Rv	Janamba Swim Creek Station_WHNT Maningrida Bawinanga Liverpool Rv Blyth Rv	0.74814	1	278.237
68298	CP0227	CP0245	0.0615219	-0.0342357	Janamba Swim Creek Station	WHNT Maningrida Bawinanga Liverpool Rv Blyth Rv	Janamba Swim Creek Station_WHNT Maningrida Bawinanga Liverpool Rv Blyth Rv	0.759759	1	278.237
68868	CP0228	CP0245	0.0590353	-0.0318612	Janamba Swim Creek Station	WHNT Maningrida Bawinanga Liverpool Rv Blyth Rv	Janamba Swim Creek Station_WHNT Maningrida Bawinanga Liverpool Rv Blyth Rv	0.75558	1	278.237
69277	CP0005	CP0338	0.0652647	-0.0318375	Janamba Swim Creek Station	WHNT Maningrida Bawinanga Liverpool Rv Blyth Rv	Janamba Swim Creek Station_WHNT Maningrida Bawinanga Liverpool Rv Blyth Rv	0.747281	1	278.237
69569	CP0006	CP0253	0.0535039	-0.00183824	Janamba Swim Creek Station	WHNT Maningrida Bawinanga Liverpool Rv Blyth Rv	Janamba Swim Creek Station_WHNT Maningrida Bawinanga Liverpool Rv Blyth Rv	0.758422	1	278.237
69275	CP0005	CP0253	0.0507468	0.0028649	Janamba Swim Creek Station	WHNT Maningrida Bawinanga Liverpool Rv Blyth Rv	Janamba Swim Creek Station_WHNT Maningrida Bawinanga Liverpool Rv Blyth Rv	0.754094	1	278.237
69263	CP0005	CP0037	0.0557755	0.00376733	Janamba Swim Creek Station	WHNT Maningrida Bawinanga Liverpool Rv Blyth Rv	Janamba Swim Creek Station_WHNT Maningrida Bawinanga Liverpool Rv Blyth Rv	0.759536	1	278.237
69264	CP0005	CP0245	0.0536164	0.00592345	Janamba Swim Creek Station	WHNT Maningrida Bawinanga Liverpool Rv Blyth Rv	Janamba Swim Creek Station_WHNT Maningrida Bawinanga Liverpool Rv Blyth Rv	0.760975	1	278.237
69306	CP0240	CP0256	0.111954	-0.369281	Janamba Swim Creek Station	WHNT Tiwi Islands	Janamba Swim Creek Station_WHNT Tiwi Islands	0.7277	0	140.854
67661	CP0226	CP0256	0.100785	-0.319717	Janamba Swim Creek Station	WHNT Tiwi Islands	Janamba Swim Creek Station_WHNT Tiwi Islands	0.719737	0	140.854
69298	CP0240	CP0279	0.0916471	-0.30749	Janamba Swim Creek Station	WHNT Tiwi Islands	Janamba Swim Creek Station_WHNT Tiwi Islands	0.731824	0	140.854
69295	CP0240	CP0254	0.083093	-0.280138	Janamba Swim Creek Station	WHNT Tiwi Islands	Janamba Swim Creek Station_WHNT Tiwi Islands	0.73549	0	140.854
69287	CP0240	CP0266	0.0829726	-0.278543	Janamba Swim Creek Station	WHNT Tiwi Islands	Janamba Swim Creek Station_WHNT Tiwi Islands	0.736111	0	140.854
69309	CP0240	CP0282	0.0772711	-0.242492	Janamba Swim Creek Station	WHNT Tiwi Islands	Janamba Swim Creek Station_WHNT Tiwi Islands	0.7462	0	140.854
65825	CP0010	CP0256	0.0856109	-0.230694	Janamba Swim Creek Station	WHNT Tiwi Islands	Janamba Swim Creek Station_WHNT Tiwi Islands	0.746516	0	140.854
69570	CP0006	CP0256	0.0786618	-0.221311	Janamba Swim Creek Station	WHNT Tiwi Islands	Janamba Swim Creek Station_WHNT Tiwi Islands	0.744485	0	140.854
69276	CP0005	CP0256	0.0792991	-0.219898	Janamba Swim Creek Station	WHNT Tiwi Islands	Janamba Swim Creek Station_WHNT Tiwi Islands	0.746658	0	140.854
68310	CP0227	CP0256	0.0794367	-0.217162	Janamba Swim Creek Station	WHNT Tiwi Islands	Janamba Swim Creek Station_WHNT Tiwi Islands	0.74824	0	140.854
66815	CP0224	CP0256	0.0815847	-0.202036	Janamba Swim Creek Station	WHNT Tiwi Islands	Janamba Swim Creek Station_WHNT Tiwi Islands	0.757236	0	140.854
68880	CP0228	CP0256	0.0737127	-0.197697	Janamba Swim Creek Station	WHNT Tiwi Islands	Janamba Swim Creek Station_WHNT Tiwi Islands	0.750768	0	140.854
67607	CP0226	CP0261	0.0882567	-0.146993	Janamba Swim Creek Station	WHNT Tiwi Islands	Janamba Swim Creek Station_WHNT Tiwi Islands	0.719457	0	140.854
67626	CP0226	CP0248	0.0823121	-0.140909	Janamba Swim Creek Station	WHNT Tiwi Islands	Janamba Swim Creek Station_WHNT Tiwi Islands	0.734132	0	140.854
67638	CP0226	CP0249	0.0829822	-0.140199	Janamba Swim Creek Station	WHNT Tiwi Islands	Janamba Swim Creek Station_WHNT Tiwi Islands	0.729987	0	140.854
66761	CP0224	CP0261	0.0731707	-0.132363	Janamba Swim Creek Station	WHNT Tiwi Islands	Janamba Swim Creek Station_WHNT Tiwi Islands	0.747335	0	140.854
66784	CP0224	CP0265	0.0721631	-0.129292	Janamba Swim Creek Station	WHNT Tiwi Islands	Janamba Swim Creek Station_WHNT Tiwi Islands	0.748151	0	140.854
66804	CP0224	CP0254	0.0671723	-0.125088	Janamba Swim Creek Station	WHNT Tiwi Islands	Janamba Swim Creek Station_WHNT Tiwi Islands	0.745486	0	140.854
[truncated: 12,597 more rows]
