# Supplementary material for: Translocation, genetic structure and homing ability confirm geographic barriers disrupt saltwater crocodile movement and dispersal
Source: PLoS One. 2019 Aug 28;14(8):e0205862. doi: 10.1371/journal.pone.0205862 (PMC6713319; doi:10.1371/journal.pone.0205862)
Supplement: S1 File — (ZIP) [file pone.0205862.s001.zip › Cobourg croc paper genetic analyses/popdist.csv]

Pop1	Pop2	Pop_comp	Dist	Cost_dist	Cost_dist2	IBS	Cob_span	IBS0	kinship
DEMED East Alligator River	Janamba Donalds Lagoon Station	DEMED East Alligator River_Janamba Donalds Lagoon Station	193.5885229	3.726402616	213.6018698	0.754599567	0	0.078463203	-0.134004237
DEMED East Alligator River	Janamba Muk Muk Mugalimba	DEMED East Alligator River_Janamba Muk Muk Mugalimba	296.0401594	6.329103953	331.3174292	0.766022425	0	0.061872767	-0.056810513
DEMED East Alligator River	Janamba Swim Creek Station	DEMED East Alligator River_Janamba Swim Creek Station	119.3726845	2.191657751	132.606146	0.754963179	0	0.069582256	-0.09812216
DEMED East Alligator River	Walker Beatrice Hill Station	DEMED East Alligator River_Walker Beatrice Hill Station	187.4991148	3.799633493	205.2108363	0.761251398	0	0.064102354	-0.058269505
DEMED East Alligator River	WHNT Adelaide River Station	DEMED East Alligator River_WHNT Adelaide River Station	190.5115623	2.464167064	321.4000954	0.757075073	0	0.059327763	-0.050902343
DEMED East Alligator River	WHNT Arafura Swamp Darbilla Creek	DEMED East Alligator River_WHNT Arafura Swamp Darbilla Creek	243.966669	6.307157417	563.2332786	0.737195273	1	0.081975767	-0.304100847
DEMED East Alligator River	WHNT Elizabeth Downs Station	DEMED East Alligator River_WHNT Elizabeth Downs Station	328.4299663	3.583732187	445.5779699	0.765339755	0	0.060455031	-0.047195782
DEMED East Alligator River	WHNT King River Goomadeer River	DEMED East Alligator River_WHNT King River Goomadeer River	100.7874173	0.985781703	428.4171308	0.74737968	1	0.069691148	-0.094750655
DEMED East Alligator River	WHNT Labelle Downs Station	DEMED East Alligator River_WHNT Labelle Downs Station	306.8714562	5.595804164	350.91105	0.76238421	0	0.063115394	-0.069662697
DEMED East Alligator River	WHNT Litchfield Station	DEMED East Alligator River_WHNT Litchfield Station	295.2138888	3.383558692	697.6377797	0.761261359	0	0.064466701	-0.088427037
DEMED East Alligator River	WHNT Maningrida Bawinanga Liverpool Rv Blyth Rv	DEMED East Alligator River_WHNT Maningrida Bawinanga Liverpool Rv Blyth Rv	161.7303878	1.848407497	774.9626702	0.742183925	1	0.072594734	-0.106709592
DEMED East Alligator River	WHNT Tiwi Islands	DEMED East Alligator River_WHNT Tiwi Islands	234.8404538	22.91167648	296.8255535	0.751583253	0	0.067826083	-0.080060973
DEMED East Alligator River	WHNT Wagait Finniss River	DEMED East Alligator River_WHNT Wagait Finniss River	282.8962471	5.379841913	329.8449962	0.762645192	0	0.06213034	-0.060629052
DEMED East Alligator River	WHNT Welltree Station	DEMED East Alligator River_WHNT Welltree Station	285.035187	3.327763256	477.1858404	0.732475331	0	0.084081076	-0.148852832
DEMED East Alligator River	WMI Djukbinj National Park	DEMED East Alligator River_WMI Djukbinj National Park	168.6810322	9.142904415	177.1638963	0.755396214	0	0.069823123	-0.161530193
DEMED East Alligator River	WMI Harrison Dam	DEMED East Alligator River_WMI Harrison Dam	176.4895225	3.918259808	192.7175506	0.76228321	0	0.060487455	-0.072714682
DEMED East Alligator River	WMI Koolpinyah Station	DEMED East Alligator River_WMI Koolpinyah Station	184.2226279	3.016995091	190.7402908	0.762320818	0	0.057494681	-0.044854852
Janamba Donalds Lagoon Station	DEMED East Alligator River	Janamba Donalds Lagoon Station_DEMED East Alligator River	193.5885229	3.726402616	213.6018698	0.764006719	0	0.067735483	-0.102811577
Janamba Donalds Lagoon Station	Janamba Muk Muk Mugalimba	Janamba Donalds Lagoon Station_Janamba Muk Muk Mugalimba	102.7571729	4.962287991	216.8914323	0.750101062	0	0.076180132	-0.149470905
Janamba Donalds Lagoon Station	Janamba Swim Creek Station	Janamba Donalds Lagoon Station_Janamba Swim Creek Station	77.88568045	2.324456591	88.0284963	0.754485398	0	0.075521385	-0.147303135
Janamba Donalds Lagoon Station	Walker Beatrice Hill Station	Janamba Donalds Lagoon Station_Walker Beatrice Hill Station	8.762399666	2.197988775	8.392686819	0.753706026	0	0.072230442	-0.13295492
Janamba Donalds Lagoon Station	WHNT Adelaide River Station	Janamba Donalds Lagoon Station_WHNT Adelaide River Station	9.852825883	1.262262192	112.3070637	0.75128038	0	0.068085638	-0.12860696
Janamba Donalds Lagoon Station	WHNT Arafura Swamp Darbilla Creek	Janamba Donalds Lagoon Station_WHNT Arafura Swamp Darbilla Creek	418.8290109	8.971649996	588.0971325	0.730895969	1	0.09226186	-0.440909417
Janamba Donalds Lagoon Station	WHNT Elizabeth Downs Station	Janamba Donalds Lagoon Station_WHNT Elizabeth Downs Station	151.9172037	2.560641041	331.1519729	0.756345489	0	0.074212092	-0.130479888
Janamba Donalds Lagoon Station	WHNT King River Goomadeer River	Janamba Donalds Lagoon Station_WHNT King River Goomadeer River	293.436447	4.253810199	453.2809847	0.742518237	1	0.078043927	-0.16721404
Janamba Donalds Lagoon Station	WHNT Labelle Downs Station	Janamba Donalds Lagoon Station_WHNT Labelle Downs Station	113.3637341	4.229078675	236.485053	0.749699656	0	0.076953325	-0.155527424
Janamba Donalds Lagoon Station	WHNT Litchfield Station	Janamba Donalds Lagoon Station_WHNT Litchfield Station	106.4065026	2.031532964	583.2117827	0.748490328	0	0.076754989	-0.174630806
Janamba Donalds Lagoon Station	WHNT Maningrida Bawinanga Liverpool Rv Blyth Rv	Janamba Donalds Lagoon Station_WHNT Maningrida Bawinanga Liverpool Rv Blyth Rv	346.6416538	4.8194946	799.8265241	0.735335224	1	0.082073272	-0.188146616
Janamba Donalds Lagoon Station	WHNT Tiwi Islands	Janamba Donalds Lagoon Station_WHNT Tiwi Islands	140.7569282	21.32458399	274.6026536	0.750196563	0	0.073607437	-0.143498124
Janamba Donalds Lagoon Station	WHNT Wagait Finniss River	Janamba Donalds Lagoon Station_WHNT Wagait Finniss River	89.93590118	4.012973712	215.4189992	0.755718963	0	0.069221605	-0.12268206
Janamba Donalds Lagoon Station	WHNT Welltree Station	Janamba Donalds Lagoon Station_WHNT Welltree Station	92.81010142	1.961165565	362.7598434	0.729121767	0	0.08908046	-0.214769707
Janamba Donalds Lagoon Station	WMI Djukbinj National Park	Janamba Donalds Lagoon Station_WMI Djukbinj National Park	37.24363417	8.301283105	36.43972163	0.756567973	0	0.07331387	-0.181806271
Janamba Donalds Lagoon Station	WMI Harrison Dam	Janamba Donalds Lagoon Station_WMI Harrison Dam	21.09838538	2.320639523	20.88528028	0.760618396	0	0.061910523	-0.097760708
Janamba Donalds Lagoon Station	WMI Koolpinyah Station	Janamba Donalds Lagoon Station_WMI Koolpinyah Station	38.53411932	1.429894835	45.22920685	0.763656784	0	0.061185984	-0.090516597
Janamba Muk Muk Mugalimba	Janamba Swim Creek Station	Janamba Muk Muk Mugalimba_Janamba Swim Creek Station	178.1600621	4.93230793	218.5106846	0.752470891	0	0.07107237	-0.111817212
Janamba Muk Muk Mugalimba	WHNT Elizabeth Downs Station	Janamba Muk Muk Mugalimba_WHNT Elizabeth Downs Station	102.0139261	3.998129521	116.300686	0.774097014	0	0.058346823	-0.039995034
Janamba Muk Muk Mugalimba	WHNT King River Goomadeer River	Janamba Muk Muk Mugalimba_WHNT King River Goomadeer River	396.1392199	6.856511536	525.6502204	0.746672877	1	0.069804446	-0.101177296
Janamba Muk Muk Mugalimba	WHNT Labelle Downs Station	Janamba Muk Muk Mugalimba_WHNT Labelle Downs Station	18.71341898	5.103380233	21.63376614	0.773405173	0	0.057482134	-0.049481272
Janamba Muk Muk Mugalimba	WHNT Litchfield Station	Janamba Muk Muk Mugalimba_WHNT Litchfield Station	48.75868149	3.403383096	368.3604958	0.767565047	0	0.062312394	-0.082113273
Janamba Muk Muk Mugalimba	WHNT Maningrida Bawinanga Liverpool Rv Blyth Rv	Janamba Muk Muk Mugalimba_WHNT Maningrida Bawinanga Liverpool Rv Blyth Rv	448.9480709	7.422195936	872.1957599	0.740685028	1	0.07309288	-0.115430855
Janamba Muk Muk Mugalimba	WHNT Tiwi Islands	Janamba Muk Muk Mugalimba_WHNT Tiwi Islands	169.5515325	23.87227797	285.6293624	0.750175788	0	0.068693861	-0.098582036
Janamba Muk Muk Mugalimba	WHNT Wagait Finniss River	Janamba Muk Muk Mugalimba_WHNT Wagait Finniss River	13.61503634	5.173611883	13.03963659	0.769857573	0	0.06061469	-0.072591675
Janamba Muk Muk Mugalimba	WHNT Welltree Station	Janamba Muk Muk Mugalimba_WHNT Welltree Station	31.20531074	3.209008273	147.9085565	0.736276634	0	0.088840737	-0.197321429
Janamba Swim Creek Station	WHNT King River Goomadeer River	Janamba Swim Creek Station_WHNT King River Goomadeer River	220.1555809	2.719085312	392.1661386	0.744075408	1	0.072137626	-0.113945017
Janamba Swim Creek Station	WHNT Maningrida Bawinanga Liverpool Rv Blyth Rv	Janamba Swim Creek Station_WHNT Maningrida Bawinanga Liverpool Rv Blyth Rv	278.2371844	3.288638793	738.711678	0.741134151	1	0.07268516	-0.113503455
Janamba Swim Creek Station	WHNT Tiwi Islands	Janamba Swim Creek Station_WHNT Tiwi Islands	140.8536514	21.50973045	233.2775063	0.748236238	0	0.070621794	-0.108466768
Walker Beatrice Hill Station	DEMED East Alligator River	Walker Beatrice Hill Station_DEMED East Alligator River	187.4991148	3.799633493	205.2108363	0.763708192	0	0.061557115	-0.044438575
Walker Beatrice Hill Station	Janamba Muk Muk Mugalimba	Walker Beatrice Hill Station_Janamba Muk Muk Mugalimba	108.5410446	5.00696174	208.4995193	0.760520938	0	0.062105405	-0.062327267
Walker Beatrice Hill Station	Janamba Swim Creek Station	Walker Beatrice Hill Station_Janamba Swim Creek Station	70.54552149	2.397687467	79.6374628	0.756708695	0	0.067707492	-0.084038356
Walker Beatrice Hill Station	WHNT Adelaide River Station	Walker Beatrice Hill Station_WHNT Adelaide River Station	15.74974439	1.335493068	117.8345862	0.769852677	0	0.051922386	0.004419192
Walker Beatrice Hill Station	WHNT Arafura Swamp Darbilla Creek	Walker Beatrice Hill Station_WHNT Arafura Swamp Darbilla Creek	415.0604135	9.044880873	579.706099	0.739676267	1	0.07816713	-0.349019838
Walker Beatrice Hill Station	WHNT Elizabeth Downs Station	Walker Beatrice Hill Station_WHNT Elizabeth Downs Station	160.5867628	2.633871917	322.7600599	0.761721963	0	0.064177045	-0.052159751
Walker Beatrice Hill Station	WHNT King River Goomadeer River	Walker Beatrice Hill Station_WHNT King River Goomadeer River	287.6862615	4.327041075	444.8899511	0.747360655	1	0.068601081	-0.082314584
Walker Beatrice Hill Station	WHNT Labelle Downs Station	Walker Beatrice Hill Station_WHNT Labelle Downs Station	119.9884159	4.2738005	228.0931401	0.75871775	0	0.063370869	-0.069716201
Walker Beatrice Hill Station	WHNT Litchfield Station	Walker Beatrice Hill Station_WHNT Litchfield Station	114.4888565	2.10476384	574.8198698	0.758202351	0	0.064115727	-0.086222425
Walker Beatrice Hill Station	WHNT Maningrida Bawinanga Liverpool Rv Blyth Rv	Walker Beatrice Hill Station_WHNT Maningrida Bawinanga Liverpool Rv Blyth Rv	341.898498	4.892725476	791.4354906	0.743058511	1	0.071305276	-0.09217846
Walker Beatrice Hill Station	WHNT Tiwi Islands	Walker Beatrice Hill Station_WHNT Tiwi Islands	134.4501655	21.24696747	266.2116201	0.753634268	0	0.065848846	-0.062366404
Walker Beatrice Hill Station	WHNT Wagait Finniss River	Walker Beatrice Hill Station_WHNT Wagait Finniss River	95.43900624	4.057612883	207.0270863	0.760472517	0	0.060065577	-0.053475403
Walker Beatrice Hill Station	WHNT Welltree Station	Walker Beatrice Hill Station_WHNT Welltree Station	100.2660033	2.018391018	354.3679305	0.738257619	0	0.081275509	-0.120270455
Walker Beatrice Hill Station	WMI Djukbinj National Park	Walker Beatrice Hill Station_WMI Djukbinj National Park	28.48397029	8.374513981	28.04824908	0.77328015	0	0.058863474	-0.094253203
Walker Beatrice Hill Station	WMI Koolpinyah Station	Walker Beatrice Hill Station_WMI Koolpinyah Station	30.83930558	1.344054151	36.83729393	0.783557951	0	0.045642408	0.039905363
WHNT Adelaide River Station	DEMED East Alligator River	WHNT Adelaide River Station_DEMED East Alligator River	190.5115623	2.464167064	321.4000954	0.755252476	0	0.060730783	-0.055137954
WHNT Adelaide River Station	Janamba Muk Muk Mugalimba	WHNT Adelaide River Station_Janamba Muk Muk Mugalimba	107.3016905	3.942357208	324.6905124	0.757403453	0	0.059741569	-0.052434987
WHNT Adelaide River Station	Janamba Swim Creek Station	WHNT Adelaide River Station_Janamba Swim Creek Station	77.50366111	1.06221705	195.8267219	0.753378083	0	0.062065127	-0.071266897
WHNT Adelaide River Station	Walker Beatrice Hill Station	WHNT Adelaide River Station_Walker Beatrice Hill Station	15.74974439	1.335493068	117.8345862	0.761049637	0	0.055276179	-0.027679322
WHNT Adelaide River Station	WHNT Arafura Swamp Darbilla Creek	WHNT Adelaide River Station_WHNT Arafura Swamp Darbilla Creek	412.7626319	7.709414444	695.8953581	0.733194925	1	0.075604477	-0.298329585
WHNT Adelaide River Station	WHNT Elizabeth Downs Station	WHNT Adelaide River Station_WHNT Elizabeth Downs Station	149.3567696	1.43990407	438.951053	0.754466199	0	0.060613387	-0.059197198
WHNT Adelaide River Station	WHNT King River Goomadeer River	WHNT Adelaide River Station_WHNT King River Goomadeer River	289.7464064	2.991574646	561.0792102	0.744981058	1	0.064618204	-0.053871049
WHNT Adelaide River Station	WHNT Labelle Downs Station	WHNT Adelaide River Station_WHNT Labelle Downs Station	116.603943	3.209090128	344.2841332	0.75520718	0	0.061143438	-0.062010727
WHNT Adelaide River Station	WHNT Litchfield Station	WHNT Adelaide River Station_WHNT Litchfield Station	106.5475324	1.005428052	691.0108629	0.755921519	0	0.06042452	-0.071847487
WHNT Adelaide River Station	WHNT Maningrida Bawinanga Liverpool Rv Blyth Rv	WHNT Adelaide River Station_WHNT Maningrida Bawinanga Liverpool Rv Blyth Rv	341.6464478	3.557259047	907.6247497	0.738990346	1	0.067213423	-0.061943581
WHNT Adelaide River Station	WHNT Tiwi Islands	WHNT Adelaide River Station_WHNT Tiwi Islands	149.9475298	20.44753605	382.4008792	0.752852334	0	0.059651661	-0.031591193
WHNT Adelaide River Station	WHNT Wagait Finniss River	WHNT Adelaide River Station_WHNT Wagait Finniss River	94.93004892	2.993077092	323.2180794	0.760890134	0	0.057330738	-0.033293504
WHNT Adelaide River Station	WHNT Welltree Station	WHNT Adelaide River Station_WHNT Welltree Station	94.62448134	0.941089104	470.5589236	0.732468569	0	0.079105838	-0.125688436
WHNT Adelaide River Station	WMI Djukbinj National Park	WHNT Adelaide River Station_WMI Djukbinj National Park	42.24896332	7.039020913	144.2383601	0.753495804	0	0.063208261	-0.126738329
WHNT Adelaide River Station	WMI Koolpinyah Station	WHNT Adelaide River Station_WMI Koolpinyah Station	46.58180278	0.552854666	153.028287	0.76365433	0	0.045634208	0.051058352
WHNT Arafura Swamp Darbilla Creek	DEMED East Alligator River	WHNT Arafura Swamp Darbilla Creek_DEMED East Alligator River	243.966669	6.307157417	563.2332786	0.735895675	1	0.08225592	-0.371677957
WHNT Arafura Swamp Darbilla Creek	Janamba Donalds Lagoon Station	WHNT Arafura Swamp Darbilla Creek_Janamba Donalds Lagoon Station	418.8290109	8.971649996	588.0971325	0.730512828	1	0.089181206	-0.203222425
WHNT Arafura Swamp Darbilla Creek	Janamba Muk Muk Mugalimba	WHNT Arafura Swamp Darbilla Creek_Janamba Muk Muk Mugalimba	519.3080248	11.57435133	660.4663683	0.734812677	1	0.083004982	-0.361058319
WHNT Arafura Swamp Darbilla Creek	Janamba Swim Creek Station	WHNT Arafura Swamp Darbilla Creek_Janamba Swim Creek Station	355.7716991	7.441027776	526.9822865	0.733607987	1	0.084163708	-0.369210765
WHNT Arafura Swamp Darbilla Creek	Walker Beatrice Hill Station	WHNT Arafura Swamp Darbilla Creek_Walker Beatrice Hill Station	415.0604135	9.044880873	579.706099	0.735306051	1	0.082350889	-0.319218044
WHNT Arafura Swamp Darbilla Creek	WHNT Adelaide River Station	WHNT Arafura Swamp Darbilla Creek_WHNT Adelaide River Station	412.7626319	7.709414444	695.8953581	0.735540582	1	0.074590108	-0.333545748
WHNT Arafura Swamp Darbilla Creek	WHNT Elizabeth Downs Station	WHNT Arafura Swamp Darbilla Creek_WHNT Elizabeth Downs Station	520.3433585	8.819576939	774.7269089	0.733720273	1	0.083637857	-0.359995639
WHNT Arafura Swamp Darbilla Creek	WHNT King River Goomadeer River	WHNT Arafura Swamp Darbilla Creek_WHNT King River Goomadeer River	157.5808612	5.637980291	178.3026095	0.747085546	0	0.070440114	-0.285629996
WHNT Arafura Swamp Darbilla Creek	WHNT Labelle Downs Station	WHNT Arafura Swamp Darbilla Creek_WHNT Labelle Downs Station	525.8487971	10.84105154	680.059989	0.733809315	1	0.082409292	-0.365003739
WHNT Arafura Swamp Darbilla Creek	WHNT Litchfield Station	WHNT Arafura Swamp Darbilla Creek_WHNT Litchfield Station	504.6284558	8.624514491	1026.786719	0.737586395	1	0.080532811	-0.366948663
WHNT Arafura Swamp Darbilla Creek	WHNT Maningrida Bawinanga Liverpool Rv Blyth Rv	WHNT Arafura Swamp Darbilla Creek_WHNT Maningrida Bawinanga Liverpool Rv Blyth Rv	87.22835784	4.815801876	454.8729757	0.751071741	0	0.067445882	-0.264200489
WHNT Arafura Swamp Darbilla Creek	WHNT Tiwi Islands	WHNT Arafura Swamp Darbilla Creek_WHNT Tiwi Islands	478.6524157	28.15692386	553.0202416	0.733882042	1	0.080012341	-0.337928704
WHNT Arafura Swamp Darbilla Creek	WHNT Wagait Finniss River	WHNT Arafura Swamp Darbilla Creek_WHNT Wagait Finniss River	507.4639878	10.62508929	658.9939352	0.734283278	1	0.081031083	-0.352932417
WHNT Arafura Swamp Darbilla Creek	WHNT Welltree Station	WHNT Arafura Swamp Darbilla Creek_WHNT Welltree Station	500.7392659	8.573010636	806.3347794	0.769964355	1	0.059870697	-0.208922965
WHNT Arafura Swamp Darbilla Creek	WMI Djukbinj National Park	WHNT Arafura Swamp Darbilla Creek_WMI Djukbinj National Park	403.1275963	14.3881518	551.659159	0.734636996	1	0.085266878	-0.405250745
WHNT Arafura Swamp Darbilla Creek	WMI Harrison Dam	WHNT Arafura Swamp Darbilla Creek_WMI Harrison Dam	406.4619258	9.163507188	567.2128134	0.739429748	1	0.069948824	-0.084627637
WHNT Arafura Swamp Darbilla Creek	WMI Koolpinyah Station	WHNT Arafura Swamp Darbilla Creek_WMI Koolpinyah Station	420.1097745	8.262242471	556.3417135	0.745688509	1	0.066389152	-0.077544222
WHNT Elizabeth Downs Station	Janamba Muk Muk Mugalimba	WHNT Elizabeth Downs Station_Janamba Muk Muk Mugalimba	102.0139261	3.998129521	116.300686	0.774338813	0	0.052748726	-0.009848906
WHNT Elizabeth Downs Station	Janamba Swim Creek Station	WHNT Elizabeth Downs Station_Janamba Swim Creek Station	225.7741162	2.3316722	332.7712252	0.752397387	0	0.070464847	-0.103951416
WHNT Elizabeth Downs Station	WHNT King River Goomadeer River	WHNT Elizabeth Downs Station_WHNT King River Goomadeer River	421.5770861	4.111021275	639.910761	0.74723895	1	0.069677066	-0.095137791
WHNT Elizabeth Downs Station	WHNT Labelle Downs Station	WHNT Elizabeth Downs Station_WHNT Labelle Downs Station	85.34647468	3.241726587	94.66691989	0.773727565	0	0.05516433	-0.033238984
WHNT Elizabeth Downs Station	WHNT Litchfield Station	WHNT Elizabeth Downs Station_WHNT Litchfield Station	56.36946142	0.602910059	376.2928461	0.772089323	0	0.054480391	-0.015607269
WHNT Elizabeth Downs Station	WHNT Maningrida Bawinanga Liverpool Rv Blyth Rv	WHNT Elizabeth Downs Station_WHNT Maningrida Bawinanga Liverpool Rv Blyth Rv	462.2443109	4.672090791	986.4563005	0.74065606	1	0.073709798	-0.112125254
WHNT Elizabeth Downs Station	WHNT Tiwi Islands	WHNT Elizabeth Downs Station_WHNT Tiwi Islands	263.8789691	21.6721184	394.9825098	0.751960053	0	0.067917737	-0.082445238
WHNT King River Goomadeer River	Janamba Swim Creek Station	WHNT King River Goomadeer River_Janamba Swim Creek Station	220.1555809	2.719085312	392.1661386	0.743252981	1	0.072469313	-0.12075004
WHNT King River Goomadeer River	WHNT Maningrida Bawinanga Liverpool Rv Blyth Rv	WHNT King River Goomadeer River_WHNT Maningrida Bawinanga Liverpool Rv Blyth Rv	70.35974194	1.158449096	390.0320011	0.749544661	0	0.063505321	-0.05132675
WHNT King River Goomadeer River	WHNT Tiwi Islands	WHNT King River Goomadeer River_WHNT Tiwi Islands	327.770419	23.43908406	418.2040937	0.743553576	1	0.069844035	-0.093875076
WHNT Labelle Downs Station	Janamba Muk Muk Mugalimba	WHNT Labelle Downs Station_Janamba Muk Muk Mugalimba	18.71341898	5.103380233	21.63376614	0.768280776	0	0.058113834	-0.047961319
WHNT Labelle Downs Station	Janamba Swim Creek Station	WHNT Labelle Downs Station_Janamba Swim Creek Station	190.397159	4.19900814	238.1043053	0.750518711	0	0.07093093	-0.118044026
WHNT Labelle Downs Station	WHNT Elizabeth Downs Station	WHNT Labelle Downs Station_WHNT Elizabeth Downs Station	85.34647468	3.241726587	94.66691989	0.772847202	0	0.059140731	-0.040387232
WHNT Labelle Downs Station	WHNT King River Goomadeer River	WHNT Labelle Downs Station_WHNT King River Goomadeer River	406.3482364	6.123211746	545.2438412	0.744109871	1	0.06999588	-0.108660491
WHNT Labelle Downs Station	WHNT Litchfield Station	WHNT Labelle Downs Station_WHNT Litchfield Station	36.35244676	2.646980162	346.7267297	0.773995883	0	0.057281538	-0.053062309
WHNT Labelle Downs Station	WHNT Maningrida Bawinanga Liverpool Rv Blyth Rv	WHNT Labelle Downs Station_WHNT Maningrida Bawinanga Liverpool Rv Blyth Rv	457.3496439	6.688896147	891.7893806	0.739561286	1	0.072971813	-0.120016546
WHNT Labelle Downs Station	WHNT Tiwi Islands	WHNT Labelle Downs Station_WHNT Tiwi Islands	188.2300551	23.13917574	303.5775478	0.750499784	0	0.067902942	-0.091514199
WHNT Labelle Downs Station	WHNT Wagait Finniss River	WHNT Labelle Downs Station_WHNT Wagait Finniss River	30.30205613	4.460194307	32.89258459	0.766586141	0	0.059250603	-0.053183149
WHNT Labelle Downs Station	WHNT Welltree Station	WHNT Labelle Downs Station_WHNT Welltree Station	26.35972243	2.452605339	128.0540999	0.735333227	0	0.079013581	-0.119960398
WHNT Litchfield Station	Janamba Muk Muk Mugalimba	WHNT Litchfield Station_Janamba Muk Muk Mugalimba	48.75868149	3.403383096	368.3604958	0.768107146	0	0.059093365	-0.066497568
WHNT Litchfield Station	Janamba Swim Creek Station	WHNT Litchfield Station_Janamba Swim Creek Station	183.8880838	1.995248162	584.831035	0.750075294	0	0.071731735	-0.134813731
WHNT Litchfield Station	WHNT Elizabeth Downs Station	WHNT Litchfield Station_WHNT Elizabeth Downs Station	56.36946142	0.602910059	376.2928461	0.771091571	0	0.059487727	-0.064276874
WHNT Litchfield Station	WHNT King River Goomadeer River	WHNT Litchfield Station_WHNT King River Goomadeer River	392.6209179	3.910869225	891.9705709	0.745774024	1	0.069892418	-0.119417268
WHNT Litchfield Station	WHNT Labelle Downs Station	WHNT Litchfield Station_WHNT Labelle Downs Station	36.35244676	2.646980162	346.7267297	0.769292937	0	0.058721336	-0.071656115
WHNT Litchfield Station	WHNT Maningrida Bawinanga Liverpool Rv Blyth Rv	WHNT Litchfield Station_WHNT Maningrida Bawinanga Liverpool Rv Blyth Rv	439.7175564	4.474511408	1238.51611	0.741185	1	0.072130821	-0.129055692
WHNT Litchfield Station	WHNT Tiwi Islands	WHNT Litchfield Station_WHNT Tiwi Islands	207.7517362	21.14291207	647.6429993	0.750247376	0	0.068476926	-0.110694036
WHNT Litchfield Station	WHNT Wagait Finniss River	WHNT Litchfield Station_WHNT Wagait Finniss River	52.65092715	2.575346316	379.6193143	0.771394088	0	0.057375271	-0.062222699
WHNT Litchfield Station	WHNT Welltree Station	WHNT Litchfield Station_WHNT Welltree Station	21.30496805	0.20255656	456.8128947	0.754959456	0	0.064181808	-0.057355801
WHNT Maningrida Bawinanga Liverpool Rv Blyth Rv	Janamba Swim Creek Station	WHNT Maningrida Bawinanga Liverpool Rv Blyth Rv_Janamba Swim Creek Station	278.2371844	3.288638793	738.711678	0.737821853	1	0.077075082	-0.139218948
WHNT Maningrida Bawinanga Liverpool Rv Blyth Rv	WHNT King River Goomadeer River	WHNT Maningrida Bawinanga Liverpool Rv Blyth Rv_WHNT King River Goomadeer River	70.35974194	1.158449096	390.0320011	0.749873602	0	0.064242086	-0.060996349
WHNT Maningrida Bawinanga Liverpool Rv Blyth Rv	WHNT Tiwi Islands	WHNT Maningrida Bawinanga Liverpool Rv Blyth Rv_WHNT Tiwi Islands	394.706343	24.00476846	764.7496332	0.737185032	1	0.074273879	-0.11357733
WHNT Tiwi Islands	Janamba Muk Muk Mugalimba	WHNT Tiwi Islands_Janamba Muk Muk Mugalimba	169.5515325	23.87227797	285.6293624	0.749909631	0	0.066306859	-0.070564854
WHNT Tiwi Islands	Janamba Swim Creek Station	WHNT Tiwi Islands_Janamba Swim Creek Station	140.8536514	21.50973045	233.2775063	0.746708095	0	0.070862444	-0.10450657
WHNT Tiwi Islands	WHNT Elizabeth Downs Station	WHNT Tiwi Islands_WHNT Elizabeth Downs Station	263.8789691	21.6721184	394.9825098	0.751106052	0	0.068358146	-0.079958468
WHNT Tiwi Islands	WHNT King River Goomadeer River	WHNT Tiwi Islands_WHNT King River Goomadeer River	327.770419	23.43908406	418.2040937	0.742631075	1	0.069288779	-0.081213461
WHNT Tiwi Islands	WHNT Labelle Downs Station	WHNT Tiwi Islands_WHNT Labelle Downs Station	188.2300551	23.13917574	303.5775478	0.747865655	0	0.068510002	-0.094743957
WHNT Tiwi Islands	WHNT Litchfield Station	WHNT Tiwi Islands_WHNT Litchfield Station	207.7517362	21.14291207	647.6429993	0.748981522	0	0.06780512	-0.09486517
WHNT Tiwi Islands	WHNT Maningrida Bawinanga Liverpool Rv Blyth Rv	WHNT Tiwi Islands_WHNT Maningrida Bawinanga Liverpool Rv Blyth Rv	394.706343	24.00476846	764.7496332	0.738716106	1	0.071331781	-0.085134565
WHNT Tiwi Islands	WHNT Wagait Finniss River	WHNT Tiwi Islands_WHNT Wagait Finniss River	158.9879759	22.92288247	284.99415	0.749301301	0	0.065808899	-0.073056529
WHNT Tiwi Islands	WHNT Welltree Station	WHNT Tiwi Islands_WHNT Welltree Station	186.6453008	20.96897948	429.8523382	0.738341649	0	0.076523761	-0.110411029
WHNT Wagait Finniss River	Janamba Muk Muk Mugalimba	WHNT Wagait Finniss River_Janamba Muk Muk Mugalimba	13.61503634	5.173611883	13.03963659	0.771270421	0	0.054369735	-0.021914941
WHNT Wagait Finniss River	Janamba Swim Creek Station	WHNT Wagait Finniss River_Janamba Swim Creek Station	164.7721028	3.98304589	217.0382515	0.754617363	0	0.067969506	-0.097773692
WHNT Wagait Finniss River	WHNT Elizabeth Downs Station	WHNT Wagait Finniss River_WHNT Elizabeth Downs Station	108.2941463	3.170092741	127.5595045	0.78075636	0	0.051237358	-0.00759512
WHNT Wagait Finniss River	WHNT King River Goomadeer River	WHNT Wagait Finniss River_WHNT King River Goomadeer River	383.1210055	5.907249496	524.1777874	0.745724341	1	0.069266207	-0.095359356
WHNT Wagait Finniss River	WHNT Labelle Downs Station	WHNT Wagait Finniss River_WHNT Labelle Downs Station	30.30205613	4.460194307	32.89258459	0.777020779	0	0.051338651	-0.023278808
WHNT Wagait Finniss River	WHNT Litchfield Station	WHNT Wagait Finniss River_WHNT Litchfield Station	52.65092715	2.575346316	379.6193143	0.770835227	0	0.055210359	-0.047568009
WHNT Wagait Finniss River	WHNT Maningrida Bawinanga Liverpool Rv Blyth Rv	WHNT Wagait Finniss River_WHNT Maningrida Bawinanga Liverpool Rv Blyth Rv	436.4532156	6.472933896	870.7233268	0.740234835	1	0.071693532	-0.106110247
WHNT Wagait Finniss River	WHNT Tiwi Islands	WHNT Wagait Finniss River_WHNT Tiwi Islands	158.9879759	22.92288247	284.99415	0.75204781	0	0.065833121	-0.077797113
WHNT Welltree Station	Janamba Muk Muk Mugalimba	WHNT Welltree Station_Janamba Muk Muk Mugalimba	31.20531074	3.209008273	147.9085565	0.733033731	0	0.082316833	-0.148852962
WHNT Welltree Station	Janamba Swim Creek Station	WHNT Welltree Station_Janamba Swim Creek Station	170.6752302	1.930967233	364.3790957	0.730781344	0	0.083796206	-0.166540973
WHNT Welltree Station	WHNT Elizabeth Downs Station	WHNT Welltree Station_WHNT Elizabeth Downs Station	77.66963591	0.797302985	206.7267866	0.732364164	0	0.085567869	-0.145428827
WHNT Welltree Station	WHNT King River Goomadeer River	WHNT Welltree Station_WHNT King River Goomadeer River	383.7544546	3.855170839	671.5186316	0.744654347	1	0.070826325	-0.094690791
WHNT Welltree Station	WHNT Labelle Downs Station	WHNT Welltree Station_WHNT Labelle Downs Station	26.35972243	2.452605339	128.0540999	0.734496568	0	0.08144541	-0.157529168
WHNT Welltree Station	WHNT Litchfield Station	WHNT Welltree Station_WHNT Litchfield Station	21.30496805	0.20255656	456.8128947	0.734281318	0	0.081602219	-0.173431238
WHNT Welltree Station	WHNT Maningrida Bawinanga Liverpool Rv Blyth Rv	WHNT Welltree Station_WHNT Maningrida Bawinanga Liverpool Rv Blyth Rv	433.3206563	4.42085524	1018.064171	0.753450161	1	0.065823066	-0.067311716
WHNT Welltree Station	WHNT Tiwi Islands	WHNT Welltree Station_WHNT Tiwi Islands	186.6453008	20.96897948	429.8523382	0.732273566	0	0.08120225	-0.135395127
WHNT Welltree Station	WHNT Wagait Finniss River	WHNT Welltree Station_WHNT Wagait Finniss River	32.09517752	2.380971493	159.167375	0.732343402	0	0.07907343	-0.144504694
WMI Djukbinj National Park	DEMED East Alligator River	WMI Djukbinj National Park_DEMED East Alligator River	168.6810322	9.142904415	177.1638963	0.760793197	0	0.062214177	-0.102112662
WMI Djukbinj National Park	Janamba Donalds Lagoon Station	WMI Djukbinj National Park_Janamba Donalds Lagoon Station	37.24363417	8.301283105	36.43972163	0.754262789	0	0.065177009	-0.109864338
WMI Djukbinj National Park	Janamba Muk Muk Mugalimba	WMI Djukbinj National Park_Janamba Muk Muk Mugalimba	130.1621341	10.98136855	183.7431703	0.755929322	0	0.067225834	-0.135724419
WMI Djukbinj National Park	Janamba Swim Creek Station	WMI Djukbinj National Park_Janamba Swim Creek Station	49.3093308	7.740936855	51.5905228	0.751180243	0	0.070831359	-0.158788132
WMI Djukbinj National Park	Walker Beatrice Hill Station	WMI Djukbinj National Park_Walker Beatrice Hill Station	28.48397029	8.374513981	28.04824908	0.766183463	0	0.060721746	-0.088133954
WMI Djukbinj National Park	WHNT Adelaide River Station	WMI Djukbinj National Park_WHNT Adelaide River Station	42.24896332	7.039020913	144.2383601	0.762506259	0	0.053951906	-0.041657976
WMI Djukbinj National Park	WHNT Arafura Swamp Darbilla Creek	WMI Djukbinj National Park_WHNT Arafura Swamp Darbilla Creek	403.1275963	14.3881518	551.659159	0.734954576	1	0.079605085	-0.403622281
WMI Djukbinj National Park	WHNT Elizabeth Downs Station	WMI Djukbinj National Park_WHNT Elizabeth Downs Station	188.9160816	8.448851624	298.003711	0.755296567	0	0.068518845	-0.140426325
WMI Djukbinj National Park	WHNT King River Goomadeer River	WMI Djukbinj National Park_WHNT King River Goomadeer River	269.4612975	9.670311998	416.8430111	0.745647093	1	0.070026804	-0.146323854
WMI Djukbinj National Park	WHNT Labelle Downs Station	WMI Djukbinj National Park_WHNT Labelle Downs Station	143.545867	10.24809783	203.3367911	0.754372159	0	0.067935575	-0.143409396
WMI Djukbinj National Park	WHNT Litchfield Station	WMI Djukbinj National Park_WHNT Litchfield Station	141.5598628	8.044435756	550.0635208	0.754157566	0	0.068023274	-0.155320377
WMI Djukbinj National Park	WHNT Maningrida Bawinanga Liverpool Rv Blyth Rv	WMI Djukbinj National Park_WHNT Maningrida Bawinanga Liverpool Rv Blyth Rv	326.9132816	10.2359964	763.3885506	0.74105024	1	0.072814933	-0.156954061
WMI Djukbinj National Park	WHNT Tiwi Islands	WMI Djukbinj National Park_WHNT Tiwi Islands	116.8471058	27.42274481	238.1646801	0.751144265	0	0.067712547	-0.130603309
WMI Djukbinj National Park	WHNT Wagait Finniss River	WMI Djukbinj National Park_WHNT Wagait Finniss River	116.6254992	10.03209044	182.2707373	0.754672606	0	0.066135794	-0.133049992
WMI Djukbinj National Park	WHNT Welltree Station	WMI Djukbinj National Park_WHNT Welltree Station	125.9929255	7.980096809	329.6115815	0.734056468	0	0.083491793	-0.208604327
WMI Djukbinj National Park	WMI Harrison Dam	WMI Djukbinj National Park_WMI Harrison Dam	16.83987489	8.393906551	15.5548539	0.767792854	0	0.04254742	0.045950077
WMI Djukbinj National Park	WMI Koolpinyah Station	WMI Djukbinj National Park_WMI Koolpinyah Station	17.43870352	7.519826555	18.78762325	0.769089735	0	0.04459408	0.049863852
WMI Harrison Dam	DEMED East Alligator River	WMI Harrison Dam_DEMED East Alligator River	176.4895225	3.918259808	192.7175506	0.76642496	0	0.053922708	-0.01813258
WMI Harrison Dam	Janamba Muk Muk Mugalimba	WMI Harrison Dam_Janamba Muk Muk Mugalimba	119.8000296	5.10056933	196.8279068	0.762083031	0	0.057907931	-0.040762174
WMI Harrison Dam	Janamba Swim Creek Station	WMI Harrison Dam_Janamba Swim Creek Station	58.54877005	2.516313783	67.14417716	0.76083199	0	0.058288038	-0.04990938
WMI Harrison Dam	Walker Beatrice Hill Station	WMI Harrison Dam_Walker Beatrice Hill Station	12.61066186	2.196591006	12.49347757	0.771124629	0	0.051095953	0.000651319
WMI Harrison Dam	WHNT Adelaide River Station	WMI Harrison Dam_WHNT Adelaide River Station	25.40909128	1.454119384	128.6842499	0.764769038	0	0.048752008	0.032344104
WMI Harrison Dam	WHNT Arafura Swamp Darbilla Creek	WMI Harrison Dam_WHNT Arafura Swamp Darbilla Creek	406.4619258	9.163507188	567.2128134	0.739118157	1	0.072361414	-0.331647799
WMI Harrison Dam	WHNT Elizabeth Downs Station	WMI Harrison Dam_WHNT Elizabeth Downs Station	172.9984699	2.75218011	311.0884474	0.761673207	0	0.058299602	-0.041384748
WMI Harrison Dam	WHNT King River Goomadeer River	WMI Harrison Dam_WHNT King River Goomadeer River	276.9462003	4.445667391	432.3966655	0.752463041	1	0.060008042	-0.034101817
WMI Harrison Dam	WHNT Labelle Downs Station	WMI Harrison Dam_WHNT Labelle Downs Station	131.853561	4.36740809	216.4215276	0.75916765	0	0.058797403	-0.050085221
WMI Harrison Dam	WHNT Litchfield Station	WMI Harrison Dam_WHNT Litchfield Station	127.0822455	2.223070083	563.1482573	0.758935042	0	0.058997612	-0.063540636
WMI Harrison Dam	WHNT Maningrida Bawinanga Liverpool Rv Blyth Rv	WMI Harrison Dam_WHNT Maningrida Bawinanga Liverpool Rv Blyth Rv	332.2134004	5.011351792	778.9422049	0.746198273	1	0.062520764	-0.043553139
WMI Harrison Dam	WHNT Tiwi Islands	WMI Harrison Dam_WHNT Tiwi Islands	129.4083737	21.26205112	253.7183344	0.758654853	0	0.056811397	-0.016967322
WMI Harrison Dam	WHNT Wagait Finniss River	WMI Harrison Dam_WHNT Wagait Finniss River	106.5154468	4.151220474	195.3554738	0.758805615	0	0.059464563	-0.041129369
WMI Harrison Dam	WHNT Welltree Station	WMI Harrison Dam_WHNT Welltree Station	112.6456516	2.119783477	342.696318	0.736154906	0	0.07494779	-0.111549016
WMI Harrison Dam	WMI Djukbinj National Park	WMI Harrison Dam_WMI Djukbinj National Park	16.83987489	8.393906551	15.5548539	0.781222423	0	0.04663564	-0.027449205
WMI Harrison Dam	WMI Koolpinyah Station	WMI Harrison Dam_WMI Koolpinyah Station	24.90285529	1.359132868	25.16568142	0.773192027	0	0.046878681	0.052287201
WMI Koolpinyah Station	DEMED East Alligator River	WMI Koolpinyah Station_DEMED East Alligator River	184.2226279	3.016995091	190.7402908	0.764091197	0	0.057107739	-0.030199769
WMI Koolpinyah Station	Janamba Muk Muk Mugalimba	WMI Koolpinyah Station_Janamba Muk Muk Mugalimba	118.2697892	4.03881029	179.3560505	0.758672014	0	0.057625863	-0.045769429
WMI Koolpinyah Station	Janamba Swim Creek Station	WMI Koolpinyah Station_Janamba Swim Creek Station	65.15803246	1.615049066	65.16691731	0.758124156	0	0.05732416	-0.053023743
WMI Koolpinyah Station	Walker Beatrice Hill Station	WMI Koolpinyah Station_Walker Beatrice Hill Station	30.83930558	1.344054151	36.83729393	0.762221423	0	0.053918045	-0.027976578
WMI Koolpinyah Station	WHNT Adelaide River Station	WMI Koolpinyah Station_WHNT Adelaide River Station	46.58180278	0.552854666	153.028287	0.766397125	0	0.050134771	0.03173191
WMI Koolpinyah Station	WHNT Arafura Swamp Darbilla Creek	WMI Koolpinyah Station_WHNT Arafura Swamp Darbilla Creek	420.1097745	8.262242471	556.3417135	0.746035278	1	0.068258253	-0.347976576
WMI Koolpinyah Station	WHNT Elizabeth Downs Station	WMI Koolpinyah Station_WHNT Elizabeth Downs Station	185.1614057	1.826625227	293.6165911	0.758686898	0	0.056806281	-0.044437992
WMI Koolpinyah Station	WHNT King River Goomadeer River	WMI Koolpinyah Station_WHNT King River Goomadeer River	284.9810851	3.544402674	421.5255656	0.752186075	1	0.058297854	-0.027466176
WMI Koolpinyah Station	WHNT Labelle Downs Station	WMI Koolpinyah Station_WHNT Labelle Downs Station	132.9117638	3.305708053	198.9496712	0.759354039	0	0.056237122	-0.044539224
WMI Koolpinyah Station	WHNT Litchfield Station	WMI Koolpinyah Station_WHNT Litchfield Station	134.8988502	1.297495212	545.6764009	0.758185581	0	0.057302984	-0.060960456
WMI Koolpinyah Station	WHNT Maningrida Bawinanga Liverpool Rv Blyth Rv	WMI Koolpinyah Station_WHNT Maningrida Bawinanga Liverpool Rv Blyth Rv	343.3403723	4.110087074	768.071105	0.748761769	1	0.060620994	-0.031428268
WMI Koolpinyah Station	WHNT Tiwi Islands	WMI Koolpinyah Station_WHNT Tiwi Islands	104.6298553	19.93587054	242.8385153	0.760870226	0	0.053453969	-0.006287055
WMI Koolpinyah Station	WHNT Wagait Finniss River	WMI Koolpinyah Station_WHNT Wagait Finniss River	104.6547646	3.089414782	177.8836175	0.760706524	0	0.057675314	-0.033432002
WMI Koolpinyah Station	WHNT Welltree Station	WMI Koolpinyah Station_WHNT Welltree Station	117.6842665	1.123623525	325.2244616	0.742769894	0	0.068977906	-0.088464031
WMI Koolpinyah Station	WMI Djukbinj National Park	WMI Koolpinyah Station_WMI Djukbinj National Park	17.43870352	7.519826555	18.78762325	0.76248335	0	0.057167881	-0.096769765
