# Supplementary material for: Translocation, genetic structure and homing ability confirm geographic barriers disrupt saltwater crocodile movement and dispersal
Source: PLoS One. 2019 Aug 28;14(8):e0205862. doi: 10.1371/journal.pone.0205862 (PMC6713319; doi:10.1371/journal.pone.0205862)
Supplement: S1 File — (ZIP) [file pone.0205862.s001.zip › Cobourg croc paper genetic analyses/R SCRIPT - IBD + Cobourg MLPE model fitting.txt]

#R script by Sam Banks to fit corMLPE models for crocodile data individual kinship (IBS) using KING ROBUST kinship and IBS from snpRelate

source('R SCRIPT - corMLPE_unsupp.R')

#From https://github.com/nspope/corMLPE_unsupported

#From Nathaniel Pope's (nspope) Github site. The old (corMLPE_unsupported) version allows for incomplete distance matrices if some comparisons need to be excluded
#Didn't need this in the end but I started with it as I originally used individual kinship values and wanted to exclude same-population comparisons from the models
#However, switched to mean pairwise IBS between pops in the end

#Ecological distances created in separate script ("R SCRIPT - Create cost distance matrix.R")
#Dist is raw distance
#Cob_span indicates different(1) or same (0) side of Cobourg Peninsula
#Cost_dist is incorrect
#Cost_dist2 is the correct least cost distance with resistance surface land = 100 and all water in wet season = 1

###################
#Read dat aand plot geographic patterns

popdist<-read.csv("popdist.csv")
head(popdist)


#PLot stuff
library(ggplot2)
plot(popdist$Dist, popdist$kinship, xlab="Distance",ylab="Kinship", col = ifelse(popdist$Cob_span == 0,'green','blue'), pch = 19,cex=0.6)
plot(popdist$Dist, popdist$IBS, xlab="Distance",ylab="IBS", col = ifelse(popdist$Cob_span == 1,'blue','green'), pch = 1,cex=0.6)
plot(popdist$Cost_dist2, popdist$IBS, xlab="Cost Distance",ylab="IBS", col = ifelse(popdist$Cob_span == 1,'blue','green'), pch = 20,cex=0.8)


##################################
First models using KING Rubust kinship

test.fit.gls <- gls(kinship ~ Dist + Cob_span, correlation = corMLPE(form = ~ Pop1 + Pop2), data = popdist)
plot(augPred(test.fit.gls, primary = ~ Dist),col = ifelse(popdist$Cob_span == 0,'green','blue'), pch = 19 )
summary(test.fit.gls)

Z <- corZ(test.fit.gls) #extract correlation structure from previous fit

## re-using correlation structure
gls(y ~ distz, correlation = corMLPE(value = 0.2, form = ~ Pop1 + Pop2, Z = Z), data = popdist)


test.fit.glsb <- gls(kinship ~ Dist, correlation = corMLPE(value = 0.2, form = ~ Pop1 + Pop2, Z = Z), data = popdist)
 plot(augPred(test.fit.glsb, primary = ~ Dist))
summary(test.fit.glsb)

test.fit.glsc <- gls(kinship ~ Cob_span, correlation = corMLPE(value = 0.2, form = ~ Pop1 + Pop2, Z = Z), data = popdist)
 plot(augPred(test.fit.glsc, primary = ~ Dist))
summary(test.fit.glsc)

test.fit.glsd <- gls(kinship ~ 1, correlation = corMLPE(value = 0.2, form = ~ Pop1 + Pop2, Z = Z), data = popdist)
 plot(augPred(test.fit.glsd, primary = ~ Dist))
summary(test.fit.glsd)

test.fit.glse <- gls(kinship ~ Cost_dist2 + Cob_span, correlation = corMLPE(value = 0.2, form = ~ Pop1 + Pop2, Z = Z), data = popdist)
 plot(augPred(test.fit.glsd, primary = ~ Cost_dist),col = ifelse(popdist$Cob_span == 0,'green','blue'), pch = 19)

summary(test.fit.glsd)

test.fit.glsf <- gls(kinship ~ Cost_dist2, correlation = corMLPE(value = 0.2, form = ~ Pop1 + Pop2, Z = Z), data = popdist)
 plot(augPred(test.fit.glsd, primary = ~ Dist))
summary(test.fit.glsd)


#################
#############
##########
#######
summary(test.fit.gls)
summary(test.fit.glsb)
summary(test.fit.glsc)
summary(test.fit.glsd)
summary(test.fit.glse)
summary(test.fit.glsf)

AIC(test.fit.gls)#Raw dist+Cob
AIC(test.fit.glsb)#Raw Dist
AIC(test.fit.glsc)#Cob
AIC(test.fit.glsd)#Int
AIC(test.fit.glse)#Cost_dist+Cob
AIC(test.fit.glsf)#Cost_dist

###################
#Repeat for IBS as pairwise genetic response

test.fit.gls_IBS <- gls(IBS ~ Dist + Cob_span, correlation = corMLPE(form = ~ Pop1 + Pop2), data = popdist)
plot(augPred(test.fit.gls_IBS, primary = ~ Dist),col = ifelse(popdist$Cob_span == 0,'green','blue'), pch = 19 )
summary(test.fit.gls_IBS)

Z <- corZ(test.fit.gls_IBS) #extract correlation structure from previous fit

## re-using correlation structure
gls(y ~ distz, correlation = corMLPE(value = 0.2, form = ~ Pop1 + Pop2, Z = Z), data = popdist)


test.fit.gls_IBSb <- gls(IBS ~ Dist, correlation = corMLPE(value = 0.2, form = ~ Pop1 + Pop2, Z = Z), data = popdist)
 plot(augPred(test.fit.gls_IBSb, primary = ~ Dist))
summary(test.fit.gls_IBSb)

test.fit.gls_IBSc <- gls(IBS ~ Cob_span, correlation = corMLPE(value = 0.2, form = ~ Pop1 + Pop2, Z = Z), data = popdist)
 plot(augPred(test.fit.gls_IBSc, primary = ~ Dist))
summary(test.fit.gls_IBSc)

test.fit.gls_IBSd <- gls(IBS ~ 1, correlation = corMLPE(value = 0.2, form = ~ Pop1 + Pop2, Z = Z), data = popdist)
 plot(augPred(test.fit.gls_IBSd, primary = ~ Dist))
summary(test.fit.gls_IBSd)

test.fit.gls_IBSe <- gls(IBS ~ Cost_dist2 + Cob_span, correlation = corMLPE(value = 0.2, form = ~ Pop1 + Pop2, Z = Z), data = popdist)
 plot(augPred(test.fit.gls_IBSd, primary = ~ Cost_dist2))
summary(test.fit.gls_IBSe)

test.fit.gls_IBSf <- gls(IBS ~ Cost_dist2, correlation = corMLPE(value = 0.2, form = ~ Pop1 + Pop2, Z = Z), data = popdist)
 plot(augPred(test.fit.gls_IBSd, primary = ~ Dist))
summary(test.fit.gls_IBSf)


#################
#############
##########
#######
summary(test.fit.gls_IBS)
summary(test.fit.gls_IBSb)
summary(test.fit.gls_IBSc)
summary(test.fit.gls_IBSd)
summary(test.fit.gls_IBSe)
summary(test.fit.gls_IBSf)

AIC(test.fit.gls_IBS)#Dist
AIC(test.fit.gls_IBSb)#Dist+Cob
AIC(test.fit.gls_IBSc)#Cob
AIC(test.fit.gls_IBSd)#Int
AIC(test.fit.gls_IBSe)#Cost_dist+Cob
AIC(test.fit.gls_IBSf)#Cost_dist


##############################################################################################################################
#Try again by restricting distances to window where there is equal representation (400-750)

popdist2a<-popdist[popdist$Cost_dist2>400,]
popdist2<-popdist2a[popdist2a$Cost_dist2<750,]
dim(popdist)
dim(popdist2)

test.fit.gls_IBS2 <- gls(IBS ~ Dist + Cob_span, correlation = corMLPE(form = ~ Pop1 + Pop2), data = popdist2)
plot(augPred(test.fit.gls_IBS2, primary = ~ Cost_dist2),col = ifelse(popdist2$Cob_span == 0,'green','blue'), pch = 19 )
summary(test.fit.gls_IBS2)

Z <- corZ(test.fit.gls_IBS2) #extract correlation structure from previous fit

## re-using correlation structure
gls(y ~ distz, correlation = corMLPE(value = 0.2, form = ~ Pop1 + Pop2, Z = Z), data = popdist2)


test.fit.gls_IBS2b <- gls(IBS ~ Dist, correlation = corMLPE(value = 0.2, form = ~ Pop1 + Pop2, Z = Z), data = popdist2)
 plot(augPred(test.fit.gls_IBS2b, primary = ~ Dist))
summary(test.fit.gls_IBS2b)

test.fit.gls_IBS2c <- gls(IBS ~ Cob_span, correlation = corMLPE(value = 0.2, form = ~ Pop1 + Pop2, Z = Z), data = popdist2)
 plot(augPred(test.fit.gls_IBS2c, primary = ~ Dist))
summary(test.fit.gls_IBS2c)

test.fit.gls_IBS2d <- gls(IBS ~ 1, correlation = corMLPE(value = 0.2, form = ~ Pop1 + Pop2, Z = Z), data = popdist2)
 plot(augPred(test.fit.gls_IBS2d, primary = ~ Dist))
summary(test.fit.gls_IBS2d)

test.fit.gls_IBS2e <- gls(IBS ~ Cost_dist2 + Cob_span, correlation = corMLPE(value = 0.2, form = ~ Pop1 + Pop2, Z = Z), data = popdist2)
 plot(augPred(test.fit.gls_IBS2d, primary = ~ Cost_dist2))
summary(test.fit.gls_IBS2e)

test.fit.gls_IBS2f <- gls(IBS ~ Cost_dist2, correlation = corMLPE(value = 0.2, form = ~ Pop1 + Pop2, Z = Z), data = popdist2)
 plot(augPred(test.fit.gls_IBS2d, primary = ~ Cost_dist2))
summary(test.fit.gls_IBS2f)


#################
#############
##########
#######
summary(test.fit.gls_IBS2)
summary(test.fit.gls_IBS2b)
summary(test.fit.gls_IBS2c)
summary(test.fit.gls_IBS2d)
summary(test.fit.gls_IBS2e)
summary(test.fit.gls_IBS2f)

AIC(test.fit.gls_IBS2)#Dist
AIC(test.fit.gls_IBS2b)#Dist+Cob
AIC(test.fit.gls_IBS2c)#Cob
AIC(test.fit.gls_IBS2d)#Int
AIC(test.fit.gls_IBS2e)#Cost_dist+Cob
AIC(test.fit.gls_IBS2f)#Cost_dist
