# Supplementary material for: Translocation, genetic structure and homing ability confirm geographic barriers disrupt saltwater crocodile movement and dispersal
Source: PLoS One. 2019 Aug 28;14(8):e0205862. doi: 10.1371/journal.pone.0205862 (PMC6713319; doi:10.1371/journal.pone.0205862)
Supplement: S1 File — (ZIP) [file pone.0205862.s001.zip › Cobourg croc paper genetic analyses/Report_DCroc17-2955_1_moreOrders_SNP_singlerow_1_Cob_paper.csv]

*	*	*	*	*	*	*	*	*	*	*	*	*	*	*	*	*	*	*	*	*	DCroc16-2532	DCroc16-2532	DCroc16-2532	DCroc16-2532	DCroc16-2532	DCroc16-2532	DCroc16-2532	DCroc16-2532	DCroc16-2532	DCroc16-2532	DCroc16-2532	DCroc16-2532	DCroc16-2532	DCroc16-2532	DCroc16-2532	DCroc16-2532	DCroc16-2532	DCroc16-2532	DCroc16-2532	DCroc16-2532	DCroc16-2532	DCroc16-2532	DCroc16-2532	DCroc16-2532	DCroc16-2532	DCroc16-2532	DCroc16-2532	DCroc16-2532	DCroc16-2532
*	*	*	*	*	*	*	*	*	*	*	*	*	*	*	*	*	*	*	*	*	9.09416E+11	9.09416E+11	9.09416E+11	9.09416E+11	9.09416E+11	9.09416E+11	9.09416E+11	9.09416E+11	9.09416E+11	9.09416E+11	9.09416E+11	9.09416E+11	9.09416E+11	9.09416E+11	9.09416E+11	9.09416E+11	9.09416E+11	9.09416E+11	9.09416E+11	9.09416E+11	9.09416E+11	9.09416E+11	9.09416E+11	9.09416E+11	9.09416E+11	9.09416E+11	9.09416E+11	9.09416E+11	9.09416E+11
*	*	*	*	*	*	*	*	*	*	*	*	*	*	*	*	*	*	*	*	*	1	1	1	1	1	1	1	1	1	1	1	1	1	1	1	1	1	1	2	2	2	2	2	2	2	3	3	3	3
*	*	*	*	*	*	*	*	*	*	*	*	*	*	*	*	*	*	*	*	*	A	B	E	F	F	G	H	A	B	C	C	D	D	E	G	H	A	B	A	C	D	E	F	G	H	A	B	C	D
*	*	*	*	*	*	*	*	*	*	*	*	*	*	*	*	*	*	*	*	*	Coburg Murganella Creek	Coburg Murganella Creek	Coburg Murganella Creek	Coburg Murganella Creek	Coburg Murganella Creek	Coburg Murganella Creek	Coburg Murganella Creek	Coburg Murganella Creek	Coburg Murganella Creek	Coburg Murganella Creek	Coburg Murganella Creek	Coburg Murganella Creek	Coburg Murganella Creek	Coburg Murganella Creek	Coburg Murganella Creek	Coburg Murganella Creek	Adelaide River assorted	Adelaide River assorted	Finniss River assorted	Finniss River assorted	Finniss River assorted	Finniss River assorted	Finniss River assorted	Finniss River assorted	Finniss River assorted	Mary River assorted	Mary River assorted	Mary River assorted	Mary River assorted
*	*	*	*	*	*	*	*	*	*	*	*	*	*	*	*	*	*	*	*	*	DEMED East Alligator River (Janamba)	DEMED East Alligator River (Janamba)	DEMED East Alligator River (Janamba)	DEMED East Alligator River (Janamba)	DEMED East Alligator River (Janamba)	DEMED East Alligator River (Janamba)	DEMED East Alligator River (Janamba)	Janamba Coburg Peninsula	Janamba Coburg Peninsula	Janamba Coburg Peninsula	Janamba Coburg Peninsula	Janamba Coburg Peninsula	Janamba Coburg Peninsula	Janamba Coburg Peninsula	Janamba Coburg Peninsula	Janamba Coburg Peninsula	Janamba Donalds Lagoon Station	Janamba Donalds Lagoon Station	Janamba Muk Muk Mugalimba	Janamba Muk Muk Mugalimba	Janamba Muk Muk Mugalimba	Janamba Muk Muk Mugalimba	Janamba Muk Muk Mugalimba	Janamba Muk Muk Mugalimba	Janamba Muk Muk Mugalimba	Janamba Swim Creek Station	Janamba Swim Creek Station	Janamba Swim Creek Station	Janamba Swim Creek Station
AlleleID	AlleleSequence	TrimmedSequence	Chrom_CroCPdile_ncbi_v2	ChromPos_CroCPdile_ncbi_v2	AlnCnt_CroCPdile_ncbi_v2	AlnEvalue_CroCPdile_ncbi_v2	SNP	SnpPosition	CallRate	OneRatioRef	OneRatioSnp	FreqHomRef	FreqHomSnp	FreqHets	PICRef	PICSnp	AvgPIC	AvgCPuntRef	AvgCPuntSnp	RepAvg	CP0218	CP0219	CP0003	CP0004	CP0229	CP0230	CP0217	CP0232	CP0234	CP0235	CP0221	CP0002	CP0222	CP0223	CP0008	CP0231	CP0001	CP0007	CP0239	CP0220	CP0225	CP0233	CP0236	CP0237	CP0238	CP0010	CP0224	CP0226	CP0227
23113928|F|0-12:G>A-12:G>A	TGCAGCCTCAGTGCCCAGCCACCTTTCCCCAGCTCCGGCTGGCACCTACCACCCCACCTCATGCATATA	TGCAGCCTCAGTGCCCAGCCACCTTTCCCCAGCTCCGGCTGGCACCTACCACCCCACCTCATGCATATA	KN277798.1_scaffold-27	841518	1	1.84E-28	12:G>A	12	0.991979	0.994609	0.037736	0.962264	0.005391	0.032345	0.010724	0.072624	0.041674	6.33909	4.26667	1	0	0	0	0	0	0	0	0	0	2	0	0	0	0	0	0	0	0	0	0	0	0	0	0	0	0	0	0	0
23118506|F|0-24:C>T-24:C>T	TGCAGTTTTCCAGCGTACCATAGGCCCCTTCTCTGATTAATGAGCATGAGCGGTTCAGCAGGAATGCCG	TGCAGTTTTCCAGCGTACCATAGGCCCCTTCTCTGATTAATGAGCATG	KN286942.1_scaffold-13048	243287	1	4.65E-17	24:C>T	24	0.983957	0.997283	0.046196	0.953804	0.002717	0.043478	0.00542	0.088123	0.046772	13.30283	7.79167	1	0	0	0	0	0	0	0	0	0	0	0	0	0	0	0	0	0	0	0	0	0	0	0	0	0	0	0	0	0
23111041|F|0-27:G>A-27:G>A	TGCAGAAAAAGACCTGACGGTTACAGCGGACCATAAACTGAATACGAGCCAATGGTGTGCCTTTGTTGT	TGCAGAAAAAGACCTGACGGTTACAGCGGACCATAAACTGAATACGAGCCAATGGTGTGCCTTTGTTGT	JRXG01071562.1_scaffold-14248_1	10306	1	1.84E-28	27:G>A	27	0.986631	0.99729	0.062331	0.937669	0.00271	0.059621	0.005405	0.116891	0.061148	9.50652	4.25	1	0	0	0	0	2	0	0	0	0	0	0	0	0	0	0	0	0	0	0	0	0	0	0	0	0	0	0	0	0
23111042|F|0-19:G>T-19:G>T	TGCAGAAAAAGACCTGGGGGCTACAGTGAACAATAAGCTGGATATGAGTATGAGTCAACAGCATGAGCG	TGCAGAAAAAGACCTGGGGGCTACAGTGAACAATAAGCTGGATATGAGTATGAGTCAACAGCATG	JRXG01081812.1_scaffold-16436_1	9673	1	2.80E-26	19:G>T	19	0.986631	1	0.00542	0.99458	0	0.00542	0	0.010781	0.005391	8.41215	5	1	0	0	0	0	0	0	0	0	0	0	0	0	0	0	0	0	0	0	0	0	0	0	0	0	0	0	0	0	0
23111045|F|0-21:A>G-21:A>G	TGCAGAAAAATGGACCCCAGTACTATGCTCCAATTTAGGAGGTGCAGATCTGCATGAGCGGTTCAGCAG	TGCAGAAAAATGGACCCCAGTACTATGCTCCAATTTAGGAGGTGCAGATCTGCATG	KN293184.1_scaffold-22176	14775	1	2.17E-21	21:A>G	21	0.97861	1	0.002732	0.997268	0	0.002732	0	0.00545	0.002725	7.19348	3	1	0	0	0	0	0	0	0	0	0	0	0	0	0	0	0	0	0	0	0	0	0	0	0	0	0	0	0	0	0
23111056|F|0-19:T>C-19:T>C	TGCAGAAAAGGACAGGTTATAGCAGACAGTAAGACGGATACAAGTCAGCAGTGTGCCCTTGTTGCCAAG	TGCAGAAAAGGACAGGTTATAGCAGACAGTAAGACGGATACAAGTCAGCAGTGTGCCCTTGTTGCCAAG	KN289568.1_scaffold-16834	229043	9	1.84E-28	19:T>C	19	0.994652	1	0.018817	0.981183	0	0.018817	0	0.036926	0.018463	9.2591	5.77778	1	0	0	0	0	0	0	0	0	0	0	0	0	0	0	0	0	0	0	0	0	0	0	0	0	0	0	0	0	0
23111061|F|0-17:G>A-17:G>A	TGCAGAAAAGGACCCGGGGTTACAGTCAACAATAGAATATGAGCCAACAGCATGAGCGGTTCAGCAGGA	TGCAGAAAAGGACCCGGGGTTACAGTCAACAATAGAATATGAGCCAACAGCATG	KN287655.1_scaffold-14070	12641	1	2.62E-20	17:G>A	17	0.949198	0.991549	0.067606	0.932394	0.008451	0.059155	0.016759	0.12607	0.071414	8.49321	5.44444	1	0	0	0	0	0	0	0	2	0	0	0	0	0	0	0	0	0	0	0	0	2	0	0	0	0	0	0	0	0
23111085|F|0-33:G>A-33:G>A	TGCAGAAAATATTCACTAGTGTTGTTTCTGAACGCCTGGATACCCTGCATGAGCGGTTCAGCAGGAATG	TGCAGAAAATATTCACTAGTGTTGTTTCTGAACGCCTGGATACCCTGCATG	KN279530.1_scaffold-2464	357441	1	1.09E-18	33:G>A	33	0.986631	0.99729	0.070461	0.929539	0.00271	0.067751	0.005405	0.130992	0.068199	10.5594	6.12903	1	0	0	0	0	0	0	0	0	0	0	0	0	0	0	0	0	0	0	0	0	0	0	0	0	0	0	0	0	0
23111088|F|0-33:T>A-33:T>A	TGCAGAAAATGACCTGGGAATTACGGTGGACAATAAGATGGATATAAGTCAGCAATGTGCCGTTGTTGC	TGCAGAAAATGACCTGGGAATTACGGTGGACAATAAGATGGATATAAGTCAGCAATGTGCCGTTGTTGC	KN278625.1_scaffold-1200	41949	10	1.84E-28	33:T>A	33	0.994652	1	0.008065	0.991935	0	0.008065	0	0.015999	0.007999	9.33833	7.33333	1	0	0	0	0	0	0	0	0	0	0	0	0	0	0	0	0	0	0	0	0	0	0	0	0	0	0	0	0	0
23111091|F|0-58:G>A-58:G>A	TGCAGAAAATTAAGTTCCATTTTCAAACATAACTTAAGCATTTAAGTCATTTGTACACGATTGCTCTGC	TGCAGAAAATTAAGTTCCATTTTCAAACATAACTTAAGCATTTAAGTCATTTGTACACGATTGCTCTGC	KN283320.1_scaffold-7839	32092	1	1.84E-28	58:G>A	58	0.983957	0.997283	0.057065	0.942935	0.002717	0.054348	0.00542	0.107618	0.056519	5.72885	3.10714	1	0	0	0	0	0	0	0	0	0	0	0	0	0	0	0	0	0	0	0	0	0	0	0	0	0	0	0	0	0
23111093|F|0-21:T>G-21:T>G	TGCAGAAAATTTTCATTAATGTAAAGAGTGCCTTGGACTGGAAACGATTAGGAAGCACTGGGTTAACAT	TGCAGAAAATTTTCATTAATGTAAAGAGTGCCTTGGACTGGAAACGATTAGGAAGCACTGGGTTAACAT	KN288843.1_scaffold-15767	5714	1	1.84E-28	21:T>G	21	0.975936	1	0.00274	0.99726	0	0.00274	0	0.005464	0.002732	4.84187	3	1	0	0	0	0	0	0	0	0	0	0	0	0	0	0	0	0	0	0	0	0	0	0	-	0	0	0	0	0	0
23111103|F|0-15:C>T-15:C>T	TGCAGAAACCGAGCACGTTTCACGTAACAAATCTTCGCCGACACTGCATGAGCGGTTCAGCAGGAATGC	TGCAGAAACCGAGCACGTTTCACGTAACAAATCTTCGCCGACACTGCATG	JRXG01098812.1_scaffold-20199_1	3396	1	3.91E-18	15:C>T	15	0.997326	0.994638	0.016086	0.983914	0.005362	0.010724	0.010666	0.031654	0.02116	9.92719	7	1	0	0	0	0	0	0	0	0	0	0	0	0	0	0	0	0	0	0	0	0	0	0	0	0	0	0	0	0	0
23111109|F|0-68:C>A-68:C>A	TGCAGAAACTAGAGGAGCTGTAGCCAGGGAGCAGAGGGGAGGGACCAGCCTGACTGTGGAGTAGAGAGC	TGCAGAAACTAGAGGAGCTGTAGCCAGGGAGCAGAGGGGAGGGACCAGCCTGACTGTGGAGTAGAGAGC	KN291755.1_scaffold-20052	93671	9	1.84E-28	68:C>A	68	1	0.991979	0.101604	0.898396	0.008021	0.093583	0.015914	0.182562	0.099238	7.58065	4.86667	1	0	0	0	0	0	0	0	0	0	0	0	0	0	0	0	0	0	0	0	0	0	0	0	0	0	0	0	0	0
23111119|F|0-60:A>C-60:A>C	TGCAGAAAGATTTCCATACAGCAATGTTTCTCCCACTCCATTTGTATCAGCTTCACATTTAATGAGAAA	TGCAGAAAGATTTCCATACAGCAATGTTTCTCCCACTCCATTTGTATCAGCTTCACATTTAATGAGAAA	KN289821.1_scaffold-17211	41285	1	1.84E-28	60:A>C	60	0.970588	1	0.024793	0.975207	0	0.024793	0	0.048357	0.024179	6.26164	3.84615	1	0	0	0	0	0	0	0	0	0	0	0	0	0	0	0	0	0	0	0	0	0	0	-	0	0	0	0	0	0
23111131|F|0-52:G>A-52:G>A	TGCAGAAAGTGGTGAGGGAGTGGGACTGGGGCTGGGGCTGCACAGCCAGGGAGGGGTCTGGGATGCAGC	TGCAGAAAGTGGTGAGGGAGTGGGACTGGGGCTGGGGCTGCACAGCCAGGGAGGGGTCTGGGATGCAGC	JRXG01001760.1_scaffold-314_1	1006	1	1.84E-28	52:G>A	52	0.991979	1	0.010782	0.989218	0	0.010782	0	0.021331	0.010665	9.25702	4.75	1	0	0	0	0	0	0	0	0	0	0	0	0	0	0	0	0	0	0	0	0	0	0	0	0	0	0	0	0	0
23111134|F|0-34:A>T-34:A>T	TGCAGAAATATGTCAAGAGCCAGTGATGCTGTACAGCACATCCTAGCTGAATGGGTAAGGAAGCATGAG	TGCAGAAATATGTCAAGAGCCAGTGATGCTGTACAGCACATCCTAGCTGAATGGGTAAGGAAGCATGAG	KN285435.1_scaffold-10858	449851	1	2.38E-27	34:A>T	34	0.986631	1	0.00271	0.99729	0	0.00271	0	0.005405	0.002703	12.02581	5	1	0	0	0	0	0	0	0	0	0	0	0	0	0	0	0	0	0	0	0	0	0	0	0	0	0	0	0	0	0
23111142|F|0-27:A>C-27:A>C	TGCAGAAATGTAGGCCAGATGCCGGGGAGGGGTGGTGGCAACACTAAAGCATGAGCGGTTCAGCAGGAA	TGCAGAAATGTAGGCCAGATGCCGGGGAGGGGTGGTGGCAACACTAAAGCATG	KN292762.1_scaffold-21539	60943	1	9.08E-20	27:A>C	27	0.97861	0.997268	0.008197	0.991803	0.002732	0.005464	0.00545	0.016259	0.010854	10.31868	5.33333	1	0	0	0	0	0	0	0	0	0	0	0	2	0	0	0	0	0	0	0	0	0	0	0	0	0	0	0	0	0
23111149|F|0-25:C>T-25:C>T	TGCAGAACACAGCAACGCACAGACTCACCAAACTCACACTTGCCTACCTCACCGTTACCCCCTGGCTTG	TGCAGAACACAGCAACGCACAGACTCACCAAACTCACACTTGCCTACCTCACCGTTACCCCCTGGCTTG	KN278559.1_scaffold-1089	174158	1	1.84E-28	25:C>T	25	0.981283	0.99455	0.06812	0.93188	0.00545	0.06267	0.01084	0.126959	0.068899	6.13974	3.2069	1	0	0	0	0	0	0	0	0	0	0	0	0	0	0	0	0	0	0	0	0	0	0	0	0	0	0	0	0	0
23111156|F|0-45:C>T-45:C>T	TGCAGAACAGCTACTCCAACCATTAATAACCAAATGAGTCGCTTCCACTTTATGCATGAGCGGTTCAGC	TGCAGAACAGCTACTCCAACCATTAATAACCAAATGAGTCGCTTCCACTTTATGCATG	KN286284.1_scaffold-12082	1146	1	1.79E-22	45:C>T	45	0.983957	1	0.040761	0.959239	0	0.040761	0	0.078199	0.039099	9.18182	4.86667	1	0	0	0	0	0	0	0	0	0	0	0	0	0	0	0	0	0	0	0	0	0	0	0	0	0	0	0	0	0
23110187|F|0-26:T>C-26:T>C	TGCAGAACATCTCTACGGTTGGCCCTTATCCTGGTACTGAAGCACACTGCCTGCCTGTGAGGGGAGGCA	TGCAGAACATCTCTACGGTTGGCCCTTATCCTGGTACTGAAGCACACTGCCTGCCTGTGAGGGGAGGCA	JRXG01108915.1_scaffold-22561_1	16238	2	1.84E-28	26:T>C	26	0.957219	0.807263	0.511173	0.488827	0.192737	0.318436	0.311179	0.49975	0.405465	7.12877	6.64159	1	2	1	0	2	1	1	1	0	0	2	2	2	2	1	0	1	2	2	-	1	2	2	1	2	2	2	1	0	2
23111164|F|0-29:C>T-29:C>T	TGCAGAACATTTAGCTCTGCTTGTTTGTCCCGCAGCAGCTTGCCCCCCTTGATGCTCCGGTGGAAGCAG	TGCAGAACATTTAGCTCTGCTTGTTTGTCCCGCAGCAGCTTGCCCCCCTTGATGCTCCGGTGGAAGCAG	KN282559.1_scaffold-6715	49843	10	1.84E-28	29:C>T	29	1	1	0.002674	0.997326	0	0.002674	0	0.005333	0.002667	10.13646	6	1	0	0	0	0	0	0	0	0	0	0	0	0	0	0	0	0	0	0	0	0	0	0	0	0	0	0	0	0	0
23111166|F|0-28:C>T-28:C>T	TGCAGAACCACTACCAAAATCAGTCTCCCTCATATCTTCACCAAATGAACTTGGCACACAGATGCTACT	TGCAGAACCACTACCAAAATCAGTCTCCCTCATATCTTCACCAAATGAACTTGGCACACAGATGCTACT	KN288878.1_scaffold-15824	85876	1	1.84E-28	28:C>T	28	0.997326	1	0.016086	0.983914	0	0.016086	0	0.031654	0.015827	8.12607	3.33333	1	0	0	0	0	0	0	0	0	0	0	0	0	0	2	0	0	0	0	0	0	0	0	0	0	0	0	0	0	0
23111167|F|0-18:C>T-18:C>T	TGCAGAACCAGATGATAGCTATTAGGCGGACGAATCACTAGTCGGGTTGAACTCAAGCATGAGCGGTTC	TGCAGAACCAGATGATAGCTATTAGGCGGACGAATCACTAGTCGGGTTGAACTCAAGCATG	KN288053.1_scaffold-14643	244622	1	4.20E-24	18:C>T	18	1	1	0.005348	0.994652	0	0.005348	0	0.010638	0.005319	12.13404	5	1	0	0	0	2	0	0	0	0	0	0	0	0	0	0	0	2	0	0	0	0	0	0	0	0	0	0	0	0	0
23111184|F|0-23:G>A-23:G>A	TGCAGAACGGCCTCTCTGACTCTGTGGAAAGGAGCCAGAATCAAGGCAGAAAAGTCCCACCCGGGTTAG	TGCAGAACGGCCTCTCTGACTCTGTGGAAAGGAGCCAGAATCAAGGCAGAAAAGTCCCACCCGGGTTAG	KN283726.1_scaffold-8410	65266	1	1.84E-28	23:G>A	23	0.991979	1	0.02965	0.97035	0	0.02965	0	0.057541	0.02877	6.27273	3.66667	1	0	0	0	0	0	0	0	0	0	0	0	0	0	0	0	0	0	0	0	0	0	0	0	0	0	0	0	0	0
23111186|F|0-13:G>A-13:G>A	TGCAGAACTAGTCGATGGCTATTTAGGCGGACGAATCGGTAGTCAGGTTGAACTCGAGCATGAGCGGTT	TGCAGAACTAGTCGATGGCTATTTAGGCGGACGAATCGGTAGTCAGGTTGAACTCGAGCATG	KN280108.1_scaffold-3303	15950	1	1.20E-24	13:G>A	13	1	0.997326	0.048128	0.951872	0.002674	0.045455	0.005333	0.091624	0.048479	10.24947	6.3913	1	0	0	0	0	0	0	0	0	0	0	0	0	0	0	0	0	0	0	0	0	0	0	0	0	0	0	0	0	0
23111188|F|0-46:C>T-46:C>T	TGCAGAACTCGGCCTCAGTTGTTGCAAGGAATTTAGCAGTGGTGAGCATTGAGCCCCAAGTTCAAGATT	TGCAGAACTCGGCCTCAGTTGTTGCAAGGAATTTAGCAGTGGTGAGCATTGAGCCCCAAGTTCAAGATT		0	0	999	46:C>T	46	0.989305	1	0.043243	0.956757	0	0.043243	0	0.082747	0.041373	9.20386	5.35294	1	0	0	0	0	0	0	0	0	0	0	0	2	0	0	2	0	0	0	0	0	0	0	0	0	0	0	0	0	0
23111195|F|0-43:C>T-43:C>T	TGCAGAACTGTGATGACCAGCAAAATTTTGACATACAGAAGTTCACTTTCTAGAACAGTGATTCTAAAC	TGCAGAACTGTGATGACCAGCAAAATTTTGACATACAGAAGTTCACTTTCTAGAACAGTGATTCTAAAC	KN287969.1_scaffold-14527	93858	1	8.58E-27	43:C>T	43	0.962567	0.011111	1	0	0.988889	0.011111	0.021975	0	0.010988	3.5	3.6758	1	1	1	1	1	1	1	1	1	1	1	1	1	-	1	1	1	1	2	1	1	1	1	-	1	1	1	1	-	-
23111196|F|0-27:C>T-27:C>T	TGCAGAACTGTGCAGCCAGCTGCGGGGCACAAGTGACAGTGCAGTGGTGGCTGCCGCATGAGCGGTTCA	TGCAGAACTGTGCAGCCAGCTGCGGGGCACAAGTGACAGTGCAGTGGTGGCTGCCGCATG	KN289921.1_scaffold-17362	28345	1	1.47E-23	27:C>T	27	0.933155	0.982808	0.051576	0.948424	0.017192	0.034384	0.033793	0.097832	0.065812	4.31132	3.15	1	0	0	0	0	0	0	0	0	0	0	0	0	0	0	0	0	0	-	0	0	0	0	0	0	0	0	0	0	0
23111204|F|0-42:G>A-42:G>A	TGCAGAAGAACAAAAGCATCCAGTGACAGCAGTTTTCATAGAGTTGGGGAAGGAAAATTAATCATGCTT	TGCAGAAGAACAAAAGCATCCAGTGACAGCAGTTTTCATAGAGTTGGGGAAGGAAAATTAATCATGCTT	KN281493.1_scaffold-5237	167943	1	1.84E-28	42:G>A	42	0.997326	1	0.008043	0.991957	0	0.008043	0	0.015956	0.007978	6.51502	3	1	0	0	0	0	0	0	0	0	0	0	0	0	0	0	0	0	0	0	0	0	0	0	0	0	0	0	0	0	0
23111205|F|0-59:G>C-59:G>C	TGCAGAAGAACCCTAGTCTGAGCAGCTAGGCACCAAATTCTAAGTCCCTGAAGGGGCTTGATCTGCTAT	TGCAGAAGAACCCTAGTCTGAGCAGCTAGGCACCAAATTCTAAGTCCCTGAAGGGGCTTGATCTGCTAT	KN284675.1_scaffold-9777	181701	1	1.84E-28	59:G>C	59	0.994652	1	0.005376	0.994624	0	0.005376	0	0.010695	0.005347	9.26609	4	1	0	0	0	0	0	0	0	0	0	0	0	0	0	0	0	0	0	0	0	0	0	0	0	0	0	0	0	0	0
23111215|F|0-13:C>T-13:C>T	TGCAGAAGAGAGGCAGAAGGCAATAACAGCAGCCTGCCACTGGGGATCAGGCATGAGCGGTTCAGCAGG	TGCAGAAGAGAGGCAGAAGGCAATAACAGCAGCCTGCCACTGGGGATCAGGCATG	KN284156.1_scaffold-9022	204121	1	7.54E-21	13:C>T	13	0.994652	1	0.008065	0.991935	0	0.008065	0	0.015999	0.007999	11.47009	7.75	1	0	0	0	0	0	0	0	0	0	0	0	0	0	0	0	0	0	0	0	0	0	0	0	0	0	0	0	0	0
23111220|F|0-20:C>A-20:C>A	TGCAGAAGAGCTTATAACATCTTTGTAACAAACATATATCAGCATGAGCGGTTCAGCAGGAATGCCGAG	TGCAGAAGAGCTTATAACATCTTTGTAACAAACATATATCAGCATG	KN278143.1_scaffold-499	195865	1	5.50E-16	20:C>A	20	0.962567	1	0.002778	0.997222	0	0.002778	0	0.00554	0.00277	8.43681	3	1	0	0	2	0	0	0	0	0	0	0	0	0	0	0	0	0	0	0	0	0	0	0	0	-	0	0	0	0	0
23111230|F|0-60:G>A-60:G>A	TGCAGAAGCAAAGACAGGAAAGTTCTGTACACTGGAGCTGAGCAAGATTATAAAGCAGATGCAGATATG	TGCAGAAGCAAAGACAGGAAAGTTCTGTACACTGGAGCTGAGCAAGATTATAAAGCAGATGCAGATATG	KN286557.1_scaffold-12486	23541	1	1.84E-28	60:G>A	60	0.986631	1	0.00542	0.99458	0	0.00542	0	0.010781	0.005391	6.56427	3.5	1	0	0	0	0	0	0	0	0	0	0	0	0	0	0	0	0	0	0	0	0	0	0	0	0	0	0	0	0	0
23111232|F|0-20:T>G-20:T>G	TGCAGAAGCAACTACAAGTGTGTCAAGGCCAGCACTCTGCAACCTACTACCTATTCAAACTGCATGAGC	TGCAGAAGCAACTACAAGTGTGTCAAGGCCAGCACTCTGCAACCTACTACCTATTCAAACTGCATGAGC	KN286557.1_scaffold-12486	111361	1	8.58E-27	20:T>G	20	0.991979	1	0.002695	0.997305	0	0.002695	0	0.005376	0.002688	9.31049	3	1	0	0	0	0	0	0	0	0	0	0	0	0	0	0	0	0	0	0	0	0	0	0	0	0	0	0	0	0	0
23111242|F|0-33:T>C-33:T>C	TGCAGAAGCAGTGGGAGTGGTGATTTCTGAGCCTGCTGCTGCCAGCTCTCAGGGGCAGCATGAGCGGTT	TGCAGAAGCAGTGGGAGTGGTGATTTCTGAGCCTGCTGCTGCCAGCTCTCAGGGGCAGCATG	KN288278.1_scaffold-14958	418996	1	1.20E-24	33:T>C	33	1	0.959893	0.205882	0.794118	0.040107	0.165775	0.076997	0.32699	0.201993	7.78	4.68817	1	0	0	0	0	0	2	0	0	0	0	2	0	0	0	0	0	0	0	0	0	0	0	0	0	0	0	0	0	0
23111256|F|0-52:T>C-52:T>C	TGCAGAAGCTAGGGAGAGCTGGAAGCCCTTTAAAGGGCAGCTCTGTGTGACGTACCCTGGCCATGTGCT	TGCAGAAGCTAGGGAGAGCTGGAAGCCCTTTAAAGGGCAGCTCTGTGTGACGTACCCTGGCCATGTGCT	KN279938.1_scaffold-3056	3235	1	1.84E-28	52:T>C	52	0.997326	1	0.002681	0.997319	0	0.002681	0	0.005348	0.002674	7.69658	3	1	0	0	0	0	0	0	0	0	0	0	0	0	2	0	0	0	0	0	0	0	0	0	0	0	0	0	0	0	0
23111260|F|0-15:C>T-15:C>T	TGCAGAAGCTCTCCACACTGGTCATAGGCAGCACCAGCATGAGCGGTTCAGCAGGAATGCCGAGACCGA	TGCAGAAGCTCTCCACACTGGTCATAGGCAGCACCAGCATG	KN289731.1_scaffold-17075	117006	1	2.52E-13	15:C>T	15	0.997326	1	0.509383	0.490617	0	0.509383	0	0.499824	0.249912	12.00213	7.54393	1	2	2	0	2	2	2	2	2	2	0	2	0	0	2	0	2	0	0	2	2	2	0	0	0	0	0	0	0	0
23111263|F|0-58:T>C-58:T>C	TGCAGAAGCTGCTCTCCAGGCTGCCTGGTGGCCACGTACATGGCATCCCCTGCCTCAGTGCCCTCCTCC	TGCAGAAGCTGCTCTCCAGGCTGCCTGGTGGCCACGTACATGGCATCCCCTGCCTCAGTGCCCTCCTCC	KN286169.1_scaffold-11916	25502	3	1.84E-28	58:T>C	58	1	1	0.02139	0.97861	0	0.02139	0	0.041866	0.020933	8.43497	3.75	1	0	0	0	0	0	0	0	0	0	0	0	0	0	0	0	0	0	0	0	0	0	0	0	0	0	0	0	0	0
23111266|F|0-61:A>G-61:A>G	TGCAGAAGGAAGTGGCTGCTGTGATGAAGCAGAGTGCAGAGTCTGGCTTCCCCTCCCCCACAGGTGGCA	TGCAGAAGGAAGTGGCTGCTGTGATGAAGCAGAGTGCAGAGTCTGGCTTCCCCTCCCCCACAGGTGGCA	KN282104.1_scaffold-6089	213738	1	1.84E-28	61:A>G	61	1	0.991979	0.109626	0.890374	0.008021	0.101604	0.015914	0.195216	0.105565	9.87152	5.09259	1	0	0	0	0	0	0	0	0	0	0	0	0	0	0	0	0	0	0	0	0	0	0	0	0	0	0	0	0	0
23111270|F|0-39:G>C-39:G>C	TGCAGAAGGCAGCATTCATCCCACAGCCCAGTGAGACCAGGGCAGTGCACAGCCCATCCCCTCTCTGAG	TGCAGAAGGCAGCATTCATCCCACAGCCCAGTGAGACCAGGGCAGTGCACAGCCCATCCCCTCTCTGAG	KN292199.1_scaffold-20704	21707	1	1.84E-28	39:G>C	39	1	0.997326	0.005348	0.994652	0.002674	0.002674	0.005333	0.010638	0.007986	9.90578	9.5	1	0	0	0	0	0	0	0	2	0	0	0	0	0	0	0	0	0	0	0	0	0	0	0	0	0	0	0	0	0
23111275|F|0-9:C>T-9:C>T	TGCAGAAGGCTTTTCCCAGCCGTTGAAGGAGAAGAGAACTTCCTGGAAGGCTGTGAACACTGCTGCCCA	TGCAGAAGGCTTTTCCCAGCCGTTGAAGGAGAAGAGAACTTCCTGGAAGGCTGTGAACACTGCTGCCCA	KN281807.1_scaffold-5681	310	1	1.84E-28	9:C>T	9	0.949198	1	0.002817	0.997183	0	0.002817	0	0.005618	0.002809	3.29885	3	1	0	0	-	0	0	0	0	0	0	0	0	0	0	0	0	0	0	0	0	0	0	0	0	0	0	0	0	0	0
23111284|F|0-9:G>A-9:G>A	TGCAGAAGGGGTCAGCAACATTTTTGGGCAGGGTGCCAAAAACACCCACAACGCCAGCTTGTGAGATGT	TGCAGAAGGGGTCAGCAACATTTTTGGGCAGGGTGCCAAAAACACCCACAACGCCAGCTTGTGAGATGT	KN293406.1_scaffold-22516	47999	7	1.84E-28	9:G>A	9	0.997326	1	0.024129	0.975871	0	0.024129	0	0.047093	0.023546	8.99571	4.66667	1	0	0	0	0	0	0	0	0	0	0	0	0	0	0	0	0	0	0	0	0	0	0	0	0	0	0	0	0	2
23111287|F|0-29:G>A-29:G>A	TGCAGAAGGTTGGCAAGGGAAGCCACAGAGAGGCCCCAGCATGAGCGGTTCAGCAGGAATGCCGAGACC	TGCAGAAGGTTGGCAAGGGAAGCCACAGAGAGGCCCCAGCATG	KN285144.1_scaffold-10427	67325	1	2.19E-14	29:G>A	29	0.997326	1	0.005362	0.994638	0	0.005362	0	0.010666	0.005333	11.34402	11	1	0	0	0	0	0	0	0	0	0	0	0	0	0	0	0	0	0	0	0	0	0	0	0	0	0	0	0	0	0
23111292|F|0-26:C>T-26:C>T	TGCAGAAGTATTGTTTTTGCCACTTACGGTTTGCCATTCTACTATCTCTGCTTTATGAACATGTAAATG	TGCAGAAGTATTGTTTTTGCCACTTACGGTTTGCCATTCTACTATCTCTGCTTTATGAACATGTAAATG	KN279066.1_scaffold-1808	18709	1	1.84E-28	26:C>T	26	0.994652	1	0.043011	0.956989	0	0.043011	0	0.082322	0.041161	9.58065	4.42857	1	0	0	0	0	0	0	0	0	0	0	0	0	0	0	0	0	0	0	0	0	0	0	0	0	0	0	0	0	0
23111293|F|0-37:A>G-37:A>G	TGCAGAAGTCTCTTTGGGCTTGAGCCTGTGAAGGCCTAAGGACCAGAAAAGCATTAAAGTGCATGAGCG	TGCAGAAGTCTCTTTGGGCTTGAGCCTGTGAAGGCCTAAGGACCAGAAAAGCATTAAAGTGCATG	KN280997.1_scaffold-4508	74161	1	2.80E-26	37:A>G	37	0.991979	1	0.008086	0.991914	0	0.008086	0	0.016042	0.008021	9.37687	7.33333	1	0	0	0	0	0	0	0	0	0	0	0	0	0	0	0	0	0	0	0	0	0	0	0	0	0	0	0	0	0
23111295|F|0-20:A>C-20:A>C	TGCAGAAGTCTTCTCCAACCAACCTATGTTAATAGGTTTTAAACTCTAGGCTCTAAATTGCATGAGCGG	TGCAGAAGTCTTCTCCAACCAACCTATGTTAATAGGTTTTAAACTCTAGGCTCTAAATTGCATG	KN278888.1_scaffold-1554	279839	1	9.81E-26	20:A>C	20	0.994652	1	0.002688	0.997312	0	0.002688	0	0.005362	0.002681	6.50216	3	1	0	0	0	0	0	0	0	0	0	0	0	0	0	0	0	0	0	0	0	0	0	0	0	0	0	0	0	0	0
23111307|F|0-43:G>C-43:G>C	TGCAGAAGTGTGTGTGTGGGAGGGGAGCAATATTCCTGGAAAAGTTATGACCTGTGCTTGCAGCATGAG	TGCAGAAGTGTGTGTGTGGGAGGGGAGCAATATTCCTGGAAAAGTTATGACCTGTGCTTGCAGCATGAG	KN277894.1_scaffold-157	27372	1	2.38E-27	43:G>C	43	0.986631	0.99458	0.01897	0.98103	0.00542	0.01355	0.010781	0.037221	0.024001	8.02169	3.85714	1	0	0	0	0	0	0	0	0	0	0	2	0	0	0	0	0	0	0	0	0	0	0	0	0	0	0	0	0	0
23111316|F|0-22:C>A-22:C>A	TGCAGAATACGAACTCTTCCCCCCAGCCTTTTTCACCTAATCTAACTTGTTTGCATGAGCGGTTCAGCA	TGCAGAATACGAACTCTTCCCCCCAGCCTTTTTCACCTAATCTAACTTGTTTGCATG	KN284728.1_scaffold-9850	25762	1	6.23E-22	22:C>A	22	0.949198	1	0.002817	0.997183	0	0.002817	0	0.005618	0.002809	9.30562	3	1	0	0	0	0	0	0	0	0	0	0	0	0	0	0	0	0	0	0	0	0	0	0	0	0	0	0	0	0	0
23111319|F|0-13:T>G-13:T>G	TGCAGAATAGCACTGACTGGTCCACTCCCCCTCAGGAGGGGACAGAGGGAGGAGCAGAGCCACAGTTCA	TGCAGAATAGCACTGACTGGTCCACTCCCCCTCAGGAGGGGACAGAGGGAGGAGCAGAGCCACAGTTCA	KN282635.1_scaffold-6835	59913	1	1.84E-28	13:T>G	13	0.991979	0.997305	0.051213	0.948787	0.002695	0.048518	0.005376	0.09718	0.051278	5.83871	3.6087	1	0	0	0	0	0	0	0	0	0	0	2	0	0	0	0	0	0	0	0	2	0	2	0	0	0	0	0	0	0
23111328|F|0-41:G>A-41:G>A	TGCAGAATCAGTGTATTTTCACCCATAGCAGAAAGAGACAGGATTCTGCTGTGCATGAGCGGTTCAGCA	TGCAGAATCAGTGTATTTTCACCCATAGCAGAAAGAGACAGGATTCTGCTGTGCATG	KN287091.1_scaffold-13255	227645	1	6.23E-22	41:G>A	41	0.997326	0.978552	0.176944	0.823056	0.021448	0.155496	0.041975	0.291269	0.166622	11.43764	7.36585	1	0	0	0	0	0	0	0	0	0	0	0	0	0	0	0	0	0	0	2	0	0	2	2	2	0	0	0	0	0
23111339|F|0-68:G>A-68:G>A	TGCAGAATGAGCACATGTGGTGCCTGTGTAAATCTTTATAGACAAAAAATGCATGAGCGGTTCAGCAGG	TGCAGAATGAGCACATGTGGTGCCTGTGTAAATCTTTATAGACAAAAAATGCATG	KN283023.1_scaffold-7420	45597	1	7.54E-21	68:G>A	68	0.965241	1	0.00277	0.99723	0	0.00277	0	0.005525	0.002762	8.68514	3	1	0	0	0	0	0	0	0	0	0	0	0	0	0	0	0	0	0	0	0	0	0	0	0	0	0	0	0	0	0
23111349|F|0-57:T>C-57:T>C	TGCAGAATTAAGCTGCGTTACCCGCTGGCAGCAGCAACAAGCTAGATAGAGTCGCTCTCTGCCATCAGC	TGCAGAATTAAGCTGCGTTACCCGCTGGCAGCAGCAACAAGCTAGATAGAGTCGCTCTCTGCCATCAGC	KN291864.1_scaffold-20206	1805	1	1.84E-28	57:T>C	57	0.991979	0.997305	0.056604	0.943396	0.002695	0.053908	0.005376	0.1068	0.056088	5.17826	3.4	1	0	0	0	0	0	0	0	0	0	0	0	0	2	0	0	0	0	0	0	0	0	0	0	0	0	0	0	0	0
23111351|F|0-66:C>T-66:C>T	TGCAGAATTATTCCTGCTCAGGTTCAGCCAGGCTGCACATGAGCTAGGCTCAGCCCAGGACAGCAGCTG	TGCAGAATTATTCCTGCTCAGGTTCAGCCAGGCTGCACATGAGCTAGGCTCAGCCCAGGACAGCAGCTG	KN288247.1_scaffold-14918	82750	1	1.84E-28	66:C>T	66	1	1	0.029412	0.970588	0	0.029412	0	0.057093	0.028547	8.46055	5	1	0	0	0	0	0	0	0	0	0	0	0	0	0	0	0	0	0	0	0	0	0	0	0	0	0	0	0	0	0
23111354|F|0-22:G>A-22:G>A	TGCAGAATTCCCCACTGTGCCCGAGGACTCTCCAAACAGCAGAGACAGATGCATGAGCGGTTCAGCAGG	TGCAGAATTCCCCACTGTGCCCGAGGACTCTCCAAACAGCAGAGACAGATGCATG	KN288539.1_scaffold-15337	98332	1	7.54E-21	22:G>A	22	0.983957	1	0.019022	0.980978	0	0.019022	0	0.03732	0.01866	10.13883	7.85714	1	0	0	0	0	2	0	0	0	0	0	0	0	0	0	0	0	0	0	0	0	0	0	0	0	0	0	2	0	0
23111358|F|0-32:C>T-32:C>T	TGCAGAATTGCACCTCTGTCTCAACCCAATGACCAACAAGCTACTGCTGTCTGCATGAGCGGTTCAGCA	TGCAGAATTGCACCTCTGTCTCAACCCAATGACCAACAAGCTACTGCTGTCTGCATG	KN288565.1_scaffold-15368	34159	1	6.23E-22	32:C>T	32	0.997326	0.970509	0.152815	0.847185	0.029491	0.123324	0.057242	0.258925	0.158084	7.88326	3.84211	1	0	0	0	0	0	0	0	0	0	0	0	0	0	0	0	0	1	1	0	0	0	0	0	0	0	0	0	0	0
23111359|F|0-16:G>C-16:G>C	TGCAGAATTGCTGCTGGGTCTGGCTTTGTGGGCCGGATCCAGCCTGCATGAGCGGTTCAGCAGGAATGC	TGCAGAATTGCTGCTGGGTCTGGCTTTGTGGGCCGGATCCAGCCTGCATG	KN291672.1_scaffold-19932	225518	1	3.91E-18	16:G>C	16	0.986631	0.99458	0.059621	0.940379	0.00542	0.054201	0.010781	0.112132	0.061457	7.95248	5.74074	1	0	0	0	0	0	0	0	0	0	0	0	0	0	0	0	0	0	0	0	0	0	0	0	0	0	0	0	0	0
23111361|F|0-7:T>G-7:T>G	TGCAGAATTTATCTGCAAAGGTACATTTTGATGCATGAGCGGTTCAGCAGGAATGCCGAGACCGATCTC	TGCAGAATTTATCTGCAAAGGTACATTTTGATGCATG	KN280633.1_scaffold-4019	8653	1	3.16E-11	7:T>G	7	0.983957	1	0.002717	0.997283	0	0.002717	0	0.00542	0.00271	11.19172	3	1	0	0	0	0	0	0	0	0	0	0	0	0	0	0	0	0	0	0	0	0	0	0	0	0	0	0	0	0	0
23111370|F|0-14:G>T-14:G>T	TGCAGACAAGGACAGGGATGTTACAGTACACCATAAATAGCCAATGGTGTGCTCTTTTTTGCCAAAGAA	TGCAGACAAGGACAGGGATGTTACAGTACACCATAAATAGCCAATGGTGTGCTCTTTTTTGCCAAAGAA	KN293313.1_scaffold-22381	301597	1	1.84E-28	14:G>T	14	0.991979	1	0.005391	0.994609	0	0.005391	0	0.010724	0.005362	6.19481	2.5	1	0	0	0	0	0	0	0	0	0	0	0	0	0	0	0	0	0	0	0	0	0	0	0	0	0	0	0	0	0
23111373|F|0-43:C>T-43:C>T	TGCAGACAATATAAAGAAACAGGGAAGGGATTGAAAAGCTCCACATCATCAACAGATGCATGAGCGGTT	TGCAGACAATATAAAGAAACAGGGAAGGGATTGAAAAGCTCCACATCATCAACAGATGCATG	KN293095.1_scaffold-22043	85127	6	1.20E-24	43:C>T	43	1	0.973262	0.179144	0.820856	0.026738	0.152406	0.052046	0.294103	0.173075	11.00439	7.27907	1	0	0	0	2	0	0	0	0	0	0	0	0	0	0	0	0	2	1	0	0	0	0	0	2	0	0	0	2	0
23111378|F|0-44:C>G-44:C>G	TGCAGACACAGACAGAGAGTGTGGCTCCAGCCCAAAATGTTGTTCTGCTAGCTGCATGAGCGGTTCAGC	TGCAGACACAGACAGAGAGTGTGGCTCCAGCCCAAAATGTTGTTCTGCTAGCTGCATG	KN285857.1_scaffold-11454	6387	1	1.79E-22	44:C>G	44	1	1	0.005348	0.994652	0	0.005348	0	0.010638	0.005319	8.24894	5	1	0	0	0	0	0	0	0	0	0	0	0	0	0	0	0	0	0	0	0	0	0	0	0	0	0	0	0	0	0
23111384|F|0-56:T>G-56:T>G	TGCAGACACCAAGACCAAATGATGAGTTTTGAACAACACTGTATAACAGGATCTGCTTTAAAAAGAATT	TGCAGACACCAAGACCAAATGATGAGTTTTGAACAACACTGTATAACAGGATCTGCTTTAAAAAGAATT	KN290153.1_scaffold-17699	597486	1	1.84E-28	56:T>G	56	0.994652	0.94086	0.419355	0.580645	0.05914	0.360215	0.111285	0.486993	0.299139	9.06849	6.06667	1	0	0	0	0	2	0	0	0	0	0	0	0	2	0	0	0	0	0	1	0	0	2	0	0	0	0	2	0	0
23111386|F|0-6:C>T-6:C>T	TGCAGACACCAGTCCCTTACCCTTGCTCCTCCTCAGCCTGGCACCAGTGGGAGCATGAGCGGTTCAGCA	TGCAGACACCAGTCCCTTACCCTTGCTCCTCCTCAGCCTGGCACCAGTGGGAGCATG	KN279707.1_scaffold-2734	118506	10	6.23E-22	6:C>T	6	0.983957	1	0.002717	0.997283	0	0.002717	0	0.00542	0.00271	9.08913	3	1	0	0	0	0	0	0	0	0	0	0	0	0	0	0	0	0	0	0	0	0	0	0	0	0	0	0	0	0	0
23111390|F|0-64:G>A-64:G>A	TGCAGACACCTGCACCTTTAAAACACGACAGGCCAGTCCTCTGATCTGAGCTGTCTCCTGATCCGTCTG	TGCAGACACCTGCACCTTTAAAACACGACAGGCCAGTCCTCTGATCTGAGCTGTCTCCTGATCCGTCTG	KN292400.1_scaffold-21014	142189	1	1.84E-28	64:G>A	64	1	0.994652	0.032086	0.967914	0.005348	0.026738	0.010638	0.062112	0.036375	9.14409	4.76923	1	0	0	0	0	0	0	0	0	0	0	0	0	0	0	0	0	0	0	0	0	0	0	0	0	0	2	0	0	0
23111407|F|0-23:T>G-23:T>G	TGCAGACAGACCAGGGGAAAACATAGGAAGCTTCTAGAAATAGAGGCTCTAGCATAATCTGTTTTTCTG	TGCAGACAGACCAGGGGAAAACATAGGAAGCTTCTAGAAATAGAGGCTCTAGCATAATCTGTTTTTCTG	KN279014.1_scaffold-1732	73502	1	1.84E-28	23:T>G	23	0.970588	1	0.002755	0.997245	0	0.002755	0	0.005494	0.002747	5.92274	3	1	0	0	0	0	0	0	0	0	0	0	0	0	0	0	0	0	0	0	0	0	0	0	0	0	0	0	0	0	0
23111413|F|0-28:A>C-28:A>C	TGCAGACAGATCCAGGGGGCATATGTCCACCATGCCTCCCCTAAGAGCATGAGCGGTTCAGCAGGAATG	TGCAGACAGATCCAGGGGGCATATGTCCACCATGCCTCCCCTAAGAGCATG	KN279581.1_scaffold-2547	52534	1	1.09E-18	28:A>C	28	1	0.927807	0.382353	0.617647	0.072193	0.31016	0.133962	0.472318	0.30314	11.91096	8.45665	1	2	0	2	0	0	0	2	0	0	0	0	2	2	0	0	0	0	0	2	2	0	0	0	0	0	0	0	1	1
23111417|F|0-49:C>A-49:C>A	TGCAGACAGCAGCATATATACAACTCAATGTGGCAACTAGGTCTGTAATCCAATGCTCTGCTGCATGAG	TGCAGACAGCAGCATATATACAACTCAATGTGGCAACTAGGTCTGTAATCCAATGCTCTGCTGCATGAG	KN280888.1_scaffold-4365	797665	1	2.38E-27	49:C>A	49	0.986631	1	0.00271	0.99729	0	0.00271	0	0.005405	0.002703	7.72845	5	1	0	0	0	0	0	0	0	0	0	0	0	0	0	0	0	0	0	0	0	0	0	0	0	0	0	0	0	0	0
23111418|F|0-22:C>T-22:C>T	TGCAGACAGCAGCTCCCCGCCCCGGCCATGCAAATACATTAGAGTATTAAATCAGAGCCAGGTGTGTGC	TGCAGACAGCAGCTCCCCGCCCCGGCCATGCAAATACATTAGAGTATTAAATCAGAGCCAGGTGTGTGC	KN293703.1_scaffold-22962	189742	1	1.84E-28	22:C>T	22	0.981283	0.882834	0.294278	0.705722	0.117166	0.177112	0.206877	0.415357	0.311117	4.82555	4.74046	1	0	0	0	0	0	0	0	-	0	0	0	0	0	0	0	0	0	0	0	0	0	0	0	-	0	0	0	0	0
23111424|F|0-38:C>G-38:C>G	TGCAGACAGCTTCTGGGCCTGGCAACACCCAGGGCCTGCCTGGACCCTGCTGCTGGTACCCAGCACAGC	TGCAGACAGCTTCTGGGCCTGGCAACACCCAGGGCCTGCCTGGACCCTGCTGCTGGTACCCAGCACAGC	KN282773.1_scaffold-7051	115911	1	1.84E-28	38:C>G	38	1	1	0.02139	0.97861	0	0.02139	0	0.041866	0.020933	8.39362	3.22222	1	0	2	0	0	0	0	0	2	0	0	0	0	0	0	0	0	0	0	0	0	0	0	0	0	0	0	0	0	0
23111432|F|0-53:C>A-53:C>A	TGCAGACAGGGGGCAGAGGGGAGGGGCCATCCCAGCTCTCTGGAGCAGAGAGTCCCACCCAGCCCAGAA	TGCAGACAGGGGGCAGAGGGGAGGGGCCATCCCAGCTCTCTGGAGCAGAGAGTCCCACCCAGCCCAGAA	KN279032.1_scaffold-1756	18170	9	1.84E-28	53:C>A	53	0.991979	0.997305	0.070081	0.929919	0.002695	0.067385	0.005376	0.130339	0.067858	9.97408	5.66667	1	0	0	0	0	0	0	0	0	0	0	0	0	0	0	0	0	0	0	0	0	0	0	0	0	0	0	0	0	0
23111436|F|0-21:G>C-21:G>C	TGCAGACAGTACCAGAGCTGGGAAGTGGGGCAGGGCTGCATCAGCCCAGCCCTGATCCTGGGACAGGCA	TGCAGACAGTACCAGAGCTGGGAAGTGGGGCAGGGCTGCATCAGCCCAGCCCTGATCCTGGGACAGGCA	KN277787.1_scaffold-11	53877	1	1.84E-28	21:G>C	21	1	1	0.002674	0.997326	0	0.002674	0	0.005333	0.002667	8.7234	3	1	0	0	0	0	0	0	0	0	0	2	0	0	0	0	0	0	0	0	0	0	0	0	0	0	0	0	0	0	0
23111442|F|0-31:T>C-31:T>C	TGCAGACAGTATAATGAAGCAGGGAGGCCAATTGAAAAGCATTAACAGATGCATGAGCGGTTCAGCAGG	TGCAGACAGTATAATGAAGCAGGGAGGCCAATTGAAAAGCATTAACAGATGCATG	KN293585.1_scaffold-22797	430935	1	7.54E-21	31:T>C	31	0.994652	0.997312	0.02957	0.97043	0.002688	0.026882	0.005362	0.057391	0.031376	9.91398	6.5	1	0	0	0	0	0	0	0	0	0	0	0	0	0	0	0	0	0	0	0	0	0	0	0	0	0	0	0	0	0
23111448|F|0-40:C>G-40:C>G	TGCAGACAGTGAGCAGGAGCAGCCACGCCTTGGACAACCCCATGCGGTAGCTGGACGGGAACAAGCTAA	TGCAGACAGTGAGCAGGAGCAGCCACGCCTTGGACAACCCCATGCGGTAGCTGGACGGGAACAAGCTAA	KN284664.1_scaffold-9763	900335	1	1.84E-28	40:C>G	40	0.991979	1	0.008086	0.991914	0	0.008086	0	0.016042	0.008021	7.57725	4.33333	1	0	0	0	0	0	0	0	0	0	0	0	0	0	0	0	0	0	0	0	0	0	0	0	0	0	2	0	0	0
23111455|F|0-45:T>G-45:T>G	TGCAGACATAATTTAGTTTGGCTCACCAGGAATTAAAGCATTGTATCCATGGATTTGTTGCATGAGCGG	TGCAGACATAATTTAGTTTGGCTCACCAGGAATTAAAGCATTGTATCCATGGATTTGTTGCATG	KN290054.1_scaffold-17555	130426	6	9.81E-26	45:T>G	45	1	0.989305	0.179144	0.820856	0.010695	0.168449	0.021162	0.294103	0.157632	8.87957	4.82022	1	0	0	0	0	0	0	0	0	0	0	0	0	0	0	0	0	0	0	0	0	0	0	0	0	2	0	0	2	0
23111460|F|0-43:T>G-43:T>G	TGCAGACATAGGTTACAAAAGAGGCTACATTTTGAAACTTCTTTATCTCATACTGCATGAGCGGTTCAG	TGCAGACATAGGTTACAAAAGAGGCTACATTTTGAAACTTCTTTATCTCATACTGCATG	KN278710.1_scaffold-1307	23663	1	5.12E-23	43:T>G	43	0.997326	0.997319	0.029491	0.970509	0.002681	0.02681	0.005348	0.057242	0.031295	7.63675	5.86667	1	0	0	0	0	0	0	0	0	0	0	0	0	0	0	0	0	0	0	0	0	0	0	0	0	0	0	0	0	0
23111464|F|0-32:A>G-32:A>G	TGCAGACATCATCAATGGGGAGGTGGGAAGGTAAAGAGTGGTGACCACCCACAGGCACTGCTGGCAGCA	TGCAGACATCATCAATGGGGAGGTGGGAAGGTAAAGAGTGGTGACCACCCACAGGCACTGCTGGCAGCA	KN277906.1_scaffold-171	235774	1	1.84E-28	32:A>G	32	0.997326	0.959786	0.276139	0.723861	0.040214	0.235925	0.077195	0.399773	0.238484	6.95344	4.07874	1	1	0	0	0	2	0	0	0	2	2	2	1	0	0	2	2	0	0	0	2	0	0	2	0	0	1	0	0	0
23111472|F|0-48:C>T-48:C>T	TGCAGACATGCTGGCCCCGCGGCAGCTGCCACCAAGAGAAGGGCCACCCGCATGAGCGGTTCAGCAGGA	TGCAGACATGCTGGCCCCGCGGCAGCTGCCACCAAGAGAAGGGCCACCCGCATG	KN280511.1_scaffold-3860	9130	1	2.62E-20	48:C>T	48	0.831551	0.987138	0.07717	0.92283	0.012862	0.064309	0.025393	0.14243	0.083911	4.68611	5	1	0	0	0	0	-	-	0	0	-	0	0	0	2	0	0	0	0	0	0	0	0	0	0	0	0	-	0	0	0
23111474|F|0-66:A>G-66:A>G	TGCAGACATGGCAAATAGTATAAGGCCTCTACATTGCAGCTGGGCAAGTAGGTGAGCAACACTCAGACC	TGCAGACATGGCAAATAGTATAAGGCCTCTACATTGCAGCTGGGCAAGTAGGTGAGCAACACTCAGACC	KN288796.1_scaffold-15698	456047	1	1.84E-28	66:A>G	66	0.989305	1	0.037838	0.962162	0	0.037838	0	0.072812	0.036406	6.66667	4.9375	1	0	0	0	0	0	0	0	0	0	0	0	0	0	0	0	0	0	0	0	0	2	0	0	0	0	0	0	0	0
23111476|F|0-61:G>A-61:G>A	TGCAGACATGTCTGTTGCATCACATACAGCATGGGCTTCCTTTTACCCCAGCGCACACAGGGACAGCAT	TGCAGACATGTCTGTTGCATCACATACAGCATGGGCTTCCTTTTACCCCAGCGCACACAGGGACAGCAT	KN291082.1_scaffold-19079	34699	1	1.84E-28	61:G>A	61	0.970588	0.986226	0.093664	0.906336	0.013774	0.07989	0.027169	0.169782	0.098475	9.85841	7.175	1	0	0	0	0	0	2	0	0	0	0	2	2	0	0	2	2	0	0	0	0	0	0	0	0	2	0	0	0	0
23111492|F|0-50:C>A-50:C>A	TGCAGACCACAGGTTGAAAACCACTGGCCTAGAGTTATTAAGGACACCCCCCTTTTGGCCTTAAGAACC	TGCAGACCACAGGTTGAAAACCACTGGCCTAGAGTTATTAAGGACACCCCCCTTTTGGCCTTAAGAACC	KN292456.1_scaffold-21093	494447	1	1.84E-28	50:C>A	50	0.997326	1	0.002681	0.997319	0	0.002681	0	0.005348	0.002674	8.08529	3	1	0	0	0	0	0	0	0	0	0	0	0	0	0	0	0	0	0	0	0	0	0	0	0	0	0	0	0	0	0
23111497|F|0-54:C>G-54:C>G	TGCAGACCAGCTGACAAGCAGGGAGGGAGATTGAAAAGTTCTGTATCATCAACACATGCATGAGCGGTT	TGCAGACCAGCTGACAAGCAGGGAGGGAGATTGAAAAGTTCTGTATCATCAACACATGCATG	KN291552.1_scaffold-19758	34618	9	5.59E-23	54:C>G	54	1	0.639037	0.780749	0.219251	0.360963	0.419786	0.461337	0.34236	0.401849	8.79734	8.5	1	2	2	1	2	1	0	2	1	2	2	1	0	2	0	0	0	1	1	0	0	2	0	0	1	2	2	2	2	2
23111506|F|0-28:A>C-28:A>C	TGCAGACCCACATTAATGCACATGATCAAGTGCGCATGTGGACATCCACCTAAATCTCCTTAATGTGTA	TGCAGACCCACATTAATGCACATGATCAAGTGCGCATGTGGACATCCACCTAAATCTCCTTAATGTGTA	KN286536.1_scaffold-12456	129322	1	1.84E-28	28:A>C	28	0.989305	0.997297	0.145946	0.854054	0.002703	0.143243	0.005391	0.249291	0.127341	8.4406	4.74627	1	0	0	0	0	0	0	2	0	0	0	0	0	0	0	0	0	0	0	0	0	0	0	0	0	0	0	0	0	0
23111525|F|0-24:T>G-24:T>G	TGCAGACCCTTCCCCCATGCCCAGTGCTAGGCTTCCAAAAGAGCCCCAGAGCAGGTCAACATGGCATGA	TGCAGACCCTTCCCCCATGCCCAGTGCTAGGCTTCCAAAAGAGCCCCAGAGCAGGTCAACATGGCATGA	KN283328.1_scaffold-7848	92684	1	6.63E-28	24:T>G	24	1	0.989305	0.139037	0.860963	0.010695	0.128342	0.021162	0.239412	0.130287	8.30753	5.12308	1	1	0	0	0	0	0	0	0	0	0	0	0	0	0	0	0	0	0	2	0	2	0	2	2	0	2	0	0	0
23111526|F|0-21:G>C-21:G>C	TGCAGACCGGATGAGTGGGCAGGGCTGAACCCTTGGCTGGATTCTACGGAGTTGTCACATGGGGTTGGT	TGCAGACCGGATGAGTGGGCAGGGCTGAACCCTTGGCTGGATTCTACGGAGTTGTCACATGGGGTTGGT	KN284057.1_scaffold-8884	21284	1	1.84E-28	21:G>C	21	0.994652	1	0.002688	0.997312	0	0.002688	0	0.005362	0.002681	7.6424	3	1	0	0	0	0	0	0	0	0	0	0	0	0	0	0	0	0	0	0	0	0	0	0	0	0	0	0	0	0	0
23111532|F|0-32:C>A-32:C>A	TGCAGACCTAAAGATGTCATACTGAAAAAAAACCCCCAAAACATCCTGTTCCTGGGGAAGAAATTGAAA	TGCAGACCTAAAGATGTCATACTGAAAAAAAACCCCCAAAACATCCTGTTCCTGGGGAAGAAATTGAAA	KN290698.1_scaffold-18498	2854	1	8.58E-27	32:C>A	32	0.967914	0.035912	0.991713	0.008287	0.964088	0.027624	0.069244	0.016437	0.042841	3.94118	3.94077	1	1	1	1	1	1	1	-	-	1	1	1	1	1	1	1	1	1	1	1	1	1	1	1	1	1	1	1	1	1
23111533|F|0-22:T>C-22:T>C	TGCAGACCTAGAGAGGAATTGTTTGAATCTAAAAAGCAAAAGGAATTGCATGAGCGGTTCAGCAGGAAT	TGCAGACCTAGAGAGGAATTGTTTGAATCTAAAAAGCAAAAGGAATTGCATG	KN283782.1_scaffold-8492	53370	1	3.14E-19	22:T>C	22	0.970588	1	0.00551	0.99449	0	0.00551	0	0.010959	0.005479	7.77384	5.33333	1	0	0	0	0	0	0	0	0	0	0	0	0	0	0	0	0	0	0	0	0	0	0	0	0	0	0	0	0	0
23111534|F|0-50:A>C-50:A>C	TGCAGACCTATCATGTGGCCCCCCGATATTGCCCATGGGTCTTGGTTTGAATGCTCAGACTACATGCTC	TGCAGACCTATCATGTGGCCCCCCGATATTGCCCATGGGTCTTGGTTTGAATGCTCAGACTACATGCTC	KN288444.1_scaffold-15199	40453	1	1.84E-28	50:A>C	50	0.997326	0.997319	0.02681	0.97319	0.002681	0.024129	0.005348	0.052182	0.028765	7.10707	3.41667	1	0	0	0	0	0	0	0	0	0	0	0	0	0	0	0	0	0	0	0	0	0	0	0	0	0	0	0	0	0
23111549|F|0-45:G>A-45:G>A	TGCAGACCTGGAAGTAGACCAGAAGTGATTCTGATTTGCTTCTGGGTCCACCAGTAAGCATGAGCGGTT	TGCAGACCTGGAAGTAGACCAGAAGTGATTCTGATTTGCTTCTGGGTCCACCAGTAAGCATG	KN280145.1_scaffold-3356	103116	1	5.59E-23	45:G>A	45	1	0.893048	0.505348	0.494652	0.106952	0.398396	0.191026	0.499943	0.345485	10.48456	8.27311	1	0	0	2	0	2	2	0	0	2	0	2	2	0	0	2	2	0	0	0	0	0	2	0	0	0	2	1	2	2
23111552|F|0-6:C>T-6:C>T	TGCAGACCTGTCTGTGGGGCTGCAAACCACACGTGCCATGTATGCATGAGCGGTTCAGCAGGAATGCCG	TGCAGACCTGTCTGTGGGGCTGCAAACCACACGTGCCATGTATGCATG	KN278939.1_scaffold-1618	3986	1	4.65E-17	6:C>T	6	0.997326	0.922252	0.257373	0.742627	0.077748	0.179625	0.143406	0.382264	0.262835	11.72248	9.27731	1	0	0	0	0	0	0	0	0	0	0	0	0	2	2	0	0	2	0	0	0	0	2	0	0	0	0	0	0	0
23111561|F|0-20:G>T-20:G>T	TGCAGACGCTGGCTGTGGTGGCAGAGTCCTCTAAAACCCAGGCATGAGCGGTTCAGCAGGAATGCCGAG	TGCAGACGCTGGCTGTGGTGGCAGAGTCCTCTAAAACCCAGGCATG	KN287082.1_scaffold-13245	462553	1	5.50E-16	20:G>T	20	0.997326	0.994638	0.077748	0.922252	0.005362	0.072386	0.010666	0.143406	0.077036	11	5	1	0	0	0	0	0	2	0	0	0	0	0	0	2	0	0	0	0	0	0	0	0	0	0	0	0	0	0	0	0
23110201|F|0-36:A>T-36:A>T	TGCAGACGGCATTCTCCGAGCGCATTGCCTGTGCAGACACGTGCCTTCAAGACGTGCATGAGCGGTTCA	TGCAGACGGCATTCTCCGAGCGCATTGCCTGTGCAGACACGTGCCTTCAAGACGTGCATG	KN293570.1_scaffold-22766	376510	1	1.47E-23	36:A>T	36	0.713904	0.985019	0.018727	0.981273	0.014981	0.003745	0.029514	0.036752	0.033133	7.65749	5.57143	1	0	0	-	0	-	0	0	0	-	0	0	0	0	1	-	0	0	0	0	0	0	0	-	-	0	0	0	0	0
23111566|F|0-6:C>T-6:C>T	TGCAGACGGGTCTGTAGCGCCGTATATCGCACGTGCATGAGCGGTTCAGCAGGAATGCCGAGACCGATC	TGCAGACGGGTCTGTAGCGCCGTATATCGCACGTGCATG	KN292722.1_scaffold-21466	37234	1	2.85E-12	6:C>T	6	0.989305	0.997297	0.018919	0.981081	0.002703	0.016216	0.005391	0.037122	0.021256	9.63124	7.5	1	0	0	0	0	0	0	0	0	0	0	0	0	0	0	0	0	0	0	0	0	0	0	0	0	0	0	0	1	0
23111573|F|0-32:G>A-32:G>A	TGCAGACGTGCAGAAGGCTGTTCTGATGTGCCGTAATTGCAGCATCTGAGCAGACTCAATTAAATCAAG	TGCAGACGTGCAGAAGGCTGTTCTGATGTGCCGTAATTGCAGCATCTGAGCAGACTCAATTAAATCAAG	KN284846.1_scaffold-10023	60513	1	1.84E-28	32:G>A	32	0.997326	0.919571	0.265416	0.734584	0.080429	0.184987	0.14792	0.38994	0.26893	7.04839	4.625	1	0	0	0	0	0	0	0	0	0	0	0	0	0	1	0	2	0	0	0	0	0	0	0	0	0	0	0	0	0
23111574|F|0-62:C>T-62:C>T	TGCAGACGTGTCTTGCACAGCTCCTCTCTCAAGTACTCCATCCATGCCTGATATAGGGAGAGCACCACC	TGCAGACGTGTCTTGCACAGCTCCTCTCTCAAGTACTCCATCCATGCCTGATATAGGGAGAGCACCACC	KN283927.1_scaffold-8696	2972	10	1.84E-28	62:C>T	62	1	1	0.008021	0.991979	0	0.008021	0	0.015914	0.007957	10.20043	5	1	0	0	0	0	0	0	0	0	0	0	0	0	0	0	0	0	0	0	0	0	0	0	0	0	0	0	0	0	0
23111579|F|0-18:G>A-18:G>A	TGCAGACTACAATAGTTCGGGGCAGCCACGAAGCATATGCGGGCATGAGCGGTTCAGCAGGAATGCCGA	TGCAGACTACAATAGTTCGGGGCAGCCACGAAGCATATGCGGGCATG	KN284731.1_scaffold-9856	11305	1	1.60E-16	18:G>A	18	0.991979	1	0.002695	0.997305	0	0.002695	0	0.005376	0.002688	10.29614	7	1	0	0	0	-	0	0	0	0	0	0	0	0	0	0	0	0	0	0	0	0	0	0	0	0	0	0	0	0	0
23111580|F|0-13:T>C-13:T>C	TGCAGACTACATCTAGCACCCTAAGGGATTTTATCTGGCCTACAGTGGGCCCCTTGGCCCTGCTTTGTC	TGCAGACTACATCTAGCACCCTAAGGGATTTTATCTGGCCTACAGTGGGCCCCTTGGCCCTGCTTTGTC	KN291500.1_scaffold-19679	17901	1	1.84E-28	13:T>C	13	0.991979	1	0.013477	0.986523	0	0.013477	0	0.026591	0.013295	7.72688	4.8	1	0	0	0	0	0	0	0	0	2	0	0	0	0	0	0	0	0	0	0	0	0	0	0	0	0	0	0	0	0
23111588|F|0-8:A>C-8:A>C	TGCAGACTAGATCCAAGACGCTGCCATAGGCAGCACCTGGCAGGCACTGGTTACCAATGTCTCTGCTGC	TGCAGACTAGATCCAAGACGCTGCCATAGGCAGCACCTGGCAGGCACTGGTTACCAATGTCTCTGCTGC	KN290839.1_scaffold-18686	73857	1	1.84E-28	8:A>C	8	0.991979	1	0.002695	0.997305	0	0.002695	0	0.005376	0.002688	8.52371	3	1	0	0	0	0	0	0	0	0	0	0	0	0	0	0	0	0	0	0	0	0	0	0	0	0	0	0	0	0	0
23111604|F|0-6:C>T-6:C>T	TGCAGACTGACTGACCAGCCTTCAGGGCCTGGGGACAAGGTTGTAGCAGAGAACAGCACCTTTCACTTC	TGCAGACTGACTGACCAGCCTTCAGGGCCTGGGGACAAGGTTGTAGCAGAGAACAGCACCTTTCACTTC	KN289674.1_scaffold-16991	130821	1	1.84E-28	6:C>T	6	1	1	0.002674	0.997326	0	0.002674	0	0.005333	0.002667	7.59062	3	1	0	0	0	0	0	0	0	0	0	0	0	0	0	0	0	0	0	0	0	0	0	0	0	0	0	0	0	0	0
23111605|F|0-36:G>A-36:G>A	TGCAGACTGAGAGTAATGGGAGGCTGCTCTTGTGATGAATGCAGTGGGCTGGGAGGTGGAAGATCTGGG	TGCAGACTGAGAGTAATGGGAGGCTGCTCTTGTGATGAATGCAGTGGGCTGGGAGGTGGAAGATCTGGG	KN288937.1_scaffold-15898	21021	1	1.84E-28	36:G>A	36	0.991979	1	0.010782	0.989218	0	0.010782	0	0.021331	0.010665	7.20607	3.5	1	0	0	0	0	0	0	0	0	0	0	0	0	0	0	0	0	0	0	0	0	0	0	0	0	0	0	0	0	0
23112353|F|0-6:T>C-6:T>C	TGCAGATTGAGGGTTCTGGGTGGCCTCCCACCCAGGCTCTACCCTGCCACATGGCTGGCTCAGCATGAG	TGCAGATTGAGGGTTCTGGGTGGCCTCCCACCCAGGCTCTACCCTGCCACATGGCTGGCTCAGCATGAG	KN278953.1_scaffold-1638	64567	1	2.38E-27	6:T>C	6	1	0.991979	0.096257	0.903743	0.008021	0.088235	0.015914	0.173983	0.094948	10.03219	4.95745	1	0	0	0	0	0	0	0	0	0	0	0	0	0	0	0	0	0	0	0	0	0	0	0	0	0	0	0	0	0
23111608|F|0-32:A>T-32:A>T	TGCAGACTGATCATTGCTCTCAGGGTAAGGACACTTGGGCAGGTGACTAAAAGGCAAGGTAAGGTGTGA	TGCAGACTGATCATTGCTCTCAGGGTAAGGACACTTGGGCAGGTGACTAAAAGGCAAGGTAAGGTGTGA	KN279155.1_scaffold-1925	148448	1	1.84E-28	32:A>T	32	0.989305	1	0.002703	0.997297	0	0.002703	0	0.005391	0.002695	6.60776	3	1	0	0	0	0	0	0	0	0	0	0	0	0	0	0	0	0	0	0	0	0	0	0	0	0	0	0	0	0	0
23111613|F|0-12:C>A-12:C>A	TGCAGACTGCAACGGCTTATGTGAATCACTTGAAATCTGTAACAAGCAAGGTTATTATCCACCCTGTAA	TGCAGACTGCAACGGCTTATGTGAATCACTTGAAATCTGTAACAAGCAAGGTTATTATCCACCCTGTAA	KN284890.1_scaffold-10079	376426	10	1.84E-28	12:C>A	12	0.989305	1	0.005405	0.994595	0	0.005405	0	0.010752	0.005376	6.32328	2.5	1	0	0	0	0	0	0	0	0	0	0	0	0	0	0	0	0	0	0	0	0	0	0	0	0	0	0	0	0	0
23111617|F|0-22:C>T-22:C>T	TGCAGACTGCACCCCAGCTGCACCCCTCCCCTTCTCCCCCATGCTGCATGAGCGGTTCAGCAGGAATGC	TGCAGACTGCACCCCAGCTGCACCCCTCCCCTTCTCCCCCATGCTGCATG	KN289335.1_scaffold-16473	82754	1	3.91E-18	22:C>T	22	0.991979	0.997305	0.032345	0.967655	0.002695	0.02965	0.005376	0.062598	0.033987	7.90302	5	1	0	0	0	0	0	0	0	0	0	0	0	0	0	0	0	0	0	0	0	0	0	0	0	0	0	0	0	0	0
23111620|F|0-22:G>A-22:G>A	TGCAGACTGCTCCCTCCCGTTGGGGCAGAGCATTCGTGGCATGAGCGGTTCAGCAGGAATGCCGAGACC	TGCAGACTGCTCCCTCCCGTTGGGGCAGAGCATTCGTGGCATG	KN287352.1_scaffold-13626	116931	1	2.19E-14	22:G>A	22	0.994652	1	0.002688	0.997312	0	0.002688	0	0.005362	0.002681	11.09032	3	1	0	0	0	0	0	0	0	0	0	0	0	0	0	0	0	0	0	0	0	0	0	0	0	0	0	0	0	0	0
23111621|F|0-9:C>A-9:C>A	TGCAGACTGCTCCGGTTGGGATACAAGCCAGGCAGCGAGCCATGGGGCTGCATGAGCGGTTCAGCAGGA	TGCAGACTGCTCCGGTTGGGATACAAGCCAGGCAGCGAGCCATGGGGCTGCATG	KN290498.1_scaffold-18205	70898	1	2.62E-20	9:C>A	9	0.989305	1	0.002703	0.997297	0	0.002703	0	0.005391	0.002695	5.87284	3	1	0	0	0	0	0	0	0	0	0	0	0	0	0	0	0	0	0	0	0	0	0	0	0	0	0	0	0	-	0
23111638|F|0-20:T>G-20:T>G	TGCAGACTGTAGAGGCTCAATTGGGGTCAGGTCCCTTTGTGCCAGGCACTGCATGAGCGGTTCAGCAGG	TGCAGACTGTAGAGGCTCAATTGGGGTCAGGTCCCTTTGTGCCAGGCACTGCATG	KN278207.1_scaffold-583	385880	1	7.54E-21	20:T>G	20	0.962567	1	0.002778	0.997222	0	0.002778	0	0.00554	0.00277	7.11581	3	1	0	0	0	0	0	0	0	0	0	0	0	0	0	0	0	0	0	0	0	0	0	0	0	0	0	0	0	0	0
23111651|F|0-68:T>G-68:T>G	TGCAGACTTGTCCATCCTTCTCCTCTACTCCAAACCAGACCCCTGCAATGGGTCCTGGGGGCATGTGGT	TGCAGACTTGTCCATCCTTCTCCTCTACTCCAAACCAGACCCCTGCAATGGGTCCTGGGGGCATGTGGT	KN285073.1_scaffold-10334	337024	1	1.84E-28	68:T>G	68	1	0.989305	0.082888	0.917112	0.010695	0.072193	0.021162	0.152035	0.086598	9.44301	6	1	2	2	0	2	0	0	0	2	0	0	0	0	2	2	0	0	0	0	0	0	0	0	0	0	2	0	0	0	0
23111660|F|0-50:T>G-50:T>G	TGCAGAGAAAAACAGGCTGACCATGGGCAGTCTGGGTCAGCCAATCAGGGTTGCCCTATGCATTGCTAT	TGCAGAGAAAAACAGGCTGACCATGGGCAGTCTGGGTCAGCCAATCAGGGTTGCCCTATGCATTGCTAT	KN287830.1_scaffold-14322	424920	9	1.84E-28	50:T>G	50	0.983957	1	0.005435	0.994565	0	0.005435	0	0.01081	0.005405	6.07843	3.5	1	0	0	0	0	0	0	0	0	0	0	0	0	0	0	0	0	0	0	0	0	0	0	0	-	0	0	0	0	0
23111670|F|0-22:T>G-22:T>G	TGCAGAGAAAGGTATAAGCTGCTGGCTCCCCACCAAATGCATGAGCGGTTCAGCAGGAATGCCGAGACC	TGCAGAGAAAGGTATAAGCTGCTGGCTCCCCACCAAATGCATG	KN290167.1_scaffold-17723	67384	1	2.19E-14	22:T>G	22	0.967914	1	0.002762	0.997238	0	0.002762	0	0.00551	0.002755	9.44789	3	1	0	0	0	0	0	0	0	0	0	0	0	0	2	0	0	0	0	0	0	0	0	0	0	0	0	0	0	0	0
23111671|F|0-10:G>A-10:G>A	TGCAGAGAAAGTGGCTAGGCATGAGCGGTTCAGCAGGAATGCCGAGACCGATCTCGTATGCCGTCTTCT	TGCAGAGAAAGTGGCTAGGCATGAGCGGTTCAGCAGGAATGCCGAGACCGATCTCGTATGCCGTCTTCT		0	0	999	10:G>A	10	0.994652	1	0.026882	0.973118	0	0.026882	0	0.052318	0.026159	9.26068	3.16667	1	0	0	0	0	0	0	0	0	0	0	0	0	0	0	0	0	0	0	0	0	0	0	0	0	0	0	0	0	0
23111672|F|0-22:C>A-22:C>A	TGCAGAGAAATGCACCCATCAGCTGGTACAGAACTACCAGCCTGGGTTAGTCTGAGAATGCAGCACAAA	TGCAGAGAAATGCACCCATCAGCTGGTACAGAACTACCAGCCTGGGTTAGTCTGAGAATGCAGCACAAA	KN282059.1_scaffold-6027	194026	1	1.84E-28	22:C>A	22	0.973262	1	0.002747	0.997253	0	0.002747	0	0.005479	0.00274	4.17841	3	1	0	0	0	0	0	0	0	0	0	0	0	0	0	0	-	0	0	0	0	0	-	0	0	0	0	0	0	0	0
23111673|F|0-35:C>G-35:C>G	TGCAGAGAACAAGCTGTGGGGAGGGGTTCAAGGCTCAGGGCTAGAGTCAGAACAACAGCATGAGCGGTT	TGCAGAGAACAAGCTGTGGGGAGGGGTTCAAGGCTCAGGGCTAGAGTCAGAACAACAGCATG	KN290563.1_scaffold-18300	95436	1	1.20E-24	35:C>G	35	1	1	0.016043	0.983957	0	0.016043	0	0.031571	0.015785	13.17234	7.75	1	0	0	0	0	0	0	0	0	0	0	0	0	0	0	0	0	0	0	0	0	0	0	0	0	0	0	0	0	0
23111678|F|0-14:G>C-14:G>C	TGCAGAGAACTGGGGAACTTGCATTCTCTAGGGATCAGGGGCAAATGTGGTAACTTGGGTGTTTGGCAT	TGCAGAGAACTGGGGAACTTGCATTCTCTAGGGATCAGGGGCAAATGTGGTAACTTGGGTGTTTGGCAT	KN282747.1_scaffold-7006	292556	1	1.84E-28	14:G>C	14	0.997326	0.989276	0.085791	0.914209	0.010724	0.075067	0.021218	0.156862	0.08904	9.28478	4.95122	1	0	0	0	0	0	0	0	0	0	0	0	0	0	0	0	0	0	0	0	0	0	0	0	0	0	0	0	0	0
23111681|F|0-33:G>A-33:G>A	TGCAGAGAAGCATTCCTCTAAGCTGTGTGGTGTGAGCAGCCTCACAGGCATGAGCGGTTCAGCAGGAAT	TGCAGAGAAGCATTCCTCTAAGCTGTGTGGTGTGAGCAGCCTCACAGGCATG	KN281491.1_scaffold-5235	87505	1	3.14E-19	33:G>A	33	0.986631	0.99729	0.01355	0.98645	0.00271	0.01084	0.005405	0.026733	0.016069	10.72826	4.66667	1	0	0	0	0	0	0	0	0	0	0	0	0	0	0	0	0	0	0	0	0	0	0	0	0	0	0	0	0	0
23111685|F|0-42:T>C-42:T>C	TGCAGAGAAGGACCTGGGGGTTATGGTGGGCCATGAGCTGAATGTAAGCCAACAGCATGAGCGGTTCAG	TGCAGAGAAGGACCTGGGGGTTATGGTGGGCCATGAGCTGAATGTAAGCCAACAGCATG	KN291216.1_scaffold-19273	311604	4	5.12E-23	42:T>C	42	0.994652	0.991935	0.123656	0.876344	0.008065	0.115591	0.015999	0.21673	0.116365	9.4026	5.76786	1	0	0	0	0	2	0	0	0	0	0	2	0	0	0	0	0	0	0	0	0	0	0	0	0	0	2	0	2	0
23111686|F|0-38:G>A-38:G>A	TGCAGAGAAGGACCTGTGGAGTGCAGTATACCTTAAACGGAAAATGAGCCAACAGCATGAGCGGTTCAG	TGCAGAGAAGGACCTGTGGAGTGCAGTATACCTTAAACGGAAAATGAGCCAACAGCATG	KN288340.1_scaffold-15054	2918	1	5.12E-23	38:G>A	38	0.991979	1	0.067385	0.932615	0	0.067385	0	0.125689	0.062845	10.20601	5.6129	1	0	0	0	0	0	0	0	0	0	0	0	0	0	0	0	0	0	0	0	0	0	0	0	0	0	0	0	0	0
23111689|F|0-41:G>A-41:G>A	TGCAGAGAAGGGAAACGCACCCAGGCAGCAGCTTCCCCAGAGCCCATTCATGAGCACATCCACTGCATG	TGCAGAGAAGGGAAACGCACCCAGGCAGCAGCTTCCCCAGAGCCCATTCATGAGCACATCCACTGCATG	KN289834.1_scaffold-17228	50631	1	1.84E-28	41:G>A	41	1	0.994652	0.088235	0.911765	0.005348	0.082888	0.010638	0.1609	0.085769	10.00645	4.97436	1	0	0	0	0	0	0	0	0	0	0	2	0	2	0	0	0	0	0	0	0	0	0	0	0	0	0	0	0	0
23111694|F|0-18:T>G-18:T>G	TGCAGAGAATGCAGGTGTTGTGCTATTTGTGATTTGGAGGAAAGGTATAACCAATGCATGAGCGGTTCA	TGCAGAGAATGCAGGTGTTGTGCTATTTGTGATTTGGAGGAAAGGTATAACCAATGCATG	KN280543.1_scaffold-3901	5110	1	1.47E-23	18:T>G	18	0.989305	1	0.005405	0.994595	0	0.005405	0	0.010752	0.005376	9.61935	4.33333	1	0	0	0	0	0	0	0	0	0	0	0	0	0	0	0	0	0	0	0	0	0	0	0	0	0	0	0	0	0
23111711|F|0-8:C>T-8:C>T	TGCAGAGACGGAGCTATGTTTTGAGGTGGAGTGGATATAGCACACTATAAAAGTGGCATGAGCGGTTCA	TGCAGAGACGGAGCTATGTTTTGAGGTGGAGTGGATATAGCACACTATAAAAGTGGCATG	KN285391.1_scaffold-10795	250834	1	1.47E-23	8:C>T	8	0.94385	1	0.002833	0.997167	0	0.002833	0	0.00565	0.002825	9.83937	7	1	0	0	0	0	0	0	0	0	0	0	0	0	0	0	0	0	0	0	0	0	0	0	0	0	0	0	0	0	0
23111721|F|0-21:T>A-21:T>A	TGCAGAGACTGTGAACTCCAGTGAGGCAGCAGAGGGGAGAGCCAGCCCTGCTGTGGAGCAGAGAGCCCT	TGCAGAGACTGTGAACTCCAGTGAGGCAGCAGAGGGGAGAGCCAGCCCTGCTGTGGAGCAGAGAGCCCT	KN282795.1_scaffold-7083	302196	9	1.84E-28	21:T>A	21	0.991979	1	0.037736	0.962264	0	0.037736	0	0.072624	0.036312	8.51398	4.14286	1	0	0	0	0	0	0	0	0	0	0	0	0	0	0	0	0	0	0	0	0	0	0	0	0	0	0	0	0	0
23111723|F|0-18:C>T-18:C>T	TGCAGAGAGAAAACAGGGCGACAATGGGATGGGCATGAGCGGTTCAGCAGGAATGCCGAGACCGATCTC	TGCAGAGAGAAAACAGGGCGACAATGGGATGGGCATG	KN280412.1_scaffold-3715	177680	1	3.16E-11	18:C>T	18	0.975936	0.991781	0.027397	0.972603	0.008219	0.019178	0.016303	0.053293	0.034798	7.70917	3.81818	1	0	0	0	0	0	0	0	0	0	0	0	0	0	0	0	0	0	0	0	0	0	0	0	0	0	0	0	0	0
23111727|F|0-26:G>A-26:G>A	TGCAGAGAGAATCAAAAAAAGAAAATGCTGAGTGGTGCATGAGCGGTTCAGCAGGAATGCCGAGACCGA	TGCAGAGAGAATCAAAAAAAGAAAATGCTGAGTGGTGCATG		0	0	999	26:G>A	26	0.997326	0.997319	0.016086	0.983914	0.002681	0.013405	0.005348	0.031654	0.018501	9.89722	4.57143	1	0	0	0	0	0	0	0	0	0	0	0	0	0	0	0	0	0	0	0	0	0	0	0	0	0	0	0	0	0
23111730|F|0-37:G>T-37:G>T	TGCAGAGAGACTTTTTCCAGCCCAGGGCGGGTCCCTTGGTCCTGCCAGGCCCAGGCACCATCCAGCCCA	TGCAGAGAGACTTTTTCCAGCCCAGGGCGGGTCCCTTGGTCCTGCCAGGCCCAGGCACCATCCAGCCCA	KN283646.1_scaffold-8297	70692	2	1.84E-28	37:G>T	37	1	0.994652	0.061497	0.938503	0.005348	0.05615	0.010638	0.115431	0.063034	8.59529	3.96552	1	0	0	0	0	0	0	0	0	0	0	0	0	0	0	0	0	0	0	0	0	0	0	0	0	0	0	0	0	0
23111744|F|0-15:G>A-15:G>A	TGCAGAGAGGGCAAGGTGAGCAGAAGCTTTGCACAAGGTTTTACCCAATGCATGAGCGGTTCAGCAGGA	TGCAGAGAGGGCAAGGTGAGCAGAAGCTTTGCACAAGGTTTTACCCAATGCATG	KN293230.1_scaffold-22251	140209	1	2.62E-20	15:G>A	15	0.991979	1	0.018868	0.981132	0	0.018868	0	0.037024	0.018512	10.19481	3.33333	1	0	0	0	0	0	0	0	0	0	0	0	0	0	0	0	0	0	0	0	0	0	0	0	0	0	0	0	2	0
23111755|F|0-16:G>A-16:G>A	TGCAGAGATGGCCAACGAATCTACCCCACAGGGGATGCAGGGCAGAGAGCCTGCTACCCAAAACATGCC	TGCAGAGATGGCCAACGAATCTACCCCACAGGGGATGCAGGGCAGAGAGCCTGCTACCCAAAACATGCC	KN280802.1_scaffold-4244	770458	1	1.84E-28	16:G>A	16	1	1	0.02139	0.97861	0	0.02139	0	0.041866	0.020933	8.14681	5.375	1	0	0	0	0	2	0	0	0	0	0	0	0	0	0	0	0	0	0	0	0	0	0	0	0	0	0	0	0	0
23111757|F|0-21:C>G-21:C>G	TGCAGAGATTAAACTGAGAAGCAAGTGAACACAAATTCACTTTTGATTTCAGAAATGAAGCCAGAGGAT	TGCAGAGATTAAACTGAGAAGCAAGTGAACACAAATTCACTTTTGATTTCAGAAATGAAGCCAGAGGAT	KN292651.1_scaffold-21363	378334	9	1.84E-28	21:C>G	21	0.986631	1	0.04065	0.95935	0	0.04065	0	0.077996	0.038998	6.96983	3.17391	1	0	0	0	0	0	0	0	0	0	0	0	0	0	0	0	0	0	0	0	0	0	0	0	0	0	0	0	0	0
23111771|F|0-19:T>G-19:T>G	TGCAGAGCAAGTGTGGGTGTAGGGTCAGCCAGCAGCTGCCTGTGCCAGGGCCTGCCTGACCAATTTACC	TGCAGAGCAAGTGTGGGTGTAGGGTCAGCCAGCAGCTGCCTGTGCCAGGGCCTGCCTGACCAATTTACC	KN283656.1_scaffold-8314	84542	1	1.84E-28	19:T>G	19	1	1	0.024064	0.975936	0	0.024064	0	0.04697	0.023485	7.90832	5.18182	1	0	0	0	0	0	0	0	0	0	2	0	0	0	0	0	0	0	0	0	0	0	0	0	0	0	0	0	0	0
23111781|F|0-63:T>G-63:T>G	TGCAGAGCACCGGGAAGGCCAAGGTAAGAGCCCCGGGCCAGCTGCGGGTTGCCATTGGCGGGATGCCCA	TGCAGAGCACCGGGAAGGCCAAGGTAAGAGCCCCGGGCCAGCTGCGGGTTGCCATTGGCGGGATGCCCA	KN284161.1_scaffold-9030	141631	1	8.58E-27	63:T>G	63	0.967914	0.005525	1	0	0.994475	0.005525	0.010989	0	0.005494	3.5	3.77079	1	1	-	1	1	1	1	1	1	1	1	1	1	1	1	1	1	1	1	1	1	1	1	1	1	1	1	1	-	1
23111783|F|0-8:A>G-8:A>G	TGCAGAGCACGTGAGCTGATGCAGCTGGTGCTTCATCACATGCATTTGTATAAATGGCAAAATGAGCAT	TGCAGAGCACGTGAGCTGATGCAGCTGGTGCTTCATCACATGCATTTGTATAAATGGCAAAATGAGCAT	KN293028.1_scaffold-21941	16939	4	1.84E-28	8:A>G	8	1	0.991979	0.09893	0.90107	0.008021	0.090909	0.015914	0.178286	0.0971	10.39829	5.23529	1	0	0	2	0	0	0	0	0	0	0	0	0	0	0	0	0	0	0	2	0	0	0	0	0	0	0	0	2	0
23111790|F|0-56:G>A-56:G>A	TGCAGAGCACTTTAAAAGTGGCCGATCATGCAACAACTTAACCCTGATCTAGTAAGGGATTTCATGAAG	TGCAGAGCACTTTAAAAGTGGCCGATCATGCAACAACTTAACCCTGATCTAGTAAGGGATTTCATGAAG	KN285228.1_scaffold-10544	14677	1	1.84E-28	56:G>A	56	0.997326	0.97319	0.206434	0.793566	0.02681	0.179625	0.052182	0.327638	0.18991	7.54405	4.35484	1	0	0	0	0	0	0	0	0	0	0	0	0	0	0	0	0	0	0	1	0	0	0	0	0	0	0	0	2	0
23111794|F|0-20:G>A-20:G>A	TGCAGAGCAGCCTGTCTGTGGGCTGCGGATGGCTACAACAGGGTAGGAGGGGCATGAGCGGTTCAGCAG	TGCAGAGCAGCCTGTCTGTGGGCTGCGGATGGCTACAACAGGGTAGGAGGGGCATG		0	0	999	20:G>A	20	0.97861	1	0.002732	0.997268	0	0.002732	0	0.00545	0.002725	7.11947	3	1	0	0	0	0	0	0	0	0	0	0	0	0	0	0	0	0	0	0	0	0	0	0	0	0	0	0	0	0	0
23111797|F|0-23:A>T-23:A>T	TGCAGAGCAGCTGGAAAGCAAAGACTCCAAGCCAACCAGCCAGTTCACTCACAGAGCTCGTAGCACATG	TGCAGAGCAGCTGGAAAGCAAAGACTCCAAGCCAACCAGCCAGTTCACTCACAGAGCTCGTAGCACATG	KN279107.1_scaffold-1864	2681	2	1.84E-28	23:A>T	23	1	1	0.002674	0.997326	0	0.002674	0	0.005333	0.002667	9.69444	3	1	0	0	0	0	0	0	0	0	0	0	0	0	0	0	0	0	0	0	0	0	0	0	0	0	0	0	0	0	0
23111806|F|0-56:G>A-56:G>A	TGCAGAGCATTGCAGTGAGCATGTCCTCTGAGCGCCTTTCTTCTGCACCAGCCAGCGAGTTCTCCTCCC	TGCAGAGCATTGCAGTGAGCATGTCCTCTGAGCGCCTTTCTTCTGCACCAGCCAGCGAGTTCTCCTCCC	KN281037.1_scaffold-4561	237839	1	1.84E-28	56:G>A	56	0.994652	1	0.013441	0.986559	0	0.013441	0	0.02652	0.01326	6.72473	3.8	1	0	0	0	0	0	0	0	0	0	0	0	0	0	0	0	0	0	0	0	0	0	0	0	0	0	0	0	0	0
23111812|F|0-10:G>A-10:G>A	TGCAGAGCCAGCACTTGTCCAGATCAGAGACGCACAGAAGCCAAAGCACGCCCTTTCCAGGACACCGCT	TGCAGAGCCAGCACTTGTCCAGATCAGAGACGCACAGAAGCCAAAGCACGCCCTTTCCAGGACACCGCT	KN282798.1_scaffold-7087	132959	1	8.58E-27	10:G>A	10	0.997326	0.994638	0.058981	0.941019	0.005362	0.053619	0.010666	0.111005	0.060836	7.47845	3.33333	1	0	0	0	0	0	0	0	0	0	0	0	0	0	0	0	0	0	0	0	0	0	0	0	2	2	2	0	0	0
23111815|F|0-28:G>C-28:G>C	TGCAGAGCCAGGCCAGACTAATGCAATGGCTCTTCTAGGTATGTGTGAGATTTGGCATGGGAGCATGAG	TGCAGAGCCAGGCCAGACTAATGCAATGGCTCTTCTAGGTATGTGTGAGATTTGGCATGGGAGCATGAG	KN287005.1_scaffold-13142	26856	1	2.38E-27	28:G>C	28	0.997326	0.994638	0.045576	0.954424	0.005362	0.040214	0.010666	0.086998	0.048832	7.84599	4.16667	1	0	0	0	0	0	0	0	0	0	2	0	0	0	0	0	0	0	0	0	0	0	0	0	0	0	0	0	0	0
23111818|F|0-45:T>G-45:T>G	TGCAGAGCCAGGTTGAACGCATGGCTTCTTCCGGTAAAGCGTGGGTTTTTTTTCCCATGTCTGTCAGCA	TGCAGAGCCAGGTTGAACGCATGGCTTCTTCCGGTAAAGCGTGGGTTTTTTTTCCCATGTCTGTCAGCA	KN281886.1_scaffold-5796	134773	1	1.84E-28	45:T>G	45	0.983957	1	0.01087	0.98913	0	0.01087	0	0.021503	0.010751	6.05628	3	1	0	0	0	0	0	0	0	0	0	0	0	0	0	0	0	0	0	0	0	0	0	0	0	0	0	0	0	0	0
23111828|F|0-58:A>C-58:A>C	TGCAGAGCCCATCTGAGCAGTGCCAGAGCTCTGTCCTGAGAAGATGCAGGGCATGGCAATGCATGAGCG	TGCAGAGCCCATCTGAGCAGTGCCAGAGCTCTGTCCTGAGAAGATGCAGGGCATGGCAATGCATG	KN288149.1_scaffold-14772	35588	1	2.80E-26	58:A>C	58	0.997326	1	0.029491	0.970509	0	0.029491	0	0.057242	0.028621	10.86752	3.76923	1	0	0	0	0	0	0	0	0	0	0	0	0	0	0	0	0	0	0	0	0	0	0	0	0	0	0	0	0	0
23111830|F|0-10:C>T-10:C>T	TGCAGAGCCCCAGCATTGTTCACTGCTGGTGGCAGGTGCATGAGCGGTTCAGCAGGAATGCCGAGACCG	TGCAGAGCCCCAGCATTGTTCACTGCTGGTGGCAGGTGCATG	KN286306.1_scaffold-12116	15088	1	7.45E-14	10:C>T	10	0.994652	0.981183	0.072581	0.927419	0.018817	0.053763	0.036926	0.134625	0.085776	9.64097	6.19355	1	0	0	0	0	0	0	0	0	0	0	0	0	0	0	0	0	0	0	0	0	0	0	0	0	0	0	0	0	0
23111847|F|0-23:T>G-23:T>G	TGCAGAGCCCTGGCTTGGCTGGTTGCTGGCAGCAGGTGCATGAGCGGTTCAGCAGGAATGCCGAGACCG	TGCAGAGCCCTGGCTTGGCTGGTTGCTGGCAGCAGGTGCATG	KN287500.1_scaffold-13842	17165	1	7.45E-14	23:T>G	23	0.97861	1	0.002732	0.997268	0	0.002732	0	0.00545	0.002725	7.77024	3	1	0	0	0	0	0	0	0	0	0	0	0	0	0	0	0	0	0	0	0	0	0	0	0	0	0	0	0	0	0
23111849|F|0-20:C>T-20:C>T	TGCAGAGCCCTTGGGATTTCCAGATTTGATGCACAGACCAAATTAGAGTCCAGGGCATGAGCGGTTCAG	TGCAGAGCCCTTGGGATTTCCAGATTTGATGCACAGACCAAATTAGAGTCCAGGGCATG	KN287312.1_scaffold-13566	41076	1	5.12E-23	20:C>T	20	0.967914	1	0.002762	0.997238	0	0.002762	0	0.00551	0.002755	6.67035	6	1	0	0	0	0	0	0	0	0	0	0	0	0	0	0	0	0	0	0	0	0	0	0	0	0	0	0	0	0	0
23111853|F|0-22:A>G-22:A>G	TGCAGAGCCCTTTCCAACGAACAGTAAAAGAAGAAAGGCTGAAAAATGTAACTGGAAGTCCTTCTAAGG	TGCAGAGCCCTTTCCAACGAACAGTAAAAGAAGAAAGGCTGAAAAATGTAACTGGAAGTCCTTCTAAGG	KN286063.1_scaffold-11757	30292	1	8.58E-27	22:A>G	22	0.962567	0.002778	1	0	0.997222	0.002778	0.00554	0	0.00277	5	4.5553	1	1	1	1	1	1	1	1	1	1	-	1	1	1	1	1	1	1	1	1	1	1	1	1	-	1	1	1	1	1
23111854|F|0-33:C>T-33:C>T	TGCAGAGCCGGGACAACTACCTCTCCATGGTCACCAAAACAATGTAGTGGCATGAGCGGTTCAGCAGGA	TGCAGAGCCGGGACAACTACCTCTCCATGGTCACCAAAACAATGTAGTGGCATG	KN284955.1_scaffold-10171	126681	1	2.62E-20	33:C>T	33	0.965241	1	0.00554	0.99446	0	0.00554	0	0.011019	0.005509	10.15929	7	1	0	0	0	0	0	0	0	0	0	0	0	0	0	0	0	0	0	0	0	0	0	0	0	0	0	0	0	0	0
23111855|F|0-22:T>G-22:T>G	TGCAGAGCCGGGATCAGGGCCATCCCCTGGGTGAGAGTGGGAGCACAGCATGAGCGGTTCAGCAGGAAT	TGCAGAGCCGGGATCAGGGCCATCCCCTGGGTGAGAGTGGGAGCACAGCATG	KN283384.1_scaffold-7922	17492	1	3.14E-19	22:T>G	22	0.997326	1	0.002681	0.997319	0	0.002681	0	0.005348	0.002674	10.54818	3	1	0	0	0	0	0	0	0	0	0	0	0	0	0	2	0	0	0	0	0	0	0	0	0	0	0	0	0	0	0
23111864|F|0-54:C>T-54:C>T	TGCAGAGCCTGGCCAGAAGCTGGAGTGTGGCTCTGGTTGGTCAGGCTCCAGTTTCAGGTGGTGCATGAG	TGCAGAGCCTGGCCAGAAGCTGGAGTGTGGCTCTGGTTGGTCAGGCTCCAGTTTCAGGTGGTGCATGAG	KN278387.1_scaffold-840	36745	2	2.38E-27	54:C>T	54	0.997326	1	0.016086	0.983914	0	0.016086	0	0.031654	0.015827	7.94861	4.28571	1	0	0	0	0	0	0	0	0	0	0	0	0	0	0	0	0	0	0	0	0	0	0	0	0	0	0	0	0	0
23111870|F|0-56:C>T-56:C>T	TGCAGAGCGCCGTCATTTGAACGGACGTTTTGTTGAATGAGAGATCTATTTTTGAACGGAAACAGATAG	TGCAGAGCGCCGTCATTTGAACGGACGTTTTGTTGAATGAGAGATCTATTTTTGAACGGAAACAGATAG	KN283531.1_scaffold-8132	190678	1	1.84E-28	56:C>T	56	0.997326	1	0.048257	0.951743	0	0.048257	0	0.091857	0.045929	6.96146	4.28571	1	0	0	0	0	0	0	0	0	0	0	0	0	0	0	0	0	0	0	0	0	0	0	0	0	0	0	0	0	0
23111873|F|0-8:G>A-8:G>A	TGCAGAGCGGCATGAGAGTGCTACAGTGTGGGCTAGCCAGGAGGCAGCCCCTCACACTGTAATACCCTC	TGCAGAGCGGCATGAGAGTGCTACAGTGTGGGCTAGCCAGGAGGCAGCCCCTCACACTGTAATACCCTC	KN291630.1_scaffold-19868	7290	1	1.84E-28	8:G>A	8	0.994652	0.997312	0.034946	0.965054	0.002688	0.032258	0.005362	0.06745	0.036406	5.57484	2.93333	1	0	0	0	0	0	0	0	0	0	0	2	0	0	0	0	0	0	0	0	0	0	0	0	0	0	0	0	0	0
23111874|F|0-35:G>C-35:G>C	TGCAGAGCGGCTGGCTGGGGCGCAGGGTGCTTCAGGTCACAGGCTCCGCAGCATGAGCGGTTCAGCAGG	TGCAGAGCGGCTGGCTGGGGCGCAGGGTGCTTCAGGTCACAGGCTCCGCAGCATG	KN287246.1_scaffold-13470	93273	1	7.54E-21	35:G>C	35	0.989305	0.986486	0.156757	0.843243	0.013514	0.143243	0.026662	0.264368	0.145515	9.68928	7.64865	1	0	0	0	0	0	0	0	0	0	2	0	0	0	0	0	0	0	0	0	0	0	0	0	0	0	0	0	-	0
23111875|F|0-40:G>A-40:G>A	TGCAGAGCGGGGAATAACCCCCCTACTTGCCCCTCGCCACGTAAGGGGGCATGAGCGGTTCAGCAGGAA	TGCAGAGCGGGGAATAACCCCCCTACTTGCCCCTCGCCACGTAAGGGGGCATG	KN282555.1_scaffold-6710	82157	1	4.22E-18	40:G>A	40	0.991979	0.008086	0.997305	0.002695	0.991914	0.005391	0.016042	0.005376	0.010709	9	8.7413	1	1	1	1	1	1	1	1	1	1	1	1	1	1	1	-	1	1	1	1	1	1	1	1	1	1	1	1	1	1
23111876|F|0-67:A>G-67:A>G	TGCAGAGCGGGGACGGTGGAACAAGCCACGCACAGCTTGCCCAGGGCCACCGGGGGGATGGGGGGAGAG	TGCAGAGCGGGGACGGTGGAACAAGCCACGCACAGCTTGCCCAGGGCCACCGGGGGGATGGGGGGAGAG	KN287155.1_scaffold-13342	197577	1	1.84E-28	67:A>G	67	0.970588	1	0.002755	0.997245	0	0.002755	0	0.005494	0.002747	4.54241	3	1	0	0	0	-	0	0	0	0	0	0	0	0	0	0	0	0	0	0	0	0	0	0	0	0	0	0	0	0	0
23111880|F|0-17:T>C-17:T>C	TGCAGAGCTAACCAGTATAGTGCTACCGAGCCTATAAGCATGAGCGGTTCAGCAGGAATGCCGAGACCG	TGCAGAGCTAACCAGTATAGTGCTACCGAGCCTATAAGCATG	KN283328.1_scaffold-7848	263032	1	7.45E-14	17:T>C	17	0.997326	1	0.002681	0.997319	0	0.002681	0	0.005348	0.002674	13.5546	5	1	0	0	0	0	0	0	0	0	0	0	0	0	0	0	0	0	0	0	0	0	0	0	0	0	0	0	0	0	0
23111882|F|0-40:G>A-40:G>A	TGCAGAGCTAATTAGTTAACTCTGAAGTAAAGCTCATGTGGAGCCCAGCCTGTTCTCTGAAGTCTGGGC	TGCAGAGCTAATTAGTTAACTCTGAAGTAAAGCTCATGTGGAGCCCAGCCTGTTCTCTGAAGTCTGGGC	KN279895.1_scaffold-2998	436670	1	1.84E-28	40:G>A	40	0.970588	0.953168	0.212121	0.787879	0.046832	0.165289	0.089277	0.334252	0.211765	5.93981	3.86869	1	0	2	0	0	2	0	0	0	0	0	2	0	0	0	0	2	0	0	0	0	0	0	0	0	0	0	0	0	0
23111891|F|0-54:G>A-54:G>A	TGCAGAGCTCCACGTGGGCTAAATCCAGCTGAGGTATGCAGCAGCAGCAGTTCTGCTCTAACCCAGGGC	TGCAGAGCTCCACGTGGGCTAAATCCAGCTGAGGTATGCAGCAGCAGCAGTTCTGCTCTAACCCAGGGC	KN290207.1_scaffold-17781	27692	1	1.84E-28	54:G>A	54	0.997326	0.997319	0.024129	0.975871	0.002681	0.021448	0.005348	0.047093	0.02622	7.77586	4.81818	1	0	0	0	0	0	0	0	0	0	0	0	0	0	0	0	0	0	0	0	0	0	0	0	0	0	0	0	0	0
23111894|F|0-29:G>A-29:G>A	TGCAGAGCTCCCGCACTGTGCTGGGGAGCGCCGCAGCACAGTGCAGCACACCTGCTCTGCATGTGCTGC	TGCAGAGCTCCCGCACTGTGCTGGGGAGCGCCGCAGCACAGTGCAGCACACCTGCTCTGCATGTGCTGC	KN278393.1_scaffold-847	215934	1	1.84E-28	29:G>A	29	0.986631	1	0.00542	0.99458	0	0.00542	0	0.010781	0.005391	4.53712	3.5	1	0	-	0	0	0	0	0	0	0	0	0	0	0	0	0	0	0	0	0	0	0	0	0	0	0	0	0	0	0
23111897|F|0-25:A>C-25:A>C	TGCAGAGCTCGTTTAGCCATTCTGAACATCAGGTCGCTAGCTGGAGCATGAGCGGTTCAGCAGGAATGC	TGCAGAGCTCGTTTAGCCATTCTGAACATCAGGTCGCTAGCTGGAGCATG	KN291933.1_scaffold-20318	2293	1	3.91E-18	25:A>C	25	0.994652	1	0.016129	0.983871	0	0.016129	0	0.031738	0.015869	10.35118	6	1	0	0	0	0	0	0	0	0	0	0	0	0	0	0	0	0	0	0	0	0	0	0	0	0	0	0	0	0	0
23111899|F|0-44:C>T-44:C>T	TGCAGAGCTCTGCTGTCCACACCACCTGGCTGCATTCCTGGTCACATGCATGAGCGGTTCAGCAGGAAT	TGCAGAGCTCTGCTGTCCACACCACCTGGCTGCATTCCTGGTCACATGCATG	KN287152.1_scaffold-13339	88292	1	3.14E-19	44:C>T	44	0.994652	0.862903	0.556452	0.443548	0.137097	0.419355	0.236602	0.493626	0.365114	9.96992	8.95472	1	1	1	1	1	2	1	2	1	1	2	2	2	0	0	2	2	2	2	2	2	0	1	2	0	0	0	1	2	0
23111902|F|0-18:C>T-18:C>T	TGCAGAGCTGAGCAGGTGCGTGGCACCCTTTGGGGAGCAGCAGGACAGCGAGCGTGCATGAGCGGTTCA	TGCAGAGCTGAGCAGGTGCGTGGCACCCTTTGGGGAGCAGCAGGACAGCGAGCGTGCATG	KN282174.1_scaffold-6191	36264	1	1.47E-23	18:C>T	18	1	0.989305	0.122995	0.877005	0.010695	0.112299	0.021162	0.215734	0.118448	9.56466	5.84211	1	0	0	0	0	0	0	0	0	0	0	0	0	0	0	0	2	0	0	0	0	0	0	0	0	0	2	1	0	0
23111925|F|0-15:A>G-15:A>G	TGCAGAGCTGTGCCCAGAACTGTGCAGCTGGCCGTTGGGCAGCAGCGGCAGCATGGTGGTGGCCTTGCG	TGCAGAGCTGTGCCCAGAACTGTGCAGCTGGCCGTTGGGCAGCAGCGGCAGCATGGTGGTGGCCTTGCG	KN280794.1_scaffold-4233	210589	1	1.84E-28	15:A>G	15	1	1	0.05615	0.94385	0	0.05615	0	0.105994	0.052997	11.10278	4.23077	1	0	0	0	0	0	0	0	0	2	0	2	0	0	2	0	0	0	0	0	0	0	0	0	0	0	0	2	0	0
23111931|F|0-13:T>C-13:T>C	TGCAGAGCTGTGTTAAACTAACCTAATGCCTCTTCTGGGCATGTACTATACTCAGTGTAGAGGCATGAG	TGCAGAGCTGTGTTAAACTAACCTAATGCCTCTTCTGGGCATGTACTATACTCAGTGTAGAGGCATGAG	KN289396.1_scaffold-16564	1357	1	2.38E-27	13:T>C	13	0.981283	1	0.038147	0.961853	0	0.038147	0	0.073384	0.036692	7.16957	4.46667	1	0	0	0	0	0	0	0	0	0	0	0	0	0	0	0	0	0	0	0	0	0	0	0	0	0	0	0	0	0
23118535|F|0-6:T>G-6:T>G	TGCAGATGAACCTTTTGGGGATAGGAAGAAGGCAGCCTACGGGCCTCCAGAGGTCAATCCCATTTCACA	TGCAGATGAACCTTTTGGGGATAGGAAGAAGGCAGCCTACGGGCCTCCAGAGGTCAATCCCATTTCACA	KN287377.1_scaffold-13660	56761	1	3.99E-25	6:T>G	6	0.852941	0.00627	0.996865	0.003135	0.99373	0.003135	0.012461	0.00625	0.009355	7.33333	4.55668	1	1	1	1	1	1	1	1	1	-	1	1	1	1	1	1	1	1	1	1	1	1	1	1	1	1	1	1	1	-
23111944|F|0-41:T>C-41:T>C	TGCAGAGGACTGAAGACAGGGGGCAGTGCCAAGCTGCTTGATGCCACCAATGGGTGGCTCAGCATGAGC	TGCAGAGGACTGAAGACAGGGGGCAGTGCCAAGCTGCTTGATGCCACCAATGGGTGGCTCAGCATGAGC	KN279300.1_scaffold-2137	14542	1	8.58E-27	41:T>C	41	1	0.991979	0.074866	0.925134	0.008021	0.066845	0.015914	0.138523	0.077218	9.79355	5.38235	1	0	0	0	0	0	0	0	0	0	0	0	0	0	0	0	0	0	0	0	0	0	0	0	0	0	0	0	0	0
23111945|F|0-24:T>C-24:T>C	TGCAGAGGACTTCCCCAGGGAGACTGGGGGAGAGGGCCTCCCTGACACCTGAGCAGGGCCAACTGGAGA	TGCAGAGGACTTCCCCAGGGAGACTGGGGGAGAGGGCCTCCCTGACACCTGAGCAGGGCCAACTGGAGA	KN291773.1_scaffold-20075	59687	3	1.84E-28	24:T>C	24	0.994652	1	0.002688	0.997312	0	0.002688	0	0.005362	0.002681	7.75054	3	1	0	0	0	0	0	0	0	0	0	0	0	0	0	0	0	0	0	0	0	0	0	0	0	0	0	0	0	0	0
23111946|F|0-8:A>G-8:A>G	TGCAGAGGAGAAGACAAATACAGGGACCTTTTTCACCATGGAGACTGACTAGGACCTGTTCAAACAGGG	TGCAGAGGAGAAGACAAATACAGGGACCTTTTTCACCATGGAGACTGACTAGGACCTGTTCAAACAGGG	KN284145.1_scaffold-9007	24520	1	1.84E-28	8:A>G	8	0.986631	1	0.04607	0.95393	0	0.04607	0	0.087896	0.043948	6.90239	3.68421	1	0	0	0	0	0	0	0	0	0	0	0	0	0	0	0	0	0	0	0	0	0	0	0	0	0	0	0	0	0
23111958|F|0-15:A>G-15:A>G	TGCAGAGGATCTGGAAACGGAGCCCTCTGGAGCCCTCTTAAGTGAGCCAGCAGGGAGTTGCGTGCATGA	TGCAGAGGATCTGGAAACGGAGCCCTCTGGAGCCCTCTTAAGTGAGCCAGCAGGGAGTTGCGTGCATGA	KN281836.1_scaffold-5727	105869	5	1.84E-28	15:A>G	15	0.997326	1	0.008043	0.991957	0	0.008043	0	0.015956	0.007978	7.50641	4	1	0	0	0	0	0	0	0	0	0	0	0	0	0	0	0	0	0	0	0	0	0	0	0	0	0	0	0	2	0
23111959|F|0-24:T>C-24:T>C	TGCAGAGGATGGCGAGCAGGAATCTGGGCACTTGACTTAGGACTTGGTTACTGCTTCTACACGCTGCAT	TGCAGAGGATGGCGAGCAGGAATCTGGGCACTTGACTTAGGACTTGGTTACTGCTTCTACACGCTGCAT	KN284647.1_scaffold-9739	77343	1	1.84E-28	24:T>C	24	0.991979	0.897574	0.299191	0.700809	0.102426	0.196765	0.18387	0.419352	0.301611	7.13494	4.48905	1	0	0	0	0	0	0	0	0	0	0	0	0	0	0	0	0	0	0	0	0	0	0	0	0	0	0	0	0	0
23111961|F|0-37:C>T-37:C>T	TGCAGAGGCAAAAGCAAGGGTGAGTTGAGTGAGGCCCCGGCCAGGTGGGATTAACGTGCTCAGGAGGCA	TGCAGAGGCAAAAGCAAGGGTGAGTTGAGTGAGGCCCCGGCCAGGTGGGATTAACGTGCTCAGGAGGCA	KN280827.1_scaffold-4277	36270	2	1.84E-28	37:C>T	37	0.991979	0.994609	0.045822	0.954178	0.005391	0.040431	0.010724	0.087445	0.049084	6.95032	3	1	0	0	0	0	0	0	0	0	0	0	0	0	0	0	0	0	0	0	0	0	0	0	0	0	0	0	0	0	0
23111970|F|0-29:T>C-29:T>C	TGCAGAGGCAGGGTGGGAGGAGGCAGTCATCAGGTAGGGACAGATGACAGGAGGGGGAAGATACTGGCA	TGCAGAGGCAGGGTGGGAGGAGGCAGTCATCAGGTAGGGACAGATGACAGGAGGGGGAAGATACTGGCA	KN281446.1_scaffold-5176	8125	1	1.84E-28	29:T>C	29	0.991979	1	0.018868	0.981132	0	0.018868	0	0.037024	0.018512	7.07725	4.25	1	0	0	0	0	0	0	0	0	0	0	0	0	0	0	0	0	0	0	0	0	0	0	0	0	0	2	0	0	0
23111977|F|0-11:G>C-11:G>C	TGCAGAGGCCCGGGGGGAGGGAAGCATGGTGGAAGCCCAAGCCCACAGCCTGCCCTGTGTACAGATCTG	TGCAGAGGCCCGGGGGGAGGGAAGCATGGTGGAAGCCCAAGCCCACAGCCTGCCCTGTGTACAGATCTG	KN278982.1_scaffold-1682	114568	1	1.84E-28	11:G>C	11	0.986631	1	0.01626	0.98374	0	0.01626	0	0.031992	0.015996	5.51422	4.33333	1	0	0	0	0	0	0	0	0	0	0	0	-	0	0	0	0	0	0	0	0	0	0	0	0	0	0	0	0	0
23111992|F|0-21:C>G-21:C>G	TGCAGAGGCTGGTAAGACTTTCTATTAACTTCTGCCGGGTCATAACAACAGGAGAAAGGGGACTTAGAT	TGCAGAGGCTGGTAAGACTTTCTATTAACTTCTGCCGGGTCATAACAACAGGAGAAAGGGGACTTAGAT	KN291250.1_scaffold-19328	376	2	1.84E-28	21:C>G	21	0.989305	0.978378	0.156757	0.843243	0.021622	0.135135	0.042308	0.264368	0.153338	7.75442	4.06944	1	0	0	0	0	0	0	0	0	2	0	2	0	0	0	0	2	0	0	0	2	2	0	0	0	0	0	0	0	2
23111995|F|0-30:A>T-30:A>T	TGCAGAGGCTTGCCTACTTCTCCACAATAAAACTTATTTAGTTCTTCTCATCCATGCATGAGCGGTTCA	TGCAGAGGCTTGCCTACTTCTCCACAATAAAACTTATTTAGTTCTTCTCATCCATGCATG	KN280059.1_scaffold-3229	121666	1	1.47E-23	30:A>T	30	0.941176	0.997159	0.002841	0.997159	0.002841	0	0.005666	0.005666	0.005666	7.49657	5.5	1	0	0	0	0	0	0	0	0	0	0	0	0	0	0	0	0	0	0	0	0	0	0	0	0	0	0	0	0	0
23112006|F|0-9:A>G-9:A>G	TGCAGAGGGAGCAGGGGAAAGTCGCCTGAATTTGCTGCAAACCAAAACCAATGATTTTTTGCACAGTGC	TGCAGAGGGAGCAGGGGAAAGTCGCCTGAATTTGCTGCAAACCAAAACCAATGATTTTTTGCACAGTGC	KN287246.1_scaffold-13470	90277	1	1.84E-28	9:A>G	9	1	0.997326	0.082888	0.917112	0.002674	0.080214	0.005333	0.152035	0.078684	7.89722	4.4878	1	0	0	0	0	0	0	0	0	0	0	0	0	0	2	0	2	0	0	0	0	0	0	0	0	0	0	0	0	0
23112018|F|0-22:C>A-22:C>A	TGCAGAGGGGCGGGCTGGGGCACGAGGGTGCTATAGCGTGGGACTAGCCAGCATGAGCGGTTCAGCAGG	TGCAGAGGGGCGGGCTGGGGCACGAGGGTGCTATAGCGTGGGACTAGCCAGCATG	KN288274.1_scaffold-14954	48261	1	7.54E-21	22:C>A	22	0.994652	1	0.002688	0.997312	0	0.002688	0	0.005362	0.002681	7.70968	3	1	0	0	0	0	-	0	0	0	0	0	0	0	0	0	0	0	0	0	0	0	0	0	0	0	0	0	0	0	0
23112024|F|0-17:T>C-17:T>C	TGCAGAGGGGCTTTGTCTGGCCTGTGGTTGGTCCTTTGGTCCCACTTGGTTGAGGTGCTGCCCAGCTCT	TGCAGAGGGGCTTTGTCTGGCCTGTGGTTGGTCCTTTGGTCCCACTTGGTTGAGGTGCTGCCCAGCTCT	KN284846.1_scaffold-10023	118415	1	1.84E-28	17:T>C	17	1	0.933155	0.278075	0.721925	0.066845	0.21123	0.124753	0.401498	0.263126	8.30068	4.98438	1	0	0	0	0	0	0	0	0	0	0	0	0	0	2	0	2	0	0	0	0	0	0	0	0	0	0	0	0	0
23112040|F|0-29:A>G-29:A>G	TGCAGAGGTCCCCACCCCAAGGGGAGTGCAGCAGGTCAGGGAGCCCCAAGCCCACAGTGGGCAGCATGA	TGCAGAGGTCCCCACCCCAAGGGGAGTGCAGCAGGTCAGGGAGCCCCAAGCCCACAGTGGGCAGCATGA	KN287987.1_scaffold-14550	24830	1	6.63E-28	29:A>G	29	0.994652	1	0.002688	0.997312	0	0.002688	0	0.005362	0.002681	9.45591	3	1	0	0	0	0	0	0	0	0	0	0	0	0	0	0	0	0	0	0	0	0	0	0	0	0	0	0	0	0	0
23110223|F|0-21:C>G-21:C>G	TGCAGAGGTCCTCTCTCCTCACTGTCCCTCACCTCTTAGCATGAGCGGTTCAGCAGGAATGCCGAGACC	TGCAGAGGTCCTCTCTCCTCACTGTCCCTCACCTCTTAGCATG	KN278436.1_scaffold-908	27267	1	2.19E-14	21:C>G	21	0.86631	1	0.003086	0.996914	0	0.003086	0	0.006154	0.003077	11.28747	3	1	0	0	0	-	0	0	0	0	0	0	0	0	0	-	0	0	0	-	0	0	-	0	0	0	-	-	0	0	0
23112044|F|0-52:A>G-52:A>G	TGCAGAGGTGTACAGCACCTGGAGAGCCCGCATGAAGCAGGGCCCAAAGCCAAAGGCCCGCAGCATGAG	TGCAGAGGTGTACAGCACCTGGAGAGCCCGCATGAAGCAGGGCCCAAAGCCAAAGGCCCGCAGCATGAG	KN287180.1_scaffold-13373	5020	10	2.38E-27	52:A>G	52	0.986631	0.99458	0.04336	0.95664	0.00542	0.03794	0.010781	0.082961	0.046871	6.39693	4.26316	1	0	0	0	0	0	0	0	0	0	0	0	0	0	0	0	0	0	0	0	0	0	0	0	0	0	0	0	0	0
23112050|F|0-22:T>G-22:T>G	TGCAGAGTAAACACCTCATGAATAGGGAACCTTCATATTTCTCTCAACGCTATTGTTTGAGTACTTTGG	TGCAGAGTAAACACCTCATGAATAGGGAACCTTCATATTTCTCTCAACGCTATTGTTTGAGTACTTTGG	KN285483.1_scaffold-10927	226871	1	1.84E-28	22:T>G	22	0.973262	1	0.002747	0.997253	0	0.002747	0	0.005479	0.00274	8.49342	3	1	0	0	0	0	0	0	0	0	0	0	0	0	0	0	0	0	0	0	0	0	0	0	0	0	0	0	0	0	0
23112056|F|0-44:C>G-44:C>G	TGCAGAGTAGCAGACACAGAATGAAATCCCATACATTTCTCCCACGGCATGTTGTTCGTGTGCCCATAC	TGCAGAGTAGCAGACACAGAATGAAATCCCATACATTTCTCCCACGGCATGTTGTTCGTGTGCCCATAC	KN287777.1_scaffold-14245	45080	1	1.84E-28	44:C>G	44	0.986631	0.98645	0.111111	0.888889	0.01355	0.097561	0.026733	0.197531	0.112132	8.9978	4.6	1	0	0	0	0	0	0	0	0	0	0	0	0	0	0	0	0	0	0	0	0	0	0	0	0	0	0	0	0	0
23112061|F|0-5:A>T-5:A>T	TGCAGAGTAGGTGCTAGCGCAGCCATGGCTCACCCCTTCTCCTGCATGAGCGGTTCAGCAGGAATGCCG	TGCAGAGTAGGTGCTAGCGCAGCCATGGCTCACCCCTTCTCCTGCATG	KN293405.1_scaffold-22515	170708	1	4.65E-17	5:A>T	5	1	1	0.002674	0.997326	0	0.002674	0	0.005333	0.002667	10.9936	5	1	0	0	0	0	0	0	0	0	0	0	0	0	0	0	0	0	0	0	0	0	0	0	0	0	0	0	0	0	0
23112066|F|0-11:G>A-11:G>A	TGCAGAGTCAGGCTTCACTGTGTCCCCTCCCTGGTCAGGAAAGGAGGAGAGAGCCCTGTAAGTAAGGGT	TGCAGAGTCAGGCTTCACTGTGTCCCCTCCCTGGTCAGGAAAGGAGGAGAGAGCCCTGTAAGTAAGGGT	KN293742.1_scaffold-23015	20836	1	8.58E-27	11:G>A	11	0.973262	0.994505	0.016484	0.983516	0.005495	0.010989	0.010929	0.032424	0.021676	4.30425	1.75	1	0	0	0	-	0	0	0	0	0	0	0	0	0	0	0	0	0	0	0	0	0	0	0	0	0	0	0	0	0
23112070|F|0-55:G>T-55:G>T	TGCAGAGTCCATGTCCCAGCAGCATCCTGGGAGCTTTAAAAAGCAGCCGCAGCTGGGAACTGAAGAACA	TGCAGAGTCCATGTCCCAGCAGCATCCTGGGAGCTTTAAAAAGCAGCCGCAGCTGGGAACTGAAGAACA	KN277780.1_scaffold-0	196592	1	1.84E-28	55:G>T	55	1	1	0.008021	0.991979	0	0.008021	0	0.015914	0.007957	8.33404	4.4	1	0	0	0	0	0	0	0	0	0	0	0	0	0	0	0	0	0	0	0	0	0	0	0	0	0	0	0	0	0
23112071|F|0-31:A>C-31:A>C	TGCAGAGTCCCCTGGGATGTATGCGCAATACATGGGTCCTCTGGCTGCACAGCATCAGCACTGCATGAG	TGCAGAGTCCCCTGGGATGTATGCGCAATACATGGGTCCTCTGGCTGCACAGCATCAGCACTGCATGAG	KN281507.1_scaffold-5262	98569	1	2.38E-27	31:A>C	31	0.917112	0.994169	0.043732	0.956268	0.005831	0.037901	0.011594	0.083639	0.047616	4.37108	3.23529	1	0	-	0	-	0	0	0	0	0	0	0	0	0	0	0	0	0	0	0	0	0	0	0	0	0	-	-	-	0
23112075|F|0-25:C>G-25:C>G	TGCAGAGTCCTGCTGCTGTGATTCTCGACTGCAAATCCCAGATACCTTGGGGGGAGCAGGAAGAGGAAG	TGCAGAGTCCTGCTGCTGTGATTCTCGACTGCAAATCCCAGATACCTTGGGGGGAGCAGGAAGAGGAAG	KN283357.1_scaffold-7888	450358	1	1.84E-28	25:C>G	25	0.973262	0.994505	0.131868	0.868132	0.005495	0.126374	0.010929	0.228958	0.119943	5.12168	3.22034	1	0	0	0	0	0	0	0	0	2	0	0	0	0	0	0	0	0	0	0	0	0	2	2	2	-	0	0	0	0
23112085|F|0-8:G>A-8:G>A	TGCAGAGTGAGAAGGCTTTTATACAGTTCCCAAATGTGCTTGGAGGGTATGAGACACTCGCAGCATGAG	TGCAGAGTGAGAAGGCTTTTATACAGTTCCCAAATGTGCTTGGAGGGTATGAGACACTCGCAGCATGAG	KN281052.1_scaffold-4584	86245	1	2.38E-27	8:G>A	8	0.997326	0.9437	0.319035	0.680965	0.0563	0.262735	0.106261	0.434503	0.270382	8.64545	5.51389	1	0	0	0	2	0	2	0	0	0	0	0	2	2	2	0	0	0	0	0	0	0	0	0	0	0	0	0	2	2
23112092|F|0-22:G>A-22:G>A	TGCAGAGTGCATCAGAGTCAAGGGCTCCACTGCACCACGGCAACTGGGAGCAGAAGTCCCCAATCCCAC	TGCAGAGTGCATCAGAGTCAAGGGCTCCACTGCACCACGGCAACTGGGAGCAGAAGTCCCCAATCCCAC	KN279391.1_scaffold-2264	154696	1	1.84E-28	22:G>A	22	0.997326	1	0.002681	0.997319	0	0.002681	0	0.005348	0.002674	8.69444	3	1	0	0	0	0	0	0	0	0	0	0	0	0	0	0	0	0	0	0	0	0	0	0	0	0	0	0	0	0	0
23112094|F|0-9:C>T-9:C>T	TGCAGAGTGCGTGCGTGCGTGTGTGCTGTTCCTGGATGGAAGGAATAGTAAAGAAGTCAGAGGCTGGCA	TGCAGAGTGCGTGCGTGCGTGTGTGCTGTTCCTGGATGGAAGGAATAGTAAAGAAGTCAGAGGCTGGCA	KN290831.1_scaffold-18675	35805	3	1.84E-28	9:C>T	9	0.994652	1	0.005376	0.994624	0	0.005376	0	0.010695	0.005347	6.30043	2	1	0	0	0	0	0	0	0	0	0	0	0	0	0	0	0	0	0	0	0	0	0	0	0	0	0	0	0	0	0
23112097|F|0-21:T>G-21:T>G	TGCAGAGTGCTTCCCCCACCTTGCCAACACTAGCTGGGATGCTGGGCATGAGCGGTTCAGCAGGAATGC	TGCAGAGTGCTTCCCCCACCTTGCCAACACTAGCTGGGATGCTGGGCATG	JRXG01036625.1_scaffold-7067_1	13236	1	3.91E-18	21:T>G	21	0.991979	1	0.002695	0.997305	0	0.002695	0	0.005376	0.002688	9.71429	3	1	0	0	0	0	0	0	0	0	0	0	0	0	0	0	0	0	0	0	0	0	0	0	0	0	0	0	0	0	0
23112098|F|0-68:G>A-68:G>A	TGCAGAGTGCTTGTGGAGATGCTGTCTTTCTTGAGACTCGGTCTGTCCCATGGGTGGACAAGGGAGTCG	TGCAGAGTGCTTGTGGAGATGCTGTCTTTCTTGAGACTCGGTCTGTCCCATGGGTGGACAAGGGAGTCG	KN284869.1_scaffold-10055	239672	1	1.84E-28	68:G>A	68	0.989305	1	0.008108	0.991892	0	0.008108	0	0.016085	0.008042	5.85745	4.33333	1	0	0	0	0	0	0	0	0	0	0	0	0	0	0	0	0	0	0	0	0	0	0	0	0	0	0	0	0	0
23112110|F|0-66:T>C-66:T>C	TGCAGAGTTATTTTCACAGGCTGGTTTCATTAACTTTGAAATAAATCATAGCTCAGTGCTTCAGTATGT	TGCAGAGTTATTTTCACAGGCTGGTTTCATTAACTTTGAAATAAATCATAGCTCAGTGCTTCAGTATGT	KN292171.1_scaffold-20666	187446	1	1.84E-28	66:T>C	66	0.989305	1	0.048649	0.951351	0	0.048649	0	0.092564	0.046282	6.91793	4.5	1	0	0	0	0	0	0	0	0	0	0	0	0	0	0	0	0	0	0	0	0	0	0	0	0	0	0	2	0	2
23112116|F|0-58:T>C-58:T>C	TGCAGATAAACCACACTTTAAAAAGTACATGGAGAATTTAGAAAGGGTCCAGAGCCCTTTATAATAACA	TGCAGATAAACCACACTTTAAAAAGTACATGGAGAATTTAGAAAGGGTCCAGAGCCCTTTATAATAACA	KN293016.1_scaffold-21928	70949	1	1.84E-28	58:T>C	58	0.906417	0.9941	0.061947	0.938053	0.0059	0.056047	0.01173	0.116219	0.063974	3.38663	3.03571	1	0	0	-	-	0	0	0	0	0	0	0	0	0	-	0	0	0	0	0	0	-	0	0	-	0	0	0	0	0
23112118|F|0-7:A>C-7:A>C	TGCAGATAAAGAACGTCATCCCCAATATCCAACCCTCGGGTTGGCAGCTGTCCCGCAGGGCCTGGACTG	TGCAGATAAAGAACGTCATCCCCAATATCCAACCCTCGGGTTGGCAGCTGTCCCGCAGGGCCTGGACTG	KN293727.1_scaffold-22993	464260	1	1.84E-28	7:A>C	7	0.989305	1	0.005405	0.994595	0	0.005405	0	0.010752	0.005376	6.2013	4	1	0	0	0	0	0	0	0	0	0	0	0	0	0	0	0	0	0	0	0	0	0	0	0	0	0	0	0	0	0
23112120|F|0-40:A>G-40:A>G	TGCAGATAAGAATGAGTGATGATGCCCTAGATTTTAATGGAAATTTTAGAGTGCATGAGCGGTTCAGCA	TGCAGATAAGAATGAGTGATGATGCCCTAGATTTTAATGGAAATTTTAGAGTGCATG	KN282153.1_scaffold-6157	115250	1	6.23E-22	40:A>G	40	0.965241	1	0.00277	0.99723	0	0.00277	0	0.005525	0.002762	9.67699	3	1	0	0	0	0	0	0	-	0	0	0	0	0	0	0	0	0	0	0	0	0	0	0	0	0	0	0	0	0	0
23112144|F|0-18:G>A-18:G>A	TGCAGATACTGGAAACAGGAACCAGAAACAGTCACTTCCTCCCAGGTCAAACAGCCCAGCTGCTGAAGG	TGCAGATACTGGAAACAGGAACCAGAAACAGTCACTTCCTCCCAGGTCAAACAGCCCAGCTGCTGAAGG	KN278803.1_scaffold-1435	278109	1	1.84E-28	18:G>A	18	0.994652	0.994624	0.016129	0.983871	0.005376	0.010753	0.010695	0.031738	0.021216	6.96963	2.85714	1	0	0	0	0	0	0	0	0	0	0	0	0	0	0	0	0	0	0	0	0	0	0	0	0	0	0	0	0	0
23112146|F|0-43:C>G-43:C>G	TGCAGATAGAAAGAAACTGGGAAATTTTCAATTCCTTCCCTCTCTCTTCCTTTCTCTTTCCACTTTATA	TGCAGATAGAAAGAAACTGGGAAATTTTCAATTCCTTCCCTCTCTCTTCCTTTCTCTTTCCACTTTATA	KN283449.1_scaffold-8008	49997	1	1.84E-28	43:C>G	43	0.90107	1	0.008902	0.991098	0	0.008902	0	0.017646	0.008823	3.56627	1.66667	1	-	0	0	0	-	0	-	0	0	0	0	0	0	0	0	0	0	0	0	-	0	0	0	0	0	0	0	0	0
23112150|F|0-18:T>C-18:T>C	TGCAGATAGATAGAGCACTGTTTCCCAGTGAACCCTCTCCTCCCCCCAGAAATGAGCACTTGCTTAGCA	TGCAGATAGATAGAGCACTGTTTCCCAGTGAACCCTCTCCTCCCCCCAGAAATGAGCACTTGCTTAGCA	KN290053.1_scaffold-17552	166	1	1.84E-28	18:T>C	18	0.994652	1	0.008065	0.991935	0	0.008065	0	0.015999	0.007999	11.73876	4.33333	1	0	0	0	0	0	0	0	0	0	0	2	0	0	0	0	0	0	0	0	0	0	0	0	0	2	0	0	0	0
23112154|F|0-31:C>G-31:C>G	TGCAGATAGCATTGCTTTCTGTTTGCTGCGGCAGCCGTGTGAATGGCATGAGCGGTTCAGCAGGAATGC	TGCAGATAGCATTGCTTTCTGTTTGCTGCGGCAGCCGTGTGAATGGCATG	KN279665.1_scaffold-2682	503900	1	3.91E-18	31:C>G	31	0.991979	0.994609	0.043127	0.956873	0.005391	0.037736	0.010724	0.082534	0.046629	12.5413	7.25	1	0	0	0	0	0	0	0	0	0	0	0	0	0	0	0	0	0	0	0	0	0	0	0	0	0	0	0	0	0
23112155|F|0-7:A>C-7:A>C	TGCAGATAGCCTGTACATCTTTATTTCTCAGTGGAGAAATGAGGCATGAGCGGTTCAGCAGGAATGCCG	TGCAGATAGCCTGTACATCTTTATTTCTCAGTGGAGAAATGAGGCATG	KN293370.1_scaffold-22469	128589	1	4.65E-17	7:A>C	7	0.970588	1	0.002755	0.997245	0	0.002755	0	0.005494	0.002747	9.9256	3	1	0	0	0	0	0	0	0	0	0	0	0	0	0	0	0	0	0	0	0	0	0	0	0	0	0	0	0	0	0
23112158|F|0-20:C>T-20:C>T	TGCAGATAGCTGGGATGGGGCAGAAGCAGGGGGAGCACTTGGCTCTGCATGAGCGGTTCAGCAGGAATG	TGCAGATAGCTGGGATGGGGCAGAAGCAGGGGGAGCACTTGGCTCTGCATG	KN288801.1_scaffold-15705	153523	1	1.09E-18	20:C>T	20	0.997326	1	0.002681	0.997319	0	0.002681	0	0.005348	0.002674	9.46695	3	1	0	0	0	0	0	0	0	0	0	0	0	0	0	0	0	0	0	0	0	0	0	0	0	0	0	0	0	0	0
23112160|F|0-23:C>T-23:C>T	TGCAGATAGGGATTCCAATTGCTCAGACTTAACTGCTAAACATCCACCAGTGTATTTAAACACTTGCAT	TGCAGATAGGGATTCCAATTGCTCAGACTTAACTGCTAAACATCCACCAGTGTATTTAAACACTTGCAT	KN288716.1_scaffold-15590	264867	1	1.84E-28	23:C>T	23	0.962567	0.997222	0.025	0.975	0.002778	0.022222	0.00554	0.04875	0.027145	5.56637	3.09091	1	0	0	0	0	0	0	0	0	0	0	0	0	0	0	0	0	0	0	0	0	0	0	0	0	0	0	0	0	0
23112166|F|0-53:T>G-53:T>G	TGCAGATATCATCTCAGTCCTCATGCCAGAAGAAATTTCCTAGCCTCAAAAAATGTCTGCATGAGCGGT	TGCAGATATCATCTCAGTCCTCATGCCAGAAGAAATTTCCTAGCCTCAAAAAATGTCTGCATG	KN286398.1_scaffold-12263	111127	1	3.43E-25	53:T>G	53	0.975936	0.89863	0.441096	0.558904	0.10137	0.339726	0.182188	0.493061	0.337624	8.53041	7.13397	1	0	0	0	0	0	0	0	2	2	2	2	2	0	0	0	2	0	0	0	2	1	0	0	2	0	0	2	0	0
23112169|F|0-10:C>T-10:C>T	TGCAGATATGCTAGTGCGAATTCCTTCTTTTTATCCCTTGTCCAGGAAAAACTGATAAATACTGTTTCC	TGCAGATATGCTAGTGCGAATTCCTTCTTTTTATCCCTTGTCCAGGAAAAACTGATAAATACTGTTTCC	KN289301.1_scaffold-16422	106426	1	1.84E-28	10:C>T	10	0.946524	0.99435	0.014124	0.985876	0.00565	0.008475	0.011236	0.02785	0.019543	4.07745	4	1	0	0	0	0	0	0	0	0	0	0	0	0	0	1	0	0	0	0	0	0	0	0	0	-	-	0	0	0	0
23112179|F|0-32:C>T-32:C>T	TGCAGATCAGCACCTGGCTGCTCAGGTGGTGTCGCCAGCAGGGCCTGGGTTTGTTCCACCATGGGATGC	TGCAGATCAGCACCTGGCTGCTCAGGTGGTGTCGCCAGCAGGGCCTGGGTTTGTTCCACCATGGGATGC	KN288687.1_scaffold-15554	4215	1	1.84E-28	32:C>T	32	1	0.997326	0.042781	0.957219	0.002674	0.040107	0.005333	0.081901	0.043617	9.78678	5.82353	1	0	0	0	0	0	0	0	0	0	0	0	0	0	2	0	0	0	0	0	0	0	0	0	0	0	0	0	0	0
23112186|F|0-16:C>T-16:C>T	TGCAGATCATTTGCTCCATTCCCTTAATTTTCAAGGAAAACCACACTGTCCATGTCATTAAGAACTCAT	TGCAGATCATTTGCTCCATTCCCTTAATTTTCAAGGAAAACCACACTGTCCATGTCATTAAGAACTCAT	KN281282.1_scaffold-4939	59180	1	1.84E-28	16:C>T	16	0.994652	1	0.010753	0.989247	0	0.010753	0	0.021274	0.010637	9.00214	4.5	1	0	0	0	0	0	0	0	2	0	0	0	0	0	0	0	0	0	0	0	0	0	0	0	0	0	0	0	0	0
23112201|F|0-47:T>C-47:T>C	TGCAGATCCGGGAGGAGCCAGTCAAGGTTATTTTGCCTCAGGTGGCATGACTTGCATCACACCAAAGTG	TGCAGATCCGGGAGGAGCCAGTCAAGGTTATTTTGCCTCAGGTGGCATGACTTGCATCACACCAAAGTG	KN283435.1_scaffold-7990	32608	1	1.84E-28	47:T>C	47	0.997326	0.710456	0.656836	0.343164	0.289544	0.367292	0.411417	0.450805	0.431111	8.34234	6.88779	1	2	1	0	2	2	1	2	2	2	0	1	0	0	0	0	0	0	0	0	0	2	1	2	0	2	2	2	1	0
23110228|F|0-10:A>G-10:A>G	TGCAGATCTCAGACACAAAACCTTAAGTTCACACAGTTAAGAGCATGAGCGGTTCAGCAGGAATGCCGA	TGCAGATCTCAGACACAAAACCTTAAGTTCACACAGTTAAGAGCATG	KN281400.1_scaffold-5110	46722	1	1.60E-16	10:A>G	10	0.957219	1	0.002793	0.997207	0	0.002793	0	0.005571	0.002785	9.95516	3	1	0	0	0	0	0	0	0	0	0	0	0	0	0	0	0	0	0	0	0	0	0	-	-	0	0	0	0	0	0
23112216|F|0-61:T>C-61:T>C	TGCAGATCTGCAATTTGACTTACTGGGAACTTGAGGGGTTGCAAATTTCTAGACCAAGGTATTCAGAAG	TGCAGATCTGCAATTTGACTTACTGGGAACTTGAGGGGTTGCAAATTTCTAGACCAAGGTATTCAGAAG	KN286698.1_scaffold-12696	39293	1	1.84E-28	61:T>C	61	0.975936	1	0.00274	0.99726	0	0.00274	0	0.005464	0.002732	4.98031	3	1	0	0	-	0	0	0	-	0	0	0	0	0	0	0	0	0	0	0	0	0	0	0	0	0	0	0	0	0	0
23112217|F|0-66:T>C-66:T>C	TGCAGATCTGCTTATCTGCCCGGGTGAGACTGCGATTTTGTGGCTATATATAAACACACATCTCTATGT	TGCAGATCTGCTTATCTGCCCGGGTGAGACTGCGATTTTGTGGCTATATATAAACACACATCTCTATGT	KN282770.1_scaffold-7048	35197	1	8.58E-27	66:T>C	66	0.925134	0.040462	0.982659	0.017341	0.959538	0.023121	0.07765	0.034081	0.055866	2.93333	4.38278	1	-	1	1	1	1	1	1	-	1	1	1	1	1	1	1	1	1	1	1	1	1	1	-	-	1	1	1	1	1
23112235|F|0-53:A>T-53:A>T	TGCAGATGACACAAAAGGGAGTGGGAGTTGCAGACACCCTGGAAGGCAGGGCTAGGATGCAGAATGACC	TGCAGATGACACAAAAGGGAGTGGGAGTTGCAGACACCCTGGAAGGCAGGGCTAGGATGCAGAATGACC	KN280852.1_scaffold-4321	37992	1	1.84E-28	53:A>T	53	0.983957	0.991848	0.048913	0.951087	0.008152	0.040761	0.016171	0.093041	0.054606	8.77293	4	1	0	0	0	0	0	0	0	0	0	0	0	0	0	0	0	0	2	2	0	0	0	0	0	0	0	0	0	0	0
23112245|F|0-9:G>A-9:G>A	TGCAGATGAGTAAGGTGGCACAAGGTCATTGTCCCTATTTTACAGATGCATGAGCGGTTCAGCAGGAAT	TGCAGATGAGTAAGGTGGCACAAGGTCATTGTCCCTATTTTACAGATGCATG	KN284159.1_scaffold-9028	340562	1	3.14E-19	9:G>A	9	0.986631	1	0.02439	0.97561	0	0.02439	0	0.047591	0.023795	10.88312	6.63636	1	0	0	0	0	2	0	0	0	0	0	0	0	2	2	0	0	0	0	0	0	0	0	0	0	0	0	0	0	0
23112272|F|0-35:G>A-35:G>A	TGCAGATGCTCTTTCTCCCGTGGCTGCTGCGTGGCGTCGCGGTGGCCCCGTGTAAGGCTTCTTGTACGT	TGCAGATGCTCTTTCTCCCGTGGCTGCTGCGTGGCGTCGCGGTGGCCCCGTGTAAGGCTTCTTGTACGT	KN278263.1_scaffold-662	110299	1	1.84E-28	35:G>A	35	1	1	0.010695	0.989305	0	0.010695	0	0.021162	0.010581	8.08085	3	1	0	0	0	0	0	0	0	0	0	0	0	0	0	0	0	0	0	0	0	0	0	0	0	0	0	0	0	0	0
23112279|F|0-25:G>A-25:G>A	TGCAGATGCTGTTGAGGTCCGGACTGCATGTGGTGGCCCCAGGCAACTGCCATCGGCTGGGGAAGGAGG	TGCAGATGCTGTTGAGGTCCGGACTGCATGTGGTGGCCCCAGGCAACTGCCATCGGCTGGGGAAGGAGG	KN287805.1_scaffold-14286	55090	1	8.58E-27	25:G>A	25	0.997326	0.895442	0.482574	0.517426	0.104558	0.378016	0.187251	0.499393	0.343322	6.7346	5.03947	1	2	2	2	0	1	2	1	2	2	0	2	2	0	0	0	2	0	2	1	0	1	1	2	1	2	0	0	2	0
23112289|F|0-23:T>G-23:T>G	TGCAGATGGCCAGCCCTTCTCCTTTCTTGACTGTCTAGGATTCAGGCGGCTCATGACATTTGTGGCCTC	TGCAGATGGCCAGCCCTTCTCCTTTCTTGACTGTCTAGGATTCAGGCGGCTCATGACATTTGTGGCCTC	KN282447.1_scaffold-6566	172428	1	1.84E-28	23:T>G	23	0.997326	1	0.002681	0.997319	0	0.002681	0	0.005348	0.002674	7.13919	3	1	0	0	0	0	0	0	0	0	0	0	0	0	0	0	0	0	0	0	0	0	0	0	0	0	0	0	0	0	0
23112293|F|0-35:G>A-35:G>A	TGCAGATGGCTGCTCTGAGCTCCATGGAGTCTGGCGTGGCTCCTTGCCAGAGGCAGATGCATGAGCGGT	TGCAGATGGCTGCTCTGAGCTCCATGGAGTCTGGCGTGGCTCCTTGCCAGAGGCAGATGCATG	KN285681.1_scaffold-11195	69603	1	3.43E-25	35:G>A	35	1	1	0.010695	0.989305	0	0.010695	0	0.021162	0.010581	12.2	5	1	0	0	0	0	0	0	0	0	0	0	0	0	0	0	0	0	0	0	0	0	0	0	0	0	0	0	0	0	0
23112299|F|0-20:C>T-20:C>T	TGCAGATGGGTCAGCGGTCCCTGCCAGACGTGAAACAGGGTGCAGTTCAGCCCTGTCTGATGCATGAGC	TGCAGATGGGTCAGCGGTCCCTGCCAGACGTGAAACAGGGTGCAGTTCAGCCCTGTCTGATGCATGAGC	KN280199.1_scaffold-3433	52652	1	8.58E-27	20:C>T	20	1	1	0.002674	0.997326	0	0.002674	0	0.005333	0.002667	13.8234	5	1	0	0	0	0	0	0	0	0	0	0	0	0	0	0	0	0	0	0	0	0	0	0	0	0	0	0	0	0	0
23112302|F|0-5:A>T-5:A>T	TGCAGATGGGTTTATGGCACTGCAAACCTCATGTGCATGAGCGGTTCAGCAGGAATGCCGAGACCGATC	TGCAGATGGGTTTATGGCACTGCAAACCTCATGTGCATG	KN283697.1_scaffold-8373	12895	1	2.85E-12	5:A>T	5	0.994652	0.946237	0.365591	0.634409	0.053763	0.311828	0.101746	0.463869	0.282807	10.98646	8.41818	1	0	2	2	2	0	2	0	0	2	0	2	0	2	2	0	0	1	2	2	2	2	0	0	2	2	2	2	0	2
23112314|F|0-47:C>T-47:C>T	TGCAGATGTCAGAGGTGAAGTGCAAGGCTACCTGTGGCCCTGCCTTACGCAGCTCCTCTCTCAAGTACT	TGCAGATGTCAGAGGTGAAGTGCAAGGCTACCTGTGGCCCTGCCTTACGCAGCTCCTCTCTCAAGTACT	KN280804.1_scaffold-4248	40378	12	1.84E-28	47:C>T	47	0.997326	1	0.018767	0.981233	0	0.018767	0	0.036829	0.018415	7.19785	3.5	1	0	0	0	0	0	0	0	0	0	0	0	0	0	0	0	0	0	0	0	0	0	0	0	0	0	0	0	0	0
23119321|F|0-65:G>A-65:G>A	TGCAGATGTCTCTCCCTCCTGTCCTCCACAGATTGCCTTCTCTCCATTCAGTTTCTCCCCACATGGCTC	TGCAGATGTCTCTCCCTCCTGTCCTCCACAGATTGCCTTCTCTCCATTCAGTTTCTCCCCACATGGCTC	KN278771.1_scaffold-1388	545	1	1.84E-28	65:G>A	65	0.994652	0.997312	0.08871	0.91129	0.002688	0.086022	0.005362	0.161681	0.083521	10.30901	4.85714	1	0	0	0	0	0	0	0	0	2	0	0	0	0	0	0	0	0	0	0	0	0	0	0	0	0	0	0	0	0
23111300|F|0-6:T>A-6:T>A	TGCAGATGTGCTCACCCAGCAAGCCACGTTAAGGTGCCTTAAGGCATGAGCGGTTCAGCAGGAATGCCG	TGCAGATGTGCTCACCCAGCAAGCCACGTTAAGGTGCCTTAAGGCATG	KN283254.1_scaffold-7742	24286	1	4.65E-17	6:T>A	6	1	0.959893	0.427807	0.572193	0.040107	0.387701	0.076997	0.489576	0.283287	11.27313	6.47938	1	0	0	2	2	2	0	0	0	0	0	2	2	0	0	2	0	0	0	0	0	0	0	0	0	0	2	2	2	0
23112324|F|0-29:A>C-29:A>C	TGCAGATGTGGGAACTCTTTGGGTTCCCAAATCTCTGGCAGATGGAGCATGAGCGGTTCAGCAGGAATG	TGCAGATGTGGGAACTCTTTGGGTTCCCAAATCTCTGGCAGATGGAGCATG	KN290725.1_scaffold-18533	232584	1	5.06E-17	29:A>C	29	0.997326	0.935657	0.351206	0.648794	0.064343	0.286863	0.120406	0.455721	0.288064	11.60455	7.47273	1	2	2	0	0	2	0	0	1	0	0	0	0	0	2	0	0	2	2	2	2	2	0	0	1	1	0	2	0	2
23112328|F|0-23:A>G-23:A>G	TGCAGATGTGTAGAAGGGTCCCAAGGCACTGCCTTCTCCCTTATATGCCTCATTCTGATCCCTAAGGTC	TGCAGATGTGTAGAAGGGTCCCAAGGCACTGCCTTCTCCCTTATATGCCTCATTCTGATCCCTAAGGTC	KN279758.1_scaffold-2808	36157	1	1.84E-28	23:A>G	23	0.986631	0.98645	0.081301	0.918699	0.01355	0.067751	0.026733	0.149382	0.088058	6.4978	3.94872	1	0	0	0	2	2	0	0	0	0	0	0	0	0	0	2	0	0	0	0	0	-	0	0	0	0	0	0	0	0
23112330|F|0-13:C>T-13:C>T	TGCAGATGTGTGGCGGGGGGTGCATGGCATGGGGAATGGCCAAGGTGTGAGGAGTGCCCGCCAGCTGCA	TGCAGATGTGTGGCGGGGGGTGCATGGCATGGGGAATGGCCAAGGTGTGAGGAGTGCCCGCCAGCTGCA	KN278670.1_scaffold-1256	41336	1	1.84E-28	13:C>T	13	0.97861	1	0.008197	0.991803	0	0.008197	0	0.016259	0.00813	5.0655	1.66667	1	0	0	0	0	0	0	0	0	0	0	0	0	0	0	0	0	0	0	0	0	0	0	0	0	0	0	0	0	0
23112336|F|0-41:C>A-41:C>A	TGCAGATTAGAGAGCAGGGGGCAGCACAGTTGCAGTGGTGACTGTCATGGGGGGCAAAATGGATTCAAT	TGCAGATTAGAGAGCAGGGGGCAGCACAGTTGCAGTGGTGACTGTCATGGGGGGCAAAATGGATTCAAT	KN293705.1_scaffold-22967	329979	1	1.84E-28	41:C>A	41	1	0.997326	0.096257	0.903743	0.002674	0.093583	0.005333	0.173983	0.089658	9.59701	6.26087	1	0	0	2	0	0	0	0	0	0	0	0	0	0	0	0	0	0	0	0	0	0	0	0	0	2	0	0	0	2
23112339|F|0-15:C>T-15:C>T	TGCAGATTCAATGCTCCCCAAAAATTCACATAGTTGTTACCCTAACAGTTACACATGCATGAGCGGTTC	TGCAGATTCAATGCTCCCCAAAAATTCACATAGTTGTTACCCTAACAGTTACACATGCATG	KN282900.1_scaffold-7225	5882	1	4.20E-24	15:C>T	15	0.986631	1	0.02439	0.97561	0	0.02439	0	0.047591	0.023795	9.65659	3.11111	1	0	0	0	0	0	0	0	0	0	0	0	0	0	0	0	0	0	0	0	0	0	0	0	0	0	0	0	0	0
23112341|F|0-60:C>T-60:C>T	TGCAGATTCAGACTTCCTACCCTGCTGCCCTCCTCATAGGCCTCCACAGCTGGTGTGATCCAGCACTGC	TGCAGATTCAGACTTCCTACCCTGCTGCCCTCCTCATAGGCCTCCACAGCTGGTGTGATCCAGCACTGC	KN290591.1_scaffold-18345	68868	1	1.84E-28	60:C>T	60	1	0.967914	0.237968	0.762032	0.032086	0.205882	0.062112	0.362678	0.212395	12.37225	7.44167	1	0	2	0	2	0	0	0	0	0	2	2	0	0	0	0	0	2	1	1	1	2	2	1	2	0	2	0	0	0
23112349|F|0-18:G>T-18:G>T	TGCAGATTCTGCCAGCAGGTCCCATCCCATCAGGCAGCTGGGCATGAGCGGTTCAGCAGGAATGCCGAG	TGCAGATTCTGCCAGCAGGTCCCATCCCATCAGGCAGCTGGGCATG	KN283874.1_scaffold-8622	72192	1	5.50E-16	18:G>T	18	0.994652	0.989247	0.110215	0.889785	0.010753	0.099462	0.021274	0.196135	0.108705	10.45356	5.73077	1	0	0	0	0	2	0	0	0	0	0	0	0	0	0	0	0	0	0	0	0	2	0	0	0	0	0	0	0	1
23112352|F|0-55:C>T-55:C>T	TGCAGATTGAGGCCATTGCTCCTAATCCTGTCCCCTACAGCCACAGAATTCTCAACGCTCCTACAATAA	TGCAGATTGAGGCCATTGCTCCTAATCCTGTCCCCTACAGCCACAGAATTCTCAACGCTCCTACAATAA	KN286152.1_scaffold-11884	455577	1	1.84E-28	55:C>T	55	0.946524	1	0.002825	0.997175	0	0.002825	0	0.005634	0.002817	4.42166	3	1	0	0	0	0	0	0	0	0	0	0	0	0	0	0	0	0	0	0	0	0	-	0	-	-	0	0	0	0	0
23112354|F|0-58:A>G-58:A>G	TGCAGATTGCACCCCCCAACACATCTCTACAGTCCATCCCAGTGGGTAAATTGGAGATAAGTATTTGAA	TGCAGATTGCACCCCCCAACACATCTCTACAGTCCATCCCAGTGGGTAAATTGGAGATAAGTATTTGAA	KN284019.1_scaffold-8827	97776	1	1.84E-28	58:A>G	58	1	1	0.005348	0.994652	0	0.005348	0	0.010638	0.005319	8.19149	3.5	1	0	2	0	0	0	0	0	0	0	0	0	0	0	0	0	0	0	0	0	0	0	0	0	0	0	0	0	0	0
23112356|F|0-37:A>G-37:A>G	TGCAGATTGCTCAGGGCAAGCAGCGGCACCAGGACTCAGAGGGGTGGCCATAGCCCTCCAAGACTCCCC	TGCAGATTGCTCAGGGCAAGCAGCGGCACCAGGACTCAGAGGGGTGGCCATAGCCCTCCAAGACTCCCC	KN284553.1_scaffold-9596	171854	1	1.84E-28	37:A>G	37	1	0.973262	0.184492	0.815508	0.026738	0.157754	0.052046	0.300909	0.176478	9.75658	5.96471	1	0	0	0	0	0	2	0	0	0	0	0	0	0	0	0	0	0	0	0	0	0	0	0	0	0	0	0	2	0
23112357|F|0-9:C>T-9:C>T	TGCAGATTGCTGGGCATATCTAAATAGGCAATTAACACACAGCAATCGACTCCGATGTATATCACACCA	TGCAGATTGCTGGGCATATCTAAATAGGCAATTAACACACAGCAATCGACTCCGATGTATATCACACCA	KN280751.1_scaffold-4172	71455	1	1.84E-28	9:C>T	9	1	1	0.018717	0.981283	0	0.018717	0	0.036733	0.018366	6.04691	4.375	1	0	0	0	0	0	0	0	0	0	0	0	0	0	0	0	0	0	0	0	0	0	0	0	0	0	0	0	0	0
23112364|F|0-8:G>A-8:G>A	TGCAGATTGTCCAACAGCTTGTTGTCAGAGCGCTGTAGGATGGCTCTTGCATGAGCGGTTCAGCAGGAA	TGCAGATTGTCCAACAGCTTGTTGTCAGAGCGCTGTAGGATGGCTCTTGCATG	KN291190.1_scaffold-19238	24226	1	9.08E-20	8:G>A	8	1	1	0.005348	0.994652	0	0.005348	0	0.010638	0.005319	9.81876	2	1	0	0	0	0	0	0	0	0	0	0	0	0	0	0	0	0	0	0	0	0	0	0	0	0	0	0	0	0	0
23112372|F|0-13:G>C-13:G>C	TGCAGATTTCACAGAAGCAGTGGCTGGGGCAGGCTCCTGTTTAATAATGATGTCTGGAAGCCCAGTGAG	TGCAGATTTCACAGAAGCAGTGGCTGGGGCAGGCTCCTGTTTAATAATGATGTCTGGAAGCCCAGTGAG	KN284719.1_scaffold-9839	244190	1	1.84E-28	13:G>C	13	0.986631	1	0.03794	0.96206	0	0.03794	0	0.073002	0.036501	7.07576	3.1875	1	0	0	0	0	0	2	0	0	2	0	0	0	0	0	0	0	0	0	0	0	0	0	0	0	0	0	0	0	0
23112376|F|0-35:G>A-35:G>A	TGCAGATTTCTGGATAACTGTGTTTTTGTGACTTCGATGCACTTATGCATGAGCGGTTCAGCAGGAATG	TGCAGATTTCTGGATAACTGTGTTTTTGTGACTTCGATGCACTTATGCATG	KN292898.1_scaffold-21744	52633	1	1.09E-18	35:G>A	35	0.997326	1	0.010724	0.989276	0	0.010724	0	0.021218	0.010609	13.86966	6	1	0	0	0	0	0	0	0	0	0	2	0	0	0	0	0	0	0	0	0	0	0	0	0	0	0	0	0	0	0
23110238|F|0-31:T>C-31:T>C	TGCAGATTTGTAGAAAGGGGAGCCCTGGGTGTGTTGGGGTGCATGAGCGGTTCAGCAGGAATGCCGAGA	TGCAGATTTGTAGAAAGGGGAGCCCTGGGTGTGTTGGGGTGCATG	KN291762.1_scaffold-20062	348383	1	2.44E-14	31:T>C	31	0.649733	0.946502	0.111111	0.888889	0.053498	0.057613	0.101272	0.197531	0.149401	7.21724	6.45455	1	0	-	0	0	0	0	0	0	0	0	-	0	-	0	2	-	0	0	0	2	0	0	1	1	0	-	0	0	0
23112387|F|0-6:T>A-6:T>A	TGCAGATTTTCCCAGGGTGATTGGTGATATGCAGCTATTGTGTATTCAGTTCCATGAGCATGAGCGGTT	TGCAGATTTTCCCAGGGTGATTGGTGATATGCAGCTATTGTGTATTCAGTTCCATGAGCATG	KN280715.1_scaffold-4127	111077	4	1.20E-24	6:T>A	6	0.989305	0.994595	0.132432	0.867568	0.005405	0.127027	0.010752	0.229788	0.12027	8.38428	4.64407	1	0	0	0	0	0	0	0	0	0	0	0	0	0	0	0	0	0	0	0	2	2	0	0	0	0	0	0	0	0
23112388|F|0-65:C>A-65:C>A	TGCAGATTTTCTGACATTGAAATCTTCCAATGTCAAAAAACCCTGCTGCGCTGCAAACTAGCAGCCTGG	TGCAGATTTTCTGACATTGAAATCTTCCAATGTCAAAAAACCCTGCTGCGCTGCAAACTAGCAGCCTGG	KN277979.1_scaffold-277	938149	1	1.84E-28	65:C>A	65	0.997326	0.989276	0.101877	0.898123	0.010724	0.091153	0.021218	0.182996	0.102107	6.43939	4.04255	1	0	0	0	0	0	2	0	0	0	0	0	0	0	0	0	0	0	0	0	0	0	0	0	0	0	0	0	2	0
23112389|F|0-20:C>A-20:C>A	TGCAGATTTTGAAAAGTGAGCTATGATTTGGCCAAGCAAATCAGCATGAGCGGTTCAGCAGGAATGCCG	TGCAGATTTTGAAAAGTGAGCTATGATTTGGCCAAGCAAATCAGCATG	KN283482.1_scaffold-8054	70023	1	4.65E-17	20:C>A	20	0.983957	1	0.002717	0.997283	0	0.002717	0	0.00542	0.00271	10.34348	3	1	0	0	0	0	0	0	0	0	0	0	0	0	0	0	0	0	0	0	0	0	0	0	0	0	0	0	0	0	0
23112394|F|0-38:C>G-38:C>G	TGCAGCAAAAGCAGCATGGAGCTGGCTCTCCCACTACTCTGCCTGCTTGGGTGGGGGCATGAGCGGTTC	TGCAGCAAAAGCAGCATGGAGCTGGCTCTCCCACTACTCTGCCTGCTTGGGTGGGGGCATG	KN278751.1_scaffold-1362	34338	1	4.20E-24	38:C>G	38	0.983957	1	0.008152	0.991848	0	0.008152	0	0.016171	0.008086	6.11739	4.33333	1	0	0	0	0	0	0	0	0	0	2	0	0	0	0	0	0	0	0	0	0	0	0	0	0	0	0	0	0	0
23112396|F|0-66:G>A-66:G>A	TGCAGCAAAAGGCATGACTTAAGATGCCTAAATCCGGGAAGGGGTTCTGCATGTGTGCACATGCACGCA	TGCAGCAAAAGGCATGACTTAAGATGCCTAAATCCGGGAAGGGGTTCTGCATGTGTGCACATGCACGCA	KN278606.1_scaffold-1168	274495	1	1.84E-28	66:G>A	66	0.997326	0.994638	0.058981	0.941019	0.005362	0.053619	0.010666	0.111005	0.060836	7.51398	3.76	1	0	0	0	0	0	0	0	0	0	0	0	0	0	0	0	0	0	0	0	0	0	0	0	0	0	0	0	0	0
23112413|F|0-40:C>G-40:C>G	TGCAGCAAAGCTAGAGTGTTCTAATTGAAATGTATCAGATCATGTGTAGAGGCATGAGCGGTTCAGCAG	TGCAGCAAAGCTAGAGTGTTCTAATTGAAATGTATCAGATCATGTGTAGAGGCATG	KN279557.1_scaffold-2513	1140948	1	2.17E-21	40:C>G	40	0.951872	0.991573	0.025281	0.974719	0.008427	0.016854	0.016712	0.049284	0.032998	8.30926	4.27273	1	0	0	0	0	0	0	0	0	0	0	0	0	0	0	0	0	0	0	0	0	0	0	0	0	0	0	0	0	0
23112416|F|0-41:C>T-41:C>T	TGCAGCAAAGGCTACTGAGAGAAATTCCACACCTGGTGACCCGGGTTGGACTACATCTTCCTATCAGTC	TGCAGCAAAGGCTACTGAGAGAAATTCCACACCTGGTGACCCGGGTTGGACTACATCTTCCTATCAGTC	KN283780.1_scaffold-8489	46686	1	1.84E-28	41:C>T	41	0.989305	0.997297	0.024324	0.975676	0.002703	0.021622	0.005391	0.047465	0.026428	7.44181	3.72727	1	0	0	0	0	0	0	0	0	0	0	0	0	0	0	0	0	0	0	0	0	0	0	0	0	0	0	0	0	0
23112421|F|0-66:A>G-66:A>G	TGCAGCAAATGCAATCAGTGTTTTATCTACACTGAAGATATTTAGCCAGCGTTGCCCACATTTGGAATC	TGCAGCAAATGCAATCAGTGTTTTATCTACACTGAAGATATTTAGCCAGCGTTGCCCACATTTGGAATC	KN291311.1_scaffold-19418	104409	1	8.58E-27	66:A>G	66	0.973262	0.002747	1	0	0.997253	0.002747	0.005479	0	0.00274	9	6.58297	1	1	1	1	1	1	1	1	1	1	1	1	1	1	1	1	1	1	1	1	1	1	1	1	-	1	1	1	1	1
23112427|F|0-33:A>G-33:A>G	TGCAGCAACAAGAGGTGAGTACTCAGGGCACTCATGGCCTGTGCAGGTGCATGAGCGGTTCAGCAGGAA	TGCAGCAACAAGAGGTGAGTACTCAGGGCACTCATGGCCTGTGCAGGTGCATG	KN279345.1_scaffold-2197	173779	1	9.08E-20	33:A>G	33	1	1	0.010695	0.989305	0	0.010695	0	0.021162	0.010581	9.59615	6.25	1	0	0	0	0	0	0	0	2	0	0	0	0	0	0	0	0	0	0	0	0	0	0	0	0	0	0	0	0	0
23112429|F|0-8:C>G-8:C>G	TGCAGCAACACATGTCCCAGTGGTGGGGGACTGGTCAGGGGCATGAGCGGTTCAGCAGGAATGCCGAGA	TGCAGCAACACATGTCCCAGTGGTGGGGGACTGGTCAGGGGCATG	KN284340.1_scaffold-9296	83422	1	1.88E-15	8:C>G	8	0.986631	0.99729	0.04878	0.95122	0.00271	0.04607	0.005405	0.092802	0.049104	7.9386	5.28571	1	0	0	0	0	0	0	0	0	0	0	0	0	0	0	0	0	0	0	0	0	0	0	0	0	0	0	0	2	0
23112432|F|0-18:T>C-18:T>C	TGCAGCAACAGAGTGCAGTCTGAGTTACAGAGTATTTTTCTGGAGGGATGGGCAAGGCAAAAGTGGAGC	TGCAGCAACAGAGTGCAGTCTGAGTTACAGAGTATTTTTCTGGAGGGATGGGCAAGGCAAAAGTGGAGC	KN284865.1_scaffold-10048	82840	1	1.84E-28	18:T>C	18	0.997326	1	0.016086	0.983914	0	0.016086	0	0.031654	0.015827	9.35332	3.42857	1	0	0	0	0	0	0	0	0	0	0	0	0	0	0	2	0	0	0	0	0	0	0	0	0	0	0	0	0	0
23112443|F|0-18:C>A-18:C>A	TGCAGCAACCTGCCCAGACCCTGCTACTGGCATCTGGTACCACATTGCTGTGTGCCAGCCTGTCCCATG	TGCAGCAACCTGCCCAGACCCTGCTACTGGCATCTGGTACCACATTGCTGTGTGCCAGCCTGTCCCATG	KN287800.1_scaffold-14276	20720	1	1.84E-28	18:C>A	18	0.973262	0.997253	0.002747	0.997253	0.002747	0	0.005479	0.005479	0.005479	5.00901	4	1	0	0	0	0	0	0	0	0	0	0	0	0	0	0	0	0	0	0	0	0	0	0	0	0	0	-	0	0	0
23112456|F|0-50:A>G-50:A>G	TGCAGCAAGAAAGAAAAGGTGTTTGTCCTCTTCCATATAGCAGCCCTTCAAGTACTTGAAGACTGCTAT	TGCAGCAAGAAAGAAAAGGTGTTTGTCCTCTTCCATATAGCAGCCCTTCAAGTACTTGAAGACTGCTAT	KN293016.1_scaffold-21928	70792	10	1.84E-28	50:A>G	50	0.957219	0.997207	0.002793	0.997207	0.002793	0	0.005571	0.005571	0.005571	4.1851	3	1	0	0	0	0	0	0	0	0	0	0	0	0	0	0	0	0	0	0	-	0	0	0	0	-	0	0	0	0	0
23112457|F|0-30:T>A-30:T>A	TGCAGCAAGAAGAGAGTGGGGAGAGAAGCCTTGTTGAGTCTAGGGTGCCCCATCCTCTGGAGCAGGACC	TGCAGCAAGAAGAGAGTGGGGAGAGAAGCCTTGTTGAGTCTAGGGTGCCCCATCCTCTGGAGCAGGACC	KN287779.1_scaffold-14247	444200	1	1.84E-28	30:T>A	30	1	0.997326	0.037433	0.962567	0.002674	0.034759	0.005333	0.072064	0.038699	7.17597	3.8125	1	0	0	0	0	0	0	0	0	0	0	0	0	0	0	0	0	0	0	0	0	0	0	0	0	0	0	0	0	0
23112463|F|0-8:G>A-8:G>A	TGCAGCAAGAGGTGCACCAAGTTCCCGAGCCGTGGTGGGGCCAGCATTCCCATCAGTAGCATGAGCGGT	TGCAGCAAGAGGTGCACCAAGTTCCCGAGCCGTGGTGGGGCCAGCATTCCCATCAGTAGCATG	KN287018.1_scaffold-13159	32069	1	3.43E-25	8:G>A	8	1	0.991979	0.144385	0.855615	0.008021	0.136364	0.015914	0.247076	0.131495	11.80043	6.30769	1	0	0	0	0	0	0	0	0	0	0	0	0	0	0	0	0	0	0	0	0	0	0	0	0	0	0	0	0	0
23112466|F|0-23:T>A-23:T>A	TGCAGCAAGATGCAGGGAGATGTTGGGCTCCCAGGCCAGCTGTGGCAGGCAGCCAGGAGACCGCACAGG	TGCAGCAAGATGCAGGGAGATGTTGGGCTCCCAGGCCAGCTGTGGCAGGCAGCCAGGAGACCGCACAGG	KN282904.1_scaffold-7231	94065	1	1.84E-28	23:T>A	23	0.975936	1	0.00274	0.99726	0	0.00274	0	0.005464	0.002732	6.48678	3	1	0	0	0	0	0	0	0	0	0	0	0	0	0	0	0	0	0	0	0	0	0	0	0	0	0	0	0	0	0
23112469|F|0-5:C>G-5:C>G	TGCAGCAAGCAGCCTGCTTCTGCCTCACATGCAAATCTGGGGAGGCACTTGCCCCCCATATGTCCCCTG	TGCAGCAAGCAGCCTGCTTCTGCCTCACATGCAAATCTGGGGAGGCACTTGCCCCCCATATGTCCCCTG	KN293802.1_scaffold-23102	98997	1	1.84E-28	5:C>G	5	1	0.796791	0.614973	0.385027	0.203209	0.411765	0.32383	0.473562	0.398696	7.31733	6.62807	1	2	1	2	2	1	2	1	1	2	2	2	1	1	1	1	0	1	1	2	1	1	1	1	0	1	2	2	0	0
23112470|F|0-13:G>A-13:G>A	TGCAGCAAGCAGCGGAGCAGAGGCACCGTACTGGGCCACACTGTACCTTTGCATGAGCGGTTCAGCAGG	TGCAGCAAGCAGCGGAGCAGAGGCACCGTACTGGGCCACACTGTACCTTTGCATG	KN281951.1_scaffold-5879	133755	1	7.54E-21	13:G>A	13	0.965241	0.966759	0.249307	0.750693	0.033241	0.216066	0.064272	0.374307	0.219289	5.49652	4.18421	1	2	2	1	0	2	2	0	2	0	0	0	0	2	0	0	0	0	0	0	0	1	2	2	0	0	2	0	0	0
23112471|F|0-11:G>C-11:G>C	TGCAGCAAGCAGGCTGAAAACAGCTGCGCTGGGCTCCACAGCTTCTGCATCAGCTCCATGCTGGCAGCA	TGCAGCAAGCAGGCTGAAAACAGCTGCGCTGGGCTCCACAGCTTCTGCATCAGCTCCATGCTGGCAGCA	KN292425.1_scaffold-21051	64523	2	1.84E-28	11:G>C	11	1	1	0.002674	0.997326	0	0.002674	0	0.005333	0.002667	8.1349	3	1	0	0	0	0	0	0	0	0	0	0	0	0	0	0	0	0	0	0	0	0	0	0	0	0	0	0	0	0	0
23112476|F|0-21:C>T-21:C>T	TGCAGCAAGCTGCTCTCCATGCGTCCGGGCTGTGTTCTGGACTATGTGCATGAGCGGTTCAGCAGGAAT	TGCAGCAAGCTGCTCTCCATGCGTCCGGGCTGTGTTCTGGACTATGTGCATG	KN286307.1_scaffold-12117	41766	1	3.14E-19	21:C>T	21	1	1	0.008021	0.991979	0	0.008021	0	0.015914	0.007957	13.23454	9	1	0	0	0	0	0	0	0	0	0	0	0	0	0	0	0	0	0	0	0	0	0	0	0	0	0	0	0	0	0
23112486|F|0-22:G>C-22:G>C	TGCAGCAAGGCGGCAGGAGCGGGGGGGCACATGCACACAGACATGAGCAGCCACAGCATGAGCGGTTCA	TGCAGCAAGGCGGCAGGAGCGGGGGGGCACATGCACACAGACATGAGCAGCCACAGCATG	KN292516.1_scaffold-21169	90410	1	1.47E-23	22:G>C	22	0.997326	1	0.002681	0.997319	0	0.002681	0	0.005348	0.002674	8.18455	3	1	0	0	0	0	0	0	0	0	0	0	2	0	0	0	0	0	0	0	0	0	0	0	0	0	0	0	0	0	0
23112490|F|0-31:C>T-31:C>T	TGCAGCAAGGGCTCTCTAAACTTCTAAAGGCCAGATCCAGGTTAGACTAAGAGGTGCCTACATCAGGTG	TGCAGCAAGGGCTCTCTAAACTTCTAAAGGCCAGATCCAGGTTAGACTAAGAGGTGCCTACATCAGGTG	KN290306.1_scaffold-17921	102092	1	1.84E-28	31:C>T	31	0.97861	0.989071	0.098361	0.901639	0.010929	0.087432	0.021619	0.177372	0.099495	5.97339	3.71429	1	0	0	0	0	2	0	0	0	2	0	0	0	0	0	0	0	0	0	2	0	0	2	0	0	0	0	0	0	0
23112513|F|0-39:T>C-39:T>C	TGCAGCAATCTGGATCAACAAGCCCCAGCCACTCAGTAGTTGCTTGCAAGATCTCCATCTCAGGCATGA	TGCAGCAATCTGGATCAACAAGCCCCAGCCACTCAGTAGTTGCTTGCAAGATCTCCATCTCAGGCATGA	KN282537.1_scaffold-6688	344057	1	6.63E-28	39:T>C	39	0.983957	1	0.076087	0.923913	0	0.076087	0	0.140595	0.070298	6.9628	4.22581	1	0	0	2	2	0	0	0	0	0	0	0	0	0	2	0	0	0	0	0	0	0	0	0	0	0	0	0	0	0
23112514|F|0-21:C>G-21:C>G	TGCAGCAATGCAAGCACATGCCTGCATTTGCTCAGGCCAGGAGCTGAGTGGTGCTAAAGCATGAGCGGT	TGCAGCAATGCAAGCACATGCCTGCATTTGCTCAGGCCAGGAGCTGAGTGGTGCTAAAGCATG	KN279435.1_scaffold-2320	294917	1	3.43E-25	21:C>G	21	0.986631	1	0.00271	0.99729	0	0.00271	0	0.005405	0.002703	7.75162	3	1	0	0	0	0	0	0	0	0	0	0	0	0	0	0	0	0	0	0	0	0	0	0	0	0	0	0	0	0	0
23112528|F|0-12:A>C-12:A>C	TGCAGCACAAACATGTGCACAAGTGCCCATAGTGAAGACATGCATGAGCGGTTCAGCAGGAATGCCGAG	TGCAGCACAAACATGTGCACAAGTGCCCATAGTGAAGACATGCATG	KN290627.1_scaffold-18396	159197	1	5.50E-16	12:A>C	12	0.975936	0.99726	0.035616	0.964384	0.00274	0.032877	0.005464	0.068696	0.03708	11.85339	6.57143	1	0	0	0	0	0	0	0	0	0	0	0	0	0	0	0	0	0	0	0	0	0	0	0	0	0	0	0	0	0
23112529|F|0-12:G>A-12:G>A	TGCAGCACAAAGGACCGGCACAAATTTGTGCGGCTACTATTTATACTGCTGCAAATGCATGAGCGGTTC	TGCAGCACAAAGGACCGGCACAAATTTGTGCGGCTACTATTTATACTGCTGCAAATGCATG	KN287256.1_scaffold-13483	15355	1	4.20E-24	12:G>A	12	0.997326	1	0.002681	0.997319	0	0.002681	0	0.005348	0.002674	7.78925	3	1	0	0	0	0	0	0	0	0	0	0	0	0	0	0	0	0	0	0	0	0	0	0	0	0	0	0	0	0	0
23112532|F|0-22:C>A-22:C>A	TGCAGCACAAATCACTGACAGACATTGTGCTGCTGTTTTATTTGCCACTGAAAGAGCATGAGCGGTTCA	TGCAGCACAAATCACTGACAGACATTGTGCTGCTGTTTTATTTGCCACTGAAAGAGCATG	KN284045.1_scaffold-8865	38260	1	1.47E-23	22:C>A	22	0.983957	1	0.002717	0.997283	0	0.002717	0	0.00542	0.00271	8.5655	3	1	0	0	0	0	0	0	0	0	0	0	0	0	0	0	0	0	0	0	0	0	0	0	0	0	0	0	0	0	0
23112533|F|0-24:T>G-24:T>G	TGCAGCACAAATTTCTCCCACTGCTTTTTGCCGTGGTGCATGAGCGGTTCAGCAGGAATGCCGAGACCG	TGCAGCACAAATTTCTCCCACTGCTTTTTGCCGTGGTGCATG	KN293463.1_scaffold-22592	41210	1	7.45E-14	24:T>G	24	0.97861	1	0.002732	0.997268	0	0.002732	0	0.00545	0.002725	8.98031	3	1	0	0	0	0	0	0	0	0	0	0	0	0	0	0	0	0	0	0	0	0	0	0	0	0	0	0	0	0	0
23112534|F|0-48:C>G-48:C>G	TGCAGCACAAATTTGTGCCACTATTTGTGCTGATACAAACTTATGCCCCTGTTTGTGTGCATGAGCGGT	TGCAGCACAAATTTGTGCCACTATTTGTGCTGATACAAACTTATGCCCCTGTTTGTGTGCATG	KN283878.1_scaffold-8626	215022	1	3.43E-25	48:C>G	48	0.997326	1	0.008043	0.991957	0	0.008043	0	0.015956	0.007978	11.62473	7	1	0	0	0	0	0	0	0	0	0	0	0	0	0	0	0	0	0	0	0	0	0	0	0	0	0	0	0	0	0
23112537|F|0-23:C>T-23:C>T	TGCAGCACAAGTGAATGCTTCTTCTGCATTAGGGCTTAAAGCAAGCAAGAGCTGGCTCATGTTGCATGA	TGCAGCACAAGTGAATGCTTCTTCTGCATTAGGGCTTAAAGCAAGCAAGAGCTGGCTCATGTTGCATGA	JRXG01018267.1_scaffold-3391_1	7002	1	6.63E-28	23:C>T	23	1	1	0.02139	0.97861	0	0.02139	0	0.041866	0.020933	9.31915	4.3	1	0	0	0	0	0	0	0	2	0	0	0	0	0	0	0	2	0	0	0	0	0	0	0	0	0	0	0	0	0
23112539|F|0-47:G>A-47:G>A	TGCAGCACAAGTTTGTGCACCTGGCTGGGGCACAAGGGCGCTACAGGGTGGGGCCTGCATGAGCGGTTC	TGCAGCACAAGTTTGTGCACCTGGCTGGGGCACAAGGGCGCTACAGGGTGGGGCCTGCATG	KN277965.1_scaffold-256	77334	1	4.20E-24	47:G>A	47	0.997326	1	0.002681	0.997319	0	0.002681	0	0.005348	0.002674	7.52878	5	1	0	0	0	0	0	0	0	0	0	0	0	0	0	0	0	0	0	0	0	0	0	0	0	0	0	0	0	0	0
23112543|F|0-47:G>A-47:G>A	TGCAGCACACAAAGCACTGGGACAACGTGTCCCACTGCAAAGCACACGGGCAGGGGCTTGCACTGCGGC	TGCAGCACACAAAGCACTGGGACAACGTGTCCCACTGCAAAGCACACGGGCAGGGGCTTGCACTGCGGC	KN283377.1_scaffold-7911	110968	1	1.84E-28	47:G>A	47	0.970588	0.997245	0.008264	0.991736	0.002755	0.00551	0.005494	0.016392	0.010943	3.44295	3	1	0	0	0	0	0	0	0	0	0	0	0	0	0	0	0	0	0	0	0	0	0	0	0	0	0	0	0	0	0
23112546|F|0-20:C>T-20:C>T	TGCAGCACACAGCAACACTGCGCACAGCAGCCCAGGGGGGAAGTGCAGAGAAGTGAGTGCAGGCGGCAT	TGCAGCACACAGCAACACTGCGCACAGCAGCCCAGGGGGGAAGTGCAGAGAAGTGAGTGCAGGCGGCAT	KN285193.1_scaffold-10495	347050	1	1.84E-28	20:C>T	20	1	0.997326	0.090909	0.909091	0.002674	0.088235	0.005333	0.165289	0.085311	9.82051	4.55	1	0	0	0	0	0	2	0	0	0	0	0	0	0	0	0	0	0	0	0	0	2	0	0	0	0	0	0	0	0
23112548|F|0-36:G>A-36:G>A	TGCAGCACACATGCCCCAAGTGGCATGAGAAACCTCGGTGTGTGGCATGAGCGGTTCAGCAGGAATGCC	TGCAGCACACATGCCCCAAGTGGCATGAGAAACCTCGGTGTGTGGCATG	KN287898.1_scaffold-14422	10137	1	1.35E-17	36:G>A	36	0.986631	1	0.00542	0.99458	0	0.00542	0	0.010781	0.005391	9.67749	5.5	1	0	0	0	0	0	0	0	0	0	0	0	0	0	0	0	0	0	0	0	0	0	0	0	0	0	0	0	0	0
23112557|F|0-36:T>C-36:T>C	TGCAGCACACTGAGGCTGGTTGGAGCAGCCTGAGGATGACAAGCTGACCCCCAGGATCTCCTGCCATCC	TGCAGCACACTGAGGCTGGTTGGAGCAGCCTGAGGATGACAAGCTGACCCCCAGGATCTCCTGCCATCC	KN287535.1_scaffold-13894	1283	1	1.84E-28	36:T>C	36	1	0.967914	0.280749	0.719251	0.032086	0.248663	0.062112	0.403858	0.232985	5.55333	4.09231	1	0	0	0	0	2	2	0	2	0	2	0	2	0	1	2	2	0	2	0	0	2	0	0	0	2	0	2	0	2
23112559|F|0-9:C>T-9:C>T	TGCAGCACACTTTCCAGGTTGCGCTTTGGTGGTGTATGTGCTTCAGCAAAATAGAATCACCTAGATGCA	TGCAGCACACTTTCCAGGTTGCGCTTTGGTGGTGTATGTGCTTCAGCAAAATAGAATCACCTAGATGCA	KN281845.1_scaffold-5739	55900	1	1.84E-28	9:C>T	9	0.997326	0.97319	0.252011	0.747989	0.02681	0.225201	0.052182	0.377003	0.214592	9.43956	6.13675	1	0	0	0	0	2	2	0	2	0	2	0	0	2	0	2	0	0	0	0	0	0	0	0	2	2	0	0	2	0
23112581|F|0-45:A>T-45:A>T	TGCAGCACAGGGGAAACTTGGCAGCATGTATGCAACCGGTCTGACAGTGTACGATTAGCGCATGAGCGG	TGCAGCACAGGGGAAACTTGGCAGCATGTATGCAACCGGTCTGACAGTGTACGATTAGCGCATG		0	0	999	45:A>T	45	0.991979	1	0.161725	0.838275	0	0.161725	0	0.27114	0.13557	5.94828	3.85333	1	0	0	2	2	0	0	0	2	0	2	0	2	0	2	0	0	2	2	0	0	0	0	0	0	2	0	0	0	0
23112583|F|0-10:G>A-10:G>A	TGCAGCACAGGGTTTGCTGTTTGCACGTTCTCAGCATGGATTGCTGCACAACTGGGACGCATGAGCGGT	TGCAGCACAGGGTTTGCTGTTTGCACGTTCTCAGCATGGATTGCTGCACAACTGGGACGCATG	KN288742.1_scaffold-15625	123432	1	3.43E-25	10:G>A	10	0.997326	0.991957	0.088472	0.911528	0.008043	0.080429	0.015956	0.161289	0.088623	8.69978	4.71429	1	0	1	0	0	0	0	0	0	0	0	0	0	0	0	0	0	0	0	1	0	0	0	0	0	0	0	0	0	0
23112588|F|0-6:A>C-6:A>C	TGCAGCACAGTTCAGAAGAGGCGGGTGAAGGTCTTGGCTCTACCAGATCCCCTGCGTGGCCTCAGGCAT	TGCAGCACAGTTCAGAAGAGGCGGGTGAAGGTCTTGGCTCTACCAGATCCCCTGCGTGGCCTCAGGCAT	KN285497.1_scaffold-10945	91486	1	1.84E-28	6:A>C	6	0.997326	1	0.002681	0.997319	0	0.002681	0	0.005348	0.002674	8.76709	3	1	0	0	0	0	0	0	0	0	0	0	0	0	0	0	0	0	0	0	0	0	0	0	0	0	0	0	0	0	0
23112592|F|0-24:T>G-24:T>G	TGCAGCACATCAAATGATGATTCTTCATCCTTGATGTAAGTGAATGGATACTTCTGTGGTTCTCTGGGG	TGCAGCACATCAAATGATGATTCTTCATCCTTGATGTAAGTGAATGGATACTTCTGTGGTTCTCTGGGG	KN289295.1_scaffold-16412	23935	1	1.84E-28	24:T>G	24	0.997326	0.986595	0.101877	0.898123	0.013405	0.088472	0.02645	0.182996	0.104723	8.48584	4.38	1	0	0	0	2	0	0	0	0	0	0	0	0	0	0	0	0	0	0	0	0	0	0	0	0	0	0	0	0	0
23112595|F|0-55:C>T-55:C>T	TGCAGCACATGCACTGCTGCCATGGCATTAGCCAGGTTCAAGTGCCCTGTGTGTACTCCTCCTGCATTA	TGCAGCACATGCACTGCTGCCATGGCATTAGCCAGGTTCAAGTGCCCTGTGTGTACTCCTCCTGCATTA	KN281767.1_scaffold-5630	123836	1	1.84E-28	55:C>T	55	0.997326	1	0.013405	0.986595	0	0.013405	0	0.02645	0.013225	10.21535	3.8	1	0	0	0	0	0	0	0	0	0	0	0	0	0	0	0	0	0	0	0	0	0	0	0	0	0	0	0	0	0
23112596|F|0-26:C>A-26:C>A	TGCAGCACATGCAGTTATATAAGTGGCAAAATGCACACCAGTGCTGAGAAAATGGCAGCAGCATGAGCG	TGCAGCACATGCAGTTATATAAGTGGCAAAATGCACACCAGTGCTGAGAAAATGGCAGCAGCATG	KN288475.1_scaffold-15245	107955	3	2.80E-26	26:C>A	26	0.991979	1	0.005391	0.994609	0	0.005391	0	0.010724	0.005362	7.65525	4.5	1	0	0	0	0	0	0	0	0	0	0	0	0	0	0	0	0	0	0	0	0	0	0	0	0	0	0	0	0	0
23112598|F|0-20:G>C-20:G>C	TGCAGCACATGGAGCGGCGGGACAATGTGTCCCGCTCAAAGCAACCAAGCAGGAGCATGAGCGGTTCAG	TGCAGCACATGGAGCGGCGGGACAATGTGTCCCGCTCAAAGCAACCAAGCAGGAGCATG	KN284133.1_scaffold-8985	170393	1	5.12E-23	20:G>C	20	0.981283	1	0.002725	0.997275	0	0.002725	0	0.005435	0.002717	7.42358	3	1	0	0	0	-	0	0	2	0	0	0	0	0	0	0	0	0	0	0	0	0	0	0	0	0	0	0	0	0	0
23112599|F|0-20:T>G-20:T>G	TGCAGCACATGGCAGCAGGGTGTGGCATGTGGGCACACGGCAGCAGAGTGCTAAATGGGAAGCTAGCCT	TGCAGCACATGGCAGCAGGGTGTGGCATGTGGGCACACGGCAGCAGAGTGCTAAATGGGAAGCTAGCCT	KN288283.1_scaffold-14964	43703	1	1.84E-28	20:T>G	20	1	1	0.002674	0.997326	0	0.002674	0	0.005333	0.002667	11.02345	3	1	0	0	0	0	0	0	2	0	0	0	0	0	0	0	0	0	0	0	0	0	0	0	0	0	0	0	0	0	0
23112601|F|0-18:G>A-18:G>A	TGCAGCACATGGGAAGCCGGCTTCAGCTGCATGGTGCTTTTCCCGGCCAGAACTGACCTGGCTGGGTCC	TGCAGCACATGGGAAGCCGGCTTCAGCTGCATGGTGCTTTTCCCGGCCAGAACTGACCTGGCTGGGTCC	KN283326.1_scaffold-7846	585458	2	1.84E-28	18:G>A	18	1	0.986631	0.080214	0.919786	0.013369	0.066845	0.026381	0.147559	0.08697	7.93737	7.41176	1	0	0	0	0	2	0	0	0	0	0	0	2	0	0	2	0	0	0	0	0	0	0	0	0	0	0	0	0	0
23112607|F|0-47:C>T-47:C>T	TGCAGCACATTAAACACCTGCAAAGAAAACTCCCTCTTCTCTCCAAGCAGGAGAGTGCCCTCCCCCTCC	TGCAGCACATTAAACACCTGCAAAGAAAACTCCCTCTTCTCTCCAAGCAGGAGAGTGCCCTCCCCCTCC	KN278762.1_scaffold-1376	157611	1	8.58E-27	47:C>T	47	0.925134	0.00578	1	0	0.99422	0.00578	0.011494	0	0.005747	3.33333	3.4061	1	1	1	-	1	1	1	1	1	1	1	1	1	1	-	1	1	1	1	1	1	1	1	1	-	1	1	1	1	1
23112617|F|0-21:T>G-21:T>G	TGCAGCACCACATATCACACATTTAGATGTTCTCCATGCTGCAAGAGAGTGCTGGCCATGCATGAGCGG	TGCAGCACCACATATCACACATTTAGATGTTCTCCATGCTGCAAGAGAGTGCTGGCCATGCATG	KN293851.1_scaffold-23174	203325	8	9.81E-26	21:T>G	21	0.994652	1	0.002688	0.997312	0	0.002688	0	0.005362	0.002681	8.78326	3	1	0	0	0	0	2	0	0	0	0	0	0	0	0	0	0	0	0	0	0	0	0	0	0	0	0	0	0	0	0
23118543|F|0-36:T>C-36:T>C	TGCAGCACCAGACAGCCAGTTATGCCTGCTCCTCCCTGGAGAAGGTGCATGAGCGGTTCAGCAGGAATG	TGCAGCACCAGACAGCCAGTTATGCCTGCTCCTCCCTGGAGAAGGTGCATG		0	0	999	36:T>C	36	0.550802	0.985437	0.019417	0.980583	0.014563	0.004854	0.028702	0.038081	0.033391	7.22984	4.75	1	-	-	0	0	-	-	-	0	-	0	0	0	0	0	0	0	-	0	-	-	0	-	-	0	0	-	0	-	0
23112631|F|0-51:C>T-51:C>T	TGCAGCACCATATTGGGGCTCTCCACATATTCTGGACTGCTCAGGCACCCACCCCAACTATATATTCTG	TGCAGCACCATATTGGGGCTCTCCACATATTCTGGACTGCTCAGGCACCCACCCCAACTATATATTCTG	KN285081.1_scaffold-10342	40122	1	1.84E-28	51:C>T	51	0.981283	1	0.016349	0.983651	0	0.016349	0	0.032163	0.016081	5.28821	2.85714	1	0	0	0	0	0	0	0	0	0	0	0	0	0	0	0	0	0	0	0	0	0	0	-	0	0	0	0	0	0
23112637|F|0-42:C>G-42:C>G	TGCAGCACCCAGCATGGCTCCAGAGGGGCATTAGGACTGGGACAAAGCCACGCATGAGCGGTTCAGCAG	TGCAGCACCCAGCATGGCTCCAGAGGGGCATTAGGACTGGGACAAAGCCACGCATG	KN280379.1_scaffold-3669	634733	1	2.17E-21	42:C>G	42	1	0.997326	0.010695	0.989305	0.002674	0.008021	0.005333	0.021162	0.013247	10.84829	8.5	1	0	0	0	0	0	0	0	0	0	0	0	0	0	0	0	0	0	0	0	0	0	0	0	0	0	0	0	0	0
23112640|F|0-43:T>C-43:T>C	TGCAGCACCCAGGAGTAGGATCTCAAGGCACCTCAGGGTGCCATGACACCATGGTTGGAGAATTACTGG	TGCAGCACCCAGGAGTAGGATCTCAAGGCACCTCAGGGTGCCATGACACCATGGTTGGAGAATTACTGG	KN292449.1_scaffold-21082	43929	1	1.84E-28	43:T>C	43	0.983957	0.978261	0.171196	0.828804	0.021739	0.149457	0.042533	0.283775	0.163154	6.92239	4.01316	1	2	0	1	0	0	0	2	0	0	0	0	0	0	0	0	0	0	0	0	0	0	0	0	2	0	2	0	0	0
23112648|F|0-25:G>A-25:G>A	TGCAGCACCCTGGTTGAGAATTACTGCCCTGGCTACTAACTGACTGTGGGGACTCTTTATGCTAAGCAT	TGCAGCACCCTGGTTGAGAATTACTGCCCTGGCTACTAACTGACTGTGGGGACTCTTTATGCTAAGCAT	KN289657.1_scaffold-16962	171736	1	1.84E-28	25:G>A	25	0.986631	0.98916	0.054201	0.945799	0.01084	0.04336	0.021445	0.102526	0.061985	7.56893	4.12	1	0	0	0	0	0	0	0	0	0	0	0	0	0	0	0	0	0	0	0	0	0	0	0	0	0	0	0	0	0
23112652|F|0-42:C>A-42:C>A	TGCAGCACCGTGTACTGCACAGCCATGGTCATCTGGATGCGGCCTGTAAGGGCTAAAAGGAGCATGAGC	TGCAGCACCGTGTACTGCACAGCCATGGTCATCTGGATGCGGCCTGTAAGGGCTAAAAGGAGCATGAGC	KN281657.1_scaffold-5474	51878	1	8.58E-27	42:C>A	42	1	0.981283	0.200535	0.799465	0.018717	0.181818	0.036733	0.320641	0.178687	10.66377	6.98889	1	0	0	0	0	0	0	0	0	2	0	2	0	0	0	0	0	0	0	0	0	0	0	0	0	2	0	0	0	0
23112653|F|0-6:A>C-6:A>C	TGCAGCACCTCAAACGTGGGCCTGCGCAGCCAGTCACCGCCCACCCTCTCAGCAGTGCATGAGCGGTTC	TGCAGCACCTCAAACGTGGGCCTGCGCAGCCAGTCACCGCCCACCCTCTCAGCAGTGCATG	KN281086.1_scaffold-4642	151008	1	4.20E-24	6:A>C	6	1	1	0.002674	0.997326	0	0.002674	0	0.005333	0.002667	9.40685	3	1	0	0	0	0	0	0	0	0	0	0	0	0	0	0	0	0	0	0	0	0	0	0	0	0	0	0	0	0	0
23112654|F|0-25:C>T-25:C>T	TGCAGCACCTCCCCAGCACCAGTAGCATCACACAGCTCCAGCACATGCTCCAAACTCACTCCTGCCAGA	TGCAGCACCTCCCCAGCACCAGTAGCATCACACAGCTCCAGCACATGCTCCAAACTCACTCCTGCCAGA	KN290779.1_scaffold-18610	8001	1	1.84E-28	25:C>T	25	0.975936	1	0.005479	0.994521	0	0.005479	0	0.010899	0.005449	5.35982	4	1	0	0	0	-	0	0	0	0	0	0	0	0	0	0	0	0	0	0	0	0	0	0	0	0	0	0	0	-	0
23112657|F|0-40:G>A-40:G>A	TGCAGCACCTCTAGGGCTTTTGAGGGGCCACAAAACACACGCAGCGCCCATGAAAAGATTCTGTGCGCT	TGCAGCACCTCTAGGGCTTTTGAGGGGCCACAAAACACACGCAGCGCCCATGAAAAGATTCTGTGCGCT	KN285059.1_scaffold-10310	114637	1	1.84E-28	40:G>A	40	0.997326	1	0.002681	0.997319	0	0.002681	0	0.005348	0.002674	7.63519	4	1	0	0	0	0	0	0	0	0	0	0	0	0	0	0	0	0	0	0	0	0	0	0	0	0	0	0	0	0	0
23112660|F|0-43:T>C-43:T>C	TGCAGCACCTGACCAGTGGCACAAATAGGGACTGAAAAGCTGTTTTTGGGTCAGAAGCTTGGAAGACTT	TGCAGCACCTGACCAGTGGCACAAATAGGGACTGAAAAGCTGTTTTTGGGTCAGAAGCTTGGAAGACTT	KN286672.1_scaffold-12653	84472	1	1.84E-28	43:T>C	43	0.997326	1	0.010724	0.989276	0	0.010724	0	0.021218	0.010609	7.66667	3.8	1	0	0	0	0	0	0	0	0	0	0	0	0	0	0	0	0	0	0	0	0	0	0	0	0	0	0	0	0	0
23112662|F|0-24:T>C-24:T>C	TGCAGCACCTGCTGTGTTGGGCTCTGGGCTTTCAGACTAGACCTCCTCTGCCAACGCTGCATGAGCGGT	TGCAGCACCTGCTGTGTTGGGCTCTGGGCTTTCAGACTAGACCTCCTCTGCCAACGCTGCATG	KN279257.1_scaffold-2075	32875	1	3.43E-25	24:T>C	24	0.997326	1	0.008043	0.991957	0	0.008043	0	0.015956	0.007978	7.27682	3.33333	1	0	0	0	0	2	0	0	0	0	0	2	0	0	0	0	0	0	0	0	0	0	0	0	0	0	0	0	0	0
23112667|F|0-21:C>T-21:C>T	TGCAGCACCTTGCTGAGCTGGCCTGTGTCATTGCAGCTGCATGAGCGGTTCAGCAGGAATGCCGAGACC	TGCAGCACCTTGCTGAGCTGGCCTGTGTCATTGCAGCTGCATG	KN287292.1_scaffold-13535	53521	1	2.19E-14	21:C>T	21	0.959893	1	0.002786	0.997214	0	0.002786	0	0.005556	0.002778	6.70909	3	1	0	0	0	0	0	0	0	0	0	0	0	0	0	0	0	0	0	0	0	0	0	0	0	0	0	0	0	0	0
23112674|F|0-12:T>C-12:T>C	TGCAGCACGCATTTGAGCCCTAGGACCTTGTACTGGCCCTGTCTGCAACGGACTGGTGGCATGAGCGGT	TGCAGCACGCATTTGAGCCCTAGGACCTTGTACTGGCCCTGTCTGCAACGGACTGGTGGCATG	KN284811.1_scaffold-9977	454021	1	3.43E-25	12:T>C	12	1	0.989305	0.139037	0.860963	0.010695	0.128342	0.021162	0.239412	0.130287	8.55819	4.65625	1	1	0	0	0	0	0	0	0	2	0	0	0	0	0	0	0	0	0	2	0	2	0	2	2	0	2	0	0	0
23112675|F|0-59:G>A-59:G>A	TGCAGCACGCCATGCCTCTGGCGTGTAATACATCCATATTTACACACACACACACACACGTAGAGGCAT	TGCAGCACGCCATGCCTCTGGCGTGTAATACATCCATATTTACACACACACACACACACGTAGAGGCAT	KN283429.1_scaffold-7983	28804	1	1.84E-28	59:G>A	59	0.97861	1	0.008197	0.991803	0	0.008197	0	0.016259	0.00813	4.24834	3	1	0	0	0	0	0	0	0	0	0	0	0	0	0	0	0	0	0	0	0	0	0	0	0	0	0	0	0	0	0
23112683|F|0-14:T>C-14:T>C	TGCAGCACGGTGTTTGGGCCCACAGTGCCTCCCACATTTGGTACACATCTGCTAGTTTGCTTTTTCTTG	TGCAGCACGGTGTTTGGGCCCACAGTGCCTCCCACATTTGGTACACATCTGCTAGTTTGCTTTTTCTTG	KN290790.1_scaffold-18622	148721	1	1.84E-28	14:T>C	14	0.983957	1	0.01087	0.98913	0	0.01087	0	0.021503	0.010751	9.94989	6.25	1	0	0	0	0	0	0	0	0	0	0	0	0	0	0	0	0	0	0	0	0	0	0	0	0	0	0	0	0	0
23112684|F|0-8:G>A-8:G>A	TGCAGCACGTGGGTGCAGGGCAGGGCAAGGCGCACCCCCCACACCCGCTCCTCACAGGGCATGAGCGGT	TGCAGCACGTGGGTGCAGGGCAGGGCAAGGCGCACCCCCCACACCCGCTCCTCACAGGGCATG	KN286752.1_scaffold-12774	327066	1	3.43E-25	8:G>A	8	0.997326	0.997319	0.034853	0.965147	0.002681	0.032172	0.005348	0.067276	0.036312	9.30472	4.33333	1	0	0	0	0	0	0	0	0	0	0	0	0	0	0	0	0	0	0	0	0	0	0	0	0	0	0	0	0	0
23112703|F|0-8:T>G-8:T>G	TGCAGCACTGACTAATTAACTCCACAGTAAAGTATCATCTACACATGCGTTCATATCAGGTTGCATAAA	TGCAGCACTGACTAATTAACTCCACAGTAAAGTATCATCTACACATGCGTTCATATCAGGTTGCATAAA	KN285526.1_scaffold-10987	56662	2	1.84E-28	8:T>G	8	0.919786	1	0.002907	0.997093	0	0.002907	0	0.005797	0.002899	3.79433	3	1	0	0	0	0	0	0	0	0	0	0	0	0	0	-	0	0	0	0	-	0	0	0	-	-	0	0	0	0	0
23112704|F|0-19:T>G-19:T>G	TGCAGCACTGAGCAGCCCATGCCCCTCATTACAGGGCACTTTTGGGAACTACAAGTCTCAGCATGAGCG	TGCAGCACTGAGCAGCCCATGCCCCTCATTACAGGGCACTTTTGGGAACTACAAGTCTCAGCATG	KN291311.1_scaffold-19418	48549	1	2.80E-26	19:T>G	19	1	0.994652	0.13369	0.86631	0.005348	0.128342	0.010638	0.231634	0.121136	11.52146	8.01613	1	0	0	0	0	0	0	0	0	0	0	0	0	0	0	0	0	0	0	0	0	2	0	0	0	0	0	0	0	0
23112705|F|0-26:C>T-26:C>T	TGCAGCACTGAGCTGGCGAGGCAGCGCGCCTGCTGGTATCACCCGCTCGAGCAGCTGCATGAGCGGTTC	TGCAGCACTGAGCTGGCGAGGCAGCGCGCCTGCTGGTATCACCCGCTCGAGCAGCTGCATG	KN292555.1_scaffold-21230	27590	1	4.20E-24	26:C>T	26	1	0.997326	0.016043	0.983957	0.002674	0.013369	0.005333	0.031571	0.018452	6.82655	3.33333	1	0	0	0	0	0	0	0	0	0	0	0	0	0	0	0	0	0	0	0	0	0	0	0	0	0	0	0	0	0
23110507|F|0-20:G>A-20:G>A	TGCAGCACTGATGAATGCACGGTCACGTGGGTGGCAAACTGGCTCCAGGAGCGCATGAGCGGTTCAGCA	TGCAGCACTGATGAATGCACGGTCACGTGGGTGGCAAACTGGCTCCAGGAGCGCATG	KN289187.1_scaffold-16261	104493	9	2.90E-20	20:G>A	20	0.441176	0.993939	0.012121	0.987879	0.006061	0.006061	0.012048	0.023949	0.017998	5.04455	3	1	-	-	-	0	-	0	-	0	-	-	-	0	-	0	-	-	-	-	-	-	-	-	-	0	-	0	-	0	-
23112715|F|0-35:G>A-35:G>A	TGCAGCACTGGGCACTTTGAAAAGCTGCTGGTGCTGTGATGCATGAGCGGTTCAGCAGGAATGCCGAGA	TGCAGCACTGGGCACTTTGAAAAGCTGCTGGTGCTGTGATGCATG	KN279519.1_scaffold-2450	151412	1	1.88E-15	35:G>A	35	0.994652	0.991935	0.056452	0.943548	0.008065	0.048387	0.015999	0.10653	0.061264	11.48922	5.20833	1	0	0	0	0	0	0	0	0	0	0	0	0	0	0	2	0	0	0	0	0	0	0	0	0	0	0	0	0	0
23112718|F|0-17:C>A-17:C>A	TGCAGCACTGGGGGAGCCCATGGCACAGCGCACCAGGAAACTCCACTGCTGTGGAGCCAAAATGCGGGG	TGCAGCACTGGGGGAGCCCATGGCACAGCGCACCAGGAAACTCCACTGCTGTGGAGCCAAAATGCGGGG	KN281973.1_scaffold-5908	120439	1	8.58E-27	17:C>A	17	1	0.981283	0.216578	0.783422	0.018717	0.197861	0.036733	0.339343	0.188038	8.44783	5.33654	1	0	0	0	0	1	0	0	2	0	0	2	2	2	2	2	0	2	2	0	0	0	0	0	0	2	0	0	0	2
23112721|F|0-17:G>C-17:G>C	TGCAGCACTGTCAGACCGATGGTTTGTGTGGGGAGAATATGCCTGGCCTTACCTGACCTGGCCTGGCCT	TGCAGCACTGTCAGACCGATGGTTTGTGTGGGGAGAATATGCCTGGCCTTACCTGACCTGGCCTGGCCT	KN288707.1_scaffold-15578	78527	1	1.84E-28	17:G>C	17	1	1	0.002674	0.997326	0	0.002674	0	0.005333	0.002667	8.53731	3	1	0	0	0	0	0	0	0	0	0	0	0	0	0	0	0	0	0	0	0	0	0	0	0	0	0	0	0	0	0
23112729|F|0-26:C>T-26:C>T	TGCAGCACTGTCCCTTACCGTGGGGGCCTCGATTTAGCCCCTGCCCCTTCCCTCCCCCACAAACTGACC	TGCAGCACTGTCCCTTACCGTGGGGGCCTCGATTTAGCCCCTGCCCCTTCCCTCCCCCACAAACTGACC	KN293585.1_scaffold-22797	867619	7	1.84E-28	26:C>T	26	0.989305	0.986486	0.02973	0.97027	0.013514	0.016216	0.026662	0.057692	0.042177	5.04204	3.30769	1	0	0	0	0	0	0	0	0	0	0	2	0	0	0	0	0	0	0	0	0	0	0	0	0	0	0	0	0	0
23112731|F|0-21:G>A-21:G>A	TGCAGCACTGTCTCTCACAGCGGGGGCCTCAGTCTAGCCCCCGCCTCTTCCCTCCGCCATGGACTGACC	TGCAGCACTGTCTCTCACAGCGGGGGCCTCAGTCTAGCCCCCGCCTCTTCCCTCCGCCATGGACTGACC	KN279635.1_scaffold-2634	307566	1	1.84E-28	21:G>A	21	0.997326	1	0.032172	0.967828	0	0.032172	0	0.062273	0.031137	6.91898	3.3125	1	0	0	0	0	0	0	0	0	0	0	0	0	0	0	0	0	0	0	0	0	0	0	0	0	0	0	0	0	0
23112733|F|0-30:A>G-30:A>G	TGCAGCACTGTGCCCAGCACCCCGCCACGCACTCCTCCACTGCCGGCATGAGCGGTTCAGCAGGAATGC	TGCAGCACTGTGCCCAGCACCCCGCCACGCACTCCTCCACTGCCGGCATG	KN280891.1_scaffold-4368	40757	1	3.91E-18	30:A>G	30	0.997326	1	0.016086	0.983914	0	0.016086	0	0.031654	0.015827	12.21413	4.14286	1	0	0	0	0	0	0	0	0	0	0	0	0	0	0	0	0	0	0	0	0	0	0	0	0	0	0	0	0	0
23112737|F|0-66:C>G-66:C>G	TGCAGCACTTAGAGCTGGGTCGGAGCAGTCCCAGGCCACCTGCCAGCCAGGGCTATTCTGACCTGGCTC	TGCAGCACTTAGAGCTGGGTCGGAGCAGTCCCAGGCCACCTGCCAGCCAGGGCTATTCTGACCTGGCTC	KN280842.1_scaffold-4303	124508	1	1.84E-28	66:C>G	66	0.981283	0.980926	0.144414	0.855586	0.019074	0.125341	0.03742	0.247117	0.142268	5.22124	3.08955	1	0	0	0	0	0	0	0	0	2	0	0	0	2	0	0	0	0	0	0	0	0	0	0	0	0	0	0	0	0
23112748|F|0-68:G>A-68:G>A	TGCAGCACTTTGAGCCAGGGTGAAGCAGTCCTGGGCTGGCAGAGGGCCATGCCTGAGCTTTAGGAAATG	TGCAGCACTTTGAGCCAGGGTGAAGCAGTCCTGGGCTGGCAGAGGGCCATGCCTGAGCTTTAGGAAATG	KN288801.1_scaffold-15705	148354	1	1.84E-28	68:G>A	68	0.989305	0.991892	0.064865	0.935135	0.008108	0.056757	0.016085	0.121315	0.0687	4.7037	2.70968	1	0	0	0	0	0	0	0	0	2	0	0	0	0	0	0	0	0	0	0	0	0	0	0	0	0	0	0	0	0
23112759|F|0-28:A>G-28:A>G	TGCAGCAGAATACTTCAACTATCCTGTCATGGCAGGTGAGCTGTGCATGAGCGGTTCAGCAGGAATGCC	TGCAGCAGAATACTTCAACTATCCTGTCATGGCAGGTGAGCTGTGCATG	KN285596.1_scaffold-11080	265340	1	1.35E-17	28:A>G	28	0.997326	0.994638	0.037534	0.962466	0.005362	0.032172	0.010666	0.072249	0.041458	12.00216	5.94444	1	0	0	0	0	0	0	0	0	0	0	0	0	0	0	0	0	0	0	0	0	0	0	0	0	0	0	0	0	0
23112765|F|0-20:C>T-20:C>T	TGCAGCAGACCCTATTCCTCCAACACAATATAGTCCGTCATATGAATGTAACTGTAGCTTAAGCATGAG	TGCAGCAGACCCTATTCCTCCAACACAATATAGTCCGTCATATGAATGTAACTGTAGCTTAAGCATGAG	KN282860.1_scaffold-7173	19941	1	2.38E-27	20:C>T	20	0.986631	0.99729	0.02168	0.97832	0.00271	0.01897	0.005405	0.04242	0.023913	9.94168	5.33333	1	0	0	0	0	0	2	0	0	0	2	0	0	0	0	0	0	0	0	0	0	0	0	0	0	0	0	0	0	0
23112774|F|0-38:G>C-38:G>C	TGCAGCAGAGACAGCTCCAGATCCCACAATGTGCCTGTGCCAGAACCAGAACTGCTGCCCTTGTTGCAT	TGCAGCAGAGACAGCTCCAGATCCCACAATGTGCCTGTGCCAGAACCAGAACTGCTGCCCTTGTTGCAT	KN290123.1_scaffold-17655	168719	1	1.84E-28	38:G>C	38	0.986631	0.99458	0.03252	0.96748	0.00542	0.0271	0.010781	0.062926	0.036853	6.24835	3.33333	1	0	0	0	0	0	0	0	0	0	0	0	0	0	0	0	0	0	0	0	0	0	0	0	0	0	0	0	0	0
23112779|F|0-68:A>G-68:A>G	TGCAGCAGAGCAGGGGGAGTGGGGAGAGGAGGTGTCTGGCTCTTCAGCAAGGTAAGGAGGCAGGGGCAA	TGCAGCAGAGCAGGGGGAGTGGGGAGAGGAGGTGTCTGGCTCTTCAGCAAGGTAAGGAGGCAGGGGCAA	KN279402.1_scaffold-2275	171074	1	6.63E-28	68:A>G	68	0.983957	0.002717	1	0	0.997283	0.002717	0.00542	0	0.00271	10	5.00659	1	1	1	1	1	1	1	1	1	1	1	1	1	1	1	1	1	1	1	1	1	1	1	1	1	1	1	1	1	1
23112780|F|0-27:G>C-27:G>C	TGCAGCAGAGCCACCTGCACCCCTGGGGCAGCTGCCAGTGGGCTATGGCTGCACAGTTGGCCTTCAGGC	TGCAGCAGAGCCACCTGCACCCCTGGGGCAGCTGCCAGTGGGCTATGGCTGCACAGTTGGCCTTCAGGC	KN281625.1_scaffold-5434	78902	5	8.58E-27	27:G>C	27	0.970588	0.002755	1	0	0.997245	0.002755	0.005494	0	0.002747	5	4.39159	1	1	1	1	1	1	1	1	1	1	1	1	1	1	1	1	1	1	1	1	1	1	1	1	1	1	1	1	1	1
23112786|F|0-58:G>A-58:G>A	TGCAGCAGAGGAAAGCCACCAGAGACTGGATGTAGATTCTTTAGCACTGCTCCAATGGGTAGCATGAGC	TGCAGCAGAGGAAAGCCACCAGAGACTGGATGTAGATTCTTTAGCACTGCTCCAATGGGTAGCATGAGC	KN289934.1_scaffold-17382	47991	1	8.58E-27	58:G>A	58	0.983957	0.98913	0.05163	0.94837	0.01087	0.040761	0.021503	0.097929	0.059716	8.61233	3.40909	1	0	0	0	0	0	0	0	0	0	0	0	0	0	0	0	0	0	0	0	0	0	0	0	0	0	0	0	0	0
23112787|F|0-27:C>T-27:C>T	TGCAGCAGAGGAAATTTAGATTGAAGACCATAGGCGGAGGGAGAAAAAATATTTTGGGGGGCTGAGCAT	TGCAGCAGAGGAAATTTAGATTGAAGACCATAGGCGGAGGGAGAAAAAATATTTTGGGGGGCTGAGCAT	KN278158.1_scaffold-519	18446	1	1.84E-28	27:C>T	27	1	0.997326	0.040107	0.959893	0.002674	0.037433	0.005333	0.076997	0.041165	6.78755	3.78947	1	0	0	0	0	0	0	0	0	0	0	0	0	0	0	0	0	0	0	0	0	0	0	0	0	0	0	0	0	0
23112788|F|0-24:C>T-24:C>T	TGCAGCAGAGGAGATCTAGGTACACGGACCCTGGCCAGCAACCAGAGTGTGGCTCTAGCCCTCCAGGCT	TGCAGCAGAGGAGATCTAGGTACACGGACCCTGGCCAGCAACCAGAGTGTGGCTCTAGCCCTCCAGGCT	KN284648.1_scaffold-9741	36640	1	1.84E-28	24:C>T	24	1	1	0.042781	0.957219	0	0.042781	0	0.081901	0.040951	8.63462	3.94444	1	0	0	0	0	0	0	0	0	0	0	0	0	0	0	0	0	0	0	0	0	0	0	0	0	0	0	0	0	0
23112789|F|0-54:C>T-54:C>T	TGCAGCAGAGGCAATCCTGCCAGGCAGAGCCTGTCTGCCAGCCATTGCATGGCTCCAGGTGGTCTGGCT	TGCAGCAGAGGCAATCCTGCCAGGCAGAGCCTGTCTGCCAGCCATTGCATGGCTCCAGGTGGTCTGGCT	KN285714.1_scaffold-11242	194311	1	1.84E-28	54:C>T	54	0.997326	0.986595	0.174263	0.825737	0.013405	0.160858	0.02645	0.28779	0.15712	6.82289	3.82051	1	0	0	0	0	0	0	0	0	0	0	0	0	0	0	0	0	0	0	0	0	0	0	0	0	0	0	0	1	0
23112793|F|0-10:G>A-10:G>A	TGCAGCAGAGGTTGCAGGCTTCTCTGCCCCTGGAGGAGGTTGGTCAGGCTCTGCCTCTGGGGTGGAGGC	TGCAGCAGAGGTTGCAGGCTTCTCTGCCCCTGGAGGAGGTTGGTCAGGCTCTGCCTCTGGGGTGGAGGC	KN282897.1_scaffold-7222	26090	3	1.84E-28	10:G>A	10	0.994652	0.994624	0.018817	0.981183	0.005376	0.013441	0.010695	0.036926	0.023811	5.65152	3.71429	1	0	0	0	0	0	0	0	0	0	0	0	0	0	0	0	0	0	0	0	0	0	0	0	0	0	0	0	0	0
23112798|F|0-20:T>G-20:T>G	TGCAGCAGAGTTGCATTACCTACAGCAGTGGGGATCAACCTTTTTGGCGGGCATGAGCGGTTCAGCAGG	TGCAGCAGAGTTGCATTACCTACAGCAGTGGGGATCAACCTTTTTGGCGGGCATG	KN282746.1_scaffold-7003	278155	1	7.54E-21	20:T>G	20	0.962567	1	0.002778	0.997222	0	0.002778	0	0.00554	0.00277	7.95546	3	1	0	0	0	0	0	0	0	0	0	0	0	0	0	0	0	0	0	0	0	0	0	0	0	0	0	0	0	0	0
23112816|F|0-8:C>A-8:C>A	TGCAGCAGCAAGGATGAGAAACCAGGAATGACACTCGCATACTTGTGCAGCATCCTGGTGCGATCTACG	TGCAGCAGCAAGGATGAGAAACCAGGAATGACACTCGCATACTTGTGCAGCATCCTGGTGCGATCTACG	KN284678.1_scaffold-9782	10904	1	1.84E-28	8:C>A	8	1	1	0.002674	0.997326	0	0.002674	0	0.005333	0.002667	9.42857	3	1	0	0	0	0	0	0	0	0	0	0	0	0	0	0	0	0	0	0	0	0	0	0	0	0	0	0	0	0	0
23112818|F|0-26:A>G-26:A>G	TGCAGCAGCAAGTGGCAAGGGGAGCCATGACACAGGCTGCTCTGCCCCAGCCAAGCAGGCCCTGGCATG	TGCAGCAGCAAGTGGCAAGGGGAGCCATGACACAGGCTGCTCTGCCCCAGCCAAGCAGGCCCTGGCATG	KN291344.1_scaffold-19460	9747	1	1.84E-28	26:A>G	26	0.997326	0.997319	0.013405	0.986595	0.002681	0.010724	0.005348	0.02645	0.015899	6.54077	3.5	1	0	0	0	0	0	0	0	0	0	0	0	0	0	0	0	0	0	0	0	0	0	0	0	0	0	0	0	0	0
23118545|F|0-10:T>C-10:T>C	TGCAGCAGCATGGAGTGGTGGATGGCAGTGGTGGCTGCTGCATGAGCGGTTCAGCAGGAATGCCGAGAC	TGCAGCAGCATGGAGTGGTGGATGGCAGTGGTGGCTGCTGCATG	KN283299.1_scaffold-7810	12666	1	2.99E-13	10:T>C	10	0.965241	0.00277	1	0	0.99723	0.00277	0.005525	0	0.002762	7	6.47204	1	1	1	1	1	1	-	1	1	1	1	1	1	1	1	1	1	1	1	1	1	1	1	1	1	1	1	1	1	1
23112827|F|0-27:T>C-27:T>C	TGCAGCAGCACTCAGTGCTGCCAAGGATGGGCAAAGAAAAAAAAGGAGAAAAAACCCCTGAGGCATGAG	TGCAGCAGCACTCAGTGCTGCCAAGGATGGGCAAAGAAAAAAAAGGAGAAAAAACCCCTGAGGCATGAG	KN288509.1_scaffold-15290	50661	1	2.38E-27	27:T>C	27	0.997326	0.991957	0.10992	0.89008	0.008043	0.101877	0.015956	0.195675	0.105815	6.02165	3.86275	1	0	0	0	0	0	0	0	0	0	0	0	2	0	2	0	0	0	0	0	0	0	0	0	0	0	2	0	0	0
23112837|F|0-15:C>T-15:C>T	TGCAGCAGCAGCATTCCTGCTGCTCAGAGCCTGGCCAGCAGCTGGAGTGTGGGTCTGGCTGTCCAGGCT	TGCAGCAGCAGCATTCCTGCTGCTCAGAGCCTGGCCAGCAGCTGGAGTGTGGGTCTGGCTGTCCAGGCT	KN280508.1_scaffold-3857	28554	5	1.84E-28	15:C>T	15	0.997326	1	0.002681	0.997319	0	0.002681	0	0.005348	0.002674	5.93926	3	1	0	0	0	0	0	0	0	0	0	0	0	0	0	0	0	0	0	0	0	0	0	0	0	0	0	0	0	0	0
23112840|F|0-36:G>T-36:G>T	TGCAGCAGCAGCCATGATTTTTGTTGCTTTCTAATTGCTTTTAGTTCTCATTTTACGTTTTGCAAGGGA	TGCAGCAGCAGCCATGATTTTTGTTGCTTTCTAATTGCTTTTAGTTCTCATTTTACGTTTTGCAAGGGA	KN278391.1_scaffold-845	7377	1	1.84E-28	36:G>T	36	0.949198	1	0.014085	0.985915	0	0.014085	0	0.027772	0.013886	4.05963	3.6	1	0	0	0	0	0	-	0	0	0	0	0	0	-	0	0	0	0	0	0	0	0	0	-	-	0	0	0	0	0
23112842|F|0-49:C>T-49:C>T	TGCAGCAGCAGCCCACCCTCGCCCCACACACAGATCGAGGGCTACCCCCCCGTGCCTTCCTGGGATGCA	TGCAGCAGCAGCCCACCCTCGCCCCACACACAGATCGAGGGCTACCCCCCCGTGCCTTCCTGGGATGCA	KN286844.1_scaffold-12904	11813	3	1.84E-28	49:C>T	49	1	1	0.010695	0.989305	0	0.010695	0	0.021162	0.010581	10.6859	3.4	1	2	0	0	0	0	0	0	0	0	0	0	0	0	0	0	0	0	0	0	0	0	0	0	0	0	0	0	0	0
23112845|F|0-26:C>T-26:C>T	TGCAGCAGCAGCCCACCTCCACCCTGCGCATAAATTTGGGGGGCACATGCCCCCTGTGCCTTCCCCAGG	TGCAGCAGCAGCCCACCTCCACCCTGCGCATAAATTTGGGGGGCACATGCCCCCTGTGCCTTCCCCAGG	KN283326.1_scaffold-7846	48647	3	1.84E-28	26:C>T	26	1	1	0.064171	0.935829	0	0.064171	0	0.120106	0.060053	7.86538	3.66667	1	0	0	0	0	0	0	0	0	0	0	0	2	0	0	2	0	0	0	0	2	0	0	0	0	0	0	0	0	0
23112850|F|0-22:C>T-22:C>T	TGCAGCAGCAGCCTGCCCCACCCCGCACAGATCCCAAGGCACATGCCCCCCATACCTTCCCAGGGTGCA	TGCAGCAGCAGCCTGCCCCACCCCGCACAGATCCCAAGGCACATGCCCCCCATACCTTCCCAGGGTGCA	KN277920.1_scaffold-188	80818	1	1.84E-28	22:C>T	22	1	1	0.016043	0.983957	0	0.016043	0	0.031571	0.015785	11.13646	4.28571	1	0	0	0	0	0	0	0	0	0	0	0	0	0	0	0	0	0	0	0	0	0	0	0	0	0	0	0	0	0
23112853|F|0-20:G>A-20:G>A	TGCAGCAGCAGCCTGCCCTCGCCCTGTGCACAGATCCAGGGGCACACCCCCACCATGCCCTCCAAGGGT	TGCAGCAGCAGCCTGCCCTCGCCCTGTGCACAGATCCAGGGGCACACCCCCACCATGCCCTCCAAGGGT	KN285073.1_scaffold-10334	279533	5	1.84E-28	20:G>A	20	1	0.989305	0.179144	0.820856	0.010695	0.168449	0.021162	0.294103	0.157632	10.07775	4.84615	1	0	0	2	0	0	0	0	0	0	0	0	0	2	2	0	0	0	0	0	0	0	0	0	0	2	0	0	0	0
23112858|F|0-12:G>A-12:G>A	TGCAGCAGCAGCGATTGGGGCCTCTGGGCACTCATGGCACTCCCCGCATGAGCGGTTCAGCAGGAATGC	TGCAGCAGCAGCGATTGGGGCCTCTGGGCACTCATGGCACTCCCCGCATG	JRXG01076311.1_scaffold-15278_1	75206	1	3.91E-18	12:G>A	12	0.991979	1	0.005391	0.994609	0	0.005391	0	0.010724	0.005362	8.20346	3	1	0	0	0	0	0	0	0	0	0	0	0	0	0	0	0	0	0	0	0	0	0	0	0	0	0	0	0	0	0
23110261|F|0-33:G>T-33:G>T	TGCAGCAGCAGCTGGGGTCTTGGGGCCATCCCTGCTCCCAGCTTCCCTGCATGAGCGGTTCAGCAGGAA	TGCAGCAGCAGCTGGGGTCTTGGGGCCATCCCTGCTCCCAGCTTCCCTGCATG	KN277894.1_scaffold-157	60626	1	9.08E-20	33:G>T	33	0.938503	0.951567	0.185185	0.814815	0.048433	0.136752	0.092175	0.301783	0.196979	7.60784	6.55682	1	0	0	2	2	-	0	0	2	2	0	0	0	0	1	0	1	2	2	2	0	0	0	0	0	2	1	0	0	0
23118585|F|0-9:A>C-9:A>C	TGCAGCAGCAGTGGCCTTGGGGCATGTTGTTCACCCTCCCCCTGTCTGCTCCTGGGGTGGCAAAGAACA	TGCAGCAGCAGTGGCCTTGGGGCATGTTGTTCACCCTCCCCCTGTCTGCTCCTGGGGTGGCAAAGAACA	KN281485.1_scaffold-5226	33983	1	1.84E-28	9:A>C	9	0.949198	0.994366	0.022535	0.977465	0.005634	0.016901	0.011204	0.044055	0.027629	3.28111	2.25	1	0	0	0	0	0	0	0	0	0	0	0	0	-	0	0	0	0	0	0	0	-	0	0	-	0	0	0	0	0
23112884|F|0-10:G>C-10:G>C	TGCAGCAGCAGTGGTCTTGCCATGCGGAGCTTAGCTGTCAGCTCCGCTCTGTTTTTTAGTGGTGCATGA	TGCAGCAGCAGTGGTCTTGCCATGCGGAGCTTAGCTGTCAGCTCCGCTCTGTTTTTTAGTGGTGCATGA	KN289223.1_scaffold-16305	364523	1	6.63E-28	10:G>C	10	1	1	0.002674	0.997326	0	0.002674	0	0.005333	0.002667	8.56838	5.5	1	0	0	0	0	0	0	0	0	0	0	0	0	0	0	0	0	0	0	0	0	0	0	0	0	0	0	0	0	0
23112893|F|0-25:C>A-25:C>A	TGCAGCAGCCAAGGGGAGCTCCAGGCTCTCTCAGGGTACAAGCCTGAGGGCTGCAAGGGAGCATGGTGG	TGCAGCAGCCAAGGGGAGCTCCAGGCTCTCTCAGGGTACAAGCCTGAGGGCTGCAAGGGAGCATGGTGG	JRXG01062793.1_scaffold-12389_1	11098	6	1.84E-28	25:C>A	25	0.994652	1	0.032258	0.967742	0	0.032258	0	0.062435	0.031217	6.53362	3.41667	1	0	0	0	0	0	0	0	0	0	0	0	0	0	0	0	0	0	0	0	0	0	0	0	0	0	0	0	0	0
23112902|F|0-14:G>A-14:G>A	TGCAGCAGCCATTAGGGCCTCTGGGGACTTGTGGCAGAGCCCCCTGCTCCATGCAGCATGAGCGGTTCA	TGCAGCAGCCATTAGGGCCTCTGGGGACTTGTGGCAGAGCCCCCTGCTCCATGCAGCATG	KN287601.1_scaffold-13997	83811	2	8.96E-11	14:G>A	14	1	0.721925	0.780749	0.219251	0.278075	0.502674	0.401498	0.34236	0.371929	8.62687	9.09341	1	0	2	2	2	0	2	0	0	1	0	2	1	1	1	2	2	1	2	2	0	2	0	0	0	2	2	2	2	1
23112903|F|0-7:G>A-7:G>A	TGCAGCAGCCCAAAGCCCAAGTGCCCTGAGGCACATCCCCGCCACCACCAACAGCATGAGCGGTTCAGC	TGCAGCAGCCCAAAGCCCAAGTGCCCTGAGGCACATCCCCGCCACCACCAACAGCATG		0	0	999	7:G>A	7	0.997326	1	0.037534	0.962466	0	0.037534	0	0.072249	0.036125	10.70601	6.31579	1	0	0	0	0	0	0	0	0	0	0	0	0	0	0	0	0	0	0	0	0	0	0	0	0	0	0	0	0	0
23112916|F|0-22:T>C-22:T>C	TGCAGCAGCGCACAAAGCCCAGTGCACAGCGGCAGCCACCACCACCCTGTGCACAGATCTGGGGGGCAC	TGCAGCAGCGCACAAAGCCCAGTGCACAGCGGCAGCCACCACCACCCTGTGCACAGATCTGGGGGGCAC	KN287474.1_scaffold-13802	77416	1	1.84E-28	22:T>C	22	0.997326	1	0.02681	0.97319	0	0.02681	0	0.052182	0.026091	9.37687	4.7	1	0	0	0	0	0	0	0	2	0	0	0	0	2	0	0	0	0	0	0	0	0	0	0	0	0	0	0	0	0
23112917|F|0-48:C>T-48:C>T	TGCAGCAGCGGCCCTCCGTTGCACCCGCACATGGATCCAGGGGGCATACGTCCCTCCCATGCTTGCCCA	TGCAGCAGCGGCCCTCCGTTGCACCCGCACATGGATCCAGGGGGCATACGTCCCTCCCATGCTTGCCCA	KN283629.1_scaffold-8274	120847	1	1.84E-28	48:C>T	48	1	0.997326	0.032086	0.967914	0.002674	0.029412	0.005333	0.062112	0.033723	10.01071	7	1	0	0	0	0	0	0	0	0	0	0	0	0	0	0	0	0	0	0	0	0	2	0	0	0	0	0	0	0	0
23112920|F|0-9:G>A-9:G>A	TGCAGCAGCGGTAGCAGCCGCCCTGCCCAGAAGCTGTGCGCTAGCCAGAGCTGTGGCCCTTCTGTGGGT	TGCAGCAGCGGTAGCAGCCGCCCTGCCCAGAAGCTGTGCGCTAGCCAGAGCTGTGGCCCTTCTGTGGGT	KN279604.1_scaffold-2584	155262	1	1.84E-28	9:G>A	9	1	1	0.008021	0.991979	0	0.008021	0	0.015914	0.007957	9.62393	3	1	0	0	0	0	0	0	0	0	0	0	0	0	0	0	0	0	0	0	0	0	0	0	0	0	0	0	0	0	0
23112928|F|0-11:G>A-11:G>A	TGCAGCAGCTCGCACCACGATGTGTTACCCTGTTAGACTCCTCCCTGTCAGCAGCATGAGCGGTTCAGC	TGCAGCAGCTCGCACCACGATGTGTTACCCTGTTAGACTCCTCCCTGTCAGCAGCATG	KN287290.1_scaffold-13533	26957	1	1.79E-22	11:G>A	11	1	0.997326	0.029412	0.970588	0.002674	0.026738	0.005333	0.057093	0.031213	10.01282	7.36364	1	0	0	0	0	0	0	0	0	0	2	0	0	0	0	0	0	0	0	0	0	0	0	0	0	0	0	0	0	0
23112931|F|0-21:G>C-21:G>C	TGCAGCAGCTGCCACACACAGGGCAGCTTGCCGTTGTTACCGTGCAACTGCAATTATGATTGCATGAGC	TGCAGCAGCTGCCACACACAGGGCAGCTTGCCGTTGTTACCGTGCAACTGCAATTATGATTGCATGAGC	KN282226.1_scaffold-6267	280336	1	8.58E-27	21:G>C	21	0.994652	1	0.002688	0.997312	0	0.002688	0	0.005362	0.002681	9.44731	3	1	0	0	0	0	0	0	0	0	0	0	0	0	0	0	0	0	0	0	0	0	0	0	0	0	0	0	0	0	0
23112933|F|0-50:G>A-50:G>A	TGCAGCAGCTGCTGCCTGTCTCAGCTGCCCTGGTGAAGGAGCACTTCACAGTGAACCCCAAGCGCATGA	TGCAGCAGCTGCTGCCTGTCTCAGCTGCCCTGGTGAAGGAGCACTTCACAGTGAACCCCAAGCGCATGA	KN292543.1_scaffold-21214	70509	1	6.63E-28	50:G>A	50	0.997326	1	0.002681	0.997319	0	0.002681	0	0.005348	0.002674	8.27897	3	1	0	0	0	0	0	0	0	0	0	0	0	0	0	0	0	0	0	0	0	0	0	0	0	0	0	0	0	0	0
23112935|F|0-20:C>A-20:C>A	TGCAGCAGCTGGGGGAGCTGCTTTCCACTGCTTCCTGGGGCTATATTCCCAGTTAAGTGCAGGTGTGTG	TGCAGCAGCTGGGGGAGCTGCTTTCCACTGCTTCCTGGGGCTATATTCCCAGTTAAGTGCAGGTGTGTG	KN292493.1_scaffold-21141	20634	1	1.84E-28	20:C>A	20	1	1	0.002674	0.997326	0	0.002674	0	0.005333	0.002667	10.0812	3	1	0	0	0	0	0	0	0	0	2	0	0	0	0	0	0	0	0	0	0	0	0	0	0	0	0	0	0	0	0
23112949|F|0-15:G>A-15:G>A	TGCAGCAGGAAGCCTGGTTGGCACGTGGAGTGTGGCTCTGGTCAGCCAGGCTCCAGTTTTGAGTGGTGC	TGCAGCAGGAAGCCTGGTTGGCACGTGGAGTGTGGCTCTGGTCAGCCAGGCTCCAGTTTTGAGTGGTGC	KN283514.1_scaffold-8107	203972	8	1.84E-28	15:G>A	15	0.997326	1	0.050938	0.949062	0	0.050938	0	0.096687	0.048344	8.46352	3.63636	1	0	0	0	0	2	0	0	0	2	0	0	0	0	0	0	2	0	0	0	0	0	0	0	0	0	0	0	2	0
23112957|F|0-68:C>G-68:C>G	TGCAGCAGGAAGTTGAGGGGGGCAGGGCACATTCACAGGCACAGGAACACAGAAACACCCATGAGCAAC	TGCAGCAGGAAGTTGAGGGGGGCAGGGCACATTCACAGGCACAGGAACACAGAAACACCCATGAGCAAC	KN279357.1_scaffold-2209	9660	1	1.84E-28	68:C>G	68	1	0.997326	0.069519	0.930481	0.002674	0.066845	0.005333	0.129372	0.067353	9.76759	4.26667	1	0	0	0	0	0	2	0	0	2	0	2	0	0	0	0	2	0	0	0	0	0	0	0	0	0	0	0	0	0
23112958|F|0-34:G>A-34:G>A	TGCAGCAGGAATGTGGGGGCACACAGATACAGACGCACATGAGCAGCCACAGCCTGCATGAGCGGTTCA	TGCAGCAGGAATGTGGGGGCACACAGATACAGACGCACATGAGCAGCCACAGCCTGCATG	KN279648.1_scaffold-2657	164558	1	1.47E-23	34:G>A	34	1	1	0.069519	0.930481	0	0.069519	0	0.129372	0.064686	11.40725	5.06452	1	0	0	0	0	0	0	0	0	0	0	2	0	0	0	0	0	0	0	0	0	2	0	0	0	0	0	2	0	0
23112960|F|0-23:C>T-23:C>T	TGCAGCAGGAGCACAAGCCAGCTCCCCCCCCCTCCCCCGCTGCTGCCTGTTGCAGGCTTGGGTGGGGCA	TGCAGCAGGAGCACAAGCCAGCTCCCCCCCCCTCCCCCGCTGCTGCCTGTTGCAGGCTTGGGTGGGGCA	KN278236.1_scaffold-626	36996	1	1.84E-28	23:C>T	23	0.981283	1	0.010899	0.989101	0	0.010899	0	0.021561	0.01078	5.93246	3	1	0	-	0	0	0	0	0	0	0	0	0	0	0	0	0	0	0	0	0	0	0	0	0	0	0	0	0	0	0
23112961|F|0-55:G>A-55:G>A	TGCAGCAGGAGCACAAGCCAGCTCCCCCTCTGCTGTAGGCTCAGGCAGGGCTGGTGCCTGGAGGTAGCA	TGCAGCAGGAGCACAAGCCAGCTCCCCCTCTGCTGTAGGCTCAGGCAGGGCTGGTGCCTGGAGGTAGCA	KN278097.1_scaffold-436	117077	1	8.58E-27	55:G>A	55	1	0.898396	0.564171	0.435829	0.101604	0.462567	0.182562	0.491764	0.337163	8.06235	6.70787	1	0	1	2	1	0	0	2	0	1	2	2	0	2	2	0	0	2	2	0	1	2	1	2	0	2	0	2	1	2
23112962|F|0-38:A>G-38:A>G	TGCAGCAGGAGCACACACATGCAACAAGGTCAAGGAGCAAGTTCCCAGGGTTTTTCCCCACTCCCGCTG	TGCAGCAGGAGCACACACATGCAACAAGGTCAAGGAGCAAGTTCCCAGGGTTTTTCCCCACTCCCGCTG	KN279593.1_scaffold-2565	248089	1	1.84E-28	38:A>G	38	0.986631	0.99729	0.075881	0.924119	0.00271	0.073171	0.005405	0.140246	0.072826	7.53579	4.71053	1	0	0	0	0	0	0	0	0	0	0	0	0	0	0	0	0	0	0	0	0	0	0	0	0	0	0	0	0	0
23112974|F|0-15:G>A-15:G>A	TGCAGCAGGCAGCCCGCCTCTGCCTCTCACACAAATCCTGGGGAGCATGTGCCTGCATGAGCGGTTCAG	TGCAGCAGGCAGCCCGCCTCTGCCTCTCACACAAATCCTGGGGAGCATGTGCCTGCATG	KN281979.1_scaffold-5915	128742	1	5.12E-23	15:G>A	15	0.997326	1	0.029491	0.970509	0	0.029491	0	0.057242	0.028621	8.98069	5.08333	1	0	0	0	0	0	0	0	0	0	0	2	0	0	0	0	0	0	0	0	0	0	0	0	0	0	0	0	0	0
23112975|F|0-52:T>C-52:T>C	TGCAGCAGGCAGCCTACACACTCCCTGCGCACAGATCTGGGGGGCATGGGACTGCTTTGGCTTCCCAGG	TGCAGCAGGCAGCCTACACACTCCCTGCGCACAGATCTGGGGGGCATGGGACTGCTTTGGCTTCCCAGG	KN278906.1_scaffold-1576	28373	1	1.84E-28	52:T>C	52	1	0.997326	0.037433	0.962567	0.002674	0.034759	0.005333	0.072064	0.038699	10.84582	6.41176	1	0	0	0	0	0	0	0	0	0	0	0	0	0	0	0	0	0	0	0	0	0	0	0	0	0	0	0	0	0
23112983|F|0-20:A>T-20:A>T	TGCAGCAGGCAGTGCCATATATACACATTCATATGCATGAGCGGTTCAGCAGGAATGCCGAGACCGATC	TGCAGCAGGCAGTGCCATATATACACATTCATATGCATG	KN278812.1_scaffold-1445	141510	1	2.85E-12	20:A>T	20	0.986631	1	0.00271	0.99729	0	0.00271	0	0.005405	0.002703	10.24401	3	1	0	0	0	0	0	0	0	0	0	0	0	0	0	0	0	0	0	0	0	0	0	0	0	0	0	0	0	0	0
23112989|F|0-22:T>G-22:T>G	TGCAGCAGGCTGCATTATGTTCTGCAAGCAGGCTCACTGCCTCTGGTCTACCTCTTCAACGTCTGGCTT	TGCAGCAGGCTGCATTATGTTCTGCAAGCAGGCTCACTGCCTCTGGTCTACCTCTTCAACGTCTGGCTT	JRXG01043798.1_scaffold-8464_1	54729	1	1.84E-28	22:T>G	22	0.991979	1	0.002695	0.997305	0	0.002695	0	0.005376	0.002688	6.18319	3	1	0	0	0	0	0	0	0	0	0	0	2	0	0	0	0	0	0	0	0	0	0	0	0	0	0	0	0	0	0
23112999|F|0-48:C>T-48:C>T	TGCAGCAGGGAGAAGGAGAGGGAGGGGGCACGCACAGACACAGACACACACGAGCAGTCGTAGGCTGCA	TGCAGCAGGGAGAAGGAGAGGGAGGGGGCACGCACAGACACAGACACACACGAGCAGTCGTAGGCTGCA	KN279632.1_scaffold-2629	90760	1	1.84E-28	48:C>T	48	0.76738	0.989547	0.020906	0.979094	0.010453	0.010453	0.020687	0.040938	0.030813	5.54108	4	1	-	0	0	0	-	0	-	0	0	0	0	0	0	-	0	-	0	0	-	-	0	-	-	-	-	0	-	0	0
23113004|F|0-27:A>G-27:A>G	TGCAGCAGGGAGCGTGGCATGGTTCTGACCAGCCAGGCTCCAGTTTTGGGTGGTGCATGAGCGGTTCAG	TGCAGCAGGGAGCGTGGCATGGTTCTGACCAGCCAGGCTCCAGTTTTGGGTGGTGCATG	KN287815.1_scaffold-14303	1264	1	5.12E-23	27:A>G	27	1	1	0.013369	0.986631	0	0.013369	0	0.026381	0.01319	9.63889	3.2	1	0	0	0	0	0	0	0	0	0	0	0	0	0	0	0	0	0	0	0	0	0	0	0	0	0	0	0	0	0
23113015|F|0-51:C>A-51:C>A	TGCAGCAGGGGGGGTTTGGGGGTCAGGTGAAAAGACAGACAGATGAGCAGCCGTAGCCACAGCATGAGC	TGCAGCAGGGGGGGTTTGGGGGTCAGGTGAAAAGACAGACAGATGAGCAGCCGTAGCCACAGCATGAGC	KN290773.1_scaffold-18600	15715	1	8.58E-27	51:C>A	51	1	0.991979	0.082888	0.917112	0.008021	0.074866	0.015914	0.152035	0.083974	7.45905	4.26316	1	2	0	0	0	0	2	2	0	0	0	2	0	0	0	0	0	0	0	0	0	0	0	0	0	0	0	0	0	0
23113017|F|0-34:G>A-34:G>A	TGCAGCAGGGGTCTCAGGCATGAGGTGCAACAGCGTGAGGGAATCCACAGAGCATGAGCGGTTCAGCAG	TGCAGCAGGGGTCTCAGGCATGAGGTGCAACAGCGTGAGGGAATCCACAGAGCATG	KN284399.1_scaffold-9377	107823	1	2.17E-21	34:G>A	34	1	0.989305	0.165775	0.834225	0.010695	0.15508	0.021162	0.276588	0.148875	10.84698	6.63415	1	0	0	0	0	0	0	0	2	0	0	0	0	1	0	2	0	2	2	2	2	0	0	0	0	0	0	0	0	2
23113018|F|0-16:G>A-16:G>A	TGCAGCAGGGTACAGCGTCAGCTACCTTCCCCAGGCACAAGTCAGCCCTTGAACACCTTTATCCACTTC	TGCAGCAGGGTACAGCGTCAGCTACCTTCCCCAGGCACAAGTCAGCCCTTGAACACCTTTATCCACTTC	KN289036.1_scaffold-16047	165898	1	1.84E-28	16:G>A	16	0.981283	1	0.008174	0.991826	0	0.008174	0	0.016215	0.008108	6.10088	3	1	0	0	0	0	0	0	0	0	0	0	0	0	0	0	0	0	0	0	0	0	0	0	0	0	0	0	0	0	0
23113035|F|0-51:G>A-51:G>A	TGCAGCAGTAACCTGCCCTTACCCTGTACACAGATCCAGGGGGCACCTCCCGCCCATGCTTGCTGGGGA	TGCAGCAGTAACCTGCCCTTACCCTGTACACAGATCCAGGGGGCACCTCCCGCCCATGCTTGCTGGGGA	KN285057.1_scaffold-10308	51057	1	1.84E-28	51:G>A	51	1	1	0.005348	0.994652	0	0.005348	0	0.010638	0.005319	9.45203	5	1	0	0	0	0	0	0	0	0	0	0	0	0	0	0	0	0	0	0	0	0	0	0	0	0	0	0	0	0	0
23113038|F|0-39:C>T-39:C>T	TGCAGCAGTAGAGTGAATCCCAGGTCACAGAATTACTTCCTGGAGGGGGAGAATGGGAACAGTGCATGA	TGCAGCAGTAGAGTGAATCCCAGGTCACAGAATTACTTCCTGGAGGGGGAGAATGGGAACAGTGCATGA	KN280578.1_scaffold-3947	3806	1	6.63E-28	39:C>T	39	1	0.975936	0.264706	0.735294	0.024064	0.240642	0.04697	0.389273	0.218122	9.33987	5.33333	1	0	0	0	0	0	0	0	2	0	0	0	2	0	2	2	2	0	0	2	2	0	2	1	0	0	0	0	2	2
23113039|F|0-6:A>G-6:A>G	TGCAGCAGTAGCCTGCCCGCACCCGGCACACAGATCCGGGGGTTCACCTCCCCGCCCCCATGCCCTCCT	TGCAGCAGTAGCCTGCCCGCACCCGGCACACAGATCCGGGGGTTCACCTCCCCGCCCCCATGCCCTCCT	KN285979.1_scaffold-11635	94032	1	1.84E-28	6:A>G	6	1	0.983957	0.176471	0.823529	0.016043	0.160428	0.031571	0.290657	0.161114	8.46537	5.67073	1	0	0	0	0	0	0	0	0	0	0	0	0	0	0	0	0	0	0	0	0	0	0	0	0	0	0	0	0	0
23113042|F|0-59:C>T-59:C>T	TGCAGCAGTAGTGAGGGAGGGAGTGGGGCTGGGGCAGGGCCCGCACAGCCTGAGCCAGGCGCAAGATGG	TGCAGCAGTAGTGAGGGAGGGAGTGGGGCTGGGGCAGGGCCCGCACAGCCTGAGCCAGGCGCAAGATGG	KN287443.1_scaffold-13759	17165	4	1.84E-28	59:C>T	59	1	1	0.008021	0.991979	0	0.008021	0	0.015914	0.007957	7.14133	4.25	1	0	0	0	0	0	0	0	0	0	0	0	0	0	0	0	0	0	0	0	0	0	0	0	0	0	0	0	0	0
23113043|F|0-28:C>T-28:C>T	TGCAGCAGTAGTGAGGGAGGTAGCAGAGCTGGAGCAGGGGCAGGACAGAACCATGAGTGGCTCATCCAG	TGCAGCAGTAGTGAGGGAGGTAGCAGAGCTGGAGCAGGGGCAGGACAGAACCATGAGTGGCTCATCCAG	KN289396.1_scaffold-16564	34064	1	1.84E-28	28:C>T	28	0.965241	1	0.00277	0.99723	0	0.00277	0	0.005525	0.002762	5.53061	3	1	0	0	0	0	0	0	0	0	0	0	0	0	0	0	0	0	0	0	0	0	0	0	0	0	0	0	0	0	-
23113049|F|0-20:T>C-20:T>C	TGCAGCAGTCACAGTTAACTTTGTTCCAACGAGTAGGCATAAATTCAGCATGATTTTATATCGTGTCAT	TGCAGCAGTCACAGTTAACTTTGTTCCAACGAGTAGGCATAAATTCAGCATGATTTTATATCGTGTCAT	KN278629.1_scaffold-1206	499887	1	1.84E-28	20:T>C	20	0.989305	1	0.002703	0.997297	0	0.002703	0	0.005391	0.002695	7.19957	3	1	0	0	0	0	0	0	0	0	0	0	0	0	0	0	0	0	0	0	0	0	0	0	0	0	0	0	0	0	0
23113053|F|0-34:G>A-34:G>A	TGCAGCAGTCGCCAGCTGCGTGGGGGGCTGTAGTGAGAAACGACCCCTGCCCGGGGTCACCGCCCAGAC	TGCAGCAGTCGCCAGCTGCGTGGGGGGCTGTAGTGAGAAACGACCCCTGCCCGGGGTCACCGCCCAGAC	KN283394.1_scaffold-7941	8333	1	1.84E-28	34:G>A	34	0.997326	0.997319	0.016086	0.983914	0.002681	0.013405	0.005348	0.031654	0.018501	8.78326	3.75	1	0	0	0	0	0	0	0	0	0	0	0	0	0	2	0	0	0	0	0	0	0	0	0	0	0	0	0	0	0
23113080|F|0-66:C>T-66:C>T	TGCAGCAGTGGCAGCAGCACCAGCAGCCCCACCCAGAAGCTGTGCGCTGGCTGGGCTGGGCTGGGCCCT	TGCAGCAGTGGCAGCAGCACCAGCAGCCCCACCCAGAAGCTGTGCGCTGGCTGGGCTGGGCTGGGCCCT	KN292707.1_scaffold-21442	112810	2	1.84E-28	66:C>T	66	1	1	0.02139	0.97861	0	0.02139	0	0.041866	0.020933	6.74518	3.75	1	0	0	0	0	0	0	0	0	0	0	0	0	0	0	0	0	0	0	0	0	0	0	0	0	0	0	0	0	0
23113081|F|0-21:C>T-21:C>T	TGCAGCAGTGGCAGCAGTGTCCCCATCTGGAAGCTGTGCATGAGCGGTTCAGCAGGAATGCCGAGACCG	TGCAGCAGTGGCAGCAGTGTCCCCATCTGGAAGCTGTGCATG	KN283548.1_scaffold-8156	82309	1	7.45E-14	21:C>T	21	1	0.973262	0.165775	0.834225	0.026738	0.139037	0.052046	0.276588	0.164317	12.73085	7.17333	1	0	0	0	0	0	0	0	0	0	0	0	0	0	0	0	0	0	0	0	0	0	0	0	0	0	0	0	0	0
23113083|F|0-35:C>T-35:C>T	TGCAGCAGTGGCATTAGTAGCTTCCCCCTGGAAGCCGAGTGTCCTGGCTGGGTCTGAGGCCCTCTGGCA	TGCAGCAGTGGCATTAGTAGCTTCCCCCTGGAAGCCGAGTGTCCTGGCTGGGTCTGAGGCCCTCTGGCA	KN293503.1_scaffold-22661	70110	1	1.84E-28	35:C>T	35	1	0.997326	0.024064	0.975936	0.002674	0.02139	0.005333	0.04697	0.026152	7.85837	4.61538	1	0	0	0	0	0	0	0	0	0	0	0	0	0	0	0	0	1	2	0	0	0	0	0	0	0	0	0	0	0
23113086|F|0-29:C>A-29:C>A	TGCAGCAGTGGCGATTCTGCTGCTTGGAGCCTGGCCAGCAGCCTCAGTGCAGTTCTGGGAGGCCCTGCT	TGCAGCAGTGGCGATTCTGCTGCTTGGAGCCTGGCCAGCAGCCTCAGTGCAGTTCTGGGAGGCCCTGCT	KN291738.1_scaffold-20020	410767	1	1.84E-28	29:C>A	29	1	1	0.005348	0.994652	0	0.005348	0	0.010638	0.005319	7.2265	5	1	0	0	0	0	0	0	0	0	0	0	0	0	0	0	0	0	0	0	0	0	0	0	0	0	0	0	0	0	0
23113088|F|0-5:C>T-5:C>T	TGCAGCAGTGGCTCCTCCTGCTCTTGCTGTGCTGCTCTGGGTGGGGGGAAAGCTTCATCTAGCAGGTCC	TGCAGCAGTGGCTCCTCCTGCTCTTGCTGTGCTGCTCTGGGTGGGGGGAAAGCTTCATCTAGCAGGTCC	KN292019.1_scaffold-20448	49919	1	1.84E-28	5:C>T	5	1	1	0.002674	0.997326	0	0.002674	0	0.005333	0.002667	11.45299	3	1	0	0	0	0	0	0	0	0	0	0	0	0	0	0	0	0	0	0	0	0	0	0	0	0	0	0	0	0	0
23113089|F|0-24:G>A-24:G>A	TGCAGCAGTGGGGAGGGGGTGCCTGTATGGTACAGTAGGGGGAGCATCCGTTTAGCATGAGCGGTTCAG	TGCAGCAGTGGGGAGGGGGTGCCTGTATGGTACAGTAGGGGGAGCATCCGTTTAGCATG	KN293647.1_scaffold-22880	35063	1	5.12E-23	24:G>A	24	1	1	0.005348	0.994652	0	0.005348	0	0.010638	0.005319	12.94883	7	1	0	0	0	0	0	0	0	0	0	0	0	0	0	0	0	0	0	0	0	0	0	0	0	0	0	0	0	0	0
23113094|F|0-31:T>A-31:T>A	TGCAGCAGTGGTGATTCTGCCGCATGGAGCCTGGCTGACAGTGGAGCACAGCTCTGGCTGGGTAGGCTC	TGCAGCAGTGGTGATTCTGCCGCATGGAGCCTGGCTGACAGTGGAGCACAGCTCTGGCTGGGTAGGCTC	KN279924.1_scaffold-3038	4208	2	4.02E-20	31:T>A	31	1	1	0.005348	0.994652	0	0.005348	0	0.010638	0.005319	8.20469	4.5	1	0	0	0	0	0	0	0	0	0	0	0	0	0	0	0	0	0	0	0	0	0	0	0	0	0	0	0	0	0
23113103|F|0-13:C>T-13:C>T	TGCAGCAGTTCCACGAGCCCTGAGGACTTTCCCAGTGAGCGTGATAACATGCTACGAGGCAAAAGTGGA	TGCAGCAGTTCCACGAGCCCTGAGGACTTTCCCAGTGAGCGTGATAACATGCTACGAGGCAAAAGTGGA	KN290556.1_scaffold-18291	22103	1	1.84E-28	13:C>T	13	0.983957	1	0.002717	0.997283	0	0.002717	0	0.00542	0.00271	6.71242	4	1	0	0	0	0	-	0	0	0	0	0	0	0	0	0	0	0	0	0	0	0	0	0	0	0	0	0	0	-	0
23113104|F|0-5:C>G-5:C>G	TGCAGCAGTTGCTCTCCAGGCTACCTGGACGCCATGTGCATGTGTTGCATGAGCGGTTCAGCAGGAATG	TGCAGCAGTTGCTCTCCAGGCTACCTGGACGCCATGTGCATGTGTTGCATG	KN286597.1_scaffold-12547	186638	1	1.09E-18	5:C>G	5	1	1	0.005348	0.994652	0	0.005348	0	0.010638	0.005319	11.94243	4.33333	1	0	0	0	0	0	0	0	0	0	0	0	0	0	0	0	0	0	0	0	0	0	0	2	0	0	0	0	0	0
23113110|F|0-26:G>A-26:G>A	TGCAGCAGTTTGCAGCTGTACCCAGAGCTTGTGCCCAGCATGAGCGGTTCAGCAGGAATGCCGAGACCG	TGCAGCAGTTTGCAGCTGTACCCAGAGCTTGTGCCCAGCATG	KN288577.1_scaffold-15384	139944	1	7.45E-14	26:G>A	26	0.997326	1	0.018767	0.981233	0	0.018767	0	0.036829	0.018415	10.8137	5.875	1	0	0	0	0	0	0	0	0	0	0	0	0	0	0	0	0	0	0	0	0	0	0	0	0	0	0	0	0	0
23113121|F|0-24:G>C-24:G>C	TGCAGCATACCTTTATACTTACCAGTCACCAGGCCCCCAGGGATCATTTTCTGTCAACTGCATGAGCGG	TGCAGCATACCTTTATACTTACCAGTCACCAGGCCCCCAGGGATCATTTTCTGTCAACTGCATG	KN288315.1_scaffold-15009	6481	1	9.81E-26	24:G>C	24	0.983957	1	0.01087	0.98913	0	0.01087	0	0.021503	0.010751	8.08734	4.2	1	0	0	0	0	0	0	0	0	0	0	0	0	0	0	0	0	0	0	0	0	0	0	0	0	0	0	0	0	0
23113124|F|0-9:G>A-9:G>A	TGCAGCATAGAGACTAAGCTGAATATGTCAGAAAATAGGACCCGGGAGATGCCTCCACTGCTGCTATGG	TGCAGCATAGAGACTAAGCTGAATATGTCAGAAAATAGGACCCGGGAGATGCCTCCACTGCTGCTATGG	KN293017.1_scaffold-21929	82889	1	1.84E-28	9:G>A	9	0.97861	0.991803	0.071038	0.928962	0.008197	0.062842	0.016259	0.131984	0.074121	5.1766	4.33333	1	0	0	0	0	0	0	0	0	0	0	0	0	0	0	0	0	0	0	0	0	0	0	0	0	0	0	0	2	0
23113126|F|0-14:T>C-14:T>C	TGCAGCATAGCAGCTGGGGCAAGGCCAACCCAGCTGCCAATCCCCTAAGTAATTCTGTAGTGAAGACAA	TGCAGCATAGCAGCTGGGGCAAGGCCAACCCAGCTGCCAATCCCCTAAGTAATTCTGTAGTGAAGACAA	KN288348.1_scaffold-15064	26051	1	1.84E-28	14:T>C	14	0.983957	0.994565	0.040761	0.959239	0.005435	0.035326	0.01081	0.078199	0.044505	4.99338	3.77778	1	0	0	0	0	0	0	0	0	0	0	0	0	-	0	0	0	0	0	0	0	0	0	0	-	0	0	0	0	0
23113131|F|0-5:C>A-5:C>A	TGCAGCATAGGTAGGACATACAAAGTGGGGGAACATGAAACTAGTGCATGAGCGGTTCAGCAGGAATGC	TGCAGCATAGGTAGGACATACAAAGTGGGGGAACATGAAACTAGTGCATG	KN293920.1_scaffold-23284	176885	1	1.82E-16	5:C>A	5	0.986631	0.97832	0.135501	0.864499	0.02168	0.113821	0.04242	0.234281	0.138351	11.89845	6.83333	1	0	0	0	0	0	0	0	0	2	0	0	0	0	0	0	0	0	0	0	0	1	0	0	0	2	0	2	0	2
23113136|F|0-49:C>A-49:C>A	TGCAGCATATCTCTTGCTCCTGCTTGCGTGTGTAAGCCGTGGACTGGGACGCAGGGGCATGAGCGGTTC	TGCAGCATATCTCTTGCTCCTGCTTGCGTGTGTAAGCCGTGGACTGGGACGCAGGGGCATG	KN287396.1_scaffold-13690	189496	1	4.20E-24	49:C>A	49	1	0.802139	0.540107	0.459893	0.197861	0.342246	0.317424	0.496783	0.407103	7.83511	6.4549	1	0	0	0	0	0	0	0	2	2	0	0	2	2	2	0	1	0	0	0	0	1	0	0	0	2	2	2	0	0
23113147|F|0-68:T>A-68:T>A	TGCAGCATCACATTAATGGCTTATGTTTATCTTGTGGTCAATCATGGCCCCCACATCCCTTTCGTCCAT	TGCAGCATCACATTAATGGCTTATGTTTATCTTGTGGTCAATCATGGCCCCCACATCCCTTTCGTCCAT	KN279275.1_scaffold-2102	11388	5	1.84E-28	68:T>A	68	0.986631	0.99187	0.051491	0.948509	0.00813	0.04336	0.016128	0.097678	0.056903	5.84902	2.65	1	0	0	0	0	0	0	0	0	0	0	0	0	0	0	2	0	0	0	0	0	0	0	0	0	0	0	0	0	0
23113164|F|0-42:T>A-42:T>A	TGCAGCATCAGCTGTTTCACCAGCTCCACCATGTTGCCCAGCTGCCTGTTGGGCCGCAGGTTCGCATGA	TGCAGCATCAGCTGTTTCACCAGCTCCACCATGTTGCCCAGCTGCCTGTTGGGCCGCAGGTTCGCATGA		0	0	999	42:T>A	42	0.991979	0.997305	0.02965	0.97035	0.002695	0.026954	0.005376	0.057541	0.031459	7.10799	3.8	1	0	0	0	0	0	0	0	0	0	0	0	0	0	0	0	0	0	0	0	0	0	0	0	0	0	0	0	0	0
23113169|F|0-28:A>G-28:A>G	TGCAGCATCATACTGAAGGCTCACATTCATCTTGTGGTCAGTCATGACTCCCAAGTCCCTTTCATCCGT	TGCAGCATCATACTGAAGGCTCACATTCATCTTGTGGTCAGTCATGACTCCCAAGTCCCTTTCATCCGT	JRXG01069958.1_scaffold-13888_1	315	10	1.84E-28	28:A>G	28	0.986631	1	0.00813	0.99187	0	0.00813	0	0.016128	0.008064	8.07974	3.5	1	0	0	-	0	0	0	0	0	0	0	0	0	0	0	0	0	0	0	0	0	0	0	0	0	0	0	0	0	0
23113187|F|0-51:G>A-51:G>A	TGCAGCATCCGGCAGCTGAAGGAACGCGTAGCAAACTTGCGCCTGAAACACGACCAGATCTACAACTTC	TGCAGCATCCGGCAGCTGAAGGAACGCGTAGCAAACTTGCGCCTGAAACACGACCAGATCTACAACTTC	KN284332.1_scaffold-9281	257222	1	1.84E-28	51:G>A	51	0.965241	1	0.01108	0.98892	0	0.01108	0	0.021915	0.010958	4.15247	3	1	-	0	0	0	0	0	0	0	0	0	0	0	0	0	0	0	0	0	0	0	0	0	0	-	0	0	0	0	0
23113190|F|0-29:A>G-29:A>G	TGCAGCATCCTTATAGGCTTGGGCGTGCTACGCTGGCTAGCACTATTGAAGAAAGAGACTTGAGCGTTA	TGCAGCATCCTTATAGGCTTGGGCGTGCTACGCTGGCTAGCACTATTGAAGAAAGAGACTTGAGCGTTA	KN289869.1_scaffold-17280	302464	1	1.45E-19	29:A>G	29	0.997326	1	0.002681	0.997319	0	0.002681	0	0.005348	0.002674	7.82051	5	1	0	0	0	0	0	0	0	0	0	0	0	0	0	0	0	0	0	0	0	0	0	0	0	0	0	0	0	0	0
23113200|F|0-5:C>T-5:C>T	TGCAGCATCTCCTGCACTGGGCACACGCGTGTGCACATGGAGCGCCACTGTGCGGGGGGAGGGATGGCA	TGCAGCATCTCCTGCACTGGGCACACGCGTGTGCACATGGAGCGCCACTGTGCGGGGGGAGGGATGGCA	KN282172.1_scaffold-6189	227822	1	1.84E-28	5:C>T	5	1	0.983957	0.192513	0.807487	0.016043	0.176471	0.031571	0.310904	0.171237	9.04957	5.53409	1	2	0	0	0	0	0	0	0	0	0	0	0	0	2	0	0	0	0	0	0	1	0	2	0	0	0	0	0	0
23113220|F|0-58:C>G-58:C>G	TGCAGCATGGCAGGTCTGCTGGACTTCAGGGTCGGAGCCCCCGAAGCGTATACGAGGACAGCATGAGCG	TGCAGCATGGCAGGTCTGCTGGACTTCAGGGTCGGAGCCCCCGAAGCGTATACGAGGACAGCATG	KN287979.1_scaffold-14542	121644	3	2.80E-26	58:C>G	58	1	0.989305	0.05615	0.94385	0.010695	0.045455	0.021162	0.105994	0.063578	10.92888	6.44444	1	0	0	0	0	0	0	0	0	0	0	0	0	0	0	0	0	0	0	0	0	0	0	0	0	0	0	0	0	0
23113224|F|0-39:G>A-39:G>A	TGCAGCATGGCTCCAGGTGGCCCGGCTCCACTTTTCAGCGGCATGAGCGGTTCAGCAGGAATGCCGAGA	TGCAGCATGGCTCCAGGTGGCCCGGCTCCACTTTTCAGCGGCATG	KN291403.1_scaffold-19539	196534	4	1.88E-15	39:G>A	39	0.994652	0.994624	0.013441	0.986559	0.005376	0.008065	0.010695	0.02652	0.018608	8.54545	3.83333	1	0	0	0	0	0	0	0	0	0	0	0	0	0	0	0	0	0	0	0	0	0	0	0	0	0	0	0	0	0
23113225|F|0-13:C>T-13:C>T	TGCAGCATGGCTCCAGGTGGCCTAGCTCCGCTTTTGAGCAGCACACGGTCACTGCCTGTGCATGAGCGG	TGCAGCATGGCTCCAGGTGGCCTAGCTCCGCTTTTGAGCAGCACACGGTCACTGCCTGTGCATG	KN281013.1_scaffold-4530	78239	1	9.81E-26	13:C>T	13	1	0.991979	0.09893	0.90107	0.008021	0.090909	0.015914	0.178286	0.0971	9.59871	5.06522	1	0	0	0	0	0	0	0	0	0	0	0	0	0	0	0	0	0	0	0	0	0	0	0	2	0	0	0	0	0
23113226|F|0-49:G>A-49:G>A	TGCAGCATGGCTCTGAGTGGCCTGGCTACACTTTTTAACAGCACACGCTGCTCAAGCATGAGCGGTTCA	TGCAGCATGGCTCTGAGTGGCCTGGCTACACTTTTTAACAGCACACGCTGCTCAAGCATG	KN286675.1_scaffold-12656	97792	1	1.47E-23	49:G>A	49	1	1	0.018717	0.981283	0	0.018717	0	0.036733	0.018366	8.80128	5.42857	1	0	0	0	0	0	0	0	0	0	0	0	0	0	0	0	0	0	0	0	0	0	0	0	0	0	0	0	0	0
23113227|F|0-26:C>T-26:C>T	TGCAGCATGGCTGAAAGGGACCTATGCGAAATGATTGACCACCGCATGAATATGAGCTGTCAGTGCAGT	TGCAGCATGGCTGAAAGGGACCTATGCGAAATGATTGACCACCGCATGAATATGAGCTGTCAGTGCAGT	KN278757.1_scaffold-1369	25290	1	1.84E-28	26:C>T	26	0.983957	1	0.002717	0.997283	0	0.002717	0	0.00542	0.00271	6.10022	3	1	0	0	0	0	0	0	0	0	0	0	0	0	0	0	0	0	0	0	0	0	0	0	0	0	0	0	0	0	0
23113231|F|0-8:G>A-8:G>A	TGCAGCATGGGGGTCACCCTGGCTTTGCCCTTCTGCTCCCCATGCCAGATGCATGAGCGGTTCAGCAGG	TGCAGCATGGGGGTCACCCTGGCTTTGCCCTTCTGCTCCCCATGCCAGATGCATG	KN289939.1_scaffold-17388	114956	1	7.54E-21	8:G>A	8	0.994652	0.997312	0.034946	0.965054	0.002688	0.032258	0.005362	0.06745	0.036406	10.02597	6.66667	1	0	0	0	0	0	0	0	0	0	0	0	2	0	0	0	0	0	0	0	0	0	0	0	0	0	0	0	0	0
23113241|F|0-20:T>C-20:T>C	TGCAGCATGTCCACTGTTGATCAAGCAACCCAAAACAGCATCTCTTGCTCAATGCCACAGATAGTTCAA	TGCAGCATGTCCACTGTTGATCAAGCAACCCAAAACAGCATCTCTTGCTCAATGCCACAGATAGTTCAA	KN290867.1_scaffold-18730	338	6	1.84E-28	20:T>C	20	0.994652	1	0.002688	0.997312	0	0.002688	0	0.005362	0.002681	6.54176	3	1	0	2	0	0	0	0	0	0	0	0	0	0	0	0	0	0	0	0	0	0	0	0	0	0	0	0	0	0	0
23113243|F|0-17:G>C-17:G>C	TGCAGCATGTGAAAATAGCATGTGCCAGAACAAATGGAGACTTCATCCTTCAGTGCGACCCTCTGGCTG	TGCAGCATGTGAAAATAGCATGTGCCAGAACAAATGGAGACTTCATCCTTCAGTGCGACCCTCTGGCTG	KN293744.1_scaffold-23017	89742	1	1.84E-28	17:G>C	17	0.991979	0.989218	0.024259	0.975741	0.010782	0.013477	0.021331	0.047341	0.034336	5.47289	3.27273	1	0	0	0	0	0	0	0	0	0	0	0	0	0	0	0	0	0	0	0	0	0	0	0	0	0	0	0	0	0
23113248|F|0-22:C>T-22:C>T	TGCAGCATGTGGGGCAGGGGAGCAAGCCACCCTCAGCTGCCTACTTCCTTGTCTCCATATTTGTCCTGG	TGCAGCATGTGGGGCAGGGGAGCAAGCCACCCTCAGCTGCCTACTTCCTTGTCTCCATATTTGTCCTGG	KN279194.1_scaffold-1981	59354	1	1.84E-28	22:C>T	22	1	1	0.002674	0.997326	0	0.002674	0	0.005333	0.002667	8.72708	3	1	0	0	0	0	0	0	0	0	0	0	0	0	0	0	0	0	0	0	0	0	0	0	0	0	0	0	0	0	0
23113249|F|0-43:A>G-43:A>G	TGCAGCATGTGTGCCACAAGTGGCATGTGCAGCCTGCGTGTACAGCATGAGCGGTTCAGCAGGAATGCC	TGCAGCATGTGTGCCACAAGTGGCATGTGCAGCCTGCGTGTACAGCATG	KN278896.1_scaffold-1566	111893	1	1.35E-17	43:A>G	43	0.991979	0.959569	0.229111	0.770889	0.040431	0.188679	0.077593	0.353238	0.215415	11.61435	6.80952	1	0	0	0	2	0	0	0	2	0	0	0	0	2	0	0	0	1	1	0	0	0	0	0	0	0	2	0	2	0
23113250|F|0-37:T>C-37:T>C	TGCAGCATGTTAAGCCAGAAGGAGCAACCCCAGGTGATATGGGATCTTGGGATGTCAGCCTGCCAGCCA	TGCAGCATGTTAAGCCAGAAGGAGCAACCCCAGGTGATATGGGATCTTGGGATGTCAGCCTGCCAGCCA	KN283201.1_scaffold-7661	241948	1	8.58E-27	37:T>C	37	0.994652	0.150538	0.97043	0.02957	0.849462	0.120968	0.255752	0.057391	0.156572	6.92754	7.40667	1	1	1	1	1	1	1	1	1	1	1	1	1	1	1	1	1	1	1	1	1	1	1	1	1	1	1	1	2	1
23113262|F|0-49:A>G-49:A>G	TGCAGCATGTTTTCCCATCTACATCTCCATAGAGTTACAGCTCAGAAGCATTTTCCCTCTGCTCCACTG	TGCAGCATGTTTTCCCATCTACATCTCCATAGAGTTACAGCTCAGAAGCATTTTCCCTCTGCTCCACTG	KN280980.1_scaffold-4487	569557	1	8.58E-27	49:A>G	49	0.970588	0.997245	0.068871	0.931129	0.002755	0.066116	0.005494	0.128255	0.066875	7.74393	4.58621	1	0	0	0	0	0	0	0	0	0	0	0	0	0	0	0	0	0	0	0	0	0	0	0	0	0	0	0	0	0
23113274|F|0-66:C>T-66:C>T	TGCAGCATTGATGTGGGAGCTGAGGGCCCCTCTGACAGCCTGGCTGCTTCAACCGTTCCACTCCCACGA	TGCAGCATTGATGTGGGAGCTGAGGGCCCCTCTGACAGCCTGGCTGCTTCAACCGTTCCACTCCCACGA	KN278762.1_scaffold-1376	52381	1	1.84E-28	66:C>T	66	1	1	0.024064	0.975936	0	0.024064	0	0.04697	0.023485	9.1234	4.77778	1	0	0	0	0	0	0	0	0	0	0	0	0	0	0	0	0	0	0	0	0	0	0	0	0	0	0	0	0	0
23113279|F|0-33:G>A-33:G>A	TGCAGCATTGCTTCTCGACCCTCAGTGACAATGGAGAGGAACTCTTGTCTTTAACTTGTTCTCACATTC	TGCAGCATTGCTTCTCGACCCTCAGTGACAATGGAGAGGAACTCTTGTCTTTAACTTGTTCTCACATTC	KN282385.1_scaffold-6479	136264	1	1.84E-28	33:G>A	33	0.970588	0.997245	0.027548	0.972452	0.002755	0.024793	0.005494	0.053579	0.029537	5.7351	3.33333	1	0	0	2	0	0	0	0	0	0	0	0	0	0	0	0	0	0	0	0	0	0	-	0	0	0	0	0	0	0
23113286|F|0-39:C>T-39:C>T	TGCAGCATTGTGTACCTTTAAAAGTGCCTGGGGCTGCGGCGCATGAGCGGTTCAGCAGGAATGCCGAGA	TGCAGCATTGTGTACCTTTAAAAGTGCCTGGGGCTGCGGCGCATG	KN290669.1_scaffold-18448	5131	1	1.88E-15	39:C>T	39	0.954545	1	0.002801	0.997199	0	0.002801	0	0.005587	0.002793	5.87162	3	1	0	0	0	0	0	0	0	-	0	0	0	0	0	0	0	-	0	0	0	0	0	0	0	0	0	0	0	0	0
23113293|F|0-25:C>T-25:C>T	TGCAGCATTTCCCCAGGTGGTATCACGCTAGGAGCTGCGGGAGTCTGCATGAGCGGTTCAGCAGGAATG	TGCAGCATTTCCCCAGGTGGTATCACGCTAGGAGCTGCGGGAGTCTGCATG	KN292123.1_scaffold-20592	133985	1	1.09E-18	25:C>T	25	0.991979	1	0.002695	0.997305	0	0.002695	0	0.005376	0.002688	11.28326	4	1	0	0	0	0	0	0	0	0	0	0	0	0	0	0	0	0	0	0	0	0	0	0	0	0	0	0	0	0	0
23113296|F|0-16:G>A-16:G>A	TGCAGCATTTTAATTAGAGCGGCTCTCCAGGAACCACTCTAGTTAAAGCATGAGCGGTTCAGCAGGAAT	TGCAGCATTTTAATTAGAGCGGCTCTCCAGGAACCACTCTAGTTAAAGCATG	KN291448.1_scaffold-19597	120814	6	3.14E-19	16:G>A	16	0.989305	1	0.016216	0.983784	0	0.016216	0	0.031907	0.015953	7.65517	5.42857	1	0	0	0	0	0	0	0	0	0	0	0	0	0	0	0	0	0	0	0	0	0	0	0	0	0	0	0	0	0
23113304|F|0-49:C>G-49:C>G	TGCAGCCAAATGGCATGTGCCACCTGGGACCGATTTCTGCCTGCCTTAACCAGCATGAGCGGTTCAGCA	TGCAGCCAAATGGCATGTGCCACCTGGGACCGATTTCTGCCTGCCTTAACCAGCATG		0	0	999	49:C>G	49	1	1	0.631016	0.368984	0	0.631016	0	0.46567	0.232835	24.18085	11.46644	1	2	2	0	2	0	2	0	2	0	2	2	0	0	2	0	0	2	2	0	0	0	0	2	2	2	0	2	2	2
23113307|F|0-49:T>C-49:T>C	TGCAGCCAAATTTCTAAGCCCTGCAACCAGATGACATTGATGTGTGCATTGTCCAGCACTTGGGGCCAG	TGCAGCCAAATTTCTAAGCCCTGCAACCAGATGACATTGATGTGTGCATTGTCCAGCACTTGGGGCCAG	KN278442.1_scaffold-914	431595	1	1.84E-28	49:T>C	49	0.997326	0.975871	0.262735	0.737265	0.024129	0.238606	0.047093	0.38741	0.217252	9.34858	5.72	1	0	0	2	0	2	0	0	0	2	0	2	2	0	0	2	0	2	2	0	0	0	0	0	0	2	0	0	2	0
23113316|F|0-41:T>C-41:T>C	TGCAGCCAACCCCACGCAAATCCCACTTGCTCTTCTTCACATGCATGAGCGGTTCAGCAGGAATGCCGA	TGCAGCCAACCCCACGCAAATCCCACTTGCTCTTCTTCACATGCATG	KN286471.1_scaffold-12364	42439	1	1.60E-16	41:T>C	41	0.991979	0.997305	0.045822	0.954178	0.002695	0.043127	0.005376	0.087445	0.046411	10.90497	4.45	1	0	0	0	0	0	0	0	0	0	0	0	0	0	0	0	0	0	0	0	0	0	0	0	0	0	0	0	0	0
23113319|F|0-55:C>T-55:C>T	TGCAGCCAAGAAGCAGAGGGGAAGAGCCAGCCCTGCTGTGGAGCAGACAGCCCAGCCCAGAGAGCATGA	TGCAGCCAAGAAGCAGAGGGGAAGAGCCAGCCCTGCTGTGGAGCAGACAGCCCAGCCCAGAGAGCATGA	KN279891.1_scaffold-2992	256947	10	6.63E-28	55:C>T	55	1	1	0.002674	0.997326	0	0.002674	0	0.005333	0.002667	10.60213	3	1	0	0	0	0	0	0	0	0	0	0	0	0	0	0	0	0	0	0	0	0	0	0	0	0	0	0	0	0	0
23113323|F|0-12:G>A-12:G>A	TGCAGCCAAGGAGCAGAGGGGAGGGGCCAGTCCTGCTGTGAAGCAGAGAGCCCCACTCAGCCCTGAGAG	TGCAGCCAAGGAGCAGAGGGGAGGGGCCAGTCCTGCTGTGAAGCAGAGAGCCCCACTCAGCCCTGAGAG	KN289706.1_scaffold-17037	58426	10	1.84E-28	12:G>A	12	0.997326	0.997319	0.040214	0.959786	0.002681	0.037534	0.005348	0.077195	0.041271	8.71245	3.15	1	0	0	0	0	0	0	0	0	0	0	0	0	0	0	0	0	0	0	0	0	0	0	0	0	0	0	0	2	0
23113324|F|0-24:C>T-24:C>T	TGCAGCCAAGGCCCTCCTTCCCCACGTGTCTGTGCATGAGCGGTTCAGCAGGAATGCCGAGACCGATCT	TGCAGCCAAGGCCCTCCTTCCCCACGTGTCTGTGCATG	KN285410.1_scaffold-10827	144119	1	9.53E-12	24:C>T	24	0.991979	0.994609	0.016173	0.983827	0.005391	0.010782	0.010724	0.031822	0.021273	9.72473	6.71429	1	0	0	0	0	0	0	0	0	0	0	0	0	0	0	0	0	0	0	0	0	0	0	0	0	0	0	0	0	0
23113349|F|0-60:C>T-60:C>T	TGCAGCCACACCGGCTCCTGCCTCCATTGCCCCGAGCTCAGAGGCTTCATGGCCTCATTTCCTGCATGA	TGCAGCCACACCGGCTCCTGCCTCCATTGCCCCGAGCTCAGAGGCTTCATGGCCTCATTTCCTGCATGA	KN289218.1_scaffold-16300	373910	1	6.63E-28	60:C>T	60	1	1	0.013369	0.986631	0	0.013369	0	0.026381	0.01319	9.59362	5.375	1	0	0	0	0	0	0	0	0	0	0	0	0	0	0	0	0	0	0	0	0	0	0	0	0	0	0	0	0	0
23113351|F|0-20:G>C-20:G>C	TGCAGCCACAGAGCAGGGGGGAGGGGCCAGCCTTTCTGTGGAGTAGAGGACCCCGCCCAGCCCAGAGAG	TGCAGCCACAGAGCAGGGGGGAGGGGCCAGCCTTTCTGTGGAGTAGAGGACCCCGCCCAGCCCAGAGAG	KN290626.1_scaffold-18395	106380	2	1.84E-28	20:G>C	20	1	1	0.058824	0.941176	0	0.058824	0	0.110727	0.055363	8.7617	4.12	1	0	0	0	0	0	0	0	0	0	0	0	0	0	0	0	0	0	0	2	0	0	2	0	0	0	0	0	0	0
23113355|F|0-41:G>A-41:G>A	TGCAGCCACAGCCCACTGACAGCTGGCCCAGAGGGGCAGATGCCTCTGCTGTCTATGCAGTCCCCATCC	TGCAGCCACAGCCCACTGACAGCTGGCCCAGAGGGGCAGATGCCTCTGCTGTCTATGCAGTCCCCATCC	KN286294.1_scaffold-12098	193950	11	1.84E-28	41:G>A	41	1	0.989305	0.139037	0.860963	0.010695	0.128342	0.021162	0.239412	0.130287	7.12232	4.375	1	0	0	0	0	2	0	1	0	2	0	0	0	0	0	0	0	0	0	2	0	2	1	2	2	0	0	0	0	0
23113360|F|0-50:G>T-50:G>T	TGCAGCCACAGTGATCCTGCCAGGCAGAGTCTGGCTGGCAGCCTCAGTGTGGCTCGGAGTGGCCCAGCT	TGCAGCCACAGTGATCCTGCCAGGCAGAGTCTGGCTGGCAGCCTCAGTGTGGCTCGGAGTGGCCCAGCT	KN282345.1_scaffold-6423	31956	2	1.84E-28	50:G>T	50	1	0.983957	0.227273	0.772727	0.016043	0.21123	0.031571	0.35124	0.191405	8.22727	4.71154	1	0	0	0	0	0	0	0	2	2	0	0	0	0	2	0	0	0	0	0	0	0	0	0	0	0	0	2	0	0
23113361|F|0-23:G>A-23:G>A	TGCAGCCACAGTGATTCTGCTCCGTGGAGCTGGGCTGGCAATAGAGTGTGGCTCCAGGCAGCCTGGCTC	TGCAGCCACAGTGATTCTGCTCCGTGGAGCTGGGCTGGCAATAGAGTGTGGCTCCAGGCAGCCTGGCTC	KN287752.1_scaffold-14213	116676	1	1.84E-28	23:G>A	23	1	0.983957	0.144385	0.855615	0.016043	0.128342	0.031571	0.247076	0.139323	8.37744	5.11765	1	0	0	2	2	2	0	0	0	0	0	2	2	2	2	0	2	0	1	0	0	0	0	0	2	0	0	0	2	0
23113362|F|0-21:G>A-21:G>A	TGCAGCCACAGTGCTTGTGCAGCAGGGAGCCTGGCCCGCAGCCAGAGTGTGGCTCTAGCCAACCAGGCT	TGCAGCCACAGTGCTTGTGCAGCAGGGAGCCTGGCCCGCAGCCAGAGTGTGGCTCTAGCCAACCAGGCT	KN278163.1_scaffold-525	50395	2	1.84E-28	21:G>A	21	0.997326	0.997319	0.042895	0.957105	0.002681	0.040214	0.005348	0.082111	0.043729	6.29032	3.76471	1	0	0	0	0	0	0	0	0	0	0	0	0	0	0	0	0	0	0	0	0	0	0	0	0	0	2	0	0	0
23113365|F|0-43:T>C-43:T>C	TGCAGCCACCAACACATTCATGGGTGGATAACACTGATGCACATACTCACCGATACCCATGCTCACGCT	TGCAGCCACCAACACATTCATGGGTGGATAACACTGATGCACATACTCACCGATACCCATGCTCACGCT	KN288199.1_scaffold-14844	55386	1	1.84E-28	43:T>C	43	1	0.997326	0.032086	0.967914	0.002674	0.029412	0.005333	0.062112	0.033723	9.91471	3.35714	1	0	0	1	0	0	0	0	0	0	0	0	0	0	0	0	0	0	0	0	0	0	0	0	0	0	0	0	0	0
23113370|F|0-31:A>C-31:A>C	TGCAGCCACCAGGTCAACCCCAGGCAATTGAATGGAGCCTTGCAGCCACCAGTTCAATCCCAGGCATGA	TGCAGCCACCAGGTCAACCCCAGGCAATTGAATGGAGCCTTGCAGCCACCAGTTCAATCCCAGGCATGA	JRXG01083212.1_scaffold-16722_1	687	1	1.46E-14	31:A>C	31	1	1	0.034759	0.965241	0	0.034759	0	0.067102	0.033551	14.43683	4.125	1	0	0	0	0	0	0	0	0	0	0	0	0	0	0	0	0	0	0	0	0	0	0	0	0	0	0	0	0	0
23113372|F|0-55:C>T-55:C>T	TGCAGCCACCCAGAGCCCATGCCATGTCAGGCTGCCCTGCATCTCCTGGCAAATCCGGAGAAGGTGTGG	TGCAGCCACCCAGAGCCCATGCCATGTCAGGCTGCCCTGCATCTCCTGGCAAATCCGGAGAAGGTGTGG	KN286328.1_scaffold-12147	77271	1	1.84E-28	55:C>T	55	0.973262	1	0.005495	0.994505	0	0.005495	0	0.010929	0.005464	4.42793	2	1	0	0	0	0	-	0	0	0	0	0	0	0	0	0	0	0	0	0	0	0	0	0	0	0	0	0	0	-	0
23113374|F|0-27:G>A-27:G>A	TGCAGCCACCCATTTCAACTGCCACACGGGCATCCCCCTGTCTGCTGGACTTGGCATGAGCGGTTCAGC	TGCAGCCACCCATTTCAACTGCCACACGGGCATCCCCCTGTCTGCTGGACTTGGCATG	KN292400.1_scaffold-21014	397361	1	1.79E-22	27:G>A	27	0.997326	0.997319	0.002681	0.997319	0.002681	0	0.005348	0.005348	0.005348	8.11563	7	1	0	0	0	0	0	0	0	0	0	0	0	0	0	0	0	0	0	0	0	0	0	0	0	0	0	0	0	1	0
23113381|F|0-34:G>A-34:G>A	TGCAGCCACGAGGCACAGGGACTGACCCCAGGGTGTGGTGCACAGCATGAGCGGTTCAGCAGGAATGCC	TGCAGCCACGAGGCACAGGGACTGACCCCAGGGTGTGGTGCACAGCATG	KN281381.1_scaffold-5083	8328	1	1.35E-17	34:G>A	34	0.997326	0.876676	0.453083	0.546917	0.123324	0.329759	0.216231	0.495598	0.355914	14.37831	10.19524	1	1	2	0	0	0	0	2	0	2	2	0	2	1	0	2	0	2	2	0	2	0	0	0	0	2	0	0	2	0
23113384|F|0-8:C>T-8:C>T	TGCAGCCACGGTGATCCTTCTGGGCAGGGTCTGGTCGGCAGCCACAGCACAATTCTAGGTGGCCCAGCT	TGCAGCCACGGTGATCCTTCTGGGCAGGGTCTGGTCGGCAGCCACAGCACAATTCTAGGTGGCCCAGCT	KN292518.1_scaffold-21171	139768	1	1.84E-28	8:C>T	8	1	1	0.02139	0.97861	0	0.02139	0	0.041866	0.020933	9.01064	4	1	0	0	0	0	0	2	0	0	0	0	0	0	0	0	0	0	0	0	0	0	0	0	0	0	0	0	0	0	0
23113399|F|0-23:C>T-23:C>T	TGCAGCCACTGGGCTGCACTGTGCTTTGCCGGTGTCGTTTCTCACCCCCCAGTGCATGAGCGGTTCAGC	TGCAGCCACTGGGCTGCACTGTGCTTTGCCGGTGTCGTTTCTCACCCCCCAGTGCATG	KN289395.1_scaffold-16561	400903	1	1.79E-22	23:C>T	23	0.997326	1	0.024129	0.975871	0	0.024129	0	0.047093	0.023546	11.13006	6.22222	1	0	0	0	0	0	0	0	0	0	0	0	0	0	0	0	2	0	0	0	0	0	0	0	0	0	0	0	0	0
23113407|F|0-5:C>G-5:C>G	TGCAGCCAGAAGGTGCTGCCCATGCACCCTGCACCCACTCCCTTTGGCACCCTGTGGCTGCACACCAGG	TGCAGCCAGAAGGTGCTGCCCATGCACCCTGCACCCACTCCCTTTGGCACCCTGTGGCTGCACACCAGG	KN278903.1_scaffold-1573	5477	1	1.84E-28	5:C>G	5	0.986631	1	0.00542	0.99458	0	0.00542	0	0.010781	0.005391	6.70842	2	1	0	0	0	0	0	0	0	0	0	0	0	0	0	0	0	0	0	0	0	0	0	0	0	0	0	0	0	0	0
23113408|F|0-6:C>T-6:C>T	TGCAGCCAGAATCTATTAACTGACATGGAGGAAAGATGGGTCTTGCATGAGCGGTTCAGCAGGAATGCC	TGCAGCCAGAATCTATTAACTGACATGGAGGAAAGATGGGTCTTGCATG	KN284310.1_scaffold-9248	410773	1	1.35E-17	6:C>T	6	0.903743	1	0.002959	0.997041	0	0.002959	0	0.0059	0.00295	5.31719	3	1	0	-	0	0	0	0	0	0	0	0	0	0	0	0	0	0	0	0	0	0	0	0	0	-	0	0	0	0	0
23113415|F|0-59:G>A-59:G>A	TGCAGCCAGAGAGCAGAGGGGAGGGGCCAGCCCTGCTGTGGAGCAGGGAACCTCGCCCAGCCCAGAGAG	TGCAGCCAGAGAGCAGAGGGGAGGGGCCAGCCCTGCTGTGGAGCAGGGAACCTCGCCCAGCCCAGAGAG	KN284562.1_scaffold-9611	292900	14	1.84E-28	59:G>A	59	0.997326	0.89008	0.378016	0.621984	0.10992	0.268097	0.195675	0.47024	0.332957	9.63527	6.40223	1	0	0	2	2	1	2	0	0	0	0	0	0	2	0	0	0	0	0	0	0	0	0	0	1	0	0	2	0	0
23113419|F|0-33:G>A-33:G>A	TGCAGCCAGAGCAATAAGGGCAGTGGAGATGCGGGGGAGCCCAGGGCCTGCAAATAAACCCCTGGTGGG	TGCAGCCAGAGCAATAAGGGCAGTGGAGATGCGGGGGAGCCCAGGGCCTGCAAATAAACCCCTGGTGGG	KN293176.1_scaffold-22165	111174	1	1.84E-28	33:G>A	33	0.991979	0.997305	0.097035	0.902965	0.002695	0.09434	0.005376	0.175238	0.090307	6.39914	3.71429	1	0	0	0	0	0	0	1	0	0	0	0	0	0	0	0	0	0	0	2	2	0	0	0	0	0	2	0	0	0
23113438|F|0-16:C>T-16:C>T	TGCAGCCAGCAGCGGCCGGGATGCAAATAGCTGTGCCAGGCTCCTCAGCTCCATGTGCATGAGCGGTTC	TGCAGCCAGCAGCGGCCGGGATGCAAATAGCTGTGCCAGGCTCCTCAGCTCCATGTGCATG	KN277918.1_scaffold-186	5792	1	1.95E-22	16:C>T	16	1	0.986631	0.160428	0.839572	0.013369	0.147059	0.026381	0.269381	0.147881	9.15302	5.46575	1	2	0	0	0	0	0	0	2	0	0	2	2	2	0	2	0	0	0	0	2	0	0	0	0	0	2	2	0	0
23113445|F|0-48:C>T-48:C>T	TGCAGCCAGCCCCAGCTTTGGGGAGCTGCTGCCAGCTGGAAGCCTGGGCTGGCTGTGGCGCGCCGAGCA	TGCAGCCAGCCCCAGCTTTGGGGAGCTGCTGCCAGCTGGAAGCCTGGGCTGGCTGTGGCGCGCCGAGCA	JRXG01045383.1_scaffold-8797_1	11471	1	1.84E-28	48:C>T	48	0.991979	1	0.03504	0.96496	0	0.03504	0	0.067625	0.033813	6.09247	3.47059	1	0	0	0	0	0	0	0	0	0	0	0	0	0	0	0	0	0	0	0	0	0	0	0	0	0	0	0	0	0
23113449|F|0-36:G>A-36:G>A	TGCAGCCAGCGAGCAGAGGGGAGGGCAAGCCCTGCTGTGGAGCAGAGAGCCTGCCCAGCCCAGAGAGCA	TGCAGCCAGCGAGCAGAGGGGAGGGCAAGCCCTGCTGTGGAGCAGAGAGCCTGCCCAGCCCAGAGAGCA	KN281762.1_scaffold-5623	255271	9	1.84E-28	36:G>A	36	0.997326	0.997319	0.067024	0.932976	0.002681	0.064343	0.005348	0.125064	0.065206	10.21795	5.7037	1	0	0	2	0	0	2	0	0	0	0	2	0	2	0	0	0	0	0	0	0	0	0	0	0	0	0	0	0	0
23113467|F|0-32:G>A-32:G>A	TGCAGCCAGGAGCAGCATGAATCTTTCCTGGCGCTGGGCACAGCTTCCTGTCATCTGGCATGAGCGGTT	TGCAGCCAGGAGCAGCATGAATCTTTCCTGGCGCTGGGCACAGCTTCCTGTCATCTGGCATG	KN280335.1_scaffold-3612	54179	1	1.20E-24	32:G>A	32	1	0.983957	0.117647	0.882353	0.016043	0.101604	0.031571	0.207612	0.119592	8.28416	4.63462	1	0	0	0	0	0	0	0	0	0	2	0	0	0	0	0	0	0	0	0	0	0	0	0	0	0	0	0	0	0
23113468|F|0-46:C>A-46:C>A	TGCAGCCAGGAGGCTCCAAACAGCGGCGCCGGGCTCTGGAGCCCAGCCATCAGCTCTATACCGGCATAT	TGCAGCCAGGAGGCTCCAAACAGCGGCGCCGGGCTCTGGAGCCCAGCCATCAGCTCTATACCGGCATAT	KN279129.1_scaffold-1891	678255	1	1.84E-28	46:C>A	46	1	0.997326	0.085561	0.914439	0.002674	0.082888	0.005333	0.156481	0.080907	9.59402	5.02439	1	0	0	0	0	0	0	0	2	0	0	0	2	0	1	0	0	0	0	0	0	2	0	0	0	0	0	0	0	0
23113472|F|0-27:A>G-27:A>G	TGCAGCCAGGATTCATACAACACCGAAAGCTAGAGCCCTGTGCCCGCCTCTTGCAACCCTGATGCATGA	TGCAGCCAGGATTCATACAACACCGAAAGCTAGAGCCCTGTGCCCGCCTCTTGCAACCCTGATGCATGA	KN280543.1_scaffold-3901	225936	1	6.63E-28	27:A>G	27	0.997326	0.997319	0.067024	0.932976	0.002681	0.064343	0.005348	0.125064	0.065206	9.1242	5.45161	1	0	0	2	2	0	0	0	2	0	0	0	0	0	0	0	0	0	0	0	0	0	2	2	0	0	0	0	0	0
23113484|F|0-40:G>A-40:G>A	TGCAGCCAGGGAGAAGTGGGGAGGGGCCAGCCCTGCTGTAGAGCAGAGAGCCCCACCCAGCCCAGACAG	TGCAGCCAGGGAGAAGTGGGGAGGGGCCAGCCCTGCTGTAGAGCAGAGAGCCCCACCCAGCCCAGACAG	KN291996.1_scaffold-20411	182236	10	1.84E-28	40:G>A	40	0.994652	0.997312	0.05914	0.94086	0.002688	0.056452	0.005362	0.111285	0.058323	8.45708	4.92857	1	0	0	0	0	0	0	0	0	0	0	0	0	2	0	0	0	0	0	0	0	2	0	0	0	0	0	2	0	0
23113486|F|0-23:G>A-23:G>A	TGCAGCCAGGGAGCAAAGGGGAGGGGTCAGTCCTGCTGTGGAGCAGAGAGCCCCACCCAACCCAGACAG	TGCAGCCAGGGAGCAAAGGGGAGGGGTCAGTCCTGCTGTGGAGCAGAGAGCCCCACCCAACCCAGACAG	KN290051.1_scaffold-17549	21644	11	1.84E-28	23:G>A	23	1	1	0.050802	0.949198	0	0.050802	0	0.096443	0.048221	9.07676	4.95833	1	2	0	0	0	0	0	0	0	0	2	0	0	2	0	2	0	0	0	0	2	0	2	0	0	0	2	0	0	0
23113489|F|0-47:G>A-47:G>A	TGCAGCCAGGGAGCAGAAGGGAGGAGTGAGCTCTGCTGTGGAGCAGAGAGCCCCACCTAGCCCAGCCCA	TGCAGCCAGGGAGCAGAAGGGAGGAGTGAGCTCTGCTGTGGAGCAGAGAGCCCCACCTAGCCCAGCCCA	KN285791.1_scaffold-11366	154891	10	1.84E-28	47:G>A	47	1	0.994652	0.064171	0.935829	0.005348	0.058824	0.010638	0.120106	0.065372	8.76609	4.67857	1	0	0	0	0	0	0	0	0	0	0	0	0	0	0	0	0	0	0	0	0	0	0	0	0	0	0	0	0	0
23113497|F|0-23:G>A-23:G>A	TGCAGCCAGGGAGCAGAGGAGGGGGGCAGCCCTGCTGTGGAGCAGAGAGCCCCCCCAGCTCAAAGAGCA	TGCAGCCAGGGAGCAGAGGAGGGGGGCAGCCCTGCTGTGGAGCAGAGAGCCCCCCCAGCTCAAAGAGCA	KN292920.1_scaffold-21774	39568	8	1.84E-28	23:G>A	23	0.994652	1	0.037634	0.962366	0	0.037634	0	0.072436	0.036218	7.88223	4.4	1	0	0	0	0	0	0	0	0	0	0	0	0	0	0	0	0	0	0	0	2	0	0	0	0	0	0	0	0	0
23113511|F|0-18:G>A-18:G>A	TGCAGCCAGGGAGCAGAGGGGAGGGGCCAGCCCTGATGTTAAGCAAAGAGCCCTGCCCAGCCCAGAGAG	TGCAGCCAGGGAGCAGAGGGGAGGGGCCAGCCCTGATGTTAAGCAAAGAGCCCTGCCCAGCCCAGAGAG	KN285168.1_scaffold-10465	107727	10	1.84E-28	18:G>A	18	0.994652	1	0.021505	0.978495	0	0.021505	0	0.042086	0.021043	8.70753	4	1	0	0	0	0	0	0	0	0	0	0	0	0	0	0	0	0	0	0	0	0	0	0	0	0	0	0	0	0	0
23113512|F|0-65:G>A-65:G>A	TGCAGCCAGGGAGCAGAGGGGAGGGGCCAGCCCTGCTGTGAAGCAGAGAGCCTGCCCAGCCCCGAGAGC	TGCAGCCAGGGAGCAGAGGGGAGGGGCCAGCCCTGCTGTGAAGCAGAGAGCCTGCCCAGCCCCGAGAGC	JRXG01045797.1_scaffold-8899_1	450	10	1.84E-28	65:G>A	65	0.994652	0.997312	0.053763	0.946237	0.002688	0.051075	0.005362	0.101746	0.053554	8.56494	3.84615	1	0	0	0	0	0	0	0	0	0	0	0	0	0	0	0	0	0	0	0	0	0	0	0	2	0	0	0	0	0
23113514|F|0-49:G>C-49:G>C	TGCAGCCAGGGAGCAGAGGGGAGGGGCCAGCCCTTCTGTGGAGTAGAGAGCCCCGCCCAGCCCAGGAAG	TGCAGCCAGGGAGCAGAGGGGAGGGGCCAGCCCTTCTGTGGAGTAGAGAGCCCCGCCCAGCCCAGGAAG	KN280985.1_scaffold-4492	35815	12	1.84E-28	49:G>C	49	0.994652	1	0.061828	0.938172	0	0.061828	0	0.116011	0.058005	8.06681	4.44828	1	0	0	0	0	0	0	2	0	2	0	0	0	0	2	0	0	0	0	0	0	0	0	0	0	0	0	2	0	0
23113515|F|0-10:G>A-10:G>A	TGCAGCCAGGGAGCAGAGGGGAGGGGCCAGCCTGCTATGTAGCAGAGAACCCTTCTCAGCCCAGAGAGC	TGCAGCCAGGGAGCAGAGGGGAGGGGCCAGCCTGCTATGTAGCAGAGAACCCTTCTCAGCCCAGAGAGC	KN293573.1_scaffold-22771	163726	11	1.84E-28	10:G>A	10	0.994652	1	0.016129	0.983871	0	0.016129	0	0.031738	0.015869	10.40773	5.625	1	0	0	0	0	0	0	0	0	0	0	0	0	0	0	0	0	0	0	0	0	0	0	0	0	0	0	0	2	0
23113518|F|0-23:G>A-23:G>A	TGCAGCCAGGGAGCAGAGGGGAGGGGCCAGCTCTGCTGTGGAGTAGAGAGCCTCACCCAGCCAAGAGAG	TGCAGCCAGGGAGCAGAGGGGAGGGGCCAGCTCTGCTGTGGAGTAGAGAGCCTCACCCAGCCAAGAGAG	KN291833.1_scaffold-20163	124563	11	1.84E-28	23:G>A	23	1	0.989305	0.147059	0.852941	0.010695	0.136364	0.021162	0.250865	0.136013	10.79004	6.20312	1	0	0	0	0	0	0	0	0	0	2	0	0	0	0	0	0	0	0	0	0	0	0	0	0	0	0	2	2	0
23113522|F|0-30:C>A-30:C>A	TGCAGCCAGGGAGCAGAGGGGCGGGGCCAGCTCTGCTGTGGAACAGAGAGCCCCGGCCAGCCCAGAGAG	TGCAGCCAGGGAGCAGAGGGGCGGGGCCAGCTCTGCTGTGGAACAGAGAGCCCCGGCCAGCCCAGAGAG	KN286942.1_scaffold-13048	144267	11	1.84E-28	30:C>A	30	0.994652	0.997312	0.064516	0.935484	0.002688	0.061828	0.005362	0.120708	0.063035	9.01505	4.09091	1	0	0	0	0	0	0	0	0	0	0	0	0	0	0	0	0	0	0	0	0	0	0	0	0	0	0	0	0	0
23113524|F|0-47:C>G-47:C>G	TGCAGCCAGGGAGCAGAGTGGAGGGGCAAGCTCTGCTGTAGAGCAGACAGCCCCACCCAGCCCAGAGAG	TGCAGCCAGGGAGCAGAGTGGAGGGGCAAGCTCTGCTGTAGAGCAGACAGCCCCACCCAGCCCAGAGAG	KN278873.1_scaffold-1532	179948	9	1.84E-28	47:C>G	47	1	0.994652	0.058824	0.941176	0.005348	0.053476	0.010638	0.110727	0.060682	9.6086	3.86207	1	0	0	0	0	0	0	0	0	0	0	0	0	0	0	0	0	0	0	0	0	0	0	0	0	0	0	0	0	0
23113526|F|0-13:G>C-13:G>C	TGCAGCCAGGGAGGAGGGAAGAGGGCCAGCCCTGCTGTGGAGCAGAGAGCTCTGCCCAGCCCAAAGAGC	TGCAGCCAGGGAGGAGGGAAGAGGGCCAGCCCTGCTGTGGAGCAGAGAGCTCTGCCCAGCCCAAAGAGC	KN287627.1_scaffold-14033	31229	11	8.58E-27	13:G>C	13	0.994652	0.002688	1	0	0.997312	0.002688	0.005362	0	0.002681	10	8.27253	1	1	1	1	1	1	1	1	1	1	1	1	1	1	1	1	1	1	1	1	1	1	1	1	1	1	1	1	1	1
23113530|F|0-23:G>A-23:G>A	TGCAGCCAGGGAGCGGGGGGGGGGCAGCTCTGCTATGGAGTAGAGAGCCCCACCCAGCCCAGAGAGCAT	TGCAGCCAGGGAGCGGGGGGGGGGCAGCTCTGCTATGGAGTAGAGAGCCCCACCCAGCCCAGAGAGCAT	KN286071.1_scaffold-11771	89441	10	1.84E-28	23:G>A	23	0.97861	0.997268	0.002732	0.997268	0.002732	0	0.00545	0.00545	0.00545	6.54902	3	1	0	0	0	0	0	0	0	0	0	0	0	0	0	0	0	0	0	0	0	0	0	0	0	0	0	0	0	0	0
23113535|F|0-57:T>C-57:T>C	TGCAGCCAGGGAGTAGAGGGGAGGGGCCAGTCCTTCTGTGGAGCACAGAGCCCCACCTACCCCAAAAAG	TGCAGCCAGGGAGTAGAGGGGAGGGGCCAGTCCTTCTGTGGAGCACAGAGCCCCACCTACCCCAAAAAG	KN279353.1_scaffold-2205	71161	8	1.84E-28	57:T>C	57	0.991979	1	0.002695	0.997305	0	0.002695	0	0.005376	0.002688	9.23974	5.5	1	0	0	0	0	0	0	0	0	0	0	0	0	0	0	0	0	0	0	0	0	0	0	0	0	0	0	0	0	0
23113540|F|0-60:T>C-60:T>C	TGCAGCCAGGGGCAGAGGGGAGGAGCCAGCCCTGCTGTGGAACAGAGAGCCCTGCCCAGCTCAAAGAGC	TGCAGCCAGGGGCAGAGGGGAGGAGCCAGCCCTGCTGTGGAACAGAGAGCCCTGCCCAGCTCAAAGAGC	KN282889.1_scaffold-7213	16590	10	1.84E-28	60:T>C	60	0.994652	0.997312	0.032258	0.967742	0.002688	0.02957	0.005362	0.062435	0.033898	10.43041	6.8	1	0	0	0	0	0	0	0	0	0	0	0	0	0	0	0	0	0	0	0	0	0	0	0	0	0	0	0	0	0
23113542|F|0-7:A>C-7:A>C	TGCAGCCAGGGGGAGCTAGAGACTGGGGACAGCACCTGTGCTGGCCCAGGCAATATAAAAACCTGCTCT	TGCAGCCAGGGGGAGCTAGAGACTGGGGACAGCACCTGTGCTGGCCCAGGCAATATAAAAACCTGCTCT	KN291670.1_scaffold-19929	31097	6	1.84E-28	7:A>C	7	0.954545	1	0.008403	0.991597	0	0.008403	0	0.016665	0.008333	4.91403	3	1	0	0	0	0	-	0	0	0	0	0	0	0	0	0	0	0	0	0	0	0	0	0	0	0	0	0	0	0	0
23113544|F|0-43:C>T-43:C>T	TGCAGCCAGGGGGCAGAGGGGAGGGGTCAGTCCTGCTGTGGAGCAGAGAGCCCCACTAAGCCCCAAGAG	TGCAGCCAGGGGGCAGAGGGGAGGGGTCAGTCCTGCTGTGGAGCAGAGAGCCCCACTAAGCCCCAAGAG	KN283911.1_scaffold-8674	76221	9	1.84E-28	43:C>T	43	0.997326	1	0.018767	0.981233	0	0.018767	0	0.036829	0.018415	8.94231	3.85714	1	0	0	0	0	0	0	0	0	0	0	0	0	0	0	0	0	0	0	0	0	0	0	0	0	0	0	0	0	0
23113551|F|0-35:C>T-35:C>T	TGCAGCCAGTCTGGGACCTATCCTGCATACATTGCCTGCAAGTGCTGCATGAGCGGTTCAGCAGGAATG	TGCAGCCAGTCTGGGACCTATCCTGCATACATTGCCTGCAAGTGCTGCATG	KN278976.1_scaffold-1674	26403	1	1.09E-18	35:C>T	35	0.946524	0.997175	0.022599	0.977401	0.002825	0.019774	0.005634	0.044176	0.024905	7.83333	5.22222	1	0	0	0	0	0	0	0	0	0	0	0	0	2	0	0	0	0	0	0	0	1	0	0	0	0	0	0	0	0
23113555|F|0-31:A>G-31:A>G	TGCAGCCAGTGGGCACTGCCTACACCCCTTGACAACTGCCATTGCAGCACCCTGTGGCAGCATGAGCGG	TGCAGCCAGTGGGCACTGCCTACACCCCTTGACAACTGCCATTGCAGCACCCTGTGGCAGCATG	KN289691.1_scaffold-17013	57187	1	9.81E-26	31:A>G	31	1	0.991979	0.112299	0.887701	0.008021	0.104278	0.015914	0.199377	0.107645	9.20557	4.19565	1	0	0	0	0	0	0	0	2	0	0	1	2	2	0	0	2	0	0	0	0	2	0	0	0	0	2	0	0	2
23113563|F|0-53:G>A-53:G>A	TGCAGCCATCAGGGTCTGCCATTGTCTATAGGCAAGGCTGGTGTGTGCGGAGTGAAAGTGTAAGCATGA	TGCAGCCATCAGGGTCTGCCATTGTCTATAGGCAAGGCTGGTGTGTGCGGAGTGAAAGTGTAAGCATGA	KN280115.1_scaffold-3312	47182	1	6.63E-28	53:G>A	53	1	0.97861	0.152406	0.847594	0.02139	0.131016	0.041866	0.258357	0.150112	11.62256	5.07143	1	2	0	0	0	0	0	0	0	0	0	0	0	0	0	0	0	0	0	0	0	0	0	0	0	0	2	0	2	0
23113564|F|0-45:A>T-45:A>T	TGCAGCCATCAGTAGGTCTTGAAGCAGGAACAGATTCTCCTGAATAGTCCTTCCCAGCATGAGCGGTTC	TGCAGCCATCAGTAGGTCTTGAAGCAGGAACAGATTCTCCTGAATAGTCCTTCCCAGCATG	KN278764.1_scaffold-1378	270491	1	4.20E-24	45:A>T	45	0.997326	1	0.005362	0.994638	0	0.005362	0	0.010666	0.005333	8.91684	4	1	0	0	0	0	0	0	0	0	0	0	0	0	0	0	0	0	0	0	0	0	0	0	0	0	0	0	0	0	0
23113567|F|0-67:C>A-67:C>A	TGCAGCCATCTCAAATTTAACCACAGCTCCACTCCCCGTCCTGCACTACCATGCAACAAGGCCAGAGCT	TGCAGCCATCTCAAATTTAACCACAGCTCCACTCCCCGTCCTGCACTACCATGCAACAAGGCCAGAGCT	KN283370.1_scaffold-7903	16208	1	1.84E-28	67:C>A	67	0.981283	1	0.00545	0.99455	0	0.00545	0	0.01084	0.00542	6.88571	4	1	0	0	0	0	0	0	0	0	0	0	0	0	0	0	0	0	0	0	0	0	0	0	0	0	0	0	0	0	0
23113568|F|0-37:C>T-37:C>T	TGCAGCCATCTCCAGGTTGGATCAGGCCTGAGCAACACGCATACACACACATGCACGCACAGACACACT	TGCAGCCATCTCCAGGTTGGATCAGGCCTGAGCAACACGCATACACACACATGCACGCACAGACACACT	KN289528.1_scaffold-16770	51146	1	1.84E-28	37:C>T	37	1	1	0.010695	0.989305	0	0.010695	0	0.021162	0.010581	9.79787	4.6	1	2	0	0	0	0	0	0	0	0	0	0	0	0	0	0	0	0	0	0	0	0	0	0	0	0	0	0	0	0
23113571|F|0-20:C>T-20:C>T	TGCAGCCATCTTGGCTAGGACGGGGAGGTTATGAATAACAAAGGACACCTCATTTCGTTGCTGTTTGGC	TGCAGCCATCTTGGCTAGGACGGGGAGGTTATGAATAACAAAGGACACCTCATTTCGTTGCTGTTTGGC	KN286315.1_scaffold-12126	415694	1	1.84E-28	20:C>T	20	0.981283	1	0.002725	0.997275	0	0.002725	0	0.005435	0.002717	6.50976	6	1	0	0	0	0	0	0	0	0	0	0	0	0	0	0	0	0	0	0	0	0	0	0	0	0	0	0	0	0	0
23113573|F|0-45:G>A-45:G>A	TGCAGCCATGACAGGATGCCTGGCCAGCAGCTGAATTGTGGCTCCGGCCAGCCAGGCTCTAGTTTTGGG	TGCAGCCATGACAGGATGCCTGGCCAGCAGCTGAATTGTGGCTCCGGCCAGCCAGGCTCTAGTTTTGGG	KN281836.1_scaffold-5727	75157	1	1.84E-28	45:G>A	45	0.994652	1	0.002688	0.997312	0	0.002688	0	0.005362	0.002681	6.39186	3	1	0	0	0	0	0	0	0	0	0	0	0	0	0	0	0	0	0	0	0	0	0	0	0	0	0	0	0	0	0
23113577|F|0-64:G>A-64:G>A	TGCAGCCATGGAACTGGTGCCCAGGCTGTGGAGCCCATGCAGCCGAGCCTCCAGGCTGCTGGCAGAAGC	TGCAGCCATGGAACTGGTGCCCAGGCTGTGGAGCCCATGCAGCCGAGCCTCCAGGCTGCTGGCAGAAGC	KN278928.1_scaffold-1603	38346	1	1.84E-28	64:G>A	64	0.983957	0.997283	0.040761	0.959239	0.002717	0.038043	0.00542	0.078199	0.041809	4.53261	4.33333	1	0	0	0	0	0	0	0	0	0	0	0	0	0	-	0	0	0	0	0	0	0	0	0	0	-	0	0	0	0
23113580|F|0-9:G>A-9:G>A	TGCAGCCATGGAGCAGAGGGGAGGAGCCAGCTCTGCTGTGGAGCAGAGAGCTCCACCCACTCCAGAGAG	TGCAGCCATGGAGCAGAGGGGAGGAGCCAGCTCTGCTGTGGAGCAGAGAGCTCCACCCACTCCAGAGAG	KN281730.1_scaffold-5578	198857	10	1.84E-28	9:G>A	9	0.997326	1	0.013405	0.986595	0	0.013405	0	0.02645	0.013225	9.70815	3.16667	1	0	0	0	0	0	0	0	0	0	0	0	0	0	0	0	0	0	0	0	0	0	0	0	0	0	0	0	0	0
23113582|F|0-67:C>G-67:C>G	TGCAGCCATGGCAATCTGGCAACAGGGAGCCTGGCTGGCAGCCAGAGTGTAGGTCTGGCCAGCCAGGCT	TGCAGCCATGGCAATCTGGCAACAGGGAGCCTGGCTGGCAGCCAGAGTGTAGGTCTGGCCAGCCAGGCT	KN285904.1_scaffold-11523	13948	4	1.84E-28	67:C>G	67	0.991979	1	0.008086	0.991914	0	0.008086	0	0.016042	0.008021	5.74675	3	1	0	0	0	0	0	0	0	0	0	0	0	0	0	0	0	0	0	0	0	0	0	0	0	0	0	0	0	0	0
23113588|F|0-50:G>C-50:G>C	TGCAGCCATGGGAGGAAGCCTGACTGGCAGCCGGAGCATGGCTCTGATTGGCCAGGCTCTGCTTTTGGG	TGCAGCCATGGGAGGAAGCCTGACTGGCAGCCGGAGCATGGCTCTGATTGGCCAGGCTCTGCTTTTGGG	KN288054.1_scaffold-14644	6442	1	1.84E-28	50:G>C	50	0.997326	0.994638	0.080429	0.919571	0.005362	0.075067	0.010666	0.14792	0.079293	6.92918	4.32353	1	0	0	0	0	0	0	0	0	0	0	0	0	0	2	0	0	0	0	0	0	0	0	0	0	0	0	0	2	0
23113597|F|0-48:C>T-48:C>T	TGCAGCCATTGCTGGTCATCCCATGTTTACAAAATGATGCAGTGCCACCGCATGGTGATAGTTTTCTGC	TGCAGCCATTGCTGGTCATCCCATGTTTACAAAATGATGCAGTGCCACCGCATGGTGATAGTTTTCTGC	KN284852.1_scaffold-10031	7161	1	1.84E-28	48:C>T	48	0.967914	0.997238	0.008287	0.991713	0.002762	0.005525	0.00551	0.016437	0.010973	4.44196	3	1	0	0	0	0	0	0	0	0	0	0	0	0	0	0	0	0	0	0	0	0	0	0	0	-	0	0	0	0	0
23113603|F|0-40:G>C-40:G>C	TGCAGCCCAAGGGATTTGGGGTCCCAGGGCTTCCCCGTGAGGCAAAACATGGGGAGCATGAGCGGTTCA	TGCAGCCCAAGGGATTTGGGGTCCCAGGGCTTCCCCGTGAGGCAAAACATGGGGAGCATG	KN286194.1_scaffold-11957	429106	1	1.47E-23	40:G>C	40	0.997326	0.989276	0.045576	0.954424	0.010724	0.034853	0.021218	0.086998	0.054108	10.52609	5.15789	1	0	0	0	0	0	0	0	0	2	0	0	0	0	0	0	0	0	0	0	0	0	0	0	0	0	0	0	0	0
23113604|F|0-54:G>C-54:G>C	TGCAGCCCAAGTCATTTAAGAAGCATTATGCTGCCAAATTTCCTACAGCGGTTAGAATTAGTGCGCAAT	TGCAGCCCAAGTCATTTAAGAAGCATTATGCTGCCAAATTTCCTACAGCGGTTAGAATTAGTGCGCAAT	KN279046.1_scaffold-1774	33065	5	8.58E-27	54:G>C	54	0.991979	1	0.048518	0.951482	0	0.048518	0	0.092327	0.046164	5.73548	3.08	1	0	0	0	0	0	0	0	0	0	0	0	0	0	0	0	0	0	0	0	0	2	0	0	0	2	0	0	0	0
23113609|F|0-19:T>A-19:T>A	TGCAGCCCACACGGCTCCCTGCAACAGGGGGGTGGGTGCTAGCAGGGGTCCACAAAGGCACCTGGCATG	TGCAGCCCACACGGCTCCCTGCAACAGGGGGGTGGGTGCTAGCAGGGGTCCACAAAGGCACCTGGCATG	KN290290.1_scaffold-17898	350413	1	1.84E-28	19:T>A	19	1	0.997326	0.053476	0.946524	0.002674	0.050802	0.005333	0.101233	0.053283	7.9403	4.33333	1	0	0	0	0	0	0	0	0	0	0	0	0	0	0	0	0	0	0	0	0	0	0	0	0	0	0	0	0	0
23113617|F|0-56:G>T-56:G>T	TGCAGCCCACCCCCACATCCAACTCTGTAAAGGATCACAATCAGCCAATTGCATGTGCCGTGATACAAT	TGCAGCCCACCCCCACATCCAACTCTGTAAAGGATCACAATCAGCCAATTGCATGTGCCGTGATACAAT	KN292045.1_scaffold-20483	137249	1	1.84E-28	56:G>T	56	0.991979	1	0.010782	0.989218	0	0.010782	0	0.021331	0.010665	6.14286	3.75	1	0	0	0	0	0	0	0	0	0	0	0	0	0	0	0	0	0	0	0	0	0	0	0	0	0	0	0	0	0
23113630|F|0-7:C>A-7:C>A	TGCAGCCCAGCAGCCTTGCCACATGCATGTGGTTATTTGGTTCTGTGCGTACGCATGTATGTGTGCATG	TGCAGCCCAGCAGCCTTGCCACATGCATGTGGTTATTTGGTTCTGTGCGTACGCATGTATGTGTGCATG	KN281691.1_scaffold-5523	40636	1	1.84E-28	7:C>A	7	0.997326	1	0.002681	0.997319	0	0.002681	0	0.005348	0.002674	8.97414	3	1	0	0	0	0	0	0	0	0	0	0	0	0	0	0	0	0	0	0	0	0	0	0	0	0	0	0	0	0	0
23113659|F|0-13:G>T-13:G>T	TGCAGCCCATGCTGCACCGTACACCGGGCACATATGTAGCGGCATGAGCGGTTCAGCAGGAATGCCGAG	TGCAGCCCATGCTGCACCGTACACCGGGCACATATGTAGCGGCATG	KN280952.1_scaffold-4452	3972	1	5.50E-16	13:G>T	13	0.994652	1	0.037634	0.962366	0	0.037634	0	0.072436	0.036218	11.54721	7.47059	1	0	0	0	0	0	0	0	0	0	0	2	2	0	0	2	2	0	0	0	0	0	0	0	0	2	0	0	0	0
23113670|F|0-46:C>T-46:C>T	TGCAGCCCCAGATTTGGCCAGGAACTGTCCCATTCTGGGGCAGATCCCATCCAGCTCCAAGCTGTGTGG	TGCAGCCCCAGATTTGGCCAGGAACTGTCCCATTCTGGGGCAGATCCCATCCAGCTCCAAGCTGTGTGG	KN283738.1_scaffold-8429	5929	1	1.84E-28	46:C>T	46	0.991979	0.986523	0.121294	0.878706	0.013477	0.107817	0.026591	0.213163	0.119877	6.14629	3.48077	1	0	0	0	0	0	0	0	0	0	0	0	0	0	0	0	0	0	0	0	0	0	0	0	0	0	0	0	0	0
23113673|F|0-11:C>T-11:C>T	TGCAGCCCCAGCCCCTGGACAGCTTTTCTCAGCGCTGGCAGGCACGTACCCCCATCACACACTCATTCC	TGCAGCCCCAGCCCCTGGACAGCTTTTCTCAGCGCTGGCAGGCACGTACCCCCATCACACACTCATTCC	KN284995.1_scaffold-10224	903733	1	1.84E-28	11:C>T	11	0.991979	1	0.018868	0.981132	0	0.018868	0	0.037024	0.018512	8.77419	4.42857	1	0	0	0	0	0	0	0	0	0	0	0	0	0	0	0	0	0	0	0	0	0	0	0	0	0	0	0	0	0
23113684|F|0-62:T>C-62:T>C	TGCAGCCCCAGGGTCAGCCACAAGGTGTGACCAGCAATGACACTGCTGGCCACCAGCAGTGATAGCTGC	TGCAGCCCCAGGGTCAGCCACAAGGTGTGACCAGCAATGACACTGCTGGCCACCAGCAGTGATAGCTGC	KN280501.1_scaffold-3849	60459	1	1.84E-28	62:T>C	62	0.997326	0.991957	0.058981	0.941019	0.008043	0.050938	0.015956	0.111005	0.063481	6.38178	3.77778	1	0	0	0	0	0	0	0	0	0	0	0	0	0	0	0	0	0	0	0	0	0	0	0	0	0	0	0	0	2
23113689|F|0-56:C>A-56:C>A	TGCAGCCCCATGCACCATGTGCAGCATACACCAACCTCAAGTCCACAGGCAACACACAGCATGAGCGGT	TGCAGCCCCATGCACCATGTGCAGCATACACCAACCTCAAGTCCACAGGCAACACACAGCATG	KN288563.1_scaffold-15366	54542	1	3.43E-25	56:C>A	56	0.997326	0.989276	0.112601	0.887399	0.010724	0.101877	0.021218	0.199843	0.110531	9.44708	5.18	1	0	0	0	0	0	2	0	2	0	0	0	0	0	0	0	2	0	0	0	0	0	0	2	0	0	0	0	0	0
23113691|F|0-25:T>C-25:T>C	TGCAGCCCCATGTCAACCCAGGCATTTCAATGGCAGGCCCCTCCAGCATGAGCGGTTCAGCAGGAATGC	TGCAGCCCCATGTCAACCCAGGCATTTCAATGGCAGGCCCCTCCAGCATG	KN288940.1_scaffold-15902	157781	2	3.91E-18	25:T>C	25	0.983957	0.997283	0.005435	0.994565	0.002717	0.002717	0.00542	0.01081	0.008115	10.51982	5	1	0	0	0	0	0	0	0	0	0	0	0	0	0	0	0	0	0	0	0	0	0	0	0	0	0	-	0	0	0
23113692|F|0-20:A>C-20:A>C	TGCAGCCCCATGTGCTTTTAAAAGCACCTGGCGCTGCAATGCATGAGCGGTTCAGCAGGAATGCCGAGA	TGCAGCCCCATGTGCTTTTAAAAGCACCTGGCGCTGCAATGCATG	KN289939.1_scaffold-17388	276874	1	1.88E-15	20:A>C	20	0.986631	1	0.00271	0.99729	0	0.00271	0	0.005405	0.002703	9.59052	3	1	0	0	0	0	0	0	0	0	0	0	0	0	0	0	0	0	0	0	0	0	0	0	0	0	0	0	0	0	0
23113693|F|0-23:T>G-23:T>G	TGCAGCCCCCAAAAAGGTCAGGATAATCCAGGCCAGTGCAGATCACATCCAGTGGAAATGACTTGTGCA	TGCAGCCCCCAAAAAGGTCAGGATAATCCAGGCCAGTGCAGATCACATCCAGTGGAAATGACTTGTGCA	KN287583.1_scaffold-13971	272254	1	1.84E-28	23:T>G	23	0.991979	1	0.002695	0.997305	0	0.002695	0	0.005376	0.002688	9.63519	3	1	0	0	0	0	0	0	0	0	0	0	0	0	0	0	0	0	0	0	0	0	0	0	0	0	0	0	0	0	0
23113697|F|0-22:T>C-22:T>C	TGCAGCCCCCAGAAACCTTAAATGCTTTCATCACCGGCACAGCAGAGCATGAGCGGTTCAGCAGGAATG	TGCAGCCCCCAGAAACCTTAAATGCTTTCATCACCGGCACAGCAGAGCATG	KN282035.1_scaffold-5991	248529	1	1.09E-18	22:T>C	22	0.949198	1	0.002817	0.997183	0	0.002817	0	0.005618	0.002809	7.39773	3	1	0	0	0	-	0	0	0	0	0	0	0	0	0	0	0	0	0	0	0	0	0	0	0	0	0	0	0	0	0
23113698|F|0-16:A>G-16:A>G	TGCAGCCCCCATACTCAGACTCTGCACCCACTTTGCTATATGCCTGGCACTGTCCAGCCCAGGATCACC	TGCAGCCCCCATACTCAGACTCTGCACCCACTTTGCTATATGCCTGGCACTGTCCAGCCCAGGATCACC	KN279410.1_scaffold-2288	98837	1	1.84E-28	16:A>G	16	0.991979	1	0.016173	0.983827	0	0.016173	0	0.031822	0.015911	8.18966	4.66667	1	0	0	0	0	0	0	0	0	0	0	0	0	0	0	0	0	0	0	0	0	0	0	0	0	0	0	0	0	0
23113701|F|0-46:T>C-46:T>C	TGCAGCCCCCATGGAGCCGAATCAGAGGGAGCTGGAGCATGAGCGGTTCAGCAGGAATGCCGAGACCGA	TGCAGCCCCCATGGAGCCGAATCAGAGGGAGCTGGAGCATG	KN279682.1_scaffold-2702	122194	1	2.52E-13	46:T>C	46	0.994652	1	0.002688	0.997312	0	0.002688	0	0.005362	0.002681	10.19914	3	1	0	0	0	0	0	0	0	0	0	0	0	0	0	0	0	0	0	0	0	0	0	0	0	0	0	0	0	0	0
23113704|F|0-49:C>A-49:C>A	TGCAGCCCCCCCACTTGCTGCTCCAGGCAGCATTTGCTGCTGTTGTCCACCCAGAGCTGGCATGAGCGG	TGCAGCCCCCCCACTTGCTGCTCCAGGCAGCATTTGCTGCTGTTGTCCACCCAGAGCTGGCATG		0	0	999	49:C>A	49	0.94385	0.997167	0.03966	0.96034	0.002833	0.036827	0.00565	0.076174	0.040912	7.68349	4.6875	1	0	0	0	0	0	0	0	0	0	0	0	0	0	0	-	0	0	0	0	0	0	0	0	0	0	0	0	-	0
23113706|F|0-15:G>A-15:G>A	TGCAGCCCCCCGCTCGCCATGCCAGGCAGTGTTTGCTGCTGCTGCCCACCTGGAGCTTGCATGAGCGGT	TGCAGCCCCCCGCTCGCCATGCCAGGCAGTGTTTGCTGCTGCTGCCCACCTGGAGCTTGCATG	KN292867.1_scaffold-21696	8123	10	3.43E-25	15:G>A	15	0.989305	0.997297	0.086486	0.913514	0.002703	0.083784	0.005391	0.158013	0.081702	9.87912	4.47059	1	0	0	0	0	0	0	0	0	0	0	0	0	0	0	0	0	0	0	0	0	0	0	0	0	0	0	0	0	0
23113712|F|0-7:C>T-7:C>T	TGCAGCCCCCTGCCCCATGGCCCTTCCTGTGGTCCTGTGAGCATGAGCGGTTCAGCAGGAATGCCGAGA	TGCAGCCCCCTGCCCCATGGCCCTTCCTGTGGTCCTGTGAGCATG	KN278402.1_scaffold-860	113105	1	1.88E-15	7:C>T	7	0.997326	1	0.010724	0.989276	0	0.010724	0	0.021218	0.010609	11.64882	6.5	1	0	0	0	0	0	0	0	0	0	0	0	0	0	0	0	2	0	0	0	0	0	0	0	0	0	0	0	0	0
23113727|F|0-14:A>G-14:A>G	TGCAGCCCCGGGGGAGGGGACCCTTCACGCAGCACACACGTGTACACTGCATGAGCGGTTCAGCAGGAA	TGCAGCCCCGGGGGAGGGGACCCTTCACGCAGCACACACGTGTACACTGCATG	KN289345.1_scaffold-16490	52731	1	9.08E-20	14:A>G	14	1	1	0.008021	0.991979	0	0.008021	0	0.015914	0.007957	9.84154	3.33333	1	0	0	0	0	0	0	0	0	0	0	0	0	0	0	0	0	0	0	0	0	0	0	0	0	0	0	0	0	0
23113728|F|0-24:C>G-24:C>G	TGCAGCCCCGGTGAGAAAGGCACTCTGCTCCCCAGTGCGTCCTGGCCCCAGCCCACAGCCATGGCTCTG	TGCAGCCCCGGTGAGAAAGGCACTCTGCTCCCCAGTGCGTCCTGGCCCCAGCCCACAGCCATGGCTCTG	KN288497.1_scaffold-15276	294055	1	1.84E-28	24:C>G	24	1	1	0.016043	0.983957	0	0.016043	0	0.031571	0.015785	7.9766	4.85714	1	0	0	0	0	0	0	0	0	0	0	0	0	0	0	0	2	0	0	0	0	0	0	0	0	0	0	0	0	0
23113734|F|0-44:G>C-44:G>C	TGCAGCCCCTGCCAAGTTGGGCTCTTCTTTCACTCCCACACAGCGTGCTAATTAGCATGAGCGGTTCAG	TGCAGCCCCTGCCAAGTTGGGCTCTTCTTTCACTCCCACACAGCGTGCTAATTAGCATG	KN286138.1_scaffold-11866	14987	1	5.12E-23	44:G>C	44	1	1	0.016043	0.983957	0	0.016043	0	0.031571	0.015785	10.21535	4.85714	1	0	0	0	0	0	0	0	0	0	0	0	0	0	0	0	0	0	0	0	0	0	0	0	0	0	0	0	0	0
23113738|F|0-15:T>C-15:T>C	TGCAGCCCCTGCTTCTTCCTGGCACATTGGCAATACACAGCAGCATGAGCGGTTCAGCAGGAATGCCGA	TGCAGCCCCTGCTTCTTCCTGGCACATTGGCAATACACAGCAGCATG	KN291483.1_scaffold-19646	203191	1	1.60E-16	15:T>C	15	0.986631	1	0.00271	0.99729	0	0.00271	0	0.005405	0.002703	9.89823	3	1	0	0	0	0	0	0	0	0	0	0	0	0	0	0	0	0	0	0	0	0	0	0	0	0	0	0	0	0	0
23113744|F|0-19:G>A-19:G>A	TGCAGCCCGAGCCCATGTGGGGCTGGGGTTCTGGCCCCTGCCCGGCTCCAGGTGCAGAGCCCAGGGGAT	TGCAGCCCGAGCCCATGTGGGGCTGGGGTTCTGGCCCCTGCCCGGCTCCAGGTGCAGAGCCCAGGGGAT	KN285697.1_scaffold-11217	571234	1	1.84E-28	19:G>A	19	0.994652	0.994624	0.126344	0.873656	0.005376	0.120968	0.010695	0.220763	0.115729	7.13666	3.68966	1	0	0	0	0	0	0	0	0	0	0	0	0	0	2	0	0	0	0	0	0	0	0	0	0	0	0	0	0	0
23113752|F|0-54:A>C-54:A>C	TGCAGCCCGGGCCAGAGTTAAGAGCCAGGCAAGCAGGTCCCGCTATTGCTCAGCACACGCATGAGCGGT	TGCAGCCCGGGCCAGAGTTAAGAGCCAGGCAAGCAGGTCCCGCTATTGCTCAGCACACGCATG	KN286700.1_scaffold-12700	63663	1	3.43E-25	54:A>C	54	1	1	0.016043	0.983957	0	0.016043	0	0.031571	0.015785	7.00866	3.875	1	0	0	0	0	0	0	0	0	0	0	0	0	0	0	0	0	0	0	0	0	0	0	0	0	0	0	0	0	0
23113757|F|0-9:A>G-9:A>G	TGCAGCCCTACAATGGAACCCTGCCACCAGCCTCTTCCTGGCCAAGGAGCAGCATGAGCGGTTCAGCAG	TGCAGCCCTACAATGGAACCCTGCCACCAGCCTCTTCCTGGCCAAGGAGCAGCATG	KN290309.1_scaffold-17925	305438	1	2.17E-21	9:A>G	9	1	0.994652	0.082888	0.917112	0.005348	0.07754	0.010638	0.152035	0.081336	9.76017	4.61765	1	0	0	0	0	0	0	0	0	0	0	0	0	0	0	0	0	0	0	0	0	0	0	0	0	0	0	2	2	0
23113765|F|0-13:G>A-13:G>A	TGCAGCCCTCCCAGGGGGTGCAGGCTCCCAGATCTGCATGTGGGATGACAGCATGAGCGGTTCAGCAGG	TGCAGCCCTCCCAGGGGGTGCAGGCTCCCAGATCTGCATGTGGGATGACAGCATG	KN293520.1_scaffold-22689	341762	8	7.54E-21	13:G>A	13	0.877005	1	0.003049	0.996951	0	0.003049	0	0.006079	0.003039	6.91603	4	1	0	0	0	-	0	0	0	0	0	0	0	0	0	0	-	0	0	0	0	0	0	0	0	0	0	-	0	-	0
23113766|F|0-13:G>C-13:G>C	TGCAGCCCTCCCAGGGGGTGTTGGTCCTTGGAGCTGCACACAGGACGACAGCATGAGCGGTTCAGCAGG	TGCAGCCCTCCCAGGGGGTGTTGGTCCTTGGAGCTGCACACAGGACGACAGCATG	JRXG01105086.1_scaffold-21664_1	20245	1	7.54E-21	13:G>C	13	0.954545	0.97479	0.05042	0.94958	0.02521	0.02521	0.049149	0.095756	0.072453	9.36706	7	1	0	0	0	-	0	0	0	0	0	0	0	0	0	0	-	0	0	0	0	0	0	0	0	0	0	0	0	-	0
23113775|F|0-42:A>G-42:A>G	TGCAGCCCTCTTGATGAATAGTCAGGTGGTGCATAGATTGCTATAGATCCTGTTGTGAGAGGCCCTCCT	TGCAGCCCTCTTGATGAATAGTCAGGTGGTGCATAGATTGCTATAGATCCTGTTGTGAGAGGCCCTCCT	KN283516.1_scaffold-8109	143237	1	1.84E-28	42:A>G	42	0.991979	1	0.002695	0.997305	0	0.002695	0	0.005376	0.002688	6.38793	3	1	0	0	0	0	0	0	0	0	0	0	0	0	0	0	0	0	0	0	0	0	0	0	0	-	0	0	0	0	0
23110283|F|0-20:C>A-20:C>A	TGCAGCCCTCTTGGGGGGCACGGGCCTCTGGATCTGCGTGTGGGTTGACAGCATGAGCGGTTCAGCAGG	TGCAGCCCTCTTGGGGGGCACGGGCCTCTGGATCTGCGTGTGGGTTGACAGCATG	KN292435.1_scaffold-21062	13515	1	7.54E-21	20:C>A	20	0.959893	1	0.002786	0.997214	0	0.002786	0	0.005556	0.002778	10.26846	3	1	0	0	0	0	0	0	0	0	0	0	0	0	0	0	0	0	0	0	0	0	0	0	0	0	0	0	0	0	0
23113800|F|0-41:A>G-41:A>G	TGCAGCCCTGGGCTAGCACTCTGAAACAAGGCGGGGTGTGCAGTGCATGAGCGGTTCAGCAGGAATGCC	TGCAGCCCTGGGCTAGCACTCTGAAACAAGGCGGGGTGTGCAGTGCATG	KN290107.1_scaffold-17630	108760	1	1.35E-17	41:A>G	41	0.994652	1	0.010753	0.989247	0	0.010753	0	0.021274	0.010637	10.95259	4.25	1	0	0	0	0	0	0	0	2	0	0	0	0	0	0	0	0	0	0	0	0	0	0	0	0	0	0	0	0	0
23113803|F|0-25:A>G-25:A>G	TGCAGCCCTGGGGGCTGGCCAGGCCAGCGGGGCTGCCAGCATGAGCGGTTCAGCAGGAATGCCGAGACC	TGCAGCCCTGGGGGCTGGCCAGGCCAGCGGGGCTGCCAGCATG	KN285124.1_scaffold-10401	33065	1	2.19E-14	25:A>G	25	0.986631	0.99729	0.04607	0.95393	0.00271	0.04336	0.005405	0.087896	0.046651	12.44444	4.90909	1	0	0	0	0	0	0	0	0	0	0	0	0	0	0	0	0	0	0	0	0	0	0	0	0	0	0	0	0	0
23113808|F|0-18:C>T-18:C>T	TGCAGCCCTTCCCAGTCCCAACACCATATGCTCCTTCTGGAAACAGAAGCATGAGCGGTTCAGCAGGAA	TGCAGCCCTTCCCAGTCCCAACACCATATGCTCCTTCTGGAAACAGAAGCATG	KN280170.1_scaffold-3388	186332	1	9.08E-20	18:C>T	18	0.994652	1	0.005376	0.994624	0	0.005376	0	0.010695	0.005347	10.70779	6.5	1	0	0	0	0	0	0	0	0	0	0	0	0	0	0	0	0	0	0	0	0	0	0	0	0	0	0	0	0	0
23113811|F|0-52:G>A-52:G>A	TGCAGCCCTTCCTGATGACTCACTTTATCAGCCCTGGGCTTATACACACACAGCAGCCATATCCATGGC	TGCAGCCCTTCCTGATGACTCACTTTATCAGCCCTGGGCTTATACACACACAGCAGCCATATCCATGGC	KN288325.1_scaffold-15026	58054	1	1.84E-28	52:G>A	52	0.986631	0.97019	0.186992	0.813008	0.02981	0.157182	0.057843	0.304052	0.180948	6.18889	4.05128	1	0	0	0	0	2	0	0	0	0	1	0	0	0	2	0	0	0	0	0	0	0	0	0	2	2	0	2	0	0
23113814|F|0-9:T>C-9:T>C	TGCAGCCCTTCTTCCTCCCTGCCCCCACTTTACTGTCAGACCCTGCTCCCTGAGTACATGGAAGGGAGG	TGCAGCCCTTCTTCCTCCCTGCCCCCACTTTACTGTCAGACCCTGCTCCCTGAGTACATGGAAGGGAGG	KN288357.1_scaffold-15078	74738	1	1.84E-28	9:T>C	9	0.973262	0.983516	0.057692	0.942308	0.016484	0.041209	0.032424	0.108728	0.070576	5.47309	3.80769	1	0	0	0	0	0	0	0	0	0	0	0	0	0	0	0	0	0	0	0	0	0	0	0	0	0	0	0	0	0
23113824|F|0-41:A>C-41:A>C	TGCAGCCGATCGCTGAGCCAGAGGGATGTGGGGGGGGGTCTACCACCAAGCATGAGCGGTTCAGCAGGA	TGCAGCCGATCGCTGAGCCAGAGGGATGTGGGGGGGGGTCTACCACCAAGCATG	KN292624.1_scaffold-21324	41055	1	2.62E-20	41:A>C	41	1	1	0.050802	0.949198	0	0.050802	0	0.096443	0.048221	9.07296	6.78261	1	2	0	0	0	0	0	2	0	0	2	0	0	2	0	0	0	0	0	2	2	0	0	2	0	0	0	0	0	0
23113836|F|0-20:G>A-20:G>A	TGCAGCCGCCACAGGGAGAGGAAAGGATCCTCCCCACAGGACCCGCAGAGCCTGACAAGCTGGGGGCAG	TGCAGCCGCCACAGGGAGAGGAAAGGATCCTCCCCACAGGACCCGCAGAGCCTGACAAGCTGGGGGCAG	KN285034.1_scaffold-10273	42220	5	1.84E-28	20:G>A	20	0.997326	1	0.002681	0.997319	0	0.002681	0	0.005348	0.002674	6.96581	3	1	0	0	0	0	0	0	0	0	0	0	0	0	0	0	0	0	0	0	0	0	0	0	0	0	0	0	0	0	0
23113837|F|0-27:C>T-27:C>T	TGCAGCCGCCACCACCCTGCACCACTGCGGAGCCGTCCAGCCAGTTGTAGGGCATGAGCGGTTCAGCAG	TGCAGCCGCCACCACCCTGCACCACTGCGGAGCCGTCCAGCCAGTTGTAGGGCATG	KN289250.1_scaffold-16346	18312	1	2.17E-21	27:C>T	27	0.989305	0.997297	0.032432	0.967568	0.002703	0.02973	0.005391	0.062761	0.034076	6.03268	3.15385	1	0	0	0	0	0	0	0	0	0	2	0	0	0	0	0	0	0	0	0	0	0	0	0	0	0	0	0	-	0
23113851|F|0-31:G>A-31:G>A	TGCAGCCGGGAGCTGCAAGGTGTGCACACGCGTGTGTTGGGGGTGCATGTTTTCACGTGTCTGTGCACC	TGCAGCCGGGAGCTGCAAGGTGTGCACACGCGTGTGTTGGGGGTGCATGTTTTCACGTGTCTGTGCACC	KN279493.1_scaffold-2414	69940	1	1.84E-28	31:G>A	31	0.97861	1	0.005464	0.994536	0	0.005464	0	0.010869	0.005435	12.57522	2	1	0	0	0	0	0	0	0	0	0	0	0	0	0	0	0	0	0	0	0	0	0	0	0	0	0	0	0	-	0
23113856|F|0-22:C>G-22:C>G	TGCAGCCGGGAGGCTGCAAACACCTGCTGCCTCCCTGCCCCAGCTCCAACATGTGCCTAGGAAAGTGGC	TGCAGCCGGGAGGCTGCAAACACCTGCTGCCTCCCTGCCCCAGCTCCAACATGTGCCTAGGAAAGTGGC	KN287316.1_scaffold-13570	84115	1	1.84E-28	22:C>G	22	0.986631	0.97019	0.186992	0.813008	0.02981	0.157182	0.057843	0.304052	0.180948	5.9573	4.95	1	0	0	0	0	0	0	0	0	0	0	0	0	2	0	0	0	0	0	0	0	0	0	0	0	0	0	-	1	0
23113867|F|0-36:C>T-36:C>T	TGCAGCCGGTTGCAAAACTGGGGAGGGGTGGGGGGTCCCAGAGCACTAGCTGCATGAGCGGTTCAGCAG	TGCAGCCGGTTGCAAAACTGGGGAGGGGTGGGGGGTCCCAGAGCACTAGCTGCATG		0	0	999	36:C>T	36	0.997326	1	0.005362	0.994638	0	0.005362	0	0.010666	0.005333	8.29638	3.5	1	0	0	0	0	0	0	0	0	0	0	0	0	0	0	0	0	0	0	0	0	0	0	0	0	0	0	0	0	0
23113869|F|0-43:C>T-43:C>T	TGCAGCCGTCCCTGTTGCACTCACATGGGGCCTGAGCCCCACGCACTCCTGCCGGAGCAGCATGAGCGG	TGCAGCCGTCCCTGTTGCACTCACATGGGGCCTGAGCCCCACGCACTCCTGCCGGAGCAGCATG	KN278765.1_scaffold-1379	555116	1	9.81E-26	43:C>T	43	1	1	0.032086	0.967914	0	0.032086	0	0.062112	0.031056	8.64894	3.91667	1	0	0	0	0	0	0	0	0	0	0	0	0	0	0	0	0	0	0	0	0	0	0	0	0	0	0	0	0	0
23113875|F|0-45:C>A-45:C>A	TGCAGCCGTGCCTGGATCCCTAACCCTGGGGCCTTACAACCTGTGCGACTCGCATGGTCACAAGCATGA	TGCAGCCGTGCCTGGATCCCTAACCCTGGGGCCTTACAACCTGTGCGACTCGCATGGTCACAAGCATGA	KN286618.1_scaffold-12576	849	1	6.63E-28	45:C>A	45	0.986631	1	0.02439	0.97561	0	0.02439	0	0.047591	0.023795	7.45435	5.44444	1	2	0	0	0	0	0	2	0	0	0	0	0	0	0	0	0	0	0	0	0	0	0	0	0	0	0	0	0	0
23113880|F|0-19:C>T-19:C>T	TGCAGCCTAAAGATTCTGTCCCGAAGAAACGGGGACAGGGAAGTGCATGAGCGGTTCAGCAGGAATGCC	TGCAGCCTAAAGATTCTGTCCCGAAGAAACGGGGACAGGGAAGTGCATG	KN278893.1_scaffold-1563	31883	1	1.35E-17	19:C>T	19	0.981283	0.997275	0.043597	0.956403	0.002725	0.040872	0.005435	0.083392	0.044413	11.2603	6.83333	1	0	0	0	0	0	0	0	0	0	0	0	0	0	0	0	0	2	0	0	0	0	0	0	0	0	0	0	0	0
23113888|F|0-26:A>G-26:A>G	TGCAGCCTAGCATGACCAAAGCCTCTATGCATGTGTCTCTGTGTGCATGAGCGGTTCAGCAGGAATGCC	TGCAGCCTAGCATGACCAAAGCCTCTATGCATGTGTCTCTGTGTGCATG	KN288223.1_scaffold-14879	6474	1	1.35E-17	26:A>G	26	0.983957	0.994565	0.203804	0.796196	0.005435	0.19837	0.01081	0.324536	0.167673	13.73043	6.9375	1	0	0	0	0	0	2	0	0	2	0	0	0	0	0	0	0	0	0	0	0	2	2	2	0	0	0	0	2	0
23113916|F|0-14:G>C-14:G>C	TGCAGCCTCACTAAGACTGAGTAAAGCAGGAGGATGATGTCCCTGGTTTTGCTTGAGAAACATCGGTGG	TGCAGCCTCACTAAGACTGAGTAAAGCAGGAGGATGATGTCCCTGGTTTTGCTTGAGAAACATCGGTGG	KN284547.1_scaffold-9589	45654	10	1.84E-28	14:G>C	14	0.997326	0.997319	0.040214	0.959786	0.002681	0.037534	0.005348	0.077195	0.041271	9	5.88235	1	0	0	0	0	0	0	2	0	0	0	0	0	0	0	0	0	0	0	0	0	0	0	0	0	0	0	0	0	0
23113917|F|0-37:T>C-37:T>C	TGCAGCCTCACTAAGGCTGAGTAAAGCGAGAGGATGATGTCTCTAGTTTTGCTTGAGATGGATCAGTGG	TGCAGCCTCACTAAGGCTGAGTAAAGCGAGAGGATGATGTCTCTAGTTTTGCTTGAGATGGATCAGTGG	KN279287.1_scaffold-2120	20001	1	1.84E-28	37:T>C	37	0.997326	1	0.0563	0.9437	0	0.0563	0	0.106261	0.053131	9.98718	4.43478	1	0	0	0	0	0	0	0	0	0	0	0	0	0	0	0	0	0	0	0	0	0	0	0	0	0	0	0	0	0
23113919|F|0-46:T>C-46:T>C	TGCAGCCTCACTAATGCTGGGTAGAGTGGGAGAATCACTTCCTTGGTTTTGCTGGAGATGCACTGATTG	TGCAGCCTCACTAATGCTGGGTAGAGTGGGAGAATCACTTCCTTGGTTTTGCTGGAGATGCACTGATTG	KN285570.1_scaffold-11047	187159	10	1.84E-28	46:T>C	46	0.997326	0.978552	0.182306	0.817694	0.021448	0.160858	0.041975	0.298141	0.170058	9.09868	5.20225	1	0	0	0	0	0	0	0	2	0	0	0	0	0	0	0	0	0	0	0	0	0	0	0	0	0	0	0	0	0
23113920|F|0-20:T>G-20:T>G	TGCAGCCTCACTCAGCTCAATTCTCCAGTCGCCCCAGTGTCAGGTGGGGCATGAGCGGTTCAGCAGGAA	TGCAGCCTCACTCAGCTCAATTCTCCAGTCGCCCCAGTGTCAGGTGGGGCATG	KN286496.1_scaffold-12400	185107	1	9.08E-20	20:T>G	20	0.949198	1	0.002817	0.997183	0	0.002817	0	0.005618	0.002809	7.01869	3	1	0	0	0	0	0	0	0	0	0	0	0	0	0	0	0	0	0	0	0	0	0	0	0	0	0	0	0	0	0
23113926|F|0-23:C>A-23:C>A	TGCAGCCTCAGGATGAAGCCTGCCCAATCTCTTGGCAGGCCTGTGTGCATGAGCGGTTCAGCAGGAATG	TGCAGCCTCAGGATGAAGCCTGCCCAATCTCTTGGCAGGCCTGTGTGCATG	KN285131.1_scaffold-10412	86094	1	1.09E-18	23:C>A	23	0.975936	1	0.00274	0.99726	0	0.00274	0	0.005464	0.002732	8.73438	4	1	0	0	0	0	0	0	0	0	0	0	0	0	0	0	0	0	0	0	0	0	0	0	0	0	0	0	0	0	0
23113929|F|0-31:G>A-31:G>A	TGCAGCCTCATCAAGGCTGAGTAGAGAGGGAGGAGGACATTCTTAGACTTGCTTGAGATGCCTTGGTAG	TGCAGCCTCATCAAGGCTGAGTAGAGAGGGAGGAGGACATTCTTAGACTTGCTTGAGATGCCTTGGTAG	KN284973.1_scaffold-10193	490534	3	1.84E-28	31:G>A	31	0.983957	1	0.024457	0.975543	0	0.024457	0	0.047717	0.023858	8.39216	4.58333	1	0	0	0	0	0	0	0	0	0	0	0	0	0	0	0	0	2	2	0	0	0	0	0	0	0	0	0	0	0
23113931|F|0-9:A>C-9:A>C	TGCAGCCTCATTAGTGGGCATGAGCGGTTCAGCAGGAATGCCGAGACCGATCTCGTATGCCGTCTTCTG	TGCAGCCTCATTAGTGGGCATGAGCGGTTCAGCAGGAATGCCGAGACCGATCTCGTATGCCGTCTTCTG		0	0	999	9:A>C	9	0.97861	1	0.005464	0.994536	0	0.005464	0	0.010869	0.005435	5.90244	3	1	0	0	0	0	0	0	0	0	0	0	0	0	0	0	0	0	0	0	0	0	0	0	0	0	0	0	-	0	0
23118554|F|0-56:G>A-56:G>A	TGCAGCCTCCATGCTCTGGGCAGGGGTGTGCAGGCAGTGGATCATGGCTCTGCTCCGGTTCCTCCCAGC	TGCAGCCTCCATGCTCTGGGCAGGGGTGTGCAGGCAGTGGATCATGGCTCTGCTCCGGTTCCTCCCAGC	KN293625.1_scaffold-22852	21785	4	1.84E-28	56:G>A	56	0.967914	0.991713	0.058011	0.941989	0.008287	0.049724	0.016437	0.109292	0.062864	4.53778	3.24	1	0	0	0	2	0	0	0	0	-	0	-	-	0	0	0	0	0	0	0	0	0	0	0	0	0	0	0	0	0
23113948|F|0-52:A>G-52:A>G	TGCAGCCTCTACCAGGGCTCCAGCCAGGAAGCAGATGGGAGGGGCTAGCTCTACTATGGAGCAGAGAGC	TGCAGCCTCTACCAGGGCTCCAGCCAGGAAGCAGATGGGAGGGGCTAGCTCTACTATGGAGCAGAGAGC	KN291306.1_scaffold-19408	32403	1	1.84E-28	52:A>G	52	0.994652	1	0.005376	0.994624	0	0.005376	0	0.010695	0.005347	8.33191	4	1	0	0	0	0	0	0	0	0	0	0	0	0	0	0	0	0	0	0	0	0	0	0	0	0	0	0	0	0	0
23113959|F|0-58:C>T-58:C>T	TGCAGCCTCTTCCAGTTGTATTCACATACCATGCCCTAATGGCAACATAACTCATCCCCAGCGGACTCC	TGCAGCCTCTTCCAGTTGTATTCACATACCATGCCCTAATGGCAACATAACTCATCCCCAGCGGACTCC	KN288531.1_scaffold-15325	51646	1	1.84E-28	58:C>T	58	0.975936	0.99726	0.021918	0.978082	0.00274	0.019178	0.005464	0.042875	0.02417	4.73614	3.5	1	0	0	0	0	0	0	0	0	0	0	0	0	0	0	0	0	0	0	0	0	0	0	0	0	0	0	0	0	0
23113966|F|0-27:C>T-27:C>T	TGCAGCCTGACCACTGCTGCATAGGGGCGGAGGATCACCCCTTTAGCCCTGCTCGTGATGCATCTGTGG	TGCAGCCTGACCACTGCTGCATAGGGGCGGAGGATCACCCCTTTAGCCCTGCTCGTGATGCATCTGTGG	KN285174.1_scaffold-10471	50642	1	1.84E-28	27:C>T	27	1	0.997326	0.053476	0.946524	0.002674	0.050802	0.005333	0.101233	0.053283	8.62099	4.08	1	0	0	0	0	0	0	0	0	0	0	2	0	0	0	0	0	0	0	0	0	0	0	0	0	0	0	0	0	0
23111026|F|0-14:T>C-14:T>C	TGCAGCCTGATCAATGTTGCATAGAGGGGGAGGATCACCTCCTTGGACCTGCCTGAAATGCATCTGTGC	TGCAGCCTGATCAATGTTGCATAGAGGGGGAGGATCACCTCCTTGGACCTGCCTGAAATGCATCTGTGC	KN291904.1_scaffold-20272	2179	14	6.68E-23	14:T>C	14	0.997326	0.986595	0.230563	0.769437	0.013405	0.217158	0.02645	0.354807	0.190629	8.11957	4.75728	1	0	0	0	0	2	0	1	0	0	0	0	0	0	0	0	2	0	0	2	2	0	0	0	0	0	2	0	2	0
23113982|F|0-21:G>A-21:G>A	TGCAGCCTGCAAGGGGCAGAGGCCCTGATCACGCTCCTGCACTCCCTTTTGCATGAGCGGTTCAGCAGG	TGCAGCCTGCAAGGGGCAGAGGCCCTGATCACGCTCCTGCACTCCCTTTTGCATG	KN290069.1_scaffold-17576	138915	1	7.54E-21	21:G>A	21	0.994652	1	0.002688	0.997312	0	0.002688	0	0.005362	0.002681	11.39009	3	1	0	0	0	0	0	0	0	0	0	0	0	0	0	0	0	0	0	0	0	0	0	0	0	0	0	0	0	0	0
23113985|F|0-13:T>G-13:T>G	TGCAGCCTGCATGTTGGGCAGCAGCACGCAGACAGTGAGTTGTGGCTCTGCCCTGTCTTAGGAGCATGA	TGCAGCCTGCATGTTGGGCAGCAGCACGCAGACAGTGAGTTGTGGCTCTGCCCTGTCTTAGGAGCATGA	KN288748.1_scaffold-15634	67229	1	6.63E-28	13:T>G	13	1	0.983957	0.184492	0.815508	0.016043	0.168449	0.031571	0.300909	0.16624	12.34483	7.20988	1	2	2	0	0	0	2	2	0	0	0	0	0	0	0	0	0	0	0	0	0	0	2	2	2	0	2	2	2	2
23113987|F|0-27:A>T-27:A>T	TGCAGCCTGCCAGTGGATTGTGGAGGAAAGGTTTGTGGGTTCTGTGTCCCTCCAGCTCCCCTGGCCAGG	TGCAGCCTGCCAGTGGATTGTGGAGGAAAGGTTTGTGGGTTCTGTGTCCCTCCAGCTCCCCTGGCCAGG	KN291728.1_scaffold-20009	458348	1	1.84E-28	27:A>T	27	1	1	0.050802	0.949198	0	0.050802	0	0.096443	0.048221	9.25745	4.30435	1	0	0	0	0	0	0	0	0	0	0	0	0	0	0	0	0	0	0	0	0	0	0	0	0	0	0	0	0	0
23113988|F|0-18:A>G-18:A>G	TGCAGCCTGCCCACCCCAAACAGATCCAGGGGCACACACCCAACCCACCATGCCCTCCTGGGGTGCATG	TGCAGCCTGCCCACCCCAAACAGATCCAGGGGCACACACCCAACCCACCATGCCCTCCTGGGGTGCATG	KN289178.1_scaffold-16248	319379	1	1.84E-28	18:A>G	18	0.994652	1	0.002688	0.997312	0	0.002688	0	0.005362	0.002681	8.69397	3	1	0	0	0	0	0	0	0	0	2	0	0	0	0	0	0	0	0	0	0	0	0	0	0	0	0	0	0	0	0
23113990|F|0-41:C>A-41:C>A	TGCAGCCTGCCCCACCCCATGCAGGTTTGGGGGCACAGGCCCCTCCCCATGCCCTCCCAGTGTGCATGA	TGCAGCCTGCCCCACCCCATGCAGGTTTGGGGGCACAGGCCCCTCCCCATGCCCTCCCAGTGTGCATGA	KN280558.1_scaffold-3920	95950	1	6.63E-28	41:C>A	41	0.997326	0.997319	0.037534	0.962466	0.002681	0.034853	0.005348	0.072249	0.038799	10.65236	7.22222	1	0	0	0	0	0	0	0	0	0	0	0	0	0	0	0	0	0	0	0	0	0	0	0	0	0	0	0	0	0
23113991|F|0-7:T>A-7:T>A	TGCAGCCTGCCCTACACAGATCTGTGGGCACATGCTCCCCTCTGTGCCCTCATGGCCGAGTGGCATGAG	TGCAGCCTGCCCTACACAGATCTGTGGGCACATGCTCCCCTCTGTGCCCTCATGGCCGAGTGGCATGAG	KN286350.1_scaffold-12188	13372	1	2.38E-27	7:T>A	7	0.991979	1	0.002695	0.997305	0	0.002695	0	0.005376	0.002688	9.66739	3	1	0	0	0	0	0	0	0	0	0	0	0	0	0	0	0	0	0	0	0	0	0	0	0	0	0	0	0	0	0
23113994|F|0-35:A>G-35:A>G	TGCAGCCTGCCCTGCCCTGCCCTGCGCAGATCCAGAAGGCATGTGTTCCCCCCACCCCGCCCCACCGTG	TGCAGCCTGCCCTGCCCTGCCCTGCGCAGATCCAGAAGGCATGTGTTCCCCCCACCCCGCCCCACCGTG		0	0	999	35:A>G	35	0.588235	0.004545	1	0	0.995455	0.004545	0.00905	0	0.004525	6	4.83209	1	-	-	1	-	1	-	-	-	-	1	1	1	-	1	1	1	1	1	-	-	1	-	-	1	-	-	1	-	1
23114001|F|0-38:C>T-38:C>T	TGCAGCCTGCGGCGCCCTAACCCCGCTCCTGGGTGTCGCGCTGGCACTAGCCCCTTCTCTCTCAGTTTG	TGCAGCCTGCGGCGCCCTAACCCCGCTCCTGGGTGTCGCGCTGGCACTAGCCCCTTCTCTCTCAGTTTG	KN282764.1_scaffold-7041	280628	1	1.84E-28	38:C>T	38	0.983957	0.997283	0.029891	0.970109	0.002717	0.027174	0.00542	0.057996	0.031708	5.061	4	1	0	0	0	0	0	0	0	0	0	0	0	0	0	0	0	0	0	0	0	0	0	0	0	0	0	0	0	0	0
23114004|F|0-33:C>T-33:C>T	TGCAGCCTGCTGACACAGCCCTCCAGAATGCTGCCCCAGGAGCCTGTGACCAGCATGAGCGGTTCAGCA	TGCAGCCTGCTGACACAGCCCTCCAGAATGCTGCCCCAGGAGCCTGTGACCAGCATG	KN292252.1_scaffold-20787	30575	1	6.23E-22	33:C>T	33	1	0.919786	0.470588	0.529412	0.080214	0.390374	0.147559	0.49827	0.322915	7.15081	5.32735	1	2	0	0	0	0	0	2	0	0	2	2	2	0	0	2	0	0	0	0	2	2	0	0	2	0	1	2	2	2
23114012|F|0-33:T>A-33:T>A	TGCAGCCTGGCAGAGTTCCAGCCTTCATGGGGCTGGGGGGAGCAGGAGGAGGGTGGTCAGGTAGGGGGT	TGCAGCCTGGCAGAGTTCCAGCCTTCATGGGGCTGGGGGGAGCAGGAGGAGGGTGGTCAGGTAGGGGGT	KN281344.1_scaffold-5033	91069	9	1.84E-28	33:T>A	33	0.991979	1	0.016173	0.983827	0	0.016173	0	0.031822	0.015911	5.35421	2.85714	1	0	0	0	0	0	0	0	0	0	0	0	0	0	0	0	0	0	0	0	0	0	0	0	0	0	0	0	0	0
23114014|F|0-18:C>A-18:C>A	TGCAGCCTGGCAGTGCTGCCCGTAGCTCTGACTAGCCCTGCATGAGCGGTTCAGCAGGAATGCCGAGAC	TGCAGCCTGGCAGTGCTGCCCGTAGCTCTGACTAGCCCTGCATG	KN293238.1_scaffold-22263	127888	1	6.43E-15	18:C>A	18	0.933155	1	0.002865	0.997135	0	0.002865	0	0.005714	0.002857	7.22406	7	1	0	0	0	0	0	0	0	0	0	0	0	0	0	0	0	0	0	0	0	0	0	0	0	0	0	0	0	-	0
23114021|F|0-35:C>T-35:C>T	TGCAGCCTGGGACAGCCCCTTGGCCCCACCCTCTACCTTGAAGTGTCTCTGTAGGTCCCTCAGGCCCAG	TGCAGCCTGGGACAGCCCCTTGGCCCCACCCTCTACCTTGAAGTGTCTCTGTAGGTCCCTCAGGCCCAG	KN279402.1_scaffold-2275	237263	1	1.84E-28	35:C>T	35	1	1	0.09893	0.90107	0	0.09893	0	0.178286	0.089143	10.31197	4.86364	1	0	0	2	0	0	0	0	0	0	0	0	2	0	0	2	0	0	2	0	0	0	0	0	0	0	0	0	0	0
23114024|F|0-54:A>C-54:A>C	TGCAGCCTGGGGCACTGTGCATGGCCCTAGCCTGGCCCCATAGAAGTGATGCATAGCCCACATGCATGA	TGCAGCCTGGGGCACTGTGCATGGCCCTAGCCTGGCCCCATAGAAGTGATGCATAGCCCACATGCATGA	JRXG01075484.1_scaffold-15096_1	10137	1	6.63E-28	54:A>C	54	1	1	0.085561	0.914439	0	0.085561	0	0.156481	0.078241	11.34328	5.65	1	0	0	0	0	0	0	0	2	0	0	0	2	0	0	0	2	0	0	0	0	0	0	0	0	0	2	0	0	0
23114028|F|0-9:G>A-9:G>A	TGCAGCCTGGGTCCCAGGGCACAAGGATTTCTGTCAGTTACTGCATAAAGGGCATGAGCGGTTCAGCAG	TGCAGCCTGGGTCCCAGGGCACAAGGATTTCTGTCAGTTACTGCATAAAGGGCATG	KN288475.1_scaffold-15245	96000	3	2.17E-21	9:G>A	9	0.935829	1	0.011429	0.988571	0	0.011429	0	0.022596	0.011298	5.2877	3.5	1	0	0	0	-	0	0	0	0	0	0	0	0	2	0	0	0	0	0	0	0	0	0	0	0	0	-	0	0	0
23114034|F|0-28:G>A-28:G>A	TGCAGCCTGTATGACAGCCCCACGTGCCGGATTGTGCCAGCATGAGCGGTTCAGCAGGAATGCCGAGAC	TGCAGCCTGTATGACAGCCCCACGTGCCGGATTGTGCCAGCATG	KN290278.1_scaffold-17883	272372	1	6.43E-15	28:G>A	28	0.97861	0.997268	0.002732	0.997268	0.002732	0	0.00545	0.00545	0.00545	9.07269	5	1	0	0	0	0	0	0	0	0	0	0	0	0	0	0	0	0	0	0	0	0	0	0	0	0	0	0	0	0	0
23114036|F|0-19:C>T-19:C>T	TGCAGCCTGTCCCACTGATCTCCCCTCCCCCAGCCACATGCCCTCGCTGCCAGCCAGAACTAACCAGAG	TGCAGCCTGTCCCACTGATCTCCCCTCCCCCAGCCACATGCCCTCGCTGCCAGCCAGAACTAACCAGAG	KN283960.1_scaffold-8739	84181	1	1.84E-28	19:C>T	19	0.991979	0.991914	0.110512	0.889488	0.008086	0.102426	0.016042	0.196598	0.10632	7.10367	4.06	1	0	0	0	0	0	0	0	0	0	0	0	2	0	0	2	0	0	0	0	0	0	0	0	0	0	0	0	1	0
23114044|F|0-37:C>T-37:C>T	TGCAGCCTGTGTCCCTGAGCGCAGATGCAGGGGCACGCGCCCCCGCATGAGCGGTTCAGCAGGAATGCC	TGCAGCCTGTGTCCCTGAGCGCAGATGCAGGGGCACGCGCCCCCGCATG	KN279775.1_scaffold-2833	65352	1	1.35E-17	37:C>T	37	0.842246	0.996825	0.003175	0.996825	0.003175	0	0.006329	0.006329	0.006329	6.03675	4	1	0	0	0	0	-	-	0	0	0	0	-	0	0	0	0	0	0	0	-	0	0	0	0	0	-	0	0	-	0
23114045|F|0-6:C>A-6:C>A	TGCAGCCTGTGTGGCAGGAGGGGCTAGAAACCACCAGCAAGGTGCAAAAGCGGTTGCATGAGCGGTTCA	TGCAGCCTGTGTGGCAGGAGGGGCTAGAAACCACCAGCAAGGTGCAAAAGCGGTTGCATG	KN287393.1_scaffold-13684	126503	1	1.47E-23	6:C>A	6	1	1	0.002674	0.997326	0	0.002674	0	0.005333	0.002667	9.03404	3	1	0	0	0	0	0	0	0	0	0	0	0	0	0	0	0	0	0	0	0	0	0	0	0	0	0	0	0	0	0
23114049|F|0-35:G>A-35:G>A	TGCAGCCTGTTGCCTCTGCATGTGGTGCAAAGAGTGGTGCATGAGCGGTTCAGCAGGAATGCCGAGACC	TGCAGCCTGTTGCCTCTGCATGTGGTGCAAAGAGTGGTGCATG	KN289439.1_scaffold-16630	10161	1	2.19E-14	35:G>A	35	1	1	0.013369	0.986631	0	0.013369	0	0.026381	0.01319	13.51277	5.2	1	0	0	0	0	0	0	0	0	0	0	0	0	0	0	0	0	0	0	0	0	0	0	0	0	0	0	0	0	0
23114051|F|0-44:A>G-44:A>G	TGCAGCCTTAAACCCTGCTACCTCCACTGCATGTGTGTGCACACATGTGGGTGTGTGCATGAGCGGTTC	TGCAGCCTTAAACCCTGCTACCTCCACTGCATGTGTGTGCACACATGTGGGTGTGTGCATG	KN287634.1_scaffold-14043	30125	1	4.20E-24	44:A>G	44	1	0.989305	0.163102	0.836898	0.010695	0.152406	0.021162	0.272999	0.14708	13.24464	6.5493	1	0	0	0	0	0	2	0	2	0	0	0	2	2	0	2	0	2	2	0	0	0	0	0	0	0	0	0	0	0
23114056|F|0-14:G>C-14:G>C	TGCAGCCTTAGGCAGGGTAGCCATGAGGAGTTGTATGTGTGAGCAACCCTGGGCTCCTGGCCTAGGCCA	TGCAGCCTTAGGCAGGGTAGCCATGAGGAGTTGTATGTGTGAGCAACCCTGGGCTCCTGGCCTAGGCCA	KN281581.1_scaffold-5371	149164	1	1.84E-28	14:G>C	14	0.997326	0.997319	0.085791	0.914209	0.002681	0.08311	0.005348	0.156862	0.081105	10.23555	5.71053	1	0	0	0	0	0	0	0	0	0	0	2	2	0	0	2	0	0	0	0	0	0	2	0	0	0	2	0	0	0
23114058|F|0-30:A>T-30:A>T	TGCAGCCTTAGTGCCCCACCATACATACACACACACACCACCTTCCAGCCTACTTGTATCCAGGTGCTC	TGCAGCCTTAGTGCCCCACCATACATACACACACACACCACCTTCCAGCCTACTTGTATCCAGGTGCTC	KN285340.1_scaffold-10725	34773	1	1.84E-28	30:A>T	30	1	0.997326	0.066845	0.933155	0.002674	0.064171	0.005333	0.124753	0.065043	6.44111	4.10345	1	0	0	0	0	0	0	0	0	0	0	0	0	0	0	0	0	0	0	0	0	0	0	0	0	0	0	0	0	0
23114059|F|0-29:C>T-29:C>T	TGCAGCCTTCACAGGGCTAGGTGTACAGGCGGTGCATGTGCTTCCCCTGCACATGCATGAGCGGTTCAG	TGCAGCCTTCACAGGGCTAGGTGTACAGGCGGTGCATGTGCTTCCCCTGCACATGCATG	KN279807.1_scaffold-2878	9361	1	5.12E-23	29:C>T	29	1	1	0.010695	0.989305	0	0.010695	0	0.021162	0.010581	13.12553	3	1	0	0	0	0	0	0	0	0	0	0	0	0	0	0	0	0	0	0	0	0	0	0	0	0	0	0	0	0	0
23114066|F|0-8:T>G-8:T>G	TGCAGCCTTGAGCTGCTTCTCTTTGCTCGAGCGCGCTGAGGCAGCATGGGCATGAGCGGTTCAGCAGGA	TGCAGCCTTGAGCTGCTTCTCTTTGCTCGAGCGCGCTGAGGCAGCATGGGCATG	KN291086.1_scaffold-19085	203181	1	2.62E-20	8:T>G	8	0.92246	1	0.002899	0.997101	0	0.002899	0	0.00578	0.00289	7.25467	3	1	0	0	0	0	0	0	0	0	0	0	0	0	0	0	0	0	0	0	0	0	0	0	0	0	0	0	0	0	0
23114067|F|0-36:C>G-36:C>G	TGCAGCCTTGATGTATGTGGTGGAAGTGGTGGGATCCCTGCTCTGGGGCCTCTCTCACACCCGTGTTTG	TGCAGCCTTGATGTATGTGGTGGAAGTGGTGGGATCCCTGCTCTGGGGCCTCTCTCACACCCGTGTTTG	KN286778.1_scaffold-12811	159373	1	1.84E-28	36:C>G	36	0.989305	1	0.002703	0.997297	0	0.002703	0	0.005391	0.002695	5.74617	6	1	0	0	0	-	0	0	0	0	0	0	0	0	0	0	0	0	0	0	0	0	0	0	0	0	0	0	0	0	0
23114079|F|0-27:G>C-27:G>C	TGCAGCCTTTAGGAAACCGTAATATATGCCAGGGGACTGGCACCACACACAATAATCCTTGGATGGGCG	TGCAGCCTTTAGGAAACCGTAATATATGCCAGGGGACTGGCACCACACACAATAATCCTTGGATGGGCG	KN292896.1_scaffold-21741	366718	1	1.84E-28	27:G>C	27	0.965241	1	0.00277	0.99723	0	0.00277	0	0.005525	0.002762	4.04444	3	1	0	0	0	0	0	0	0	0	0	0	0	0	0	0	0	0	0	0	0	0	0	0	0	0	0	0	0	0	0
23114081|F|0-26:T>C-26:T>C	TGCAGCCTTTCCCTGCCCCTATTTGCTCCAGCGGGCTGTGGCAGCATGAGCGGTTCAGCAGGAATGCCG	TGCAGCCTTTCCCTGCCCCTATTTGCTCCAGCGGGCTGTGGCAGCATG	KN279667.1_scaffold-2684	174890	1	4.65E-17	26:T>C	26	0.989305	1	0.002703	0.997297	0	0.002703	0	0.005391	0.002695	8.12148	3	1	0	0	0	0	0	-	0	0	0	0	0	0	0	0	0	0	0	0	0	0	0	0	0	0	0	0	0	0	0
23114082|F|0-68:A>C-68:A>C	TGCAGCCTTTGCACAAGGCAAGATTATGTCTGCATTGTCTCTAGGAAGCTGATCTCATGCTGGTAGGCA	TGCAGCCTTTGCACAAGGCAAGATTATGTCTGCATTGTCTCTAGGAAGCTGATCTCATGCTGGTAGGCA	KN283959.1_scaffold-8738	65355	1	1.84E-28	68:A>C	68	0.951872	0.997191	0.005618	0.994382	0.002809	0.002809	0.005602	0.011173	0.008388	5.85261	4	1	0	0	0	0	0	0	0	0	0	0	0	0	0	0	0	0	0	0	0	0	0	0	0	0	0	0	0	2	0
23114090|F|0-31:G>A-31:G>A	TGCAGCGACGGCTCTCAAACCCTCAGTCTCCGGCATGAGCGGTTCAGCAGGAATGCCGAGACCGATCTC	TGCAGCGACGGCTCTCAAACCCTCAGTCTCCGGCATG	KN290623.1_scaffold-18392	135844	1	3.16E-11	31:G>A	31	0.991979	0.97035	0.12938	0.87062	0.02965	0.09973	0.057541	0.225282	0.141411	12.28508	8.41818	1	2	1	0	0	0	0	0	0	2	0	2	0	2	0	0	0	2	2	0	2	0	0	2	2	0	0	0	0	0
23114094|F|0-5:C>T-5:C>T	TGCAGCGAGAGAGCTACTGCTTGCTTCCCCTGTTCCGTGCATGAGCGGTTCAGCAGGAATGCCGAGACC	TGCAGCGAGAGAGCTACTGCTTGCTTCCCCTGTTCCGTGCATG	KN287242.1_scaffold-13464	144137	1	2.19E-14	5:C>T	5	1	1	0.037433	0.962567	0	0.037433	0	0.072064	0.036032	12.52766	8	1	0	0	0	0	0	0	0	0	0	0	0	0	0	0	0	0	0	0	0	0	0	0	0	0	0	0	0	0	0
23114100|F|0-55:G>C-55:G>C	TGCAGCGAGGAAGCAGAGGGGAGGGGCCAGCGCTGCTGTGCAGCAAAGAGTCATGGCCAGCCCAGAGAG	TGCAGCGAGGAAGCAGAGGGGAGGGGCCAGCGCTGCTGTGCAGCAAAGAGTCATGGCCAGCCCAGAGAG	KN281198.1_scaffold-4821	108648	2	1.84E-28	55:G>C	55	1	0.97861	0.256684	0.743316	0.02139	0.235294	0.041866	0.381595	0.21173	9.76419	5.98347	1	0	2	0	0	0	0	0	0	0	0	0	0	0	0	1	0	0	0	0	0	0	0	0	0	0	0	0	0	0
23114103|F|0-35:A>G-35:A>G	TGCAGCGAGGCTCCAGACGGCCCGGATCTGCTTTGAAGCAGTGCATGAGCGGTTCAGCAGGAATGCCGA	TGCAGCGAGGCTCCAGACGGCCCGGATCTGCTTTGAAGCAGTGCATG	KN289771.1_scaffold-17131	97535	1	1.60E-16	35:A>G	35	0.986631	0.99729	0.01084	0.98916	0.00271	0.00813	0.005405	0.021445	0.013425	8.32088	4.25	1	0	0	0	0	0	0	0	0	0	0	0	0	0	0	0	0	0	0	0	0	0	0	0	0	0	0	0	0	0
23114112|F|0-43:G>C-43:G>C	TGCAGCGATTGTGCCATGCAGAGCCTGGCTGGCAGTGGAGTGAGGCTCTGGGCAGGACGGCTCTACTTT	TGCAGCGATTGTGCCATGCAGAGCCTGGCTGGCAGTGGAGTGAGGCTCTGGGCAGGACGGCTCTACTTT	KN279731.1_scaffold-2768	269371	2	1.84E-28	43:G>C	43	1	1	0.016043	0.983957	0	0.016043	0	0.031571	0.015785	7.6951	5.16667	1	0	0	0	0	0	0	0	0	0	0	0	0	0	0	0	0	0	0	0	0	0	0	0	0	0	0	0	0	0
23114125|F|0-16:G>A-16:G>A	TGCAGCGCCAAATACCGCATATGTAGGCATTCCATGCCAAAAGAGAAGTGGCGCGGCGCACACGACGGC	TGCAGCGCCAAATACCGCATATGTAGGCATTCCATGCCAAAAGAGAAGTGGCGCGGCGCACACGACGGC	KN277792.1_scaffold-18	154711	1	8.58E-27	16:G>A	16	1	0.807487	0.652406	0.347594	0.192513	0.459893	0.310904	0.453545	0.382224	8.17539	6.28197	1	1	2	2	2	0	1	2	0	1	1	0	2	2	2	2	2	1	1	0	0	2	0	2	2	1	1	2	0	0
23114133|F|0-17:C>T-17:C>T	TGCAGCGCCTCGCTCCTCGTAACTCATCGAAGGGACACCCCGGCTGGAGGGAAGCATGAGCGGTTCAGC	TGCAGCGCCTCGCTCCTCGTAACTCATCGAAGGGACACCCCGGCTGGAGGGAAGCATG	KN290523.1_scaffold-18243	32186	1	1.79E-22	17:C>T	17	1	1	0.010695	0.989305	0	0.010695	0	0.021162	0.010581	14.15745	7.5	1	0	0	0	0	0	0	0	0	0	0	0	0	0	0	0	0	0	0	0	0	0	0	0	0	0	0	0	0	0
23114136|F|0-18:A>G-18:A>G	TGCAGCGCGGCCTGGTCCACCTCACACGCCTCTGCATGAGCGGTTCAGCAGGAATGCCGAGACCGATCT	TGCAGCGCGGCCTGGTCCACCTCACACGCCTCTGCATG	KN291302.1_scaffold-19404	85481	2	4.43E-10	18:A>G	18	0.97861	0.016393	1	0	0.983607	0.016393	0.032249	0	0.016125	9	9.15929	1	1	1	1	1	1	1	1	1	1	1	1	1	1	1	1	1	1	1	1	1	1	1	1	1	1	1	1	1	1
23114139|F|0-45:C>T-45:C>T	TGCAGCGCGTTTGGCAGCAGACCCAGAAGTGGACCAGAAGCACTTCCAGTCTGCTTCCGGGTCCACCAG	TGCAGCGCGTTTGGCAGCAGACCCAGAAGTGGACCAGAAGCACTTCCAGTCTGCTTCCGGGTCCACCAG	KN286743.1_scaffold-12760	55081	11	1.84E-28	45:C>T	45	1	1	0.013369	0.986631	0	0.013369	0	0.026381	0.01319	10.20851	4.5	1	0	0	0	0	0	0	2	0	0	0	0	0	0	0	0	0	0	0	0	0	0	0	0	0	0	0	0	0	0
23114144|F|0-13:C>T-13:C>T	TGCAGCGCTCCTCCGCACCTGCCCTCTCCCTGCCCAGTGCCTGGAGCAAGCCGGAGGCTGGGGAAGGCA	TGCAGCGCTCCTCCGCACCTGCCCTCTCCCTGCCCAGTGCCTGGAGCAAGCCGGAGGCTGGGGAAGGCA	KN290774.1_scaffold-18604	237443	1	1.84E-28	13:C>T	13	1	1	0.050802	0.949198	0	0.050802	0	0.096443	0.048221	12.15532	4.86957	1	0	0	0	0	0	0	0	0	0	0	0	0	0	0	0	0	0	0	0	0	0	0	0	0	0	0	0	0	0
23114147|F|0-28:A>G-28:A>G	TGCAGCGCTGCTCCAGGTGGCCCAGCTGAACCTTTGAGCAGTGCATGAGCGGTTCAGCAGGAATGCCGA	TGCAGCGCTGCTCCAGGTGGCCCAGCTGAACCTTTGAGCAGTGCATG	KN281131.1_scaffold-4711	253644	1	1.60E-16	28:A>G	28	1	0.86631	0.459893	0.540107	0.13369	0.326203	0.231634	0.496783	0.364208	9.94866	8.21759	1	0	1	2	1	2	2	2	0	2	0	1	0	2	1	1	0	1	1	1	0	0	0	0	2	0	2	0	1	1
23114151|F|0-23:G>C-23:G>C	TGCAGCGCTGTCCCTCACCACGGGGGCCTCGATCTAGCCCCTGCCCACGGTCTGACCTGCTGGGCTAGG	TGCAGCGCTGTCCCTCACCACGGGGGCCTCGATCTAGCCCCTGCCCACGGTCTGACCTGCTGGGCTAGG	KN292032.1_scaffold-20467	95852	1	1.84E-28	23:G>C	23	1	1	0.002674	0.997326	0	0.002674	0	0.005333	0.002667	8.6	3	1	0	0	0	0	0	0	0	0	0	0	0	0	0	0	0	0	0	0	0	0	0	0	0	0	0	0	0	0	0
23114157|F|0-25:C>T-25:C>T	TGCAGCGGACAGCCCAGCTCTGACCCACGGGGGCACATGCACCACATGAATCCTCCAGGGGTGCATGAG	TGCAGCGGACAGCCCAGCTCTGACCCACGGGGGCACATGCACCACATGAATCCTCCAGGGGTGCATGAG	KN278297.1_scaffold-710	8554	1	2.38E-27	25:C>T	25	1	1	0.013369	0.986631	0	0.013369	0	0.026381	0.01319	10.62766	4.57143	1	0	0	0	0	0	0	0	0	0	0	0	0	0	0	0	0	0	0	0	0	0	0	0	0	0	0	0	0	0
23114159|F|0-8:A>G-8:A>G	TGCAGCGGACCTGATCTAGGGGCGAAGGTGGGGGGGCAGCATGAGCGGTTCAGCAGGAATGCCGAGACC	TGCAGCGGACCTGATCTAGGGGCGAAGGTGGGGGGGCAGCATG	JRXG01096697.1_scaffold-19725_1	1379	1	2.19E-14	8:A>G	8	0.951872	1	0.019663	0.980337	0	0.019663	0	0.038553	0.019276	6.67523	4.625	1	0	0	0	0	0	-	0	0	0	0	0	0	0	0	0	0	0	0	0	0	0	0	0	0	0	-	0	-	0
23114163|F|0-36:G>A-36:G>A	TGCAGCGGCAATTCTGCTGCACAGAGGCTGGCTGGCGAGCTAGCTCCACTTTTGAGCGGCACATGCTGC	TGCAGCGGCAATTCTGCTGCACAGAGGCTGGCTGGCGAGCTAGCTCCACTTTTGAGCGGCACATGCTGC	KN282525.1_scaffold-6670	24150	1	1.84E-28	36:G>A	36	0.997326	1	0.002681	0.997319	0	0.002681	0	0.005348	0.002674	8.15598	4	1	0	0	0	0	0	0	0	0	0	0	0	0	0	0	0	2	0	0	0	0	0	0	0	0	0	0	0	0	0
23114169|F|0-12:C>T-12:C>T	TGCAGCGGCAGCCTGCTCTTGCCCTGTGCTCATATCCGGGGGCACACACCTCCCAGGGTGTATGCAGTG	TGCAGCGGCAGCCTGCTCTTGCCCTGTGCTCATATCCGGGGGCACACACCTCCCAGGGTGTATGCAGTG	KN293627.1_scaffold-22854	303892	1	1.84E-28	12:C>T	12	1	1	0.005348	0.994652	0	0.005348	0	0.010638	0.005319	7.33333	3	1	0	0	0	0	0	0	0	0	0	2	0	0	0	0	0	0	0	0	0	0	0	0	0	0	0	0	0	0	0
23114171|F|0-6:G>T-6:G>T	TGCAGCGGCAGCTTACCCTCAGCCCCATGCACAGGTCTGGGGGTACAAGCCTCCCTTGCCCTCCTGGGG	TGCAGCGGCAGCTTACCCTCAGCCCCATGCACAGGTCTGGGGGTACAAGCCTCCCTTGCCCTCCTGGGG	KN289638.1_scaffold-16935	131642	1	1.84E-28	6:G>T	6	1	1	0.005348	0.994652	0	0.005348	0	0.010638	0.005319	12.10638	2.33333	1	0	0	0	0	0	0	0	0	0	0	0	0	0	0	0	0	0	0	0	0	0	0	0	0	0	0	0	0	0
23114179|F|0-28:G>A-28:G>A	TGCAGCGGGAGCGACGCGTGCGCAGCACGGAGGGTGCTCGGCTGCGCTTCCCGTTCCCGGCATGAGCGG	TGCAGCGGGAGCGACGCGTGCGCAGCACGGAGGGTGCTCGGCTGCGCTTCCCGTTCCCGGCATG	KN288580.1_scaffold-15392	4048	1	9.81E-26	28:G>A	28	0.930481	1	0.008621	0.991379	0	0.008621	0	0.017093	0.008546	6.78043	2.33333	1	0	0	0	-	-	0	0	0	0	0	0	-	0	0	0	0	0	0	0	0	0	0	0	0	-	0	-	0	0
23114187|F|0-64:C>T-64:C>T	TGCAGCGGGCAGCCTGCACCCACCCTGCACACAGATCTGGTGGGCACAGGTCCCCCTACTCCCCCGGGA	TGCAGCGGGCAGCCTGCACCCACCCTGCACACAGATCTGGTGGGCACAGGTCCCCCTACTCCCCCGGGA	KN286606.1_scaffold-12560	14321	2	1.84E-28	64:C>T	64	1	1	0.013369	0.986631	0	0.013369	0	0.026381	0.01319	10.55246	4.6	1	0	0	0	0	0	0	0	0	0	0	0	0	0	0	0	0	0	0	0	0	0	0	0	0	0	0	0	0	2
23114192|F|0-20:A>C-20:A>C	TGCAGCGGGCGCGCTGCTGAAGGGGCGATGCAAGGGTCTGGGGCCGCCATTCAGCCCCTGGCCCGAGGA	TGCAGCGGGCGCGCTGCTGAAGGGGCGATGCAAGGGTCTGGGGCCGCCATTCAGCCCCTGGCCCGAGGA	KN278793.1_scaffold-1422	2836	1	1.84E-28	20:A>C	20	0.997326	0.989276	0.085791	0.914209	0.010724	0.075067	0.021218	0.156862	0.08904	9.59267	8.07692	1	0	0	0	0	0	0	0	0	0	0	0	0	0	0	0	0	0	0	0	0	0	0	0	0	0	0	0	0	0
23114194|F|0-19:A>G-19:A>G	TGCAGCGGGCTCGAGACGCACAAAGGCAGAGCGACTTCCTCAGCATGAGCGGTTCAGCAGGAATGCCGA	TGCAGCGGGCTCGAGACGCACAAAGGCAGAGCGACTTCCTCAGCATG	KN293570.1_scaffold-22766	303879	1	1.60E-16	19:A>G	19	1	1	0.013369	0.986631	0	0.013369	0	0.026381	0.01319	11.78936	6.8	1	0	0	0	0	0	0	0	0	0	0	0	0	0	0	0	0	0	0	0	0	0	0	0	0	0	0	0	0	0
23114205|F|0-66:G>A-66:G>A	TGCAGCGGTATTGTCGGGCGTTGTTGAAGGTGGCCCATGAGCTTCCCATGGGCGGGCAACTAGGCCGGG	TGCAGCGGTATTGTCGGGCGTTGTTGAAGGTGGCCCATGAGCTTCCCATGGGCGGGCAACTAGGCCGGG	KN286937.1_scaffold-13040	296307	5	1.84E-28	66:G>A	66	1	0.986631	0.181818	0.818182	0.013369	0.168449	0.026381	0.297521	0.161951	8.66667	5.22472	1	0	0	0	0	0	0	2	0	0	0	0	0	0	0	0	0	0	0	2	2	0	0	0	2	0	0	0	2	0
23114208|F|0-16:G>T-16:G>T	TGCAGCGGTGTCATTGGGGGGGGCACAGCAGAAGTGAGTGGGGAGCTTCTGCATGAGCGGTTCAGCAGG	TGCAGCGGTGTCATTGGGGGGGGCACAGCAGAAGTGAGTGGGGAGCTTCTGCATG	KN279889.1_scaffold-2988	55689	1	7.54E-21	16:G>T	16	1	1	0.045455	0.954545	0	0.045455	0	0.086777	0.043388	8.40171	5.05556	1	0	0	0	0	0	0	0	0	0	0	0	2	0	0	2	0	0	0	0	0	0	0	0	0	0	0	0	0	0
23114211|F|0-23:A>G-23:A>G	TGCAGCGTAACCTCCATGGGGAGACAATACTCTGTCCATTAGCCGCTGGAATGTAGCCGCAGCTCCATG	TGCAGCGTAACCTCCATGGGGAGACAATACTCTGTCCATTAGCCGCTGGAATGTAGCCGCAGCTCCATG	KN279960.1_scaffold-3090	8320	2	1.84E-28	23:A>G	23	0.994652	1	0.05914	0.94086	0	0.05914	0	0.111285	0.055642	10.57906	5.85294	1	0	0	0	0	0	0	0	0	0	0	0	0	2	0	0	0	0	0	0	0	0	0	0	0	0	0	0	0	0
23111029|F|0-28:A>G-28:A>G	TGCAGCGTCTGCATGTGAGTTACTGTGCAGTAACTACTCATGAGTAAATTTGCTACTTGCATTTACAGG	TGCAGCGTCTGCATGTGAGTTACTGTGCAGTAACTACTCATGAGTAAATTTGCTACTTGCATTTACAGG	KN280157.1_scaffold-3372	208749	6	1.84E-28	28:A>G	28	1	1	0.010695	0.989305	0	0.010695	0	0.021162	0.010581	9.85928	3	1	0	0	0	0	0	0	0	0	0	0	0	0	0	0	0	0	0	0	0	0	0	0	0	0	0	0	0	0	0
23114223|F|0-32:T>C-32:T>C	TGCAGCGTCTTGGGCTCTGGGCACTGACCAGCTGAGGAAGGGAGAAAGCTGAGCATGAGCGGTTCAGCA	TGCAGCGTCTTGGGCTCTGGGCACTGACCAGCTGAGGAAGGGAGAAAGCTGAGCATG	KN283570.1_scaffold-8195	29640	1	6.23E-22	32:T>C	32	1	1	0.018717	0.981283	0	0.018717	0	0.036733	0.018366	11.37393	4.71429	1	0	0	0	0	0	0	0	0	0	0	0	0	0	0	0	0	0	0	0	0	0	0	0	0	0	0	0	0	0
23114226|F|0-15:C>T-15:C>T	TGCAGCGTGAGAGAGCCAGACTCTGCCGTCTCCGATACATGCACATAATCACATTGGCTTCAGTGGATG	TGCAGCGTGAGAGAGCCAGACTCTGCCGTCTCCGATACATGCACATAATCACATTGGCTTCAGTGGATG	KN286995.1_scaffold-13126	99952	1	8.58E-27	15:C>T	15	1	0.836898	0.622995	0.377005	0.163102	0.459893	0.272999	0.469745	0.371372	9.323	9.18367	1	0	0	0	0	2	2	0	0	0	1	2	2	1	2	2	2	0	0	0	0	2	0	0	2	1	2	2	2	2
23114234|F|0-62:A>T-62:A>T	TGCAGCGTGGAGGGGAAGCCCTCCCCTCAAGGCTGGCAAAGTGGGGGCAGGGCTGTGTCTGGAGCCTGG	TGCAGCGTGGAGGGGAAGCCCTCCCCTCAAGGCTGGCAAAGTGGGGGCAGGGCTGTGTCTGGAGCCTGG	KN292199.1_scaffold-20704	75108	1	1.84E-28	62:A>T	62	1	1	0.02139	0.97861	0	0.02139	0	0.041866	0.020933	8.03419	5.3	1	0	0	0	0	0	0	0	0	0	0	0	0	2	0	0	0	0	0	0	0	0	0	0	0	0	0	0	0	0
23114240|F|0-37:C>G-37:C>G	TGCAGCGTGGGGCACAGAGCACAGCCCCAGCCCAGCCCCATAACAGCGGCATGGAGCTAGCATCACTGC	TGCAGCGTGGGGCACAGAGCACAGCCCCAGCCCAGCCCCATAACAGCGGCATGGAGCTAGCATCACTGC	KN291501.1_scaffold-19681	66991	3	1.84E-28	37:C>G	37	0.994652	1	0.008065	0.991935	0	0.008065	0	0.015999	0.007999	6.69528	3.5	1	0	0	0	0	0	0	0	0	2	0	0	0	0	0	0	0	0	0	0	0	0	0	0	0	0	0	0	0	0
23110454|F|0-5:T>C-5:T>C	TGCAGTGTAGTGTAGAGCATGTGGGGAGGTATGATGTGGGCTGCCTGGGTGGGTGGCACATGGGGAATG	TGCAGTGTAGTGTAGAGCATGTGGGGAGGTATGATGTGGGCTGCCTGGGTGGGTGGCACATGGGGAATG	JRXG01062194.1_scaffold-12274_1	5124	1	1.84E-28	5:T>C	5	1	0.852941	0.569519	0.430481	0.147059	0.42246	0.250865	0.490334	0.3706	10.95739	7.71642	1	0	0	2	2	0	2	0	2	0	2	2	2	2	0	0	0	1	2	0	0	0	0	0	0	0	2	0	0	1
23114245|F|0-19:G>A-19:G>A	TGCAGCGTGTCCTCCCTTCGCTCCAGACAGCAGAGCTCCCAGATCCAGCATGAGCGGTTCAGCAGGAAT	TGCAGCGTGTCCTCCCTTCGCTCCAGACAGCAGAGCTCCCAGATCCAGCATG	KN284326.1_scaffold-9274	63103	1	3.14E-19	19:G>A	19	0.989305	1	0.02973	0.97027	0	0.02973	0	0.057692	0.028846	11.92473	5.76923	1	0	0	0	0	0	0	0	0	0	0	0	0	2	0	0	0	0	0	0	0	0	0	0	0	0	0	0	0	2
23114249|F|0-21:G>T-21:G>T	TGCAGCGTTGCCTGACTCAGGGTCTGTGTGGGGAGAATGGGCCCAGACCGACCCAACCTGACCTGGCCC	TGCAGCGTTGCCTGACTCAGGGTCTGTGTGGGGAGAATGGGCCCAGACCGACCCAACCTGACCTGGCCC	KN282353.1_scaffold-6434	94141	1	1.84E-28	21:G>T	21	0.997326	0.959786	0.134048	0.865952	0.040214	0.093834	0.077195	0.232159	0.154677	9.34444	5.5873	1	0	0	0	2	0	1	0	0	0	0	1	0	0	0	0	0	0	0	0	0	0	0	0	0	0	0	0	0	0
23114250|F|0-16:A>C-16:A>C	TGCAGCGTTTTGATCAATGCACGCTCCTTCTTGATGGCTAAACAGGCCGTCTCACGACTGTGGAGCATG	TGCAGCGTTTTGATCAATGCACGCTCCTTCTTGATGGCTAAACAGGCCGTCTCACGACTGTGGAGCATG	KN280152.1_scaffold-3366	18860	1	1.84E-28	16:A>C	16	1	1	0.008021	0.991979	0	0.008021	0	0.015914	0.007957	13.40638	7.75	1	0	0	0	0	0	0	0	0	0	0	0	0	0	0	0	0	0	0	0	0	0	0	0	0	0	0	0	0	0
23114262|F|0-23:T>G-23:T>G	TGCAGCTAAGTCAGAACAAGAAGTTTGACACAGAGAGCTGCATGAGCGGTTCAGCAGGAATGCCGAGAC	TGCAGCTAAGTCAGAACAAGAAGTTTGACACAGAGAGCTGCATG	KN287641.1_scaffold-14052	279095	1	6.43E-15	23:T>G	23	0.97861	1	0.002732	0.997268	0	0.002732	0	0.00545	0.002725	9.54013	3	1	0	0	0	0	0	0	0	0	0	0	0	0	0	0	0	0	0	0	0	0	0	0	0	0	0	0	0	0	0
23114263|F|0-23:T>G-23:T>G	TGCAGCTAATGGCTGAGAAATAATCAGCCTAATAGCAGGCAACCATGGATCCTTCTGCATGAGCGGTTC	TGCAGCTAATGGCTGAGAAATAATCAGCCTAATAGCAGGCAACCATGGATCCTTCTGCATG	KN285935.1_scaffold-11571	335869	1	4.20E-24	23:T>G	23	0.997326	1	0.002681	0.997319	0	0.002681	0	0.005348	0.002674	10.41756	3	1	0	0	0	0	0	0	0	0	0	0	0	0	0	0	0	2	0	0	0	0	0	0	0	0	0	0	0	0	0
23114265|F|0-52:G>T-52:G>T	TGCAGCTAATTCCCCCAGTACTCTAGGGTGGAGATTGTCCGGACCAACCAATGTGAATAAATCCAGTCC	TGCAGCTAATTCCCCCAGTACTCTAGGGTGGAGATTGTCCGGACCAACCAATGTGAATAAATCCAGTCC	KN285534.1_scaffold-10996	172681	10	8.58E-27	52:G>T	52	0.975936	0.00274	1	0	0.99726	0.00274	0.005464	0	0.002732	6	4.57174	1	1	1	1	1	1	1	1	1	1	1	1	1	1	1	1	1	1	1	1	1	1	1	-	1	1	1	1	1	1
23114271|F|0-59:C>A-59:C>A	TGCAGCTACAGGTTCCACATGATAGGACAGAACTGGCCCTGGCAAAGAGCACAGCCCAGCAGCTTGGAG	TGCAGCTACAGGTTCCACATGATAGGACAGAACTGGCCCTGGCAAAGAGCACAGCCCAGCAGCTTGGAG	KN287220.1_scaffold-13437	4339	1	1.84E-28	59:C>A	59	0.973262	1	0.002747	0.997253	0	0.002747	0	0.005479	0.00274	6.45759	3	1	0	0	0	0	0	0	0	0	0	0	0	0	0	0	0	0	0	0	0	0	0	0	0	0	0	0	-	-	0
23110302|F|0-60:T>G-60:T>G	TGCAGCTACAGTCAGAGGGTAGAGGGGAGAGACCAGCCCTACTATGGAGCAGAGAGCCCTTCCCAACCC	TGCAGCTACAGTCAGAGGGTAGAGGGGAGAGACCAGCCCTACTATGGAGCAGAGAGCCCTTCCCAACCC	KN288014.1_scaffold-14588	331453	1	8.58E-27	60:T>G	60	0.78877	0.60678	0.559322	0.440678	0.39322	0.166102	0.477196	0.492962	0.485079	6.09217	4.97101	1	1	0	1	2	0	2	1	1	0	0	0	0	-	-	0	0	1	1	-	2	0	0	0	0	-	0	0	1	0
23114272|F|0-43:A>C-43:A>C	TGCAGCTACATATTAATTGTTGCTAAATGCTGAAGTGGGTATCATGCGGCATGAGCGGTTCAGCAGGAA	TGCAGCTACATATTAATTGTTGCTAAATGCTGAAGTGGGTATCATGCGGCATG	KN279408.1_scaffold-2286	346066	1	9.08E-20	43:A>C	43	0.949198	1	0.033803	0.966197	0	0.033803	0	0.06532	0.03266	9.44244	4.38462	1	0	0	0	0	0	0	0	0	0	0	0	0	0	0	0	0	0	0	0	0	-	0	0	0	0	0	0	0	0
23114273|F|0-54:T>C-54:T>C	TGCAGCTACATGATCAGTTTCTGGCATGGGGCTAGGGATAACCTTGGAGTCATATGTCCAAGTTGGAGC	TGCAGCTACATGATCAGTTTCTGGCATGGGGCTAGGGATAACCTTGGAGTCATATGTCCAAGTTGGAGC	JRXG01032085.1_scaffold-6144_1	812	1	8.58E-27	54:T>C	54	1	0.756684	0.724599	0.275401	0.243316	0.481283	0.368226	0.399111	0.383668	7.96	7.70262	1	2	2	2	2	0	1	2	1	2	2	2	2	1	2	2	2	0	0	1	0	2	2	1	0	2	2	2	0	1
23114278|F|0-8:C>T-8:C>T	TGCAGCTACGCCTGTGGCACTTTGCAGGGGCCAAGCCCCAGGTCCAAGCCAGTGCATGAGCGGTTCAGC	TGCAGCTACGCCTGTGGCACTTTGCAGGGGCCAAGCCCCAGGTCCAAGCCAGTGCATG		0	0	999	8:C>T	8	1	0.914439	0.36631	0.63369	0.085561	0.280749	0.156481	0.464254	0.310368	8.51282	6.94857	1	2	2	0	2	0	2	1	2	2	1	0	0	2	1	0	2	1	2	2	2	2	2	1	0	2	2	0	0	2
23114283|F|0-37:T>C-37:T>C	TGCAGCTACTGTCTTTGGTGAACTCCCGTGCCATGTATGCTTTGGCATGAGCGGTTCAGCAGGAATGCC	TGCAGCTACTGTCTTTGGTGAACTCCCGTGCCATGTATGCTTTGGCATG	KN288162.1_scaffold-14791	25667	1	1.35E-17	37:T>C	37	1	0.86631	0.459893	0.540107	0.13369	0.326203	0.231634	0.496783	0.364208	11.71078	8.87097	1	0	0	0	0	0	0	2	0	0	0	2	2	2	0	2	0	0	0	0	0	0	2	0	1	2	2	2	0	2
23114287|F|0-47:C>T-47:C>T	TGCAGCTAGAGGAAGGACCCGGCCATGGTAGGACCCAGCACGGCACACGGGAACTGCATGAGCGGTTCA	TGCAGCTAGAGGAAGGACCCGGCCATGGTAGGACCCAGCACGGCACACGGGAACTGCATG	KN279224.1_scaffold-2028	19825	1	1.47E-23	47:C>T	47	1	1	0.002674	0.997326	0	0.002674	0	0.005333	0.002667	11.3234	8	1	0	0	0	0	0	0	0	0	0	0	0	0	0	0	0	0	0	0	0	0	0	0	0	0	0	0	0	0	0
23114288|F|0-16:G>C-16:G>C	TGCAGCTAGAGGGAGTGGCCCCTGAAGACTTCACCAGGTCCCTGGTGCAGGTTATTTACAGGGCCTGGA	TGCAGCTAGAGGGAGTGGCCCCTGAAGACTTCACCAGGTCCCTGGTGCAGGTTATTTACAGGGCCTGGA	KN291647.1_scaffold-19895	225403	1	1.84E-28	16:G>C	16	0.97861	0.986339	0.144809	0.855191	0.013661	0.131148	0.026949	0.247678	0.137314	6.90088	4.01515	1	0	0	0	2	0	0	0	0	0	0	0	2	0	0	2	0	0	0	0	0	0	0	0	0	0	0	0	2	0
23114292|F|0-38:C>T-38:C>T	TGCAGCTAGGAGCCTGGCTGGCACTCAGAGTATGGCTCCGGTTTTGAGTGGTGCATGAGCGGTTCAGCA	TGCAGCTAGGAGCCTGGCTGGCACTCAGAGTATGGCTCCGGTTTTGAGTGGTGCATG	KN287034.1_scaffold-13180	180512	1	6.23E-22	38:C>T	38	1	1	0.029412	0.970588	0	0.029412	0	0.057093	0.028547	10.36034	3.72727	1	0	0	0	0	0	0	0	0	0	0	0	0	0	0	0	0	0	0	0	0	0	0	0	0	0	0	0	0	0
23114293|F|0-43:G>A-43:G>A	TGCAGCTAGGGAACAGAGGGGTGGGGCCAGCCCTGCTGGGCTGGAGCAGAGAACAGAGCCGTGCCCAGA	TGCAGCTAGGGAACAGAGGGGTGGGGCCAGCCCTGCTGGGCTGGAGCAGAGAACAGAGCCGTGCCCAGA	KN287197.1_scaffold-13400	712138	10	1.84E-28	43:G>A	43	1	1	0.042781	0.957219	0	0.042781	0	0.081901	0.040951	9.32409	3.15789	1	0	0	0	0	0	0	0	0	0	0	0	0	0	0	0	0	0	0	0	0	0	0	0	0	0	0	0	0	0
23114294|F|0-5:C>A-5:C>A	TGCAGCTAGGGAATGGGGAGCTCCCAGCTCCTCAGCTGCCACTTCCATGAGTGAACTTAAAGAAGCAGG	TGCAGCTAGGGAATGGGGAGCTCCCAGCTCCTCAGCTGCCACTTCCATGAGTGAACTTAAAGAAGCAGG	KN287534.1_scaffold-13893	164966	1	1.84E-28	5:C>A	5	0.994652	1	0.002688	0.997312	0	0.002688	0	0.005362	0.002681	9.35684	5	1	0	0	0	0	0	0	2	0	0	0	0	0	0	0	0	0	0	0	0	0	0	0	0	0	0	0	0	0	0
23114298|F|0-29:G>T-29:G>T	TGCAGCTAGGGATGTAAATATTGTTTGAAGTACTGTCTTCTAACCTCTTCCAGTTACAGTAGTTAAACA	TGCAGCTAGGGATGTAAATATTGTTTGAAGTACTGTCTTCTAACCTCTTCCAGTTACAGTAGTTAAACA	KN279604.1_scaffold-2584	204099	1	1.84E-28	29:G>T	29	0.989305	0.997297	0.013514	0.986486	0.002703	0.010811	0.005391	0.026662	0.016026	5.31236	4.33333	1	0	0	0	0	0	0	-	0	0	0	0	0	0	0	0	0	0	0	0	0	0	0	0	0	0	0	0	0	0
23114306|F|0-50:T>A-50:T>A	TGCAGCTAGTTGTCTCTGAGAAAACCAGACGTCCACACTCATTTGGACATTGGGTGTCTCCTGACAAGC	TGCAGCTAGTTGTCTCTGAGAAAACCAGACGTCCACACTCATTTGGACATTGGGTGTCTCCTGACAAGC	KN282510.1_scaffold-6652	13021	1	1.84E-28	50:T>A	50	0.994652	1	0.018817	0.981183	0	0.018817	0	0.036926	0.018463	8.3953	4.25	1	0	0	0	0	0	0	0	0	0	0	0	0	0	0	0	0	0	0	0	0	0	0	0	0	0	0	0	0	0
23114310|F|0-38:C>A-38:C>A	TGCAGCTATAGGAAGGGCCCAACCATGGAAGGACCCGGCGCAGCATGAGCGGTTCAGCAGGAATGCCGA	TGCAGCTATAGGAAGGGCCCAACCATGGAAGGACCCGGCGCAGCATG	KN287605.1_scaffold-14002	12600	1	1.60E-16	38:C>A	38	0.981283	0.997275	0.002725	0.997275	0.002725	0	0.005435	0.005435	0.005435	9.60841	3	1	0	0	0	0	0	0	0	0	0	0	0	0	0	0	0	0	0	0	0	0	0	0	0	0	0	0	0	0	0
23114313|F|0-38:C>T-38:C>T	TGCAGCTATCTCCTTGAAACTTGGCAGGATTTGTGGCCCCTCCAGGGGCTAGCATGAGCGGTTCAGCAG	TGCAGCTATCTCCTTGAAACTTGGCAGGATTTGTGGCCCCTCCAGGGGCTAGCATG	KN281065.1_scaffold-4606	130118	10	2.17E-21	38:C>T	38	0.967914	0.98895	0.030387	0.969613	0.01105	0.019337	0.021855	0.058927	0.040391	7.11697	3.18182	1	0	0	0	0	0	0	0	0	0	0	-	0	0	-	0	0	0	0	0	0	0	0	0	0	0	0	0	0	0
23110304|F|0-31:G>C-31:G>C	TGCAGCTATGTGCAGTCTTCTGATGATTTCTGCTGTGTTTTGTAGTAGCATTTTGTTGGTGTGCAGCAT	TGCAGCTATGTGCAGTCTTCTGATGATTTCTGCTGTGTTTTGTAGTAGCATTTTGTTGGTGTGCAGCAT	KN291167.1_scaffold-19203	343973	1	1.84E-28	31:G>C	31	0.997326	0.954424	0.126005	0.873995	0.045576	0.080429	0.086998	0.220256	0.153627	9.39509	7.76786	1	0	0	0	0	0	0	0	0	0	0	0	0	0	0	0	0	0	0	0	0	0	0	0	0	0	2	0	0	2
23114280|F|0-8:T>C-8:T>C	TGCAGCTATTTGACAAAGCATGAGCGGTTCAGCAGGAATGCCGAGACCGATCTCGTATGCCGTCTTCTG	TGCAGCTATTTGACAAAGCATGAGCGGTTCAGCAGGAATGCCGAGACCGATCTCGTATGCCGTCTTCTG		0	0	999	8:T>C	8	0.994652	0.994624	0.623656	0.376344	0.005376	0.61828	0.010695	0.469418	0.240057	7.70842	7.36897	1	2	0	2	0	0	2	2	0	0	0	2	2	2	0	2	2	2	0	0	2	0	2	2	0	0	2	0	2	2
23114329|F|0-11:G>A-11:G>A	TGCAGCTCACCGGGGTGGCCGAGCCAGATCACGGGCGCAGCCTGGCTCTGCAAGCCATCTTGCAGCGGT	TGCAGCTCACCGGGGTGGCCGAGCCAGATCACGGGCGCAGCCTGGCTCTGCAAGCCATCTTGCAGCGGT	KN285958.1_scaffold-11600	254193	1	1.84E-28	11:G>A	11	1	0.994652	0.034759	0.965241	0.005348	0.029412	0.010638	0.067102	0.03887	10.10515	5.4	1	0	0	0	0	0	0	0	0	0	0	0	0	0	0	0	0	0	0	0	0	0	0	0	0	0	0	0	0	0
23114334|F|0-45:A>G-45:A>G	TGCAGCTCACTCTGAAACCTGAGTGGGATGGCCAGGCACCATGAAAACAGCTGGGTAGTGTAAGCATGA	TGCAGCTCACTCTGAAACCTGAGTGGGATGGCCAGGCACCATGAAAACAGCTGGGTAGTGTAAGCATGA	KN282762.1_scaffold-7039	1027	2	3.08E-26	45:A>G	45	0.97861	0.953552	0.295082	0.704918	0.046448	0.248634	0.088581	0.416017	0.252299	10.18493	7.36364	1	1	2	0	2	2	0	0	0	0	0	0	0	0	0	0	0	0	0	1	1	2	0	0	2	2	0	0	2	2
23114341|F|0-5:C>T-5:C>T	TGCAGCTCAGATCTAGCCCAGAGGCTGATGTAGAGGGACCCGGGCTGAAAGATTACACTAGGATGGGAC	TGCAGCTCAGATCTAGCCCAGAGGCTGATGTAGAGGGACCCGGGCTGAAAGATTACACTAGGATGGGAC	KN293592.1_scaffold-22808	32692	1	1.84E-28	5:C>T	5	0.994652	0.994624	0.08871	0.91129	0.005376	0.083333	0.010695	0.161681	0.086188	6.32251	3.87179	1	0	2	0	0	0	0	0	0	0	0	2	0	0	0	0	0	0	0	0	0	0	0	0	2	2	0	0	0	0
23114353|F|0-24:A>T-24:A>T	TGCAGCTCATCCACGGTGTATGTGAGTGGGGGGAGGGGCTCCCGCTGATGCATGAGCGGTTCAGCAGGA	TGCAGCTCATCCACGGTGTATGTGAGTGGGGGGAGGGGCTCCCGCTGATGCATG	KN291823.1_scaffold-20150	96410	1	2.62E-20	24:A>T	24	1	0.973262	0.139037	0.860963	0.026738	0.112299	0.052046	0.239412	0.145729	13.72052	9.36508	1	0	2	0	0	0	0	0	0	0	0	0	0	0	0	0	0	0	0	0	0	0	0	0	0	0	0	0	0	0
23114354|F|0-23:C>A-23:C>A	TGCAGCTCATCCAGAGGATAGCTCACACAGCTGCATGAGCGGTTCAGCAGGAATGCCGAGACCGATCTC	TGCAGCTCATCCAGAGGATAGCTCACACAGCTGCATG	KN284375.1_scaffold-9346	301996	1	3.16E-11	23:C>A	23	0.983957	1	0.002717	0.997283	0	0.002717	0	0.00542	0.00271	9.3443	3	1	2	0	0	0	0	0	0	0	0	0	0	0	0	0	0	0	0	0	0	0	0	0	0	0	0	0	0	0	0
23114356|F|0-56:C>T-56:C>T	TGCAGCTCATGCAGCAGTGGCTTGATGGCAGGGCATGTGCCCCTGCACATAAGAAACGGGGTGCAGAGC	TGCAGCTCATGCAGCAGTGGCTTGATGGCAGGGCATGTGCCCCTGCACATAAGAAACGGGGTGCAGAGC	KN287192.1_scaffold-13392	1511	1	1.84E-28	56:C>T	56	1	0.885027	0.352941	0.647059	0.114973	0.237968	0.203509	0.456747	0.330128	9.51816	6.71166	1	0	0	0	0	0	2	0	0	0	0	0	0	0	0	0	0	0	2	0	0	0	0	0	0	0	0	0	0	0
23114358|F|0-38:C>A-38:C>A	TGCAGCTCATTTCCATGGAGACCCCAGCAGCAGCAGACCAGTTACAGCATGGGGCCAAGGTTTCCATGG	TGCAGCTCATTTCCATGGAGACCCCAGCAGCAGCAGACCAGTTACAGCATGGGGCCAAGGTTTCCATGG	KN283030.1_scaffold-7431	117576	3	1.84E-28	38:C>A	38	0.941176	0.997159	0.002841	0.997159	0.002841	0	0.005666	0.005666	0.005666	3.5711	3	1	0	-	0	1	0	0	0	0	0	0	0	0	0	0	-	0	0	0	0	0	0	0	0	0	0	0	0	0	0
23114361|F|0-20:G>A-20:G>A	TGCAGCTCCAATTGCACTTTGGCCTGACTTCATCCCTGCATGAGCGGTTCAGCAGGAATGCCGAGACCG	TGCAGCTCCAATTGCACTTTGGCCTGACTTCATCCCTGCATG	KN278693.1_scaffold-1285	32265	2	7.45E-14	20:G>A	20	0.962567	1	0.002778	0.997222	0	0.002778	0	0.00554	0.00277	8.27778	3	1	0	2	0	0	0	0	0	0	0	0	0	0	0	0	0	0	0	0	0	0	0	0	0	0	0	0	0	0	0
23114377|F|0-16:C>A-16:C>A	TGCAGCTCCAGTTGTACTTTGGCCTTTCCTGACTTCATCTCTGCATGAGCGGTTCAGCAGGAATGCCGA	TGCAGCTCCAGTTGTACTTTGGCCTTTCCTGACTTCATCTCTGCATG	JRXG01009743.1_scaffold-1827_1	10133	1	1.60E-16	16:C>A	16	0.962567	1	0.002778	0.997222	0	0.002778	0	0.00554	0.00277	8.15471	3	1	0	0	0	0	0	0	0	0	0	0	0	0	0	0	0	0	0	0	0	0	0	0	0	0	0	0	0	0	0
23114378|F|0-53:C>T-53:C>T	TGCAGCTCCATACCTCTCCTACATTGCAGCCCATGCCCCACAAATGGCTTTCCCCAGCCAGGACTGTGC	TGCAGCTCCATACCTCTCCTACATTGCAGCCCATGCCCCACAAATGGCTTTCCCCAGCCAGGACTGTGC	KN286100.1_scaffold-11810	46243	1	1.84E-28	53:C>T	53	1	1	0.032086	0.967914	0	0.032086	0	0.062112	0.031056	10.00853	4.28571	1	0	0	0	0	0	0	0	0	0	0	0	0	0	0	0	0	0	0	0	0	0	0	0	0	0	0	0	0	0
23114382|F|0-12:A>G-12:A>G	TGCAGCTCCCAGACACACCAGAGTTGGACAGCCCTGGATTAGGATATGAGCATGAGCGGTTCAGCAGGA	TGCAGCTCCCAGACACACCAGAGTTGGACAGCCCTGGATTAGGATATGAGCATG	KN279557.1_scaffold-2513	632217	1	1.22E-18	12:A>G	12	0.989305	0.87027	0.521622	0.478378	0.12973	0.391892	0.2258	0.499065	0.362432	10.11166	8.73361	1	2	1	0	1	2	0	1	2	0	2	2	0	0	2	0	2	2	0	0	0	2	0	2	1	2	2	0	0	0
23114389|F|0-6:T>G-6:T>G	TGCAGCTCCCCAGACCTTTACAACTCTACATTAGAAGTTCAACCTTGCATGAGCGGTTCAGCAGGAATG	TGCAGCTCCCCAGACCTTTACAACTCTACATTAGAAGTTCAACCTTGCATG	KN290403.1_scaffold-18060	74968	1	1.09E-18	6:T>G	6	0.962567	0.997222	0.005556	0.994444	0.002778	0.002778	0.00554	0.011049	0.008295	6.94104	5.5	1	0	0	0	0	-	0	0	0	0	0	0	0	0	0	0	0	0	0	0	0	0	0	0	0	0	0	0	0	0
23114394|F|0-14:A>T-14:A>T	TGCAGCTCCCCCATAGCTCTGGCTCCAGTTCCAGGCTCTGTGCCAGCATGAGCGGTTCAGCAGGAATGC	TGCAGCTCCCCCATAGCTCTGGCTCCAGTTCCAGGCTCTGTGCCAGCATG	KN285115.1_scaffold-10389	83138	8	3.91E-18	14:A>T	14	0.951872	1	0.036517	0.963483	0	0.036517	0	0.070367	0.035183	7.13122	4.46667	1	0	0	0	0	0	0	0	0	0	0	0	0	0	0	0	0	0	0	0	0	0	0	0	0	0	0	0	0	0
23114396|F|0-36:A>C-36:A>C	TGCAGCTCCCCTACCAAGTCATTCCCCATAGCCAACACCAAGTCCAGTAAGGCATTCCCTGTAGTAGGA	TGCAGCTCCCCTACCAAGTCATTCCCCATAGCCAACACCAAGTCCAGTAAGGCATTCCCTGTAGTAGGA	KN291251.1_scaffold-19329	164196	10	1.84E-28	36:A>C	36	0.994652	0.997312	0.043011	0.956989	0.002688	0.040323	0.005362	0.082322	0.043842	6.71983	3.75	1	0	0	0	0	0	0	0	0	0	0	0	0	0	0	0	0	0	0	0	0	0	0	0	0	0	0	0	0	0
23114398|F|0-32:C>T-32:C>T	TGCAGCTCCCCTACCAGGTCATTCCCCATAGCCAACATCAAATCCAGTAAGGATTTCCCCTAGTGGGAC	TGCAGCTCCCCTACCAGGTCATTCCCCATAGCCAACATCAAATCCAGTAAGGATTTCCCCTAGTGGGAC	KN285831.1_scaffold-11417	26615	3	1.84E-28	32:C>T	32	0.858289	0.996885	0.003115	0.996885	0.003115	0	0.006211	0.006211	0.006211	4.50633	3	1	-	0	-	0	0	0	-	0	0	0	0	0	-	-	0	-	0	0	0	0	0	0	-	0	-	0	0	0	0
23114413|F|0-5:C>T-5:C>T	TGCAGCTCCTACCTGCCACCACCAACCTCTAGTAGGGCAAATAATACTCTGGCATGAGCGGTTCAGCAG	TGCAGCTCCTACCTGCCACCACCAACCTCTAGTAGGGCAAATAATACTCTGGCATG	KN293400.1_scaffold-22507	227930	1	2.17E-21	5:C>T	5	0.983957	0.972826	0.081522	0.918478	0.027174	0.054348	0.052871	0.149752	0.101311	7.94407	7.68571	1	0	0	0	0	0	0	0	0	0	0	0	0	0	0	0	0	0	0	0	0	0	0	0	0	0	0	0	0	0
23114426|F|0-8:C>A-8:C>A	TGCAGCTCCTTCTCAGTTTCTTCTAAGACAAGTATCTTTGGGGAGGAGCTCATCTGCTCAGTATCAGCA	TGCAGCTCCTTCTCAGTTTCTTCTAAGACAAGTATCTTTGGGGAGGAGCTCATCTGCTCAGTATCAGCA	KN284444.1_scaffold-9437	52453	1	1.84E-28	8:C>A	8	0.975936	1	0.00274	0.99726	0	0.00274	0	0.005464	0.002732	5.92998	3	1	0	0	0	0	0	0	0	-	0	0	0	0	0	0	0	0	0	0	0	0	0	0	-	0	0	0	0	0	0
23114427|F|0-9:T>C-9:T>C	TGCAGCTCCTTCTGGTGCTGCACCGAGCTCCTGCTTCTGTGTAAGCAGGCATGAGCGGTTCAGCAGGAA	TGCAGCTCCTTCTGGTGCTGCACCGAGCTCCTGCTTCTGTGTAAGCAGGCATG	KN280676.1_scaffold-4071	256249	2	9.08E-20	9:T>C	9	1	0.991979	0.090909	0.909091	0.008021	0.082888	0.015914	0.165289	0.090602	11.57204	6.275	1	0	0	0	0	0	0	0	0	0	2	0	0	0	0	0	0	0	0	0	0	0	0	0	0	0	0	0	0	0
23114429|F|0-26:C>T-26:C>T	TGCAGCTCCTTGTCACAGCACCTGCCCAGTCGTGCCCTGCATGAGCGGTTCAGCAGGAATGCCGAGACC	TGCAGCTCCTTGTCACAGCACCTGCCCAGTCGTGCCCTGCATG	KN281542.1_scaffold-5311	2937	1	2.19E-14	26:C>T	26	0.986631	0.937669	0.257453	0.742547	0.062331	0.195122	0.116891	0.382341	0.249616	8.94688	6	1	0	0	0	0	0	0	2	0	2	0	2	0	0	0	-	0	0	0	0	2	0	0	2	0	0	0	-	0	0
23114430|F|0-67:T>C-67:T>C	TGCAGCTCCTTTAATCTCGTAGGTTCCCCCACGCACACCCCACGCTCGCTGATTGGCGAAGGGGCCCTA	TGCAGCTCCTTTAATCTCGTAGGTTCCCCCACGCACACCCCACGCTCGCTGATTGGCGAAGGGGCCCTA	KN282958.1_scaffold-7317	548466	1	1.84E-28	67:T>C	67	0.997326	0.997319	0.02681	0.97319	0.002681	0.024129	0.005348	0.052182	0.028765	8.9188	5.66667	1	0	0	0	0	0	0	0	0	0	0	0	0	0	0	0	0	0	0	0	0	0	0	0	0	0	0	0	0	0
23114435|F|0-21:T>G-21:T>G	TGCAGCTCGGAGGTGGGAGACTGGGCGAGATGGGCTGGCCGTAGGTCTGACCCAGTCCGGCTCCTGCAT	TGCAGCTCGGAGGTGGGAGACTGGGCGAGATGGGCTGGCCGTAGGTCTGACCCAGTCCGGCTCCTGCAT	KN290698.1_scaffold-18498	187927	1	1.84E-28	21:T>G	21	1	0.893048	0.481283	0.518717	0.106952	0.374332	0.191026	0.499299	0.345163	9.56132	6.69027	1	2	1	2	2	0	2	0	0	0	0	0	0	0	0	2	2	0	0	1	1	2	2	2	1	2	0	2	1	2
23114436|F|0-19:C>A-19:C>A	TGCAGCTCGGCCTAGCCCCCCACCGGGAAGAGCATGACACCTCTCTGGCCCCAGCTTGCACCCAGCAGC	TGCAGCTCGGCCTAGCCCCCCACCGGGAAGAGCATGACACCTCTCTGGCCCCAGCTTGCACCCAGCAGC	KN286555.1_scaffold-12483	412283	1	1.84E-28	19:C>A	19	1	0.994652	0.069519	0.930481	0.005348	0.064171	0.010638	0.129372	0.070005	6.68035	4.32353	1	0	0	0	0	0	0	0	0	0	0	0	0	0	0	0	0	0	0	0	0	0	0	0	0	0	0	0	0	0
23114440|F|0-36:C>T-36:C>T	TGCAGCTCGTCTGAGAGGTGTGGGGAGAGGGGCTGGCTCCTGTTGCTGCATGAGCGGTTCAGCAGGAAT	TGCAGCTCGTCTGAGAGGTGTGGGGAGAGGGGCTGGCTCCTGTTGCTGCATG	KN286416.1_scaffold-12295	127145	1	3.14E-19	36:C>T	36	0.986631	1	0.01897	0.98103	0	0.01897	0	0.037221	0.01861	8.62445	5.5	1	0	0	0	0	0	0	0	0	0	0	0	0	2	0	0	0	0	0	0	0	2	0	0	0	0	0	0	0	0
23114444|F|0-9:A>G-9:A>G	TGCAGCTCTACCCCCAGGACTCCAGGTCAAGCCCCTATGCCACCTGGGGCAACTTGCTGCATGAGCGGT	TGCAGCTCTACCCCCAGGACTCCAGGTCAAGCCCCTATGCCACCTGGGGCAACTTGCTGCATG	KN285292.1_scaffold-10652	34368	1	3.43E-25	9:A>G	9	0.997326	1	0.018767	0.981233	0	0.018767	0	0.036829	0.018415	10.84222	3.85714	1	0	0	0	0	0	0	0	0	0	0	0	0	0	0	0	0	0	0	0	0	0	0	0	0	0	0	0	0	0
23114445|F|0-7:C>G-7:C>G	TGCAGCTCTACGCCACGGCAGGGTTGGGACCACCCCTTTCATGCTCTGATAGAGCTAAGGAGCATGAGC	TGCAGCTCTACGCCACGGCAGGGTTGGGACCACCCCTTTCATGCTCTGATAGAGCTAAGGAGCATGAGC	KN289487.1_scaffold-16706	22582	1	8.58E-27	7:C>G	7	1	1	0.024064	0.975936	0	0.024064	0	0.04697	0.023485	12.5766	4.88889	1	0	0	0	0	0	2	0	0	0	0	0	0	0	0	0	0	0	0	0	0	0	0	0	0	0	0	0	0	0
23114456|F|0-67:A>G-67:A>G	TGCAGCTCTCCTGGCCTCTCCAAAGGAGCCGCTGTCATGCAGCAGCCACCTTTCCACTCCCTTCTCCAA	TGCAGCTCTCCTGGCCTCTCCAAAGGAGCCGCTGTCATGCAGCAGCCACCTTTCCACTCCCTTCTCCAA	KN290320.1_scaffold-17937	69282	1	1.84E-28	67:A>G	67	0.997326	0.994638	0.064343	0.935657	0.005362	0.058981	0.010666	0.120406	0.065536	7.53105	4.23333	1	0	0	0	0	0	2	0	0	0	0	0	0	0	0	0	0	0	0	0	0	0	0	0	0	0	2	0	0	0
23114457|F|0-17:G>A-17:G>A	TGCAGCTCTCCTTCCCCGGGCAAAGCACCTGGCTGCTCCTGCCTGGCACACGCTGCTTCGTTAGGACGG	TGCAGCTCTCCTTCCCCGGGCAAAGCACCTGGCTGCTCCTGCCTGGCACACGCTGCTTCGTTAGGACGG	KN279422.1_scaffold-2304	32155	1	1.84E-28	17:G>A	17	0.991979	0.997305	0.008086	0.991914	0.002695	0.005391	0.005376	0.016042	0.010709	5.41991	4	1	0	0	0	0	0	0	0	0	0	0	0	0	0	0	0	0	0	0	0	0	0	0	0	0	0	0	0	0	0
23114465|F|0-51:C>T-51:C>T	TGCAGCTCTGCTCCCTGCTCTGATCTGTTACAAGCCACACACACAGGCTACCCATGCCACTTGTGGCAA	TGCAGCTCTGCTCCCTGCTCTGATCTGTTACAAGCCACACACACAGGCTACCCATGCCACTTGTGGCAA	KN280871.1_scaffold-4344	156319	2	1.84E-28	51:C>T	51	0.997326	0.873995	0.329759	0.670241	0.126005	0.203753	0.220256	0.442036	0.331146	10.26341	6.08667	1	0	0	0	0	0	0	0	0	0	0	0	2	0	0	0	0	0	0	0	0	0	0	0	0	0	0	0	2	0
23114472|F|0-34:G>A-34:G>A	TGCAGCTCTGGGTAGGCCTGGCAGTAAGGGCAGCGTCACCGCAGGGGAGAGGCATGAGCGGTTCAGCAG	TGCAGCTCTGGGTAGGCCTGGCAGTAAGGGCAGCGTCACCGCAGGGGAGAGGCATG	KN292285.1_scaffold-20839	19667	1	2.17E-21	34:G>A	34	1	1	0.002674	0.997326	0	0.002674	0	0.005333	0.002667	13.62128	8	1	0	0	0	0	0	0	0	0	0	0	0	0	0	0	0	0	0	0	0	0	0	0	0	0	0	0	0	0	0
23114476|F|0-62:C>T-62:C>T	TGCAGCTCTGTTGCTGGCCCCCTCCTCTAGCTGCCATATGCCACATACAGAAGCTGCCCATGCCACTTG	TGCAGCTCTGTTGCTGGCCCCCTCCTCTAGCTGCCATATGCCACATACAGAAGCTGCCCATGCCACTTG	KN283996.1_scaffold-8792	63411	1	8.58E-27	62:C>T	62	0.989305	0.991892	0.156757	0.843243	0.008108	0.148649	0.016085	0.264368	0.140226	9.12473	5.18182	1	0	0	2	0	2	0	0	0	0	0	0	0	0	0	0	0	1	2	0	0	0	0	0	0	0	0	0	0	0
23114477|F|0-35:A>G-35:A>G	TGCAGCTCTGTTTTTTTTGCCAAAATAGGGGTGCTAGCTCCAGTGTCCTGGTCACATATCACCTTGGAT	TGCAGCTCTGTTTTTTTTGCCAAAATAGGGGTGCTAGCTCCAGTGTCCTGGTCACATATCACCTTGGAT	KN286683.1_scaffold-12673	196129	1	1.84E-28	35:A>G	35	0.967914	1	0.005525	0.994475	0	0.005525	0	0.010989	0.005494	4.32159	3.5	1	0	0	-	0	0	0	0	0	0	0	0	0	0	0	0	0	0	0	0	0	-	0	0	0	0	0	0	0	0
23114478|F|0-20:C>T-20:C>T	TGCAGCTCTTCACAGTTTGGCTCCAATGTGCCTTCTGAACACAGGCATGAGCGGTTCAGCAGGAATGCC	TGCAGCTCTTCACAGTTTGGCTCCAATGTGCCTTCTGAACACAGGCATG	KN280170.1_scaffold-3388	498259	1	1.35E-17	20:C>T	20	0.997326	1	0.010724	0.989276	0	0.010724	0	0.021218	0.010609	13.03419	8.6	1	0	0	0	0	0	0	0	2	0	0	0	0	0	0	0	0	0	0	0	0	0	0	0	0	0	0	0	0	0
23114489|F|0-48:T>C-48:T>C	TGCAGCTCTTGCCTCTTCTAAACAGCAGGAGGCCATCTCAACCCCCTGTCCTGCACCTTGGCAGCCCGT	TGCAGCTCTTGCCTCTTCTAAACAGCAGGAGGCCATCTCAACCCCCTGTCCTGCACCTTGGCAGCCCGT	KN283584.1_scaffold-8216	25096	1	1.84E-28	48:T>C	48	0.997326	1	0.002681	0.997319	0	0.002681	0	0.005348	0.002674	8.97655	4	1	0	0	0	0	0	0	0	0	0	0	0	0	0	0	0	0	0	0	0	0	0	0	0	0	0	0	0	0	0
23114495|F|0-25:G>A-25:G>A	TGCAGCTCTTTTGGTTCAGCTCAAAGCAGTCTCTGGCAAACACCTCCTTTCTTGTCCAGTGCTGACCAT	TGCAGCTCTTTTGGTTCAGCTCAAAGCAGTCTCTGGCAAACACCTCCTTTCTTGTCCAGTGCTGACCAT	KN289044.1_scaffold-16058	401952	1	1.84E-28	25:G>A	25	0.986631	0.99729	0.03523	0.96477	0.00271	0.03252	0.005405	0.067978	0.036692	8.30238	4.9375	1	0	0	0	0	0	0	0	0	2	0	0	0	0	2	0	0	0	0	0	0	0	0	0	0	0	0	0	0	0
23114500|F|0-19:T>C-19:T>C	TGCAGCTGAAGACCATCCATAAAAGCAAGCCGTGCTCCCTGGCCTGTTGCATTTCTGGCTAGGAGCATG	TGCAGCTGAAGACCATCCATAAAAGCAAGCCGTGCTCCCTGGCCTGTTGCATTTCTGGCTAGGAGCATG	KN282936.1_scaffold-7279	24370	1	1.84E-28	19:T>C	19	1	0.930481	0.280749	0.719251	0.069519	0.21123	0.129372	0.403858	0.266615	10.31891	7.02308	1	0	0	0	0	0	0	0	0	0	0	0	0	0	0	0	0	0	0	0	0	0	2	0	0	0	0	0	0	2
23114503|F|0-28:T>C-28:T>C	TGCAGCTGAATTGGCTGAATCTCCAAATTGGCTCCATCCTCTGCATGAGCGGTTCAGCAGGAATGCCGA	TGCAGCTGAATTGGCTGAATCTCCAAATTGGCTCCATCCTCTGCATG	KN285158.1_scaffold-10451	26609	2	1.60E-16	28:T>C	28	1	0.991979	0.045455	0.954545	0.008021	0.037433	0.015914	0.086777	0.051345	10.08369	5.83333	1	0	0	0	0	0	0	0	0	0	2	0	0	2	0	0	0	0	0	0	0	0	0	0	0	0	1	0	0	0
23114504|F|0-52:A>T-52:A>T	TGCAGCTGACAAGCATTTTCAAAAGGCAACCCTGCTCACTACTCTCTGGCCAACCACTCCCTTGGCTAG	TGCAGCTGACAAGCATTTTCAAAAGGCAACCCTGCTCACTACTCTCTGGCCAACCACTCCCTTGGCTAG	KN288984.1_scaffold-15969	63454	1	1.84E-28	52:A>T	52	1	1	0.037433	0.962567	0	0.037433	0	0.072064	0.036032	10.02128	5.05882	1	0	0	0	0	0	0	0	0	0	0	0	0	0	0	0	0	0	0	0	0	0	0	0	0	0	0	0	0	0
23114505|F|0-38:A>G-38:A>G	TGCAGCTGACAAGGCTCACAGTGGTGGCAGCAGGGAGAATACTGCCAATGCTCTGAGCCTGGTAAGCTG	TGCAGCTGACAAGGCTCACAGTGGTGGCAGCAGGGAGAATACTGCCAATGCTCTGAGCCTGGTAAGCTG	KN289102.1_scaffold-16134	22542	1	1.84E-28	38:A>G	38	0.997326	1	0.010724	0.989276	0	0.010724	0	0.021218	0.010609	6.4514	2.5	1	0	0	0	0	0	0	0	0	0	0	0	0	0	0	0	0	0	0	0	0	0	0	0	0	0	0	0	0	2
23114516|F|0-30:C>T-30:C>T	TGCAGCTGACCCCCCCAACCTGTAGCCTTCCTCCCAGCACCACTGCCCCCTGGCCCCAGTGTAGCATGA	TGCAGCTGACCCCCCCAACCTGTAGCCTTCCTCCCAGCACCACTGCCCCCTGGCCCCAGTGTAGCATGA	KN293128.1_scaffold-22088	16451	1	6.63E-28	30:C>T	30	0.989305	1	0.002703	0.997297	0	0.002703	0	0.005391	0.002695	6.878	3	1	0	0	0	0	0	0	0	0	0	0	0	0	0	0	0	0	0	0	0	0	0	0	0	0	0	0	0	0	0
23114536|F|0-42:C>T-42:C>T	TGCAGCTGATCACTGAGCCAGGGGTGCATTGGGGGCATCCCCCGCATGAGCGGTTCAGCAGGAATGCCG	TGCAGCTGATCACTGAGCCAGGGGTGCATTGGGGGCATCCCCCGCATG	KN284432.1_scaffold-9421	19920	1	4.65E-17	42:C>T	42	0.917112	1	0.002915	0.997085	0	0.002915	0	0.005814	0.002907	6.125	5	1	0	0	0	0	0	-	0	0	0	0	0	0	0	0	0	0	0	0	0	0	0	0	0	0	0	0	-	0	0
23114551|F|0-30:C>T-30:C>T	TGCAGCTGCAACAGGAAGCCTGGCTGGCAGCGAGAGCACGGCTCCAGTTTTGGGCAGTGCATGAGCGGT	TGCAGCTGCAACAGGAAGCCTGGCTGGCAGCGAGAGCACGGCTCCAGTTTTGGGCAGTGCATG	KN278370.1_scaffold-815	107923	1	3.43E-25	30:C>T	30	1	1	0.061497	0.938503	0	0.061497	0	0.115431	0.057715	9.84255	6.5	1	0	0	0	0	0	0	0	0	0	0	0	0	0	0	0	0	0	0	0	0	0	0	0	0	0	0	0	0	0
23114552|F|0-20:C>T-20:C>T	TGCAGCTGCAACCCATCCACCCCATGAAGATCTGGGGGTACACAGCCCCCTGTGCCCTCCCAGGGTGCA	TGCAGCTGCAACCCATCCACCCCATGAAGATCTGGGGGTACACAGCCCCCTGTGCCCTCCCAGGGTGCA	KN278183.1_scaffold-555	249712	1	1.84E-28	20:C>T	20	1	1	0.045455	0.954545	0	0.045455	0	0.086777	0.043388	11.87234	3.41176	1	0	0	0	0	0	0	0	0	0	0	0	0	0	0	0	0	0	0	0	0	0	0	0	0	0	2	0	0	0
23114558|F|0-14:C>T-14:C>T	TGCAGCTGCACCAACGATGAGTAAAGTGAGAGAATCACTTCTTTGGATTTACTGGAAATGCATCAATTG	TGCAGCTGCACCAACGATGAGTAAAGTGAGAGAATCACTTCTTTGGATTTACTGGAAATGCATCAATTG	KN281823.1_scaffold-5709	186566	8	8.58E-27	14:C>T	14	1	0.836898	0.609626	0.390374	0.163102	0.446524	0.272999	0.475964	0.374482	6.79747	5.57447	1	2	2	1	2	1	1	2	2	2	0	2	0	0	0	0	0	0	2	0	2	0	1	2	2	2	0	2	0	0
23114559|F|0-60:C>G-60:C>G	TGCAGCTGCACCAATGTTGAGTAAAGCAGGAGAATCACTTCTCTGGATTTACAGGAGATACATCAATTG	TGCAGCTGCACCAATGTTGAGTAAAGCAGGAGAATCACTTCTCTGGATTTACAGGAGATACATCAATTG	KN288269.1_scaffold-14947	48834	10	1.84E-28	60:C>G	60	0.997326	1	0.005362	0.994638	0	0.005362	0	0.010666	0.005333	10.07066	6	1	0	0	0	0	0	0	0	0	0	0	0	0	0	0	0	0	0	0	0	0	0	0	0	0	0	0	0	0	0
23116586|F|0-5:G>C-5:G>C	TGCAGGTGCACTGGGAGCAGACACGCCAGGAAGCCATGCATGAGCGGTTCAGCAGGAATGCCGAGACCG	TGCAGGTGCACTGGGAGCAGACACGCCAGGAAGCCATGCATG	KN283452.1_scaffold-8011	90859	1	7.45E-14	5:G>C	5	1	0.986631	0.203209	0.796791	0.013369	0.18984	0.026381	0.32383	0.175105	12.37716	6.90099	1	0	0	0	0	0	2	0	0	2	0	2	0	0	0	0	0	0	0	2	0	0	0	0	2	0	0	0	0	0
23114567|F|0-60:A>G-60:A>G	TGCAGCTGCACTGTACTGAGGCTGCCTGAATGCACCTGTCCTGGGGTGGGCACAGTGGGAACCAGGTCA	TGCAGCTGCACTGTACTGAGGCTGCCTGAATGCACCTGTCCTGGGGTGGGCACAGTGGGAACCAGGTCA	KN277953.1_scaffold-234	18745	1	1.84E-28	60:A>G	60	1	0.975936	0.245989	0.754011	0.024064	0.221925	0.04697	0.370957	0.208964	9.62745	5.5514	1	0	2	2	0	0	0	0	2	0	0	0	2	0	2	2	2	0	0	0	0	2	2	0	0	0	0	0	0	2
23114568|F|0-57:G>A-57:G>A	TGCAGCTGCATCACTTCTGCATGGCTGGCAGCTGGAGCAGGGCTTCTGCTGGCCAGGGTTATTTTGGGT	TGCAGCTGCATCACTTCTGCATGGCTGGCAGCTGGAGCAGGGCTTCTGCTGGCCAGGGTTATTTTGGGT	KN285333.1_scaffold-10715	9452	1	1.84E-28	57:G>A	57	1	1	0.042781	0.957219	0	0.042781	0	0.081901	0.040951	8.52564	4.4	1	0	0	2	0	0	0	0	0	0	0	0	0	2	0	0	0	0	0	0	0	0	0	0	0	0	0	0	0	0
23114572|F|0-23:T>G-23:T>G	TGCAGCTGCCACTGGGGGGCCACTGCCATGCTTAAGGGGTGCACGTACACCTGCATGAGCGGTTCAGCA	TGCAGCTGCCACTGGGGGGCCACTGCCATGCTTAAGGGGTGCACGTACACCTGCATG	KN283158.1_scaffold-7609	494955	1	6.23E-22	23:T>G	23	1	1	0.002674	0.997326	0	0.002674	0	0.005333	0.002667	9.05769	3	1	0	0	0	0	0	0	0	0	0	0	0	0	0	0	0	0	0	0	0	0	0	0	0	0	0	0	0	0	0
23114577|F|0-24:C>T-24:C>T	TGCAGCTGCCAGCAACTGCCAGACCTCTTGAAAAGACAGCCCTGTTCTCTGCTCTCTGCTCCCTGCTCC	TGCAGCTGCCAGCAACTGCCAGACCTCTTGAAAAGACAGCCCTGTTCTCTGCTCTCTGCTCCCTGCTCC	KN291491.1_scaffold-19660	16770	1	1.84E-28	24:C>T	24	1	1	0.002674	0.997326	0	0.002674	0	0.005333	0.002667	7.01706	3	1	0	0	0	0	0	0	0	0	0	0	0	0	0	0	0	0	0	0	0	0	0	0	0	0	0	0	0	0	0
23114588|F|0-43:C>G-43:C>G	TGCAGCTGCCCCCATGTTGTTCCACATGAGACCAAGCCCAGCCCAAGGCAGCCTGTGTCTGCTGGCCTG	TGCAGCTGCCCCCATGTTGTTCCACATGAGACCAAGCCCAGCCCAAGGCAGCCTGTGTCTGCTGGCCTG	KN280948.1_scaffold-4448	33263	1	1.84E-28	43:C>G	43	0.997326	1	0.005362	0.994638	0	0.005362	0	0.010666	0.005333	7.38806	4	1	0	0	0	0	0	0	0	0	0	0	0	0	0	0	0	0	0	0	0	0	0	0	0	0	0	0	0	0	0
23114590|F|0-43:G>A-43:G>A	TGCAGCTGCCCCGGCCACGTGCCGGGGGCGAGGGGCAGAGCTAGAGAACAAGCTGCATGAGCGGTTCAG	TGCAGCTGCCCCGGCCACGTGCCGGGGGCGAGGGGCAGAGCTAGAGAACAAGCTGCATG	KN291900.1_scaffold-20263	19021	1	5.12E-23	43:G>A	43	1	1	0.016043	0.983957	0	0.016043	0	0.031571	0.015785	11.71368	5	1	0	0	0	0	0	0	0	0	0	0	0	0	0	0	0	0	0	0	0	0	2	0	0	0	0	0	0	0	0
23114600|F|0-49:C>T-49:C>T	TGCAGCTGCCTCCATGCTGCCCCATGACTACCCACTTTGCTGCCCAGGGCGCTGACTTATAACGTCAAC	TGCAGCTGCCTCCATGCTGCCCCATGACTACCCACTTTGCTGCCCAGGGCGCTGACTTATAACGTCAAC	KN285027.1_scaffold-10264	223565	1	1.84E-28	49:C>T	49	0.994652	0.978495	0.172043	0.827957	0.021505	0.150538	0.042086	0.284888	0.163487	6.89404	4.34146	1	0	0	0	0	0	0	0	0	0	0	0	0	0	0	0	0	0	0	0	0	0	0	0	0	2	0	0	0	0
23114603|F|0-60:C>T-60:C>T	TGCAGCTGCCTGCCCGGAGGCACCGGCTGAGTCACCGAGCTGGGAACCGGCGTTCGGAGGCTGAGAGCC	TGCAGCTGCCTGCCCGGAGGCACCGGCTGAGTCACCGAGCTGGGAACCGGCGTTCGGAGGCTGAGAGCC	KN279927.1_scaffold-3041	24906	1	1.84E-28	60:C>T	60	0.933155	0.997135	0.005731	0.994269	0.002865	0.002865	0.005714	0.011396	0.008555	4.47506	3	1	0	0	0	0	0	0	0	0	0	0	0	0	0	0	0	0	0	0	0	0	0	0	0	0	0	0	-	-	0
23114606|F|0-57:C>T-57:C>T	TGCAGCTGCCTGGGTACTGCTTGGCTTGCCCCACCTCCCACAGCTTCTCCTCCTGCTCCTGTTTCTGCT	TGCAGCTGCCTGGGTACTGCTTGGCTTGCCCCACCTCCCACAGCTTCTCCTCCTGCTCCTGTTTCTGCT	KN289776.1_scaffold-17139	199762	1	1.84E-28	57:C>T	57	0.986631	0.99729	0.01355	0.98645	0.00271	0.01084	0.005405	0.026733	0.016069	4.73465	3.2	1	0	0	0	0	0	0	0	0	0	0	0	0	0	0	0	0	0	0	0	0	0	0	0	0	0	0	0	0	0
23114619|F|0-63:C>T-63:C>T	TGCAGCTGCGTCTGCCTGGCGAGAGCAAAAGCAGCCTCTCACAGGCTTTTCCCCCACTTGGCACTCAAA	TGCAGCTGCGTCTGCCTGGCGAGAGCAAAAGCAGCCTCTCACAGGCTTTTCCCCCACTTGGCACTCAAA	KN284388.1_scaffold-9359	60235	1	1.84E-28	63:C>T	63	0.994652	1	0.002688	0.997312	0	0.002688	0	0.005362	0.002681	5.12688	4	1	0	0	0	0	0	0	0	0	0	0	0	0	0	0	0	0	0	0	0	0	0	0	0	0	0	0	0	0	0
23114629|F|0-54:C>T-54:C>T	TGCAGCTGCTCCTCTGGGGACTGCCGCCACTGCCTTTCCCTACCCCTTGGCATCCCCTGTGTTGCTGCC	TGCAGCTGCTCCTCTGGGGACTGCCGCCACTGCCTTTCCCTACCCCTTGGCATCCCCTGTGTTGCTGCC	KN291332.1_scaffold-19443	300997	1	1.84E-28	54:C>T	54	0.994652	1	0.010753	0.989247	0	0.010753	0	0.021274	0.010637	5.60086	4.5	1	0	0	0	0	0	0	0	0	0	0	0	0	0	0	0	0	0	0	0	0	0	0	0	0	0	0	0	0	0
23114634|F|0-22:G>A-22:G>A	TGCAGCTGCTCGCAGCCCACCTGGGGTTGCCTGTGCCTGCTCCAGACAGCTCTGCGCATGAGCGGTTCA	TGCAGCTGCTCGCAGCCCACCTGGGGTTGCCTGTGCCTGCTCCAGACAGCTCTGCGCATG	KN280938.1_scaffold-4433	33197	5	1.47E-23	22:G>A	22	1	1	0.002674	0.997326	0	0.002674	0	0.005333	0.002667	13.32553	3	1	0	0	0	0	0	0	0	0	0	0	0	0	0	2	0	0	0	0	0	0	0	0	0	0	0	0	0	0	0
23114637|F|0-12:C>A-12:C>A	TGCAGCTGCTGACAGCCCATGTGGGACTGCCTGTGCCTGTTCAGGACAGCCCCATGCATGAGCGGTTCA	TGCAGCTGCTGACAGCCCATGTGGGACTGCCTGTGCCTGTTCAGGACAGCCCCATGCATG	KN290462.1_scaffold-18146	152307	9	1.47E-23	12:C>A	12	1	1	0.002674	0.997326	0	0.002674	0	0.005333	0.002667	12.41702	8	1	0	0	0	0	0	0	0	0	0	0	0	0	0	0	0	0	0	0	0	0	0	0	0	0	0	0	0	2	0
23114641|F|0-47:G>T-47:G>T	TGCAGCTGCTGCTTCTGCAACATTGTCTGCCCATCTTGCTGGTGGGGGAGGGATTGGCATGAGCGGTTC	TGCAGCTGCTGCTTCTGCAACATTGTCTGCCCATCTTGCTGGTGGGGGAGGGATTGGCATG	KN291357.1_scaffold-19479	211152	1	4.20E-24	47:G>T	47	1	0.994652	0.018717	0.981283	0.005348	0.013369	0.010638	0.036733	0.023685	9.86266	7.27273	1	0	0	0	0	0	0	0	0	0	0	0	0	0	0	0	0	0	0	0	0	0	2	0	0	0	0	0	0	2
23114642|F|0-21:A>T-21:A>T	TGCAGCTGCTGCTTTACCAGCAGCGGTGGCAGCCACCTCAGGGATCCCCCCTGGTCCCAGCCTGGAAGA	TGCAGCTGCTGCTTTACCAGCAGCGGTGGCAGCCACCTCAGGGATCCCCCCTGGTCCCAGCCTGGAAGA	KN283619.1_scaffold-8260	19058	1	1.84E-28	21:A>T	21	1	0.994652	0.13369	0.86631	0.005348	0.128342	0.010638	0.231634	0.121136	8.38627	4.38095	1	0	0	0	0	0	1	0	0	0	0	0	0	0	0	0	2	2	0	0	0	0	0	0	0	0	0	0	0	2
23114644|F|0-55:G>A-55:G>A	TGCAGCTGCTGGCCAAAGAGACCCCCAGAAACCCAGGTAAAGCTCCTGGGGCACAGGTGTTTCCCCAGC	TGCAGCTGCTGGCCAAAGAGACCCCCAGAAACCCAGGTAAAGCTCCTGGGGCACAGGTGTTTCCCCAGC	KN289706.1_scaffold-17037	43084	1	1.84E-28	55:G>A	55	0.983957	1	0.002717	0.997283	0	0.002717	0	0.00542	0.00271	6.23377	4	1	0	0	0	0	0	0	0	0	0	0	0	0	0	0	0	0	0	0	0	0	0	0	0	0	0	0	0	0	0
23118561|F|0-19:C>T-19:C>T	TGCAGCTGCTGGCTGGGGCCAGCTAGCACCTGAGTCTACCTGACATAGCCTGTGCTGAGTGCTGGGAAG	TGCAGCTGCTGGCTGGGGCCAGCTAGCACCTGAGTCTACCTGACATAGCCTGTGCTGAGTGCTGGGAAG	KN278339.1_scaffold-773	51088	1	1.84E-28	19:C>T	19	0.962567	0.997222	0.005556	0.994444	0.002778	0.002778	0.00554	0.011049	0.008295	4.61905	3	1	0	0	0	-	0	-	0	0	0	0	0	-	-	0	0	0	0	0	0	0	0	0	0	0	0	0	-	0	0
23114646|F|0-14:G>A-14:G>A	TGCAGCTGCTGGGCGACAAGACTGGGTTTGAGTGGCCTGAGGGAAGGGTGTGATCTGCCAGGGGTGTGC	TGCAGCTGCTGGGCGACAAGACTGGGTTTGAGTGGCCTGAGGGAAGGGTGTGATCTGCCAGGGGTGTGC	KN287579.1_scaffold-13965	420721	1	1.84E-28	14:G>A	14	0.997326	1	0.010724	0.989276	0	0.010724	0	0.021218	0.010609	7.36617	3.66667	1	0	0	0	0	0	0	0	0	0	0	0	0	0	0	0	0	0	0	0	0	0	0	0	0	0	0	0	0	0
23114649|F|0-12:A>T-12:A>T	TGCAGCTGCTTGACTGCCAGATTTAAAGGTCACACTCTAGAAAGGCATGAGCGGTTCAGCAGGAATGCC	TGCAGCTGCTTGACTGCCAGATTTAAAGGTCACACTCTAGAAAGGCATG	KN278195.1_scaffold-570	88374	1	1.35E-17	12:A>T	12	0.973262	0.997253	0.021978	0.978022	0.002747	0.019231	0.005479	0.04299	0.024235	9.48352	7.25	1	0	0	0	0	0	0	0	0	0	2	0	0	0	0	0	0	0	0	0	0	0	0	0	0	0	0	0	0	0
23114655|F|0-6:T>C-6:T>C	TGCAGCTGGAAGGCTATGAACAACTGCATGTGGCTGAGGCACCTGTGCATGAGCGGTTCAGCAGGAATG	TGCAGCTGGAAGGCTATGAACAACTGCATGTGGCTGAGGCACCTGTGCATG	KN278998.1_scaffold-1711	21599	1	1.09E-18	6:T>C	6	0.983957	1	0.002717	0.997283	0	0.002717	0	0.00542	0.00271	9.73904	3	1	0	0	0	0	0	0	0	0	0	0	0	0	0	0	0	0	0	0	0	0	0	0	0	0	0	0	0	0	0
23114657|F|0-43:G>A-43:G>A	TGCAGCTGGAATAGGGTTAAGAGAGAACTGCTTGCAAGGGCTGGAGAGAAATAGCAGTCATTAGAGCAG	TGCAGCTGGAATAGGGTTAAGAGAGAACTGCTTGCAAGGGCTGGAGAGAAATAGCAGTCATTAGAGCAG	KN283668.1_scaffold-8332	266896	1	1.84E-28	43:G>A	43	0.997326	0.962466	0.19571	0.80429	0.037534	0.158177	0.072249	0.314816	0.193533	6.73392	4.02083	1	0	2	0	0	0	0	0	0	0	0	0	0	0	0	0	0	0	0	1	0	0	0	0	0	0	0	0	0	2
23114658|F|0-33:C>G-33:C>G	TGCAGCTGGACCTTCTCCCATGACCCGGCCTCGCTCTGTGCTGGCCACAAGCGTCTTCCTGCACAGACT	TGCAGCTGGACCTTCTCCCATGACCCGGCCTCGCTCTGTGCTGGCCACAAGCGTCTTCCTGCACAGACT	KN292720.1_scaffold-21461	198164	1	1.84E-28	33:C>G	33	1	0.946524	0.302139	0.697861	0.053476	0.248663	0.101233	0.421702	0.261467	7.34475	5.16216	1	0	0	0	2	2	0	0	0	0	0	0	2	0	0	2	0	0	0	0	2	2	2	0	0	0	0	0	2	0
23114659|F|0-30:G>C-30:G>C	TGCAGCTGGACGTAGCAGAGTAGAAGAGAGGAACATAAACGCTACTATTTCCCCCGGTCTCTGCATGAG	TGCAGCTGGACGTAGCAGAGTAGAAGAGAGGAACATAAACGCTACTATTTCCCCCGGTCTCTGCATGAG	KN287854.1_scaffold-14359	103674	1	2.38E-27	30:G>C	30	0.975936	0.994521	0.046575	0.953425	0.005479	0.041096	0.010899	0.088812	0.049856	6.40708	3.09091	1	0	0	0	0	0	0	0	0	0	0	0	0	0	0	0	0	0	0	0	0	0	0	0	0	0	0	0	-	0
23114672|F|0-68:G>A-68:G>A	TGCAGCTGGAGTACTGCGTCCAGTTCTGTGCACCGCACTTCAGGAAGGATGTGGAGAAGCTCAAGAGAG	TGCAGCTGGAGTACTGCGTCCAGTTCTGTGCACCGCACTTCAGGAAGGATGTGGAGAAGCTCAAGAGAG	KN280417.1_scaffold-3724	177158	10	1.84E-28	68:G>A	68	1	0.983957	0.080214	0.919786	0.016043	0.064171	0.031571	0.147559	0.089565	8.93723	4.47222	1	0	0	0	0	0	0	0	0	0	0	0	0	0	0	0	0	0	0	0	0	0	0	0	0	0	0	0	0	0
23114675|F|0-10:T>C-10:T>C	TGCAGCTGGATTGGCTGCCAAAAGCACCACTCACCCCTTGTAAACACACCTACAGCATCAGGCTGCAAG	TGCAGCTGGATTGGCTGCCAAAAGCACCACTCACCCCTTGTAAACACACCTACAGCATCAGGCTGCAAG	KN280283.1_scaffold-3542	311732	1	1.84E-28	10:T>C	10	0.986631	0.99729	0.03794	0.96206	0.00271	0.03523	0.005405	0.073002	0.039204	8.35421	3.88889	1	0	0	0	0	0	0	0	0	0	2	0	0	0	0	0	0	0	0	0	0	0	0	0	0	0	0	0	0	0
23114681|F|0-23:G>A-23:G>A	TGCAGCTGGCCAGTGATGTCAGCGCTGAACGCCAGCAGCGAGGATAAAAATGGTAGTGCATGAGCGGTT	TGCAGCTGGCCAGTGATGTCAGCGCTGAACGCCAGCAGCGAGGATAAAAATGGTAGTGCATG	KN279114.1_scaffold-1873	64766	1	1.20E-24	23:G>A	23	0.997326	1	0.048257	0.951743	0	0.048257	0	0.091857	0.045929	9.06424	5.55556	1	2	0	0	0	0	0	0	0	0	0	0	0	0	0	0	0	0	0	0	2	0	0	0	0	2	0	0	0	0
23114694|F|0-30:G>A-30:G>A	TGCAGCTGGGAGTGTGTGCCACTGGGCCAGGTCTGACTGGCTGCATGAGCGGTTCAGCAGGAATGCCGA	TGCAGCTGGGAGTGTGTGCCACTGGGCCAGGTCTGACTGGCTGCATG	KN281525.1_scaffold-5288	113810	1	1.60E-16	30:G>A	30	0.991979	1	0.002695	0.997305	0	0.002695	0	0.005376	0.002688	8.79355	6	1	0	0	0	0	0	0	0	0	0	0	0	0	0	0	0	0	0	0	0	0	0	0	0	0	0	0	0	0	0
23114698|F|0-33:G>C-33:G>C	TGCAGCTGGGATTTCATCATCAGCCCTAAGCATGTGTGCCTCAGTTTTCCCGGTCCCACACGTTGGCTA	TGCAGCTGGGATTTCATCATCAGCCCTAAGCATGTGTGCCTCAGTTTTCCCGGTCCCACACGTTGGCTA	JRXG01081350.1_scaffold-16328_1	1582	2	1.84E-28	33:G>C	33	0.989305	1	0.118919	0.881081	0	0.118919	0	0.209554	0.104777	7.06941	4.0566	1	2	0	0	0	0	2	2	0	2	0	0	0	0	0	0	0	0	0	2	0	2	0	0	0	2	0	0	0	0
23114710|F|0-47:C>A-47:C>A	TGCAGCTGGGCTGGGGAACCCCCCCAGCCCTCCCTGGGCAGCAGGTTCATGCATGAGCGGTTCAGCAGG	TGCAGCTGGGCTGGGGAACCCCCCCAGCCCTCCCTGGGCAGCAGGTTCATGCATG	JRXG01025547.1_scaffold-4825_1	39873	1	7.54E-21	47:C>A	47	0.991979	0.991914	0.048518	0.951482	0.008086	0.040431	0.016042	0.092327	0.054184	9.00437	5.05263	1	0	0	0	0	2	-	0	0	0	1	0	0	0	0	0	0	0	0	0	0	0	0	0	0	0	0	0	0	0
23114721|F|0-63:G>T-63:G>T	TGCAGCTGGGTGCTGCTCTGCTCCCCTCTCTTTCCCCCCCACAGCAGCTCCTCCTGCTGCACTGTGCTT	TGCAGCTGGGTGCTGCTCTGCTCCCCTCTCTTTCCCCCCCACAGCAGCTCCTCCTGCTGCACTGTGCTT	KN285538.1_scaffold-11003	13118	1	1.84E-28	63:G>T	63	0.997326	1	0.002681	0.997319	0	0.002681	0	0.005348	0.002674	6.34549	3	1	0	0	0	0	0	0	0	0	0	0	0	0	0	0	0	0	0	0	0	0	0	0	0	0	0	0	0	0	0
23114722|F|0-24:C>T-24:C>T	TGCAGCTGGGTGGCCTCTCACACCCGGGCCTCTCACACCCTAAGGCATGAGCGGTTCAGCAGGAATGCC	TGCAGCTGGGTGGCCTCTCACACCCGGGCCTCTCACACCCTAAGGCATG	KN291924.1_scaffold-20307	2800	1	1.35E-17	24:C>T	24	0.986631	1	0.01084	0.98916	0	0.01084	0	0.021445	0.010723	9.09492	6.5	1	0	0	0	0	0	0	0	0	0	0	0	0	0	0	0	0	0	0	0	0	0	0	0	0	0	0	0	-	0
23114723|F|0-30:G>A-30:G>A	TGCAGCTGGGTGGGAAACCTGTGCCCAGGGGATGGTGGAAGCACAGCACTTGGCTGGACAGGGTGTGGG	TGCAGCTGGGTGGGAAACCTGTGCCCAGGGGATGGTGGAAGCACAGCACTTGGCTGGACAGGGTGTGGG	KN281749.1_scaffold-5604	30261	1	1.84E-28	30:G>A	30	0.997326	1	0.005362	0.994638	0	0.005362	0	0.010666	0.005333	5.49569	3.5	1	0	0	0	0	0	0	0	0	0	0	0	-	0	0	0	0	0	0	0	0	0	0	0	0	0	0	0	0	0
23114740|F|0-27:G>T-27:G>T	TGCAGCTGGTGTTCCCACTTCCAGGTGGCCTCTGTATGCTGTGCCTCCTCCACCCAGGCCTCATGAAAC	TGCAGCTGGTGTTCCCACTTCCAGGTGGCCTCTGTATGCTGTGCCTCCTCCACCCAGGCCTCATGAAAC	KN291035.1_scaffold-19009	48046	4	1.84E-28	27:G>T	27	1	1	0.02139	0.97861	0	0.02139	0	0.041866	0.020933	9.4766	3.375	1	0	0	0	0	0	0	0	0	0	0	0	0	0	0	0	0	0	0	0	0	0	0	0	0	0	0	0	0	0
23114742|F|0-12:C>G-12:C>G	TGCAGCTGGTTTCTGGATGTCAGGCAAAATGAACAGGGTTGATCTCTGCCTTGCCCTGTTTCTTACTTG	TGCAGCTGGTTTCTGGATGTCAGGCAAAATGAACAGGGTTGATCTCTGCCTTGCCCTGTTTCTTACTTG	KN284940.1_scaffold-10147	27605	1	1.84E-28	12:C>G	12	0.997326	1	0.010724	0.989276	0	0.010724	0	0.021218	0.010609	8.40129	4.6	1	0	0	0	0	0	0	0	0	0	0	0	0	0	0	0	0	0	0	0	0	0	0	0	0	0	0	0	0	0
23114771|F|0-10:C>T-10:C>T	TGCAGCTGTGCCGGGCAGATGTAGGACAGAGACTAAGAGAGCTGGCGATGCCAAGCTCAGCTCCCTGCC	TGCAGCTGTGCCGGGCAGATGTAGGACAGAGACTAAGAGAGCTGGCGATGCCAAGCTCAGCTCCCTGCC	KN288185.1_scaffold-14824	412040	1	1.84E-28	10:C>T	10	0.975936	1	0.008219	0.991781	0	0.008219	0	0.016303	0.008152	5.25821	3	1	0	0	-	0	0	0	0	0	0	0	0	0	0	0	0	0	0	0	0	0	0	0	0	0	0	0	0	-	0
23110327|F|0-40:T>C-40:T>C	TGCAGCTGTGCTAGGAATGGGGTCTGTGCCCTGCTTCCCCTTGTCCCCTCTTGCCTGGAGCCAGGCACA	TGCAGCTGTGCTAGGAATGGGGTCTGTGCCCTGCTTCCCCTTGTCCCCTCTTGCCTGGAGCCAGGCACA		0	0	999	40:T>C	40	0.911765	0.991202	0.158358	0.841642	0.008798	0.14956	0.017441	0.266561	0.142001	6.41549	2.96875	1	0	0	0	-	-	0	0	-	2	1	0	0	0	-	0	0	0	0	-	0	-	0	0	0	0	0	0	0	0
23114781|F|0-10:G>C-10:G>C	TGCAGCTGTGGCCTCCTAGCTCTAGGCAGTGCTAGGCATGAGCGGTTCAGCAGGAATGCCGAGACCGAT	TGCAGCTGTGGCCTCCTAGCTCTAGGCAGTGCTAGGCATG	KN278140.1_scaffold-496	75115	1	8.50E-13	10:G>C	10	0.997326	0.994638	0.024129	0.975871	0.005362	0.018767	0.010666	0.047093	0.02888	11.92009	9	1	0	0	0	0	0	0	0	0	0	0	0	0	0	0	0	0	0	0	0	0	0	0	0	0	0	0	0	0	0
23114790|F|0-59:C>T-59:C>T	TGCAGCTGTGGTTTTTGCCTCCCAGCCACCAGGTGTGGGCAGTGAGTGACAGGGCCCCTCCACTAATCA	TGCAGCTGTGGTTTTTGCCTCCCAGCCACCAGGTGTGGGCAGTGAGTGACAGGGCCCCTCCACTAATCA	KN280760.1_scaffold-4183	221062	1	1.84E-28	59:C>T	59	0.989305	1	0.002703	0.997297	0	0.002703	0	0.005391	0.002695	6.25108	5	1	0	0	0	0	0	0	0	0	0	0	0	0	0	0	0	0	0	0	0	0	0	0	0	0	0	0	0	0	0
23114799|F|0-9:T>C-9:T>C	TGCAGCTGTTCCTCTGAAAGCCAGTGGGAGGTACAGGCTTTCAGACGTTGCATGAGCGGTTCAGCAGGA	TGCAGCTGTTCCTCTGAAAGCCAGTGGGAGGTACAGGCTTTCAGACGTTGCATG	KN284489.1_scaffold-9506	148006	1	2.62E-20	9:T>C	9	0.989305	1	0.062162	0.937838	0	0.062162	0	0.116596	0.058298	9.88627	4.72414	1	0	0	0	0	0	2	0	0	2	0	2	0	0	0	0	2	0	0	0	0	0	0	0	0	0	0	0	0	0
23114800|F|0-35:A>G-35:A>G	TGCAGCTGTTGAGTGCAGAACTTTAAAAAAGGGGGAAAAAAATGCTCCTGGACAGCTCACTGAGCATGA	TGCAGCTGTTGAGTGCAGAACTTTAAAAAAGGGGGAAAAAAATGCTCCTGGACAGCTCACTGAGCATGA		0	0	999	35:A>G	35	1	0.994652	0.058824	0.941176	0.005348	0.053476	0.010638	0.110727	0.060682	8.3469	4.34615	1	0	0	0	0	0	0	0	0	0	0	2	0	0	0	0	0	0	0	0	0	0	0	0	0	0	0	0	0	0
23114814|F|0-47:T>C-47:T>C	TGCAGCTTACGAGTGACGCATGGTTAAATTCACCAGCTACATCACCATAGCAGCATGAGCGGTTCAGCA	TGCAGCTTACGAGTGACGCATGGTTAAATTCACCAGCTACATCACCATAGCAGCATG	KN289409.1_scaffold-16584	312006	1	2.90E-20	47:T>C	47	1	0.812834	0.628342	0.371658	0.187166	0.441176	0.304269	0.467057	0.385663	8.85904	8.60417	1	0	2	2	1	1	2	0	0	2	2	2	0	1	1	0	1	0	0	1	0	2	1	1	1	2	0	2	2	0
23114825|F|0-51:G>A-51:G>A	TGCAGCTTCAGGCGGCTGTGTGCAGGGGGCTCCGGGAGCTGGCGCGGCCTCGCAGCGGTCCTCTGCCTG	TGCAGCTTCAGGCGGCTGTGTGCAGGGGGCTCCGGGAGCTGGCGCGGCCTCGCAGCGGTCCTCTGCCTG	KN286837.1_scaffold-12895	202146	1	1.84E-28	51:G>A	51	0.994652	0.997312	0.056452	0.943548	0.002688	0.053763	0.005362	0.10653	0.055946	7.13704	3.48	1	0	0	0	0	0	0	0	0	0	0	0	0	0	0	0	0	0	0	0	0	0	0	0	0	-	0	0	0	0
23114827|F|0-34:A>T-34:A>T	TGCAGCTTCATCATTCACCCCCCTCCCAGCTCCAACCCCTACACAGCTTACAAGTAACAGCAGCACTGG	TGCAGCTTCATCATTCACCCCCCTCCCAGCTCCAACCCCTACACAGCTTACAAGTAACAGCAGCACTGG	KN283898.1_scaffold-8654	153772	1	1.84E-28	34:A>T	34	1	1	0.002674	0.997326	0	0.002674	0	0.005333	0.002667	9.19574	5	1	0	0	0	0	0	0	0	0	0	0	0	0	0	0	0	0	0	0	0	0	0	0	0	0	0	0	0	0	0
23114829|F|0-23:T>G-23:T>G	TGCAGCTTCCAAAATGCTGAAACTGTTTAGAGTACAGCTTGGTAAGCCCATCTGGGACTGTGAGCAGGA	TGCAGCTTCCAAAATGCTGAAACTGTTTAGAGTACAGCTTGGTAAGCCCATCTGGGACTGTGAGCAGGA	KN289008.1_scaffold-16005	199253	1	1.84E-28	23:T>G	23	0.986631	1	0.00271	0.99729	0	0.00271	0	0.005405	0.002703	8.39871	3	1	0	0	0	0	0	0	0	0	0	0	0	0	0	0	0	2	0	0	0	0	0	0	0	0	0	0	0	0	0
23114830|F|0-18:A>T-18:A>T	TGCAGCTTCCAAACCACCATTGGCACAGTCGCTTGTTCTTCCAAAGTCAAAGCAGGCAAAGGAATTAGC	TGCAGCTTCCAAACCACCATTGGCACAGTCGCTTGTTCTTCCAAAGTCAAAGCAGGCAAAGGAATTAGC	KN288693.1_scaffold-15561	201549	1	8.58E-27	18:A>T	18	0.991979	0.919137	0.385445	0.614555	0.080863	0.304582	0.148648	0.473754	0.311201	7.61321	5.55	1	0	2	0	0	2	2	2	0	2	2	0	1	2	1	1	2	1	1	2	0	2	0	0	2	0	0	0	0	2
23114831|F|0-31:C>T-31:C>T	TGCAGCTTCCAACCTTTGTCACAAAATTGCACTTCAAAATTAATGTAGTGCAAAAAGCTTGAAAAAGTG	TGCAGCTTCCAACCTTTGTCACAAAATTGCACTTCAAAATTAATGTAGTGCAAAAAGCTTGAAAAAGTG	KN285442.1_scaffold-10875	17709	1	1.84E-28	31:C>T	31	0.927807	1	0.005764	0.994236	0	0.005764	0	0.011461	0.00573	3.48485	3	1	0	0	-	0	-	0	-	0	0	0	0	0	-	0	0	0	0	0	0	0	0	0	0	0	0	0	0	0	0
23114834|F|0-9:C>G-9:C>G	TGCAGCTTCCCAGGACTCTTTTTTGATATTATCTGTTTTGCTATGATGCCTGCATGAGCGGTTCAGCAG	TGCAGCTTCCCAGGACTCTTTTTTGATATTATCTGTTTTGCTATGATGCCTGCATG	KN278228.1_scaffold-615	26036	1	2.17E-21	9:C>G	9	0.97861	1	0.002732	0.997268	0	0.002732	0	0.00545	0.002725	7.32244	3	1	0	0	0	0	0	0	0	0	0	0	0	0	0	0	0	0	0	0	0	0	0	0	0	0	0	0	0	0	0
23114837|F|0-22:G>C-22:G>C	TGCAGCTTCCCCCTAGAAGCCTGCTAGCCCAGCAGCTGCTGGCCCCAAAAGTGCATGAGCGGTTCAGCA	TGCAGCTTCCCCCTAGAAGCCTGCTAGCCCAGCAGCTGCTGGCCCCAAAAGTGCATG	KN287667.1_scaffold-14091	7790	1	6.23E-22	22:G>C	22	0.906417	1	0.017699	0.982301	0	0.017699	0	0.034772	0.017386	7.15865	4.5	1	0	0	0	0	0	0	0	0	0	0	0	0	0	0	0	0	0	0	0	0	0	0	0	0	0	0	0	-	0
23114863|F|0-37:G>A-37:G>A	TGCAGCTTGACACTAAGAGAGGTAGTACAGGGGCTAGGGGAGGTACACGGAGCCCAGGGAAGCAGCATG	TGCAGCTTGACACTAAGAGAGGTAGTACAGGGGCTAGGGGAGGTACACGGAGCCCAGGGAAGCAGCATG	KN286459.1_scaffold-12348	346270	1	1.84E-28	37:G>A	37	1	0.951872	0.347594	0.652406	0.048128	0.299465	0.091624	0.453545	0.272584	8.48423	6.39024	1	2	2	2	0	2	0	0	2	0	0	2	0	2	2	0	2	0	0	2	0	2	2	0	2	0	2	2	0	2
23110329|F|0-66:T>C-66:T>C	TGCAGCTTGAGGTGCAGTTTCCCCCAAACCTATCTCTTTGAACCTGGCAGACTTTGTTGCTTCCACTGG	TGCAGCTTGAGGTGCAGTTTCCCCCAAACCTATCTCTTTGAACCTGGCAGACTTTGTTGCTTCCACTGG	KN280627.1_scaffold-4012	271431	5	1.84E-28	66:T>C	66	0.687166	0.992218	0.015564	0.984436	0.007782	0.007782	0.015443	0.030644	0.023043	5.79874	4.5	1	-	0	0	-	-	0	-	-	-	-	-	0	0	0	-	0	0	0	-	-	-	-	-	-	0	0	0	0	-
23114871|F|0-26:A>C-26:A>C	TGCAGCTTGAGGTGGAGTTTCCCCCAAGCCCCTGCACCTGTCTCCTTGAAACCTAGCAGGCTTTGTGGC	TGCAGCTTGAGGTGGAGTTTCCCCCAAGCCCCTGCACCTGTCTCCTTGAAACCTAGCAGGCTTTGTGGC	KN282348.1_scaffold-6427	1004	10	1.84E-28	26:A>C	26	0.994652	1	0.037634	0.962366	0	0.037634	0	0.072436	0.036218	6.35118	2.72222	1	0	0	0	0	0	0	0	0	0	0	0	0	0	0	0	0	0	0	0	0	0	0	0	0	0	0	0	0	0
23114874|F|0-57:A>T-57:A>T	TGCAGCTTGCAAAATGCTGGGGAAAACAGACTTTTCCTGACACGGGTGGCCTTGTGCAGCCATGCTTGT	TGCAGCTTGCAAAATGCTGGGGAAAACAGACTTTTCCTGACACGGGTGGCCTTGTGCAGCCATGCTTGT	KN282509.1_scaffold-6651	154038	1	1.84E-28	57:A>T	57	1	0.954545	0.406417	0.593583	0.045455	0.360963	0.086777	0.482484	0.284631	10.26949	6.86702	1	2	0	2	0	1	2	2	0	0	0	0	2	0	0	2	0	0	0	2	2	0	0	0	0	2	0	0	0	2
23114878|F|0-7:T>G-7:T>G	TGCAGCTTGCCCCACATTACATGAAGCGAGCTGCATGAGCGGTTCAGCAGGAATGCCGAGACCGATCTC	TGCAGCTTGCCCCACATTACATGAAGCGAGCTGCATG	KN288539.1_scaffold-15337	3192	1	3.16E-11	7:T>G	7	0.986631	1	0.00271	0.99729	0	0.00271	0	0.005405	0.002703	7.24838	3	1	0	0	0	0	0	0	0	0	2	0	0	0	0	0	0	0	0	0	0	0	0	0	0	0	0	0	0	0	0
23114882|F|0-60:G>A-60:G>A	TGCAGCTTGGAGCCTGGCTTGCAGCTACAGCATGGCTCCAGCCAGCTTGGCTCCCTTTTGGGTGGCATG	TGCAGCTTGGAGCCTGGCTTGCAGCTACAGCATGGCTCCAGCCAGCTTGGCTCCCTTTTGGGTGGCATG	KN284459.1_scaffold-9461	244219	1	1.84E-28	60:G>A	60	0.997326	1	0.042895	0.957105	0	0.042895	0	0.082111	0.041055	7.55556	4.40909	1	0	0	0	0	0	0	0	0	0	0	0	0	0	0	0	0	0	0	0	0	0	0	0	0	0	0	0	0	0
23114884|F|0-46:C>T-46:C>T	TGCAGCTTGGCAAAAAGTGACCTGAGGGGTTACAGTGGAGAATAAGCTGAATATGAGCCAACAGCATGA	TGCAGCTTGGCAAAAAGTGACCTGAGGGGTTACAGTGGAGAATAAGCTGAATATGAGCCAACAGCATGA	KN282383.1_scaffold-6474	434093	6	6.63E-28	46:C>T	46	0.994652	1	0.013441	0.986559	0	0.013441	0	0.02652	0.01326	10.74249	5	1	0	0	0	0	0	0	0	0	0	0	0	0	0	0	0	0	0	0	0	0	0	0	0	0	0	0	0	0	0
23114889|F|0-54:C>T-54:C>T	TGCAGCTTGGGCACTGGTACCTGGCGCAAGGGGCCTGGCTTCCCAAACCCATTGCACTGTGTTCACTGT	TGCAGCTTGGGCACTGGTACCTGGCGCAAGGGGCCTGGCTTCCCAAACCCATTGCACTGTGTTCACTGT	KN281705.1_scaffold-5545	5982	10	1.84E-28	54:C>T	54	0.997326	0.994638	0.096515	0.903485	0.005362	0.091153	0.010666	0.174399	0.092533	7.19742	3.26667	1	0	0	0	0	0	0	0	0	0	0	0	0	0	0	0	0	0	0	2	0	0	0	0	0	0	0	0	0	0
23114897|F|0-9:T>C-9:T>C	TGCAGCTTGTCCGAGGAGCCTGGGGAGGTAGCTCCTGCCACTGCATGAGCGGTTCAGCAGGAATGCCGA	TGCAGCTTGTCCGAGGAGCCTGGGGAGGTAGCTCCTGCCACTGCATG	KN287534.1_scaffold-13893	307887	1	1.60E-16	9:T>C	9	0.994652	0.994624	0.024194	0.975806	0.005376	0.018817	0.010695	0.047216	0.028956	7.73478	4.44444	1	0	0	0	0	0	0	0	0	0	0	0	0	2	0	0	0	0	0	0	0	0	0	0	0	0	0	0	2	0
23114898|F|0-36:C>G-36:C>G	TGCAGCTTGTCCTCAAGTCTGAGTCCAGCTCCTTCACTCCATAGTCCTGGCTGACCAAGCCAGTGAGAT	TGCAGCTTGTCCTCAAGTCTGAGTCCAGCTCCTTCACTCCATAGTCCTGGCTGACCAAGCCAGTGAGAT	KN286625.1_scaffold-12587	55567	1	1.84E-28	36:C>G	36	0.994652	1	0.032258	0.967742	0	0.032258	0	0.062435	0.031217	7.67957	3.33333	1	0	0	0	0	0	0	0	0	0	0	0	0	0	0	0	0	0	0	0	0	0	0	0	0	0	0	0	0	0
23114899|F|0-6:T>G-6:T>G	TGCAGCTTGTGGGCAGCATTCAGCATTGCACACAGCATATGGACCCAAGCTGAACGTGGCACCCCAAAC	TGCAGCTTGTGGGCAGCATTCAGCATTGCACACAGCATATGGACCCAAGCTGAACGTGGCACCCCAAAC	KN283658.1_scaffold-8317	115929	1	1.84E-28	6:T>G	6	1	1	0.002674	0.997326	0	0.002674	0	0.005333	0.002667	10.76596	3	1	0	0	0	0	0	0	0	0	0	0	0	0	0	0	0	0	0	0	0	0	0	0	0	0	0	0	0	0	0
23114907|F|0-23:C>T-23:C>T	TGCAGCTTTAAGCCCTTCCCAGTCTGACCCCACATGCTACTACTGAAAACAGAAGTGGGATGGGAAGGT	TGCAGCTTTAAGCCCTTCCCAGTCTGACCCCACATGCTACTACTGAAAACAGAAGTGGGATGGGAAGGT	KN279544.1_scaffold-2487	135540	1	1.84E-28	23:C>T	23	0.997326	0.997319	0.058981	0.941019	0.002681	0.0563	0.005348	0.111005	0.058176	6.88602	3.95833	1	0	2	0	0	0	0	0	0	0	0	0	0	0	0	0	0	0	0	0	0	0	2	0	0	0	0	0	0	0
23114909|F|0-56:C>T-56:C>T	TGCAGCTTTAGCCAGGGAGCAGAGAGAAGCGGCGAGCCCAGCTGAGGAGGACAGCCCCACTCAGCCCAG	TGCAGCTTTAGCCAGGGAGCAGAGAGAAGCGGCGAGCCCAGCTGAGGAGGACAGCCCCACTCAGCCCAG	KN291213.1_scaffold-19269	28146	1	1.84E-28	56:C>T	56	1	1	0.02139	0.97861	0	0.02139	0	0.041866	0.020933	10.54681	6	1	0	0	0	0	0	0	0	0	0	0	0	0	0	0	0	0	0	0	0	0	0	0	0	0	0	0	0	0	0
23114926|F|0-33:T>C-33:T>C	TGCAGCTTTCCTATTGCTGCTCCTACCGCAAACTTATCTTTTTTGGCATGAGCGGTTCAGCAGGAATGC	TGCAGCTTTCCTATTGCTGCTCCTACCGCAAACTTATCTTTTTTGGCATG	KN288692.1_scaffold-15560	18572	1	3.91E-18	33:T>C	33	0.967914	1	0.002762	0.997238	0	0.002762	0	0.00551	0.002755	10.49669	3	1	0	0	0	0	0	0	0	0	0	0	0	0	0	0	0	0	0	0	0	0	0	0	0	0	0	0	0	0	0
23114936|F|0-40:C>T-40:C>T	TGCAGCTTTTATTTACCAACCTTGGCATTTCGTGCCACCTCGCTAGCTGGCACCTCTAGCATGAGCGGT	TGCAGCTTTTATTTACCAACCTTGGCATTTCGTGCCACCTCGCTAGCTGGCACCTCTAGCATG	KN282125.1_scaffold-6120	361963	1	3.43E-25	40:C>T	40	1	1	0.018717	0.981283	0	0.018717	0	0.036733	0.018366	10.63248	5.25	1	0	0	0	0	0	0	0	0	0	0	0	0	0	0	0	0	0	0	0	0	0	0	0	0	0	0	0	0	0
23114941|F|0-5:C>T-5:C>T	TGCAGCTTTTCCTCCTGCTGTTGTGGACCTGCCTCTTTCTTGAATTCGAGCATGAGCGGTTCAGCAGGA	TGCAGCTTTTCCTCCTGCTGTTGTGGACCTGCCTCTTTCTTGAATTCGAGCATG	KN286015.1_scaffold-11694	12061	1	2.62E-20	5:C>T	5	1	1	0.026738	0.973262	0	0.026738	0	0.052046	0.026023	12.59362	7	1	0	0	0	0	0	0	0	0	0	0	0	0	0	0	0	0	0	0	0	0	0	0	0	0	0	2	0	0	0
23114951|F|0-23:C>T-23:C>T	TGCAGCTTTTTGGTCTCCTGGTGCAGGTGCACCTCCTCATGGAGTTTGAGCATGAGCGGTTCAGCAGGA	TGCAGCTTTTTGGTCTCCTGGTGCAGGTGCACCTCCTCATGGAGTTTGAGCATG	KN282918.1_scaffold-7254	21226	1	2.62E-20	23:C>T	23	1	0.986631	0.106952	0.893048	0.013369	0.093583	0.026381	0.191026	0.108703	13.92672	7.89796	1	0	0	0	0	0	0	0	0	0	0	0	0	2	0	0	0	0	0	0	0	0	0	0	0	0	0	0	0	0
23114957|F|0-30:T>C-30:T>C	TGCAGGAAAACACAGGCTGAGCACGGGCCATGTATGCCAGCCAATCAGGTCTGCTTTATGTACTGTTGC	TGCAGGAAAACACAGGCTGAGCACGGGCCATGTATGCCAGCCAATCAGGTCTGCTTTATGTACTGTTGC	JRXG01041055.1_scaffold-7932_1	68044	1	1.84E-28	30:T>C	30	0.975936	1	0.005479	0.994521	0	0.005479	0	0.010899	0.005449	6.12664	4.33333	1	0	0	0	0	0	0	0	0	0	0	0	0	0	0	0	0	0	0	0	0	0	0	0	0	0	0	0	0	0
23114966|F|0-20:T>A-20:T>A	TGCAGGAAACTTGGTGCAAATCTTCTCCCTAATCCCTTCATCTGTAGACACCTTACTGAAAACATTTAC	TGCAGGAAACTTGGTGCAAATCTTCTCCCTAATCCCTTCATCTGTAGACACCTTACTGAAAACATTTAC	KN292356.1_scaffold-20945	116638	3	1.84E-28	20:T>A	20	0.981283	0.997275	0.021798	0.978202	0.002725	0.019074	0.005435	0.042646	0.024041	4.57301	3	1	0	0	0	0	0	0	0	0	0	0	0	0	0	0	0	0	0	0	-	0	-	0	0	0	0	0	0	0	0
23114968|F|0-43:A>G-43:A>G	TGCAGGAAAGATTGGTAGAGGAAGATCTAACTGGCAGATCTCTATCAAGTTGGGGTGTGACGTAGATGC	TGCAGGAAAGATTGGTAGAGGAAGATCTAACTGGCAGATCTCTATCAAGTTGGGGTGTGACGTAGATGC	KN283659.1_scaffold-8319	13332	1	8.58E-27	43:A>G	43	0.981283	0.002725	0.997275	0.002725	0.997275	0	0.005435	0.005435	0.005435	7	5.8443	1	1	1	1	1	1	1	1	1	1	1	1	1	1	1	1	1	1	1	1	1	1	1	1	1	1	1	1	1	1
23114972|F|0-37:C>T-37:C>T	TGCAGGAAAGTTCCCAGCAATTCATAGTATGCCCCTCCCGACTCCCTGTGGGTTGGCCAAAAGCATCCT	TGCAGGAAAGTTCCCAGCAATTCATAGTATGCCCCTCCCGACTCCCTGTGGGTTGGCCAAAAGCATCCT	KN291856.1_scaffold-20196	5950	11	3.08E-26	37:C>T	37	0.997326	0.994638	0.482574	0.517426	0.005362	0.477212	0.010666	0.499393	0.25503	6.94861	4.33929	1	0	2	2	0	2	0	2	2	0	0	2	2	2	0	2	0	0	0	0	2	2	2	0	2	2	2	0	0	2
23114973|F|0-63:T>C-63:T>C	TGCAGGAAAGTTGAAAAGCCCCACCGGAACCAGGGGGAGGGGGGAGCCAGGGAGAAAGAGCGCTGGTGG	TGCAGGAAAGTTGAAAAGCCCCACCGGAACCAGGGGGAGGGGGGAGCCAGGGAGAAAGAGCGCTGGTGG	KN285095.1_scaffold-10363	230287	2	1.84E-28	63:T>C	63	1	0.986631	0.139037	0.860963	0.013369	0.125668	0.026381	0.239412	0.132896	8.50324	4.52459	1	0	2	0	0	0	2	0	2	0	0	0	0	0	0	0	2	0	0	0	0	0	0	0	0	0	2	0	0	0
23114977|F|0-28:A>G-28:A>G	TGCAGGAAATTCCTGTAGGAGCTGGTGGAGGCTGTGGCCCATGGTGTGAGGATGCATGAGCGGTTCAGC	TGCAGGAAATTCCTGTAGGAGCTGGTGGAGGCTGTGGCCCATGGTGTGAGGATGCATG	KN277973.1_scaffold-269	118301	1	1.79E-22	28:A>G	28	0.997326	1	0.029491	0.970509	0	0.029491	0	0.057242	0.028621	10.00857	5.15385	1	0	0	0	0	0	0	0	0	0	0	0	0	0	0	0	0	0	0	0	0	0	0	0	0	0	0	0	0	0
23114992|F|0-24:A>G-24:A>G	TGCAGGAAGATTTAAAAGTCCCACAGGAACCTGGGAGGAGGAGGAGGCGAGAAGGGAGAGTGCTGGCGT	TGCAGGAAGATTTAAAAGTCCCACAGGAACCTGGGAGGAGGAGGAGGCGAGAAGGGAGAGTGCTGGCGT	KN288671.1_scaffold-15530	246278	1	1.84E-28	24:A>G	24	1	0.989305	0.112299	0.887701	0.010695	0.101604	0.021162	0.199377	0.110269	9.08817	4.75472	1	0	0	0	0	0	0	0	0	0	0	0	2	0	0	2	0	0	0	0	0	0	0	0	0	0	0	0	0	0
23115000|F|0-49:C>T-49:C>T	TGCAGGAAGCCCATGCAGGCAGCTTGGCAGCAGCCCAAGAAAGCAGGCTCGACCCAAGAAAAGTGGCAT	TGCAGGAAGCCCATGCAGGCAGCTTGGCAGCAGCCCAAGAAAGCAGGCTCGACCCAAGAAAAGTGGCAT	KN292363.1_scaffold-20957	80744	7	1.84E-28	49:C>T	49	0.983957	0.994565	0.086957	0.913043	0.005435	0.081522	0.01081	0.15879	0.0848	6.52423	3.54762	1	0	0	2	2	2	0	0	0	0	0	0	0	0	0	0	0	0	0	0	0	2	0	0	0	2	0	0	0	2
23115010|F|0-19:G>C-19:G>C	TGCAGGAAGGAGCTCCCCTGGCCATTCATCAGCTCTCCAGTTGCATGAGCGGTTCAGCAGGAATGCCGA	TGCAGGAAGGAGCTCCCCTGGCCATTCATCAGCTCTCCAGTTGCATG		0	0	999	19:G>C	19	0.989305	1	0.02973	0.97027	0	0.02973	0	0.057692	0.028846	9.41595	5.90909	1	0	0	0	0	0	0	0	0	0	2	0	0	0	0	0	0	0	0	0	0	0	0	0	0	0	0	0	0	0
23115011|F|0-48:G>A-48:G>A	TGCAGGAAGGCAGCCTCCATGCAAAAGCCCCATTCGCCTCCAGGGGCAGGGGCAGCAGGGCATGAGCGG	TGCAGGAAGGCAGCCTCCATGCAAAAGCCCCATTCGCCTCCAGGGGCAGGGGCAGCAGGGCATG	KN282920.1_scaffold-7257	121232	1	9.81E-26	48:G>A	48	1	0.986631	0.152406	0.847594	0.013369	0.139037	0.026381	0.258357	0.142369	6.80603	4.14493	1	0	1	0	0	0	0	2	0	0	0	2	0	0	2	2	2	0	0	0	2	0	2	0	0	0	2	0	0	0
23115026|F|0-42:C>T-42:C>T	TGCAGGAATATAAGACAACTATTATTGTTTGTCTAACACTTGCACATTATACAGTCATGGTAAAGCAGG	TGCAGGAATATAAGACAACTATTATTGTTTGTCTAACACTTGCACATTATACAGTCATGGTAAAGCAGG	KN288505.1_scaffold-15286	302132	1	1.84E-28	42:C>T	42	0.965241	1	0.00277	0.99723	0	0.00277	0	0.005525	0.002762	6.45495	3	1	0	0	0	0	0	0	0	0	0	0	0	0	0	0	0	0	0	0	0	0	0	0	0	0	0	0	0	0	0
23111030|F|0-11:G>A-11:G>A	TGCAGGAATCAGAGCCAAAATGATCCCTACAGGGCTGCGGGGCATTCTCTCCCCCTGATTTAAAGGGCC	TGCAGGAATCAGAGCCAAAATGATCCCTACAGGGCTGCGGGGCATTCTCTCCCCCTGATTTAAAGGGCC	KN279264.1_scaffold-2090	158083	1	1.84E-28	11:G>A	11	0.997326	1	0.010724	0.989276	0	0.010724	0	0.021218	0.010609	7.26124	3.8	1	0	0	0	0	0	0	0	0	0	0	0	2	0	2	2	0	0	0	0	0	0	0	0	0	0	0	0	0	0
23115029|F|0-17:G>C-17:G>C	TGCAGGAATCTGATACCGATGATTCTGGCTCACTCAGAAGTGACCCAGATGCAGCAAGTAATAAGCCAG	TGCAGGAATCTGATACCGATGATTCTGGCTCACTCAGAAGTGACCCAGATGCAGCAAGTAATAAGCCAG	KN280729.1_scaffold-4148	17191	1	1.84E-28	17:G>C	17	1	0.989305	0.149733	0.850267	0.010695	0.139037	0.021162	0.254626	0.137894	7.68683	4.35616	1	0	0	0	0	0	1	2	0	0	0	0	0	0	2	0	0	0	0	0	0	2	2	0	0	0	0	2	0	1
23115033|F|0-5:G>A-5:G>A	TGCAGGAATGGATCTGGGGGTTATCATGGACAATAAGACAAATATAAGCCAACAGCATGAGCGGTTCAG	TGCAGGAATGGATCTGGGGGTTATCATGGACAATAAGACAAATATAAGCCAACAGCATG	KN284795.1_scaffold-9954	92878	1	5.12E-23	5:G>A	5	0.994652	1	0.02957	0.97043	0	0.02957	0	0.057391	0.028696	7.01302	4.07692	1	0	2	0	0	0	0	0	0	0	0	0	0	0	0	0	0	0	0	0	0	0	2	0	0	0	0	0	0	0
23115035|F|0-20:G>A-20:G>A	TGCAGGAATGGCGTTGGACCGGTCCTAGTCCTTGGGCTGGACTGGGTTCACAGACAAGCCCTGCATGAG	TGCAGGAATGGCGTTGGACCGGTCCTAGTCCTTGGGCTGGACTGGGTTCACAGACAAGCCCTGCATGAG	KN293892.1_scaffold-23240	29217	1	2.38E-27	20:G>A	20	0.989305	0.978378	0.183784	0.816216	0.021622	0.162162	0.042308	0.300015	0.171161	7.40263	4.22619	1	0	0	0	0	0	0	0	0	0	0	2	2	0	0	0	0	0	0	2	0	0	0	0	0	0	0	0	-	0
23115041|F|0-20:C>T-20:C>T	TGCAGGACAAGACTGCGGTGCGCTGCCAGGACAGCAGGGCATGAGCGGTTCAGCAGGAATGCCGAGACC	TGCAGGACAAGACTGCGGTGCGCTGCCAGGACAGCAGGGCATG	KN277831.1_scaffold-73	1103500	1	2.19E-14	20:C>T	20	0.997326	1	0.008043	0.991957	0	0.008043	0	0.015956	0.007978	9.03871	7	1	0	0	0	0	0	0	0	0	0	0	0	0	2	0	0	0	0	0	0	0	0	0	0	0	0	0	0	0	0
23115045|F|0-28:C>T-28:C>T	TGCAGGACACAGTTCTCCACATTGCCCACCTGCATTCCTAGCCATGTGCATAGATGCAGCTGCATGAGC	TGCAGGACACAGTTCTCCACATTGCCCACCTGCATTCCTAGCCATGTGCATAGATGCAGCTGCATGAGC	KN287796.1_scaffold-14270	22221	1	8.58E-27	28:C>T	28	0.991979	0.997305	0.021563	0.978437	0.002695	0.018868	0.005376	0.042197	0.023787	7.75269	4.33333	1	0	0	0	0	0	0	0	0	0	0	0	0	0	0	0	0	0	0	0	0	0	0	0	0	0	0	0	0	0
23115048|F|0-27:T>G-27:T>G	TGCAGGACACGGGCCTGTGCTCTGCCATCCGTGCATGAGCGGTTCAGCAGGAATGCCGAGACCGATCTC	TGCAGGACACGGGCCTGTGCTCTGCCATCCGTGCATG		0	0	999	27:T>G	27	0.951872	1	0.008427	0.991573	0	0.008427	0	0.016712	0.008356	9.69284	5	1	0	0	0	0	-	0	0	2	0	0	0	0	2	0	-	0	0	0	0	0	0	0	0	0	0	0	-	-	0
23115053|F|0-33:T>C-33:T>C	TGCAGGACAGATGACAGGGCCCCATGCGCCAGATTGGGTCAGCATGAGCGGTTCAGCAGGAATGCCGAG	TGCAGGACAGATGACAGGGCCCCATGCGCCAGATTGGGTCAGCATG	KN278488.1_scaffold-982	298919	1	5.50E-16	33:T>C	33	0.986631	0.99729	0.03252	0.96748	0.00271	0.02981	0.005405	0.062926	0.034165	8.81878	5.53333	1	0	0	0	0	0	0	0	0	0	0	0	0	0	0	0	0	0	0	0	0	0	0	0	0	0	0	0	0	0
23115057|F|0-20:G>C-20:G>C	TGCAGGACAGCCTGGGTGTGGGCTCTGAGCAGCTTCAGTGGGGGGTAAAGGCATGAGCGGTTCAGCAGG	TGCAGGACAGCCTGGGTGTGGGCTCTGAGCAGCTTCAGTGGGGGGTAAAGGCATG	KN288433.1_scaffold-15184	23668	1	7.54E-21	20:G>C	20	1	1	0.002674	0.997326	0	0.002674	0	0.005333	0.002667	10.85288	3	1	0	0	0	0	0	0	0	0	0	0	0	0	0	0	0	0	0	0	0	0	0	0	0	0	0	0	0	0	0
23115085|F|0-52:A>G-52:A>G	TGCAGGACCCCCACCTGGTCCCACGTGTACTGATTGGGCTCTAGCACCTGGCACTGTCTCCACCCAATC	TGCAGGACCCCCACCTGGTCCCACGTGTACTGATTGGGCTCTAGCACCTGGCACTGTCTCCACCCAATC	KN279563.1_scaffold-2522	9477	1	1.84E-28	52:A>G	52	0.949198	0.985915	0.067606	0.932394	0.014085	0.053521	0.027772	0.12607	0.076921	5.58314	3.14286	1	0	0	0	0	0	0	1	0	2	0	0	0	0	0	-	0	0	0	0	2	0	0	0	0	0	-	-	-	0
23115096|F|0-7:C>T-7:C>T	TGCAGGACGCACTGCTGCCCCATTTGATGTTAATCAACAGATCTAGCATGAGCGGTTCAGCAGGAATGC	TGCAGGACGCACTGCTGCCCCATTTGATGTTAATCAACAGATCTAGCATG	KN287477.1_scaffold-13805	11390	1	3.91E-18	7:C>T	7	0.967914	1	0.038674	0.961326	0	0.038674	0	0.074357	0.037178	9.67841	6.06667	1	0	0	0	0	0	0	0	0	0	2	0	0	0	0	0	0	0	0	0	0	0	0	0	0	0	0	0	0	0
23115097|F|0-36:C>T-36:C>T	TGCAGGACGCTGCTCTCCATGCTGCCTGGATGTATTCCTGGCCACGTGCATGAGCGGTTCAGCAGGAAT	TGCAGGACGCTGCTCTCCATGCTGCCTGGATGTATTCCTGGCCACGTGCATG	KN290323.1_scaffold-17940	138345	1	3.14E-19	36:C>T	36	0.997326	1	0.002681	0.997319	0	0.002681	0	0.005348	0.002674	13.20043	4	1	0	0	0	0	0	0	0	0	0	0	0	0	0	0	0	0	0	0	0	0	0	0	0	0	0	0	0	0	0
23115104|F|0-29:C>T-29:C>T	TGCAGGACTCTGCTTTCCATGCTGCCTGGCTGCATTCCTATCCATATGCATGAGCGGTTCAGCAGGAAT	TGCAGGACTCTGCTTTCCATGCTGCCTGGCTGCATTCCTATCCATATGCATG	KN282925.1_scaffold-7264	44939	1	3.14E-19	29:C>T	29	0.997326	0.989276	0.168901	0.831099	0.010724	0.158177	0.021218	0.280747	0.150982	13.33333	7.13514	1	0	0	0	0	0	0	0	0	0	2	0	0	0	0	0	0	0	0	0	0	0	2	0	0	0	0	0	0	0
23111009|F|0-28:C>T-28:C>T	TGCAGGACTGCATACTGCACATGTGTGCCTGTCTGGACACATCCAAAGGGTGCGTCCAGATGAGCATGA	TGCAGGACTGCATACTGCACATGTGTGCCTGTCTGGACACATCCAAAGGGTGCGTCCAGATGAGCATGA	KN284259.1_scaffold-9175	2807	1	3.08E-26	28:C>T	28	0.997326	0.957105	0.380697	0.619303	0.042895	0.337802	0.082111	0.471534	0.276822	9.87333	6.38372	1	0	1	0	0	0	0	0	0	0	0	2	0	1	0	2	2	1	1	2	2	0	2	2	0	0	0	0	0	2
23115107|F|0-23:C>T-23:C>T	TGCAGGACTGCCCTCTTCCCACTCCCTCCCAGCATGAGCGGTTCAGCAGGAATGCCGAGACCGATCTCG	TGCAGGACTGCCCTCTTCCCACTCCCTCCCAGCATG	KN278521.1_scaffold-1036	85186	1	1.04E-10	23:C>T	23	0.786096	0.979592	0.054422	0.945578	0.020408	0.034014	0.039983	0.10292	0.071452	7.40571	5.2381	1	0	0	0	-	0	0	0	0	0	0	0	-	0	0	-	0	0	0	0	-	0	0	0	0	0	0	0	-	-
23115111|F|0-47:A>G-47:A>G	TGCAGGACTGTGTAAGGGTGCAGAGTAGGGTGTGCTGAGGCGGGCCTAAAGGGCTGCACAGGAGCATGA	TGCAGGACTGTGTAAGGGTGCAGAGTAGGGTGTGCTGAGGCGGGCCTAAAGGGCTGCACAGGAGCATGA	KN282969.1_scaffold-7338	45528	1	3.08E-26	47:A>G	47	1	0.874332	0.540107	0.459893	0.125668	0.414439	0.219752	0.496783	0.358267	7.78125	6.912	1	1	2	1	0	1	1	2	2	2	2	1	2	1	2	2	2	0	0	0	2	0	1	0	2	2	0	2	2	1
23115115|F|0-25:A>G-25:A>G	TGCAGGACTTGGTCCTCGGGCCCGCACTGTTCAACATCTTCATCAGTGCTTGGACAAAGGGGTAAAATG	TGCAGGACTTGGTCCTCGGGCCCGCACTGTTCAACATCTTCATCAGTGCTTGGACAAAGGGGTAAAATG	KN286854.1_scaffold-12920	44381	12	1.84E-28	25:A>G	25	0.957219	1	0.005587	0.994413	0	0.005587	0	0.011111	0.005555	3.43379	3	1	0	0	0	0	-	0	0	0	0	0	0	0	0	0	0	0	0	0	0	0	0	0	0	0	0	0	0	0	0
23115123|F|0-56:A>G-56:A>G	TGCAGGAGACAGGCACAAGGGAACTAAATGTTGAGAGCACAGACAGCAGGGATCAAACTGCATGAGCGG	TGCAGGAGACAGGCACAAGGGAACTAAATGTTGAGAGCACAGACAGCAGGGATCAAACTGCATG	KN282745.1_scaffold-7001	28314	1	9.81E-26	56:A>G	56	0.986631	0.98916	0.186992	0.813008	0.01084	0.176152	0.021445	0.304052	0.162749	7.64551	4.57831	1	2	1	0	0	0	0	2	0	0	1	0	2	2	0	2	0	0	0	0	0	2	0	0	2	0	0	2	0	0
23115125|F|0-58:G>A-58:G>A	TGCAGGAGACCCTGAGGGGGCTCCTGGGTGGATCAGAAAGTGGACCGGAAGTGCTTCTGGTCCAGTGCT	TGCAGGAGACCCTGAGGGGGCTCCTGGGTGGATCAGAAAGTGGACCGGAAGTGCTTCTGGTCCAGTGCT	KN278221.1_scaffold-606	34593	1	1.84E-28	58:G>A	58	1	0.991979	0.050802	0.949198	0.008021	0.042781	0.015914	0.096443	0.056178	8.76395	5.54545	1	0	0	0	0	0	0	0	0	0	0	0	0	0	0	0	0	0	0	0	0	0	0	0	0	2	0	0	0	0
23115129|F|0-16:C>G-16:C>G	TGCAGGAGAGAAACAACCAGGAGGCTGTTCAGCAGCATGAGCGGTTCAGCAGGAATGCCGAGACCGATC	TGCAGGAGAGAAACAACCAGGAGGCTGTTCAGCAGCATG	KN286713.1_scaffold-12714	89746	1	2.85E-12	16:C>G	16	0.997326	0.991957	0.088472	0.911528	0.008043	0.080429	0.015956	0.161289	0.088623	12.12743	5.81818	1	0	0	0	0	0	0	2	0	0	0	2	2	2	0	0	0	2	2	0	2	0	0	0	0	0	0	0	0	0
23115130|F|0-7:G>A-7:G>A	TGCAGGAGAGAATGACAAAAGGCAGAAAGGGGTGCGGGTGCATGAGCGGTTCAGCAGGAATGCCGAGAC	TGCAGGAGAGAATGACAAAAGGCAGAAAGGGGTGCGGGTGCATG	KN284720.1_scaffold-9840	234359	1	6.43E-15	7:G>A	7	0.994652	1	0.002688	0.997312	0	0.002688	0	0.005362	0.002681	10.17167	3	1	0	0	0	0	0	0	0	0	0	0	0	0	0	0	0	0	0	0	0	0	0	0	0	0	0	0	0	0	0
23115133|F|0-67:C>A-67:C>A	TGCAGGAGAGCTACACCATCCTAAAGAGAGGGGCAGAATCTCAGAGCCTCTTCGCTCCATGCCCCCACC	TGCAGGAGAGCTACACCATCCTAAAGAGAGGGGCAGAATCTCAGAGCCTCTTCGCTCCATGCCCCCACC	KN280831.1_scaffold-4283	194602	1	1.84E-28	67:C>A	67	0.991979	0.989218	0.051213	0.948787	0.010782	0.040431	0.021331	0.09718	0.059256	6.43107	3.91667	1	0	0	0	0	0	0	0	0	0	0	0	0	0	0	0	0	0	0	0	0	0	0	0	0	0	0	0	0	0
23115137|F|0-25:G>C-25:G>C	TGCAGGAGATACCAGCACGCAGCAAGAATGCTTATTTTGTCCATGCTGCTCCTTGCCAGCATGAGCGGT	TGCAGGAGATACCAGCACGCAGCAAGAATGCTTATTTTGTCCATGCTGCTCCTTGCCAGCATG	KN277831.1_scaffold-73	653702	1	3.43E-25	25:G>C	25	1	0.941176	0.315508	0.684492	0.058824	0.256684	0.110727	0.431925	0.271326	7.7631	5.55705	1	0	2	2	2	2	0	0	2	2	0	2	2	0	0	1	0	2	2	0	0	0	2	0	0	0	0	0	0	2
23115142|F|0-38:T>C-38:T>C	TGCAGGAGCAAAGGAAATGAGTCAGAGGAGCCAACGCTTGCAGCCAAACTCTCTGCTCAGATGGGCATG	TGCAGGAGCAAAGGAAATGAGTCAGAGGAGCCAACGCTTGCAGCCAAACTCTCTGCTCAGATGGGCATG	KN284273.1_scaffold-9197	930108	1	8.58E-27	38:T>C	38	0.917112	0.002915	1	0	0.997085	0.002915	0.005814	0	0.002907	7	5.11922	1	1	1	1	-	1	1	1	1	1	1	1	1	1	1	-	1	1	1	1	1	1	1	1	1	1	1	-	1	-
23115143|F|0-7:A>G-7:A>G	TGCAGGAACACAAGAGCCACTTGCTATGGGGCCAGGTGGGGCTGGCCCCACACGCTGCCACCACATGCA	TGCAGGAACACAAGAGCCACTTGCTATGGGGCCAGGTGGGGCTGGCCCCACACGCTGCCACCACATGCA	KN278674.1_scaffold-1261	58078	1	8.58E-27	7:A>G	7	0.965241	0.00554	1	0	0.99446	0.00554	0.011019	0	0.005509	4	5.00228	1	1	1	1	1	1	1	1	1	1	1	1	1	1	1	1	1	1	1	1	1	1	1	1	1	1	1	1	1	1
23115144|F|0-40:G>A-40:G>A	TGCAGGAGCACAGCCCTCCCTGGAGGCACCTGAGGCTTAGGCTGTTCCCCATGCATGAGCGGTTCAGCA	TGCAGGAGCACAGCCCTCCCTGGAGGCACCTGAGGCTTAGGCTGTTCCCCATGCATG	KN285990.1_scaffold-11658	61419	1	6.23E-22	40:G>A	40	0.991979	1	0.008086	0.991914	0	0.008086	0	0.016042	0.008021	9.78355	3	1	0	0	0	0	0	0	0	0	0	0	0	0	0	0	0	0	0	0	0	0	0	0	0	0	0	0	0	0	0
23115145|F|0-26:C>T-26:C>T	TGCAGGAGCACAGGAGCTGCATACTGCGGGGCTGGGTTGGGCTGGCCCTGCATGAGCGGTTCAGCAGGA	TGCAGGAGCACAGGAGCTGCATACTGCGGGGCTGGGTTGGGCTGGCCCTGCATG	KN293280.1_scaffold-22328	57966	1	2.62E-20	26:C>T	26	0.959893	1	0.002786	0.997214	0	0.002786	0	0.005556	0.002778	7.18535	3	1	0	0	0	0	0	0	0	0	0	0	0	-	0	0	0	0	0	0	0	0	0	0	0	0	0	0	0	0	0
23115150|F|0-46:G>C-46:G>C	TGCAGGAGCAGAGGGGTGGGGCCAACCCTGCTCTCTGGAGCAGACAGTACAGCCCAGCCCAGCCCAGGG	TGCAGGAGCAGAGGGGTGGGGCCAACCCTGCTCTCTGGAGCAGACAGTACAGCCCAGCCCAGCCCAGGG	KN285467.1_scaffold-10904	2911	10	1.84E-28	46:G>C	46	1	0.994652	0.040107	0.959893	0.005348	0.034759	0.010638	0.076997	0.043817	9.11991	4.83333	1	0	0	0	0	0	0	0	0	0	0	0	0	0	0	0	0	0	0	0	0	0	0	0	0	0	0	0	0	0
23115151|F|0-22:G>C-22:G>C	TGCAGGAGCAGCAGCAGGTCCTGGCCAAGCCATTCCCAGGCATGAGCGGTTCAGCAGGAATGCCGAGAC	TGCAGGAGCAGCAGCAGGTCCTGGCCAAGCCATTCCCAGGCATG	KN278240.1_scaffold-632	27402	1	6.43E-15	22:G>C	22	0.967914	1	0.002762	0.997238	0	0.002762	0	0.00551	0.002755	9.12417	3	1	0	0	0	0	0	0	0	0	0	0	0	0	0	0	0	0	0	0	0	0	0	0	0	0	0	0	0	0	0
23115155|F|0-7:G>A-7:G>A	TGCAGGAGCAGTTCTGCCCTTTAGCTCACTTCCACCCTTGCAACCCAGCATGAGCGGTTCAGCAGGAAT	TGCAGGAGCAGTTCTGCCCTTTAGCTCACTTCCACCCTTGCAACCCAGCATG	KN286069.1_scaffold-11765	144989	1	3.14E-19	7:G>A	7	0.991979	1	0.002695	0.997305	0	0.002695	0	0.005376	0.002688	10.24138	3	1	0	0	0	0	0	0	0	0	0	0	0	0	0	0	0	0	0	0	0	0	0	0	0	0	0	0	0	0	0
23115163|F|0-34:T>C-34:T>C	TGCAGGAGCCCACTTTCCCACGGCTGGTCACACATGATGCTCTGTGGGCTGCTGATGGGTGGCATGAGC	TGCAGGAGCCCACTTTCCCACGGCTGGTCACACATGATGCTCTGTGGGCTGCTGATGGGTGGCATGAGC	KN279593.1_scaffold-2565	88972	1	8.58E-27	34:T>C	34	0.983957	1	0.021739	0.978261	0	0.021739	0	0.042533	0.021267	7.15789	4	1	0	0	0	0	0	0	0	0	0	0	0	0	0	0	0	0	0	0	0	0	0	0	0	0	0	0	0	0	0
23115178|F|0-43:G>A-43:G>A	TGCAGGAGCTCCAGCGAGGGAGCAGAGGGGAGGGGCCAGCCCTGTTGTAGAGCAGAGAGCCCCACCCAG	TGCAGGAGCTCCAGCGAGGGAGCAGAGGGGAGGGGCCAGCCCTGTTGTAGAGCAGAGAGCCCCACCCAG	KN289786.1_scaffold-17161	223291	10	1.84E-28	43:G>A	43	0.991979	0.994609	0.037736	0.962264	0.005391	0.032345	0.010724	0.072624	0.041674	6.88503	3.25	1	0	0	0	0	0	0	0	0	0	0	0	0	0	0	0	0	0	0	0	0	0	0	0	0	0	0	0	2	0
23115185|F|0-61:A>C-61:A>C	TGCAGGAGCTCCCTGCTCGCTCCTGCCATGCCCCTGCTGCCAGAACCGCCACCTGTGGATGATCGCCAT	TGCAGGAGCTCCCTGCTCGCTCCTGCCATGCCCCTGCTGCCAGAACCGCCACCTGTGGATGATCGCCAT	KN289245.1_scaffold-16338	28374	1	8.58E-27	61:A>C	61	0.97861	0.013661	1	0	0.986339	0.013661	0.026949	0	0.013475	3.16667	3.60089	1	1	1	1	1	-	1	1	1	1	1	1	1	1	1	1	1	1	1	1	1	1	1	1	1	1	1	1	1	1
23115191|F|0-26:C>A-26:C>A	TGCAGGAGCTCCTTGCTTACCACTGCCACCACACTCCCACCACCATCAGCACCACCGTGCCCTACCAGC	TGCAGGAGCTCCTTGCTTACCACTGCCACCACACTCCCACCACCATCAGCACCACCGTGCCCTACCAGC	KN289654.1_scaffold-16959	32724	5	1.84E-28	26:C>A	26	1	0.991979	0.112299	0.887701	0.008021	0.104278	0.015914	0.199377	0.107645	7.4086	4.24	1	0	2	0	0	0	0	0	0	0	0	0	0	0	0	0	0	0	0	2	0	0	0	0	0	0	0	0	0	0
23115195|F|0-46:C>G-46:C>G	TGCAGGAGCTGCTCTCCACCACTGCCTGGGGAAGTATTCCTGACCACGTGCACGTGTATGCATGAGCGG	TGCAGGAGCTGCTCTCCACCACTGCCTGGGGAAGTATTCCTGACCACGTGCACGTGTATGCATG	KN277984.1_scaffold-282	50892	3	9.81E-26	46:C>G	46	1	0.997326	0.045455	0.954545	0.002674	0.042781	0.005333	0.086777	0.046055	12.53092	6	1	0	0	0	0	0	0	0	0	0	0	0	0	0	0	0	0	0	0	0	0	0	0	0	0	0	0	0	0	0
23115208|F|0-21:G>A-21:G>A	TGCAGGAGCTTGGCTGCATGGGGCCTGCCAGCACTGAGGTAAAGGCATGAGCGGTTCAGCAGGAATGCC	TGCAGGAGCTTGGCTGCATGGGGCCTGCCAGCACTGAGGTAAAGGCATG	KN292771.1_scaffold-21553	35667	1	1.35E-17	21:G>A	21	0.975936	1	0.00274	0.99726	0	0.00274	0	0.005464	0.002732	9.06208	3	1	0	0	0	0	0	0	0	0	0	0	0	0	0	0	0	0	0	0	0	0	0	0	0	0	0	0	0	0	0
23115210|F|0-40:G>A-40:G>A	TGCAGGAGGAAATGGGGGTGGGGAGGGGTACTGATATATTGGTGCCATATCAGGACACCATGTGCAGGC	TGCAGGAGGAAATGGGGGTGGGGAGGGGTACTGATATATTGGTGCCATATCAGGACACCATGTGCAGGC	KN283033.1_scaffold-7434	168643	1	1.84E-28	40:G>A	40	1	1	0.002674	0.997326	0	0.002674	0	0.005333	0.002667	8.41064	3	1	0	0	0	0	0	0	0	0	0	0	0	0	0	0	0	0	0	0	0	0	0	0	0	0	0	0	0	0	0
23115213|F|0-7:G>A-7:G>A	TGCAGGAGGACAAGTGCCAAAATGGTTTCACTACAGCAATTCCATGCTTCACACGTGACAGTGAGAATG	TGCAGGAGGACAAGTGCCAAAATGGTTTCACTACAGCAATTCCATGCTTCACACGTGACAGTGAGAATG	KN280409.1_scaffold-3712	158816	1	1.84E-28	7:G>A	7	0.989305	0.986486	0.1	0.9	0.013514	0.086486	0.026662	0.18	0.103331	7.3878	4.45652	1	0	0	0	0	0	0	0	0	2	0	0	0	0	0	0	0	0	0	0	0	0	0	0	0	0	0	0	0	0
23115218|F|0-16:C>T-16:C>T	TGCAGGAGGAGCCTAGCATATTGATCCTGGGCTCCCCCCTCACCAGCATTTTGACAGCTGGGTGCCCAC	TGCAGGAGGAGCCTAGCATATTGATCCTGGGCTCCCCCCTCACCAGCATTTTGACAGCTGGGTGCCCAC	KN282477.1_scaffold-6606	258284	1	1.84E-28	16:C>T	16	0.997326	1	0.008043	0.991957	0	0.008043	0	0.015956	0.007978	5.76129	5	1	0	0	0	0	0	0	0	0	0	0	0	0	0	0	0	0	0	0	0	0	0	0	0	0	0	0	0	0	0
23115231|F|0-22:T>G-22:T>G	TGCAGGAGGCCGTTGGTGGCCGTGCGGTAGCAGCTGCCCTGGGGCACGATGGAGACCAAGGTGCGGTCC	TGCAGGAGGCCGTTGGTGGCCGTGCGGTAGCAGCTGCCCTGGGGCACGATGGAGACCAAGGTGCGGTCC	KN291574.1_scaffold-19786	23611	1	1.84E-28	22:T>G	22	0.997326	1	0.002681	0.997319	0	0.002681	0	0.005348	0.002674	11.49247	3	1	0	0	0	0	0	0	0	0	0	0	0	0	0	0	0	0	0	0	0	0	0	0	0	0	0	0	0	0	0
23111273|F|0-5:G>A-5:G>A	TGCAGGAGGCTGGGCACTGGGTCATGGAACAGAGTGGGAATTTGGTGGGTGGAAGGTAGCTGGAATGCA	TGCAGGAGGCTGGGCACTGGGTCATGGAACAGAGTGGGAATTTGGTGGGTGGAAGGTAGCTGGAATGCA	KN291728.1_scaffold-20009	427104	1	1.84E-28	5:G>A	5	0.983957	0.994565	0.065217	0.934783	0.005435	0.059783	0.01081	0.121928	0.066369	8.22368	5.24	1	0	0	0	0	0	0	0	0	0	0	0	2	2	0	2	0	0	0	0	0	0	0	0	0	0	2	0	0	0
23115246|F|0-29:A>C-29:A>C	TGCAGGAGGGGGCTGCCTGGGTGCTAGGTACCAGGAGCTGGCTGTGGGTGAGGGGAGGGAGGGCGGAGT	TGCAGGAGGGGGCTGCCTGGGTGCTAGGTACCAGGAGCTGGCTGTGGGTGAGGGGAGGGAGGGCGGAGT	KN284137.1_scaffold-8990	679984	1	1.84E-28	29:A>C	29	1	0.986631	0.176471	0.823529	0.013369	0.163102	0.026381	0.290657	0.158519	7.76623	4.8481	1	0	0	0	0	2	0	2	0	0	0	0	2	2	0	0	0	0	0	2	0	2	0	2	0	0	0	0	2	2
23115248|F|0-26:C>T-26:C>T	TGCAGGAGGTCATTCAGCCCTGCCTGCCCAGGCACAGGGGGCAGCCCTGGCCATGGTGCATGAGCGGTT	TGCAGGAGGTCATTCAGCCCTGCCTGCCCAGGCACAGGGGGCAGCCCTGGCCATGGTGCATG	KN287315.1_scaffold-13569	49146	1	1.20E-24	26:C>T	26	1	0.994652	0.042781	0.957219	0.005348	0.037433	0.010638	0.081901	0.04627	9.55983	6.17647	1	0	0	0	0	0	0	0	0	0	0	0	0	0	0	0	0	0	0	0	0	0	0	0	0	0	0	0	0	0
23115251|F|0-23:C>A-23:C>A	TGCAGGAGGTGTCCTCCAGCTTCCATTGCATAGGCTTTCCCATCTATGTGGGGCCCATGGATGGCATGA	TGCAGGAGGTGTCCTCCAGCTTCCATTGCATAGGCTTTCCCATCTATGTGGGGCCCATGGATGGCATGA	KN277813.1_scaffold-49	24750	1	6.63E-28	23:C>A	23	0.997326	1	0.002681	0.997319	0	0.002681	0	0.005348	0.002674	10.42644	3	1	0	0	0	0	0	0	0	0	0	0	0	0	0	0	0	0	0	0	0	0	0	0	0	0	0	0	0	0	0
23115253|F|0-25:G>A-25:G>A	TGCAGGAGTACTGTGGTGGCAGTGGGTGAAGGGAGCATTTGGAGTTCAGAGATAAAAAGGCACAAGGAC	TGCAGGAGTACTGTGGTGGCAGTGGGTGAAGGGAGCATTTGGAGTTCAGAGATAAAAAGGCACAAGGAC	KN282493.1_scaffold-6627	25181	4	1.84E-28	25:G>A	25	0.997326	0.997319	0.0563	0.9437	0.002681	0.053619	0.005348	0.106261	0.055804	7.83761	3.36	1	0	0	0	0	0	0	0	2	0	0	0	0	2	0	0	0	0	0	0	0	0	0	0	0	0	0	0	0	0
23115273|F|0-52:G>A-52:G>A	TGCAGGAGTTTCCAATATGCATCTGGTAACATGAAGAAATTGCATGTCAGTCGTTTGCAGAACTGAGGA	TGCAGGAGTTTCCAATATGCATCTGGTAACATGAAGAAATTGCATGTCAGTCGTTTGCAGAACTGAGGA	KN282800.1_scaffold-7089	74737	1	1.84E-28	52:G>A	52	0.997326	0.951743	0.292225	0.707775	0.048257	0.243968	0.091857	0.413659	0.252758	7.75847	4.85401	1	0	0	0	0	0	0	0	2	0	0	0	0	0	2	0	2	2	2	0	0	0	0	0	0	0	0	0	0	0
23115283|F|0-20:C>G-20:C>G	TGCAGGATAGCTGCACCAGCCTGCCTTCACCCCAGTGCTATGCGGCTGTCAAGCCCACACAGTTCAGGC	TGCAGGATAGCTGCACCAGCCTGCCTTCACCCCAGTGCTATGCGGCTGTCAAGCCCACACAGTTCAGGC	KN287771.1_scaffold-14234	24430	1	1.84E-28	20:C>G	20	1	1	0.002674	0.997326	0	0.002674	0	0.005333	0.002667	9.47761	3	1	0	0	0	0	0	0	0	0	0	0	0	0	0	0	0	0	0	0	0	0	0	0	0	0	0	0	0	0	0
23115287|F|0-15:T>A-15:T>A	TGCAGGATATTCCCATCTACAGCACTCCCCTTCTTCAGAGCTGTATTTTGCATGAGCGGTTCAGCAGGA	TGCAGGATATTCCCATCTACAGCACTCCCCTTCTTCAGAGCTGTATTTTGCATG	KN280437.1_scaffold-3754	89334	1	2.62E-20	15:T>A	15	0.991979	0.981132	0.107817	0.892183	0.018868	0.088949	0.037024	0.192385	0.114704	11.53611	7	1	0	0	0	0	0	0	0	0	0	0	0	0	2	0	0	0	2	2	0	0	0	0	0	0	0	0	0	0	0
23115289|F|0-51:T>C-51:T>C	TGCAGGATATTTCTGTAAACTATGTCACACTTTTGAAAGTACTTTTGAAAATGAACACTAGCATGAGCG	TGCAGGATATTTCTGTAAACTATGTCACACTTTTGAAAGTACTTTTGAAAATGAACACTAGCATG	KN282787.1_scaffold-7071	229199	1	2.80E-26	51:T>C	51	0.962567	0.972222	0.255556	0.744444	0.027778	0.227778	0.054012	0.380494	0.217253	7.73288	5.93443	1	0	0	1	2	0	0	0	0	1	0	0	0	1	2	0	0	1	2	2	2	0	0	0	-	0	0	0	0	2
23115298|F|0-54:C>T-54:C>T	TGCAGGATCCGTGCGTGCCTACCTCGTGGCGAAGGAGCAGCAACCCAGCGATGCCGGCACTGGAGGGGC	TGCAGGATCCGTGCGTGCCTACCTCGTGGCGAAGGAGCAGCAACCCAGCGATGCCGGCACTGGAGGGGC	KN291033.1_scaffold-19006	52457	1	1.84E-28	54:C>T	54	1	0.941176	0.334225	0.665775	0.058824	0.275401	0.110727	0.445037	0.277882	8.53047	8.16774	1	0	0	0	2	0	0	0	0	0	0	0	0	0	2	0	0	0	0	2	0	0	0	0	0	0	0	0	2	0
23115305|F|0-34:G>A-34:G>A	TGCAGGATCTTCAGAGATGACTTCCAGCAAGTGCGCTCAATTAGCACATTCATTCTTACAACTGAATTT	TGCAGGATCTTCAGAGATGACTTCCAGCAAGTGCGCTCAATTAGCACATTCATTCTTACAACTGAATTT	KN278156.1_scaffold-517	303996	1	1.84E-28	34:G>A	34	0.986631	0.99458	0.070461	0.929539	0.00542	0.065041	0.010781	0.130992	0.070887	6.6269	3	1	0	0	0	0	0	0	0	0	0	0	0	0	0	0	0	0	0	0	0	0	0	0	2	0	0	0	0	0	0
23115306|F|0-35:A>G-35:A>G	TGCAGGATGAAAAATCAGCAGTTCAAAGTCATGCCACTGCCTTTTTGCCCCAGTGCATGAGCGGTTCAG	TGCAGGATGAAAAATCAGCAGTTCAAAGTCATGCCACTGCCTTTTTGCCCCAGTGCATG	KN280381.1_scaffold-3671	154013	1	5.12E-23	35:A>G	35	0.983957	1	0.002717	0.997283	0	0.002717	0	0.00542	0.00271	7.1	3	1	0	0	0	0	0	0	0	0	0	0	0	0	0	0	0	0	0	0	0	0	0	0	0	0	0	0	0	0	0
23115309|F|0-14:C>T-14:C>T	TGCAGGATGAGGTGCTCGCAGGGGTCTGCAAGTGCCCCAGGGTGAATGTCTGCATGAGCGGTTCAGCAG	TGCAGGATGAGGTGCTCGCAGGGGTCTGCAAGTGCCCCAGGGTGAATGTCTGCATG	KN285941.1_scaffold-11579	25946	1	2.17E-21	14:C>T	14	1	0.930481	0.23262	0.76738	0.069519	0.163102	0.129372	0.357016	0.243194	10.95413	7.05505	1	2	0	0	0	0	0	0	0	0	0	0	0	0	0	0	0	2	2	0	0	2	2	0	0	0	0	0	0	0
23115311|F|0-30:C>T-30:C>T	TGCAGGATGCAAGCGCCAGGCCCGAGCACACCCAGGTCACCTGCCGCATGAGCGGTTCAGCAGGAATGC	TGCAGGATGCAAGCGCCAGGCCCGAGCACACCCAGGTCACCTGCCGCATG	JRXG01042977.1_scaffold-8312_1	2185	1	3.91E-18	30:C>T	30	0.893048	1	0.002994	0.997006	0	0.002994	0	0.00597	0.002985	5.74201	3	1	0	-	0	0	0	0	0	0	0	0	0	0	0	0	-	0	0	0	0	0	0	0	0	0	-	0	0	-	0
23115327|F|0-7:T>G-7:T>G	TGCAGGATGGTTCACTAATAATCAACATTTTCTCTACCTTCAAGAAATTGTGCATGAGCGGTTCAGCAG	TGCAGGATGGTTCACTAATAATCAACATTTTCTCTACCTTCAAGAAATTGTGCATG	KN281986.1_scaffold-5928	220312	1	2.17E-21	7:T>G	7	0.957219	1	0.002793	0.997207	0	0.002793	0	0.005571	0.002785	8.67937	3	1	0	0	0	0	0	0	-	0	0	0	0	0	0	0	0	0	0	0	0	0	0	0	-	-	0	0	0	0	0
23115333|F|0-14:A>G-14:A>G	TGCAGGATTAAATCAGCAAAACTGAAGAAAAGAAACACAGGAGAGCTATGCAAAAGCCATTTCTAGTGC	TGCAGGATTAAATCAGCAAAACTGAAGAAAAGAAACACAGGAGAGCTATGCAAAAGCCATTTCTAGTGC	KN283431.1_scaffold-7985	48551	1	1.84E-28	14:A>G	14	0.981283	0.989101	0.108992	0.891008	0.010899	0.098093	0.021561	0.194225	0.107893	7.32819	4.34615	1	0	0	0	0	0	0	0	0	0	0	0	0	0	0	0	0	0	0	0	0	2	0	0	2	0	0	0	0	0
23115334|F|0-7:T>G-7:T>G	TGCAGGATTACAGGAGCAGGGCTGCCTTCTGAAGCATGAGCGGTTCAGCAGGAATGCCGAGACCGATCT	TGCAGGATTACAGGAGCAGGGCTGCCTTCTGAAGCATG	KN284699.1_scaffold-9809	293139	1	9.53E-12	7:T>G	7	0.975936	1	0.00274	0.99726	0	0.00274	0	0.005464	0.002732	10.56828	3	1	0	0	0	0	0	0	0	0	0	0	0	2	0	0	0	0	0	0	0	0	0	0	0	0	0	0	0	0	0
23115353|F|0-20:G>C-20:G>C	TGCAGGCAAAGCCCTACGAGGAGAGATTGAAGGCCTTGGAACTCTTCAGCCTCCGCAAGCATTGATGAT	TGCAGGCAAAGCCCTACGAGGAGAGATTGAAGGCCTTGGAACTCTTCAGCCTCCGCAAGCATTGATGAT	KN281439.1_scaffold-5169	105040	9	1.84E-28	20:G>C	20	1	1	0.002674	0.997326	0	0.002674	0	0.005333	0.002667	10.36596	3	1	0	0	0	0	0	0	0	0	0	0	0	0	0	0	0	0	0	0	0	0	0	0	0	0	0	0	0	0	0
23115354|F|0-17:G>A-17:G>A	TGCAGGCAAAGGGAGCAGAACAGCATACTGCCCTAGGCCCTGGACCTGCATGAGCGGTTCAGCAGGAAT	TGCAGGCAAAGGGAGCAGAACAGCATACTGCCCTAGGCCCTGGACCTGCATG	KN283349.1_scaffold-7879	63386	1	3.14E-19	17:G>A	17	0.994652	1	0.002688	0.997312	0	0.002688	0	0.005362	0.002681	7.00641	4	1	0	0	0	0	0	0	0	0	0	0	0	0	0	0	0	0	0	0	0	0	0	0	0	0	0	0	0	0	0
23115355|F|0-15:C>A-15:C>A	TGCAGGCAAATACAACCAGCCTTAACCCCACCTACTATACAAACTGAAAACTGAACTTACGGTATCAGT	TGCAGGCAAATACAACCAGCCTTAACCCCACCTACTATACAAACTGAAAACTGAACTTACGGTATCAGT	KN279303.1_scaffold-2141	800350	1	1.84E-28	15:C>A	15	0.997326	1	0.024129	0.975871	0	0.024129	0	0.047093	0.023546	9.5957	6	1	0	0	0	0	0	0	0	0	0	0	0	0	0	0	0	0	0	0	0	0	0	0	0	0	0	0	0	0	0
23115356|F|0-23:T>G-23:T>G	TGCAGGCAAATGAATAGGTAGAATAGAAATAGAAAAGGTAAAGTGGCATGAGCGGTTCAGCAGGAATGC	TGCAGGCAAATGAATAGGTAGAATAGAAATAGAAAAGGTAAAGTGGCATG	KN287005.1_scaffold-13142	54290	1	3.91E-18	23:T>G	23	0.973262	1	0.002747	0.997253	0	0.002747	0	0.005479	0.00274	7.31498	3	1	0	0	0	0	0	0	0	0	0	0	0	0	0	0	0	0	0	0	0	0	0	0	-	0	0	0	0	0	0
23115358|F|0-23:C>G-23:C>G	TGCAGGCAACAATAGTATTTATCCTGACACTAGTATTCTACTTTCAATTTGTGTGCATGAGCGGTTCAG	TGCAGGCAACAATAGTATTTATCCTGACACTAGTATTCTACTTTCAATTTGTGTGCATG	KN288118.1_scaffold-14731	24967	1	5.12E-23	23:C>G	23	0.975936	1	0.00274	0.99726	0	0.00274	0	0.005464	0.002732	10.27074	3	1	2	0	0	0	0	0	0	0	0	0	0	0	0	0	0	0	0	0	0	0	0	0	0	0	0	0	0	0	0
23115361|F|0-58:C>A-58:C>A	TGCAGGCAACAGAAGCAACCTCCATCTCACATCCCAGGCACAGAAAGACGTGGTGGGGCTCACATAGCA	TGCAGGCAACAGAAGCAACCTCCATCTCACATCCCAGGCACAGAAAGACGTGGTGGGGCTCACATAGCA	KN288803.1_scaffold-15707	49374	1	1.84E-28	58:C>A	58	0.989305	0.997297	0.051351	0.948649	0.002703	0.048649	0.005391	0.097429	0.05141	12.14039	10.52381	1	0	0	0	0	0	0	0	0	0	0	0	0	0	0	0	0	0	0	0	0	0	0	0	0	2	0	0	0	0
23115367|F|0-62:C>G-62:C>G	TGCAGGCAACGTGACAGAGAGGTCTGAAAGAAGACCTATGGATCCAACTCAGCAGAGCCACTCAGCATG	TGCAGGCAACGTGACAGAGAGGTCTGAAAGAAGACCTATGGATCCAACTCAGCAGAGCCACTCAGCATG	KN293727.1_scaffold-22993	305159	1	1.84E-28	62:C>G	62	0.991979	1	0.02965	0.97035	0	0.02965	0	0.057541	0.02877	8.64163	5.05882	1	0	0	0	0	0	0	0	0	0	0	0	0	0	0	0	0	0	0	0	0	0	0	0	0	0	0	0	0	0
23115371|F|0-50:G>A-50:G>A	TGCAGGCAAGATCAGACCCTGGAGCCTCACAGCACCCCCATCCAGGCAGGGAGGGGGCCACACCCCATC	TGCAGGCAAGATCAGACCCTGGAGCCTCACAGCACCCCCATCCAGGCAGGGAGGGGGCCACACCCCATC	KN286029.1_scaffold-11715	47373	1	1.84E-28	50:G>A	50	1	0.957219	0.248663	0.751337	0.042781	0.205882	0.081901	0.37366	0.22778	7.26116	4.05932	1	0	0	0	0	2	2	0	0	2	0	0	0	0	0	0	0	0	0	0	0	0	0	0	0	0	2	0	0	0
23115372|F|0-36:G>A-36:G>A	TGCAGGCAAGCAGCAGTGGCAGCATGGGGTTGTGGCGGCAGCTGTGTGCTGCCCAGCTGCGGGGAGGGG	TGCAGGCAAGCAGCAGTGGCAGCATGGGGTTGTGGCGGCAGCTGTGTGCTGCCCAGCTGCGGGGAGGGG	KN292142.1_scaffold-20624	202671	1	1.84E-28	36:G>A	36	1	0.959893	0.26738	0.73262	0.040107	0.227273	0.076997	0.391776	0.234386	7.5531	4.86667	1	0	0	0	0	0	2	0	0	0	0	0	0	0	0	0	2	0	0	0	0	0	0	0	0	0	0	0	2	0
23115375|F|0-18:A>G-18:A>G	TGCAGGCAAGTGCTCTAGAGAACAGAGACTCGGAAGCTATTTAAGAGCATGAGCGGTTCAGCAGGAATG	TGCAGGCAAGTGCTCTAGAGAACAGAGACTCGGAAGCTATTTAAGAGCATG	KN281893.1_scaffold-5804	12076	1	1.09E-18	18:A>G	18	0.967914	1	0.016575	0.983425	0	0.016575	0	0.0326	0.0163	11.38717	6.14286	1	0	0	0	0	0	0	0	0	0	0	0	0	0	0	0	0	0	0	0	0	0	0	0	0	0	0	0	0	0
23115388|F|0-19:G>T-19:G>T	TGCAGGCACAGAGGGCAGAGGTGGGAGCTGGCCCTGGGGCCCAGCCCATGGTGACAGGACCCAGCATGA	TGCAGGCACAGAGGGCAGAGGTGGGAGCTGGCCCTGGGGCCCAGCCCATGGTGACAGGACCCAGCATGA	KN285163.1_scaffold-10460	173004	9	6.63E-28	19:G>T	19	1	0.997326	0.026738	0.973262	0.002674	0.024064	0.005333	0.052046	0.02869	12.67094	6.125	1	0	0	0	0	0	0	0	0	0	0	0	0	0	0	0	0	0	0	0	0	0	0	0	0	0	0	0	2	0
23115390|F|0-45:C>T-45:C>T	TGCAGGCACAGCAGGGTCTGCTGGCCTCCCTGTGCCCCCTTCCCCCTTTACCACTTGTTGCTTAAGCAG	TGCAGGCACAGCAGGGTCTGCTGGCCTCCCTGTGCCCCCTTCCCCCTTTACCACTTGTTGCTTAAGCAG	KN287470.1_scaffold-13797	21260	1	1.84E-28	45:C>T	45	0.967914	1	0.013812	0.986188	0	0.013812	0	0.027243	0.013621	4.90949	3.28571	1	0	0	0	0	0	0	0	0	0	0	0	0	0	0	0	0	0	0	0	0	0	0	0	0	0	0	0	0	0
23115391|F|0-58:C>T-58:C>T	TGCAGGCACAGCCTGCAAACCATGTGTGGCGCACACTGGCCTCTCTCTGGGGCTCCCACTGCATGAGCG	TGCAGGCACAGCCTGCAAACCATGTGTGGCGCACACTGGCCTCTCTCTGGGGCTCCCACTGCATG	KN286193.1_scaffold-11956	38291	1	2.80E-26	58:C>T	58	1	0.986631	0.176471	0.823529	0.013369	0.163102	0.026381	0.290657	0.158519	9.23542	7	1	0	0	0	2	0	0	0	0	0	0	0	0	0	0	0	0	0	0	0	0	0	0	0	0	0	0	0	0	0
23115403|F|0-39:G>T-39:G>T	TGCAGGCACCAGTAGCCATCCTCTCAGGCCCACTGTGGGGCTTGGTGTGGGGCTTCAGGTGGCTGAATG	TGCAGGCACCAGTAGCCATCCTCTCAGGCCCACTGTGGGGCTTGGTGTGGGGCTTCAGGTGGCTGAATG	KN284475.1_scaffold-9482	52262	1	1.84E-28	39:G>T	39	1	0.981283	0.141711	0.858289	0.018717	0.122995	0.036733	0.243258	0.139995	8.63834	5.53731	1	0	0	0	0	0	0	0	0	0	0	0	0	0	0	0	2	0	0	0	0	0	0	0	0	0	0	0	0	0
23115411|F|0-44:T>G-44:T>G	TGCAGGCACCTGTCCAACAGAGCAAAGAAGCACATGCTTAACTTTAGGCATGGGAACAGACCCATTTAA	TGCAGGCACCTGTCCAACAGAGCAAAGAAGCACATGCTTAACTTTAGGCATGGGAACAGACCCATTTAA	KN285080.1_scaffold-10341	468689	1	1.84E-28	44:T>G	44	0.97861	0.978142	0.125683	0.874317	0.021858	0.103825	0.04276	0.219774	0.131267	7.37111	4.77193	1	0	0	0	0	0	0	0	0	0	0	0	0	0	0	0	0	0	0	0	0	0	0	0	0	0	0	0	2	0
23115415|F|0-65:A>G-65:A>G	TGCAGGCACGGGACAGAGGTGGGAGCCAGCCCTGGGCCCTGGCCAATGCTGACAGGAGCCGGTGCAGCA	TGCAGGCACGGGACAGAGGTGGGAGCCAGCCCTGGGCCCTGGCCAATGCTGACAGGAGCCGGTGCAGCA	KN290860.1_scaffold-18719	17375	1	1.84E-28	65:A>G	65	1	1	0.016043	0.983957	0	0.016043	0	0.031571	0.015785	9.38593	3.66667	1	0	0	0	0	0	0	0	0	0	2	0	0	2	0	0	0	0	0	0	0	0	0	0	0	0	0	0	0	0
23115417|F|0-45:G>A-45:G>A	TGCAGGCACGTTGCCGGTGTCAGCACCAAGCGCACTTTTCCCTTCGGGGTTGCATTTTTATTTTGAGCA	TGCAGGCACGTTGCCGGTGTCAGCACCAAGCGCACTTTTCCCTTCGGGGTTGCATTTTTATTTTGAGCA	KN281752.1_scaffold-5607	137526	1	1.84E-28	45:G>A	45	1	1	0.042781	0.957219	0	0.042781	0	0.081901	0.040951	11.0383	4.35	1	0	0	0	0	0	0	0	0	0	0	0	0	0	0	0	0	0	0	0	0	0	0	0	0	0	0	0	0	0
23115420|F|0-21:C>T-21:C>T	TGCAGGCACTGACAGGGTTGTCTAGGGCATATGCATGAGCGGTTCAGCAGGAATGCCGAGACCGATCTC	TGCAGGCACTGACAGGGTTGTCTAGGGCATATGCATG	KN282837.1_scaffold-7142	73280	1	3.16E-11	21:C>T	21	1	0.983957	0.179144	0.820856	0.016043	0.163102	0.031571	0.294103	0.162837	11.95455	6.78161	1	0	0	0	0	0	0	0	2	2	2	0	0	2	2	0	2	0	0	1	0	0	0	2	0	0	0	2	0	2
23115421|F|0-13:A>G-13:A>G	TGCAGGCACTGCCAACAGTGTCAGCAGCACCTTTTCGTAGGGGGTGCACCACCATGCTCAGGAGCTGCA	TGCAGGCACTGCCAACAGTGTCAGCAGCACCTTTTCGTAGGGGGTGCACCACCATGCTCAGGAGCTGCA	KN284764.1_scaffold-9904	79824	5	1.84E-28	13:A>G	13	0.997326	1	0.005362	0.994638	0	0.005362	0	0.010666	0.005333	8.60256	4.5	1	0	0	0	0	0	0	0	0	0	0	0	0	0	0	0	0	0	0	0	0	0	0	0	0	0	0	0	0	0
23115428|F|0-35:G>A-35:G>A	TGCAGGCACTGCTGGCAATGGCAGCGGCGGCCATGGAAAATTGTGGACTGCCTGCAAATGCCAGCAGTG	TGCAGGCACTGCTGGCAATGGCAGCGGCGGCCATGGAAAATTGTGGACTGCCTGCAAATGCCAGCAGTG	KN284802.1_scaffold-9965	139270	1	1.84E-28	35:G>A	35	0.997326	0.991957	0.045576	0.954424	0.008043	0.037534	0.015956	0.086998	0.051477	5.69546	4.05	1	0	0	0	0	0	0	0	0	0	0	0	0	0	0	0	0	0	0	0	0	0	0	0	0	0	0	0	1	0
23115453|F|0-12:C>A-12:C>A	TGCAGGCAGATCCTGCCTGGCTAACCTTGTTTCCTTTTACGACCAGGTCACAAAGTCCTTGGATGCATG	TGCAGGCAGATCCTGCCTGGCTAACCTTGTTTCCTTTTACGACCAGGTCACAAAGTCCTTGGATGCATG	KN282495.1_scaffold-6631	107926	10	1.84E-28	12:C>A	12	1	0.997326	0.029412	0.970588	0.002674	0.026738	0.005333	0.057093	0.031213	10.40812	5.78571	1	2	0	0	0	0	0	0	0	0	0	0	0	0	0	0	0	0	0	0	0	0	0	0	0	0	0	0	0	0
23115454|F|0-23:T>G-23:T>G	TGCAGGCAGCACAGAAGGTTGGTTTGGCATGAAGCCCACATGTCAATCTCTGTGCTGTGTGCAGCACTG	TGCAGGCAGCACAGAAGGTTGGTTTGGCATGAAGCCCACATGTCAATCTCTGTGCTGTGTGCAGCACTG	KN285656.1_scaffold-11164	536034	1	1.84E-28	23:T>G	23	0.991979	1	0.002695	0.997305	0	0.002695	0	0.005376	0.002688	7.10515	3	1	0	0	0	0	0	0	0	0	0	0	0	0	0	0	0	0	0	0	0	0	0	0	0	0	0	0	0	0	0
23115459|F|0-62:C>T-62:C>T	TGCAGGCAGCATATGCTGGCCCTTCTCCAGGGCTTGGGCTGCCTGTGGTACATGGGCTTGACCCAGTGC	TGCAGGCAGCATATGCTGGCCCTTCTCCAGGGCTTGGGCTGCCTGTGGTACATGGGCTTGACCCAGTGC	KN290185.1_scaffold-17750	83183	1	1.84E-28	62:C>T	62	1	1	0.002674	0.997326	0	0.002674	0	0.005333	0.002667	6.3383	4	1	0	0	0	0	0	0	0	0	0	0	0	0	0	0	0	0	0	0	0	0	0	0	0	0	0	0	0	0	0
23115468|F|0-52:C>T-52:C>T	TGCAGGCAGCGAGTAGGGCCAGTTTGGCACAAGGCCTGTGCAGTCCGAGACCCACTGGTAGCATGAGCG	TGCAGGCAGCGAGTAGGGCCAGTTTGGCACAAGGCCTGTGCAGTCCGAGACCCACTGGTAGCATG	KN291519.1_scaffold-19707	217783	1	2.80E-26	52:C>T	52	1	1	0.016043	0.983957	0	0.016043	0	0.031571	0.015785	11.49574	5.42857	1	0	0	0	0	0	0	0	0	0	0	0	0	0	0	0	0	0	0	0	0	0	0	0	0	0	0	0	0	0
23115472|F|0-5:G>A-5:G>A	TGCAGGCAGCTAGGACAGTCCTTTCCTCTAGGAAGTGGACTGCTTCTTGGATACTAACAAGCACAGGCA	TGCAGGCAGCTAGGACAGTCCTTTCCTCTAGGAAGTGGACTGCTTCTTGGATACTAACAAGCACAGGCA	KN284359.1_scaffold-9324	83500	1	1.84E-28	5:G>A	5	0.991979	0.994609	0.086253	0.913747	0.005391	0.080863	0.010724	0.157627	0.084176	7.35792	4.18605	1	0	0	0	0	0	0	0	0	0	0	0	0	0	0	0	0	0	0	0	0	0	0	0	0	0	0	0	0	0
23115474|F|0-15:C>G-15:C>G	TGCAGGCAGCTCATCCAGAGTCATGGGGGTGTGCAGCTCCCCACCGCTGTGCATACCTCCAAAGGAGGC	TGCAGGCAGCTCATCCAGAGTCATGGGGGTGTGCAGCTCCCCACCGCTGTGCATACCTCCAAAGGAGGC	KN286050.1_scaffold-11741	51131	1	1.84E-28	15:C>G	15	0.997326	0.989276	0.168901	0.831099	0.010724	0.158177	0.021218	0.280747	0.150982	8.71121	5.12162	1	0	0	0	0	0	0	0	0	0	0	0	2	0	0	0	2	0	0	0	0	0	0	0	2	0	0	0	0	0
23115475|F|0-45:C>T-45:C>T	TGCAGGCAGCTCTTCAACCAGCCAGGCTGTGCTCCTAACTGCCTGCATGAGCGGTTCAGCAGGAATGCC	TGCAGGCAGCTCTTCAACCAGCCAGGCTGTGCTCCTAACTGCCTGCATG	KN284555.1_scaffold-9598	74121	1	1.35E-17	45:C>T	45	1	1	0.002674	0.997326	0	0.002674	0	0.005333	0.002667	9.75906	3	1	0	0	0	0	0	0	0	0	0	0	0	0	0	0	0	0	0	0	0	0	0	0	0	0	0	0	0	0	0
23115480|F|0-38:T>G-38:T>G	TGCAGGCAGCTGGGGGAGTTGCTATTCACTGCTCCCTGTATGAATTGCTGGCAGCATGAGCGGTTCAGC	TGCAGGCAGCTGGGGGAGTTGCTATTCACTGCTCCCTGTATGAATTGCTGGCAGCATG	KN283551.1_scaffold-8161	197697	1	1.79E-22	38:T>G	38	1	0.967914	0.235294	0.764706	0.032086	0.203209	0.062112	0.359862	0.210987	8.32895	5.57407	1	0	0	2	0	0	0	0	0	0	0	0	0	0	0	0	0	0	0	0	0	0	0	0	0	0	0	0	1	0
23115483|F|0-30:G>C-30:G>C	TGCAGGCAGCTGTCCAGGCCCAGTAGCACAGGGCCATGTGGGGGCCAGAGAGCCAGCACGAGATCCCTG	TGCAGGCAGCTGTCCAGGCCCAGTAGCACAGGGCCATGTGGGGGCCAGAGAGCCAGCACGAGATCCCTG	KN280665.1_scaffold-4059	167183	1	1.84E-28	30:G>C	30	0.994652	0.983871	0.126344	0.873656	0.016129	0.110215	0.031738	0.220763	0.12625	5.88453	3.05556	1	0	0	0	0	0	0	0	0	0	0	0	2	0	0	2	0	0	0	0	0	0	0	0	0	0	0	0	0	0
23115496|F|0-27:C>T-27:C>T	TGCAGGCAGGCGCCAGGGGCCCTGGAACGGAAGGGATCTGAGCTAAGACCTCCCATCATGGCAGGTCCT	TGCAGGCAGGCGCCAGGGGCCCTGGAACGGAAGGGATCTGAGCTAAGACCTCCCATCATGGCAGGTCCT	KN286567.1_scaffold-12502	522390	1	1.84E-28	27:C>T	27	0.997326	1	0.002681	0.997319	0	0.002681	0	0.005348	0.002674	6.48932	3	1	0	0	0	0	0	0	0	0	0	0	0	0	0	0	0	0	0	0	0	0	0	0	0	0	0	0	0	0	0
23115499|F|0-15:G>A-15:G>A	TGCAGGCAGGGAGCAGAGAGGCAGGGCCAACCCTGATGTGGTGAAGAGAGCCCAGCCCAGAGAGCATGA	TGCAGGCAGGGAGCAGAGAGGCAGGGCCAACCCTGATGTGGTGAAGAGAGCCCAGCCCAGAGAGCATGA	KN282586.1_scaffold-6757	104033	3	6.63E-28	15:G>A	15	0.997326	0.994638	0.053619	0.946381	0.005362	0.048257	0.010666	0.101489	0.056077	11.34624	8.03846	1	0	0	0	0	0	0	0	0	2	0	0	0	2	0	0	0	0	0	0	0	0	0	0	0	0	0	0	0	0
23115501|F|0-25:G>A-25:G>A	TGCAGGCAGGGAGCAGAGGGGAGGGGCCAGCCCTGTTGTGGAGCAGAGATCCCCGCCCAGCCCAGGGAG	TGCAGGCAGGGAGCAGAGGGGAGGGGCCAGCCCTGTTGTGGAGCAGAGATCCCCGCCCAGCCCAGGGAG	KN288731.1_scaffold-15609	210059	12	1.84E-28	25:G>A	25	1	0.991979	0.069519	0.930481	0.008021	0.061497	0.015914	0.129372	0.072643	11.11853	6.55556	1	0	0	0	0	0	0	0	0	0	0	0	0	0	0	0	0	0	0	0	0	0	0	0	0	0	0	0	0	0
23115515|F|0-60:G>T-60:G>T	TGCAGGCAGGTAGGGGTCTGTGTCTGGCCTGGGCCAGGTTCTTAGGGCAATGACAGTGCAGGACTGGGA	TGCAGGCAGGTAGGGGTCTGTGTCTGGCCTGGGCCAGGTTCTTAGGGCAATGACAGTGCAGGACTGGGA	KN286975.1_scaffold-13098	175626	1	1.84E-28	60:G>T	60	0.86631	0.910494	0.212963	0.787037	0.089506	0.123457	0.16299	0.335219	0.249105	4.40496	3.65854	1	0	0	0	0	0	0	0	0	0	0	-	2	1	2	-	2	0	0	0	0	0	0	0	0	-	0	0	2	0
23115516|F|0-22:T>C-22:T>C	TGCAGGCAGGTGGTGTTGGCCTTGCTGCCCATAAGCTGCCTGCATGAGCGGTTCAGCAGGAATGCCGAG	TGCAGGCAGGTGGTGTTGGCCTTGCTGCCCATAAGCTGCCTGCATG	KN284583.1_scaffold-9640	139998	1	5.50E-16	22:T>C	22	0.981283	1	0.002725	0.997275	0	0.002725	0	0.005435	0.002717	7.82183	3	1	0	0	0	0	0	0	0	0	0	0	0	0	0	2	0	0	0	0	0	0	0	0	0	0	0	0	0	0	0
23115522|F|0-21:G>A-21:G>A	TGCAGGCAGTCACCAATCACTGCTGGCCGCCACCAATGCTGCCGGCAGCATCTACAGGTATTTACAGAT	TGCAGGCAGTCACCAATCACTGCTGGCCGCCACCAATGCTGCCGGCAGCATCTACAGGTATTTACAGAT	KN284813.1_scaffold-9979	32880	1	1.84E-28	21:G>A	21	1	0.997326	0.02139	0.97861	0.002674	0.018717	0.005333	0.041866	0.023599	7.87207	4	1	0	0	0	0	0	0	0	0	0	0	0	2	0	0	0	2	0	0	0	0	0	0	0	0	0	0	0	2	0
23115533|F|0-20:G>A-20:G>A	TGCAGGCAGTTAGAAAACTCGCCCTCAGTTATACCAGGCTGTAGGCATGAGCGGTTCAGCAGGAATGCC	TGCAGGCAGTTAGAAAACTCGCCCTCAGTTATACCAGGCTGTAGGCATG	KN277888.1_scaffold-146	18370	1	1.35E-17	20:G>A	20	0.965241	1	0.00277	0.99723	0	0.00277	0	0.005525	0.002762	8.13808	5	1	0	0	0	0	0	0	0	0	0	0	0	0	0	0	0	0	0	0	0	0	0	0	0	0	0	0	0	0	0
23115534|F|0-20:T>C-20:T>C	TGCAGGCAGTTCCAGGGACATATGCCCCCCATGCCCTCCTGGGGTGCATGAGCGGTTCAGCAGGAATGC	TGCAGGCAGTTCCAGGGACATATGCCCCCCATGCCCTCCTGGGGTGCATG	KN282264.1_scaffold-6316	138988	10	3.91E-18	20:T>C	20	0.997326	1	0.002681	0.997319	0	0.002681	0	0.005348	0.002674	9.47323	3	1	0	0	0	0	0	0	2	0	0	0	0	0	0	0	0	0	0	0	0	0	0	0	0	0	0	0	0	0	0
23115536|F|0-20:T>G-20:T>G	TGCAGGCAGTTGCCATGCCCTCGCCCTCTCCCCTCCCCAGCCTTGGGTAGCATGAGCGGTTCAGCAGGA	TGCAGGCAGTTGCCATGCCCTCGCCCTCTCCCCTCCCCAGCCTTGGGTAGCATG	KN288222.1_scaffold-14878	7241	1	2.62E-20	20:T>G	20	0.997326	1	0.002681	0.997319	0	0.002681	0	0.005348	0.002674	10.08529	3	1	0	0	0	0	0	0	0	0	0	0	0	0	0	0	0	0	0	0	0	0	0	0	0	0	0	0	0	0	0
23115543|F|0-12:C>A-12:C>A	TGCAGGCATCCCCACACCCCGACTGGTTAGCCGCAGCAGCAGCATGAGCGGTTCAGCAGGAATGCCGAG	TGCAGGCATCCCCACACCCCGACTGGTTAGCCGCAGCAGCAGCATG	KN286358.1_scaffold-12197	174532	1	5.50E-16	12:C>A	12	1	1	0.13369	0.86631	0	0.13369	0	0.231634	0.115817	12.13006	7.33333	1	0	0	0	0	0	0	0	0	0	0	0	0	0	0	0	0	0	0	0	0	2	0	0	0	0	0	0	0	0
23115544|F|0-41:A>T-41:A>T	TGCAGGCATCTCCAAAATGCTTGACGAGTTGGCCTGCTGACAACTTAGCATGAGCGGTTCAGCAGGAAT	TGCAGGCATCTCCAAAATGCTTGACGAGTTGGCCTGCTGACAACTTAGCATG	KN291641.1_scaffold-19885	125107	1	3.14E-19	41:A>T	41	0.983957	0.98913	0.07337	0.92663	0.01087	0.0625	0.021503	0.135973	0.078738	13.02188	5.84375	1	0	0	0	0	0	2	0	0	0	0	0	0	0	0	0	0	0	0	0	0	0	0	0	0	0	0	0	0	0
23115551|F|0-26:C>T-26:C>T	TGCAGGCATGGTACCAAGCTGGGGGGCGTAAGGGAGGGGCTCGCCAAGCCCTGGTGCATGAGCGGTTCA	TGCAGGCATGGTACCAAGCTGGGGGGCGTAAGGGAGGGGCTCGCCAAGCCCTGGTGCATG	KN283038.1_scaffold-7440	108415	1	1.47E-23	26:C>T	26	1	0.97861	0.07754	0.92246	0.02139	0.05615	0.041866	0.143055	0.09246	8.31087	4.30556	1	0	0	0	0	0	0	0	0	2	0	0	0	0	0	0	0	0	0	0	0	0	0	0	0	0	0	0	0	0
23115558|F|0-33:G>A-33:G>A	TGCAGGCATTCCTAGGGCTAACTGGGTTCTGTCGAATACCAGATTATGGTGAGAAGGCTAAACCACTGT	TGCAGGCATTCCTAGGGCTAACTGGGTTCTGTCGAATACCAGATTATGGTGAGAAGGCTAAACCACTGT	JRXG01080573.1_scaffold-16192_1	28552	4	1.88E-13	33:G>A	33	0.970588	1	0.008264	0.991736	0	0.008264	0	0.016392	0.008196	4.63111	3	1	0	0	0	0	0	0	0	0	0	0	0	0	0	0	0	0	0	0	0	0	0	0	0	-	0	0	0	0	0
23115564|F|0-18:C>T-18:C>T	TGCAGGCCAAAGCCAGGGCTTCTGCCCCTACGTGCTGCATGAGCGGTTCAGCAGGAATGCCGAGACCGA	TGCAGGCCAAAGCCAGGGCTTCTGCCCCTACGTGCTGCATG	KN288946.1_scaffold-15909	197233	1	2.52E-13	18:C>T	18	0.997326	1	0.016086	0.983914	0	0.016086	0	0.031654	0.015827	11.65598	4	1	0	0	0	0	0	0	0	0	0	0	0	0	0	0	0	0	0	0	0	0	0	0	0	0	0	0	0	0	0
23115568|F|0-18:A>G-18:A>G	TGCAGGCCAAGGCACTTAAGGGATCCCACCCCTGCACCAGCCTTAGAGTGAGCTGTAGGCAAGGCAAAG	TGCAGGCCAAGGCACTTAAGGGATCCCACCCCTGCACCAGCCTTAGAGTGAGCTGTAGGCAAGGCAAAG	JRXG01099798.1_scaffold-20446_1	8535	10	1.84E-28	18:A>G	18	0.997326	0.994638	0.061662	0.938338	0.005362	0.0563	0.010666	0.11572	0.063193	5.37204	3.46429	1	0	0	0	0	0	0	0	0	0	0	0	0	2	0	0	0	0	0	0	0	0	0	0	0	0	0	0	1	0
23115569|F|0-20:T>G-20:T>G	TGCAGGCCAAGGTCTGGGTTTAAACCCCTCCTCAGTCTTACTCAGGCATGAGCGGTTCAGCAGGAATGC	TGCAGGCCAAGGTCTGGGTTTAAACCCCTCCTCAGTCTTACTCAGGCATG	KN290907.1_scaffold-18799	24785	10	3.91E-18	20:T>G	20	0.933155	1	0.002865	0.997135	0	0.002865	0	0.005714	0.002857	6.03059	3	1	0	0	0	0	0	0	0	0	0	-	0	0	0	0	0	0	0	0	0	0	0	0	0	0	0	0	0	0	0
23115571|F|0-35:C>A-35:C>A	TGCAGGCCAAGTGGGAAAGGGGACTTGGTTTCTGCCTGGTCCAGCTGCATGAGCGGTTCAGCAGGAATG	TGCAGGCCAAGTGGGAAAGGGGACTTGGTTTCTGCCTGGTCCAGCTGCATG	KN279207.1_scaffold-1998	172314	1	1.09E-18	35:C>A	35	0.97861	1	0.005464	0.994536	0	0.005464	0	0.010869	0.005435	7.3033	4	1	0	0	0	0	0	0	0	0	0	0	0	0	0	0	0	0	0	0	0	0	0	0	0	0	0	0	0	0	0
23115580|F|0-46:C>T-46:C>T	TGCAGGCCACTGTCCTGTGTGCACCTGCCCTGGCCCTCACCACGCACGTTCTGCTCCCCACCCGGGCGC	TGCAGGCCACTGTCCTGTGTGCACCTGCCCTGGCCCTCACCACGCACGTTCTGCTCCCCACCCGGGCGC	KN289897.1_scaffold-17324	80020	1	1.84E-28	46:C>T	46	1	0.989305	0.120321	0.879679	0.010695	0.109626	0.021162	0.211687	0.116425	10.69697	6.18966	1	0	2	0	0	0	0	0	0	0	0	0	0	0	0	0	0	0	0	0	0	0	0	0	2	0	2	2	2	0
23115586|F|0-38:C>T-38:C>T	TGCAGGCCAGATAGAGTGGCCCTGTGTGCTAGGTCATACCAGCACATGAAGCGCAGCCAGGGTTCAGCT	TGCAGGCCAGATAGAGTGGCCCTGTGTGCTAGGTCATACCAGCACATGAAGCGCAGCCAGGGTTCAGCT	KN280468.1_scaffold-3794	151147	1	1.84E-28	38:C>T	38	0.997326	1	0.032172	0.967828	0	0.032172	0	0.062273	0.031137	9.45416	4	1	0	0	0	0	0	0	0	0	0	0	0	0	0	0	0	0	0	0	0	0	0	0	0	0	0	2	0	0	0
23115591|F|0-12:C>T-12:C>T	TGCAGGCCAGATCCAGCCCATGAAGACTGAATCCAGTCCACAACAGCTCAGGGAATCAGCAGCATGAGC	TGCAGGCCAGATCCAGCCCATGAAGACTGAATCCAGTCCACAACAGCTCAGGGAATCAGCAGCATGAGC	KN285976.1_scaffold-11631	103301	1	8.58E-27	12:C>T	12	1	0.997326	0.042781	0.957219	0.002674	0.040107	0.005333	0.081901	0.043617	12.63462	6.66667	1	0	0	0	0	0	0	0	0	0	0	0	0	0	0	2	0	0	0	0	0	0	0	0	0	0	0	2	0	0
23115614|F|0-31:T>G-31:T>G	TGCAGGCCATGCAGAGCCATAAGGAACAAGCTATCTGTGAGAGTTTGCAACATTTGTGAGATAAGATGC	TGCAGGCCATGCAGAGCCATAAGGAACAAGCTATCTGTGAGAGTTTGCAACATTTGTGAGATAAGATGC	KN278201.1_scaffold-577	28296	1	1.84E-28	31:T>G	31	0.989305	1	0.002703	0.997297	0	0.002703	0	0.005391	0.002695	5.95484	3	1	0	0	0	0	0	0	0	0	0	0	0	0	0	0	0	0	0	0	0	-	0	0	0	0	0	0	0	0	0
23115618|F|0-66:T>C-66:T>C	TGCAGGCCATTCGGGGCTGGTTCGGGGCACTCCCAGGATTGCTGGCAGCTGTACTCCCCCAGCTGCTTG	TGCAGGCCATTCGGGGCTGGTTCGGGGCACTCCCAGGATTGCTGGCAGCTGTACTCCCCCAGCTGCTTG	KN286965.1_scaffold-13087	83056	1	1.84E-28	66:T>C	66	0.973262	1	0.010989	0.989011	0	0.010989	0	0.021737	0.010868	4.79075	3.25	1	0	0	0	0	0	0	0	0	0	0	0	0	0	0	0	0	0	0	0	0	0	0	0	0	0	0	0	0	0
23115624|F|0-23:G>A-23:G>A	TGCAGGCCCAGCGTGGGGCTGCCGGGGTGGTGGCTGCACTGCATGAGCGGTTCAGCAGGAATGCCGAGA	TGCAGGCCCAGCGTGGGGCTGCCGGGGTGGTGGCTGCACTGCATG	KN290488.1_scaffold-18191	288199	1	1.88E-15	23:G>A	23	0.973262	1	0.002747	0.997253	0	0.002747	0	0.005479	0.00274	11.41111	3	1	0	0	0	0	0	-	0	0	0	0	0	0	0	0	0	0	0	0	0	0	0	0	0	0	0	0	0	-	0
23115636|F|0-62:A>G-62:A>G	TGCAGGCCCCCGACGCCTGCATCATACCACCATGTGCTCCTGAATGCTCATCGCAAGACTCAATGTCGA	TGCAGGCCCCCGACGCCTGCATCATACCACCATGTGCTCCTGAATGCTCATCGCAAGACTCAATGTCGA	KN282220.1_scaffold-6260	301034	1	1.84E-28	62:A>G	62	0.994652	1	0.032258	0.967742	0	0.032258	0	0.062435	0.031217	6.17204	3.85714	1	0	0	0	0	0	0	0	0	0	0	0	0	0	0	0	0	0	0	0	0	0	0	0	0	0	0	0	0	0
23115644|F|0-20:C>A-20:C>A	TGCAGGCCCGGCACCATGGGCACAAAGCCCTGAGTGGCGGCGACCCCCCATGGGCCTGTGAGGAACAGG	TGCAGGCCCGGCACCATGGGCACAAAGCCCTGAGTGGCGGCGACCCCCCATGGGCCTGTGAGGAACAGG	KN293209.1_scaffold-22214	127935	1	1.84E-28	20:C>A	20	1	1	0.002674	0.997326	0	0.002674	0	0.005333	0.002667	8.99149	3	1	0	0	0	0	0	0	0	0	0	0	0	0	0	0	0	0	0	0	0	0	0	0	0	0	0	0	0	0	0
23115651|F|0-32:C>G-32:C>G	TGCAGGCCGAGGAGATGCCAGTTGTATCAGTGCCCCTGGAAGTGGCGGAGGAAGGCATGAGCGGTTCAG	TGCAGGCCGAGGAGATGCCAGTTGTATCAGTGCCCCTGGAAGTGGCGGAGGAAGGCATG	KN285651.1_scaffold-11154	8268	1	5.12E-23	32:C>G	32	0.994652	1	0.005376	0.994624	0	0.005376	0	0.010695	0.005347	7.7306	5	1	0	0	0	0	0	0	0	0	0	0	0	0	0	0	0	0	0	0	0	0	0	0	0	0	0	0	0	0	0
23115654|F|0-25:G>A-25:G>A	TGCAGGCCGCCATCGACAGCAACCGGCGAGAGGGCCGGCGGCAGAGCTTTGGTGGCTCCCTCTTCACCT	TGCAGGCCGCCATCGACAGCAACCGGCGAGAGGGCCGGCGGCAGAGCTTTGGTGGCTCCCTCTTCACCT	KN278990.1_scaffold-1697	31954	1	1.84E-28	25:G>A	25	1	1	0.018717	0.981283	0	0.018717	0	0.036733	0.018366	9.10021	4.625	1	0	0	0	0	0	0	0	0	0	0	0	0	0	0	0	0	0	0	0	0	0	0	0	0	0	0	0	0	0
23115657|F|0-7:C>T-7:C>T	TGCAGGCCGGATCTGGCCTATACAACTGTATGATCTGGGCCGTGGGTCTCGGACTGACTCGTGTGGCAT	TGCAGGCCGGATCTGGCCTATACAACTGTATGATCTGGGCCGTGGGTCTCGGACTGACTCGTGTGGCAT	KN280280.1_scaffold-3538	366978	1	1.84E-28	7:C>T	7	1	1	0.010695	0.989305	0	0.010695	0	0.021162	0.010581	9.96162	2.5	1	0	0	0	0	0	0	0	0	0	0	0	0	0	0	0	0	0	0	0	0	0	0	0	0	0	0	0	0	0
23115660|F|0-18:G>A-18:G>A	TGCAGGCCGTGCTGTGAAGTTCCTTGCTGCCCCGTGCTGTGGGGCAGGGGCATGAGCGGTTCAGCAGGA	TGCAGGCCGTGCTGTGAAGTTCCTTGCTGCCCCGTGCTGTGGGGCAGGGGCATG	KN284273.1_scaffold-9197	332912	1	2.62E-20	18:G>A	18	0.997326	1	0.005362	0.994638	0	0.005362	0	0.010666	0.005333	10.03854	7	1	0	0	0	0	0	0	0	0	0	0	0	0	0	0	0	0	0	0	0	0	0	0	0	0	0	0	0	0	0
23115662|F|0-28:T>G-28:T>G	TGCAGGCCTACCTCACGAGAGCATGGAGTGTGCGACACTCTCCCTGCCTGAGTCGCACCTCCCTCCCCC	TGCAGGCCTACCTCACGAGAGCATGGAGTGTGCGACACTCTCCCTGCCTGAGTCGCACCTCCCTCCCCC	KN293873.1_scaffold-23211	187744	1	1.84E-28	28:T>G	28	0.997326	0.887399	0.410188	0.589812	0.112601	0.297587	0.199843	0.483867	0.341855	8.26506	5.50259	1	0	0	0	0	0	0	0	2	2	2	2	0	0	1	0	2	0	0	2	2	0	2	2	2	0	2	0	0	1
23115671|F|0-65:T>C-65:T>C	TGCAGGCCTCGCGTACCTGCTCAGCTGGGGAGGGGGGAAATCAAACATGGTGGCCACCACCACACTACT	TGCAGGCCTCGCGTACCTGCTCAGCTGGGGAGGGGGGAAATCAAACATGGTGGCCACCACCACACTACT	KN285634.1_scaffold-11134	42558	1	1.84E-28	65:T>C	65	1	0.983957	0.128342	0.871658	0.016043	0.112299	0.031571	0.223741	0.127656	9.72138	5.26316	1	2	0	0	0	0	0	0	0	0	0	0	2	2	0	0	0	0	0	0	0	0	0	0	1	0	0	0	0	0
23115674|F|0-22:A>T-22:A>T	TGCAGGCCTGACTTCTCTGCTGACTATTTGCATTCTTGTAAGAATCTGAGATTGCAGCTGAAAGTTTTG	TGCAGGCCTGACTTCTCTGCTGACTATTTGCATTCTTGTAAGAATCTGAGATTGCAGCTGAAAGTTTTG	KN285156.1_scaffold-10444	18423	1	1.84E-28	22:A>T	22	0.991979	1	0.002695	0.997305	0	0.002695	0	0.005376	0.002688	7.12876	3	1	0	0	0	0	0	0	0	0	0	0	2	0	0	0	0	0	0	0	0	0	0	0	0	0	0	0	0	0	0
23115686|F|0-31:A>C-31:A>C	TGCAGGCCTGGGAGCCTTCGAGGGGGATTTCAAAGGGAGCAGCCAGACCACAGTGCAGAGCCGCATGTG	TGCAGGCCTGGGAGCCTTCGAGGGGGATTTCAAAGGGAGCAGCCAGACCACAGTGCAGAGCCGCATGTG	KN284706.1_scaffold-9823	577260	1	1.84E-28	31:A>C	31	1	0.975936	0.139037	0.860963	0.024064	0.114973	0.04697	0.239412	0.143191	8.32244	6.59375	1	0	0	0	0	0	0	0	0	0	0	0	0	0	0	0	0	0	0	0	0	0	0	0	2	0	0	0	0	0
23115689|F|0-13:G>A-13:G>A	TGCAGGCCTGTCAGTCAGCCCTGACCCACTTTCAGCCCTGCGCAGGCTCAGTTGCTACACAGACCTTAT	TGCAGGCCTGTCAGTCAGCCCTGACCCACTTTCAGCCCTGCGCAGGCTCAGTTGCTACACAGACCTTAT	KN290127.1_scaffold-17661	26432	10	1.84E-28	13:G>A	13	0.981283	0.99455	0.054496	0.945504	0.00545	0.049046	0.01084	0.103052	0.056946	5.76264	3.44	1	0	0	0	0	0	2	0	0	0	0	0	0	0	0	0	0	0	0	0	0	0	0	0	0	0	0	0	0	0
23115691|F|0-20:C>A-20:C>A	TGCAGGCCTGTCTGTCTACACCAGGATTCCAGGGAAGATAGGGATGAGCCATACACAGGCATGAGCGGT	TGCAGGCCTGTCTGTCTACACCAGGATTCCAGGGAAGATAGGGATGAGCCATACACAGGCATG	KN289958.1_scaffold-17413	55820	1	3.43E-25	20:C>A	20	0.983957	0.967391	0.209239	0.790761	0.032609	0.17663	0.063091	0.330916	0.197003	8.04911	5.2766	1	0	0	2	0	2	0	2	0	0	0	0	0	0	0	0	0	0	0	0	0	0	0	2	0	0	0	0	0	2
23115701|F|0-28:C>T-28:C>T	TGCAGGCGAGGGGCAGAAACGTTTCACTCGATGCATGAGCGGTTCAGCAGGAATGCCGAGACCGATCTC	TGCAGGCGAGGGGCAGAAACGTTTCACTCGATGCATG	KN284273.1_scaffold-9197	576252	1	3.16E-11	28:C>T	28	1	1	0.008021	0.991979	0	0.008021	0	0.015914	0.007957	13.68298	6.66667	1	0	0	0	0	0	0	0	0	0	2	0	0	0	0	0	0	0	0	0	0	0	0	0	0	0	0	0	0	0
23115702|F|0-20:C>A-20:C>A	TGCAGGCGATTGAAGTTAAGCTTCTTAGCCATATTCAGGCGCCTAAATGTGTGGCATGAGCGGTTCAGC	TGCAGGCGATTGAAGTTAAGCTTCTTAGCCATATTCAGGCGCCTAAATGTGTGGCATG	KN290173.1_scaffold-17732	20032	1	1.79E-22	20:C>A	20	0.991979	1	0.002695	0.997305	0	0.002695	0	0.005376	0.002688	10.04516	3	1	0	0	0	0	0	0	0	0	0	0	0	0	0	0	0	0	0	0	0	0	0	0	0	0	0	0	0	0	0
23115704|F|0-12:C>A-12:C>A	TGCAGGCGCACACGGCCTGCGCAGAACAATGAGCTGGAGAATCCTCCAAGTCAGGAGCATGAGCGGTTC	TGCAGGCGCACACGGCCTGCGCAGAACAATGAGCTGGAGAATCCTCCAAGTCAGGAGCATG	JRXG01041676.1_scaffold-8033_1	26966	1	4.20E-24	12:C>A	12	1	0.930481	0.296791	0.703209	0.069519	0.227273	0.129372	0.417413	0.273392	10.10023	6.11806	1	0	0	2	0	0	0	0	2	0	0	0	0	0	2	0	0	0	0	0	0	0	0	0	0	2	0	0	2	0
23115709|F|0-19:T>A-19:T>A	TGCAGGCGCCTTCAAGCACTCGCAGGCTGTCTTACAGGAGGCAGGTACATGGCCAGTTAGGTGTGGTGT	TGCAGGCGCCTTCAAGCACTCGCAGGCTGTCTTACAGGAGGCAGGTACATGGCCAGTTAGGTGTGGTGT	KN292401.1_scaffold-21018	28388	1	1.84E-28	19:T>A	19	0.997326	0.997319	0.045576	0.954424	0.002681	0.042895	0.005348	0.086998	0.046173	7.73391	4.52381	1	0	0	0	0	0	0	0	0	0	0	0	0	0	0	0	0	0	0	0	0	0	0	0	0	0	0	0	0	0
23115721|F|0-67:C>G-67:C>G	TGCAGGCGGGAGGCGATCCCCGCTGCCCCCTGCTGCCCCACATCATGGGGGGGGGGCTCTGCATGAGCG	TGCAGGCGGGAGGCGATCCCCGCTGCCCCCTGCTGCCCCACATCATGGGGGGGGGGCTCTGCATG		0	0	999	67:C>G	67	0.991979	1	0.002695	0.997305	0	0.002695	0	0.005376	0.002688	6.33262	3	1	0	0	0	0	0	0	0	0	0	0	0	0	0	0	0	0	0	0	0	0	0	0	0	0	0	0	0	0	0
23115722|F|0-57:G>C-57:G>C	TGCAGGCGGTGTGGCAGCTGCCAAGAAATGCCAGGACCACAAACTTCCCTGGTGAAAGGTAGGTAGGAA	TGCAGGCGGTGTGGCAGCTGCCAAGAAATGCCAGGACCACAAACTTCCCTGGTGAAAGGTAGGTAGGAA	KN288887.1_scaffold-15836	20396	1	1.84E-28	57:G>C	57	0.997326	0.981233	0.168901	0.831099	0.018767	0.150134	0.036829	0.280747	0.158788	6.94783	4.35211	1	0	0	0	0	2	0	0	0	0	0	0	0	0	0	0	0	0	0	0	0	0	0	0	0	0	0	0	0	0
23115736|F|0-21:T>G-21:T>G	TGCAGGCTACAACATAAAAGCTAGACCTTTCTGGTCCAAAATACAATTCCCTCCCTACCAGAGAGAGAG	TGCAGGCTACAACATAAAAGCTAGACCTTTCTGGTCCAAAATACAATTCCCTCCCTACCAGAGAGAGAG	KN282985.1_scaffold-7360	4393	2	1.84E-28	21:T>G	21	1	1	0.002674	0.997326	0	0.002674	0	0.005333	0.002667	11.5	3	1	0	0	0	0	0	0	0	0	0	0	0	0	0	0	0	0	0	0	0	0	0	0	0	0	0	0	0	0	0
23115737|F|0-10:A>G-10:A>G	TGCAGGCTACATGTGCCAGCCTGCCTGCACCTCAGTGCCACTGCATGAGCGGTTCAGCAGGAATGCCGA	TGCAGGCTACATGTGCCAGCCTGCCTGCACCTCAGTGCCACTGCATG	KN277973.1_scaffold-269	171793	1	1.60E-16	10:A>G	10	0.994652	1	0.018817	0.981183	0	0.018817	0	0.036926	0.018463	8.26395	3.75	1	0	0	0	0	0	0	0	0	0	0	0	0	0	0	0	0	0	0	0	0	0	0	0	0	0	0	0	0	0
23115739|F|0-19:G>A-19:G>A	TGCAGGCTACGTTCCCGGCGCGGCACGGCGCCAGGCCTCGCTGGGATGCATGAGCGGTTCAGCAGGAAT	TGCAGGCTACGTTCCCGGCGCGGCACGGCGCCAGGCCTCGCTGGGATGCATG	KN289965.1_scaffold-17430	53863	1	1.46E-17	19:G>A	19	1	1	0.010695	0.989305	0	0.010695	0	0.021162	0.010581	17.12128	7.8	1	0	0	0	0	0	0	0	0	0	0	0	0	0	0	0	0	0	0	0	0	0	0	0	0	0	0	0	0	0
23115743|F|0-16:C>T-16:C>T	TGCAGGCTAGATCAGGCTTTGGGGGTCTGGTATCACTTCCTCTTGCATGAGCGGTTCAGCAGGAATGCC	TGCAGGCTAGATCAGGCTTTGGGGGTCTGGTATCACTTCCTCTTGCATG	KN291647.1_scaffold-19895	37621	1	1.35E-17	16:C>T	16	0.997326	0.997319	0.077748	0.922252	0.002681	0.075067	0.005348	0.143406	0.074377	10.09657	5.42105	1	0	0	0	0	0	0	0	0	0	0	2	0	2	0	0	0	0	0	0	0	0	0	0	0	0	0	2	0	0
23115746|F|0-20:C>T-20:C>T	TGCAGGCTAGTGTCCACCTTCCTGAGACCAGGTGCCCGCTTACTGCTTTTAATGGTAAATAAAGCATGA	TGCAGGCTAGTGTCCACCTTCCTGAGACCAGGTGCCCGCTTACTGCTTTTAATGGTAAATAAAGCATGA	KN282453.1_scaffold-6575	13954	1	6.63E-28	20:C>T	20	0.994652	0.991935	0.083333	0.916667	0.008065	0.075269	0.015999	0.152778	0.084388	8.58836	4.89474	1	0	0	0	0	0	0	2	0	2	0	0	0	0	0	0	0	0	0	0	0	0	0	0	0	0	0	0	0	0
23110356|F|0-66:A>G-66:A>G	TGCAGGCTCACGTTCATCTTGTGATGACCCCCAAGTCTCTGTCTTCTGTAGTGCTAGCCAGCGTAGAAC	TGCAGGCTCACGTTCATCTTGTGATGACCCCCAAGTCTCTGTCTTCTGTAGTGCTAGCCAGCGTAGAAC	KN282199.1_scaffold-6232	110833	2	6.68E-23	66:A>G	66	0.868984	0.006154	0.996923	0.003077	0.993846	0.003077	0.012232	0.006135	0.009183	8.66667	6.61905	1	-	1	1	1	1	1	1	1	1	1	1	1	1	1	1	1	1	1	1	1	1	1	-	1	-	1	1	1	1
23115768|F|0-22:G>A-22:G>A	TGCAGGCTCCTGGGGCTTTCACGGCACTCAGCTCTCAGCAGTTCCACCAGGGCCGATTTAACAGTAAGC	TGCAGGCTCCTGGGGCTTTCACGGCACTCAGCTCTCAGCAGTTCCACCAGGGCCGATTTAACAGTAAGC	KN279748.1_scaffold-2791	59272	1	1.84E-28	22:G>A	22	0.957219	1	0.013966	0.986034	0	0.013966	0	0.027543	0.013771	3.91441	4	1	0	0	0	0	0	0	0	0	-	0	0	0	-	0	0	-	0	0	0	0	0	0	0	0	0	0	0	0	0
23115780|F|0-8:C>G-8:C>G	TGCAGGCTCTGAGAGGCAAAGGCTAGGTACAGATCTTACACTTAATGTGCTTTGAGCATGAGCGGTTCA	TGCAGGCTCTGAGAGGCAAAGGCTAGGTACAGATCTTACACTTAATGTGCTTTGAGCATG	KN281571.1_scaffold-5356	73974	1	1.47E-23	8:C>G	8	0.991979	0.997305	0.026954	0.973046	0.002695	0.024259	0.005376	0.052455	0.028916	13.37204	7.18182	1	0	0	0	0	0	0	0	0	0	0	0	0	0	0	0	0	0	0	0	0	0	0	0	0	0	0	0	0	0
23115788|F|0-68:G>A-68:G>A	TGCAGGCTGAAATGGAAAAGGACTAGAAATGCCGACCAAGATTACCTGGATGAGAGATCATTTCTATTG	TGCAGGCTGAAATGGAAAAGGACTAGAAATGCCGACCAAGATTACCTGGATGAGAGATCATTTCTATTG	KN288372.1_scaffold-15103	117004	1	1.84E-28	68:G>A	68	0.991979	0.989218	0.132075	0.867925	0.010782	0.121294	0.021331	0.229263	0.125297	9.09935	4.15254	1	0	0	0	0	2	0	0	0	0	0	0	0	0	0	0	2	2	2	0	0	0	0	0	0	0	0	0	0	0
23115799|F|0-29:G>T-29:G>T	TGCAGGCTGATACCTGGCTATTGTACTGTGTCCCCACCCCTCAGGGCAAATTTCAGTGGTAAGCAAAGT	TGCAGGCTGATACCTGGCTATTGTACTGTGTCCCCACCCCTCAGGGCAAATTTCAGTGGTAAGCAAAGT	KN288286.1_scaffold-14967	26685	1	1.84E-28	29:G>T	29	0.986631	0.99458	0.02439	0.97561	0.00542	0.01897	0.010781	0.047591	0.029186	7.68898	4.22222	1	0	0	0	0	0	0	0	0	0	0	0	0	0	0	0	0	0	0	0	0	0	0	0	0	0	0	0	0	0
23115824|F|0-35:G>A-35:G>A	TGCAGGCTGGAACCCAGTCCCTGGTACTATCCCTAGCCAGAGCAAACCTATACTTGGCATGAGCGGTTC	TGCAGGCTGGAACCCAGTCCCTGGTACTATCCCTAGCCAGAGCAAACCTATACTTGGCATG	KN289660.1_scaffold-16967	52327	1	4.20E-24	35:G>A	35	1	1	0.005348	0.994652	0	0.005348	0	0.010638	0.005319	10.9234	4	1	0	0	0	0	0	0	0	0	0	0	0	0	0	0	0	0	0	0	0	0	0	0	0	0	0	0	0	2	0
23115825|F|0-41:G>A-41:G>A	TGCAGGCTGGACGCCACGGCTCCACAGCTTGCAGATAACCCGTGGGCCAGAGGTTGAGCACCCATACTC	TGCAGGCTGGACGCCACGGCTCCACAGCTTGCAGATAACCCGTGGGCCAGAGGTTGAGCACCCATACTC	KN287291.1_scaffold-13534	70318	1	1.84E-28	41:G>A	41	1	1	0.010695	0.989305	0	0.010695	0	0.021162	0.010581	9.18936	4.5	1	0	0	0	0	0	0	0	0	0	0	0	0	0	0	0	0	0	0	0	0	0	0	0	0	0	0	0	0	0
23115834|F|0-23:G>C-23:G>C	TGCAGGCTGGATGAGTAGTGCAAGCTCTCAGACTGGCCTTGTGTTGCATGAGCGGTTCAGCAGGAATGC	TGCAGGCTGGATGAGTAGTGCAAGCTCTCAGACTGGCCTTGTGTTGCATG	KN280429.1_scaffold-3739	169593	1	3.91E-18	23:G>C	23	0.887701	0.996988	0.003012	0.996988	0.003012	0	0.006006	0.006006	0.006006	5.8867	4	1	0	0	0	0	0	0	0	0	0	-	0	1	0	0	0	0	0	0	0	0	0	0	0	0	0	0	0	0	0
23115835|F|0-27:A>G-27:A>G	TGCAGGCTGGATTGGACCCACAGACCAATCCCATGCACTGGAGCCAGCACGTATGGTCAGTCCAGCAGG	TGCAGGCTGGATTGGACCCACAGACCAATCCCATGCACTGGAGCCAGCACGTATGGTCAGTCCAGCAGG	KN293043.1_scaffold-21965	166734	1	1.84E-28	27:A>G	27	1	1	0.008021	0.991979	0	0.008021	0	0.015914	0.007957	11.82979	8	1	0	0	0	0	0	0	0	0	0	0	0	0	0	0	0	0	0	0	0	0	0	0	0	0	0	0	0	0	0
23115848|F|0-16:C>T-16:C>T	TGCAGGCTGGCAGTCTCAGCCTTTAAGGGGTTGGGGAAGTGGGAGGAGGGTCAGGCAAGGAGCACCATG	TGCAGGCTGGCAGTCTCAGCCTTTAAGGGGTTGGGGAAGTGGGAGGAGGGTCAGGCAAGGAGCACCATG	KN284594.1_scaffold-9654	100867	1	1.84E-28	16:C>T	16	0.994652	0.997312	0.067204	0.932796	0.002688	0.064516	0.005362	0.125376	0.065369	7.97645	4.78788	1	0	0	0	0	0	0	0	0	0	0	2	0	0	0	0	0	0	0	0	0	0	0	0	0	0	0	0	0	0
23115854|F|0-23:G>C-23:G>C	TGCAGGCTGGCTGCTCAAGGCTGGGGGGAGTAGGAGGAGGTCAATCAGATGTAAGGGGTACCGTATGCA	TGCAGGCTGGCTGCTCAAGGCTGGGGGGAGTAGGAGGAGGTCAATCAGATGTAAGGGGTACCGTATGCA	KN278881.1_scaffold-1547	104839	1	1.84E-28	23:G>C	23	1	0.991979	0.064171	0.935829	0.008021	0.05615	0.015914	0.120106	0.06801	10.58458	5.73077	1	0	0	0	0	0	0	0	0	0	0	0	0	0	0	0	0	0	0	0	0	0	0	0	0	0	0	0	0	0
23115855|F|0-48:G>C-48:G>C	TGCAGGCTGGGACCGGGGCTGCATTGGGCTCTTCCCAGTGCGGGGCTGGGTTGGGCTCATGGCATGAGC	TGCAGGCTGGGACCGGGGCTGCATTGGGCTCTTCCCAGTGCGGGGCTGGGTTGGGCTCATGGCATGAGC		0	0	999	48:G>C	48	0.997326	0.970509	0.160858	0.839142	0.029491	0.131367	0.057242	0.269965	0.163604	12.23246	10.04	1	0	0	0	0	0	0	0	0	0	0	0	0	0	0	0	2	0	0	0	0	0	0	0	0	0	0	0	0	0
23115864|F|0-9:G>C-9:G>C	TGCAGGCTGGGTTGGGGCCAGTATGTGCTGCACACAGCGCATAGGAATGGAGCTGACACATGCACTGCA	TGCAGGCTGGGTTGGGGCCAGTATGTGCTGCACACAGCGCATAGGAATGGAGCTGACACATGCACTGCA	KN288970.1_scaffold-15947	87598	1	1.84E-28	9:G>C	9	0.997326	1	0.069705	0.930295	0	0.069705	0	0.129693	0.064846	10.24573	6	1	0	0	0	0	0	0	0	0	0	0	0	0	0	0	0	0	0	0	0	0	0	0	0	0	0	0	0	0	0
23115869|F|0-39:G>A-39:G>A	TGCAGGCTGTCAGAGTTCCAGCCTGCAAGGGGCTGGGGGGCAGTGGAAGGCGGGGGATCAGGCAGAGAT	TGCAGGCTGTCAGAGTTCCAGCCTGCAAGGGGCTGGGGGGCAGTGGAAGGCGGGGGATCAGGCAGAGAT	KN282449.1_scaffold-6570	151688	9	1.84E-28	39:G>A	39	1	1	0.005348	0.994652	0	0.005348	0	0.010638	0.005319	7.9015	5	1	0	0	0	0	0	0	0	0	0	0	0	0	0	0	0	0	0	0	0	0	0	0	0	0	0	0	0	0	0
23115882|F|0-39:A>G-39:A>G	TGCAGGCTTCCCACCACTACATGCAATCCTGGGGGGGGGAGGGGCATGAGCGGTTCAGCAGGAATGCCG	TGCAGGCTTCCCACCACTACATGCAATCCTGGGGGGGGGAGGGGCATG		0	0	999	39:A>G	39	0.868984	1	0.003077	0.996923	0	0.003077	0	0.006135	0.003067	4.96842	3	1	0	-	0	0	0	0	0	0	0	0	0	0	0	0	0	0	0	0	0	0	0	0	0	0	0	0	0	0	0
23115886|F|0-9:C>T-9:C>T	TGCAGGCTTCGGCTCCCTGTCCTGTTGCTTCCACCCAGGGCCCCACAGCAGAGCAGAGCAGAGCAGAGC	TGCAGGCTTCGGCTCCCTGTCCTGTTGCTTCCACCCAGGGCCCCACAGCAGAGCAGAGCAGAGCAGAGC	KN282395.1_scaffold-6491	36962	1	1.84E-28	9:C>T	9	0.994652	0.994624	0.010753	0.989247	0.005376	0.005376	0.010695	0.021274	0.015985	5.97397	3	1	0	0	0	0	0	0	0	0	0	2	0	0	0	2	0	0	0	0	0	0	0	0	0	0	0	0	0	0	0
23115888|F|0-24:G>T-24:G>T	TGCAGGCTTCTAACCATACGAGGGGCCGAGTCAACAGTGACTCTGAGATCCCTTGCCACTGCTGTGTTG	TGCAGGCTTCTAACCATACGAGGGGCCGAGTCAACAGTGACTCTGAGATCCCTTGCCACTGCTGTGTTG	KN288728.1_scaffold-15605	124894	1	1.84E-28	24:G>T	24	0.991979	0.997305	0.018868	0.981132	0.002695	0.016173	0.005376	0.037024	0.0212	7.97835	4.25	1	0	0	0	0	0	0	0	0	0	0	0	0	0	0	0	0	0	0	0	0	0	0	0	0	0	0	0	0	0
23115891|F|0-39:C>T-39:C>T	TGCAGGCTTCTGACGTAAGCTGAAGTGAGTACTAAAAACCTGGAAATTCTGAAACCCAAAATACTTTCC	TGCAGGCTTCTGACGTAAGCTGAAGTGAGTACTAAAAACCTGGAAATTCTGAAACCCAAAATACTTTCC	KN281192.1_scaffold-4811	100371	1	1.84E-28	39:C>T	39	0.989305	1	0.013514	0.986486	0	0.013514	0	0.026662	0.013331	7.91613	3.83333	1	0	0	0	0	0	0	0	0	0	0	2	0	0	0	0	0	0	0	0	0	0	0	-	0	0	0	0	0	0
23115894|F|0-27:C>T-27:C>T	TGCAGGCTTGCCCGTTAGGGCTGAACACAGCAGCAGCAGCTGTGGTCCCCCTACATGCCGCGCCAAGCA	TGCAGGCTTGCCCGTTAGGGCTGAACACAGCAGCAGCAGCTGTGGTCCCCCTACATGCCGCGCCAAGCA	KN282165.1_scaffold-6176	183836	1	1.84E-28	27:C>T	27	1	1	0.082888	0.917112	0	0.082888	0	0.152035	0.076017	8.59787	6.47222	1	0	0	0	0	0	0	0	0	0	0	0	0	0	0	0	0	0	0	0	0	0	0	0	0	0	0	0	0	0
23115907|F|0-20:G>A-20:G>A	TGCAGGCTTTAACCACACAAGCCCAGGTAGGCAGAGGAGACTGAAGAGCAGCCTCAGGCTGGCAGGTTA	TGCAGGCTTTAACCACACAAGCCCAGGTAGGCAGAGGAGACTGAAGAGCAGCCTCAGGCTGGCAGGTTA	KN284853.1_scaffold-10032	3971	1	1.84E-28	20:G>A	20	0.997326	0.997319	0.034853	0.965147	0.002681	0.032172	0.005348	0.067276	0.036312	7.03632	3.70588	1	0	0	0	0	0	0	0	0	2	0	0	0	2	0	0	0	0	0	0	0	0	0	0	0	0	0	0	0	0
23115910|F|0-23:T>G-23:T>G	TGCAGGCTTTGAGTGAAGAGCTTTCCACGCCCCAGGGCAAGGCCTCCGGGCAGGCAGACCCCGTCTTTT	TGCAGGCTTTGAGTGAAGAGCTTTCCACGCCCCAGGGCAAGGCCTCCGGGCAGGCAGACCCCGTCTTTT	KN289411.1_scaffold-16592	156902	1	1.84E-28	23:T>G	23	1	1	0.002674	0.997326	0	0.002674	0	0.005333	0.002667	11.65745	3	1	0	0	0	0	0	0	0	0	0	0	0	0	0	0	0	2	0	0	0	0	0	0	0	0	0	0	0	0	0
23115912|F|0-11:C>A-11:C>A	TGCAGGCTTTGCCCCAGGCACCAAACTTCATTGTTACGGCACTGAAGGTAAGGACTGGCCTGGGAGTCT	TGCAGGCTTTGCCCCAGGCACCAAACTTCATTGTTACGGCACTGAAGGTAAGGACTGGCCTGGGAGTCT	KN286201.1_scaffold-11966	85352	1	1.84E-28	11:C>A	11	1	0.997326	0.074866	0.925134	0.002674	0.072193	0.005333	0.138523	0.071928	8.57051	4.52632	1	0	0	0	0	0	0	0	0	0	0	2	0	0	0	0	0	0	0	0	0	0	0	0	0	0	0	0	0	0
23115913|F|0-6:C>T-6:C>T	TGCAGGCTTTTAATCTGCCTAGATTTAATAATTGGGTCCTCACACATGTACTGCTTCCCAAAGCTGCTC	TGCAGGCTTTTAATCTGCCTAGATTTAATAATTGGGTCCTCACACATGTACTGCTTCCCAAAGCTGCTC	KN289638.1_scaffold-16935	45563	1	1.84E-28	6:C>T	6	0.989305	0.981081	0.151351	0.848649	0.018919	0.132432	0.037122	0.256888	0.147005	6.79956	3.75714	1	0	0	0	0	0	0	0	0	0	0	0	0	0	0	0	0	0	0	0	0	0	0	0	0	0	0	0	0	0
23115915|F|0-64:C>T-64:C>T	TGCAGGCTTTTGCCTATACCAGGACAGGGGATAGCACTGGGCTCTGCTGGTCTAGCATGTGTCACGGCC	TGCAGGCTTTTGCCTATACCAGGACAGGGGATAGCACTGGGCTCTGCTGGTCTAGCATGTGTCACGGCC	KN293053.1_scaffold-21980	88633	1	1.84E-28	64:C>T	64	1	0.983957	0.21123	0.78877	0.016043	0.195187	0.031571	0.333224	0.182397	9.32613	6.46809	1	0	0	0	0	0	0	0	0	0	0	0	2	0	0	2	0	0	0	0	0	0	0	0	0	2	2	0	0	0
23115918|F|0-65:C>G-65:C>G	TGCAGGGAAACACAGGCTGACCGTAGGCAGTCTGAGTCAGCCAATCAGGGCTGCCCTATGCACTGCTGT	TGCAGGGAAACACAGGCTGACCGTAGGCAGTCTGAGTCAGCCAATCAGGGCTGCCCTATGCACTGCTGT	KN288423.1_scaffold-15172	1517	10	8.70E-17	65:C>G	65	0.983957	0.978261	0.149457	0.850543	0.021739	0.127717	0.042533	0.254239	0.148386	7.82159	3.87692	1	0	0	0	0	0	0	0	0	0	0	0	0	2	0	0	0	0	0	0	0	0	0	0	0	0	0	0	0	0
23115920|F|0-56:A>G-56:A>G	TGCAGGGAAACAGGATGACCAGAGCAGTCTGGGTCAGTCAATCAGGGCTGCCATCTATCTCCAGACAAG	TGCAGGGAAACAGGATGACCAGAGCAGTCTGGGTCAGTCAATCAGGGCTGCCATCTATCTCCAGACAAG	KN287536.1_scaffold-13895	26417	1	1.84E-28	56:A>G	56	0.997326	0.989276	0.080429	0.919571	0.010724	0.069705	0.021218	0.14792	0.084569	7.44397	4.72973	1	0	0	0	0	0	0	0	0	0	0	0	0	0	0	0	0	0	0	0	0	0	0	0	0	0	0	0	0	0
23115927|F|0-9:A>G-9:A>G	TGCAGGGAAAGGGAGCGACCGCCAGCGCGCTCCCAGCATGAGCGGTTCAGCAGGAATGCCGAGACCGAT	TGCAGGGAAAGGGAGCGACCGCCAGCGCGCTCCCAGCATG	KN284096.1_scaffold-8939	274747	1	8.50E-13	9:A>G	9	1	1	0.026738	0.973262	0	0.026738	0	0.052046	0.026023	14.59149	5.5	1	0	0	0	0	0	0	0	0	0	2	0	0	0	0	0	0	0	0	0	0	0	0	0	0	0	0	0	0	0
23110363|F|0-27:G>T-27:G>T	TGCAGGGAACAATCCTGCAATGGATGAGATGTGACCTACTATGTTTTCTGCATGAGCGGTTCAGCAGGA	TGCAGGGAACAATCCTGCAATGGATGAGATGTGACCTACTATGTTTTCTGCATG	KN288990.1_scaffold-15978	70552	1	2.62E-20	27:G>T	27	0.909091	0.917647	0.155882	0.844118	0.082353	0.073529	0.151142	0.263166	0.207154	9.26166	6.70769	1	0	0	0	0	-	-	0	0	0	0	0	0	0	0	2	0	0	0	0	0	0	0	-	0	0	2	0	-	0
23115935|F|0-11:G>A-11:G>A	TGCAGGGAACTGCTCTCCATGCTGCCCAGATGTATTCCTGGCCACGTGCATGAGCGGTTCAGCAGGAAT	TGCAGGGAACTGCTCTCCATGCTGCCCAGATGTATTCCTGGCCACGTGCATG	KN289685.1_scaffold-17006	41821	1	3.14E-19	11:G>A	11	0.994652	1	0.010753	0.989247	0	0.010753	0	0.021274	0.010637	9.98715	5.75	1	0	0	0	0	0	0	0	0	0	0	0	0	0	0	0	0	0	0	0	0	0	0	0	0	0	0	0	0	0
23115937|F|0-32:A>G-32:A>G	TGCAGGGAAGAGCAAGCCAGGACCCCTGACCCAGGAGCACGGGGTCGGAGGAGGAGCGTGCCCAGGGGC	TGCAGGGAAGAGCAAGCCAGGACCCCTGACCCAGGAGCACGGGGTCGGAGGAGGAGCGTGCCCAGGGGC	KN291038.1_scaffold-19012	163567	1	8.58E-27	32:A>G	32	1	0.986631	0.128342	0.871658	0.013369	0.114973	0.026381	0.223741	0.125061	8.03456	3.74576	1	2	0	0	0	0	0	2	0	0	0	0	0	2	0	0	0	0	0	0	0	0	0	0	0	0	0	0	0	0
23115941|F|0-31:C>T-31:C>T	TGCAGGGAAGCTGCTTCCCTCTCCCCCATTGCACTGCACATGCAAACAGCATGAGCGGTTCAGCAGGAA	TGCAGGGAAGCTGCTTCCCTCTCCCCCATTGCACTGCACATGCAAACAGCATG	KN277890.1_scaffold-148	721465	1	9.08E-20	31:C>T	31	0.994652	0.986559	0.169355	0.830645	0.013441	0.155914	0.02652	0.281348	0.153934	12.2321	7.6875	1	0	0	0	0	2	0	0	2	1	2	0	0	2	0	0	2	0	0	1	0	0	0	2	0	2	0	2	0	2
23115953|F|0-22:A>G-22:A>G	TGCAGGGACAGCCTGAGACTGGACAAGCTCTGCTGCATGAGCGGTTCAGCAGGAATGCCGAGACCGATC	TGCAGGGACAGCCTGAGACTGGACAAGCTCTGCTGCATG		0	0	999	22:A>G	22	0.989305	0.956757	0.197297	0.802703	0.043243	0.154054	0.082747	0.316742	0.199744	10.32798	7.04819	1	0	0	0	0	0	0	0	0	0	2	0	0	0	0	0	0	0	0	0	0	0	0	0	0	0	0	0	0	0
23115958|F|0-15:C>G-15:C>G	TGCAGGGACCGGCCCCCGGAGGCTGAGCCAGGGGGCGTGGGGGGCTCCCGGTCTCCAGTGCATGAGCGG	TGCAGGGACCGGCCCCCGGAGGCTGAGCCAGGGGGCGTGGGGGGCTCCCGGTCTCCAGTGCATG	KN291574.1_scaffold-19786	21005	1	9.81E-26	15:C>G	15	0.986631	0.99729	0.02439	0.97561	0.00271	0.02168	0.005405	0.047591	0.026498	10.16122	8.45455	1	0	0	0	0	0	0	0	0	0	0	0	0	0	0	0	0	0	0	0	0	0	0	0	0	0	0	0	0	0
23115971|F|0-55:T>C-55:T>C	TGCAGGGACTGTGGTGAGTGGGTTGGGCTTTCCTAGCCTCAGGGCTGTGCTGTGATTGCATGAGCGGTT	TGCAGGGACTGTGGTGAGTGGGTTGGGCTTTCCTAGCCTCAGGGCTGTGCTGTGATTGCATG	KN283302.1_scaffold-7815	78336	1	1.20E-24	55:T>C	55	1	1	0.008021	0.991979	0	0.008021	0	0.015914	0.007957	9.98936	3.25	1	0	0	0	0	0	2	0	0	0	0	0	0	0	0	0	0	0	0	0	0	0	0	0	0	0	0	0	0	0
23115981|F|0-16:C>A-16:C>A	TGCAGGGAGAGACCCCCAGACCAGCTTCACCTGGATTGGGAGCATGAGCGGTTCAGCAGGAATGCCGAG	TGCAGGGAGAGACCCCCAGACCAGCTTCACCTGGATTGGGAGCATG	KN280121.1_scaffold-3322	6613	1	5.50E-16	16:C>A	16	0.994652	1	0.010753	0.989247	0	0.010753	0	0.021274	0.010637	10.72377	5	1	0	0	0	0	0	0	0	0	0	0	0	0	0	0	0	0	0	0	0	0	0	0	0	0	0	0	0	0	0
23115999|F|0-22:T>C-22:T>C	TGCAGGGAGCTGCTTTCCATGCTGCCTGGCTGCATTTCTGGCTACATGCATGAGCGGTTCAGCAGGAAT	TGCAGGGAGCTGCTTTCCATGCTGCCTGGCTGCATTTCTGGCTACATGCATG	KN282282.1_scaffold-6336	20325	1	3.14E-19	22:T>C	22	0.986631	1	0.00271	0.99729	0	0.00271	0	0.005405	0.002703	9.18696	3	1	0	0	0	0	0	0	0	0	0	0	0	0	0	0	0	0	0	0	0	0	0	0	0	0	0	0	0	0	0
23116002|F|0-21:G>A-21:G>A	TGCAGGGAGCTGGGAGGGAGTGGGAGGAGGGCAATCAGGCAGGGGGCACCATGTGCATGAGCGGTTCAG	TGCAGGGAGCTGGGAGGGAGTGGGAGGAGGGCAATCAGGCAGGGGGCACCATGTGCATG	KN290354.1_scaffold-17991	19659	9	5.12E-23	21:G>A	21	1	1	0.002674	0.997326	0	0.002674	0	0.005333	0.002667	9.34328	3	1	0	0	0	0	0	0	0	0	0	0	0	0	0	0	0	0	0	0	0	0	0	0	0	0	0	0	0	0	0
23116004|F|0-37:G>A-37:G>A	TGCAGGGAGCTGTGAGAGCTGCTATCCAGGCTGCCTGGCAGCCATGTGCATGAGCGGTTCAGCAGGAAT	TGCAGGGAGCTGTGAGAGCTGCTATCCAGGCTGCCTGGCAGCCATGTGCATG	KN291683.1_scaffold-19944	161869	7	3.14E-19	37:G>A	37	1	1	0.008021	0.991979	0	0.008021	0	0.015914	0.007957	8.58155	3	1	0	0	0	0	0	0	0	0	0	0	2	0	0	0	0	0	0	0	0	0	0	0	0	0	0	0	0	0	0
23116009|F|0-8:G>A-8:G>A	TGCAGGGAGGAAGTCCTACAATCCCAGAGACAGTGACCTGAGGGTAACTGTTGCTTCTTTAAATGTCGG	TGCAGGGAGGAAGTCCTACAATCCCAGAGACAGTGACCTGAGGGTAACTGTTGCTTCTTTAAATGTCGG	KN291769.1_scaffold-20071	70285	1	1.84E-28	8:G>A	8	0.989305	1	0.02973	0.97027	0	0.02973	0	0.057692	0.028846	7.1987	4.92857	1	0	0	0	0	0	0	0	0	0	0	0	0	0	0	0	0	0	0	0	0	0	0	0	0	0	0	0	0	0
23116013|F|0-10:C>T-10:C>T	TGCAGGGAGGCTGGTGGCCGTGCAGTGCCTGCCTGGGCTGAGGGGAGAAGCCCAGGCCCAGGGACAGCA	TGCAGGGAGGCTGGTGGCCGTGCAGTGCCTGCCTGGGCTGAGGGGAGAAGCCCAGGCCCAGGGACAGCA	KN282739.1_scaffold-6995	123200	1	1.84E-28	10:C>T	10	0.941176	0.997159	0.051136	0.948864	0.002841	0.048295	0.005666	0.097043	0.051354	7.19258	4.16	1	0	0	0	-	0	-	0	0	0	0	0	0	0	0	-	0	0	0	0	0	0	0	0	0	0	0	0	0	0
23116025|F|0-23:A>G-23:A>G	TGCAGGGAGGTTGCACAGGGAACAGGCTTTGTCAGGGACAGCAGAGATAGTGGGGAGGTTCCCCCTGTA	TGCAGGGAGGTTGCACAGGGAACAGGCTTTGTCAGGGACAGCAGAGATAGTGGGGAGGTTCCCCCTGTA	KN290492.1_scaffold-18196	17930	1	1.84E-28	23:A>G	23	0.986631	1	0.00271	0.99729	0	0.00271	0	0.005405	0.002703	7.34279	3	1	0	0	0	0	0	0	0	0	0	0	0	0	0	0	0	0	0	0	0	0	0	0	0	0	0	0	0	0	0
23116027|F|0-23:G>C-23:G>C	TGCAGGGAGTCGCATGTCATTGGGCTGGGCAGTCTCTGTGCTGCGACATGCAGCTCCCGGCACTGCTGC	TGCAGGGAGTCGCATGTCATTGGGCTGGGCAGTCTCTGTGCTGCGACATGCAGCTCCCGGCACTGCTGC	KN281502.1_scaffold-5250	247393	1	1.84E-28	23:G>C	23	0.994652	1	0.002688	0.997312	0	0.002688	0	0.005362	0.002681	5.91304	4	1	0	0	0	0	0	0	0	0	0	0	0	0	0	0	-	0	0	0	0	0	0	0	0	0	0	0	0	0	0
23116043|F|0-48:A>G-48:A>G	TGCAGGGATCTGCTGTCCATGCTGCCTGGCTGTCTCCTGGCCTCGTGCATGTGGGGGCATGAGCGGTTC	TGCAGGGATCTGCTGTCCATGCTGCCTGGCTGTCTCCTGGCCTCGTGCATGTGGGGGCATG	KN282286.1_scaffold-6340	242006	1	1.95E-22	48:A>G	48	0.997326	0.018767	0.994638	0.005362	0.981233	0.013405	0.036829	0.010666	0.023748	6.75	6.91685	1	1	1	1	1	1	1	1	1	1	1	1	1	2	1	1	1	1	1	1	1	1	1	1	1	1	1	1	1	1
23116051|F|0-40:G>C-40:G>C	TGCAGGGATGTGGCCACTTTGAGAGAGAACCAGGGAGGAAGGGGCTCCCTCCAGCATGAGCGGTTCAGC	TGCAGGGATGTGGCCACTTTGAGAGAGAACCAGGGAGGAAGGGGCTCCCTCCAGCATG	KN286315.1_scaffold-12126	465159	1	1.79E-22	40:G>C	40	1	1	0.002674	0.997326	0	0.002674	0	0.005333	0.002667	9.29638	3	1	0	0	0	0	0	0	0	0	0	0	0	0	0	0	0	0	0	0	0	0	0	0	0	0	0	0	0	2	0
23116053|F|0-21:G>C-21:G>C	TGCAGGGATGTTCATGCATGTGTGAGTGCATATATGTGTGTATATACCCATGTGCATGAGCGGTTCAGC	TGCAGGGATGTTCATGCATGTGTGAGTGCATATATGTGTGTATATACCCATGTGCATG	KN277831.1_scaffold-73	1006425	1	1.79E-22	21:G>C	21	0.994652	0.817204	0.561828	0.438172	0.182796	0.379032	0.298763	0.492355	0.395559	7.14698	5.88417	1	2	0	1	1	2	0	0	2	0	2	1	2	0	0	1	0	2	2	0	2	2	1	2	0	2	1	0	0	0
23110525|F|0-11:A>G-11:A>G	TGCAGGGATTAAAGGAAAAACTGTGATGCCTATAATGCAACTGAGTGGTGGATTTCTGCTGATTTGTAA	TGCAGGGATTAAAGGAAAAACTGTGATGCCTATAATGCAACTGAGTGGTGGATTTCTGCTGATTTGTAA	KN291287.1_scaffold-19386	182940	1	3.99E-25	11:A>G	11	0.430481	0.869565	0.192547	0.807453	0.130435	0.062112	0.226843	0.310945	0.268894	4.77095	4.15789	1	-	0	-	0	0	0	-	0	-	0	-	-	0	-	-	0	0	0	-	-	-	-	-	-	0	-	0	-	-
23116062|F|0-18:A>C-18:A>C	TGCAGGGCAACTGTGAAGATCAACATTTGAAGCATGAGCGGTTCAGCAGGAATGCCGAGACCGATCTCG	TGCAGGGCAACTGTGAAGATCAACATTTGAAGCATG	KN286975.1_scaffold-13098	180171	1	1.04E-10	18:A>C	18	0.97861	1	0.013661	0.986339	0	0.013661	0	0.026949	0.013475	12.2035	7.2	1	0	0	0	0	0	0	0	0	0	0	0	0	0	0	0	0	0	0	0	0	0	0	0	0	0	0	0	0	0
23116066|F|0-30:A>G-30:A>G	TGCAGGGCACACAGGCTCCAGGCTGGGTGCAGGTGCTGACTGCCTCAGCAGGATGCATGAGCGGTTCAG	TGCAGGGCACACAGGCTCCAGGCTGGGTGCAGGTGCTGACTGCCTCAGCAGGATGCATG	KN283182.1_scaffold-7636	1678	1	2.38E-21	30:A>G	30	1	1	0.050802	0.949198	0	0.050802	0	0.096443	0.048221	13.02553	7.26087	1	0	0	0	0	0	0	0	0	0	0	0	0	0	0	0	0	0	0	0	0	0	0	0	0	0	0	0	0	0
23116079|F|0-12:G>C-12:G>C	TGCAGGGCAGCAGAGTTCCAGCCTGCAAAGGACTGGTGGGGGGAACAGAAGGAGGTGAGGCAGGGGCCC	TGCAGGGCAGCAGAGTTCCAGCCTGCAAAGGACTGGTGGGGGGAACAGAAGGAGGTGAGGCAGGGGCCC	KN291500.1_scaffold-19679	174365	1	1.84E-28	12:G>C	12	0.991979	0.994609	0.02965	0.97035	0.005391	0.024259	0.010724	0.057541	0.034132	6.67896	4.76923	1	0	0	0	0	0	0	0	0	0	0	2	0	0	0	0	0	0	0	0	0	0	0	0	0	0	0	0	0	0
23116080|F|0-44:C>T-44:C>T	TGCAGGGCAGCCCTTCCGATCCCTTCATGTAAGTACAATTTTAACGCTGTTACATCCTTCCCTGCATTG	TGCAGGGCAGCCCTTCCGATCCCTTCATGTAAGTACAATTTTAACGCTGTTACATCCTTCCCTGCATTG	KN290041.1_scaffold-17531	508594	1	1.84E-28	44:C>T	44	0.983957	1	0.002717	0.997283	0	0.002717	0	0.00542	0.00271	5.82826	4	1	0	0	0	0	0	0	0	0	0	0	0	0	0	0	0	0	0	0	0	0	0	0	-	0	0	0	0	2	0
23116081|F|0-16:C>A-16:C>A	TGCAGGGCAGCCTGCCCTTGCCCCATGCACACATCTGGAGGGGCACATGCTCCCCCATGCTTGACCAGG	TGCAGGGCAGCCTGCCCTTGCCCCATGCACACATCTGGAGGGGCACATGCTCCCCCATGCTTGACCAGG	KN286536.1_scaffold-12456	41140	2	1.84E-28	16:C>A	16	1	1	0.010695	0.989305	0	0.010695	0	0.021162	0.010581	6.50855	2.75	1	0	0	0	0	0	0	0	0	0	0	0	0	0	0	0	0	0	0	0	0	0	0	0	0	0	0	0	0	0
23116088|F|0-35:G>C-35:G>C	TGCAGGGCAGTGCCCAGAGCTGTGTGGCCGGCCTCGGGACAGCAGCAGTGTGGTGGTGGCCAAGCAGCA	TGCAGGGCAGTGCCCAGAGCTGTGTGGCCGGCCTCGGGACAGCAGCAGTGTGGTGGTGGCCAAGCAGCA	KN278315.1_scaffold-738	315062	1	1.84E-28	35:G>C	35	1	1	0.064171	0.935829	0	0.064171	0	0.120106	0.060053	11.7617	5.33333	1	0	0	0	0	0	0	0	0	0	0	0	0	0	0	0	0	0	0	0	0	0	0	0	0	0	0	0	0	0
23116090|F|0-23:C>A-23:C>A	TGCAGGGCAGTTGGGAGTTTCCTCAGGCCAGAAACCTCCCCAGGTTTGGAGGCATGAGCGGTTCAGCAG	TGCAGGGCAGTTGGGAGTTTCCTCAGGCCAGAAACCTCCCCAGGTTTGGAGGCATG	KN277913.1_scaffold-179	462994	1	2.17E-21	23:C>A	23	0.938503	0.997151	0.011396	0.988604	0.002849	0.008547	0.005682	0.022532	0.014107	6.72406	4	1	0	0	0	0	-	0	0	0	0	0	0	0	0	0	0	0	0	0	0	0	0	0	0	0	0	-	0	-	0
23116094|F|0-14:G>A-14:G>A	TGCAGGGCATGTGGGCTCTGGGCTGTTGCAGGGTGAGGGCAGGTGCTGACCGGATCAAGGGGGTGCATG	TGCAGGGCATGTGGGCTCTGGGCTGTTGCAGGGTGAGGGCAGGTGCTGACCGGATCAAGGGGGTGCATG	KN292472.1_scaffold-21114	13615	4	1.84E-28	14:G>A	14	1	0.994652	0.088235	0.911765	0.005348	0.082888	0.010638	0.1609	0.085769	10.4594	5.4	1	0	2	0	0	2	0	0	0	0	0	0	0	0	0	0	0	0	0	0	0	0	0	0	0	2	0	0	0	0
23116104|F|0-24:G>A-24:G>A	TGCAGGGCCAGGGAGAGACACAGAGAGTGCGAGTGTGGAGTGCGGTGGTGGTGGTGGTAGGGTACTCAC	TGCAGGGCCAGGGAGAGACACAGAGAGTGCGAGTGTGGAGTGCGGTGGTGGTGGTGGTAGGGTACTCAC	KN285193.1_scaffold-10495	383048	1	1.84E-28	24:G>A	24	0.983957	1	0.008152	0.991848	0	0.008152	0	0.016171	0.008086	6.41921	3	1	0	0	0	0	0	0	0	2	0	0	0	0	0	0	0	0	0	0	0	0	0	0	0	0	0	0	0	0	0
23116109|F|0-33:G>C-33:G>C	TGCAGGGCCCCATAGGCTTCCAGGGGTCGACCTGGTGGCTGCAATGCCCCACTTGGTTGCCAGGGGTTG	TGCAGGGCCCCATAGGCTTCCAGGGGTCGACCTGGTGGCTGCAATGCCCCACTTGGTTGCCAGGGGTTG		0	0	999	33:G>C	33	0.957219	1	0.002793	0.997207	0	0.002793	0	0.005571	0.002785	4.32794	3	1	0	0	0	-	0	0	0	0	0	0	0	0	0	0	0	0	0	0	0	0	0	0	0	0	0	0	0	0	0
23118569|F|0-53:C>T-53:C>T	TGCAGGGCCCTTAAGATTTCCAGCTTTGGTGAACAGACCAAATTAGGAGAAACCAGTAAAAGCCCAAAT	TGCAGGGCCCTTAAGATTTCCAGCTTTGGTGAACAGACCAAATTAGGAGAAACCAGTAAAAGCCCAAAT	KN278722.1_scaffold-1320	156120	6	1.84E-28	53:C>T	53	0.914439	0.994152	0.01462	0.98538	0.005848	0.008772	0.011628	0.028812	0.02022	4.32452	4.25	1	0	0	0	-	0	0	-	0	-	0	0	0	2	0	0	0	0	0	0	0	0	0	0	0	0	0	0	-	0
23116117|F|0-12:C>T-12:C>T	TGCAGGGCCTGACGTGGGACAACGTGGTGGGGGGAGGAGCGGACCAGACACGAGTTGGGGGAATAGTAG	TGCAGGGCCTGACGTGGGACAACGTGGTGGGGGGAGGAGCGGACCAGACACGAGTTGGGGGAATAGTAG		0	0	999	12:C>T	12	1	1	0.066845	0.933155	0	0.066845	0	0.124753	0.062377	9.79957	5.17241	1	0	0	0	0	0	0	0	0	0	0	0	0	0	0	0	0	0	0	0	0	2	0	0	0	0	0	2	0	2
23116118|F|0-20:T>C-20:T>C	TGCAGGGCCTGGACTTCTCTTAACCATCTCAGAATGGGTGCTGGAAAGTTTGAGGCAAGCATGAGCGGT	TGCAGGGCCTGGACTTCTCTTAACCATCTCAGAATGGGTGCTGGAAAGTTTGAGGCAAGCATG	KN279103.1_scaffold-1859	20427	1	3.43E-25	20:T>C	20	0.986631	0.99729	0.01897	0.98103	0.00271	0.01626	0.005405	0.037221	0.021313	7.15721	4.28571	1	0	0	0	0	0	0	0	0	0	0	0	0	0	0	0	0	0	0	0	0	0	0	0	0	0	0	0	0	0
23116121|F|0-21:C>T-21:C>T	TGCAGGGCCTTGCCCTTTATGCAGCACTGGCACGCTGACCAGTTGTGCCCATGCTCCTGCATGAGCGGT	TGCAGGGCCTTGCCCTTTATGCAGCACTGGCACGCTGACCAGTTGTGCCCATGCTCCTGCATG	KN279191.1_scaffold-1973	218920	2	3.43E-25	21:C>T	21	0.970588	0.99449	0.07438	0.92562	0.00551	0.068871	0.010959	0.137696	0.074327	6.88764	3.09677	1	0	0	0	0	0	1	2	0	0	0	2	0	0	0	0	0	0	0	0	0	0	0	0	0	0	0	0	-	0
23116132|F|0-33:C>T-33:C>T	TGCAGGGCTATGACAAACTCCTCCCTGGGGGCACGGGCCCCCAGATCTGCATGAGCGGTTCAGCAGGAA	TGCAGGGCTATGACAAACTCCTCCCTGGGGGCACGGGCCCCCAGATCTGCATG	KN285589.1_scaffold-11071	129620	1	9.08E-20	33:C>T	33	0.868984	1	0.003077	0.996923	0	0.003077	0	0.006135	0.003067	7.64249	4	1	0	0	0	0	0	0	0	0	0	0	0	0	0	0	-	0	0	0	0	0	0	0	0	0	0	0	-	-	0
23116136|F|0-24:C>A-24:C>A	TGCAGGGCTCGGTCCTCGGGCCCGCGCTGCTCAGCATCATCAGTGACTTGGACGAAGGGGTAAAAAGCA	TGCAGGGCTCGGTCCTCGGGCCCGCGCTGCTCAGCATCATCAGTGACTTGGACGAAGGGGTAAAAAGCA	KN280552.1_scaffold-3912	58448	10	1.84E-28	24:C>A	24	0.975936	1	0.00274	0.99726	0	0.00274	0	0.005464	0.002732	4.76275	3	1	0	0	0	0	0	0	0	0	0	0	0	0	0	0	0	0	0	0	0	0	-	0	0	0	0	0	0	0	0
23116146|F|0-23:T>G-23:T>G	TGCAGGGCTGATAGCTGCTCTTTTGCTTGGGGGAAACCTGGGCTGATAGTTGCTCTTTTGTTCTGCATG	TGCAGGGCTGATAGCTGCTCTTTTGCTTGGGGGAAACCTGGGCTGATAGTTGCTCTTTTGTTCTGCATG	KN280190.1_scaffold-3420	67596	1	1.84E-28	23:T>G	23	0.97861	1	0.002732	0.997268	0	0.002732	0	0.00545	0.002725	6.95228	3	1	0	0	0	0	0	0	0	0	0	0	0	0	0	0	0	0	0	0	0	0	0	0	0	0	0	0	0	0	0
23116148|F|0-32:A>G-32:A>G	TGCAGGGCTGCGTGAAGCACCTGCCACAGTCGAGGCAGCCGTACGGACGCTCCCCGGAGTGGATGCGCC	TGCAGGGCTGCGTGAAGCACCTGCCACAGTCGAGGCAGCCGTACGGACGCTCCCCGGAGTGGATGCGCC	KN284229.1_scaffold-9127	4257	1	1.84E-28	32:A>G	32	0.983957	0.991848	0.040761	0.959239	0.008152	0.032609	0.016171	0.078199	0.047185	7.29888	3.22222	1	0	0	0	0	0	0	0	0	0	0	0	0	0	0	0	0	0	0	0	0	0	0	0	0	0	0	0	-	0
23116175|F|0-27:G>A-27:G>A	TGCAGGGGAAACTTGGGATAACGATTCGATACCTGATCCCACAACCATGTCTCCTGCCATGAACAGGTA	TGCAGGGGAAACTTGGGATAACGATTCGATACCTGATCCCACAACCATGTCTCCTGCCATGAACAGGTA	KN288014.1_scaffold-14588	74117	1	1.84E-28	27:G>A	27	0.997326	0.962466	0.246649	0.753351	0.037534	0.209115	0.072249	0.371626	0.221938	10.09641	6.75214	1	0	0	0	0	2	0	0	0	2	0	0	0	0	2	0	0	2	2	0	0	2	0	0	2	2	0	0	0	0
23116178|F|0-31:G>A-31:G>A	TGCAGGGGAACCACTCTCCCATTTTTCCCTGGTGCCTAAGAAAAGGTACTTCTGGCATGAGCGGTTCAG	TGCAGGGGAACCACTCTCCCATTTTTCCCTGGTGCCTAAGAAAAGGTACTTCTGGCATG	KN282135.1_scaffold-6133	119918	1	5.12E-23	31:G>A	31	0.983957	1	0.01087	0.98913	0	0.01087	0	0.021503	0.010751	7.29258	3.6	1	0	0	0	0	0	0	0	0	0	0	0	0	0	0	0	0	0	0	0	0	0	0	0	0	0	0	0	0	0
23116182|F|0-41:C>T-41:C>T	TGCAGGGGAAGGGCTCCAGGATCTCTCCCCCCACAGCAGCACAGGCCAGGCAGCAGCATGAGCGGTTCA	TGCAGGGGAAGGGCTCCAGGATCTCTCCCCCCACAGCAGCACAGGCCAGGCAGCAGCATG	KN291406.1_scaffold-19546	127281	1	1.47E-23	41:C>T	41	1	0.92246	0.40107	0.59893	0.07754	0.323529	0.143055	0.480426	0.31174	9.53226	6.61579	1	0	0	2	0	0	2	0	2	2	0	0	0	0	2	0	0	2	2	0	0	0	2	1	2	0	0	0	0	2
23116183|F|0-35:C>A-35:C>A	TGCAGGGGAAGGGCTCCAGGGTCTGTGCAACCTATCTCTTGTGACATCTAAGTTTTTACCATTGCCATT	TGCAGGGGAAGGGCTCCAGGGTCTGTGCAACCTATCTCTTGTGACATCTAAGTTTTTACCATTGCCATT	KN280602.1_scaffold-3977	169595	1	1.84E-28	35:C>A	35	0.989305	0.997297	0.002703	0.997297	0.002703	0	0.005391	0.005391	0.005391	4.64978	3	1	0	0	0	0	0	0	0	0	0	0	0	0	0	0	0	0	0	0	0	0	0	0	0	0	0	1	0	0	0
23116184|F|0-20:C>T-20:C>T	TGCAGGGGAAGGGGCGCTCCCCAGTGTGCACACGCAGATGCTCCTTCAGATCTGTGGCACGCCTGAAGC	TGCAGGGGAAGGGGCGCTCCCCAGTGTGCACACGCAGATGCTCCTTCAGATCTGTGGCACGCCTGAAGC	KN278126.1_scaffold-480	102131	1	1.84E-28	20:C>T	20	1	1	0.002674	0.997326	0	0.002674	0	0.005333	0.002667	10.28145	3	1	0	0	0	0	0	0	0	0	0	0	0	0	0	0	0	0	0	0	0	0	0	0	0	0	0	0	0	0	0
23116187|F|0-15:T>G-15:T>G	TGCAGGGGACACAGGTCAGGGCAGGTAGGCAAGGTCTCCATGGAGACTGGATGGGACCCCTGTGGGTAG	TGCAGGGGACACAGGTCAGGGCAGGTAGGCAAGGTCTCCATGGAGACTGGATGGGACCCCTGTGGGTAG	KN287310.1_scaffold-13561	138931	1	1.84E-28	15:T>G	15	0.986631	1	0.0271	0.9729	0	0.0271	0	0.052732	0.026366	6.20996	3	1	0	0	0	0	0	0	0	0	0	0	0	0	0	0	0	0	0	0	0	0	0	0	0	0	0	0	0	0	0
23118570|F|0-18:C>T-18:C>T	TGCAGGGGACCCAGGAGACACCAGTGGTCAAGCCAGGGGGAACACAGAGGGGCCCCCCAGCATGAGCGG	TGCAGGGGACCCAGGAGACACCAGTGGTCAAGCCAGGGGGAACACAGAGGGGCCCCCCAGCATG	KN283346.1_scaffold-7874	147548	1	9.81E-26	18:C>T	18	0.97861	1	0.005464	0.994536	0	0.005464	0	0.010869	0.005435	7.1048	4	1	0	0	0	0	0	0	0	0	0	0	0	0	0	0	0	0	0	0	0	0	0	0	0	0	0	0	0	0	0
23116196|F|0-32:T>A-32:T>A	TGCAGGGGAGATGGTAAGGGGTTGTGGGCATGTGGCAGGCAGTCAGTTGGGTAGCTGAGCTGGGCTTGC	TGCAGGGGAGATGGTAAGGGGTTGTGGGCATGTGGCAGGCAGTCAGTTGGGTAGCTGAGCTGGGCTTGC	KN283132.1_scaffold-7576	143848	1	1.84E-28	32:T>A	32	0.983957	0.997283	0.040761	0.959239	0.002717	0.038043	0.00542	0.078199	0.041809	4.79956	3	1	0	0	0	0	0	0	0	0	0	0	0	0	0	0	0	0	0	0	0	0	0	0	0	0	0	0	0	-	0
23116201|F|0-27:C>T-27:C>T	TGCAGGGGAGCTCCCCACTTGCTGCTGCCATGCTCCTGCCACCAGTAGTGCCGACACCAGCGGGAGCTC	TGCAGGGGAGCTCCCCACTTGCTGCTGCCATGCTCCTGCCACCAGTAGTGCCGACACCAGCGGGAGCTC	KN284135.1_scaffold-8987	180566	1	1.84E-28	27:C>T	27	0.994652	0.978495	0.077957	0.922043	0.021505	0.056452	0.042086	0.143759	0.092923	5.06858	3.26471	1	0	0	0	0	0	0	0	0	0	0	0	0	0	0	0	0	0	0	0	0	0	0	0	0	0	0	0	-	0
23116210|F|0-17:C>T-17:C>T	TGCAGGGGCAAATGAGCCACCCCTGTGCTCAGACCACATAATAGGCCTGGCTGGCTGGAAAGGGAGGGA	TGCAGGGGCAAATGAGCCACCCCTGTGCTCAGACCACATAATAGGCCTGGCTGGCTGGAAAGGGAGGGA	KN293732.1_scaffold-23003	175893	1	1.84E-28	17:C>T	17	0.917112	0.997085	0.002915	0.997085	0.002915	0	0.005814	0.005814	0.005814	3.54545	3	1	0	-	0	-	-	0	0	0	0	0	0	0	0	0	-	0	0	0	0	0	0	0	0	0	0	0	0	-	0
23116211|F|0-53:A>G-53:A>G	TGCAGGGGCACACGGCTCCGCCACCACTTCTGCTGGCTGGTGCCGACCTGGGCAGGTCTGTCCCATCCG	TGCAGGGGCACACGGCTCCGCCACCACTTCTGCTGGCTGGTGCCGACCTGGGCAGGTCTGTCCCATCCG	KN286763.1_scaffold-12793	59927	10	1.84E-28	53:A>G	53	1	0.994652	0.045455	0.954545	0.005348	0.040107	0.010638	0.086777	0.048707	8.72103	3.1	1	0	0	0	0	0	0	0	0	0	0	0	0	0	0	0	0	0	0	0	0	0	0	0	0	0	0	0	0	0
23116212|F|0-43:G>T-43:G>T	TGCAGGGGCACAGGCCACTCAATAAAGTTTTGCACTGTGTCCTGCTTCTCTGCATGAGCGGTTCAGCAG	TGCAGGGGCACAGGCCACTCAATAAAGTTTTGCACTGTGTCCTGCTTCTCTGCATG	KN282747.1_scaffold-7006	489676	3	2.17E-21	43:G>T	43	0.983957	0.991848	0.019022	0.980978	0.008152	0.01087	0.016171	0.03732	0.026746	8.47439	5.22222	1	0	0	0	0	0	0	0	0	0	0	0	0	0	0	0	0	0	0	0	0	0	0	0	0	0	0	-	0	0
23116215|F|0-20:A>T-20:A>T	TGCAGGGGCACGGCAGGAACAGCCTACAGCTTGAGATGCATGAGCGGTTCAGCAGGAATGCCGAGACCG	TGCAGGGGCACGGCAGGAACAGCCTACAGCTTGAGATGCATG	KN278307.1_scaffold-723	19520	1	7.45E-14	20:A>T	20	0.986631	1	0.00271	0.99729	0	0.00271	0	0.005405	0.002703	11.02603	3	1	0	0	0	0	0	0	0	0	0	0	0	0	0	0	0	0	0	0	0	0	0	0	0	0	0	0	0	0	-
23116221|F|0-20:G>C-20:G>C	TGCAGGGGCAGGAGAAGGGAGATAAGGCAAGGGGAGCTACTCTCATGCTGCATGGCTGCCATAAGCATG	TGCAGGGGCAGGAGAAGGGAGATAAGGCAAGGGGAGCTACTCTCATGCTGCATGGCTGCCATAAGCATG	KN290481.1_scaffold-18177	136732	1	1.84E-28	20:G>C	20	0.997326	1	0.032172	0.967828	0	0.032172	0	0.062273	0.031137	8.00214	4.64286	1	0	0	0	0	0	0	0	0	0	0	0	0	0	0	0	0	0	0	0	0	0	0	0	0	0	0	0	0	0
23116223|F|0-21:A>C-21:A>C	TGCAGGGGCAGTCGGTGTCGAATAGCTGTTGCATGTTACATGACCACCATTGCATGAGCGGTTCAGCAG	TGCAGGGGCAGTCGGTGTCGAATAGCTGTTGCATGTTACATGACCACCATTGCATG	JRXG01011638.1_scaffold-2160_1	12384	1	2.17E-21	21:A>C	21	0.997326	1	0.002681	0.997319	0	0.002681	0	0.005348	0.002674	10.5803	3	1	0	0	0	0	0	0	0	0	0	0	0	0	0	0	0	0	0	0	0	0	0	0	0	0	0	0	0	0	0
23116227|F|0-18:A>G-18:A>G	TGCAGGGGCATGTGGCACATACCCACCTGGCCAGTGATAGCCAAAGTGCATGGGCTTGCAGTAGCCCTT	TGCAGGGGCATGTGGCACATACCCACCTGGCCAGTGATAGCCAAAGTGCATGGGCTTGCAGTAGCCCTT	KN293457.1_scaffold-22582	225119	1	1.84E-28	18:A>G	18	0.989305	0.997297	0.018919	0.981081	0.002703	0.016216	0.005391	0.037122	0.021256	6.3087	3	1	0	0	0	0	0	0	0	2	0	0	0	0	0	0	0	2	0	0	0	0	0	0	0	0	0	0	0	0	0
23116234|F|0-66:C>T-66:C>T	TGCAGGGGCCTCAATCTAGCCCCTGCCCCTTCCCTCCCCCCTGGACTGATCTGCCAGGCTGGGGCACGT	TGCAGGGGCCTCAATCTAGCCCCTGCCCCTTCCCTCCCCCCTGGACTGATCTGCCAGGCTGGGGCACGT		0	0	999	66:C>T	66	0.997326	1	0.029491	0.970509	0	0.029491	0	0.057242	0.028621	7.17735	3.81818	1	0	-	0	0	0	0	0	0	0	0	0	0	0	0	0	0	0	0	0	0	0	0	0	0	0	0	0	0	0
23116245|F|0-7:G>A-7:G>A	TGCAGGGGCCTTGATCTAGCCTCTGCCCTTTCTCTCCCTCACAACTGACCTGCTGGGCTGGGGCGTGTG	TGCAGGGGCCTTGATCTAGCCTCTGCCCTTTCTCTCCCTCACAACTGACCTGCTGGGCTGGGGCGTGTG	KN280279.1_scaffold-3537	180065	1	1.84E-28	7:G>A	7	1	1	0.05615	0.94385	0	0.05615	0	0.105994	0.052997	8.31557	3.70833	1	0	0	0	0	0	0	0	0	0	0	0	0	0	0	0	0	0	0	0	0	0	0	0	0	0	0	0	0	0
23116258|F|0-41:C>T-41:C>T	TGCAGGGGCTGGGACTTGTTCTCTGATGCCCAGATCTTCACCTTAGTCAGCATGAGCGGTTCAGCAGGA	TGCAGGGGCTGGGACTTGTTCTCTGATGCCCAGATCTTCACCTTAGTCAGCATG	KN282035.1_scaffold-5991	334093	1	2.62E-20	41:C>T	41	0.989305	0.997297	0.005405	0.994595	0.002703	0.002703	0.005391	0.010752	0.008072	8.01313	3	1	0	0	0	0	0	0	0	0	0	0	0	0	0	0	0	0	0	0	0	0	0	0	0	0	0	0	0	0	0
23116262|F|0-45:G>T-45:G>T	TGCAGGGGCTTCAAGCCAACCACCATTTTAACAGATGGGGCTCCAGACTACAGGGAGCAGATCAGGCCA	TGCAGGGGCTTCAAGCCAACCACCATTTTAACAGATGGGGCTCCAGACTACAGGGAGCAGATCAGGCCA	KN278679.1_scaffold-1267	63912	1	1.84E-28	45:G>T	45	0.975936	1	0.00274	0.99726	0	0.00274	0	0.005464	0.002732	5.56793	3	1	0	0	0	0	0	0	0	0	0	0	0	0	0	0	0	0	0	0	0	0	0	0	0	0	0	0	0	0	0
23116273|F|0-20:G>A-20:G>A	TGCAGGGGGACCCTGGGTACGGCTCCCAGATCCAGGAGGCACCAGTCACCGAGCCAGGGGGACGTGGTG	TGCAGGGGGACCCTGGGTACGGCTCCCAGATCCAGGAGGCACCAGTCACCGAGCCAGGGGGACGTGGTG	KN290122.1_scaffold-17654	64065	8	1.84E-28	20:G>A	20	1	1	0.002674	0.997326	0	0.002674	0	0.005333	0.002667	8.40213	3	1	0	0	0	2	0	0	0	0	0	0	0	0	0	0	0	0	0	0	0	0	0	0	0	0	0	0	0	0	0
23116282|F|0-5:G>C-5:G>C	TGCAGGGGGATATTCCCTCGCCTTTGCTTGTGTGAATCTAGTACTCCCCACTGCATGAGCGGTTCAGCA	TGCAGGGGGATATTCCCTCGCCTTTGCTTGTGTGAATCTAGTACTCCCCACTGCATG	KN283021.1_scaffold-7418	10310	1	6.23E-22	5:G>C	5	0.983957	0.997283	0.013587	0.986413	0.002717	0.01087	0.00542	0.026805	0.016112	7.03043	4.8	1	0	0	0	0	0	0	0	0	0	0	0	0	0	0	0	0	0	0	0	0	0	0	0	0	0	0	0	0	0
23116293|F|0-61:G>A-61:G>A	TGCAGGGGGCGTTGCATAACAATCCACCCCTTGATCTCTTTGTATTAAATTACAGCAGGGGGCACCTAT	TGCAGGGGGCGTTGCATAACAATCCACCCCTTGATCTCTTTGTATTAAATTACAGCAGGGGGCACCTAT	KN281406.1_scaffold-5119	122416	3	1.84E-28	61:G>A	61	0.983957	0.997283	0.035326	0.964674	0.002717	0.032609	0.00542	0.068156	0.036788	7.12609	4.73333	1	0	0	0	0	0	0	0	0	0	0	0	0	0	0	0	0	0	0	0	0	0	0	0	0	0	0	0	0	0
23116301|F|0-22:C>T-22:C>T	TGCAGGGGGGCCAGGGCCACAGCGTTCCCGCGTGGCCGGGGGAGCAGGAATCGGCCGGCAGCAATCAGC	TGCAGGGGGGCCAGGGCCACAGCGTTCCCGCGTGGCCGGGGGAGCAGGAATCGGCCGGCAGCAATCAGC	KN285935.1_scaffold-11571	108636	1	1.84E-28	22:C>T	22	0.997326	0.994638	0.013405	0.986595	0.005362	0.008043	0.010666	0.02645	0.018558	7.69348	4.4	1	0	0	0	0	0	0	0	0	0	0	0	0	0	0	0	0	0	0	0	0	0	0	0	0	0	0	0	0	0
23116306|F|0-8:G>A-8:G>A	TGCAGGGGGGTCCCCAGTGACCCTGACAGCAGCTGCTACTGCCAGCGAGTGCATGAGCGGTTCAGCAGG	TGCAGGGGGGTCCCCAGTGACCCTGACAGCAGCTGCTACTGCCAGCGAGTGCATG	KN283327.1_scaffold-7847	16550	1	2.13E-11	8:G>A	8	0.997326	1	0.021448	0.978552	0	0.021448	0	0.041975	0.020988	11.16017	9.625	1	0	0	0	0	0	0	0	0	0	0	0	0	0	0	0	0	0	0	0	0	0	0	0	0	0	0	2	0	0
23116308|F|0-44:G>A-44:G>A	TGCAGGGGGGTGGAGAGCAAGAGGCAGACGGGGCACATGCCCCCGAGATTTGTACATGGGATGAGGGCG	TGCAGGGGGGTGGAGAGCAAGAGGCAGACGGGGCACATGCCCCCGAGATTTGTACATGGGATGAGGGCG	KN287744.1_scaffold-14198	1485	1	1.84E-28	44:G>A	44	0.986631	0.95664	0.252033	0.747967	0.04336	0.208672	0.082961	0.377024	0.229992	6.00455	3.76364	1	0	2	0	0	-	1	0	0	2	0	2	0	0	0	0	2	0	0	2	0	0	2	0	0	0	1	-	0	0
23116310|F|0-61:C>T-61:C>T	TGCAGGGGGTCTCTCTGTGGAGGCATGATAGGGCCATCCCTCACCCTGTGCTGGTGTTGTGCCCCAAGC	TGCAGGGGGTCTCTCTGTGGAGGCATGATAGGGCCATCCCTCACCCTGTGCTGGTGTTGTGCCCCAAGC	KN280162.1_scaffold-3379	11641	1	1.84E-28	61:C>T	61	0.941176	1	0.008523	0.991477	0	0.008523	0	0.0169	0.00845	5.19814	3	1	0	0	0	-	0	0	0	0	0	0	0	0	0	0	0	0	0	0	0	0	0	0	0	0	0	0	-	0	0
23116313|F|0-13:C>G-13:C>G	TGCAGGGGGTGCACTGCCATGCTTAGGGGGTGCACATGCACCTGCATGAGCGGTTCAGCAGGAATGCCG	TGCAGGGGGTGCACTGCCATGCTTAGGGGGTGCACATGCACCTGCATG	KN289367.1_scaffold-16521	62380	5	4.65E-17	13:C>G	13	0.94385	1	0.002833	0.997167	0	0.002833	0	0.00565	0.002825	6.53901	4	1	0	-	0	0	0	0	0	0	0	0	0	-	0	0	0	0	0	0	0	0	0	0	0	0	0	-	0	0	0
23116315|F|0-54:A>G-54:A>G	TGCAGGGGGTTAAAGCAGGGTATGAGCAGCCCTGGACTAAATTGTTTCTATCCAATGCAATTTGTTCCC	TGCAGGGGGTTAAAGCAGGGTATGAGCAGCCCTGGACTAAATTGTTTCTATCCAATGCAATTTGTTCCC	KN278549.1_scaffold-1074	113691	1	1.84E-28	54:A>G	54	0.997326	1	0.016086	0.983914	0	0.016086	0	0.031654	0.015827	7.45726	3.5	1	0	0	0	0	0	0	0	0	0	0	0	0	0	0	0	0	0	0	0	0	0	0	0	0	0	0	0	0	2
23116339|F|0-46:C>T-46:C>T	TGCAGGGTAAGGGCACACCCATAGGGACTGACTTAGCAGGGCCTGGCTTATGGGTCCCTGCATGAGCGG	TGCAGGGTAAGGGCACACCCATAGGGACTGACTTAGCAGGGCCTGGCTTATGGGTCCCTGCATG	KN279599.1_scaffold-2576	46255	1	9.81E-26	46:C>T	46	1	1	0.005348	0.994652	0	0.005348	0	0.010638	0.005319	8.15957	3	1	0	0	0	0	0	0	0	0	0	0	0	0	0	0	0	0	0	0	0	0	0	0	0	0	0	0	0	0	0
23116345|F|0-6:G>A-6:G>A	TGCAGGGTAGGAGTAAGATTTCAAGTGACCTTGATTAAAGATAAAATGGTCTGAAATGAATCAAATGAA	TGCAGGGTAGGAGTAAGATTTCAAGTGACCTTGATTAAAGATAAAATGGTCTGAAATGAATCAAATGAA	KN288155.1_scaffold-14781	68653	1	1.84E-28	6:G>A	6	0.933155	1	0.008596	0.991404	0	0.008596	0	0.017044	0.008522	3.68677	3	1	0	0	0	0	0	0	0	0	0	0	0	0	0	0	0	0	0	0	0	0	0	0	-	-	0	0	0	0	0
23116347|F|0-30:A>T-30:A>T	TGCAGGGTATAAAAGCTTGCAGCCATTTACAGCCCTACAGCATGAGCGGTTCAGCAGGAATGCCGAGAC	TGCAGGGTATAAAAGCTTGCAGCCATTTACAGCCCTACAGCATG	KN287345.1_scaffold-13615	50531	1	6.43E-15	30:A>T	30	1	1	0.018717	0.981283	0	0.018717	0	0.036733	0.018366	10.85288	5.81818	1	0	0	0	0	0	0	0	0	0	0	0	0	0	0	0	0	0	0	0	0	0	0	0	0	0	0	0	0	0
23116363|F|0-25:G>T-25:G>T	TGCAGGGTCCCATTCACTTCCCTGGGTTGACGTGGGCTCCAAAAGTCCCCTTAGGCATGAGCGGTTCAG	TGCAGGGTCCCATTCACTTCCCTGGGTTGACGTGGGCTCCAAAAGTCCCCTTAGGCATG	KN284275.1_scaffold-9203	5132	2	5.20E-13	25:G>T	25	0.933155	1	0.005731	0.994269	0	0.005731	0	0.011396	0.005698	8.3066	4.5	1	0	-	0	0	-	0	0	2	0	0	0	-	0	2	0	0	0	0	0	0	0	0	0	0	0	0	0	-	0
23116365|F|0-24:C>T-24:C>T	TGCAGGGTCCGAGCATCACAGAGACATCACTCTCACCCTCTTGTGTGTCCCTGTGATGCTGGCCCCCTC	TGCAGGGTCCGAGCATCACAGAGACATCACTCTCACCCTCTTGTGTGTCCCTGTGATGCTGGCCCCCTC	KN293053.1_scaffold-21980	261822	1	1.84E-28	24:C>T	24	0.981283	1	0.00545	0.99455	0	0.00545	0	0.01084	0.00542	4.7037	3.33333	1	0	0	0	0	0	0	0	0	0	0	0	0	0	0	0	0	0	0	0	0	0	0	0	0	0	0	0	0	0
23116371|F|0-42:C>T-42:C>T	TGCAGGGTCTTCTGGGAAACTGCACCTCATGCTGCTGATGCTCATGACATGGGTGACACTTGCATGAGC	TGCAGGGTCTTCTGGGAAACTGCACCTCATGCTGCTGATGCTCATGACATGGGTGACACTTGCATGAGC	KN287796.1_scaffold-14270	11067	1	8.58E-27	42:C>T	42	0.991979	1	0.002695	0.997305	0	0.002695	0	0.005376	0.002688	6.52711	5	1	0	0	0	0	0	0	0	0	0	0	0	0	0	0	0	0	0	0	0	0	0	0	0	0	0	0	0	0	0
23116378|F|0-25:C>T-25:C>T	TGCAGGGTGCAGGCCGAGCCCATGCCTGACGGCTGCCCGCGTGCCCAGGCATGAGCGGTTCAGCAGGAA	TGCAGGGTGCAGGCCGAGCCCATGCCTGACGGCTGCCCGCGTGCCCAGGCATG	KN289429.1_scaffold-16617	321672	1	9.08E-20	25:C>T	25	0.770053	1	0.027778	0.972222	0	0.027778	0	0.054012	0.027006	7.72886	7.11111	1	0	-	0	-	-	-	0	0	2	0	0	0	0	0	-	-	0	0	0	0	0	0	0	0	0	0	-	-	-
23116385|F|0-27:G>A-27:G>A	TGCAGGGTGCTGCTCACCACACTGCTCGGTTGTATTCCTGCATGAGCGGTTCAGCAGGAATGCCGAGAC	TGCAGGGTGCTGCTCACCACACTGCTCGGTTGTATTCCTGCATG	KN282494.1_scaffold-6628	13975	1	6.43E-15	27:G>A	27	0.986631	0.98916	0.04878	0.95122	0.01084	0.03794	0.021445	0.092802	0.057124	9.08753	5.09524	1	0	0	0	0	0	0	0	0	0	0	0	0	0	0	0	0	0	0	0	0	0	0	0	0	0	0	0	0	0
23116388|F|0-9:C>T-9:C>T	TGCAGGGTGCTGCTCTCCATGCTGCCTGGCTACCACATGCCCATGTGTGCATGAGCGGTTCAGCAGGAA	TGCAGGGTGCTGCTCTCCATGCTGCCTGGCTACCACATGCCCATGTGTGCATG	KN285089.1_scaffold-10355	56840	2	9.08E-20	9:C>T	9	0.997326	1	0.008043	0.991957	0	0.008043	0	0.015956	0.007978	11.40043	6.6	1	0	0	0	0	0	0	0	0	0	0	0	0	0	0	0	0	0	0	0	0	0	0	0	0	0	0	0	0	0
23116389|F|0-19:C>T-19:C>T	TGCAGGGTGCTGCTTTCCACACTGCCTTTGTGCATGAGCGGTTCAGCAGGAATGCCGAGACCGATCTCG	TGCAGGGTGCTGCTTTCCACACTGCCTTTGTGCATG	KN280565.1_scaffold-3931	195610	1	1.04E-10	19:C>T	19	1	1	0.002674	0.997326	0	0.002674	0	0.005333	0.002667	14.05544	4	1	0	0	0	0	0	0	0	0	0	0	0	0	0	0	0	0	0	0	0	0	0	0	0	0	0	0	0	0	0
23116390|F|0-67:C>T-67:C>T	TGCAGGGTGCTTGCAGGGGGGGCACTGGTGCTCCTGCCAGACCCCACTTCCCATTGCCTAAGTGGCACA	TGCAGGGTGCTTGCAGGGGGGGCACTGGTGCTCCTGCCAGACCCCACTTCCCATTGCCTAAGTGGCACA	KN281710.1_scaffold-5552	76833	1	1.84E-28	67:C>T	67	0.967914	1	0.002762	0.997238	0	0.002762	0	0.00551	0.002755	4.41425	4	1	0	0	0	-	0	0	0	0	0	0	0	0	0	0	0	0	0	0	0	0	0	0	0	0	0	0	0	0	0
23116394|F|0-7:T>C-7:T>C	TGCAGGGTGGGATTGGAGCCAGCCCCATTGGAGGGGAAGAGCCCCATGCCCCTTCCCCCCCGGCAGATG	TGCAGGGTGGGATTGGAGCCAGCCCCATTGGAGGGGAAGAGCCCCATGCCCCTTCCCCCCCGGCAGATG	KN277883.1_scaffold-137	12263	1	1.84E-28	7:T>C	7	0.997326	0.997319	0.013405	0.986595	0.002681	0.010724	0.005348	0.02645	0.015899	6.91631	4.2	1	0	0	0	0	0	0	0	0	0	0	0	0	0	0	0	0	0	0	0	0	0	0	0	0	0	0	0	0	0
23116395|F|0-68:G>A-68:G>A	TGCAGGGTGGTGATGATGGGGGCAGGGTGGCTGGGGTTGGAAAGGCCCCTTCCACGGGTGTAAGTCCCG	TGCAGGGTGGTGATGATGGGGGCAGGGTGGCTGGGGTTGGAAAGGCCCCTTCCACGGGTGTAAGTCCCG	KN283189.1_scaffold-7645	42859	1	1.84E-28	68:G>A	68	0.989305	0.986486	0.1	0.9	0.013514	0.086486	0.026662	0.18	0.103331	6.89716	4.68182	1	0	0	0	0	0	0	0	0	0	0	0	0	0	0	0	0	0	0	0	0	0	0	0	0	0	0	0	0	0
23116399|F|0-37:G>A-37:G>A	TGCAGGGTTAATGCCCTAGAACAGGGTTGGCCCACCTGCGGCATGAGCGGTTCAGCAGGAATGCCGAGA	TGCAGGGTTAATGCCCTAGAACAGGGTTGGCCCACCTGCGGCATG	KN291330.1_scaffold-19441	24001	1	1.88E-15	37:G>A	37	0.983957	1	0.016304	0.983696	0	0.016304	0	0.032077	0.016039	7.81996	4.125	1	0	0	0	0	0	0	0	0	0	0	0	0	0	0	0	0	0	0	0	0	0	0	0	0	0	0	0	0	0
23116402|F|0-65:C>T-65:C>T	TGCAGGGTTCACTTTGGGGCAGGCAGGGAGCAAGAGCACCTGGAAGTGGAGGGATCACCCACTGACATC	TGCAGGGTTCACTTTGGGGCAGGCAGGGAGCAAGAGCACCTGGAAGTGGAGGGATCACCCACTGACATC	KN291602.1_scaffold-19824	65268	1	1.84E-28	65:C>T	65	0.994652	1	0.002688	0.997312	0	0.002688	0	0.005362	0.002681	6.37768	3	1	0	0	0	0	0	0	0	0	0	0	0	0	0	0	0	2	0	0	0	0	0	0	0	0	0	0	0	0	0
23116405|F|0-33:G>A-33:G>A	TGCAGGGTTGAGAAATAGAAGAGGGGCATTTCCGGGCATGAGCGGTTCAGCAGGAATGCCGAGACCGAT	TGCAGGGTTGAGAAATAGAAGAGGGGCATTTCCGGGCATG	KN278306.1_scaffold-722	31221	1	8.50E-13	33:G>A	33	1	0.997326	0.016043	0.983957	0.002674	0.013369	0.005333	0.031571	0.018452	7.55076	5	1	0	0	0	0	0	0	0	0	0	0	0	0	0	0	0	0	0	0	0	0	0	0	0	0	0	0	0	0	0
23116421|F|0-49:T>C-49:T>C	TGCAGGTAACCTCAAGGCTAGGCATCAATGTGGGAGTGAATGGCACACTTGGCATGAGCGGTTCAGCAG	TGCAGGTAACCTCAAGGCTAGGCATCAATGTGGGAGTGAATGGCACACTTGGCATG	KN289889.1_scaffold-17310	157890	1	1.01E-19	49:T>C	49	0.986631	0.00542	0.99729	0.00271	0.99458	0.00271	0.010781	0.005405	0.008093	8	8.56156	1	1	1	1	1	1	1	1	1	1	1	1	1	1	1	1	1	1	1	1	1	1	1	1	1	1	1	1	1	1
23116423|F|0-68:C>A-68:C>A	TGCAGGTAAGCACCGACCATTTCCTGCCCTTACTGGGCAATCTATTGTTTCTCTGGGATCCTGCCATGC	TGCAGGTAAGCACCGACCATTTCCTGCCCTTACTGGGCAATCTATTGTTTCTCTGGGATCCTGCCATGC	KN283222.1_scaffold-7690	23848	1	1.84E-28	68:C>A	68	0.975936	1	0.027397	0.972603	0	0.027397	0	0.053293	0.026647	7.02402	4	1	0	0	0	0	0	0	0	0	0	0	0	0	0	0	0	0	0	0	0	0	0	0	0	0	0	0	0	0	0
23116429|F|0-5:G>C-5:G>C	TGCAGGTAATGCCACTCCGCAGCTGCAAAGACCTTGGCCAACTTTAACGCTTCCTCACAAGTCTAGGGG	TGCAGGTAATGCCACTCCGCAGCTGCAAAGACCTTGGCCAACTTTAACGCTTCCTCACAAGTCTAGGGG		0	0	999	5:G>C	5	1	0.997326	0.085561	0.914439	0.002674	0.082888	0.005333	0.156481	0.080907	15.69723	4.04878	1	0	0	2	0	0	0	0	1	0	0	0	0	0	2	0	0	2	2	0	0	0	0	0	0	0	0	0	0	0
23116440|F|0-66:C>T-66:C>T	TGCAGGTACTGATATTTCATTTGTTTTTAGAGCTCTGACTCTGCTACTGTTCTCTCACCCCATTTTCTT	TGCAGGTACTGATATTTCATTTGTTTTTAGAGCTCTGACTCTGCTACTGTTCTCTCACCCCATTTTCTT	KN278035.1_scaffold-351	190249	1	1.84E-28	66:C>T	66	0.967914	0.994475	0.035912	0.964088	0.005525	0.030387	0.010989	0.069244	0.040116	5.72098	3.2	1	0	0	0	0	0	0	0	0	0	0	0	0	0	0	0	0	0	0	0	0	0	0	0	-	0	0	0	0	0
23116443|F|0-9:A>T-9:A>T	TGCAGGTAGACATTTAAATGCCAAGGACCTGATGAGTGGACAGCTTGCAGTGCTGACAGTGCAGCCAGG	TGCAGGTAGACATTTAAATGCCAAGGACCTGATGAGTGGACAGCTTGCAGTGCTGACAGTGCAGCCAGG	KN279494.1_scaffold-2416	147426	1	1.84E-28	9:A>T	9	0.983957	0.994565	0.054348	0.945652	0.005435	0.048913	0.01081	0.102788	0.056799	9.38261	3.4	1	0	0	0	0	0	0	0	0	0	0	0	0	0	0	0	0	0	0	0	0	0	0	0	0	0	0	0	2	0
23116447|F|0-9:C>A-9:C>A	TGCAGGTAGCCAAGTAAGGGGAGTCACTCAGGGTCAGAAGAAGCAAACAAGATCTGAGGGAGCATGAGC	TGCAGGTAGCCAAGTAAGGGGAGTCACTCAGGGTCAGAAGAAGCAAACAAGATCTGAGGGAGCATGAGC	KN281977.1_scaffold-5912	153827	1	8.58E-27	9:C>A	9	0.983957	0.978261	0.146739	0.853261	0.021739	0.125	0.042533	0.250414	0.146473	11.02203	5	1	0	0	0	0	0	0	0	0	0	0	0	0	0	0	0	0	0	0	0	0	0	0	0	0	0	0	0	0	0
23116448|F|0-33:C>T-33:C>T	TGCAGGTAGCCTCAGACCACTAGTTGTGGTACGCGATGTGGTACCCACTAGGCATGAGCGGTTCAGCAG	TGCAGGTAGCCTCAGACCACTAGTTGTGGTACGCGATGTGGTACCCACTAGGCATG	KN282663.1_scaffold-6877	52804	1	2.17E-21	33:C>T	33	1	0.991979	0.147059	0.852941	0.008021	0.139037	0.015914	0.250865	0.13339	11.62741	6.15625	1	0	0	0	0	0	2	0	0	0	0	2	0	0	0	0	2	0	0	0	0	2	0	0	0	0	0	0	0	0
23116452|F|0-16:A>G-16:A>G	TGCAGGTAGGAGCTGTAGGTGGGGGGGGGCAACATGAGTGGGAATAAAGTAGCCACTGCCTTCGTCAAA	TGCAGGTAGGAGCTGTAGGTGGGGGGGGGCAACATGAGTGGGAATAAAGTAGCCACTGCCTTCGTCAAA	KN280995.1_scaffold-4505	30256	1	1.84E-28	16:A>G	16	1	0.981283	0.176471	0.823529	0.018717	0.157754	0.036733	0.290657	0.163695	9.03463	4.82927	1	0	0	0	0	0	2	0	0	0	0	0	0	2	2	0	0	0	0	1	0	0	2	0	0	0	0	0	0	0
23116458|F|0-65:G>A-65:G>A	TGCAGGTAGTGGCAATGGGTGCACCAGGTTGGTTCAAAGCGCAGCACTGACAGTCTAGACAGGACGGGT	TGCAGGTAGTGGCAATGGGTGCACCAGGTTGGTTCAAAGCGCAGCACTGACAGTCTAGACAGGACGGGT	KN284946.1_scaffold-10155	345396	1	1.84E-28	65:G>A	65	0.994652	0.981183	0.115591	0.884409	0.018817	0.096774	0.036926	0.20446	0.120693	9.78867	6.44231	1	0	0	0	0	0	0	0	0	0	2	2	0	0	0	0	0	0	0	0	0	0	0	0	0	0	0	0	0	0
23116463|F|0-34:T>C-34:T>C	TGCAGGTATCCAAACAAGTGGCAGCTGGGAAGAATCATGCATGAGCGGTTCAGCAGGAATGCCGAGACC	TGCAGGTATCCAAACAAGTGGCAGCTGGGAAGAATCATGCATG	KN279752.1_scaffold-2799	104330	1	2.19E-14	34:T>C	34	0.989305	0.978378	0.175676	0.824324	0.021622	0.154054	0.042308	0.289627	0.165968	11.65859	7.35294	1	0	0	0	0	2	2	0	0	0	0	2	0	0	0	0	0	0	0	0	0	2	0	0	0	0	0	2	0	0
23116464|F|0-20:T>G-20:T>G	TGCAGGTATCCATATAGTTTTTTTGCCTTCCTCAGAAGCATGAGCGGTTCAGCAGGAATGCCGAGACCG	TGCAGGTATCCATATAGTTTTTTTGCCTTCCTCAGAAGCATG		0	0	999	20:T>G	20	0.970588	1	0.002755	0.997245	0	0.002755	0	0.005494	0.002747	10.09011	3	1	0	0	0	0	0	0	0	0	0	0	0	0	0	0	0	0	0	0	0	0	0	0	0	0	0	0	0	0	0
23116465|F|0-26:A>G-26:A>G	TGCAGGTATCCCCTTGCAGGCTGGGAAAGTTACAGCCTGCAAGGGCTGCTTGGGACTGGGGGAAGGGAG	TGCAGGTATCCCCTTGCAGGCTGGGAAAGTTACAGCCTGCAAGGGCTGCTTGGGACTGGGGGAAGGGAG	KN280339.1_scaffold-3616	374415	1	1.84E-28	26:A>G	26	0.991979	0.994609	0.056604	0.943396	0.005391	0.051213	0.010724	0.1068	0.058762	5.52174	3.24138	1	0	0	0	0	0	0	0	0	0	0	0	0	0	0	0	0	0	0	0	1	0	0	0	2	0	0	0	0	0
23116476|F|0-11:T>C-11:T>C	TGCAGGTATTTTGGGCCCTGGGGCACAACGGCAAGTAGCCTGGGGGGACTCTTGGCCTTTGTTACCCCT	TGCAGGTATTTTGGGCCCTGGGGCACAACGGCAAGTAGCCTGGGGGGACTCTTGGCCTTTGTTACCCCT	KN293607.1_scaffold-22829	159879	1	1.84E-28	11:T>C	11	1	1	0.008021	0.991979	0	0.008021	0	0.015914	0.007957	7.6383	5	1	0	0	0	0	0	0	0	0	0	0	0	0	2	0	0	0	0	0	0	0	0	0	0	0	0	0	0	0	0
23116491|F|0-65:G>A-65:G>A	TGCAGGTCAGCAAGAGACACACAGGTTCTCCCTACCCTGAGGAAATAGTTACCCCCTCCTCGGACGAGT	TGCAGGTCAGCAAGAGACACACAGGTTCTCCCTACCCTGAGGAAATAGTTACCCCCTCCTCGGACGAGT	KN289206.1_scaffold-16286	372361	1	1.84E-28	65:G>A	65	0.997326	0.997319	0.016086	0.983914	0.002681	0.013405	0.005348	0.031654	0.018501	8.58333	3.66667	1	0	0	0	0	0	0	0	0	0	0	0	0	0	0	0	0	0	0	0	0	0	0	0	0	0	0	0	0	0
23116493|F|0-29:A>G-29:A>G	TGCAGGTCAGGAGGGGAGCAGGCTAGGCAAACTAGGTGCATGAGCGGTTCAGCAGGAATGCCGAGACCG	TGCAGGTCAGGAGGGGAGCAGGCTAGGCAAACTAGGTGCATG	JRXG01072424.1_scaffold-14413_1	28529	1	7.45E-14	29:A>G	29	1	1	0.026738	0.973262	0	0.026738	0	0.052046	0.026023	12.66383	6.91667	1	0	0	0	0	0	0	0	0	0	0	0	0	0	0	0	0	0	0	0	0	0	0	0	0	0	0	0	0	0
23116498|F|0-42:C>T-42:C>T	TGCAGGTCATGAAAGCGTGGCACTCCCTGCCACCGGCAGCTGCGCATGAGCGGTTCAGCAGGAATGCCG	TGCAGGTCATGAAAGCGTGGCACTCCCTGCCACCGGCAGCTGCGCATG	KN287045.1_scaffold-13197	1009428	1	4.65E-17	42:C>T	42	0.997326	0.975871	0.147453	0.852547	0.024129	0.123324	0.047093	0.251421	0.149257	11.20879	8.81159	1	2	2	0	0	0	0	2	0	0	0	0	0	0	0	0	0	0	0	0	2	0	1	1	2	0	0	0	0	0
23116506|F|0-42:C>T-42:C>T	TGCAGGTCCACCACCTGCTCATGGGGGAGAAGCAGCAGCTGCCATTAGGGATATGGTGTCAGGGACAGT	TGCAGGTCCACCACCTGCTCATGGGGGAGAAGCAGCAGCTGCCATTAGGGATATGGTGTCAGGGACAGT	KN290455.1_scaffold-18139	84579	1	1.84E-28	42:C>T	42	1	0.997326	0.029412	0.970588	0.002674	0.026738	0.005333	0.057093	0.031213	7.38593	3	1	0	0	0	0	0	0	0	0	0	0	2	0	0	0	0	0	0	0	0	0	0	0	2	0	0	0	0	0	0
23116509|F|0-23:G>A-23:G>A	TGCAGGTCCAGCAGAACTCCGGGGGTTGAGCCTCCCAAGAGTCTAAAAGAAGCAGCATGAGCGGTTCAG	TGCAGGTCCAGCAGAACTCCGGGGGTTGAGCCTCCCAAGAGTCTAAAAGAAGCAGCATG	KN282811.1_scaffold-7103	29679	1	5.12E-23	23:G>A	23	1	0.983957	0.248663	0.751337	0.016043	0.23262	0.031571	0.37366	0.202615	9.19438	5.90678	1	0	0	2	0	0	0	0	2	0	2	0	2	0	0	2	0	0	0	2	0	0	2	2	0	0	2	2	0	0
23116512|F|0-63:A>T-63:A>T	TGCAGGTCCAGGTTTCTGACAAACAATGACTGCATACTTTTATTGTCAGAATGGCCCTCTTCAAAATTA	TGCAGGTCCAGGTTTCTGACAAACAATGACTGCATACTTTTATTGTCAGAATGGCCCTCTTCAAAATTA	KN279892.1_scaffold-2994	18977	1	1.84E-28	63:A>T	63	0.92246	1	0.011594	0.988406	0	0.011594	0	0.02292	0.01146	3.58234	2.4	1	-	0	0	0	0	0	0	0	0	0	0	0	-	0	0	0	0	0	-	0	0	-	0	-	0	0	0	0	0
23116518|F|0-52:T>A-52:T>A	TGCAGGTCCTAAAATCTGGTGGCTGGGGAGTGGTGGCAGCATTAATTGCCACTCCTCTGTTACCAAATT	TGCAGGTCCTAAAATCTGGTGGCTGGGGAGTGGTGGCAGCATTAATTGCCACTCCTCTGTTACCAAATT	KN289930.1_scaffold-17376	67140	1	8.58E-27	52:T>A	52	0.994652	0.005376	1	0	0.994624	0.005376	0.010695	0	0.005347	3.5	4.95435	1	1	1	1	1	1	1	1	1	1	1	1	1	1	1	1	1	1	1	1	1	1	1	1	1	1	1	1	1	1
23110380|F|0-28:G>C-28:G>C	TGCAGGTCCTCACCCCCAATGGAGCTACGTTGCAGGGCTTAGTTTCAACGGGACTGGGCTCTTCCAGCT	TGCAGGTCCTCACCCCCAATGGAGCTACGTTGCAGGGCTTAGTTTCAACGGGACTGGGCTCTTCCAGCT	KN291933.1_scaffold-20318	6532	1	1.84E-28	28:G>C	28	0.890374	0.978979	0.027027	0.972973	0.021021	0.006006	0.041158	0.052593	0.046876	6.41523	4.33333	1	0	0	0	0	0	0	0	0	0	0	0	-	0	0	0	0	0	0	0	0	0	0	0	0	0	0	0	0	0
23116520|F|0-33:C>T-33:C>T	TGCAGGTCCTCAGATATTTCCCCCCCCAGTCTTCCAGGCTTTCTGCTATTTTCTAGGCATGAGCGGTTC	TGCAGGTCCTCAGATATTTCCCCCCCCAGTCTTCCAGGCTTTCTGCTATTTTCTAGGCATG	KN285402.1_scaffold-10814	9272	1	4.20E-24	33:C>T	33	0.981283	0.980926	0.106267	0.893733	0.019074	0.087193	0.03742	0.189949	0.113684	7.94	5.77551	1	0	0	0	0	0	0	0	0	0	0	0	0	0	0	0	0	0	0	0	0	0	0	0	0	0	0	0	0	0
23116527|F|0-7:C>T-7:C>T	TGCAGGTCGCACATGCTGGGCTACAGAGGCCCTGGGGAAGGGCAGCAGGGCAGGGAGCATGAGCGGTTC	TGCAGGTCGCACATGCTGGGCTACAGAGGCCCTGGGGAAGGGCAGCAGGGCAGGGAGCATG	KN285458.1_scaffold-10894	53176	1	4.20E-24	7:C>T	7	1	0.981283	0.173797	0.826203	0.018717	0.15508	0.036733	0.287183	0.161958	11.4913	6.85897	1	0	0	0	0	2	0	0	0	0	0	2	2	1	0	1	0	2	2	0	0	0	0	0	0	0	2	0	0	0
23116534|F|0-23:A>C-23:A>C	TGCAGGTCTCACCAAGTCGAAGTAGAGCAGGAAGATGACATCCTTAGATGTCATCCTCAGATGCCTGAG	TGCAGGTCTCACCAAGTCGAAGTAGAGCAGGAAGATGACATCCTTAGATGTCATCCTCAGATGCCTGAG	KN286125.1_scaffold-11844	1335	1	1.84E-28	23:A>C	23	0.989305	1	0.002703	0.997297	0	0.002703	0	0.005391	0.002695	9.79266	3	1	0	0	0	0	0	0	0	0	0	0	0	0	0	0	0	0	0	0	0	0	0	0	0	0	0	0	0	0	0
23116539|F|0-13:C>A-13:C>A	TGCAGGTCTCTGCCCAGTGAAGGAGCAAAGGGGAGGGGCCAGCCCAGCTCTTTGGAGCAGAAAGCCCTG	TGCAGGTCTCTGCCCAGTGAAGGAGCAAAGGGGAGGGGCCAGCCCAGCTCTTTGGAGCAGAAAGCCCTG	JRXG01098429.1_scaffold-20114_1	31714	1	1.84E-28	13:C>A	13	0.997326	1	0.021448	0.978552	0	0.021448	0	0.041975	0.020988	7.61325	3.7	1	0	0	0	0	0	0	0	0	0	0	0	0	0	0	0	0	0	0	0	0	0	0	0	0	0	0	0	0	0
23116544|F|0-20:T>A-20:T>A	TGCAGGTCTGCTGAACCAAATGCAGTTTTGAGCAGGCTACTTAATAAGTGGATGGGCAGGTCAGGAGCA	TGCAGGTCTGCTGAACCAAATGCAGTTTTGAGCAGGCTACTTAATAAGTGGATGGGCAGGTCAGGAGCA	KN288528.1_scaffold-15317	34474	1	1.84E-28	20:T>A	20	0.989305	0.991892	0.048649	0.951351	0.008108	0.040541	0.016085	0.092564	0.054324	8.27922	5.57143	1	0	0	0	0	0	0	0	0	0	0	0	0	0	0	0	0	0	0	0	0	0	0	0	0	0	0	0	0	0
23116548|F|0-35:G>A-35:G>A	TGCAGGTCTGGCAAGATTTCGGAGATGGAGCCATCGGAATGAATAAAAGGAGCTGTGTGCCCAGCATGA	TGCAGGTCTGGCAAGATTTCGGAGATGGAGCCATCGGAATGAATAAAAGGAGCTGTGTGCCCAGCATGA	JRXG01053208.1_scaffold-10359_1	15668	3	6.63E-28	35:G>A	35	1	1	0.016043	0.983957	0	0.016043	0	0.031571	0.015785	11.89149	5.375	1	0	0	0	0	0	0	0	0	0	0	0	0	0	0	0	0	0	0	0	2	0	0	0	0	0	0	0	0	0
23116549|F|0-6:T>G-6:T>G	TGCAGGTCTGGCATCACCACCATGAAGCGCCCGCTCTGCACCAGGGCTAGCCAGGTAGAGTTCCTGAAG	TGCAGGTCTGGCATCACCACCATGAAGCGCCCGCTCTGCACCAGGGCTAGCCAGGTAGAGTTCCTGAAG	KN288256.1_scaffold-14930	3095	1	1.84E-28	6:T>G	6	1	1	0.002674	0.997326	0	0.002674	0	0.005333	0.002667	8.1	3	1	0	0	0	0	0	0	0	0	0	0	0	0	0	0	0	0	0	0	0	0	0	0	0	0	0	0	0	0	0
23116550|F|0-59:T>C-59:T>C	TGCAGGTCTGTGAGTTGCTGCTAATGCCGCATCCTCTGAGTTCTGGACTGTGCTGCAAATGGCATGAGC	TGCAGGTCTGTGAGTTGCTGCTAATGCCGCATCCTCTGAGTTCTGGACTGTGCTGCAAATGGCATGAGC	KN286631.1_scaffold-12594	361484	1	8.58E-27	59:T>C	59	0.994652	0.997312	0.045699	0.954301	0.002688	0.043011	0.005362	0.087221	0.046291	11.53004	4.58824	1	0	0	0	0	0	0	0	0	0	0	0	2	0	0	2	0	0	0	0	0	0	0	0	0	2	0	0	0	0
23116560|F|0-19:A>C-19:A>C	TGCAGGTGAAAGGCAGTGAAGTTTCATGCCAAAATACAACTAAAGGGGGGCATGTAGCCATTGTAGGGC	TGCAGGTGAAAGGCAGTGAAGTTTCATGCCAAAATACAACTAAAGGGGGGCATGTAGCCATTGTAGGGC	KN287632.1_scaffold-14041	42722	1	1.84E-28	19:A>C	19	0.986631	1	0.00542	0.99458	0	0.00542	0	0.010781	0.005391	7.13203	3.33333	1	0	0	0	0	0	0	0	0	0	0	0	0	0	0	0	0	0	0	0	0	0	0	0	0	0	0	0	0	0
23116563|F|0-57:C>A-57:C>A	TGCAGGTGAAGCCTCACTAGTGCTGAATAGAGCAGAAGAATCATTTCCCTTGATTTGCAAGTGATATCC	TGCAGGTGAAGCCTCACTAGTGCTGAATAGAGCAGAAGAATCATTTCCCTTGATTTGCAAGTGATATCC	KN286129.1_scaffold-11851	104090	10	1.84E-28	57:C>A	57	0.986631	1	0.01084	0.98916	0	0.01084	0	0.021445	0.010723	9.97408	3.85714	1	0	0	0	0	0	0	0	0	0	0	0	0	0	0	0	0	0	0	0	0	0	0	0	0	0	0	0	0	0
23116567|F|0-50:C>T-50:C>T	TGCAGGTGAATTTGTCTGGATTTAGAAACTGGCCTTTCATCAGGGCTATCCGGCCACTGCATGAGCGGT	TGCAGGTGAATTTGTCTGGATTTAGAAACTGGCCTTTCATCAGGGCTATCCGGCCACTGCATG	KN290953.1_scaffold-18871	406464	1	3.43E-25	50:C>T	50	0.991979	0.959569	0.304582	0.695418	0.040431	0.264151	0.077593	0.423624	0.250608	7.35123	4.5942	1	0	2	1	2	0	0	2	2	2	2	2	0	0	0	2	2	0	1	0	0	1	0	0	2	0	0	0	2	2
23116573|F|0-63:T>C-63:T>C	TGCAGGTGAGGATTGACCAAGCCAGTTTCTCATGTTGCCACAAAACAAACACCCCACCTTTGTTGCCCT	TGCAGGTGAGGATTGACCAAGCCAGTTTCTCATGTTGCCACAAAACAAACACCCCACCTTTGTTGCCCT	KN284236.1_scaffold-9138	29413	1	8.58E-27	63:T>C	63	0.997326	0.739946	0.659517	0.340483	0.260054	0.399464	0.384851	0.449108	0.41698	5.4157	5.21683	1	2	0	0	2	0	2	1	1	0	1	1	2	2	2	2	0	0	0	1	2	1	1	1	0	2	0	0	1	1
23116576|F|0-37:T>C-37:T>C	TGCAGGTGAGTGATGCTGAGCCAGTCTTCAGGCCAGATTGGGCCCCCAGACTGGTCCTGCACACTGGAT	TGCAGGTGAGTGATGCTGAGCCAGTCTTCAGGCCAGATTGGGCCCCCAGACTGGTCCTGCACACTGGAT	KN277981.1_scaffold-279	9028	1	1.84E-28	37:T>C	37	0.991979	1	0.026954	0.973046	0	0.026954	0	0.052455	0.026228	6.03863	3.16667	1	0	0	0	0	0	0	0	0	0	0	0	0	0	0	0	0	0	0	0	0	0	0	0	0	0	0	0	0	0
23116577|F|0-61:T>C-61:T>C	TGCAGGTGAGTGCAGCATGTGGGGACAGCCCCATCCAGCCTAGTAGTGCTCCCACCCAAGTTCCCAGTA	TGCAGGTGAGTGCAGCATGTGGGGACAGCCCCATCCAGCCTAGTAGTGCTCCCACCCAAGTTCCCAGTA	JRXG01017889.1_scaffold-3306_1	16018	1	1.84E-28	61:T>C	61	1	0.991979	0.064171	0.935829	0.008021	0.05615	0.015914	0.120106	0.06801	8.33262	5.57143	1	0	0	0	0	0	0	0	0	2	0	0	0	0	0	0	0	0	0	0	0	0	0	0	0	0	0	0	0	0
23116579|F|0-18:G>A-18:G>A	TGCAGGTGATAGGTTGCTGATCCCTGCACTAGAGAATGGGGCAGGCTATGATGCATGAGCGGTTCAGCA	TGCAGGTGATAGGTTGCTGATCCCTGCACTAGAGAATGGGGCAGGCTATGATGCATG	KN280410.1_scaffold-3713	121630	1	6.23E-22	18:G>A	18	0.994652	0.932796	0.352151	0.647849	0.067204	0.284946	0.125376	0.456281	0.290828	11.37097	8.05389	1	1	2	0	0	0	0	2	2	2	0	0	2	0	1	2	0	1	1	2	0	2	0	0	2	0	2	0	0	2
23116587|F|0-6:T>G-6:T>G	TGCAGGTGCAGAGCTTGACTGGCCAACATGGAGAAGCTTTAACTTCCTCCCAACAGGTGTCAGTAAGAC	TGCAGGTGCAGAGCTTGACTGGCCAACATGGAGAAGCTTTAACTTCCTCCCAACAGGTGTCAGTAAGAC	KN278435.1_scaffold-907	9357	2	1.84E-28	6:T>G	6	0.994652	1	0.002688	0.997312	0	0.002688	0	0.005362	0.002681	7.86938	3	1	0	0	0	0	0	0	0	0	0	0	0	0	0	0	0	0	0	0	0	0	0	0	0	0	0	0	0	0	0
23116590|F|0-13:C>T-13:C>T	TGCAGGTGCATCACTTTGTGCTTGTCAGTGTTGAATCCCATCCTGTTCTCATCCACCCACCCCTGTAAC	TGCAGGTGCATCACTTTGTGCTTGTCAGTGTTGAATCCCATCCTGTTCTCATCCACCCACCCCTGTAAC	KN289392.1_scaffold-16556	91952	10	5.16E-24	13:C>T	13	0.991979	1	0.005391	0.994609	0	0.005391	0	0.010724	0.005362	6.7957	4	1	0	0	0	0	0	0	0	0	0	0	0	0	0	0	0	0	0	0	0	0	0	0	0	-	0	0	0	0	0
23116599|F|0-32:C>T-32:C>T	TGCAGGTGCCGCTTGCAGCTCTTTCCATACCTCGGGGCACTAAATTGTCTTAAAGGCATTAATCATGGT	TGCAGGTGCCGCTTGCAGCTCTTTCCATACCTCGGGGCACTAAATTGTCTTAAAGGCATTAATCATGGT	KN292654.1_scaffold-21366	495	1	8.58E-27	32:C>T	32	0.997326	0.997319	0.032172	0.967828	0.002681	0.029491	0.005348	0.062273	0.03381	7.72222	5.0625	1	0	0	0	0	0	0	0	2	0	0	0	0	0	0	0	0	2	0	0	0	0	0	0	0	0	0	0	0	0
23116603|F|0-22:T>C-22:T>C	TGCAGGTGCTCGACCACCTGGGTGACAGCAATCATCGCCTGACGAAATTTACCATCCAGCGCAAGGTGG	TGCAGGTGCTCGACCACCTGGGTGACAGCAATCATCGCCTGACGAAATTTACCATCCAGCGCAAGGTGG	KN289092.1_scaffold-16117	263801	11	8.64E-22	22:T>C	22	0.994652	1	0.008065	0.991935	0	0.008065	0	0.015999	0.007999	8.77944	3	1	0	0	0	0	0	0	0	0	0	0	0	0	0	0	0	0	0	0	0	0	0	0	0	0	0	0	0	0	0
23116616|F|0-25:A>G-25:A>G	TGCAGGTGCTGGGTCCAGCATGTGCACAGCATGTGCTAGCCCTAAAGCTGCTGTGCCCATGGCATTTGG	TGCAGGTGCTGGGTCCAGCATGTGCACAGCATGTGCTAGCCCTAAAGCTGCTGTGCCCATGGCATTTGG	KN285360.1_scaffold-10756	123424	1	1.84E-28	25:A>G	25	1	0.652406	0.751337	0.248663	0.347594	0.403743	0.453545	0.37366	0.413602	8.06908	9.65043	1	2	2	1	2	0	2	2	2	0	0	2	0	0	1	0	1	1	2	0	1	2	0	2	0	0	1	0	2	2
23116620|F|0-28:G>A-28:G>A	TGCAGGTGCTTCAAGCTATTCTGCCTTCGTGCAATAACAGTGCTATAGGGCAGCCTACTGGTGTGGGGG	TGCAGGTGCTTCAAGCTATTCTGCCTTCGTGCAATAACAGTGCTATAGGGCAGCCTACTGGTGTGGGGG	KN291497.1_scaffold-19673	552667	1	1.84E-28	28:G>A	28	0.991979	1	0.032345	0.967655	0	0.032345	0	0.062598	0.031299	6.28694	3.23077	1	0	0	0	0	0	0	0	0	0	0	0	0	0	0	0	0	0	0	0	0	2	2	0	0	0	2	0	0	0
23116621|F|0-22:C>T-22:C>T	TGCAGGTGCTTCCTCAGTCTGACAAAGGGTATTTCAACCTGAAAGCTGGCATCCTGGGCAGCTCAGCTG	TGCAGGTGCTTCCTCAGTCTGACAAAGGGTATTTCAACCTGAAAGCTGGCATCCTGGGCAGCTCAGCTG	KN288777.1_scaffold-15675	237336	5	1.84E-28	22:C>T	22	0.989305	0.991892	0.054054	0.945946	0.008108	0.045946	0.016085	0.102264	0.059175	6.08677	4.08	1	0	0	0	0	0	0	0	0	0	0	0	0	0	0	0	0	0	0	0	0	0	0	0	0	0	0	0	0	0
23116623|F|0-63:T>C-63:T>C	TGCAGGTGGACAGCCACCAACTCATTGGCTCTAGCCTGTGTGCAGTTGGCTACTCCAGCTGCCTCATGG	TGCAGGTGGACAGCCACCAACTCATTGGCTCTAGCCTGTGTGCAGTTGGCTACTCCAGCTGCCTCATGG	KN282207.1_scaffold-6242	145003	1	8.58E-27	63:T>C	63	1	0.002674	1	0	0.997326	0.002674	0.005333	0	0.002667	8	7.25855	1	1	1	1	1	1	1	1	1	1	1	1	1	1	1	1	1	1	1	1	1	1	1	1	1	1	1	1	1	1
23116626|F|0-23:T>C-23:T>C	TGCAGGTGGACCTTGGCTGCCCCTCCCACAAGATCCAGGAGGCACCAGTTGCCGAGCTGGGGGGCACGG	TGCAGGTGGACCTTGGCTGCCCCTCCCACAAGATCCAGGAGGCACCAGTTGCCGAGCTGGGGGGCACGG	KN290275.1_scaffold-17878	90473	6	1.84E-28	23:T>C	23	0.981283	1	0.016349	0.983651	0	0.016349	0	0.032163	0.016081	5.72391	3	1	0	0	0	2	0	0	0	0	0	0	0	0	0	0	0	0	0	0	0	0	0	0	0	0	0	0	0	0	0
23116634|F|0-9:C>T-9:C>T	TGCAGGTGGCCACCTCAGCATCCATGTGGTCCACATGCTGCTTGCACAGTCCAGATGGCATGGGGTGGC	TGCAGGTGGCCACCTCAGCATCCATGTGGTCCACATGCTGCTTGCACAGTCCAGATGGCATGGGGTGGC	KN284704.1_scaffold-9816	154181	1	1.84E-28	9:C>T	9	0.997326	1	0.008043	0.991957	0	0.008043	0	0.015956	0.007978	10.97222	2	1	0	0	0	0	0	0	0	0	0	0	0	0	0	0	0	0	0	0	0	0	0	0	0	0	0	0	0	0	0
23116639|F|0-31:C>T-31:C>T	TGCAGGTGGCTGGGTGGATAGAAAGTGCAGCCCTGCATGAGCGGTTCAGCAGGAATGCCGAGACCGATC	TGCAGGTGGCTGGGTGGATAGAAAGTGCAGCCCTGCATG	KN280627.1_scaffold-4012	202621	1	2.85E-12	31:C>T	31	0.983957	1	0.005435	0.994565	0	0.005435	0	0.01081	0.005405	8.69048	5.5	1	0	0	0	0	0	0	0	0	0	0	0	0	0	0	0	0	0	0	0	0	0	0	0	0	0	0	0	0	0
23116642|F|0-55:C>G-55:C>G	TGCAGGTGGGAGACATGCACCATCAGGCCAAGCCTAGCCAGCTGTGTTTCTTCATCTGGGGCTTTGGCA	TGCAGGTGGGAGACATGCACCATCAGGCCAAGCCTAGCCAGCTGTGTTTCTTCATCTGGGGCTTTGGCA	KN284234.1_scaffold-9135	109862	1	1.84E-28	55:C>G	55	1	0.906417	0.36631	0.63369	0.093583	0.272727	0.16965	0.464254	0.316952	10.88084	7.71176	1	0	0	2	0	0	0	0	2	0	0	0	0	2	0	0	0	0	0	0	0	0	0	0	0	0	0	0	0	0
23116656|F|0-21:G>C-21:G>C	TGCAGGTGGTAAAATCCTCAGGGCTGTTCAGAACAGGATGAGCAAGCCTCTGTTTTCATAATCCTTGCA	TGCAGGTGGTAAAATCCTCAGGGCTGTTCAGAACAGGATGAGCAAGCCTCTGTTTTCATAATCCTTGCA		0	0	999	21:G>C	21	0.994652	0.672043	0.922043	0.077957	0.327957	0.594086	0.440802	0.143759	0.292281	9.22293	8.80374	1	2	0	2	1	1	2	2	2	1	2	1	2	2	2	2	2	1	1	2	2	2	2	1	0	0	2	1	2	2
23116662|F|0-49:A>C-49:A>C	TGCAGGTGGTGCTCCCACCATGCATCCTCCACCTCTCATACCTCCTCCGAATAGGTTTCCCGGAAAAGA	TGCAGGTGGTGCTCCCACCATGCATCCTCCACCTCTCATACCTCCTCCGAATAGGTTTCCCGGAAAAGA	KN288786.1_scaffold-15685	52577	1	1.84E-28	49:A>C	49	0.997326	1	0.002681	0.997319	0	0.002681	0	0.005348	0.002674	6.82479	3	1	-	0	0	0	0	0	0	0	0	0	0	0	0	0	0	0	0	0	0	0	0	0	0	0	0	0	0	0	0
23116663|F|0-15:C>T-15:C>T	TGCAGGTGGTGCTCCCTCTTTCAGATGTCCTTTGCACACTGCACCTTCTCCACCCAAGCCTCACAGAAC	TGCAGGTGGTGCTCCCTCTTTCAGATGTCCTTTGCACACTGCACCTTCTCCACCCAAGCCTCACAGAAC	KN279461.1_scaffold-2358	207667	1	1.84E-28	15:C>T	15	0.997326	1	0.005362	0.994638	0	0.005362	0	0.010666	0.005333	6.73718	3.5	1	0	0	0	0	0	0	0	0	0	0	0	0	0	0	0	0	0	0	0	0	0	0	0	0	0	0	0	2	0
23116674|F|0-22:A>C-22:A>C	TGCAGGTGTCAAACCACAGTAAACTGACTTTTGCCACATAAACCTTAGCATGAGCGGTTCAGCAGGAAT	TGCAGGTGTCAAACCACAGTAAACTGACTTTTGCCACATAAACCTTAGCATG	KN289482.1_scaffold-16697	144013	1	3.14E-19	22:A>C	22	0.994652	0.994624	0.142473	0.857527	0.005376	0.137097	0.010695	0.244349	0.127522	14.59267	8.34921	1	2	0	0	0	0	0	2	0	0	0	0	0	0	0	0	0	0	0	0	0	0	0	2	0	0	0	0	0	0
23116685|F|0-16:T>C-16:T>C	TGCAGGTGTGTGCACGTGCTGATCCAACCACCAGTGTGTACAAGTATGTGTGCATGAGCGGTTCAGCAG	TGCAGGTGTGTGCACGTGCTGATCCAACCACCAGTGTGTACAAGTATGTGTGCATG	KN287045.1_scaffold-13197	619059	1	2.17E-21	16:T>C	16	1	0.967914	0.323529	0.676471	0.032086	0.291444	0.062112	0.437716	0.249914	12.51762	7.84868	1	2	0	0	0	2	2	0	0	0	2	0	1	2	0	0	2	2	2	0	0	0	0	0	0	0	0	0	0	0
23116700|F|0-41:G>A-41:G>A	TGCAGGTTATCCCCAGCCTGGGAACCCCAGGACTAGCTAGCGTCAGTGCTCCTGCTCCTTGGAGTAAGG	TGCAGGTTATCCCCAGCCTGGGAACCCCAGGACTAGCTAGCGTCAGTGCTCCTGCTCCTTGGAGTAAGG	KN292721.1_scaffold-21463	21119	1	1.84E-28	41:G>A	41	0.989305	1	0.005405	0.994595	0	0.005405	0	0.010752	0.005376	5.87229	2.5	1	0	0	0	0	0	0	0	0	0	0	0	0	0	0	0	0	0	0	-	0	0	0	0	0	0	0	0	0	0
23116718|F|0-23:C>T-23:C>T	TGCAGGTTGAAATGCCTGTACTCCTCTCTCTCCCTTTCCAGATTTGTAGTGCTGGACATCTCCCATAAC	TGCAGGTTGAAATGCCTGTACTCCTCTCTCTCCCTTTCCAGATTTGTAGTGCTGGACATCTCCCATAAC	KN282290.1_scaffold-6345	113936	1	1.84E-28	23:C>T	23	0.970588	1	0.016529	0.983471	0	0.016529	0	0.032511	0.016256	6.86214	4.66667	1	0	0	0	0	0	0	0	0	0	0	0	2	0	0	2	0	0	0	0	0	0	0	0	0	0	0	0	0	0
23118574|F|0-52:C>A-52:C>A	TGCAGGTTGCAGGTTAAACTGGGTGTGGTGTTGCTAATTTGCAGCACGGGGGCAAAATTTGATACCAGG	TGCAGGTTGCAGGTTAAACTGGGTGTGGTGTTGCTAATTTGCAGCACGGGGGCAAAATTTGATACCAGG	KN279861.1_scaffold-2951	180337	2	1.84E-28	52:C>A	52	0.97861	1	0.027322	0.972678	0	0.027322	0	0.053152	0.026576	4.45374	3.5	1	0	0	0	0	0	0	0	2	0	0	0	0	0	0	0	0	0	0	0	0	0	0	0	0	-	0	0	0	0
23116720|F|0-20:C>G-20:C>G	TGCAGGTTGCGTGGTAAAAGCCTGGTCTTGCAAACCTATGTGTGAGTGAGTACTCCTTACCTCACTGCA	TGCAGGTTGCGTGGTAAAAGCCTGGTCTTGCAAACCTATGTGTGAGTGAGTACTCCTTACCTCACTGCA	KN278939.1_scaffold-1618	364537	1	1.84E-28	20:C>G	20	0.991979	1	0.002695	0.997305	0	0.002695	0	0.005376	0.002688	11.07725	3	1	0	0	0	0	0	0	0	0	0	0	0	0	0	0	0	0	0	0	0	0	0	0	0	0	0	0	0	0	0
23116723|F|0-30:C>T-30:C>T	TGCAGGTTGGAGTTGGAGCAAAGCAAGAGGCAAGTGGAGGGCAGGGGACAAAGGCTTAAGTGAGAGGCA	TGCAGGTTGGAGTTGGAGCAAAGCAAGAGGCAAGTGGAGGGCAGGGGACAAAGGCTTAAGTGAGAGGCA	KN285511.1_scaffold-10970	69602	1	8.58E-27	30:C>T	30	0.975936	0.00274	1	0	0.99726	0.00274	0.005464	0	0.002732	5	4.55677	1	1	1	1	1	1	1	1	1	1	1	1	1	1	1	1	-	1	1	1	1	1	1	1	1	1	1	1	1	1
23116728|F|0-56:T>C-56:T>C	TGCAGGTTGGCCACCCCGACTTAGGTCATCATGGAGAACCACAACGACTATTCTAATATAACAAAGGGC	TGCAGGTTGGCCACCCCGACTTAGGTCATCATGGAGAACCACAACGACTATTCTAATATAACAAAGGGC	KN283448.1_scaffold-8007	27662	1	1.84E-28	56:T>C	56	0.991979	0.989218	0.078167	0.921833	0.010782	0.067385	0.021331	0.144114	0.082722	4.96725	3.05405	1	0	0	0	0	0	0	0	0	0	0	0	0	0	0	0	0	0	0	0	0	0	0	0	-	0	0	0	0	0
23116729|F|0-55:G>C-55:G>C	TGCAGGTTGGCCACCTTTGTTATAAACAGTCAAATATCATCATTTGAAGTATGTAGTGAGAGCTCAGGG	TGCAGGTTGGCCACCTTTGTTATAAACAGTCAAATATCATCATTTGAAGTATGTAGTGAGAGCTCAGGG	KN293706.1_scaffold-22968	54162	1	1.84E-28	55:G>C	55	0.705882	0.996212	0.003788	0.996212	0.003788	0	0.007547	0.007547	0.007547	4.09174	3	1	0	-	-	-	1	0	-	-	-	0	0	0	0	0	0	0	-	-	0	-	-	0	0	-	0	-	0	0	-
23116739|F|0-8:G>T-8:G>T	TGCAGGTTGGTAAAGTAAGGGGGGAGCCATCTACGGGGCATCCCCAAAGGGAAGGGCATAGCCTAATGC	TGCAGGTTGGTAAAGTAAGGGGGGAGCCATCTACGGGGCATCCCCAAAGGGAAGGGCATAGCCTAATGC	JRXG01010695.1_scaffold-1974_1	2551	1	1.84E-28	8:G>T	8	0.997326	0.997319	0.123324	0.876676	0.002681	0.120643	0.005348	0.216231	0.110789	11.34402	6.07018	1	0	2	2	2	0	0	0	0	0	0	0	0	2	0	0	0	0	0	0	0	0	0	2	0	2	0	0	0	2
23116742|F|0-25:C>T-25:C>T	TGCAGGTTGTCCCTTATTGCCTTACCTATTGATGTCCCTTGAAAAGATTTCTGATTCATACCTATGTGA	TGCAGGTTGTCCCTTATTGCCTTACCTATTGATGTCCCTTGAAAAGATTTCTGATTCATACCTATGTGA	KN283328.1_scaffold-7848	90464	1	1.84E-28	25:C>T	25	0.965241	1	0.00554	0.99446	0	0.00554	0	0.011019	0.005509	4.73556	3	1	0	0	0	0	0	0	0	0	-	0	0	0	0	0	0	0	0	0	-	0	0	0	0	-	0	0	0	0	0
23116745|F|0-42:A>T-42:A>T	TGCAGGTTTATCTGTGTCAAAAATGCCAGGGGTATCGACGACAACAACTTTCTTCTGTCTCCAGAGCCT	TGCAGGTTTATCTGTGTCAAAAATGCCAGGGGTATCGACGACAACAACTTTCTTCTGTCTCCAGAGCCT	KN278121.1_scaffold-475	4145	3	1.84E-28	42:A>T	42	0.983957	1	0.035326	0.964674	0	0.035326	0	0.068156	0.034078	6.34573	3.33333	1	0	0	0	0	-	0	0	0	0	0	0	0	0	0	0	0	0	0	0	0	0	0	0	0	2	0	2	0	0
23116747|F|0-45:G>C-45:G>C	TGCAGGTTTATTTGACACAAGGATCTCCTGGTGTCCGAAAACCCCGCCTGCCATGCTGCAAATTAGCAG	TGCAGGTTTATTTGACACAAGGATCTCCTGGTGTCCGAAAACCCCGCCTGCCATGCTGCAAATTAGCAG	KN279401.1_scaffold-2274	146240	1	1.84E-28	45:G>C	45	0.991979	1	0.024259	0.975741	0	0.024259	0	0.047341	0.02367	6.85837	3.66667	1	0	0	0	0	0	0	0	0	2	0	0	0	0	0	0	0	0	0	0	0	0	0	0	0	0	0	0	0	0
23116757|F|0-54:G>T-54:G>T	TGCAGGTTTTCTTCCCCTTCCTTGTAAGTTTGGGACAACACCTCCCCTGCCCCAGGTCTCACTGTGCTG	TGCAGGTTTTCTTCCCCTTCCTTGTAAGTTTGGGACAACACCTCCCCTGCCCCAGGTCTCACTGTGCTG	KN290488.1_scaffold-18191	444997	1	1.84E-28	54:G>T	54	1	0.994652	0.061497	0.938503	0.005348	0.05615	0.010638	0.115431	0.063034	11.94861	6.35714	1	0	0	0	0	0	0	2	0	0	0	0	0	0	0	0	0	0	0	0	0	0	0	0	0	0	0	2	0	0
23116758|F|0-36:C>T-36:C>T	TGCAGGTTTTGAAGGCCACGCGTTCCCATCACAAAACGACCTCGGGGGGCTCCCAGCTGCGCGTGGCGG	TGCAGGTTTTGAAGGCCACGCGTTCCCATCACAAAACGACCTCGGGGGGCTCCCAGCTGCGCGTGGCGG	KN279761.1_scaffold-2812	83517	1	1.84E-28	36:C>T	36	0.967914	0.994475	0.013812	0.986188	0.005525	0.008287	0.010989	0.027243	0.019116	5.27778	3	1	0	0	0	0	0	0	0	0	0	0	0	0	0	0	0	0	0	0	0	0	0	0	0	0	0	0	0	0	0
23116760|F|0-8:T>G-8:T>G	TGCAGGTTTTGCTCTTTCATGTACATGGGAGTTTAGCTCAACAATATGACTGCATTTGGCAGAGCTGTG	TGCAGGTTTTGCTCTTTCATGTACATGGGAGTTTAGCTCAACAATATGACTGCATTTGGCAGAGCTGTG	KN280032.1_scaffold-3190	303715	1	1.84E-28	8:T>G	8	0.983957	1	0.002717	0.997283	0	0.002717	0	0.00542	0.00271	4.95207	3	1	0	0	0	0	0	0	0	0	0	0	0	0	0	0	0	0	0	0	0	0	0	0	0	0	0	0	0	0	0
23116763|F|0-13:G>A-13:G>A	TGCAGGTTTTTTCGACCCCTGGATACCCAGGGGTTAAAAAAAAACACGGAAAAACTGGTGCAATGCATG	TGCAGGTTTTTTCGACCCCTGGATACCCAGGGGTTAAAAAAAAACACGGAAAAACTGGTGCAATGCATG	KN278739.1_scaffold-1345	340914	1	1.84E-28	13:G>A	13	0.997326	0.981233	0.168901	0.831099	0.018767	0.150134	0.036829	0.280747	0.158788	9.23965	5.67089	1	0	0	0	2	0	0	0	0	0	0	0	0	0	0	0	0	2	1	0	0	2	0	0	0	0	0	1	0	0
23116773|F|0-68:T>C-68:T>C	TGCAGTAAAATACTAAAGCTTTAGCACAACGAGGGAGCGTGTGTCTAAGGTTTTGCTATAAGAGGAGAT	TGCAGTAAAATACTAAAGCTTTAGCACAACGAGGGAGCGTGTGTCTAAGGTTTTGCTATAAGAGGAGAT	KN286837.1_scaffold-12895	401350	1	1.84E-28	68:T>C	68	0.986631	0.99729	0.01626	0.98374	0.00271	0.01355	0.005405	0.031992	0.018698	8.61039	4.28571	1	0	0	0	0	0	0	0	0	0	0	0	0	0	0	0	0	0	0	0	0	0	0	0	0	0	0	0	0	0
23116775|F|0-36:A>T-36:A>T	TGCAGTAAAATATTAAGAAATATGCTTGGAAAAAATAGATAAGCCTAATGCATTGCATGAGCGGTTCAG	TGCAGTAAAATATTAAGAAATATGCTTGGAAAAAATAGATAAGCCTAATGCATTGCATG	KN283334.1_scaffold-7858	49089	1	5.12E-23	36:A>T	36	0.86631	0.987654	0.027778	0.972222	0.012346	0.015432	0.024387	0.054012	0.039199	6.59033	4	1	-	0	-	0	0	0	0	0	0	0	0	0	-	0	0	0	0	0	-	-	0	0	0	-	0	0	0	0	0
23116777|F|0-10:G>A-10:G>A	TGCAGTAAACGTCTCACCATTTACACATACAAGACTATCAAGCTGGAGTAAGATAATAAACTCCACAGC	TGCAGTAAACGTCTCACCATTTACACATACAAGACTATCAAGCTGGAGTAAGATAATAAACTCCACAGC	KN277890.1_scaffold-148	1508348	1	1.84E-28	10:G>A	10	0.967914	1	0.005525	0.994475	0	0.005525	0	0.010989	0.005494	4.76837	4	1	0	0	0	0	0	0	0	0	0	0	0	0	0	0	0	0	0	0	-	0	0	0	0	0	0	0	0	0	0
23116781|F|0-24:T>C-24:T>C	TGCAGTAAAGAGCAACCCTCCACCTAGATTGTAGCAGCTGGCTAAGGCAGCTAGAAGCAATTGGCATGA	TGCAGTAAAGAGCAACCCTCCACCTAGATTGTAGCAGCTGGCTAAGGCAGCTAGAAGCAATTGGCATGA	KN287690.1_scaffold-14124	69654	1	6.63E-28	24:T>C	24	0.994652	0.994624	0.172043	0.827957	0.005376	0.166667	0.010695	0.284888	0.147792	10.40773	6.33766	1	0	0	0	0	0	0	0	2	0	0	0	2	0	0	2	2	0	0	0	0	0	0	0	0	0	0	0	0	2
23116786|F|0-11:G>C-11:G>C	TGCAGTAAAGTGCACATGTAGATGCACCCCCTGAGGTGCATGTCACCAACATGCATGAGCGGTTCAGCA	TGCAGTAAAGTGCACATGTAGATGCACCCCCTGAGGTGCATGTCACCAACATGCATG	KN283883.1_scaffold-8635	22953	1	6.23E-22	11:G>C	11	0.989305	1	0.010811	0.989189	0	0.010811	0	0.021388	0.010694	12.52484	7.5	1	0	0	0	0	0	0	0	0	0	0	0	0	0	0	0	0	0	0	0	0	0	0	0	0	0	0	0	0	0
23116788|F|0-29:G>C-29:G>C	TGCAGTAAATCTAGTTTAGCACATTCCCAGGATCAGATGGAATTTATGACTAGGTTTGTTGCATGAGCG	TGCAGTAAATCTAGTTTAGCACATTCCCAGGATCAGATGGAATTTATGACTAGGTTTGTTGCATG	KN284305.1_scaffold-9243	414952	1	2.80E-26	29:G>C	29	0.983957	1	0.002717	0.997283	0	0.002717	0	0.00542	0.00271	10.28879	4	1	0	0	0	0	0	0	0	0	0	0	0	0	0	0	0	0	0	0	0	0	0	0	0	0	0	0	0	0	0
23110388|F|0-16:A>G-16:A>G	TGCAGTAAATGAGCCCACCCCAAAGTGACAGGCAAATCTGGTAACAACACACAGCCACACGCACACAGG	TGCAGTAAATGAGCCCACCCCAAAGTGACAGGCAAATCTGGTAACAACACACAGCCACACGCACACAGG		0	0	999	16:A>G	16	0.687166	0.937743	0.093385	0.906615	0.062257	0.031128	0.116762	0.169329	0.143045	7.56667	6.42857	1	1	0	-	-	-	0	2	0	1	0	-	-	-	-	0	0	-	0	1	-	2	0	0	-	-	0	-	-	0
23116791|F|0-60:C>T-60:C>T	TGCAGTAAATGTCTCATGTAGACATGCCTTCTGGGTACGTCCAGATGAGTGCACACATGCCTTTGCGGT	TGCAGTAAATGTCTCATGTAGACATGCCTTCTGGGTACGTCCAGATGAGTGCACACATGCCTTTGCGGT	KN277960.1_scaffold-249	7584	1	1.84E-28	60:C>T	60	0.991979	1	0.040431	0.959569	0	0.040431	0	0.077593	0.038797	9.81075	6.22222	1	0	0	0	0	0	0	0	0	0	0	0	0	0	0	0	0	0	0	0	0	0	0	0	0	0	0	0	2	0
23110390|F|0-52:T>A-52:T>A	TGCAGTAAATTTCTGCGGAGTAAACCCATCTAGCAGTATTTGCATGAGCGGTTCAGCAGGAATGCCGAG	TGCAGTAAATTTCTGCGGAGTAAACCCATCTAGCAGTATTTGCATG	KN289123.1_scaffold-16164	106163	4	5.50E-16	52:T>A	52	0.967914	1	0.002762	0.997238	0	0.002762	0	0.00551	0.002755	10.04595	3	1	0	0	0	0	0	0	0	0	0	0	0	0	0	0	0	0	0	0	0	0	0	0	0	0	0	0	0	0	0
23116797|F|0-57:G>A-57:G>A	TGCAGTAACAGCAATCCGTCGTTTTAGGATGTTAGCACCCTGATTTTCTGTAATCTAGTAGTTGAGTAA	TGCAGTAACAGCAATCCGTCGTTTTAGGATGTTAGCACCCTGATTTTCTGTAATCTAGTAGTTGAGTAA	KN286570.1_scaffold-12509	55280	1	1.84E-28	57:G>A	57	0.981283	1	0.016349	0.983651	0	0.016349	0	0.032163	0.016081	10.4488	4.85714	1	0	0	0	0	0	0	0	0	0	0	0	0	0	0	0	0	0	0	0	0	0	0	0	-	0	0	0	0	0
23116801|F|0-5:T>G-5:T>G	TGCAGTAACCAAAATTACTGTACAATATGGGTGTCTGTCTACACGTGCATGAGCGGTTCAGCAGGAATG	TGCAGTAACCAAAATTACTGTACAATATGGGTGTCTGTCTACACGTGCATG	KN282297.1_scaffold-6359	120677	1	1.09E-18	5:T>G	5	0.97861	1	0.002732	0.997268	0	0.002732	0	0.00545	0.002725	10.6849	3	1	0	0	0	0	0	0	0	0	0	0	0	0	0	0	0	0	0	0	0	0	0	0	0	0	0	0	0	0	0
23116802|F|0-49:C>T-49:C>T	TGCAGTAACCACCAAAGTGAGGCTTGAGTGGAATGAACCAGTGTTAGCACCTTGCAACACCTACAGCTT	TGCAGTAACCACCAAAGTGAGGCTTGAGTGGAATGAACCAGTGTTAGCACCTTGCAACACCTACAGCTT	KN283566.1_scaffold-8190	229213	1	1.84E-28	49:C>T	49	0.997326	0.986595	0.131367	0.868633	0.013405	0.117962	0.02645	0.22822	0.127335	12.83478	7.11667	1	0	0	2	0	0	1	0	0	0	0	0	2	0	2	2	0	0	0	0	0	0	0	0	0	0	0	0	0	0
23110391|F|0-39:C>T-39:C>T	TGCAGTAACTCTCATTGGGAAGAGTCCGCTCCCTTTCCACATACGAAATAGCAGCACGTGCATGAGCGG	TGCAGTAACTCTCATTGGGAAGAGTCCGCTCCCTTTCCACATACGAAATAGCAGCACGTGCATG	KN292104.1_scaffold-20562	478677	1	9.81E-26	39:C>T	39	1	0.868984	0.5	0.5	0.131016	0.368984	0.227702	0.5	0.363851	9.39756	8.27778	1	0	1	0	0	0	2	0	0	2	2	2	0	1	0	0	0	0	0	2	1	2	0	0	2	0	0	0	2	0
23116818|F|0-67:A>T-67:A>T	TGCAGTAAGCTTTTCCTGTGGGCAATTCTCGAACACAGGAGTGGTTAATAGCAGGGTACGTGCTTCAAG	TGCAGTAAGCTTTTCCTGTGGGCAATTCTCGAACACAGGAGTGGTTAATAGCAGGGTACGTGCTTCAAG	KN289673.1_scaffold-16990	4480	1	1.84E-28	67:A>T	67	1	1	0.005348	0.994652	0	0.005348	0	0.010638	0.005319	9.78038	8	1	0	0	0	0	0	0	0	0	0	0	0	0	0	0	0	0	0	0	0	0	0	0	0	0	0	0	0	0	0
23116824|F|0-45:T>G-45:T>G	TGCAGTAAGGGAGGGATGGGGTGCGGTGTGAGGTACAGCCATGGCTTGTCAGGGCGGGGGGGTGGCTCT	TGCAGTAAGGGAGGGATGGGGTGCGGTGTGAGGTACAGCCATGGCTTGTCAGGGCGGGGGGGTGGCTCT	KN293531.1_scaffold-22711	168189	1	1.84E-28	45:T>G	45	0.994652	1	0.018817	0.981183	0	0.018817	0	0.036926	0.018463	6.37393	4.875	1	0	0	0	0	0	0	0	0	0	0	0	2	0	0	2	0	0	0	0	0	0	2	2	0	0	0	0	0	0
23116825|F|0-24:T>C-24:T>C	TGCAGTAAGTAGTGAATAGCTTTTTAAGAAAAGTTTTAGGACACTTCAACAGAATTCCTCACTTGAAAT	TGCAGTAAGTAGTGAATAGCTTTTTAAGAAAAGTTTTAGGACACTTCAACAGAATTCCTCACTTGAAAT	KN289409.1_scaffold-16584	433411	1	1.84E-28	24:T>C	24	0.991979	0.981132	0.080863	0.919137	0.018868	0.061995	0.037024	0.148648	0.092836	5.26829	3.87805	1	0	0	0	0	0	0	0	0	0	0	0	0	0	0	2	0	0	0	0	0	0	0	0	0	0	0	0	0	0
23116826|F|0-36:C>T-36:C>T	TGCAGTAATAATGATGAGTACTCATGGGAGCATAGCCAGTCTCTGAGCAGGAACTGTATAGCCCGTCAC	TGCAGTAATAATGATGAGTACTCATGGGAGCATAGCCAGTCTCTGAGCAGGAACTGTATAGCCCGTCAC	KN286095.1_scaffold-11804	260461	1	1.84E-28	36:C>T	36	0.997326	1	0.048257	0.951743	0	0.048257	0	0.091857	0.045929	7.14499	3.92	1	0	0	0	0	0	0	0	0	0	0	0	0	0	0	0	0	0	0	0	0	0	0	0	0	0	0	0	0	0
23116828|F|0-22:G>T-22:G>T	TGCAGTAATAGCCCAAATAAAGGGAGCCCATGACAGATTCCACAATTCCATTGAGCAAGCAATGATGCA	TGCAGTAATAGCCCAAATAAAGGGAGCCCATGACAGATTCCACAATTCCATTGAGCAAGCAATGATGCA	KN284896.1_scaffold-10088	33867	1	1.84E-28	22:G>T	22	0.983957	1	0.002717	0.997283	0	0.002717	0	0.00542	0.00271	9.19565	3	1	0	0	0	0	0	0	0	0	0	0	0	0	0	0	0	0	0	0	0	0	0	0	0	0	0	0	0	0	0
23116831|F|0-57:A>C-57:A>C	TGCAGTAATCACAGTAGAAAAGTTAGCAAGAGAAATCAGAGTGGCAAACTGACACCAAGTAAGGTGCAT	TGCAGTAATCACAGTAGAAAAGTTAGCAAGAGAAATCAGAGTGGCAAACTGACACCAAGTAAGGTGCAT	KN287326.1_scaffold-13585	19196	1	8.58E-27	57:A>C	57	0.997326	0.80429	0.664879	0.335121	0.19571	0.469169	0.314816	0.44563	0.380223	7.65879	7.25559	1	2	1	0	2	2	1	2	1	1	2	1	2	2	1	2	1	0	2	1	0	1	0	0	0	0	0	0	0	1
23116835|F|0-43:T>C-43:T>C	TGCAGTAATGCTGCCTAGCCAGTCATTTCCTAGTCTGTACTTGTGCATGAGCGGTTCAGCAGGAATGCC	TGCAGTAATGCTGCCTAGCCAGTCATTTCCTAGTCTGTACTTGTGCATG	KN280384.1_scaffold-3674	587	1	1.35E-17	43:T>C	43	0.973262	0.997253	0.096154	0.903846	0.002747	0.093407	0.005479	0.173817	0.089648	11.58681	5.6087	1	0	0	2	0	0	0	0	0	0	0	0	0	0	0	0	0	2	2	0	0	0	0	0	0	0	2	0	2	0
23116838|F|0-23:T>A-23:T>A	TGCAGTAATTATTGCCTGAGCACTGTATCTTGTGCCTGAAGCAGCAACTGAAGTGACTCAGGGCATGTC	TGCAGTAATTATTGCCTGAGCACTGTATCTTGTGCCTGAAGCAGCAACTGAAGTGACTCAGGGCATGTC	KN280375.1_scaffold-3665	2735	1	1.84E-28	23:T>A	23	0.997326	0.935657	0.30563	0.69437	0.064343	0.241287	0.120406	0.424441	0.272423	7.19495	4.87857	1	0	1	0	2	0	2	0	0	0	0	2	2	2	0	1	1	0	0	0	0	0	0	0	0	0	0	0	2	2
23116840|F|0-16:C>T-16:C>T	TGCAGTAATTGCTATACGGTGTCAGTAGCCACATGGCATGGGGCCACCTGGAGCATGAGCGGTTCAGCA	TGCAGTAATTGCTATACGGTGTCAGTAGCCACATGGCATGGGGCCACCTGGAGCATG	KN287056.1_scaffold-13212	96996	3	6.23E-22	16:C>T	16	1	0.986631	0.109626	0.890374	0.013369	0.096257	0.026381	0.195216	0.110798	10.76458	5.9375	1	0	0	0	0	0	0	0	0	0	0	0	0	2	0	0	0	0	0	0	1	0	0	0	2	0	0	0	0	0
23116851|F|0-63:G>A-63:G>A	TGCAGTACAGAGAAGCACTGAGAGGAGGCAGAGCCATGGGACCCCCCCAGGGCCTGGGTGGGAGGCACA	TGCAGTACAGAGAAGCACTGAGAGGAGGCAGAGCCATGGGACCCCCCCAGGGCCTGGGTGGGAGGCACA	KN281320.1_scaffold-4993	2965	1	1.84E-28	63:G>A	63	1	0.991979	0.104278	0.895722	0.008021	0.096257	0.015914	0.186808	0.101361	10.01499	6.15217	1	0	2	0	0	0	0	0	0	0	0	0	0	0	2	0	0	0	0	0	0	0	0	0	0	0	0	0	0	0
23116854|F|0-24:G>A-24:G>A	TGCAGTACAGCTGTTCTGCTGCCTGGGGGTGACTCCTCCTGGGCACAGTGCAGGGCACAGTTTGTTCTT	TGCAGTACAGCTGTTCTGCTGCCTGGGGGTGACTCCTCCTGGGCACAGTGCAGGGCACAGTTTGTTCTT	KN286131.1_scaffold-11856	186567	1	1.84E-28	24:G>A	24	0.927807	0.997118	0.011527	0.988473	0.002882	0.008646	0.005747	0.022789	0.014268	7.19134	4.8	1	0	0	0	0	0	0	0	0	0	0	0	0	0	0	0	0	0	0	0	0	0	0	0	0	0	0	0	0	0
23116857|F|0-14:G>A-14:G>A	TGCAGTACAGGGATGTTGCAGTATGGGGATGTTTGGACATATTCCAAATGTGTGTCACATGCTCAATAG	TGCAGTACAGGGATGTTGCAGTATGGGGATGTTTGGACATATTCCAAATGTGTGTCACATGCTCAATAG	KN289167.1_scaffold-16226	202469	1	1.84E-28	14:G>A	14	0.975936	0.99726	0.030137	0.969863	0.00274	0.027397	0.005464	0.058457	0.031961	10.41921	3.90909	1	0	0	0	0	0	0	0	0	0	0	2	0	0	0	0	0	0	0	0	0	0	0	0	0	0	0	0	0	0
23116862|F|0-27:T>A-27:T>A	TGCAGTACAGTGAGGAGGAAGGAGGCCTTGAGCATGAGCGGTTCAGCAGGAATGCCGAGACCGATCTCG	TGCAGTACAGTGAGGAGGAAGGAGGCCTTGAGCATG	KN288110.1_scaffold-14719	22893	1	1.04E-10	27:T>A	27	0.997326	1	0.077748	0.922252	0	0.077748	0	0.143406	0.071703	17.27932	8	1	0	0	0	0	0	0	0	0	0	0	0	2	2	0	2	0	0	0	0	2	0	0	0	0	0	0	0	0	0
23116864|F|0-18:G>A-18:G>A	TGCAGTACATGCAGCATCGGGTCCAGCCCACACCTCACGTGCAGCATGAGCGGTTCAGCAGGAATGCCG	TGCAGTACATGCAGCATCGGGTCCAGCCCACACCTCACGTGCAGCATG	KN279782.1_scaffold-2843	15047	1	4.65E-17	18:G>A	18	1	0.991979	0.061497	0.938503	0.008021	0.053476	0.015914	0.115431	0.065672	16.28266	8.2069	1	0	0	0	0	0	0	0	0	0	0	0	0	0	0	0	0	0	0	0	0	0	0	2	0	0	0	0	0	2
23110395|F|0-35:T>C-35:T>C	TGCAGTACATGGAGCCACAGGACAATGCATCCCACTGCAAACTACACTAGCAGAGACATGCACTGCACC	TGCAGTACATGGAGCCACAGGACAATGCATCCCACTGCAAACTACACTAGCAGAGACATGCACTGCACC	KN279519.1_scaffold-2450	169813	1	1.84E-28	35:T>C	35	0.935829	0.997143	0.008571	0.991429	0.002857	0.005714	0.005698	0.016996	0.011347	5.64965	3	1	-	0	0	0	0	-	-	0	0	0	0	0	0	0	0	0	0	0	0	0	0	0	0	0	0	0	0	0	0
23116867|F|0-30:T>C-30:T>C	TGCAGTACCACATACGGCACAGTCATGTGTTCTCCATACTGCAAGGGCATGAGCGGTTCAGCAGGAATG	TGCAGTACCACATACGGCACAGTCATGTGTTCTCCATACTGCAAGGGCATG	KN281992.1_scaffold-5934	145411	1	1.09E-18	30:T>C	30	0.991979	1	0.002695	0.997305	0	0.002695	0	0.005376	0.002688	10.27312	3	1	0	0	0	0	0	0	0	0	0	0	0	0	0	0	0	0	0	0	0	0	0	0	0	0	0	0	0	0	0
23116869|F|0-11:A>G-11:A>G	TGCAGTACCAGAATCAAGACAGATCTTTGCACAAGAGAGACCCTAAAAAGGCAAGTTTCATTTATTAGC	TGCAGTACCAGAATCAAGACAGATCTTTGCACAAGAGAGACCCTAAAAAGGCAAGTTTCATTTATTAGC	KN280448.1_scaffold-3771	429769	1	1.84E-28	11:A>G	11	0.97861	1	0.02459	0.97541	0	0.02459	0	0.047971	0.023985	6.05677	3.44444	1	0	0	0	0	0	0	0	0	0	2	0	0	0	0	0	0	0	0	0	0	0	0	0	0	0	0	0	0	0
23116874|F|0-22:C>A-22:C>A	TGCAGTACCATGATTTAGCTATCTTGTGTCCCCAGCATATCAACAACAGCATGAGCGGTTCAGCAGGAA	TGCAGTACCATGATTTAGCTATCTTGTGTCCCCAGCATATCAACAACAGCATG	KN283507.1_scaffold-8097	66507	1	9.08E-20	22:C>A	22	0.967914	1	0.002762	0.997238	0	0.002762	0	0.00551	0.002755	10.26386	3	1	0	0	0	0	0	0	0	0	0	0	0	0	0	0	0	0	0	0	0	0	0	0	0	0	0	0	0	0	0
23116881|F|0-19:T>C-19:T>C	TGCAGTACCCTGATCCTTTTAAGAGTACCTGGCCCCTGTGCAAGGAGGTAAGCATGAGCGGTTCAGCAG	TGCAGTACCCTGATCCTTTTAAGAGTACCTGGCCCCTGTGCAAGGAGGTAAGCATG	KN282890.1_scaffold-7215	125833	1	2.17E-21	19:T>C	19	0.997326	0.997319	0.021448	0.978552	0.002681	0.018767	0.005348	0.041975	0.023661	11.88675	8.66667	1	0	0	0	0	0	0	0	0	0	0	0	0	0	0	0	0	0	0	0	0	0	0	0	0	0	0	0	0	0
23116886|F|0-18:A>C-18:A>C	TGCAGTACGTGCTCTCCAACACATTGTCTAGCTGCCACATGCATGTGTGCATGAGCGGTTCAGCAGGAA	TGCAGTACGTGCTCTCCAACACATTGTCTAGCTGCCACATGCATGTGTGCATG	KN290508.1_scaffold-18220	126731	1	9.08E-20	18:A>C	18	1	0.986631	0.109626	0.890374	0.013369	0.096257	0.026381	0.195216	0.110798	13.45788	6.86	1	0	0	0	0	0	0	0	0	0	0	0	0	0	0	0	0	0	0	0	0	0	0	0	0	0	0	0	2	0
23116891|F|0-44:G>C-44:G>C	TGCAGTACTACTGCTGACACATAGGTGCACCGAGAGTATTCCAGGTGTATACCCGGCCAGTTTGTGCCC	TGCAGTACTACTGCTGACACATAGGTGCACCGAGAGTATTCCAGGTGTATACCCGGCCAGTTTGTGCCC	JRXG01042299.1_scaffold-8191_1	1404	1	1.84E-28	44:G>C	44	0.989305	1	0.013514	0.986486	0	0.013514	0	0.026662	0.013331	7.96129	2.4	1	0	0	0	0	0	0	0	0	0	0	0	0	0	0	0	0	0	0	0	0	0	0	0	0	0	0	0	0	0
23116895|F|0-26:G>A-26:G>A	TGCAGTACTCTCAGGCAAGTCCAGAGGTGGTATAGGCATGAGCGGTTCAGCAGGAATGCCGAGACCGAT	TGCAGTACTCTCAGGCAAGTCCAGAGGTGGTATAGGCATG	KN284026.1_scaffold-8839	130180	1	8.50E-13	26:G>A	26	0.938503	1	0.002849	0.997151	0	0.002849	0	0.005682	0.002841	9.74487	7	1	0	0	0	0	0	0	0	0	0	0	0	0	0	0	0	0	0	0	0	0	0	0	0	0	0	0	0	0	0
23116898|F|0-11:C>T-11:C>T	TGCAGTACTGCCTGCGTGAAGTAGTGGTGGGTATACAGGCTACAACTCAAGGAACCACAGGATGTGATT	TGCAGTACTGCCTGCGTGAAGTAGTGGTGGGTATACAGGCTACAACTCAAGGAACCACAGGATGTGATT	JRXG01041433.1_scaffold-7988_1	11010	1	1.84E-28	11:C>T	11	0.997326	0.991957	0.0563	0.9437	0.008043	0.048257	0.015956	0.106261	0.061109	10.94624	5.42308	1	0	0	0	0	0	0	0	0	0	0	0	0	0	0	0	0	0	0	0	0	0	0	0	0	0	0	0	0	0
23116899|F|0-56:A>G-56:A>G	TGCAGTACTGCTCATCAGTGCAGAGCACAGTGGGAGTATCACTGCCTTAGTTCTGCATAAGGTACAATG	TGCAGTACTGCTCATCAGTGCAGAGCACAGTGGGAGTATCACTGCCTTAGTTCTGCATAAGGTACAATG	KN279561.1_scaffold-2519	9100	2	1.84E-28	56:A>G	56	0.997326	0.997319	0.024129	0.975871	0.002681	0.021448	0.005348	0.047093	0.02622	12.3141	7.22222	1	0	0	0	0	0	0	0	0	0	0	2	0	0	0	0	0	0	0	0	0	0	0	0	0	0	0	0	0	0
23110396|F|0-24:G>A-24:G>A	TGCAGTACTGCTGAGAAGAACCCGGGGGTTACAGTAGACCATACGCTGAATACAAGCCAACAGCATGAG	TGCAGTACTGCTGAGAAGAACCCGGGGGTTACAGTAGACCATACGCTGAATACAAGCCAACAGCATGAG	KN291635.1_scaffold-19877	374796	1	2.38E-27	24:G>A	24	0.847594	0.990536	0.015773	0.984227	0.009464	0.006309	0.018748	0.031048	0.024898	10.82025	4	1	0	0	0	0	0	0	0	0	0	0	0	0	0	0	0	0	-	-	0	0	0	0	-	0	0	0	0	2	0
23116902|F|0-30:C>T-30:C>T	TGCAGTACTGGGGCACATGGAGTCCACTTCCGAGTCCACCGGGGAGCATGAGCGGTTCAGCAGGAATGC	TGCAGTACTGGGGCACATGGAGTCCACTTCCGAGTCCACCGGGGAGCATG	KN289405.1_scaffold-16573	55469	1	1.82E-16	30:C>T	30	0.997326	0.753351	0.624665	0.375335	0.246649	0.378016	0.371626	0.468917	0.420272	10.23988	10.24658	1	2	2	2	1	0	0	2	1	2	2	0	0	1	1	0	2	2	2	2	1	1	0	2	1	2	2	1	2	0
23116908|F|0-18:C>T-18:C>T	TGCAGTACTGTCTCTCACCACGGGGGCCTCCATCTAGCTCCCACCCCTTCCCTCCCCTACGGACTGACC	TGCAGTACTGTCTCTCACCACGGGGGCCTCCATCTAGCTCCCACCCCTTCCCTCCCCTACGGACTGACC	KN293499.1_scaffold-22654	50384	2	1.84E-28	18:C>T	18	0.997326	1	0.032172	0.967828	0	0.032172	0	0.062273	0.031137	6.44872	3.42857	1	0	0	0	0	0	0	0	0	0	0	0	0	0	0	0	0	0	0	0	0	0	2	0	0	0	2	0	0	0
23116911|F|0-43:A>T-43:A>T	TGCAGTACTTCCTGGAGATGTTGTGGAAACATAATTCATCTGTATGATTTCATTTGATTTGAGCATGAG	TGCAGTACTTCCTGGAGATGTTGTGGAAACATAATTCATCTGTATGATTTCATTTGATTTGAGCATGAG	KN287405.1_scaffold-13701	66766	1	2.38E-27	43:A>T	43	0.989305	1	0.016216	0.983784	0	0.016216	0	0.031907	0.015953	11.26022	3.5	1	0	0	2	0	0	0	0	0	0	0	0	0	0	0	0	0	0	0	0	0	0	0	0	0	0	0	0	0	0
23116912|F|0-40:G>T-40:G>T	TGCAGTACTTCTGCTGCCAAATTTCTGCACCTTCTGGGGAGTCCCACGGGCCAAGTGATGTGGCCCCTA	TGCAGTACTTCTGCTGCCAAATTTCTGCACCTTCTGGGGAGTCCCACGGGCCAAGTGATGTGGCCCCTA	KN290825.1_scaffold-18667	16219	1	1.84E-28	40:G>T	40	0.986631	1	0.00271	0.99729	0	0.00271	0	0.005405	0.002703	5.59395	5	1	0	0	0	0	0	0	0	0	0	0	0	0	0	0	0	0	0	0	0	0	0	0	0	0	0	0	0	0	0
23116927|F|0-46:C>G-46:C>G	TGCAGTAGAGAAGAACTCTAAGTGAATGAAGTGGATCAGATTGGTTCGCTTGCTTTCCTGGTGGAACTA	TGCAGTAGAGAAGAACTCTAAGTGAATGAAGTGGATCAGATTGGTTCGCTTGCTTTCCTGGTGGAACTA	KN281979.1_scaffold-5915	14368	1	1.84E-28	46:C>G	46	0.997326	1	0.024129	0.975871	0	0.024129	0	0.047093	0.023546	10.22698	6.5	1	0	0	0	0	0	0	0	0	0	0	2	0	0	0	0	0	0	0	0	0	0	0	0	0	0	0	0	0	0
23116928|F|0-8:A>C-8:A>C	TGCAGTAGAGACATTAATAGCTCTTTTTTAACTCACTTTAAAAATATTCCAGGAATGAATCTTCACTCT	TGCAGTAGAGACATTAATAGCTCTTTTTTAACTCACTTTAAAAATATTCCAGGAATGAATCTTCACTCT	KN286484.1_scaffold-12381	9008	1	1.84E-28	8:A>C	8	0.981283	1	0.016349	0.983651	0	0.016349	0	0.032163	0.016081	6.5671	4.5	1	0	0	0	0	0	0	0	0	0	0	0	0	0	0	0	0	0	0	-	0	0	0	0	0	0	0	0	0	2
23116940|F|0-23:T>A-23:T>A	TGCAGTAGCAGCAGTGCTGCTGCTTGGAGCTTGGCCAGCAACTGGAGCATAGCTCTGGCCAGTCAGCCT	TGCAGTAGCAGCAGTGCTGCTGCTTGGAGCTTGGCCAGCAACTGGAGCATAGCTCTGGCCAGTCAGCCT	KN280738.1_scaffold-4158	194724	1	1.84E-28	23:T>A	23	0.997326	1	0.002681	0.997319	0	0.002681	0	0.005348	0.002674	9.75427	3	1	2	0	0	0	0	0	0	0	0	0	0	0	0	0	0	0	0	0	0	0	0	0	0	0	0	0	0	0	0
23116942|F|0-18:C>T-18:C>T	TGCAGTAGCAGCCAGCAGCGGGCCATTGGGGCACTCATGGCCCACTGCTGGCAGAGACCCCCAGCAGCA	TGCAGTAGCAGCCAGCAGCGGGCCATTGGGGCACTCATGGCCCACTGCTGGCAGAGACCCCCAGCAGCA	KN278936.1_scaffold-1615	79828	2	1.84E-28	18:C>T	18	0.997326	1	0.02681	0.97319	0	0.02681	0	0.052182	0.026091	9.74573	4.72727	1	0	0	0	2	0	0	0	0	0	0	0	0	0	0	0	0	0	0	0	0	0	0	0	0	0	0	0	0	0
23116956|F|0-8:C>T-8:C>T	TGCAGTAGCGGCAGGAGTGTCTCTGCTCAGAATCTGTGCATGAGCGGTTCAGCAGGAATGCCGAGACCG	TGCAGTAGCGGCAGGAGTGTCTCTGCTCAGAATCTGTGCATG	KN280230.1_scaffold-3474	39281	1	7.45E-14	8:C>T	8	1	0.965241	0.23262	0.76738	0.034759	0.197861	0.067102	0.357016	0.212059	14.20925	8.88571	1	0	0	0	0	2	2	0	0	0	0	0	2	0	0	0	2	0	0	0	0	0	0	0	0	0	2	0	2	0
23116957|F|0-18:C>T-18:C>T	TGCAGTAGCTCCCAGCATCGCAAGTGAATGTTAAAGCAAGCTGCATGAGCGGTTCAGCAGGAATGCCGA	TGCAGTAGCTCCCAGCATCGCAAGTGAATGTTAAAGCAAGCTGCATG	KN280429.1_scaffold-3739	171599	1	1.60E-16	18:C>T	18	0.975936	1	0.010959	0.989041	0	0.010959	0	0.021678	0.010839	9.2549	6.5	1	0	0	0	0	0	0	0	0	0	0	0	0	0	0	0	0	0	0	0	0	0	0	0	0	0	0	0	0	0
23116961|F|0-21:A>G-21:A>G	TGCAGTAGCTGTGGCTCCCGCAAGCAGACCCTGACCTGTCTGGCAGCTGGGCATGAGCGGTTCAGCAGG	TGCAGTAGCTGTGGCTCCCGCAAGCAGACCCTGACCTGTCTGGCAGCTGGGCATG	KN293858.1_scaffold-23186	9630	1	7.54E-21	21:A>G	21	1	0.991979	0.117647	0.882353	0.008021	0.109626	0.015914	0.207612	0.111763	11.30621	6.06122	1	0	0	0	0	0	0	0	2	0	0	2	2	2	0	0	2	0	0	0	0	2	0	0	0	0	2	0	0	2
23116964|F|0-49:T>A-49:T>A	TGCAGTAGGAATTCTAGAGTATGTTAACACCCAGCAGGCCCCAGACACCTTAGTCCTGTCTGCATGAGC	TGCAGTAGGAATTCTAGAGTATGTTAACACCCAGCAGGCCCCAGACACCTTAGTCCTGTCTGCATGAGC	KN278421.1_scaffold-888	338866	1	8.58E-27	49:T>A	49	0.981283	1	0.00545	0.99455	0	0.00545	0	0.01084	0.00542	7.29284	5	1	0	0	0	0	0	0	0	0	0	0	0	0	0	0	0	0	0	0	0	0	0	0	0	0	0	0	0	0	0
23116965|F|0-31:T>C-31:T>C	TGCAGTAGGACAAACCTTTTGAGCCTGGAGGTTACAATTCAAGCATGAGCGGTTCAGCAGGAATGCCGA	TGCAGTAGGACAAACCTTTTGAGCCTGGAGGTTACAATTCAAGCATG	KN293852.1_scaffold-23177	158681	1	1.60E-16	31:T>C	31	0.994652	1	0.008065	0.991935	0	0.008065	0	0.015999	0.007999	13.25751	7	1	0	0	0	0	0	0	0	0	0	0	0	0	0	0	0	0	0	0	0	0	0	0	0	0	0	0	0	0	0
23116966|F|0-13:C>G-13:C>G	TGCAGTAGGAGAGCAGCAAGGGGTGGAAAAGCCTGGGCATGAGCGGTTCAGCAGGAATGCCGAGACCGA	TGCAGTAGGAGAGCAGCAAGGGGTGGAAAAGCCTGGGCATG	KN284231.1_scaffold-9132	767560	1	2.52E-13	13:C>G	13	0.949198	0.997183	0.002817	0.997183	0.002817	0	0.005618	0.005618	0.005618	9.05215	5	1	0	0	0	0	0	0	0	0	0	0	0	0	0	0	0	0	0	0	0	0	0	0	0	0	0	0	0	0	0
23116968|F|0-59:G>A-59:G>A	TGCAGTAGGATGCCAGCCAGGAGACGTTGGAAATATCTGGAGCCCCGGGGCCGAGGTGGGGGATGCATG	TGCAGTAGGATGCCAGCCAGGAGACGTTGGAAATATCTGGAGCCCCGGGGCCGAGGTGGGGGATGCATG	KN281137.1_scaffold-4726	504363	1	1.84E-28	59:G>A	59	1	1	0.032086	0.967914	0	0.032086	0	0.062112	0.031056	11.9383	6	1	0	0	0	0	0	0	0	0	0	0	0	2	0	0	2	0	0	0	0	0	0	0	0	0	0	0	0	0	0
23116973|F|0-49:G>A-49:G>A	TGCAGTAGGCAGCCTGCCTAGAATTGGAGAACCCAGAGGGCTAAGGGCTGGCACAGAATGCATAAGACA	TGCAGTAGGCAGCCTGCCTAGAATTGGAGAACCCAGAGGGCTAAGGGCTGGCACAGAATGCATAAGACA	KN281079.1_scaffold-4629	34105	1	1.84E-28	49:G>A	49	0.994652	1	0.002688	0.997312	0	0.002688	0	0.005362	0.002681	6.89936	4	1	0	0	0	0	0	0	0	0	0	0	0	0	0	0	0	0	0	0	0	0	0	0	0	0	0	0	0	0	0
23116975|F|0-61:C>G-61:C>G	TGCAGTAGGCTCACAGGCATTTGGCAGTGCCTCGTTTAAGATGAGCCTGCAAAAGCATATGCAAATAAT	TGCAGTAGGCTCACAGGCATTTGGCAGTGCCTCGTTTAAGATGAGCCTGCAAAAGCATATGCAAATAAT	KN284331.1_scaffold-9279	174033	1	1.84E-28	61:C>G	61	0.994652	1	0.008065	0.991935	0	0.008065	0	0.015999	0.007999	8.07495	3.25	1	0	0	0	0	0	0	0	0	0	0	0	0	0	0	0	0	0	0	0	0	0	0	0	0	0	0	0	0	0
23116983|F|0-19:A>G-19:A>G	TGCAGTAGGTGGTGAGCAGACTGCAAACAGCTGTGCCAGGCTCCAGAGCCCTGACACCAGCTCCATGGC	TGCAGTAGGTGGTGAGCAGACTGCAAACAGCTGTGCCAGGCTCCAGAGCCCTGACACCAGCTCCATGGC	KN282169.1_scaffold-6183	10406	2	1.84E-28	19:A>G	19	1	0.997326	0.034759	0.965241	0.002674	0.032086	0.005333	0.067102	0.036218	11.258	4.68421	1	0	0	0	0	0	2	0	0	0	0	0	0	0	0	0	0	2	2	0	0	0	0	0	0	0	0	0	0	0
23116986|F|0-61:C>A-61:C>A	TGCAGTAGGTTCCCCTTTTTAATTAAGGGCCACCCTGTGCTTCTGCTGCTGCTGTCCCACACAGCCAGC	TGCAGTAGGTTCCCCTTTTTAATTAAGGGCCACCCTGTGCTTCTGCTGCTGCTGTCCCACACAGCCAGC	KN280112.1_scaffold-3309	156632	1	1.84E-28	61:C>A	61	0.997326	0.997319	0.024129	0.975871	0.002681	0.021448	0.005348	0.047093	0.02622	7.74518	3.81818	1	0	0	0	0	0	0	0	0	0	0	0	0	0	0	0	0	0	0	0	0	0	0	0	0	0	0	0	0	0
23116988|F|0-21:C>T-21:C>T	TGCAGTAGTACCACAGCCTAGCCAGTCATTCTACAGTCTGCATTTGTGCATGAGCGGTTCAGCAGGAAT	TGCAGTAGTACCACAGCCTAGCCAGTCATTCTACAGTCTGCATTTGTGCATG	KN289333.1_scaffold-16470	135922	1	3.14E-19	21:C>T	21	0.991979	0.997305	0.037736	0.962264	0.002695	0.03504	0.005376	0.072624	0.039	14.60515	8.05556	1	0	0	0	0	0	0	0	0	0	2	1	0	0	0	0	0	0	0	0	0	0	0	0	0	0	0	0	0	0
23116990|F|0-24:G>A-24:G>A	TGCAGTAGTAGCAGCAGCAGCCCTGTTTAGAAGCTACATGTGTTGGCAGGGGCCTCCTGTGGGCATGGG	TGCAGTAGTAGCAGCAGCAGCCCTGTTTAGAAGCTACATGTGTTGGCAGGGGCCTCCTGTGGGCATGGG	KN279962.1_scaffold-3093	130906	1	1.84E-28	24:G>A	24	1	0.911765	0.55615	0.44385	0.088235	0.467914	0.1609	0.493694	0.327297	8.58508	6.21212	1	2	0	0	2	0	0	0	2	0	2	2	2	2	0	2	0	2	2	2	2	2	2	2	1	0	0	2	2	0
23116992|F|0-30:C>T-30:C>T	TGCAGTAGTAGGACTTTAGGTGGCTAAGTACGTTTTTGCCAGAAAACGTAGGGCACTAAAGCAGACATT	TGCAGTAGTAGGACTTTAGGTGGCTAAGTACGTTTTTGCCAGAAAACGTAGGGCACTAAAGCAGACATT	JRXG01110962.1_scaffold-23034_1	214	1	1.84E-28	30:C>T	30	0.983957	1	0.01087	0.98913	0	0.01087	0	0.021503	0.010751	8.52826	4.5	1	0	0	0	0	0	0	0	0	0	0	2	0	0	0	0	0	0	0	0	0	0	0	0	0	0	0	0	2	0
23116994|F|0-23:A>T-23:A>T	TGCAGTAGTCAGGCCAGGGTGAAAGGTCCATATATTTATTGCTACCACCATTGTTAAGAAGTGCTGTCC	TGCAGTAGTCAGGCCAGGGTGAAAGGTCCATATATTTATTGCTACCACCATTGTTAAGAAGTGCTGTCC	JRXG01105196.1_scaffold-21687_1	12713	1	1.84E-28	23:A>T	23	0.981283	0.986376	0.054496	0.945504	0.013624	0.040872	0.026877	0.103052	0.064964	8.01987	6.57692	1	0	0	0	0	0	0	0	0	0	0	0	0	0	0	0	0	0	0	0	0	0	0	0	0	0	0	0	0	0
23116998|F|0-20:T>G-20:T>G	TGCAGTAGTGACATAACCATTATGGCTGCTTGCAGACATTTAAAAAACCTCCAAAACAGCGCTTTAAAC	TGCAGTAGTGACATAACCATTATGGCTGCTTGCAGACATTTAAAAAACCTCCAAAACAGCGCTTTAAAC	KN279739.1_scaffold-2779	328859	1	1.84E-28	20:T>G	20	0.994652	1	0.002688	0.997312	0	0.002688	0	0.005362	0.002681	10.49465	3	1	0	0	0	0	0	0	0	0	0	0	0	0	0	0	0	0	0	0	0	0	0	0	0	0	0	0	0	0	0
23117006|F|0-36:T>A-36:T>A	TGCAGTAGTGTTTGGGACCAGGTGGCATGAAGCAGGTAGGAAGGCATGACAGAACTGTTTAACCCTTAA	TGCAGTAGTGTTTGGGACCAGGTGGCATGAAGCAGGTAGGAAGGCATGACAGAACTGTTTAACCCTTAA	KN279134.1_scaffold-1896	131561	1	1.84E-28	36:T>A	36	0.989305	0.959459	0.221622	0.778378	0.040541	0.181081	0.077794	0.345011	0.211402	6.787	4.41237	1	2	0	0	0	0	0	0	2	2	2	0	0	0	0	0	1	2	0	0	0	0	0	0	0	1	0	0	0	0
23117009|F|0-24:T>A-24:T>A	TGCAGTAGTTTCTGGGGACTTTTTTAAAAGTCCTCAAAGCACCCAAGAATCTCCACTTCCCCTCTGTAC	TGCAGTAGTTTCTGGGGACTTTTTTAAAAGTCCTCAAAGCACCCAAGAATCTCCACTTCCCCTCTGTAC	KN278172.1_scaffold-535	284408	1	1.84E-28	24:T>A	24	0.997326	0.983914	0.155496	0.844504	0.016086	0.13941	0.031654	0.262634	0.147144	7.90632	5.15278	1	0	0	0	0	0	0	0	2	0	0	0	0	0	0	0	0	0	0	2	0	0	2	2	2	0	0	0	0	0
23117011|F|0-15:T>G-15:T>G	TGCAGTATACATTTCTAAAAGGAGCAGGTTGCATGACTTAAATTACTTGTCCTAGTTTTTCAAAAACCT	TGCAGTATACATTTCTAAAAGGAGCAGGTTGCATGACTTAAATTACTTGTCCTAGTTTTTCAAAAACCT	KN279424.1_scaffold-2306	191404	1	1.84E-28	15:T>G	15	0.962567	1	0.008333	0.991667	0	0.008333	0	0.016528	0.008264	6.81737	3	1	0	0	0	0	0	0	0	0	0	0	0	0	0	0	0	0	0	0	0	0	0	0	-	0	0	0	0	0	0
23117018|F|0-49:C>T-49:C>T	TGCAGTATCACACTGAAGGCTCATGTTCATCTTGTGGTCAATCATGACCCCCGAGTCCCTTTTGTCCAA	TGCAGTATCACACTGAAGGCTCATGTTCATCTTGTGGTCAATCATGACCCCCGAGTCCCTTTTGTCCAA	KN279544.1_scaffold-2487	270548	13	1.84E-28	49:C>T	49	0.997326	0.997319	0.053619	0.946381	0.002681	0.050938	0.005348	0.101489	0.053418	8.8129	5.51724	1	0	0	0	0	0	0	0	0	0	0	0	0	0	0	0	0	2	0	0	0	0	0	0	0	0	2	0	0	2
23117030|F|0-45:C>T-45:C>T	TGCAGTATCTCTGTGCTCCCCTTGACACAGAAATTCCTGAAAAACCCATACATCTCCCAGGCTTTCCAA	TGCAGTATCTCTGTGCTCCCCTTGACACAGAAATTCCTGAAAAACCCATACATCTCCCAGGCTTTCCAA	JRXG01040048.1_scaffold-7741_1	8956	1	1.84E-28	45:C>T	45	1	1	0.165775	0.834225	0	0.165775	0	0.276588	0.138294	10.15598	4.2375	1	0	0	0	0	2	0	0	2	0	2	2	0	0	2	0	2	0	0	0	0	0	0	0	0	0	0	0	2	0
23117037|F|0-7:T>G-7:T>G	TGCAGTATGAATATGAACTGGCAGTGCTATATTGTAGACAGTAGGGCAAATAATATTCTGGCATGAGCG	TGCAGTATGAATATGAACTGGCAGTGCTATATTGTAGACAGTAGGGCAAATAATATTCTGGCATG	KN291662.1_scaffold-19917	185430	1	2.80E-26	7:T>G	7	0.997326	1	0.002681	0.997319	0	0.002681	0	0.005348	0.002674	11.34615	4	1	0	0	0	0	0	0	0	0	0	0	0	2	0	0	0	0	0	0	0	0	0	0	0	0	0	0	0	0	0
23117040|F|0-7:T>G-7:T>G	TGCAGTATGCAGCCTGTATGGTGTGCAGCCTGATGTGCATGAGCGGTTCAGCAGGAATGCCGAGACCGA	TGCAGTATGCAGCCTGTATGGTGTGCAGCCTGATGTGCATG	KN277979.1_scaffold-277	15085	1	2.52E-13	7:T>G	7	1	0.989305	0.112299	0.887701	0.010695	0.101604	0.021162	0.199377	0.110269	14.84731	7.06	1	0	0	0	0	0	0	0	0	0	2	0	0	0	0	0	0	0	0	0	0	0	0	0	0	0	0	0	2	0
23117047|F|0-32:G>A-32:G>A	TGCAGTATGGCAATCTAGCCAGTCATTCCCCAGTCTGTATTTATGCATGAGCGGTTCAGCAGGAATGCC	TGCAGTATGGCAATCTAGCCAGTCATTCCCCAGTCTGTATTTATGCATG	KN286840.1_scaffold-12899	28158	8	1.35E-17	32:G>A	32	0.965241	0.99446	0.030471	0.969529	0.00554	0.024931	0.011019	0.059085	0.035052	13.58613	7	1	0	0	0	0	0	0	0	0	0	0	0	0	0	0	0	0	0	0	0	0	0	0	0	0	0	0	0	0	0
23117049|F|0-44:C>T-44:C>T	TGCAGTATGGCATGGCTGGAGCCTTGCAGGTCAGGAAGGAGGCACCGGTGACACAGAGCAGGGGCGTTA	TGCAGTATGGCATGGCTGGAGCCTTGCAGGTCAGGAAGGAGGCACCGGTGACACAGAGCAGGGGCGTTA	KN279754.1_scaffold-2802	168195	1	1.84E-28	44:C>T	44	0.994652	0.997312	0.026882	0.973118	0.002688	0.024194	0.005362	0.052318	0.02884	6.08621	3.81818	1	0	0	0	0	0	0	0	0	0	0	0	0	0	0	0	0	0	0	0	0	0	0	0	0	0	0	0	0	0
23117053|F|0-38:A>G-38:A>G	TGCAGTATGTGTGCCACACGGGGCATGGGAAGCCTCTGAATGCGGCATGAGCGGTTCAGCAGGAATGCC	TGCAGTATGTGTGCCACACGGGGCATGGGAAGCCTCTGAATGCGGCATG	KN288085.1_scaffold-14684	5430	1	1.35E-17	38:A>G	38	0.989305	1	0.013514	0.986486	0	0.013514	0	0.026662	0.013331	15.25376	7.4	1	0	0	0	0	0	0	0	0	0	0	0	0	0	0	0	0	0	0	0	0	0	0	0	0	0	0	0	0	0
23117054|F|0-61:C>T-61:C>T	TGCAGTATGTTGAGCTGAGTCAGAGCAGCCCTGGCATCCAGCTGGCCAGCCCAAGGCTGCTCGTGCAGC	TGCAGTATGTTGAGCTGAGTCAGAGCAGCCCTGGCATCCAGCTGGCCAGCCCAAGGCTGCTCGTGCAGC	KN287629.1_scaffold-14036	18867	1	1.84E-28	61:C>T	61	0.973262	1	0.005495	0.994505	0	0.005495	0	0.010929	0.005464	4.36044	3	1	0	0	0	0	0	0	0	0	0	0	0	0	0	0	0	0	0	0	0	0	0	0	0	0	0	0	0	0	0
23117070|F|0-41:T>C-41:T>C	TGCAGTCAAACTATGCACTAAACTTTAATGACATTAGAGATTGAATGCATGAGCGGTTCAGCAGGAATG	TGCAGTCAAACTATGCACTAAACTTTAATGACATTAGAGATTGAATGCATG	KN278375.1_scaffold-824	90883	1	1.09E-18	41:T>C	41	0.946524	0.983051	0.169492	0.830508	0.016949	0.152542	0.033324	0.281528	0.157426	11.98845	7.07595	1	0	0	0	0	0	0	0	0	0	0	0	0	0	2	0	0	0	0	0	0	1	0	0	-	0	0	0	0	0
23117075|F|0-6:C>T-6:C>T	TGCAGTCAACCAGATGCAATTCAACAATGACAAATGCAAAGTCCTGCACTTAGGATGGAATAATTGCAT	TGCAGTCAACCAGATGCAATTCAACAATGACAAATGCAAAGTCCTGCACTTAGGATGGAATAATTGCAT	KN281928.1_scaffold-5851	59305	4	1.84E-28	6:C>T	6	0.991979	1	0.002695	0.997305	0	0.002695	0	0.005376	0.002688	8.96559	3	1	0	0	0	0	0	0	0	0	0	0	0	0	0	0	0	0	0	0	0	0	0	0	0	0	0	0	0	0	0
23117080|F|0-20:G>C-20:G>C	TGCAGTCAATCGCCAAGCCAGGGGGGTGAGGGACCCCCCAGCATGAGCGGTTCAGCAGGAATGCCGAGA	TGCAGTCAATCGCCAAGCCAGGGGGGTGAGGGACCCCCCAGCATG	KN286884.1_scaffold-12963	221427	1	1.88E-15	20:G>C	20	1	1	0.002674	0.997326	0	0.002674	0	0.005333	0.002667	11.25957	3	1	0	0	0	0	0	0	0	0	0	0	0	0	0	0	0	0	0	0	0	0	0	0	0	0	0	0	0	0	0
23117083|F|0-29:G>A-29:G>A	TGCAGTCAATTGCCAAGCCGAGGGGACACGGGGGGGCCCCCTAGCATGAGCGGTTCAGCAGGAATGCCG	TGCAGTCAATTGCCAAGCCGAGGGGACACGGGGGGGCCCCCTAGCATG	KN289174.1_scaffold-16243	1869	1	4.65E-17	29:G>A	29	0.997326	0.989276	0.099196	0.900804	0.010724	0.088472	0.021218	0.178712	0.099965	10.5705	6.51163	1	0	0	0	0	0	0	0	0	0	0	0	0	0	0	0	0	0	0	0	0	2	0	0	2	2	0	0	0	0
23117085|F|0-18:C>T-18:C>T	TGCAGTCACACCCAGGCCCCCAAGATATGCCAGGCAGGGTCCAGCACTGGGCAGCTTCTGGGCTGGCAA	TGCAGTCACACCCAGGCCCCCAAGATATGCCAGGCAGGGTCCAGCACTGGGCAGCTTCTGGGCTGGCAA	KN284792.1_scaffold-9945	426581	1	1.84E-28	18:C>T	18	0.997326	1	0.005362	0.994638	0	0.005362	0	0.010666	0.005333	6.98932	3.75	1	0	0	0	0	0	0	0	0	0	0	0	0	0	0	0	0	0	0	0	0	0	0	0	0	0	0	0	0	0
23117090|F|0-11:A>G-11:A>G	TGCAGTCACCCACACCGAGTATAGACCTGGCCCAGCCTCCCAGCCAGGAAGATCCAGGCATCAGCTCCA	TGCAGTCACCCACACCGAGTATAGACCTGGCCCAGCCTCCCAGCCAGGAAGATCCAGGCATCAGCTCCA	KN286642.1_scaffold-12613	18305	1	1.84E-28	11:A>G	11	0.986631	0.99729	0.01355	0.98645	0.00271	0.01084	0.005405	0.026733	0.016069	5.45	3.5	1	0	0	0	0	0	0	0	0	0	0	0	0	-	0	0	0	0	0	0	0	0	0	0	0	0	0	0	0	0
23117096|F|0-46:C>T-46:C>T	TGCAGTCACGGGGTTTACTTTAGGTGGTGTCATTACAGATCAGAAGCGGTGCATGAGCGGTTCAGCAGG	TGCAGTCACGGGGTTTACTTTAGGTGGTGTCATTACAGATCAGAAGCGGTGCATG	KN282297.1_scaffold-6359	192685	1	7.54E-21	46:C>T	46	0.994652	1	0.005376	0.994624	0	0.005376	0	0.010695	0.005347	11.66164	6	1	0	0	0	0	0	0	0	0	0	0	0	0	0	0	0	0	0	0	0	0	0	0	0	0	0	0	0	0	0
23117097|F|0-39:G>A-39:G>A	TGCAGTCACGGGTATGTGTGTGTGTGACTACAGGTGCACGCACATGCATGTATACATGCATGTAGGTCT	TGCAGTCACGGGTATGTGTGTGTGTGACTACAGGTGCACGCACATGCATGTATACATGCATGTAGGTCT	KN281154.1_scaffold-4746	186702	1	1.84E-28	39:G>A	39	1	0.975936	0.168449	0.831551	0.024064	0.144385	0.04697	0.280148	0.163559	16.01532	10.75949	1	0	0	0	0	0	0	0	0	0	0	0	0	0	0	0	0	0	0	0	0	0	0	0	0	0	0	0	0	0
23117104|F|0-46:G>A-46:G>A	TGCAGTCACTTGCAATCCTGGGAGAACTAGGTCCAGTCACATGAAAGGTAAGCCTTGTCCCAACGCATT	TGCAGTCACTTGCAATCCTGGGAGAACTAGGTCCAGTCACATGAAAGGTAAGCCTTGTCCCAACGCATT	KN288616.1_scaffold-15449	30142	1	8.58E-27	46:G>A	46	1	0.983957	0.227273	0.772727	0.016043	0.21123	0.031571	0.35124	0.191405	9.21814	4.84466	1	0	1	0	0	0	0	2	0	0	0	0	0	0	2	0	0	0	0	2	2	2	2	0	0	0	0	0	0	0
23117105|F|0-37:T>A-37:T>A	TGCAGTCAGACACAAGCACACAGGTAAACAGAATACCTCTGAATCTGGCTGGGTGTCCAGCTGACATCC	TGCAGTCAGACACAAGCACACAGGTAAACAGAATACCTCTGAATCTGGCTGGGTGTCCAGCTGACATCC	KN292849.1_scaffold-21670	40993	10	1.84E-28	37:T>A	37	0.994652	0.994624	0.075269	0.924731	0.005376	0.069892	0.010695	0.139207	0.074951	7.875	3.35484	1	0	0	0	0	0	0	2	0	2	0	0	2	0	0	0	0	0	0	0	0	0	0	1	0	0	2	0	0	0
23117106|F|0-8:G>A-8:G>A	TGCAGTCAGACAGCTGGCTGGGGTTGTGCTGGAAGAAAGGAGCTAATGCCTCTGGGCATTTATACGCAT	TGCAGTCAGACAGCTGGCTGGGGTTGTGCTGGAAGAAAGGAGCTAATGCCTCTGGGCATTTATACGCAT	KN277802.1_scaffold-32	712	1	1.84E-28	8:G>A	8	0.991979	0.986523	0.150943	0.849057	0.013477	0.137466	0.026591	0.256319	0.141455	8.40959	5.95714	1	0	0	0	0	0	1	0	0	2	0	0	0	1	0	2	2	1	1	0	0	2	0	0	2	0	0	0	0	2
[truncated: 10,381 more rows]
[truncated: 163 more columns]
