# Supplementary material for: Translocation, genetic structure and homing ability confirm geographic barriers disrupt saltwater crocodile movement and dispersal
Source: PLoS One. 2019 Aug 28;14(8):e0205862. doi: 10.1371/journal.pone.0205862 (PMC6713319; doi:10.1371/journal.pone.0205862)
Supplement: S1 File — (ZIP) [file pone.0205862.s001.zip › Cobourg croc paper genetic analyses/Sampling locations for Cobourg paper genetics.xlsx]

## Sheet: Site nums
3123	192	19	7	9	2	7	9	2	2	40	2	11	11	16	17	40	3	1	10	2	1
			DEMED East Alligator River (Janamba)	Janamba Coburg Peninsula	Janamba Donalds Lagoon Station	Janamba Muk Muk Mugalimba	Janamba Swim Creek Station	Walker Beatrice Hill Station	WHNT Adelaide River Station	WHNT Arafura Swamp Darbilla Creek	WHNT Elizabeth Downs Station	WHNT King River Goomadeer River	WHNT Labelle Downs Station	WHNT Litchfield Station	WHNT Maningrida Bawinanga Liverpool Rv Blyth Rv	WHNT Tiwi Islands	WHNT Wagait Finniss River	WHNT Welltree Station	WMI Djukbinj National Park	WMI Harrison Dam	WMI Koolpinyah Station
ID	NAME_1	L1a	L1b		Long	Lat
CP0003	DEMED East Alligator River (Janamba)	1	1		132.859	-12.0876
CP0004	DEMED East Alligator River (Janamba)	1	1		132.859	-12.0876
CP0217	DEMED East Alligator River (Janamba)	1	1		132.859	-12.0876
CP0218	DEMED East Alligator River (Janamba)	1	1		132.859	-12.0876
CP0219	DEMED East Alligator River (Janamba)	1	1		132.859	-12.0876
CP0229	DEMED East Alligator River (Janamba)	1	1		132.859	-12.0876
CP0230	DEMED East Alligator River (Janamba)	1	1		132.859	-12.0876
CP0002	Janamba Coburg Peninsula	1	1		132.245	-11.3484
CP0008	Janamba Coburg Peninsula	1	1		132.245	-11.3484
CP0221	Janamba Coburg Peninsula	1	1		132.245	-11.3484
CP0222	Janamba Coburg Peninsula	1	1		132.245	-11.3484
CP0223	Janamba Coburg Peninsula	1	1		132.245	-11.3484
CP0231	Janamba Coburg Peninsula	1	1		132.245	-11.3484
CP0232	Janamba Coburg Peninsula	1	1		132.245	-11.3484
CP0234	Janamba Coburg Peninsula	1	1		132.245	-11.3484
CP0235	Janamba Coburg Peninsula	1	1		132.245	-11.3484
CP0001	Janamba Donalds Lagoon Station	1	1		131.25	-12.7476
CP0007	Janamba Donalds Lagoon Station	1	1		131.25	-12.7476
CP0220	Janamba Muk Muk Mugalimba	1	1		130.366	-13.015
CP0225	Janamba Muk Muk Mugalimba	1	1		130.366	-13.015
CP0233	Janamba Muk Muk Mugalimba	1	1		130.366	-13.015
CP0236	Janamba Muk Muk Mugalimba	1	1		130.366	-13.015
CP0237	Janamba Muk Muk Mugalimba	1	1		130.366	-13.015
CP0238	Janamba Muk Muk Mugalimba	1	1		130.366	-13.015
CP0239	Janamba Muk Muk Mugalimba	1	1		130.366	-13.015
CP0005	Janamba Swim Creek Station	1	1		131.816	-12.336
CP0006	Janamba Swim Creek Station	1	1		131.816	-12.336
CP0009	Janamba Swim Creek Station	1	1		131.816	-12.336
CP0010	Janamba Swim Creek Station	1	1		131.816	-12.336
CP0224	Janamba Swim Creek Station	1	1		131.816	-12.336
CP0226	Janamba Swim Creek Station	1	1		131.816	-12.336
CP0227	Janamba Swim Creek Station	1	1		131.816	-12.336
CP0228	Janamba Swim Creek Station	1	1		131.816	-12.336
CP0240	Janamba Swim Creek Station	1	1		131.816	-12.336
CP0206	Walker Beatrice Hill Station	1	1		131.28	-12.675
CP0398	Walker Beatrice Hill Station	1	1		131.28	-12.675
CP0177	WHNT Adelaide River Station	1	1		131.309	-12.8135
CP0296	WHNT Adelaide River Station	1	1		131.309	-12.8135
CP0026	WHNT Arafura Swamp Darbilla Creek	1	1		135.006	-12.5272
CP0027	WHNT Arafura Swamp Darbilla Creek	1	1		135.006	-12.5272
CP0028	WHNT Arafura Swamp Darbilla Creek	1	1		135.006	-12.5272
CP0031	WHNT Arafura Swamp Darbilla Creek	1	1		135.006	-12.5272
CP0040	WHNT Arafura Swamp Darbilla Creek	1	1		135.006	-12.5272
CP0042	WHNT Arafura Swamp Darbilla Creek	1	1		135.006	-12.5272
CP0045	WHNT Arafura Swamp Darbilla Creek	1	1		135.006	-12.5272
CP0047	WHNT Arafura Swamp Darbilla Creek	1	1		135.006	-12.5272
CP0051	WHNT Arafura Swamp Darbilla Creek	1	1		135.006	-12.5272
CP0055	WHNT Arafura Swamp Darbilla Creek	1	1		135.006	-12.5272
CP0063	WHNT Arafura Swamp Darbilla Creek	1	1		135.006	-12.5272
CP0065	WHNT Arafura Swamp Darbilla Creek	1	1		135.006	-12.5272
CP0070	WHNT Arafura Swamp Darbilla Creek	1	1		135.006	-12.5272
CP0072	WHNT Arafura Swamp Darbilla Creek	1	1		135.006	-12.5272
CP0075	WHNT Arafura Swamp Darbilla Creek	1	1		135.006	-12.5272
CP0076	WHNT Arafura Swamp Darbilla Creek	1	1		135.006	-12.5272
CP0077	WHNT Arafura Swamp Darbilla Creek	1	1		135.006	-12.5272
CP0163	WHNT Arafura Swamp Darbilla Creek	1	1		135.006	-12.5272
CP0166	WHNT Arafura Swamp Darbilla Creek	1	1		135.006	-12.5272
CP0168	WHNT Arafura Swamp Darbilla Creek	1	1		135.006	-12.5272
CP0172	WHNT Arafura Swamp Darbilla Creek	1	1		135.006	-12.5272
CP0173	WHNT Arafura Swamp Darbilla Creek	1	1		135.006	-12.5272
CP0174	WHNT Arafura Swamp Darbilla Creek	1	1		135.006	-12.5272
CP0175	WHNT Arafura Swamp Darbilla Creek	1	1		135.006	-12.5272
CP0180	WHNT Arafura Swamp Darbilla Creek	1	1		135.006	-12.5272
CP0181	WHNT Arafura Swamp Darbilla Creek	1	1		135.006	-12.5272
CP0182	WHNT Arafura Swamp Darbilla Creek	1	1		135.006	-12.5272
CP0183	WHNT Arafura Swamp Darbilla Creek	1	1		135.006	-12.5272
CP0184	WHNT Arafura Swamp Darbilla Creek	1	1		135.006	-12.5272
CP0187	WHNT Arafura Swamp Darbilla Creek	1	1		135.006	-12.5272
CP0267	WHNT Arafura Swamp Darbilla Creek	1	1		135.006	-12.5272
CP0271	WHNT Arafura Swamp Darbilla Creek	1	1		135.006	-12.5272
CP0273	WHNT Arafura Swamp Darbilla Creek	1	1		135.006	-12.5272
CP0275	WHNT Arafura Swamp Darbilla Creek	1	1		135.006	-12.5272
CP0278	WHNT Arafura Swamp Darbilla Creek	1	1		135.006	-12.5272
CP0281	WHNT Arafura Swamp Darbilla Creek	1	1		135.006	-12.5272
CP0285	WHNT Arafura Swamp Darbilla Creek	1	1		135.006	-12.5272
CP0286	WHNT Arafura Swamp Darbilla Creek	1	1		135.006	-12.5272
CP0288	WHNT Arafura Swamp Darbilla Creek	1	1		135.006	-12.5272
CP0291	WHNT Arafura Swamp Darbilla Creek	1	1		135.006	-12.5272
CP0179	WHNT Elizabeth Downs Station	1	1		130.542	-13.9144
CP0252	WHNT Elizabeth Downs Station	1	1		130.542	-13.9144
CP0066	WHNT King River Goomadeer River	1	1		133.742	-11.8893
CP0034	WHNT King River Goomadeer River	1	1		133.742	-11.8893
CP0057	WHNT King River Goomadeer River	1	1		133.742	-11.8893
CP0170	WHNT King River Goomadeer River	1	1		133.742	-11.8893
CP0263	WHNT King River Goomadeer River	1	1		133.742	-11.8893
CP0300	WHNT King River Goomadeer River	1	1		133.742	-11.8893
CP0301	WHNT King River Goomadeer River	1	1		133.742	-11.8893
CP0308	WHNT King River Goomadeer River	1	1		133.742	-11.8893
CP0331	WHNT King River Goomadeer River	1	1		133.742	-11.8893
CP0360	WHNT King River Goomadeer River	1	1		133.742	-11.8893
CP0380	WHNT King River Goomadeer River	1	1		133.742	-11.8893
CP0044	WHNT Labelle Downs Station	1	1		130.327	-13.1785
CP0053	WHNT Labelle Downs Station	1	1		130.327	-13.1785
CP0176	WHNT Labelle Downs Station	1	1		130.327	-13.1785
CP0193	WHNT Labelle Downs Station	1	1		130.327	-13.1785
CP0250	WHNT Labelle Downs Station	1	1		130.327	-13.1785
CP0255	WHNT Labelle Downs Station	1	1		130.327	-13.1785
CP0257	WHNT Labelle Downs Station	1	1		130.327	-13.1785
CP0259	WHNT Labelle Downs Station	1	1		130.327	-13.1785
CP0262	WHNT Labelle Downs Station	1	1		130.327	-13.1785
CP0268	WHNT Labelle Downs Station	1	1		130.327	-13.1785
CP0272	WHNT Labelle Downs Station	1	1		130.327	-13.1785
CP0019	WHNT Litchfield Station	1	1		130.559	-13.4083
CP0025	WHNT Litchfield Station	1	1		130.559	-13.4083
CP0030	WHNT Litchfield Station	1	1		130.559	-13.4083
CP0035	WHNT Litchfield Station	1	1		130.559	-13.4083
CP0036	WHNT Litchfield Station	1	1		130.559	-13.4083
CP0043	WHNT Litchfield Station	1	1		130.559	-13.4083
CP0046	WHNT Litchfield Station	1	1		130.559	-13.4083
CP0071	WHNT Litchfield Station	1	1		130.559	-13.4083
CP0190	WHNT Litchfield Station	1	1		130.559	-13.4083
CP0196	WHNT Litchfield Station	1	1		130.559	-13.4083
CP0244	WHNT Litchfield Station	1	1		130.559	-13.4083
CP0246	WHNT Litchfield Station	1	1		130.559	-13.4083
CP0247	WHNT Litchfield Station	1	1		130.559	-13.4083
CP0251	WHNT Litchfield Station	1	1		130.559	-13.4083
CP0269	WHNT Litchfield Station	1	1		130.559	-13.4083
CP0270	WHNT Litchfield Station	1	1		130.559	-13.4083
CP0020	WHNT Maningrida Bawinanga Liverpool Rv Blyth Rv	1	1		134.309	-12.1681
CP0023	WHNT Maningrida Bawinanga Liverpool Rv Blyth Rv	1	1		134.309	-12.1681
CP0033	WHNT Maningrida Bawinanga Liverpool Rv Blyth Rv	1	1		134.309	-12.1681
CP0037	WHNT Maningrida Bawinanga Liverpool Rv Blyth Rv	1	1		134.309	-12.1681
CP0165	WHNT Maningrida Bawinanga Liverpool Rv Blyth Rv	1	1		134.309	-12.1681
CP0171	WHNT Maningrida Bawinanga Liverpool Rv Blyth Rv	1	1		134.309	-12.1681
CP0186	WHNT Maningrida Bawinanga Liverpool Rv Blyth Rv	1	1		134.309	-12.1681
CP0191	WHNT Maningrida Bawinanga Liverpool Rv Blyth Rv	1	1		134.309	-12.1681
CP0245	WHNT Maningrida Bawinanga Liverpool Rv Blyth Rv	1	1		134.309	-12.1681
CP0253	WHNT Maningrida Bawinanga Liverpool Rv Blyth Rv	1	1		134.309	-12.1681
CP0297	WHNT Maningrida Bawinanga Liverpool Rv Blyth Rv	1	1		134.309	-12.1681
CP0329	WHNT Maningrida Bawinanga Liverpool Rv Blyth Rv	1	1		134.309	-12.1681
CP0337	WHNT Maningrida Bawinanga Liverpool Rv Blyth Rv	1	1		134.309	-12.1681
CP0338	WHNT Maningrida Bawinanga Liverpool Rv Blyth Rv	1	1		134.309	-12.1681
CP0340	WHNT Maningrida Bawinanga Liverpool Rv Blyth Rv	1	1		134.309	-12.1681
CP0342	WHNT Maningrida Bawinanga Liverpool Rv Blyth Rv	1	1		134.309	-12.1681
CP0374	WHNT Maningrida Bawinanga Liverpool Rv Blyth Rv	1	1		134.309	-12.1681
CP0021	WHNT Tiwi Islands	1	1		130.816	-11.5599
CP0022	WHNT Tiwi Islands	1	1		130.816	-11.5599
CP0024	WHNT Tiwi Islands	1	1		130.816	-11.5599
CP0038	WHNT Tiwi Islands	1	1		130.816	-11.5599
CP0039	WHNT Tiwi Islands	1	1		130.816	-11.5599
CP0041	WHNT Tiwi Islands	1	1		130.816	-11.5599
CP0048	WHNT Tiwi Islands	1	1		130.816	-11.5599
CP0049	WHNT Tiwi Islands	1	1		130.816	-11.5599
CP0050	WHNT Tiwi Islands	1	1		130.816	-11.5599
CP0052	WHNT Tiwi Islands	1	1		130.816	-11.5599
CP0054	WHNT Tiwi Islands	1	1		130.816	-11.5599
CP0056	WHNT Tiwi Islands	1	1		130.816	-11.5599
CP0064	WHNT Tiwi Islands	1	1		130.816	-11.5599
CP0067	WHNT Tiwi Islands	1	1		130.816	-11.5599
CP0068	WHNT Tiwi Islands	1	1		130.816	-11.5599
CP0069	WHNT Tiwi Islands	1	1		130.816	-11.5599
CP0073	WHNT Tiwi Islands	1	1		130.816	-11.5599
CP0078	WHNT Tiwi Islands	1	1		130.816	-11.5599
CP0167	WHNT Tiwi Islands	1	1		130.816	-11.5599
CP0169	WHNT Tiwi Islands	1	1		130.816	-11.5599
CP0178	WHNT Tiwi Islands	1	1		130.816	-11.5599
CP0185	WHNT Tiwi Islands	1	1		130.816	-11.5599
CP0188	WHNT Tiwi Islands	1	1		130.816	-11.5599
CP0189	WHNT Tiwi Islands	1	1		130.816	-11.5599
CP0192	WHNT Tiwi Islands	1	1		130.816	-11.5599
CP0194	WHNT Tiwi Islands	1	1		130.816	-11.5599
CP0195	WHNT Tiwi Islands	1	1		130.816	-11.5599
CP0248	WHNT Tiwi Islands	1	1		130.816	-11.5599
CP0249	WHNT Tiwi Islands	1	1		130.816	-11.5599
CP0254	WHNT Tiwi Islands	1	1		130.816	-11.5599
CP0256	WHNT Tiwi Islands	1	1		130.816	-11.5599
CP0258	WHNT Tiwi Islands	1	1		130.816	-11.5599
CP0260	WHNT Tiwi Islands	1	1		130.816	-11.5599
CP0261	WHNT Tiwi Islands	1	1		130.816	-11.5599
CP0264	WHNT Tiwi Islands	1	1		130.816	-11.5599
CP0265	WHNT Tiwi Islands	1	1		130.816	-11.5599
CP0266	WHNT Tiwi Islands	1	1		130.816	-11.5599
CP0279	WHNT Tiwi Islands	1	1		130.816	-11.5599
CP0282	WHNT Tiwi Islands	1	1		130.816	-11.5599
CP0287	WHNT Tiwi Islands	1	1		130.816	-11.5599
CP0032	WHNT Wagait Finniss River	1	1		130.466	-12.9446
CP0074	WHNT Wagait Finniss River	1	1		130.466	-12.9446
CP0164	WHNT Wagait Finniss River	1	1		130.466	-12.9446
CP0029	WHNT Welltree Station	1	1		130.561	-13.217
CP0199	WMI Djukbinj National Park	1	1		131.386	-12.4418
CP0200	WMI Djukbinj National Park	1	1		131.386	-12.4418
CP0201	WMI Djukbinj National Park	1	1		131.386	-12.4418
CP0202	WMI Djukbinj National Park	1	1		131.386	-12.4418
CP0203	WMI Djukbinj National Park	1	1		131.386	-12.4418
CP0204	WMI Djukbinj National Park	1	1		131.386	-12.4418
CP0207	WMI Djukbinj National Park	1	1		131.386	-12.4418
CP0208	WMI Djukbinj National Park	1	1		131.386	-12.4418
CP0397	WMI Djukbinj National Park	1	1		131.386	-12.4418
CP0399	WMI Djukbinj National Park	1	1		131.386	-12.4418
CP0205	WMI Harrison Dam	1	1		131.355	-12.59
CP0400	WMI Harrison Dam	1	1		131.355	-12.59
CP0401	WMI Koolpinyah Station	1	1		131.234	-12.4019

## Sheet: Siteloc
1	19	1	19
n	Site	Long	Lat	Region
7	DEMED East Alligator River	#N/A	#N/A	Cobourg and Murganella Creek
9	Janamba Coburg Peninsula	132.245	-11.3484	NANANA
2	Janamba Donalds Lagoon Station	131.25	-12.7476	Adelaide River
7	Janamba Muk Muk Mugalimba	130.366	-13.015	Finniss River
9	Janamba Swim Creek Station	131.816	-12.336	Mary River
2	Walker Beatrice Hill Station	131.28	-12.675	Adelaide River
2	WHNT Adelaide River Station	131.309	-12.8135	Adelaide River
40	WHNT Arafura Swamp Darbilla Creek	135.006	-12.5272	Arafura Swamp
2	WHNT Elizabeth Downs Station	130.542	-13.9144	Finniss River
11	WHNT King River Goomadeer River	133.742	-11.8893	Maningrida King River
11	WHNT Labelle Downs Station	130.327	-13.1785	Finniss River
16	WHNT Litchfield Station	130.559	-13.4083	Finniss River
17	WHNT Maningrida Bawinanga Liverpool Rv Blyth Rv	134.309	-12.1681	Maningrida King River
40	WHNT Tiwi Islands	130.816	-11.5599	Tiwi Islands
3	WHNT Wagait Finniss River	130.466	-12.9446	Finniss River
1	WHNT Welltree Station	130.561	-13.217	Finniss River
10	WMI Djukbinj National Park	131.386	-12.4418	Adelaide River
2	WMI Harrison Dam	131.355	-12.59	Adelaide River
1	WMI Koolpinyah Station	131.234	-12.4019	Adelaide River
