# Supplementary figures and images for: Translocation, genetic structure and homing ability confirm geographic barriers disrupt saltwater crocodile movement and dispersal
Source: PLOS journal article supplement (doi:10.1371/journal.pone.0205862), 2019-08-28

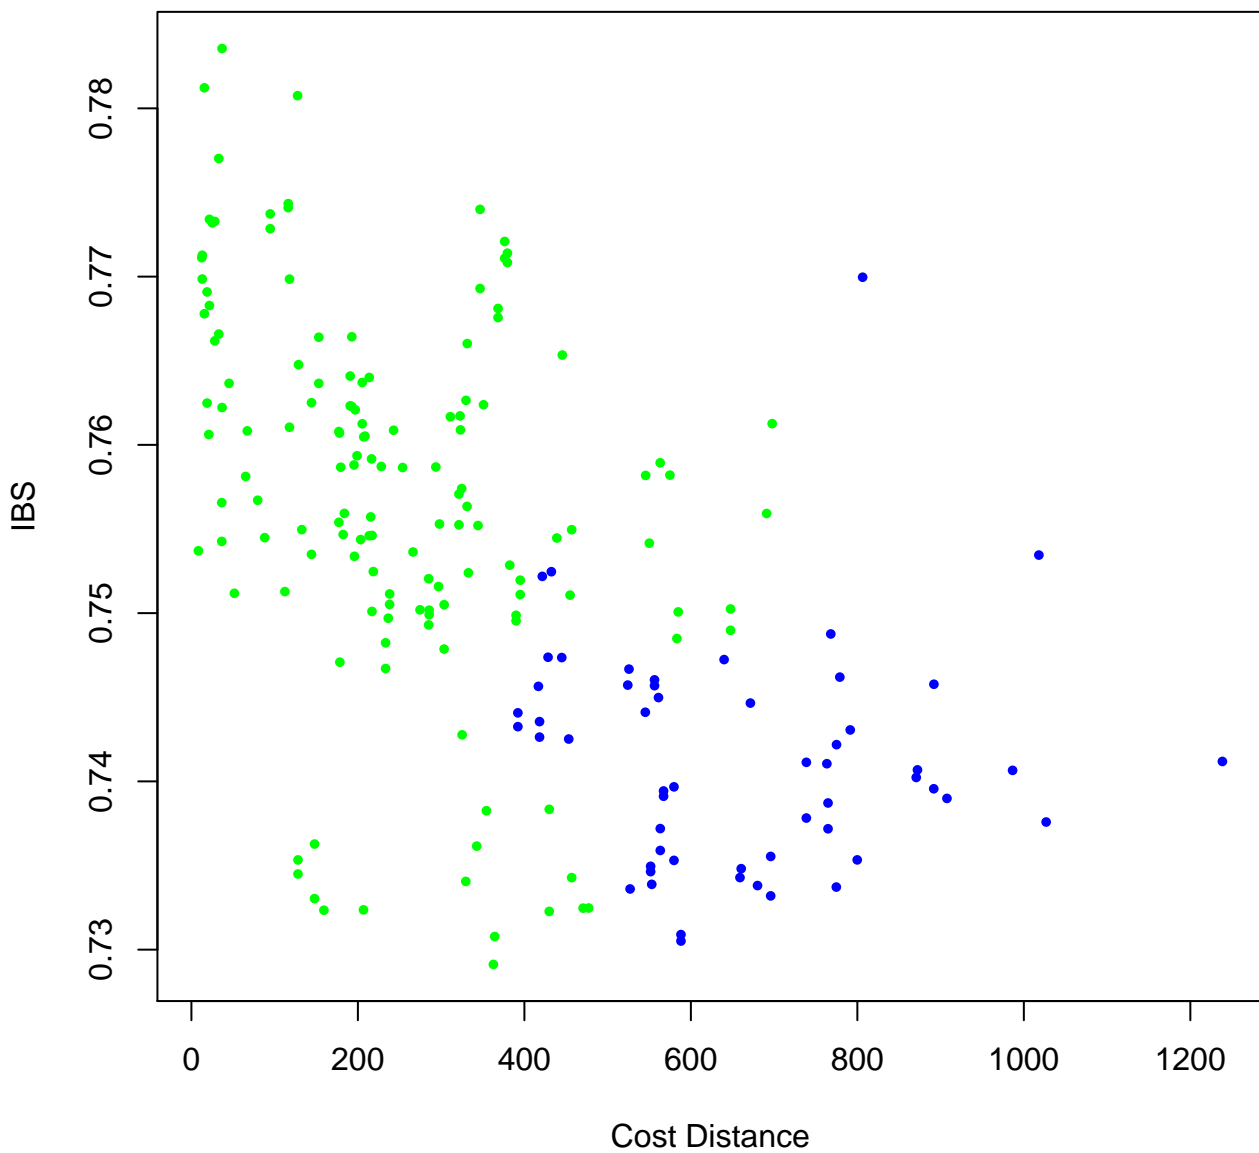

Supplement: S1 (10.1371/journal.pone.0205862.s001) [file journal.pone.0205862.s001]

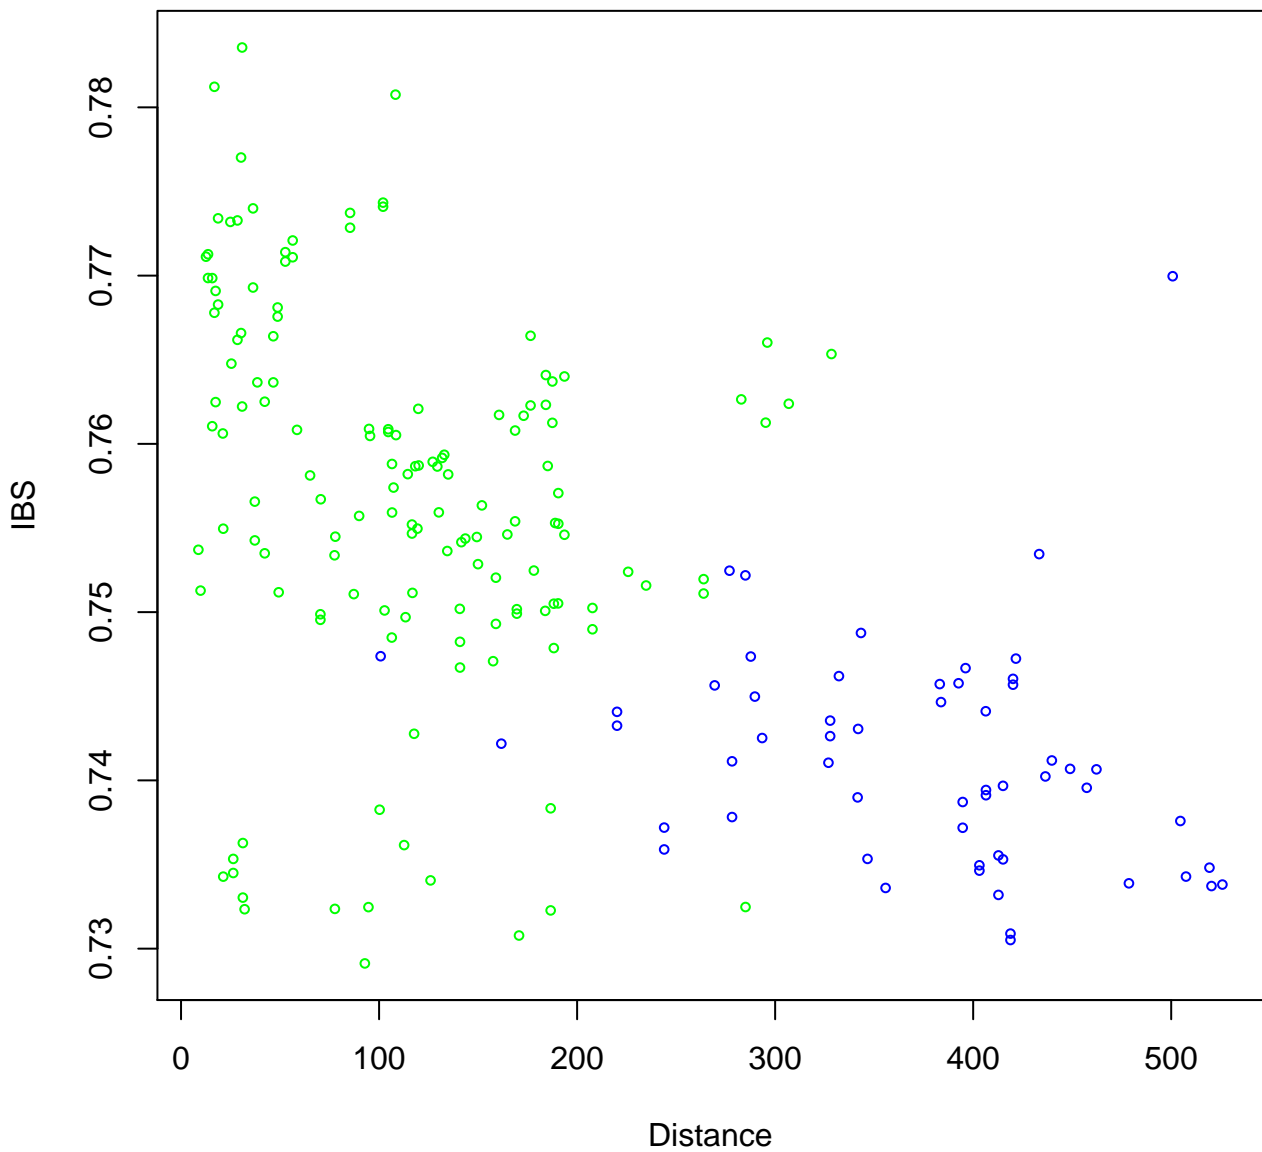

Supplement: S1 (10.1371/journal.pone.0205862.s001) [file journal.pone.0205862.s001]
